# Supplementary material for: Lipidomic Analysis on Gender-Dependent Hepatocellular Carcinogenesis in Hras12V Transgenic Mice
Source: Preprints.org preprint supplement (doi:10.20944/preprints202311.1406.v1), 2023-11-22
Supplement: Supplementary file 1 [file Table.S1.xlsx]

## Sheet: Sheet1
Table S2. Detailed information for identified lipids
Note: M, Male; F, Female; W, liver tissues of wild-type mice; P, Peri-tumor tissues of Hras12V transgenic mice; T, HCC tissues of Hras12V transgenic mice.
Identification number	Electrospray mode	m/z	Retention time	Corrected retention time	Adduct species	Lipid description	Lipid name	MW						MP						MT						FW						FP						FT
	Electrospray mode	mz	rt	rtcor	Adduct	Lipid description		MW1	MW2	MW3	MW4	MW5	MW6	MP1	MP2	MP3	MP4	MP5	MP6	MT1	MT2	MT3	MT4	MT5	MT6	FW1	FW2	FW3	FW4	FW5	FW6	FP1	FP2	FP3	FP4	FP5	FP6	FT1	FT2	FT3	FT4	FT5	FT6
V1	HESI(+)	300.29	1.94	1.76	M+H	NAE(16:0)	NAE 16:0	9.98716e+06	8.8928e+06	0	1.54808e+06	4.85549e+06	7.52084e+06	1.11846e+07	1.72512e+07	3.32358e+06	3.31855e+06	4.50636e+06	1.2787e+06	1.23396e+07	6.74044e+06	1.30586e+06	1.41046e+07	8.41519e+06	7.56012e+06	1.53488e+06	23937.7	1.93896e+06	813986	1.8808e+06	848490	6.71078e+06	1.5591e+06	1.42979e+06	3.38922e+06	0	2.17982e+06	3.73125e+06	375116	1.01274e+07	2.88511e+07	1.4243e+07	3.59586e+06
V2	HESI(+)	302.305	1.87	1.69	M+H	SPH(d18:0)	SPH 18:0	1.14895e+07	2.13059e+07	9.00468e+06	1.45866e+07	2.20921e+06	3.50274e+07	0	1.26252e+07	9.18746e+06	6.14558e+06	648282	502240	5.12534e+06	1.4354e+07	1.27162e+07	2.96029e+07	4.22856e+07	2.80645e+07	1.24924e+07	2.01963e+07	1.31654e+07	2.75725e+07	3.0017e+07	8.02522e+07	8.86299e+07	5.48404e+07	1.72516e+07	8.92775e+07	3.1437e+07	3.72823e+07	3.47925e+07	3.92645e+07	1.00923e+08	2.70346e+08	9.54773e+07	8.82964e+07
V3	HESI(+)	312.326	4.42	4.07	M+H	SPH(d20:1)	SPH 20:1	2.93178e+07	3.6288e+07	3.49094e+07	3.56526e+07	3.19758e+07	2.73947e+07	2.69206e+07	3.94697e+07	3.09952e+07	3.98541e+07	5.21449e+07	4.50277e+07	2.77193e+07	2.95256e+07	3.76883e+07	3.53086e+07	2.72988e+07	3.64326e+07	2.36443e+07	2.98087e+07	2.17417e+07	2.43696e+07	2.9408e+07	2.85736e+07	2.67133e+07	4.33376e+07	3.07956e+07	3.49479e+07	3.68708e+07	3.88734e+07	2.9237e+07	3.51715e+07	3.19481e+07	3.04201e+07	4.16538e+07	3.67964e+07
V4	HESI(+)	320.256	1.41	1.21	M+Na	SPH(d18:2)	SPH 18:2	0	4.04025e+07	1.89993e+07	2.33971e+07	1.46691e+07	726421	522423	0	3.63753e+07	2.77849e+07	2.57798e+07	1.30032e+07	3.64894e+07	4.23382e+07	4.6459e+07	4.53209e+07	1.90534e+07	2.66374e+07	3.38959e+07	1.02516e+07	2.87919e+07	2.66217e+07	1.28644e+07	2.4081e+07	4.29905e+07	6.50666e+06	3.2924e+07	7.9403e+07	3.01879e+06	4.2467e+07	3.14102e+07	5.00946e+07	3.67475e+06	5.2932e+06	2.06238e+07	7.60812e+07
V5	HESI(+)	323.258	1.18	0.98	M+H	MG(P-17:3)	MG O-17:4	2.9133e+07	2.89252e+07	1.59318e+07	1.77899e+07	2.14935e+07	1.79804e+07	4.55898e+06	1.32708e+06	2.2816e+06	2.52229e+06	9.97738e+06	3.13956e+06	0	244941	188316	0	468623	759436	645581	976703	1.01045e+06	3.51097e+06	762526	840408	2.26011e+07	0	512317	21110	693514	490954	0	408682	0	0	0	266506
V6	HESI(+)	326.287	4.21	3.92	M+H	NAE(18:1)	NAE 18:1	4.68545e+07	3.62629e+07	1.26334e+08	9.56979e+07	6.00445e+07	8.61406e+06	3.16738e+07	1.93314e+07	4.61171e+07	5.131e+07	140425724	9.7692e+06	2.07163e+07	5.58416e+07	6.07977e+07	3.04867e+07	1.18916e+07	3.81713e+07	1.44442e+07	7.39406e+06	2.79456e+06	2.65464e+06	8.31682e+06	1.28386e+07	1.32507e+07	6.08429e+06	3.31254e+06	3.61763e+06	0	2.13951e+07	6.47358e+06	3.20742e+07	5.26396e+06	1.0515e+07	6.35654e+06	7.92937e+06
V7	HESI(+)	326.305	2.34	2.2	M+NH4	WE(O-10:1_10:1)	WE O-20:2	4.74809e+07	4.91719e+07	4.41449e+07	6.5864e+07	4.30858e+07	3.85286e+07	6.11317e+07	4.34486e+07	6.45287e+07	4.95686e+07	4.56168e+07	3.99782e+07	2.75395e+07	2.23539e+07	4.12169e+07	4.51531e+07	2.90434e+07	1.93752e+07	6.026e+07	6.98959e+07	54585497	63716901	7.5028e+07	5.55261e+07	3.9179e+07	7.63717e+07	9.27959e+07	7.23954e+07	8.0608e+07	5.25934e+07	1.94654e+07	1.59887e+07	1.73486e+07	2.63361e+07	2.13852e+07	3.67085e+07
V8	HESI(+)	328.322	2.87	2.74	M+H	NAE(18:0)	NAE 18:0	8.3607e+07	1.09423e+08	124684563	1.41843e+08	103263027	9.32362e+07	1.13147e+08	7.41298e+07	1.42871e+08	121677779	9.64598e+07	1.26895e+08	3.86288e+07	3.17747e+07	5.7375e+07	1.09387e+08	4.04645e+07	3.89309e+07	2.02612e+08	2.19574e+08	1.7446e+08	202655091	1.94281e+08	165247977	8.45537e+07	305576596	2.67749e+08	2.65665e+08	2.44389e+08	160938057	2.68352e+07	4.08454e+07	4.09086e+07	5.87287e+07	3.93012e+07	3.10045e+07
V9	HESI(+)	338.342	5.49	4.69	M+H	13-Docosenamide	13-Docosenamide	1.61973e+07	1.25495e+07	9.22717e+06	1.31959e+07	1.13729e+07	1.28837e+07	1.28483e+07	1.54952e+07	2.07969e+07	1.77054e+07	1.65838e+07	1.64681e+07	1.59593e+07	1.83981e+07	1.803e+07	2.508e+07	1.16867e+07	2.08155e+07	5.0582e+06	1.62964e+07	1.78491e+07	1.304e+07	6.67271e+06	1.21786e+07	1.99837e+07	1.25543e+07	7.08539e+06	1.99822e+07	9.0928e+06	5.24259e+06	1.98533e+07	2.26709e+07	1.47539e+07	1.64962e+07	1.80057e+07	1.70003e+07
V10	HESI(+)	342.336	2.04	1.88	M+NH4	WE(O-11:0_10:1)	WE O-21:1	1.00914e+06	3.77461e+06	1.09957e+07	4.89593e+06	1.89626e+07	8.76136e+06	2.20069e+06	4.78726e+06	9.20963e+06	1.5057e+07	1.59141e+07	8.13131e+06	1.74104e+06	2.2334e+06	1.34584e+06	6.35322e+06	6.16482e+06	6.1614e+06	8.26944e+06	4.79394e+06	4.18092e+06	2.99143e+06	1.38346e+07	8.65563e+06	1.28013e+06	820471	3.06678e+06	2.64746e+06	3.7361e+06	3.96475e+06	524717	377168	974014	2.55037e+06	1.86158e+06	1.38734e+07
V11	HESI(+)	342.337	1.97	1.8	M+H	NAE(19:0)	NAE 19:0	1.86923e+06	2.56979e+06	26919	441957	411081	508559	3.75817e+06	3.55986e+06	2.79488e+06	4.34831e+06	259394	204662	40707.8	832177	877355	5.23646e+06	660637	76809.1	47470.3	4.27782e+06	1.74972e+06	2.06671e+06	1.60707e+06	435103	191211	599849	1.39009e+06	278709	5.70048e+06	603475	96286.1	533757	484822	527066	141873	301930
V12	HESI(+)	348.264	0.93	0.73	M+H	NAE(20:4)	NAE 20:4	723815	888096	3.88952e+06	993039	1.09531e+07	602721	7.43951e+06	2.8287e+06	1.80911e+06	1.14334e+06	1.54068e+06	875992	3.20493e+06	2.50013e+06	5.29403e+06	4.04783e+06	1.9775e+06	2.5626e+06	558398	613454	1.45575e+06	1.52328e+06	768758	1.12176e+06	4.88661e+06	5.82953e+06	4.83987e+06	4.16888e+06	5.04201e+06	6.12028e+06	6.26151e+06	5.31095e+06	4.72854e+06	3.06202e+06	2.2883e+06	1.45044e+06
V13	HESI(+)	349.274	1.44	1.24	M+H	MG(P-19:4)	MG O-19:5	2.24267e+07	2.16634e+07	9.74108e+06	6.80959e+06	4.17167e+07	2.66912e+07	2.17252e+06	1.34091e+06	4.52772e+06	3.52254e+06	2.70321e+06	5.07751e+06	3.41058e+06	2.39896e+06	3.66263e+06	1.50485e+06	744798	4.95843e+06	1.14584e+07	1.03606e+07	1.27287e+07	1.78072e+07	1.60047e+07	1.20965e+07	1.23524e+06	3.01088e+06	3.03195e+06	5.93846e+06	6.50167e+06	2.21929e+06	4.59474e+06	6.57632e+06	2.89806e+06	4.98926e+06	2.8555e+06	1.74582e+06
V14	HESI(+)	350.217	1.11	0.9	M+H	NAE(20:3)	NAE 20:3	2.05512e+07	2.04627e+07	5.34586e+06	2.7782e+07	2.24427e+07	1.24694e+07	2.74652e+07	3.09616e+07	3.21759e+07	2.94681e+07	2.89992e+07	2.45941e+07	2.8856e+07	4.19292e+07	3.01124e+07	3.81929e+07	3.82834e+07	2.91795e+07	2.47399e+07	2.84998e+07	3.2763e+07	2.96533e+07	2.26621e+07	2.82136e+07	2.47285e+07	3.4068e+07	3.01182e+07	2.50534e+07	1.92719e+07	2.31774e+07	3.99035e+07	4.81396e+07	3.58948e+07	3.06434e+07	2.94413e+07	3.29244e+07
V15	HESI(+)	352.321	2.43	2.29	M+H	NAE(20:2)	NAE 20:2	5.52631e+06	4.62081e+06	3.87894e+06	5.91521e+06	4.72924e+06	5.58756e+06	3.19153e+06	4.71994e+06	5.16576e+06	4.02091e+06	5.7009e+06	4.35629e+06	3.98306e+06	3.11144e+06	3.96003e+06	4.07961e+06	3.6642e+06	4.19155e+06	3.76284e+06	3.78576e+06	2.94706e+06	4.13719e+06	3.27492e+06	4.93617e+06	3.86298e+06	3.33448e+06	4.02388e+06	5.07729e+06	5.92716e+06	2.63779e+06	1.45307e+06	3.7053e+06	2.72397e+06	4.73119e+06	3.02999e+06	3.27453e+06
V16	HESI(+)	352.321	1.97	1.8	M+NH4	WE(O-20:3_2:0)	WE O-22:3	8.04872e+07	4.94246e+07	2.18437e+07	6.12262e+07	2.26018e+07	1.03571e+08	3.29022e+07	2.71888e+07	9.84955e+07	4.27762e+07	3.66193e+07	3.90611e+07	5.01831e+07	4.28371e+07	1.02308e+08	4.85005e+07	4.82291e+07	6.7381e+07	4.70536e+07	3.49709e+07	32195127	4.30154e+07	1.72637e+07	5.45718e+07	4.42025e+07	5.82489e+07	3.03902e+07	7.4539e+07	7.71713e+07	3.03301e+07	4.25171e+07	1.3395e+08	9.93188e+07	7.98295e+07	5.61929e+07	5.52211e+07
V17	HESI(+)	356.352	3	2.87	M+H	NAE(20:0)	NAE 20:0	8.52248e+07	2.55347e+07	5.13198e+07	1.30256e+08	9.78387e+07	5.42426e+07	1.24511e+08	1.03894e+08	1.31148e+08	7.79564e+07	1.72953e+08	3.23767e+07	7.40155e+07	1.35389e+08	5.88374e+07	7.4042e+07	1.36655e+08	1.00733e+08	6.4037e+07	7.08019e+07	3.21635e+07	2.39024e+07	7.62245e+07	7.58537e+07	7.97735e+07	8.60228e+07	8.58517e+07	5.84652e+07	6.69691e+07	5.64571e+07	1.04583e+08	1.53099e+08	1.40527e+08	7.02536e+07	4.84695e+07	110913964
V18	HESI(+)	368.353	2.17	2.01	M+NH4	WE(O-20:2_3:0)	WE O-23:2	406342	8.40507e+06	2.55806e+07	2.29135e+07	3.84467e+07	1.64515e+07	528826	7.3012e+06	3.07514e+07	7.86856e+07	3.59162e+07	3.12309e+07	0	727280	3.72292e+06	7.43935e+06	4.32959e+06	3.6796e+06	2.35253e+07	4.19204e+06	3.3219e+07	6.04788e+06	4.93162e+07	2.54019e+07	8214	1.83398e+06	3.60397e+06	5.31802e+06	1.41175e+07	3.98657e+06	1729.84	78690.5	128647	2.42637e+06	653875	3.59103e+06
V19	HESI(+)	368.353	2.11	1.95	M+H	NAE(21:1)	NAE 21:1	834106	5.84929e+06	103594	1.57648e+06	2.13221e+06	927801	1.74602e+06	2.30648e+07	8.0126e+06	1.95116e+07	972197	1.21372e+06	0	1.16481e+06	955513	2.30166e+06	348922	27585.8	54905.9	1.80899e+07	3.64877e+06	1.10432e+06	1.21935e+06	456160	83210.8	1.40835e+06	1.01339e+07	40325.5	1.36039e+06	587781	51191.6	1.07756e+06	570825	705111	273267	77704.7
V20	HESI(+)	369.351	5.58	4.73	M+H-H20	cholesterol	CE 0:0	2.77706e+08	2.54017e+08	2.05807e+08	2.783e+08	203010152	1.54878e+08	7.63128e+08	8.60587e+08	6.14709e+08	614593426	5.39457e+08	4.06963e+08	2.90306e+08	4.40347e+08	2.36969e+08	1.97371e+08	5.66042e+07	2.2473e+08	1.25457e+08	1.73796e+08	1.51094e+08	1.42593e+08	1.68716e+08	1.26849e+08	2.45911e+08	4.57819e+08	409333741	276942779	2.64306e+08	6.1222e+08	1.76418e+08	2.03358e+08	1.87914e+08	6.82137e+07	7.21217e+07	2.34261e+08
V21	HESI(+)	370.367	2.49	2.35	M+H	NAE(21:0)	NAE 21:0	274425	421202	7336.18	0	0	0	117592	517673	13860.9	21366.5	0	56189.5	0	360505	59241.6	0	67514.9	0	0	1.46121e+06	170477	21544.6	0	0	7806.87	98829.1	41837.7	1853.74	0	2725.6	26940.3	112557	171911	5485.63	0	0
V22	HESI(+)	370.368	2.61	2.48	M+NH4	WE(O-20:1_3:0)	WE O-23:1	76351.3	294289	78669.2	1.23884e+06	4.30428e+06	472144	0	4669.99	124990	2.0365e+06	2.41458e+06	2.64212e+06	176945	166768	417196	970060	945078	1.31411e+06	210934	476544	1.08236e+06	829819	4.9895e+06	3.62276e+06	18929.8	0	159743	2.91191e+06	1.09036e+06	1.39867e+06	80000.9	0	13277.3	416271	278867	470109
V23	HESI(+)	372.29	1.86	1.69	M+H	NAE(22:6)	NAE 22:6	8.6477e+06	7.94137e+06	0	0	0	4.3704e+06	2.00186e+06	2.91628e+06	0	0	0	0	1.69676e+06	1.46405e+07	1.00861e+07	4.94197e+06	8.63589e+06	0	1.35901e+06	4.1145e+06	9.77097e+06	8.54583e+06	6.13024e+06	4.31526e+06	0	1.81435e+06	6.65127e+06	3.00732e+06	2.0441e+06	0	2.79125e+06	3.59198e+06	4.25267e+06	3.97821e+06	3.62901e+06	0
V24	HESI(+)	372.312	1.41	1.21	M+H	CAR(14:0)	CAR 14:0	3.71596e+07	3.07433e+07	1.12518e+08	8.68446e+07	2.25725e+07	1.16133e+07	4.63564e+07	3.77198e+07	4.61788e+07	4.12407e+07	4.0662e+07	3.10953e+07	1.0368e+08	2.86526e+08	1.25504e+08	1.46978e+08	6.99036e+07	1.04579e+08	2.38506e+07	3.91843e+07	2.53663e+07	2.83295e+07	2.27375e+07	2.05381e+07	1.67595e+07	2.85138e+07	1.3782e+07	2.03094e+07	1.96602e+07	1.90436e+07	5.22471e+07	7.01061e+07	8.79897e+07	8.20126e+07	3.03784e+07	3.39328e+07
V25	HESI(+)	376.318	2.34	2.19	M+H	NAE(22:4)	NAE 22:4	1.04432e+08	7.42316e+07	2.74951e+07	9.82492e+07	4.37198e+07	9.80622e+07	1.19231e+08	9.16394e+07	2.02508e+08	8.56439e+07	1.0184e+08	5.99566e+07	4.84931e+07	8.61261e+07	122442998	6.8638e+07	8.03929e+07	1.284e+08	5.91518e+07	8.57738e+07	4.84283e+07	3.32327e+07	2.95487e+07	7.58805e+07	8.60105e+07	1.14819e+08	3.23533e+07	9.92901e+07	1.90592e+08	2.5403e+07	8.86172e+07	2.81596e+08	161991308	1.56527e+08	8.20479e+07	9.04327e+07
V26	HESI(+)	376.319	2.15	1.99	M+NH4	WE(O-20:5_4:0)	WE O-24:5	1.27926e+07	1.08859e+07	5.38005e+06	1.23942e+07	3.33256e+06	9.79419e+06	4.20565e+06	2.02305e+06	9.34277e+06	1.08693e+07	9.14266e+06	3.73319e+06	4.39707e+06	2.66679e+06	2.75159e+06	1.49639e+07	1.21966e+07	8.32199e+06	8.28028e+06	5.59496e+06	6.24949e+06	5.99232e+06	6.27178e+06	1.10546e+07	6.95907e+06	4.79129e+06	4.20367e+06	1.0567e+07	2.67275e+07	4.33614e+06	1.69355e+06	4.82876e+06	1.05581e+07	1.12599e+07	5.74383e+06	8.2221e+06
V27	HESI(+)	384.383	5.34	4.61	M+H	NAE(22:0)	NAE 22:0	4.3626e+06	4.08839e+06	4.11624e+06	4.12011e+06	5.10114e+06	3.57505e+06	2.51841e+06	5.92866e+06	2.26907e+06	3.49549e+06	7.2396e+06	4.8184e+06	3.86272e+06	5.51481e+06	4.51203e+06	4.26195e+06	2.84098e+06	4.57963e+06	3.28491e+06	3.98464e+06	3.50992e+06	2.53028e+06	3.99757e+06	3.26844e+06	3.6513e+06	3.51696e+06	1.88301e+06	2.57195e+06	3.57621e+06	6.37335e+06	3.55675e+06	4.37597e+06	4.04368e+06	4.99768e+06	3.27848e+06	4.42564e+06
V28	HESI(+)	384.384	5.26	4.57	M+NH4	WE(O-20:1_4:0)	WE O-24:1	2.46786e+07	3.43258e+07	2.34916e+07	2.24289e+07	2.59406e+07	2.09749e+07	1.68497e+07	3.46877e+07	1.67091e+07	3.40964e+07	4.07635e+07	2.42618e+07	1.94449e+07	3.26171e+07	2.98433e+07	2.4434e+07	1.59454e+07	2.30397e+07	1.73674e+07	1.78817e+07	1.76353e+07	1.87938e+07	2.19972e+07	1.81853e+07	1.89338e+07	2.43136e+07	1.74803e+07	1.96407e+07	2.244e+07	3.0059e+07	2.06277e+07	2.30512e+07	2.73349e+07	2.49143e+07	2.47136e+07	1.96866e+07
V29	HESI(+)	389.266	2.9	2.77	M+H	DAP(O-12:0_4:1)	DAP O-16:1	2.13655e+06	5.61997e+06	6.75017e+06	4.67492e+06	3.46996e+06	6.26344e+06	7.76817e+06	7.65006e+06	3.43915e+06	2.37051e+06	2.0575e+06	9.13362e+06	1.96383e+06	436311	469745	1.66842e+06	746375	633287	7.07774e+06	1.14872e+07	7.69852e+06	5.27036e+06	1.56734e+07	4.31227e+06	1.38779e+06	1.5946e+07	2.07721e+07	1.39879e+07	2.22906e+07	1.04487e+07	449598	1.06493e+06	760180	1.72965e+06	676930	801890
V30	HESI(+)	391.284	3.95	3.72	M+H	DAP(O-12:0_O-4:0)	DAP 2O-16:0	6.77845e+07	3.80539e+07	3.98208e+07	6.17847e+07	3.93484e+07	3.8184e+07	76317368	6.54181e+07	6.09269e+07	7.71373e+07	4.30207e+07	4.45209e+07	3.89421e+07	4.64321e+07	7.61636e+07	6.1409e+07	6.01004e+07	5.56407e+07	4.01264e+07	7.62063e+07	4.31387e+07	5.43895e+07	76249786	6.13265e+07	9.03962e+07	7.19344e+07	1.2398e+08	9.15058e+07	8.39646e+07	6.87675e+07	7.15678e+07	9.57993e+07	9.00425e+07	1.13358e+08	8.63951e+07	7.98364e+07
V31	HESI(+)	392.314	2	1.83	M+NH4	MG(O-21:6)	MG O-21:6	124286643	6.04308e+07	8.37918e+06	41710619	2.61548e+07	6.38386e+07	3.61338e+07	1.06922e+07	1.11082e+08	3.91973e+07	3.71846e+07	3.32496e+07	4.82998e+07	4.76937e+07	4.43332e+07	5.2114e+07	5.77922e+07	5.36515e+07	6.74251e+07	1.19367e+07	9.27794e+06	1.0922e+07	9.14291e+06	7.78139e+07	3.79049e+07	1.42143e+07	9.82711e+06	1.69184e+07	5.1399e+07	1.70221e+07	3.88977e+07	1.30604e+08	1.95796e+07	2.52666e+07	4.1167e+07	3.50195e+07
V32	HESI(+)	398.326	1.48	1.28	M+H	CAR(16:1)	CAR 16:1	3.39818e+07	3.99924e+07	7.15916e+07	7.69719e+07	5.99311e+07	2.81591e+07	8.31833e+07	5.10903e+07	1.16751e+08	7.30946e+07	1.17839e+08	8.65841e+07	2.23789e+08	3.34762e+08	2.29963e+08	322914920	4.22069e+08	2.69188e+08	2.5437e+07	2.65827e+07	2.20755e+07	2.60595e+07	1.53381e+07	2.58769e+07	2.56107e+07	5.53072e+07	3.95864e+07	4.69333e+07	4.77928e+07	6.91499e+07	2.30263e+08	2.75847e+08	5.47721e+08	1.96145e+08	1.0337e+08	1.82538e+08
V33	HESI(+)	400.27	1.19	0.98	M+NH4	TG(14:2_2:0_2:0)	TG 18:2	4.0511e+07	9.49848e+07	1.3686e+08	1.93684e+08	9.2826e+07	3.14649e+07	1.06624e+08	1.04805e+08	2.37245e+07	3.32853e+07	2.43608e+07	3.9557e+07	2.65704e+06	792462	1.59832e+06	1.17556e+06	1.34058e+06	1.21753e+06	6.84753e+06	2.63027e+07	1.49729e+07	6.67415e+06	3.34703e+07	1.60886e+07	7.50099e+07	8.47865e+07	6.58762e+07	7.2685e+07	7.88545e+07	9.29975e+07	0	260890	1.31291e+06	3.72251e+06	0	0
V34	HESI(+)	400.342	1.69	1.5	M+H	CAR(16:0)	CAR 16:0	3.59564e+08	2.67934e+08	4.06904e+08	4.14821e+08	3.76436e+08	2.14419e+08	3.76512e+08	4.25813e+08	4.44144e+08	4.91255e+08	5.20676e+08	4.22966e+08	1742624440	4227530021	1361222991	1969629621	1566355804	1360774161	3.71733e+08	492858965	3.26457e+08	2.6166e+08	3.15947e+08	548496002	2.97256e+08	278651739	3.02885e+08	3.97546e+08	3.21531e+08	3.70933e+08	8.74229e+08	1189134508	1919722011	1576456465	5.34755e+08	751420541
V35	HESI(+)	401.342	3.44	3.28	M+Na	WE(O-20:2_5:0)	WE O-25:2	6.10309e+06	1.16141e+06	6.80905e+06	1.7589e+06	5.28856e+06	3.54218e+06	4.31433e+06	7.42574e+07	2.57248e+07	1.78482e+07	6.63188e+06	1.08076e+07	2.22766e+06	1.06254e+07	1.7731e+06	5.84941e+06	1.1419e+06	4.52627e+06	3.52e+07	8.34749e+06	3.32778e+07	9.6783e+06	1.08454e+07	9.9804e+06	201375	1.04654e+07	2.08533e+07	2.37254e+07	2.99041e+07	7.66791e+07	1.36288e+06	1.26296e+07	1.63374e+06	6.87498e+06	2.22157e+06	9.49965e+06
V36	HESI(+)	406.051	0.98	0.78	M+Na	LPC(18:0)	LPC 18:0	48604.9	68887.8	86165.6	169125	112421	77990.3	45846.6	224515	111286	148309	129555	188604	0	0	0	0	0	0	38772.1	174697	0	0	0	258524	271479	340187	201149	265707	205807	337455	0	0	55989.1	0	0	0
V37	HESI(+)	407.352	4.91	4.38	M+H	MG(O-23:4)	MG O-23:4	3.27625e+06	5.17725e+06	6.32459e+06	2.70369e+06	3.76226e+06	1.27453e+07	2.72887e+06	5.43044e+06	6.99007e+06	2.31308e+06	627080	8.0894e+06	437654	0	427498	1.02225e+06	1.04615e+06	0	8.95004e+06	3.38338e+07	8.41605e+06	5.2925e+06	1.90299e+07	1.70805e+07	1.97058e+06	3.30792e+07	3.42739e+07	2.37947e+07	4.30179e+07	2.56243e+07	1.18292e+06	388752	1.45927e+06	704471	0	0
V38	HESI(+)	409.332	3.18	3.04	M+Na	DG(O-4:0_16:0)	DG O-20:0	1.20398e+07	2.01638e+07	1.42209e+07	1.23245e+07	1.52422e+07	3.19884e+07	3.08195e+07	3.40189e+07	1.65354e+07	1.35594e+07	9.36622e+06	3.8481e+07	2.85654e+06	361972	1.17234e+06	2.95214e+06	1.31456e+06	339632	2.33624e+07	4.13327e+07	2.65773e+07	2.0796e+07	4.53117e+07	1.83902e+07	8.58202e+06	4.96778e+07	5.57115e+07	4.28112e+07	9.60651e+07	2.06091e+07	1.05576e+06	1.72614e+06	253205	4.39431e+06	405066	610939
V39	HESI(+)	419.277	2.82	2.69	M+Na	TG(P-3:0_4:0_13:1)	TG O-20:2	4.68021e+07	3.19757e+07	4.78687e+07	4.64363e+07	4.42207e+07	5.2487e+07	3.20814e+07	6.80671e+07	5.34422e+07	4.71862e+07	3.92324e+07	8.28343e+07	3.17242e+07	2.95783e+07	3.01286e+07	3.02895e+07	3.07986e+07	3.03049e+07	5.36162e+07	6.10595e+07	5.39821e+07	6.03291e+07	8.16528e+07	4.77309e+07	1.74748e+07	5.29676e+07	6.37984e+07	5.60535e+07	8.30666e+07	6.50572e+07	1.40887e+07	2.34024e+07	2.93541e+07	3.34251e+07	2.78836e+07	3.28779e+07
V40	HESI(+)	422.269	1.69	1.5	M+H	LPC(P-12:1)	LPC O-12:2	1.38398e+06	1.76305e+07	4.61315e+07	3.02664e+07	2.86271e+07	1.23686e+07	7.75904e+07	5.04029e+07	1.29307e+06	1.13794e+06	3.89172e+06	2.04525e+07	1.5411e+07	2.90509e+06	2.08902e+06	2.90886e+06	669538	1.16826e+06	0	4.91911e+06	1.67494e+07	0	7.7674e+06	2.76194e+06	3.82496e+07	1.14719e+08	2.23749e+08	8.26221e+07	6.74759e+07	1.27349e+08	0	0	1.93409e+07	2.53157e+07	0	1.20902e+06
V41	HESI(+)	422.325	1.42	1.21	M+H	CAR(18:3)	CAR 18:3	10854132	7.62157e+06	9.88587e+06	9.39265e+06	9.53679e+06	7.30243e+06	8.98917e+06	1.46801e+07	1.08552e+07	1.24489e+07	1.61982e+07	4.92613e+06	6.68875e+06	2.60291e+07	8.10637e+06	9.21001e+06	6.40254e+06	5.52616e+06	3.65295e+06	6.3402e+06	6.81582e+06	5.0832e+06	5.42485e+06	9.0346e+06	6.35417e+06	5.88621e+06	5191848	5.28072e+06	6.26656e+06	9.30225e+06	3.83501e+06	3.97322e+06	8.21567e+06	3.27849e+06	1.14052e+06	1.60944e+06
V42	HESI(+)	424.342	1.56	1.37	M+H	CAR(18:2)	CAR 18:2	1.99053e+08	1.15814e+08	1.2739e+08	1.18895e+08	1.52013e+08	1.56992e+08	1.24488e+08	1.80279e+08	1.73193e+08	1.59009e+08	1.37986e+08	1.32963e+08	2.09278e+08	6.10689e+08	1.69397e+08	2.1469e+08	184108295	1.26899e+08	1.51837e+08	1.5193e+08	211000819	2.14103e+08	1.57729e+08	2.36794e+08	110662376	1.2232e+08	1.7919e+08	1.93491e+08	1.31998e+08	1.8054e+08	1.13522e+08	9.54896e+07	2.38452e+08	1.13056e+08	5.81839e+07	8.27274e+07
V43	HESI(+)	426.321	1.09	0.88	M+H	NAE(26:7)	NAE 26:7	6.50791e+07	2.86139e+07	4.44706e+07	3.16292e+07	7.01823e+06	2.7166e+07	2.17134e+06	2.9343e+06	1.03279e+06	7.25149e+06	3.32813e+06	2.43405e+06	220645	0	1170.29	303487	346.03	0	3.19617e+06	2.11567e+07	5.32858e+06	1.27007e+07	1.06523e+07	7.52536e+06	642388	1.62031e+06	3.21943e+06	2.25448e+06	2.82478e+06	543096	0	0	3231.43	400.698	0	272585
V44	HESI(+)	426.358	1.98	1.81	M+H	CAR(18:1)	CAR 18:1	9.09798e+06	1.62477e+07	1.99694e+07	2.07719e+07	9.2637e+06	4.47879e+06	2.3781e+07	2.06872e+07	1.3398e+07	4.15276e+07	2.28298e+07	1.55886e+07	9.1873e+07	2.23494e+08	7.35123e+07	9.87127e+07	8.73351e+07	2.97314e+07	1.06726e+07	2.69644e+07	1.11711e+07	4.971e+06	12779265	2.56892e+07	6.13602e+06	2.13898e+07	2.54219e+07	3.38741e+07	1.98093e+07	2.38444e+07	6.34946e+07	1.1572e+08	1.30334e+08	3.06803e+07	3.00275e+07	2.40426e+07
V45	HESI(+)	428.353	1.16	0.96	M+H	NAE(26:6)	NAE 26:6	3.87211e+07	2.74231e+07	6.6717e+06	3.90015e+06	3.20414e+07	3.42108e+07	2.09618e+07	1.26346e+07	1.26739e+07	1.24382e+07	1.44473e+07	1.50111e+07	4.53306e+06	3.17139e+06	1.80306e+06	1.13818e+06	1.01405e+06	1.79196e+07	3.48265e+07	36215561	3.60893e+07	2.71116e+07	3.80944e+07	2.42318e+07	3.70259e+07	2.44346e+07	1.73864e+07	4.54444e+07	2.75086e+07	1.89809e+07	1.5358e+06	2.34093e+06	3.6535e+06	2.75394e+06	435254	935150
V46	HESI(+)	428.374	2.12	1.96	M+H	CAR(18:0)	CAR 18:0	2.4907e+08	211097008	3.54704e+08	3.58414e+08	2.76863e+08	1.50507e+08	2.6054e+08	4.67943e+08	2.69616e+08	3.48987e+08	3.00687e+08	3.15296e+08	1103571921	3347361046	862187453	9.31565e+08	8.20741e+08	623210557	3.54006e+08	4.43314e+08	2.86588e+08	3.03831e+08	3.27534e+08	4.31708e+08	1.34062e+08	2.67485e+08	2.84429e+08	3.61306e+08	2.46015e+08	3.87545e+08	6.01619e+08	8.14537e+08	1125998514	773368054	4.45364e+08	8.44944e+08
V47	HESI(+)	429.373	5.67	4.77	M+Na	WE(O-11:0_16:2)	WE O-27:2	5.98435e+06	1.39636e+07	1.9458e+07	1.6919e+07	1.25457e+07	1.28711e+07	1.14561e+07	1.45719e+07	21261989	9.64955e+06	8.48139e+06	2.16266e+07	3.73197e+06	1.82012e+06	1.31315e+06	1.15073e+06	2.45341e+06	1.30558e+06	2.16096e+07	3.52617e+07	2.11202e+07	8.97459e+06	1.62129e+07	2.19837e+07	7.70454e+06	4.13775e+07	3.08547e+07	3.55111e+07	4.41221e+07	6.67487e+07	4.22723e+06	2.36338e+06	5.01553e+06	9.9476e+06	1.7167e+06	5.19288e+06
V48	HESI(+)	429.373	6.08	4.95	M+Na	WE(O-8:0_19:2)	WE O-27:2	1.25256e+06	4.38837e+06	2.57673e+07	6.11354e+06	4.67362e+06	4.65233e+06	1.09495e+06	2.87649e+06	1.96955e+06	473171	435370	4.38711e+06	145585	46796.9	62211.2	110210	77017.7	109375	5.8733e+06	5.7613e+06	3.52411e+06	3.41562e+06	4.09195e+06	7.9379e+06	204978	1.10519e+07	1.53041e+07	1.19742e+07	3.10009e+06	3.02196e+07	235426	261699	1.8194e+06	2.47082e+06	72254.6	236194
V49	HESI(+)	430.389	4.13	3.86	M+NH4	DG(P-6:0_16:0)	DG O-22:1	4.69199e+07	4.66793e+07	3.47023e+07	4.146e+07	4.28543e+07	2.46524e+07	6.63536e+07	6.07714e+07	5.61697e+07	6.02508e+07	5.29583e+07	4.17958e+07	4.55599e+07	5.60596e+07	4.81088e+07	4.31357e+07	4.20063e+07	3.92104e+07	6.01728e+07	5.95503e+07	5.35554e+07	7.0252e+07	4.84696e+07	6.12287e+07	7.6059e+07	8.34308e+07	8.74134e+07	8.70515e+07	8.77485e+07	8.83153e+07	7.31573e+07	7.59055e+07	7.98566e+07	1.13096e+08	8.01976e+07	9.29862e+07
V50	HESI(+)	431.314	5.6	4.74	M+Na	DG(P-5:0_17:2)	DG O-22:3	9.28894e+07	1.18088e+08	1.19243e+08	9.00273e+07	1.11082e+08	2.17771e+08	1.20076e+08	2.48344e+08	137557135	9.57389e+07	6.01209e+07	3.02198e+08	6.58418e+06	1615.7	0	1.36287e+07	673374	799417	2.5324e+08	3.73986e+08	2.77242e+08	3.12052e+08	501502580	1.90815e+08	3.76539e+07	2.54765e+08	327432715	2.19633e+08	6.10197e+08	2.33489e+08	27736.8	1262.71	0	2.86037e+06	0	0
V51	HESI(+)	431.384	2.73	2.6	M+Na	WE(O-11:0_16:1)	WE O-27:1	8.84885e+06	1.97484e+06	667984	2.64416e+06	853738	1.52704e+06	5.01704e+06	3.00312e+06	7.23968e+06	7.36759e+06	2.79231e+06	6.19229e+06	1.09563e+06	3.10933e+06	3.4293e+06	1.24434e+07	1.58251e+06	9.24801e+06	1.06871e+06	3.98103e+06	3.95614e+06	1.58213e+06	1.09822e+06	9.59368e+06	4.65262e+06	9.15239e+06	1.35903e+06	3.01043e+06	8.00843e+06	3.81723e+06	6.73354e+06	8.57108e+06	4.76832e+06	5.76705e+06	3.27171e+06	1.48565e+06
V52	HESI(+)	434.354	20.39	17.67	M+H	Cer(d14:3/13:1)	Cer 27:4	5.15449e+07	3.26826e+07	151850606	5.25246e+07	261654640	137399346	1.31925e+08	1.38227e+08	8.20229e+07	1.45058e+08	2.55253e+08	8.109e+07	1.9782e+08	3.09659e+08	7.86151e+07	4.80502e+07	1.25375e+08	2.97474e+08	3.26132e+08	4.79326e+08	1.37098e+08	2.21198e+08	3.14818e+07	2.11864e+08	6.65468e+07	2.09515e+08	1.59765e+08	6.25285e+07	1.07288e+08	1.46446e+08	5.33801e+08	7.92434e+07	109455904	4.04906e+07	5.10598e+07	7.80339e+07
V53	HESI(+)	436.282	1.81	1.63	M+H	LPC(P-13:1)	LPC O-13:2	5.88812e+07	5.66888e+07	3.4062e+07	4.0814e+07	6.88936e+07	5.93442e+07	3.1177e+07	1.74146e+07	3.61281e+07	2.54345e+07	2.25114e+07	1.43101e+07	1.95552e+07	2.52474e+07	3.48536e+07	2.93177e+07	3.27054e+07	2.47415e+07	4.2229e+07	5.31577e+07	4.15446e+07	4.25351e+07	4.14657e+07	4.06248e+07	5.59218e+07	1.96132e+07	2.58933e+07	2.14611e+07	2.43521e+07	9.9429e+06	3.14582e+07	2.89094e+07	2.01763e+07	4.24685e+07	3.18071e+07	2.06599e+07
V54	HESI(+)	437.323	4.09	3.82	M+Na	DG(10:0_11:0)	DG 21:0	8.59735e+06	7.70806e+06	9.64807e+06	2.62358e+07	9.79701e+06	6.52265e+06	3.03315e+07	8.26206e+06	1.72094e+06	1.92871e+06	2.96849e+06	1.30911e+07	1.08978e+06	149342	231205	958683	274075	289333	6.54605e+06	1.25561e+07	9.16912e+06	7.79094e+06	7.96324e+07	5.82133e+06	677725	1.38912e+07	2.29745e+07	1.75191e+07	2.91261e+07	1.81761e+07	128310	72973.1	102285	1.15132e+06	54141.2	99109.9
V55	HESI(+)	439.303	2.42	2.28	M+H	TG(18:2_2:0_2:0)	TG 22:2	1.56382e+06	930620	1.33066e+06	2.89987e+06	1.43678e+06	1.49083e+06	3.65634e+06	2.81064e+06	1.90176e+06	983590	728789	2.92044e+06	541871	351593	22317.8	1.42731e+06	91995.6	81661	271536	1.2979e+06	626274	1.25776e+06	2.69067e+06	550427	370563	7.62641e+06	4.579e+06	3.05885e+06	8.64477e+06	1.23164e+06	7802.77	53991.4	43116.1	172237	43148.2	33580.7
V56	HESI(+)	439.305	2.87	2.74	M+H	TG(17:2_2:0_3:0)	TG 22:2	1.24617e+06	5.74575e+06	4.87499e+06	4.20437e+06	1.1137e+06	6.10069e+06	7.17651e+06	5.97614e+06	2.77567e+06	1.99049e+06	79250.9	1.10692e+07	155955	394790	381200	576664	148008	274052	4.37637e+06	5.72006e+06	4.63998e+06	3.23913e+06	9.11955e+06	3.13434e+06	359338	1.60787e+07	2.08316e+07	8.54178e+06	2.64044e+07	5.88038e+06	353049	373324	4.95421e+06	5.04939e+06	459169	229650
V57	HESI(+)	440.337	3.32	3.17	M+NH4	TG(P-14:2_2:0_6:0)	TG O-22:3	5.24396e+06	9.39891e+06	1.14866e+07	8.27386e+06	5.77339e+06	1.66705e+07	9.89283e+06	1.1999e+07	5.99431e+06	4.27552e+06	1.96652e+06	1.90341e+07	1.76189e+06	191658	602016	3.35622e+06	0	515299	1.57662e+07	3.14121e+07	2.11132e+07	1.69322e+07	3.5485e+07	1.24286e+07	2.31621e+06	4.01984e+07	5.23683e+07	3.55181e+07	5.52353e+07	2.93663e+07	210408	0	76830.3	3.73376e+06	0	0
V58	HESI(+)	440.374	2.04	1.87	M+H	CAR(19:1)	CAR 19:1	85971.6	320598	2.26823e+06	2.8052e+06	2.35325e+06	368066	352698	592828	952319	1.21706e+06	442584	3.14448e+06	2.16701e+06	4.36966e+06	662355	5.26512e+06	4.87033e+06	876420	886482	233877	400592	1.44613e+06	1.19233e+06	338596	682827	485039	258577	419238	1.28898e+06	1.02559e+06	945280	581761	1.40374e+06	1.2774e+06	625090	772446
V59	HESI(+)	444.383	3.52	3.35	M+NH4	WE(O-9:1_20:5)	WE O-29:6	4.8405e+06	981719	3.69728e+06	5.91089e+06	1.9318e+06	1.40306e+06	6.44738e+06	1.21693e+07	7.0426e+06	3.36396e+06	3.67401e+06	7.58406e+06	1.85559e+07	1.84839e+07	1.55151e+07	1.79379e+07	1.3085e+07	1.25669e+07	3.60238e+06	8.52493e+06	1.53318e+06	8.395e+06	1.58634e+06	951423	6.94716e+06	1.28415e+06	5.56722e+06	4.87717e+06	3.78884e+06	6.76045e+06	1.18783e+07	1.49922e+07	2.08516e+07	1.5372e+07	1.35056e+07	1.36679e+07
V60	HESI(+)	446.328	1.47	1.27	M+H	CAR(20:5)	CAR 20:5	6.05257e+06	5.38109e+06	4.91083e+06	4.37063e+06	6.05439e+06	4.30356e+06	1.63808e+07	2.16768e+07	3.54993e+07	4.46984e+07	3.46723e+07	4.04593e+07	4.57889e+07	2.9251e+07	1.43881e+07	4.08422e+07	1.83421e+07	3.52165e+07	9.02635e+06	1.51719e+07	7.70274e+06	8.40987e+06	1.05186e+07	5.14533e+06	3.40174e+06	2.17816e+07	2.73647e+07	4.60279e+07	3.29812e+07	2.66287e+07	2.10076e+07	2.5483e+07	2.95924e+07	2.20014e+07	12936529	2.40444e+07
V61	HESI(+)	447.309	3.24	3.1	M+Na	TG(P-18:1_2:0_2:0)	TG O-22:2	7.50619e+07	1.15537e+08	1.36682e+08	1.69214e+08	1.22573e+08	1.63103e+08	1.10039e+08	1.63805e+08	8.8013e+07	6.82294e+07	3.84255e+07	2.57074e+08	5.09685e+06	1.73524e+06	308893	6.89237e+06	520605	1.16156e+06	1.7957e+08	3.10245e+08	2.24198e+08	215562601	3.36583e+08	1.2186e+08	3.00401e+07	1.42215e+08	1.93184e+08	1.93957e+08	1083701341	2.91595e+08	812187	794261	812875	2.64178e+06	892546	428396
V62	HESI(+)	447.309	2.96	2.83	M+H	DG(22:5_2:0)	DG 24:5	1.20094e+08	217148194	1.73722e+08	1.14469e+08	9.33284e+07	2.89877e+08	2.69359e+08	248126605	1.05446e+08	1.2649e+08	5.53531e+07	279527454	4.09616e+07	7.41744e+06	1.70282e+07	5.31e+07	164017	8.24429e+06	1.78186e+08	4.36297e+08	2.29023e+08	2.03838e+08	3.55297e+08	1.93604e+08	6.23813e+07	5.90424e+08	6.93897e+08	5.32888e+08	5.85059e+08	253907136	5.85467e+06	2.07525e+06	5.2326e+06	7.35328e+07	4.69094e+06	217125
V63	HESI(+)	448.343	1.56	1.36	M+H	CAR(20:4)	CAR 20:4	1.88882e+08	1.27136e+08	1.92428e+08	2.24787e+08	1.42369e+08	1.45021e+08	2.19188e+08	4.77108e+08	2.77596e+08	336910383	1.91217e+08	2.83305e+08	6.27412e+08	1055906744	6.21747e+08	641210257	6.87873e+08	5.7753e+08	3.10903e+08	2.42288e+08	3.93378e+08	4.5399e+08	2.35654e+08	2.82826e+08	125669872	285474280	399937801	4.82801e+08	326159274	5.72743e+08	5.56332e+08	6.55098e+08	1004153740	4.56787e+08	3.97929e+08	628189223
V64	HESI(+)	450.358	1.66	1.47	M+H	CAR(20:3)	CAR 20:3	5.00758e+07	3.02324e+07	4.10612e+07	5.03438e+07	4.00641e+07	3.81498e+07	4.20441e+07	3.17727e+07	4.85576e+07	4.96166e+07	4.3893e+07	4.02502e+07	8.15886e+07	1.28477e+08	7.96645e+07	6.06528e+07	8.54817e+07	8.35157e+07	2.5249e+07	2.81123e+07	6.65881e+07	3.63398e+07	2.05968e+07	4.21707e+07	3.25691e+07	4.48782e+07	4.12625e+07	6.37394e+07	6.34184e+07	3.26018e+07	9.88547e+07	6.68025e+07	1.68577e+08	9.36266e+07	4.23633e+07	8.41093e+07
V65	HESI(+)	451.351	4.09	3.83	M+Na	WE(O-9:0_20:5)	WE O-29:5	3.66187e+07	3.3918e+07	1.51168e+07	4.08015e+07	3.07681e+07	4.2141e+07	4.38697e+07	4.80171e+07	3.47335e+07	3.4408e+07	3.69282e+07	6.50934e+07	1.07348e+07	2.32181e+07	4.26718e+06	2.68963e+07	1.09921e+07	7.5418e+06	4.43123e+07	9.70752e+07	5.78342e+07	5.19795e+07	9.32291e+07	5.27103e+07	2.7719e+07	4.46303e+07	3.92803e+07	4.0311e+07	4.885e+07	3.36071e+07	1.08475e+07	2.88704e+07	2.33876e+07	2.13151e+07	4.30999e+06	3.17763e+07
V66	HESI(+)	452.278	1.56	1.37	M+H	LPE(16:1)	LPE 16:1	6.45832e+07	8.26504e+07	1.01567e+08	1.33406e+08	1.36612e+08	6.584e+07	3.78271e+07	1.02768e+07	3.43956e+07	2.37323e+07	4.1201e+07	2.27899e+07	0	7.19693e+06	1.71344e+07	6.56412e+06	1.29085e+07	1.07297e+07	3.68679e+07	3.57696e+07	8.19486e+07	4.27693e+07	3.49224e+07	2.62918e+07	4.6275e+07	1.30582e+07	6.57394e+06	3.7076e+06	2.08545e+07	2.49779e+07	9.76787e+06	8.31676e+06	8.58359e+06	2.28713e+07	3.06513e+07	1.09523e+07
V67	HESI(+)	452.374	3.64	3.46	M+NH4	DG(P-5:0_19:3)	DG O-24:4	1.73526e+07	3.57183e+07	2.99973e+07	2.48767e+07	2.44406e+07	5.507e+07	4.44508e+07	4.53954e+07	2.36066e+07	1.61972e+07	1.04047e+07	6.08376e+07	5.84363e+06	1.98426e+06	2.36329e+06	7.14146e+06	261754	2.18596e+06	3.80088e+07	6.61838e+07	4.05921e+07	3.34999e+07	8.7953e+07	2.91868e+07	1.09689e+07	1.23488e+08	1.5295e+08	9.26488e+07	1.92031e+08	4.24733e+07	1.723e+06	1.6985e+06	2.46333e+06	9.35225e+06	2.28935e+06	502184
V68	HESI(+)	452.374	2.09	1.93	M+H	CAR(20:2)	CAR 20:2	2.18902e+06	2.62768e+06	5.89649e+06	4.54495e+06	4.70259e+06	942752	5.44038e+06	1.22967e+07	2.82397e+06	7.48224e+06	1.3091e+07	7.87324e+06	5.84133e+07	1.08099e+08	2.99154e+07	3.20782e+07	3.44248e+07	2.47592e+07	0	2.53002e+06	585031	1.05568e+06	0	2.8336e+06	2.97651e+06	7.40351e+06	4.18562e+06	7.65744e+06	1.15148e+06	1.93453e+06	4.21325e+07	6.49689e+07	1.54657e+08	3.55132e+07	2.55643e+07	2.22441e+07
V69	HESI(+)	452.374	3.71	3.52	M+NH4	DG(O-5:0_19:4)	DG O-24:4	3.83528e+06	6.22022e+06	6.37367e+06	4.52476e+06	5.66965e+06	1.49153e+07	8.4589e+06	9.67651e+06	5.87506e+06	3.53294e+06	2.58188e+06	1.22304e+07	1.57463e+06	2.22393e+06	698713	2.11665e+06	1.37259e+06	2.44999e+06	1.08363e+07	1.51694e+07	1.02257e+07	6.53437e+06	1.74127e+07	6.36591e+06	2.35296e+06	2.31125e+07	3.22153e+07	2.40198e+07	3.30479e+07	9.2594e+06	1.93111e+06	1.90365e+06	2.73737e+06	3.20742e+06	2.56586e+06	2.85399e+06
V70	HESI(+)	454.293	2.13	1.97	M+H	LPE(16:0)	LPE 16:0	2.17394e+07	2.68139e+07	3.47497e+07	4.02329e+07	4.76565e+07	2.10757e+07	7.63309e+06	4.48704e+06	1.71225e+07	2.59446e+07	2.12027e+07	1.70969e+07	5.38338e+06	7.65036e+06	1.91127e+07	1.41793e+07	1.79842e+07	1.02998e+07	2.58354e+07	1.42376e+07	1.55939e+07	1.22372e+07	1.82331e+07	1.53143e+07	1.93689e+07	4.66059e+06	1.04214e+07	5.99265e+06	1.56482e+07	8.27606e+06	5.10588e+06	1.45641e+07	7.48791e+06	1.55365e+07	2.06481e+07	1.74998e+07
V71	HESI(+)	454.294	1.81	1.63	M+H	LPE(16:0)-2	LPE 16:0	1645559288	1580951699	987341717	1296587911	1739518636	1427765698	8.19394e+08	5.87435e+08	8.56144e+08	7.88496e+08	8.51147e+08	5.9568e+08	6.3933e+08	6.93687e+08	8.23577e+08	7.91779e+08	1013017903	6.40699e+08	1014193668	1449260349	1287488193	1163344280	1295094247	1156945109	1455329269	6.62153e+08	7.96454e+08	5.79751e+08	7.47851e+08	4.30551e+08	9.7371e+08	7.43332e+08	7.39171e+08	1028006764	1022394714	6.30792e+08
V72	HESI(+)	454.388	2.22	2.07	M+H	CAR(20:1)	CAR 20:1	1.04892e+07	5.80148e+06	5.79564e+07	6.09132e+07	3.62702e+07	2.04328e+06	6.36391e+07	8.45174e+07	4.15135e+07	4.62591e+07	5.25077e+07	5.47665e+07	2.34422e+08	8.02163e+08	1.06647e+08	1.18173e+08	1.32065e+08	1.05808e+08	0	4.29675e+07	2.11122e+06	4.51125e+06	4.05129e+06	1.37344e+07	3.01002e+06	2.84431e+07	2.78557e+07	3.40471e+07	2.758e+07	6.02741e+06	1.23323e+08	1.10804e+08	4.12889e+08	1.38952e+08	1.55849e+08	1.96099e+08
V73	HESI(+)	456.406	2.76	2.63	M+H	CAR(20:0)	CAR 20:0	1.05076e+08	9.2502e+07	1.03834e+08	8.75013e+07	7.69396e+07	1.67166e+07	3.96609e+07	1.75367e+07	8.97215e+06	1.51253e+07	2.51161e+07	2.29046e+07	1.43907e+08	212807055	8.13618e+07	6.23764e+07	6.80312e+07	5.79249e+07	2.23736e+07	3.10324e+07	7.9869e+06	8.96934e+06	1.71608e+07	40027639	2.69089e+07	1.24804e+07	1.41169e+07	1.76489e+07	9.38766e+06	2.19206e+07	7.37259e+07	6.82847e+07	1.40116e+08	6.32379e+07	4.50284e+07	2.48117e+08
V74	HESI(+)	457.328	3.71	3.52	M+Na	DG(P-5:0_19:3)	DG O-24:4	2.96222e+06	5.05416e+06	2.70696e+07	4.2265e+06	4.85178e+06	9.96251e+06	6.26349e+06	6.5857e+06	4.74111e+06	3.01211e+06	2.33959e+06	9.21196e+06	1.15148e+06	256981	1.45466e+06	1.44772e+06	482839	859153	8.38593e+06	1.13088e+07	8.40295e+06	4.69295e+06	1.32425e+07	4.75657e+06	1.53943e+06	1.34825e+07	1.94131e+07	1.68355e+07	1.90042e+07	5.94116e+06	1.54142e+06	158783	1.3862e+06	1.48129e+06	303185	374681
V75	HESI(+)	458.363	1.43	1.22	M+NH4	MG(O-26:8)	MG O-26:8	8.81527e+06	9.12675e+06	3.47683e+06	2.63138e+06	6.966e+06	8.91424e+06	3.8597e+06	5.3911e+06	4.37392e+06	5.03841e+06	6.97704e+06	6.29709e+06	9.12557e+06	5.48728e+06	3.37556e+06	3.09403e+06	4.85846e+06	8.80203e+06	1.56931e+07	3.56063e+07	1.5079e+07	1.8718e+07	1.50162e+07	1.13185e+07	9.16772e+06	1.59576e+07	1.20583e+07	2.53287e+07	1.56753e+07	9.73032e+06	1.4074e+07	9.62108e+06	9.06031e+06	1.43722e+07	6.16101e+06	8.03046e+06
V76	HESI(+)	458.399	4.17	3.88	M+NH4	WE(O-10:1_20:5)	WE O-30:6	0	6883.12	144615	103211	86740.5	0	0	43741.7	193682	27588.2	253536	744616	6.06749e+06	6.66856e+06	1.19982e+07	1.16625e+07	2.08498e+07	1.33446e+07	677723	201514	274734	21881.4	246272	182955	171821	746434	509506	750756	144981	12186.1	2.25982e+07	2.52982e+07	1.55217e+07	3.95038e+07	1.14512e+07	3.74048e+06
V77	HESI(+)	458.42	5.38	4.63	M+NH4	DG(P-6:0_18:0)	DG O-24:1	3.24841e+07	2.09306e+07	1.91153e+07	1.90622e+07	2.38714e+07	1.23809e+07	4.73618e+07	4.39328e+07	2.76309e+07	4.01769e+07	3.82319e+07	2.08968e+07	3.60949e+07	2.73268e+07	2.41433e+07	2.28878e+07	2.24128e+07	2.81533e+07	3.90812e+07	3.83292e+07	3.58283e+07	4.10436e+07	2.31754e+07	4.69596e+07	5.04284e+07	5.59328e+07	5.82658e+07	6.4046e+07	5.4676e+07	6.58402e+07	5.56612e+07	5.36249e+07	5.78708e+07	8.65476e+07	6.39915e+07	7.52093e+07
V78	HESI(+)	459.345	4.27	3.96	M+Na	DG(P-5:0_19:2)	DG O-24:3	4.31743e+07	6.24904e+07	3.31458e+07	3.99726e+07	3.04843e+07	74076870	7.44896e+07	1.01808e+08	5.15675e+07	4.16633e+07	2.49257e+07	9.57407e+07	9.44275e+06	3.308e+06	4.91057e+06	1.69737e+07	5.80169e+06	1.57445e+06	6.58278e+07	9.33822e+07	5.54519e+07	4.17673e+07	8.52955e+07	5.05461e+07	1.79362e+07	8.94603e+07	1.06132e+08	7.59346e+07	1.98559e+08	4.92908e+07	1.53483e+06	5.26075e+06	1.67749e+06	1.24524e+07	1.64206e+06	1.65812e+06
V79	HESI(+)	460.379	1.31	1.11	M+H	Cer(d11:0/18:5)	Cer 29:5	2.1983e+07	1.88775e+07	7.1808e+06	5.80601e+06	1.67089e+07	2.04854e+07	1.26236e+07	1.37678e+07	1.30564e+07	1.16791e+07	1.34854e+07	16017282	7.07035e+06	2.38853e+06	4.14237e+06	2.42257e+06	661207	1.46081e+07	2.85104e+07	4.37781e+07	2.84069e+07	2.24469e+07	2.70242e+07	2.09882e+07	1.39945e+07	1.7381e+07	1.17465e+07	2.76057e+07	1.87586e+07	2.14643e+07	1.0429e+06	3.94458e+06	2.22054e+06	5.65626e+06	2.62989e+06	2.9089e+06
V80	HESI(+)	460.379	1.11	0.91	M+NH4	MG(O-26:7)	MG O-26:7	5.20039e+07	4.19122e+07	2.47235e+07	1.80963e+07	4.18566e+07	4.08271e+07	2.61477e+07	2.87572e+07	2.68877e+07	2.2192e+07	2.68208e+07	3.93621e+07	2.44879e+07	1.42567e+07	8.10884e+06	6.49584e+06	5.97601e+06	3.74018e+07	5.27374e+07	7.87436e+07	7.92069e+07	5.72338e+07	5.53682e+07	5.82912e+07	5.13738e+07	5.24278e+07	5.02439e+07	7.52714e+07	5.74875e+07	6.16329e+07	1.9838e+07	2.74413e+07	2.2093e+07	3.00547e+07	1.70997e+07	1.80031e+07
V81	HESI(+)	461.289	2.62	2.48	M+H	TG(20:5_2:0_2:0)	TG 24:5	8.27936e+06	1.7787e+07	2.41158e+07	1.52231e+07	2.70442e+07	2.27378e+07	3.11415e+07	3.21468e+07	2.40973e+07	1.93732e+07	1.96943e+07	6.05956e+07	4.56938e+06	4.18986e+06	4.59397e+06	8.86581e+06	5.22397e+06	4.74605e+06	3.26529e+07	6.70069e+07	3.35447e+07	2.67702e+07	7.2524e+07	3.68702e+07	1.13264e+07	5.41256e+07	6.56165e+07	4.76281e+07	1.73482e+08	3.64455e+07	3.34983e+06	4.41022e+06	2.31324e+06	3.58524e+06	2.56441e+06	3.86861e+06
V82	HESI(+)	462.394	1.37	1.16	M+H	Cer(d11:0/18:4)	Cer 29:4	3.13443e+06	3.01945e+06	1.28675e+06	321273	2.3244e+06	3.69977e+06	1.94326e+06	745820	408116	831274	2.21591e+06	1.40567e+06	1.14441e+06	1.21639e+06	236753	413167	0	2.67248e+06	3.86248e+06	6.30406e+06	4.78256e+06	5.44584e+06	3.67842e+06	3.35084e+06	5.23706e+06	4.12788e+06	5.06818e+06	6.5501e+06	3.5607e+06	2.20634e+06	586252	1.18784e+06	636916	2.67289e+06	825335	21285.9
V83	HESI(+)	463.377	5.29	4.59	M+Na	DG(P-4:0_20:0)	DG O-24:1	1.01623e+06	2.05424e+06	2.46159e+06	798720	1.80971e+06	3.20195e+06	1.87671e+06	3.78707e+06	3.73971e+06	1.88748e+06	1.34546e+06	5.47095e+06	336622	212571	78014.2	257289	649791	281535	6.96816e+06	1.20654e+07	8.14566e+06	4.48999e+06	8.21169e+06	1.05448e+07	1.66828e+06	1.05799e+07	1.22123e+07	7.66144e+06	1.25577e+07	3.78851e+06	320998	599006	1.18233e+06	2.12371e+06	84721.5	643169
V84	HESI(+)	463.379	4.48	4.11	M+H	DG(O-6:0_20:4)	DG O-26:4	7.76053e+06	1.27096e+07	1.85214e+07	1.35342e+07	1.50307e+07	1.48743e+07	1.02868e+07	1.38778e+07	1.22436e+07	6.93164e+06	5.31773e+06	1.56873e+07	785312	1.0743e+06	0	1.61999e+06	1.82514e+06	256549	1.64327e+07	3.87698e+07	1.773e+07	9.85237e+06	2.27243e+07	1.87409e+07	5.98297e+06	5.73291e+07	6.48115e+07	3.73869e+07	7.55129e+07	2.30384e+07	1.79891e+06	897476	1.79186e+06	1.88057e+06	0	1.39716e+06
V85	HESI(+)	464.315	2.3	2.15	M+H	LPC(O-15:2)	LPC O-15:2	6.59622e+07	8.39005e+07	6.63286e+07	6.66266e+07	9.28915e+07	8.59782e+07	7.87441e+07	3.75882e+07	68915749	8.48101e+07	1.02877e+08	6.63717e+07	1.03165e+08	8.24957e+07	9.52645e+07	9.71314e+07	1.33761e+08	9.37534e+07	7.35251e+07	7.96994e+07	7.01194e+07	5.66057e+07	8.52912e+07	8.42166e+07	9.95576e+07	3.74988e+07	5.26916e+07	4.37958e+07	5.25093e+07	1.51285e+07	9.57771e+07	6.56088e+07	7.91877e+07	8.72697e+07	7.60933e+07	7.45376e+07
V86	HESI(+)	464.315	2.11	1.95	M+H	LPC(P-15:1)-2	LPC O-15:2	1.33146e+07	1.45635e+07	4.80904e+07	4.42202e+07	5.28063e+07	6.21749e+06	2.54962e+07	2.09201e+07	5.24302e+07	4.32204e+07	1.23857e+08	3.22308e+07	3.21221e+07	4.15344e+07	7.55781e+07	4.33468e+07	5.75211e+07	4.02509e+07	1.9881e+07	2.4577e+07	1.11378e+07	1.00224e+07	2.98454e+07	3.38278e+07	5.28765e+07	1.01389e+07	1.04597e+07	1.05842e+07	1.25078e+07	1.79883e+07	3.53127e+07	6.09604e+07	2.62098e+07	3.93291e+07	4.49616e+07	3.55823e+07
V87	HESI(+)	465.32	2.39	2.24	M+H	TG(20:3_2:0_2:0)	TG 24:3	2.48703e+06	1.09719e+07	1.92411e+07	2.775e+07	1.07813e+07	6.74644e+06	7.39106e+07	2.95308e+07	3.67662e+06	5.9418e+06	4.27428e+06	6.6711e+07	7.63714e+06	2.52657e+06	2.25978e+06	5.96185e+06	2.08819e+06	2.37522e+06	2.50276e+07	4.66607e+07	2.39897e+07	6.04838e+06	6.3557e+07	6.52766e+06	3.64728e+06	1.22329e+08	1.4155e+08	4.14488e+07	1.46893e+08	12034331	2.64462e+06	2.28494e+06	1.47653e+06	6.87888e+06	1.43283e+06	510357
V88	HESI(+)	465.32	2.67	2.54	M+Na	TG(13:0_4:0_5:0)	TG 22:0	4.90048e+06	2.00645e+07	2.06384e+07	1.99721e+07	1.29165e+07	1.77014e+07	3.27704e+07	2.89051e+07	9.03653e+06	1.25295e+07	6.95441e+06	6.16124e+07	4.93251e+06	472482	1.00686e+06	5.46743e+06	1.04189e+06	1.12422e+06	2.0327e+07	2.94422e+07	2.82224e+07	1.82731e+07	6.97364e+07	1.37799e+07	4.87106e+06	8.37527e+07	9.24691e+07	3.55477e+07	1.49172e+08	1.66764e+07	319749	256561	437136	8.07769e+06	426674	289348
V89	HESI(+)	466.176	1.41	1.2	M+H	LPC(14:1)	LPC 14:1	1.46929e+07	6.20682e+06	2.6037e+06	3.64388e+06	4.80196e+06	8.06586e+06	4.72658e+06	9.33559e+06	1.82596e+07	1.48092e+07	8.85864e+06	6.21088e+06	2.99823e+06	4.38217e+06	4.63117e+06	7.59404e+06	3.75561e+06	5.47503e+06	4.18392e+07	3.86753e+07	3.72936e+07	4.80461e+07	2.15348e+07	2.843e+07	1.47284e+07	2.02779e+06	2.83414e+06	9.33351e+06	1.51443e+07	1.50303e+07	7.61197e+06	8.89853e+06	1.07091e+07	1.85355e+07	6.62191e+06	1.06312e+07
V90	HESI(+)	466.293	1.33	1.12	M+H	LPC(14:1)	LPC 14:1	5.0571e+06	1.44246e+07	3.91206e+07	3.09576e+07	3.0826e+07	6.88163e+06	1.08311e+07	2.02001e+07	1.93039e+07	2.08958e+07	2.08272e+07	1.23932e+07	2.17148e+06	9.42706e+06	4.00856e+06	3.82436e+06	593136	3.73228e+06	1.49835e+07	1.7049e+07	7.3875e+06	7.81535e+06	2.19208e+07	1.26077e+07	1.00004e+07	8.5417e+06	5.54296e+06	5.31977e+06	7.97118e+06	6.44819e+06	53687.7	498684	1.29073e+06	898852	636882	456751
V91	HESI(+)	466.329	2.59	2.46	M+H	LPC(P-15:0)	LPC O-15:1	1.53395e+07	1.40595e+07	1.8544e+07	2.08764e+07	3.3702e+07	8.23373e+06	1.28776e+07	1.40448e+07	1.49328e+07	1.18302e+07	3.12456e+07	1.2376e+07	4.55717e+06	1.05191e+07	1.30418e+07	9.08322e+06	9.54638e+06	7.61068e+06	1.72129e+07	2.42155e+07	1.43857e+07	8.012e+06	2.79428e+07	2.59265e+07	1.38468e+07	1.94914e+06	972166	2.14898e+06	3.13455e+06	5.91464e+06	8.68899e+06	9.98011e+06	4.57691e+06	1.35939e+07	1.21044e+07	7.11435e+06
V92	HESI(+)	466.388	2.29	2.14	M+H	CAR(21:2)	CAR 21:2	0	0	2.81827e+06	8693232	1.2511e+06	1.93416e+06	0	0	0	0	0	0	3.10307e+07	6.20274e+06	0	6.59502e+06	7.20262e+06	1.34215e+07	0	5.84788e+06	1.16738e+06	3.67778e+06	1.93669e+06	4.45958e+06	0	9.64033e+06	9.90343e+06	1.29098e+07	0	9098.37	7.34047e+07	3.73529e+07	5.43978e+07	2.21507e+07	1.54862e+07	2.73317e+07
V93	HESI(+)	468.307	1.82	1.64	M+H	LPC(14:0)	LPC 14:0	2.72895e+06	8.97693e+06	0	8.48144e+06	2.94902e+06	4.11175e+06	7.04838e+06	3.38619e+06	0	2.77912e+06	4.37716e+06	0	293938	5.12176e+06	1.12027e+06	2.84444e+06	0	78572.5	1.09825e+06	0	4.7578e+06	4.43647e+06	5.513e+06	2.25193e+06	5.08587e+06	1.63048e+06	0	0	0	1.95021e+06	3.63913e+06	0	52157	2.78237e+06	6.11931e+06	1.67796e+06
V94	HESI(+)	468.309	1.45	1.25	M+H	LPE(14:0)	LPE 14:0	2.39695e+08	3.42983e+08	1074827125	7.75196e+08	5.57796e+08	342565997	2.63989e+08	1.13564e+08	2.39621e+08	2.36046e+08	526887147	2.08392e+08	8.38269e+07	9.29831e+07	1.16518e+08	8.32154e+07	5.58991e+07	1.24491e+08	2.28439e+08	222348019	3.11994e+08	2.23503e+08	3.32431e+08	1.82853e+08	3.74818e+08	1.71703e+08	1.04246e+08	1.33148e+08	2.75931e+08	2.30142e+08	6.33648e+07	100662684	5.94706e+07	1.27333e+08	1.78445e+08	1.27662e+08
V95	HESI(+)	468.309	2.01	1.85	M+H	LPE(17:0)	LPE 17:0	8.76078e+07	7.89186e+07	9.12375e+07	9.93779e+07	1.74378e+08	7.06795e+07	3.42446e+07	1.81571e+07	3.98988e+07	4.3206e+07	6.63572e+07	3.30711e+07	2.59816e+07	2.64983e+07	2.43587e+07	2.38861e+07	1.68934e+07	2.19666e+07	4.60922e+07	5.67194e+07	4.53349e+07	4.85127e+07	7.52458e+07	5.63213e+07	42538636	1.99407e+07	2.55252e+07	1.69818e+07	2.78374e+07	1.35179e+07	1.92439e+07	1.58844e+07	1.76149e+07	2.73548e+07	2.22561e+07	8.11425e+06
V96	HESI(+)	468.405	2.85	2.72	M+H	CAR(21:1)	CAR 21:1	87907.4	657478	764860	857229	1.44358e+06	4.49274e+06	52038.1	20816.9	23828.1	400968	498192	902316	3.41427e+06	218391	1.0179e+06	1.03594e+06	1.24663e+06	1.55867e+06	595760	3.17669e+06	1.23152e+06	1.85011e+06	1.11923e+06	1.47227e+06	748521	1.4625e+06	1.19938e+06	2.33367e+06	323244	149138	8.01882e+06	3.64603e+06	6.1513e+06	3.81706e+06	2.76567e+06	8.33701e+06
V97	HESI(+)	470.421	3.16	3.02	M+H	CAR(21:0)	CAR 21:0	2.99186e+07	2.20803e+07	2.11007e+07	6.63633e+06	3.03819e+07	536097	789872	199105	160929	872363	995213	1.41616e+06	2.37579e+06	1.89399e+06	1.75168e+06	1.80126e+06	1.16454e+06	2.23268e+06	1.33272e+06	1.68084e+06	525082	3.05252e+06	1.75821e+06	3.47028e+06	1.62344e+06	95552.7	216239	1.76316e+06	0	1.13719e+06	445089	252830	664883	1.22089e+06	179341	776949
V98	HESI(+)	471.2	1.04	0.83	M+Na	DG(12:2_12:2)	DG 24:4	2.05241e+06	1.17771e+06	3.8446e+06	2.35928e+06	3.80831e+06	5.26325e+06	2.73015e+06	1.78517e+06	1.31464e+06	1.69566e+06	2.6562e+06	3.07049e+06	505187	689634	272087	538478	185972	1.09353e+06	1.13457e+06	1.89229e+06	1.41065e+06	1.98185e+06	2.88331e+06	361786	5.14664e+06	6.04831e+06	4.18798e+06	2.84862e+06	4.39448e+06	3.70167e+06	526133	2.69465e+06	663119	505244	507944	16199.2
V99	HESI(+)	471.308	2.77	2.63	M+H	DG(24:7_2:0)	DG 26:7	1.43408e+06	2.73438e+06	3.88797e+06	4.06552e+06	2.79578e+06	3.61812e+06	2.35595e+06	4.52385e+06	1.82934e+06	830142	142164	7.9982e+06	0	0	82654.3	0	46956.3	67866.8	2.93411e+06	6.34236e+06	3.46723e+06	3.57823e+06	8.79179e+06	2.53547e+06	156895	2.3563e+06	4.75545e+06	3.341e+06	2.30819e+07	4.87353e+06	0	0	0	0	69477.6	41933.5
V100	HESI(+)	472.306	1.05	0.85	M+H	CAR(22:6)	CAR 22:6	485920	177745	791969	0	159311	572962	268986	207340	309168	560696	687115	280750	32864.6	0	43334.8	0	46046.2	93412.8	293716	124617	1.03891e+06	240082	139537	184777	740237	305053	527700	167179	87227	439488	94703.5	416738	47468.6	0	0	0
V101	HESI(+)	473.316	4.18	3.89	M+Na	DG(12:1_12:2)	DG 24:3	240069	190592	74640.3	169959	162990	345102	899512	92796.5	123956	195567	59994.1	1.00322e+06	0	96033.3	0	174870	0	43754.4	233008	1.15035e+06	528227	218539	997346	453318	168030	90019	2.10324e+06	1.2288e+06	2.02495e+06	523901	1.05179e+07	1.41958e+07	1.23546e+07	1.71981e+07	5.7063e+06	3.48364e+06
V102	HESI(+)	473.324	3.35	3.2	M+Na	TG(O-17:3_2:0_5:0)	TG O-24:3	3.8902e+06	1.63615e+06	6.6754e+06	5.14532e+06	5.68699e+06	2.12218e+06	2.57377e+06	2.78397e+06	1.30547e+06	1.16557e+06	524870	5.98899e+06	529637	131019	92668.3	685854	0	124556	6.80793e+06	3.52629e+06	6.14686e+06	1.82566e+07	4.2622e+06	1.53039e+06	1.5172e+06	3.72279e+06	1.44566e+07	3.27377e+07	2.61936e+07	1.13359e+07	77803.2	80052	18420.8	1.86818e+06	189763	68268.7
V103	HESI(+)	473.326	3.3	3.15	M+H	DG(24:6_2:0)	DG 26:6	3.41853e+06	5.23531e+06	4.56963e+06	4.16168e+06	5.65878e+06	9.67452e+06	8.11928e+06	9.47121e+06	5.04351e+06	3.23072e+06	2.36697e+06	1.05639e+07	2.14336e+06	195644	588879	3.0965e+06	0	123624	6.77033e+06	1.20522e+07	4.69333e+06	4.62055e+06	12941586	4.76578e+06	1.60762e+06	1.94271e+07	4.65314e+07	3.25072e+07	1.90797e+07	8.59554e+06	298408	79299.7	21654.4	1.85387e+06	187980	2016.02
V104	HESI(+)	474.358	1.15	0.94	M+H	CAR(22:5)	CAR 22:5	1.89492e+07	1.69958e+07	10452910	7.25594e+06	1.42318e+07	1.66724e+07	1.19177e+07	1.05601e+07	7.58819e+06	9.99762e+06	1.38241e+07	1.15909e+07	3.68773e+06	3.049e+06	1.09153e+06	621902	1.2294e+06	5.73941e+06	1.74603e+07	3.3801e+07	2.14054e+07	1.85057e+07	2.20426e+07	1.53101e+07	1.54717e+07	1.65208e+07	1.84636e+07	2.72114e+07	2.14446e+07	1.83025e+07	4.4199e+06	4.65581e+06	4.48717e+06	6.77506e+06	3.1624e+06	3.41315e+06
V105	HESI(+)	475.339	4.15	3.87	M+NH4	DG(12:0_12:2)	DG 24:2	5.31607e+06	6.60963e+06	4.6892e+06	5.44643e+06	4.74284e+06	6.76619e+06	8.20787e+06	1.59585e+07	6.15068e+06	5.7687e+06	3.23547e+06	1.45031e+07	2.0777e+07	786814	2.83781e+06	4.22605e+06	849157	361576	1.00085e+07	1.74308e+07	8.18452e+06	5.65257e+06	1.62554e+07	7.27699e+06	1.93035e+06	1.47156e+07	2.01404e+07	1.7709e+07	3.55412e+07	6.05391e+06	1.23575e+06	301194	706431	1.08755e+06	951894	1.80098e+06
V106	HESI(+)	475.339	4.34	4.01	M+Na	DG(22:2_2:0)	DG 24:2	7.44217e+06	1.0177e+07	9.49445e+06	1.07871e+07	5.80194e+06	1.14082e+07	1.11601e+07	1.80133e+07	6.48058e+06	4.25409e+06	2.87663e+06	1.77569e+07	248925	1.29835e+06	788870	809956	470746	707139	1.60182e+07	2.61805e+07	1.56291e+07	1.35312e+07	2.35672e+07	1.10009e+07	1.60395e+06	1.1533e+07	1.40257e+07	1.06847e+07	5.88372e+07	2.22847e+07	3.90838e+06	3.2124e+06	2.54715e+06	3.252e+06	1.21973e+06	2.78596e+06
V107	HESI(+)	476.274	1.83	1.65	M+Na	LPC(13:0)	LPC 13:0	3.8208e+08	4.08707e+08	1.31547e+08	1.5242e+08	310491180	4.10794e+08	6.55421e+07	1.10869e+08	1.2866e+08	9.45547e+07	5.48871e+07	9.80269e+07	137662852	1.45709e+08	1.49196e+08	2.04647e+08	3.38846e+08	1.17635e+08	3.2373e+08	3.26706e+08	3.63959e+08	3.08216e+08	3.16344e+08	3.29559e+08	2.26941e+08	1.30437e+08	1.89765e+08	1.41138e+08	1.23558e+08	1.0727e+08	2.34455e+08	171373455	1.85471e+08	2.67419e+08	1.84124e+08	1.68086e+08
V108	HESI(+)	476.276	1.43	1.23	M+H	LPE(18:3)	LPE 18:3	4.28579e+07	4.05376e+07	3.2111e+07	3.82559e+07	5.78513e+07	3.74556e+07	1.08851e+07	1.01337e+07	1.35317e+07	2.06305e+07	1.48701e+07	9.33089e+06	4.63892e+06	3.8922e+06	3.6754e+06	3.07231e+06	3.05936e+06	3.16115e+06	1.82091e+07	2.00677e+07	2.78536e+07	2.23918e+07	3.05e+07	1.95633e+07	1.10733e+07	7.80441e+06	5.71255e+06	3.64349e+06	7.59029e+06	3.42238e+06	2.71036e+06	969628	1.2991e+06	2.00179e+06	2.55919e+06	264633
V109	HESI(+)	478.294	1.61	1.41	M+H	LPC(15:2)	LPC 15:2	7.39753e+08	7.04671e+08	4.46106e+08	5.16691e+08	9.19306e+08	5.89925e+08	3.24367e+08	262796872	3.54457e+08	3.69984e+08	3.43953e+08	2.57465e+08	154657704	311521662	1.98095e+08	1.51689e+08	1.60909e+08	1.46129e+08	5.00744e+08	6.32065e+08	539681457	4.75059e+08	5.88327e+08	592160620	4.50671e+08	2.41754e+08	2.51582e+08	1.67963e+08	2.37279e+08	1.2457e+08	145631295	1.10736e+08	1.34888e+08	1.81216e+08	1.84147e+08	91580451
V110	HESI(+)	478.329	1.75	1.57	M+H	LPC(P-16:1)	LPC O-16:2	1.87458e+08	2.20174e+08	2.01191e+08	2.10935e+08	2.53286e+08	1.75149e+08	2.05105e+08	1.9541e+08	2.15421e+08	2.13434e+08	196712872	2.10723e+08	2.21513e+08	2.07491e+08	2.34406e+08	2.0365e+08	1.66677e+08	1.93259e+08	1.61612e+08	2.27013e+08	180993175	1.66055e+08	2.52585e+08	1.77798e+08	1.91375e+08	1.75996e+08	1.956e+08	122904611	1.72267e+08	1.90397e+08	2.1313e+08	2.37668e+08	1.89718e+08	232784465	1.95043e+08	1.99009e+08
V111	HESI(+)	479.327	1.78	1.59	M+H	SM(d18:1_0:0)	SM 18:1	4.72517e+07	3.06298e+07	4.23937e+07	4.60693e+07	5.79124e+07	3.06269e+07	4.79835e+07	4.55615e+07	4.78234e+07	4.51235e+07	5.26041e+07	4.58736e+07	5.45681e+07	5.83056e+07	6.30714e+07	4.78208e+07	4.21331e+07	4.64163e+07	5.00728e+07	4.40129e+07	3.68918e+07	3.58669e+07	4.80189e+07	3.13114e+07	4.76715e+07	4.01337e+07	3.9667e+07	3.71503e+07	4.80835e+07	4.21557e+07	5.46978e+07	4.80238e+07	4.41932e+07	4.31713e+07	5.35451e+07	4.43261e+07
V112	HESI(+)	479.335	2.34	2.19	M+Na	TG(14:0_3:0_6:0)	TG 23:0	7.60919e+06	2.19701e+07	9.1608e+06	8.37633e+06	3.31901e+06	1.83881e+07	3.69107e+07	3.94349e+07	4.27051e+06	2.94179e+06	2.39049e+06	4.21469e+07	3.50428e+06	5808.02	1.25013e+06	6.42713e+06	20943.6	895948	1.02365e+07	3.69296e+07	2.44046e+07	1.49287e+07	5.95293e+07	1.1963e+07	2.38157e+06	7.23137e+07	9.93089e+07	4.55392e+07	1.16425e+08	5.25086e+06	817451	0	0	6.10023e+06	411857	23880.1
V113	HESI(+)	479.373	4.2	3.91	M+H	DG(24:3_2:0)	DG 26:3	1.92172e+06	2.64575e+06	2.09996e+06	1.54387e+06	2.83299e+06	6.03987e+06	1.96435e+06	3.39683e+06	3.39067e+06	1.6173e+06	914707	2.77123e+06	1.94195e+06	4.28945e+06	2.28353e+06	500528	1.146e+06	2.68661e+06	4.81144e+06	1.08633e+07	4.20052e+06	1.5083e+06	6.22881e+06	5.9081e+06	998981	9.86312e+06	8.9981e+06	6.85503e+06	8.38421e+06	2.71796e+06	2.61183e+06	1.84422e+06	3.11829e+06	558011	4.15414e+06	568964
V114	HESI(+)	479.375	4.13	3.85	M+H	TG(O-20:3_2:0_4:0)	TG O-26:3	9.33107e+06	1.67853e+07	1.74019e+07	1.20198e+07	1.7346e+07	2.65941e+07	1.22973e+07	2.0052e+07	2.2928e+07	9.66093e+06	5.0276e+06	1.97353e+07	1.41606e+06	286263	215396	962525	216085	175162	2.53755e+07	6.75774e+07	2.50469e+07	1.3279e+07	3.89671e+07	4.43421e+07	9.11633e+06	7.24167e+07	7.66222e+07	4.79718e+07	6.58299e+07	2.02862e+07	358545	280270	3.30423e+06	4.2039e+06	183377	405756
V115	HESI(+)	480.309	1.91	1.73	M+H	LPE(18:1)	LPE 18:1	1956973616	1848940780	2803945764	3348593501	3267088103	1408123420	2538500747	1394976265	2531406819	2645858757	3430702316	2106428918	1790123994	2096767730	1916044081	1993780703	1568271236	1678619298	1824126546	2268732642	1845836353	1541374232	2255003689	2045982451	2124805483	1418024896	1424375603	9.1748e+08	1673537504	7.78776e+08	1401919636	1477934787	1552918452	1785375125	2945877894	1628787863
V116	HESI(+)	480.344	1.67	1.48	M+H	LPC(O-16:1)	LPC O-16:1	1.85254e+06	180492	9.47041e+06	8.6982e+06	1.53972e+07	5.99288e+06	980928	1.35502e+06	6.61286e+06	5.80037e+06	3.7156e+06	2.9738e+06	0	1.22137e+06	33726.8	1.21953e+06	0	295989	7.28346e+06	5.03326e+06	5.20781e+06	5.52182e+06	5.47431e+06	7.0749e+06	1.20427e+06	2.10907e+06	5.38163e+06	1.6689e+06	950837	4.20407e+06	72429.2	118462	0	779533	645324	67134.5
V117	HESI(+)	480.344	1.86	1.69	M+H	LPC(P-16:0)	LPC O-16:1	12628145	3.71329e+07	2.70683e+06	1.95982e+06	2.68578e+07	2.34807e+07	8.4798e+06	2.03731e+07	1.05176e+07	1.28882e+07	1.08298e+07	1.764e+07	906053	2.81695e+06	2.63371e+06	2.9355e+07	1.17913e+06	3.16861e+06	9.80581e+06	2.0336e+07	3.92312e+07	2.96346e+07	1.31686e+07	6.09302e+06	4.11046e+07	1.49615e+07	3.85002e+07	3.46466e+07	4.55683e+06	1.37788e+07	4.77751e+07	3.81568e+06	2.89108e+07	489779	133467	3.89586e+06
V118	HESI(+)	480.404	5.29	4.59	M+NH4	DG(P-6:0_20:3)	DG O-26:4	887855	2.36326e+06	3.68933e+06	2.59401e+06	3.12666e+06	3.55665e+06	4.59258e+06	5.72983e+06	5.75992e+06	4.06348e+06	1.30072e+06	7.42743e+06	999640	712164	1.25259e+06	1.05076e+06	2.83573e+06	849686	1.05052e+07	1.54445e+07	1.01493e+07	7.67945e+06	1.04118e+07	1.51047e+07	2.44382e+06	1.37925e+07	1.60557e+07	1.15462e+07	1.58521e+07	6.05953e+06	1.47445e+06	1.73337e+06	1.55823e+06	2.21525e+06	2.04902e+06	2.72815e+06
V119	HESI(+)	480.405	2.32	2.17	M+H	CAR(22:2)	CAR 22:2	7.30811e+06	3.24925e+06	1.48628e+07	7.98352e+06	8.51071e+06	4.08351e+06	1.51062e+07	2.00715e+07	1.61248e+06	1.68811e+07	6.96532e+06	7.4464e+06	4.72253e+07	1.10824e+08	1.82913e+07	2.06455e+07	1.19051e+07	9.37002e+06	45616.9	1.41282e+06	0	0	5.93411e+06	3.82539e+06	9.02272e+06	2.23449e+06	1.04166e+07	4.81945e+06	4.40337e+06	2.05542e+06	1.13715e+07	1.06919e+07	5.30622e+07	1.20922e+07	8.44055e+06	1.35975e+07
V120	HESI(+)	482.325	1.6	1.41	M+H	LPC(15:0)	LPC 15:0	328940014	311898433	4.57385e+08	4.26997e+08	6.49646e+08	3.38616e+08	1.4367e+08	1.06242e+08	135891415	1.90923e+08	2.41692e+08	1.5093e+08	1.06037e+08	1.59246e+08	1.27807e+08	103344168	6.93044e+07	1.26712e+08	1.67447e+08	1.60117e+08	1.9156e+08	2.28162e+08	2.49881e+08	1.86979e+08	220613670	1.1783e+08	1.50036e+08	1.07275e+08	1.44144e+08	2.50869e+08	7.98475e+07	8.40506e+07	8.63402e+07	9.50075e+07	1.22066e+08	7.05976e+07
V121	HESI(+)	482.325	2.3	2.15	M+H	LPE(18:0)	LPE 18:0	2187957169	2476943485	1775674033	2121881792	2810780581	2112436933	2284212236	1070908106	2140095605	2211192602	2741951805	1816280783	2746939347	2636058048	2908260766	3018022734	3620650449	2378222599	1807046366	2372642379	2008287413	1559235035	2415500143	2334973028	2841769481	1106722409	1429568783	1039162016	1399210215	5.04104e+08	2815788737	2106543156	1975161819	2594403680	2236560074	2015686364
V122	HESI(+)	482.36	1.95	1.77	M+H	LPC(O-16:0)	LPC O-16:0	4.0395e+08	3.59358e+08	7.18645e+08	6.70969e+08	1308139172	3.98267e+08	3.62272e+08	2.56575e+08	472629130	4.98093e+08	7.65145e+08	3.50988e+08	3.9176e+07	4.13322e+07	4.83385e+07	4.7597e+07	2.88633e+07	2.94389e+07	3.97582e+08	4.51913e+08	3.854e+08	3.41557e+08	6.02094e+08	4.42008e+08	4.23187e+08	4.269e+08	3.30398e+08	2.90417e+08	3.55376e+08	2.73799e+08	5.61452e+07	6.96877e+07	2.79523e+07	6.85302e+07	1.70206e+08	6.04717e+07
V123	HESI(+)	482.42	2.85	2.72	M+H	CAR(22:1)	CAR 22:1	2.68078e+08	9.74841e+07	3.26544e+08	3.58166e+08	1.62898e+08	2.16993e+07	2.01839e+08	6.27745e+07	3.56719e+07	6.04821e+07	1.76546e+08	3.75792e+07	2.94858e+08	2.97983e+08	8.51016e+07	8.25846e+07	6.87956e+07	1.00556e+08	2.13651e+07	2.54923e+07	1.37433e+07	1.58782e+07	1.76955e+07	3.84493e+07	1.11427e+08	6.1181e+07	5.15525e+07	3.94442e+07	3.0599e+07	2.66189e+07	4.81861e+07	7.32195e+07	3.45992e+08	5.78497e+07	8.20552e+07	3.68093e+08
V124	HESI(+)	484.436	3.73	3.53	M+H	CAR(22:0)	CAR 22:0	5.18343e+08	3.01594e+08	8.82997e+07	7.57189e+07	2.10824e+08	2.57694e+07	1.45864e+07	4.0674e+06	2.64803e+06	3.25607e+06	9.82674e+06	3.72203e+06	1.15912e+07	1.20115e+07	9.72205e+06	6.75776e+06	1.01128e+07	6.66105e+06	4.92671e+06	4.24238e+06	2.57269e+06	3.19573e+06	3.64858e+06	9.93888e+06	1.10259e+08	3.09595e+06	3.09831e+06	3.55079e+06	1.54982e+06	5.27219e+06	7.42917e+06	5.25938e+06	1.50352e+07	7.61087e+06	7.27409e+06	2.72316e+07
V125	HESI(+)	490.29	1.43	1.23	M+Na	LPC(14:0)	LPC 14:0	3.64922e+07	5.8525e+07	1.70679e+08	1.26871e+08	7.85741e+07	6.03528e+07	5.66336e+07	1.36267e+07	3.03124e+07	4.18512e+07	7.74634e+07	3.35157e+07	1.55502e+07	1.52516e+07	2.24324e+07	1.55155e+07	1.56098e+07	2.37457e+07	4.10258e+07	4.22442e+07	5.03852e+07	4.23027e+07	4.97598e+07	2.9788e+07	5.26735e+07	3.42945e+07	1.58281e+07	2.24492e+07	5.29094e+07	3.94615e+07	1.035e+07	1.76599e+07	1.57843e+07	2.86167e+07	3.20726e+07	2.61536e+07
V126	HESI(+)	492.31	1.39	1.18	M+H	LPC(16:2)	LPC 16:2	6.18512e+07	7.09198e+07	1.29787e+08	1.03185e+08	1.44576e+08	4.97015e+07	9.96667e+07	1.65233e+07	5.60019e+07	8.50123e+07	1.45849e+08	6.16386e+07	9.86012e+06	6.66224e+06	1.06206e+07	6.92233e+06	3.51765e+06	1.58188e+07	1.87199e+07	1.57453e+07	3.91995e+07	8.86354e+06	8.0326e+07	4.7424e+07	5.78203e+07	1.62967e+07	1.57027e+07	1.71242e+07	2.5522e+07	1.79517e+07	1.20451e+07	1.11273e+07	5.00034e+06	7.48908e+06	1.43563e+07	1.4763e+07
V127	HESI(+)	492.479	7.27	5.5	M+H-H2O	Cer(d18:1_14:0)	Cer 32:1	1.78303e+06	0	2.55112e+06	1.76031e+06	2.78594e+06	0	1.24354e+07	1.03416e+07	1.20316e+07	1.05588e+07	8.41913e+06	4.55003e+06	2.51298e+07	2.59879e+07	2.23481e+07	2.68153e+07	1.78942e+07	1.49139e+07	3.53975e+06	8.85361e+06	3.9971e+06	4.65558e+06	6.04402e+06	3.6762e+06	7.02153e+06	2.36306e+07	1.93741e+07	8.99206e+06	9022560	6.1291e+06	4.95982e+07	4.08879e+07	3.4015e+07	4.66499e+07	3.41238e+07	2.64774e+07
V128	HESI(+)	494.323	1.5	1.31	M+H	LPC(16:1)-2	LPC 16:1	2752776817	3076945437	6331016249	5831433074	4495988595	3006587011	3177101074	1204436039	2656819634	2511327290	4032737310	2271708749	1118028677	1094627938	1675491087	1166951877	818541419	1692650368	1667661777	1495053711	2480490581	1826600430	1850556923	1074713922	3087573563	1419244126	1154569760	1057942874	2043020723	2510911946	9.611e+08	1330440729	9.21908e+08	1165867317	2138494243	1637837055
V129	HESI(+)	494.324	1.93	1.76	M+H	LPC(16:1)	LPC 16:1	4.55139e+07	7.38347e+07	1.38504e+08	1.62776e+08	1.28676e+08	4.91342e+07	9.93753e+07	2.49287e+07	6.36037e+07	122085781	1.71632e+08	8.43277e+07	2.76607e+07	2.95677e+07	3.36756e+07	2.76017e+07	1.43142e+07	2.87745e+07	4.50704e+07	4.22808e+07	4.64747e+07	2.75513e+07	6.65924e+07	2.86283e+07	9.53681e+07	4.15038e+07	2.10674e+07	2.36989e+07	5.94896e+07	2.44394e+07	1.47479e+07	2.70323e+07	1.22148e+07	1.72603e+07	4.88023e+07	3.36669e+07
V130	HESI(+)	496.339	2.32	2.17	M+H	LPC(16:0)	LPC 16:0	7.47421e+08	8.35921e+08	1205919463	1021480334	1179070574	7.28203e+08	9.45365e+08	7.3054e+08	6.86448e+08	1334337968	1561085306	8.65208e+08	1021767756	987598099	1028607772	8.98263e+08	5.71878e+08	765386399	4.21024e+08	5.31419e+08	6.90914e+08	3.07473e+08	1010884425	7.35339e+08	9.88922e+08	6.61674e+08	6.42996e+08	4.34382e+08	7.2531e+08	7.20141e+08	7.79586e+08	6.20854e+08	6.77589e+08	7.92241e+08	9.55161e+08	9.26255e+08
V131	HESI(+)	500.276	1.4	1.2	M+H	LPE(20:5)	LPE 20:5	3.18755e+08	3.07989e+08	1.59679e+08	1.76829e+08	3.25968e+08	246842820	169365880	1.40929e+08	1.55638e+08	1.63123e+08	1.41025e+08	1.02985e+08	7.50604e+07	6.68323e+07	7.67334e+07	5.21831e+07	4.82483e+07	4.56482e+07	3.07518e+08	3.42977e+08	4.52861e+08	3.55121e+08	3.5822e+08	2.21247e+08	1.2538e+08	1.20856e+08	1.67744e+08	9.45224e+07	1.4122e+08	4.787e+07	3.63352e+07	3.50254e+07	4.09073e+07	5.80119e+07	5.16291e+07	2.09888e+07
V132	HESI(+)	500.276	1.63	1.44	M+H	LPE(20:5)-2	LPE 20:5	125126654	1.36094e+08	5.43483e+07	7.67064e+07	1.48675e+08	1.63936e+08	2.50352e+07	3.7583e+07	4.80807e+07	5.45667e+07	4.32737e+07	4.18849e+07	4.03704e+07	5.8261e+07	4.78597e+07	3.55141e+07	5.43211e+07	3.82194e+07	1.39948e+08	110466892	1.38954e+08	1.41133e+08	1.18849e+08	1.30916e+08	4.83394e+07	2.82219e+07	4.54361e+07	2.67194e+07	3.84689e+07	3.43934e+07	2.71376e+07	2.67586e+07	3.54947e+07	4.88307e+07	4.36899e+07	2.88683e+07
V133	HESI(+)	501.355	3.8	3.59	M+Na	DG(10:0_16:3)	DG 26:3	1.21094e+06	2.39809e+06	2.85394e+06	828341	1.38912e+06	3.7726e+06	1.79772e+06	2.30049e+06	3.5677e+06	1.44205e+06	1.17847e+06	3.27227e+06	191870	0	69734.4	112275	827951	0	5.25322e+06	8.4048e+06	3.9651e+06	2.72044e+06	5.85409e+06	7.37858e+06	1.47456e+06	1.0473e+07	1.18291e+07	9.39268e+06	10736614	4.69488e+06	11203.1	98861.8	192843	522023	0	0
V134	HESI(+)	502.291	2.13	1.97	M+Na	LPC(15:1)	LPC 15:1	2.75714e+07	4.63447e+07	7.21914e+07	9.28144e+07	6.52568e+07	3.48887e+07	4.44888e+07	2.88783e+07	5.55029e+07	7.29527e+07	6.38962e+07	5.32956e+07	4.05934e+07	2.89117e+07	3.52374e+07	4.30553e+07	3.57756e+07	3.09823e+07	4.03692e+07	4.47449e+07	2.69884e+07	2.98183e+07	4.47138e+07	4.07598e+07	3.25833e+07	2.43392e+07	2.16794e+07	3.00905e+07	3.74731e+07	1.97435e+07	1.90522e+07	2.31091e+07	2.32498e+07	3.20718e+07	5.38892e+07	4.72427e+07
V135	HESI(+)	502.291	1.92	1.75	M+H	LPE(20:4)-2	LPE 20:4	1313868967	1350210978	9.95738e+08	1285842404	1853353446	1014537379	1107346979	858477460	1178677322	1309714999	1316645419	9.39102e+08	1061057910	1202247076	1063690364	1247643618	1309120243	8.16897e+08	1369487386	1485929213	1242603533	1054642826	1545595825	1592319330	1182110465	7.68708e+08	8.12898e+08	6.75394e+08	8.49838e+08	485381111	847989776	9.01296e+08	9.24278e+08	1155158923	1227299125	9.42042e+08
V136	HESI(+)	502.293	1.59	1.39	M+H	LPE(20:4)	LPE 20:4	1890114075	1796159564	1387321111	1673070541	2047367443	1383997793	2599318493	2169391144	2297710380	2361323907	2067785721	2200384453	2157970711	2051851585	2140865393	2155692495	1882338163	1935801349	1904703675	2246885507	1974766884	1519761829	2006986864	1988388225	2215886613	2061248423	2093704848	1768544016	2096806356	1277166740	1846992962	1780194767	1842657631	1998474750	2030567050	2104619272
V137	HESI(+)	502.331	1.56	1.36	M+H	LPC(P-18:3)	LPC O-18:4	9.15565e+07	1.07233e+08	7.41457e+07	8.34629e+07	103771272	7.77694e+07	7.01048e+07	8.54469e+07	7.9225e+07	5.92563e+07	7.83719e+07	7.02288e+07	3.19917e+07	5.54193e+07	1.48678e+07	8.5518e+06	1.09903e+07	3.39148e+07	7.94997e+07	8.08704e+07	8.03825e+07	8.02565e+07	1.10132e+08	6.81265e+07	9.73056e+07	3.28126e+07	6.67265e+07	5.31758e+07	3.64008e+07	5.99441e+07	1.53291e+07	1.43343e+07	1.97444e+07	1.57443e+07	1.26762e+07	2.06305e+07
V138	HESI(+)	503.38	2.42	2.28	M+Na	LPC(15:0)	LPC 15:0	6.24185e+06	6.19916e+06	3.11435e+06	6.74507e+06	3.42342e+06	3.77571e+06	4.43506e+06	7.20696e+06	9.64294e+06	8.65329e+06	6.28845e+06	7.87656e+06	4.46832e+06	1.64484e+07	9.18855e+06	8.56851e+06	9.08529e+06	3.59021e+06	7.72362e+06	7.38283e+06	8.50151e+06	9.81029e+06	1.31288e+07	9.63864e+06	5.4801e+06	5.39734e+06	7.17973e+06	1.01045e+07	7.90594e+06	7.99596e+06	6.57458e+06	3.60139e+06	1.14421e+07	9.23428e+06	1.63392e+07	9.69076e+06
V139	HESI(+)	504.305	2.15	1.99	M+H	LPE(20:3)-2	LPE 20:3	5.55997e+07	7.7848e+07	5.34913e+07	5.47402e+07	7.00243e+07	4.3849e+07	2.81936e+07	1.81151e+07	4.35433e+07	3.76909e+07	5.24324e+07	3.26682e+07	6.19592e+07	6.10188e+07	7.72242e+07	7.36143e+07	6.67271e+07	5.1995e+07	4.3447e+07	4.06272e+07	3.66043e+07	2.55064e+07	5.94307e+07	5.29164e+07	4.37028e+07	1.61746e+07	1.74587e+07	2.01103e+07	2.01074e+07	2.16632e+07	2.58314e+07	2.19519e+07	3.17896e+07	3.78745e+07	3.43307e+07	3.71715e+07
V140	HESI(+)	504.307	2.31	2.16	M+H	PE(P-6:0_14:2)	PE O-20:3	1275310581	1353621730	8.33335e+08	1075186066	1270739619	9.48422e+08	1110943035	7.02617e+08	1180528348	1060510791	1238718587	9.13461e+08	1385626103	1688896046	1639739022	1767225185	2626551939	1361860217	6.46605e+08	1295586201	1071160604	6.84284e+08	9.33767e+08	1118939579	1764846404	6.09249e+08	7.52994e+08	4.40673e+08	6.19502e+08	2.42201e+08	1610439862	1344921564	1283611820	1266706422	1174941601	1428881989
V141	HESI(+)	504.309	1.68	1.49	M+H	LPE(20:3)	LPE 20:3	2.3254e+08	2.19848e+08	2.06218e+08	2.40197e+08	3.40219e+08	2.08568e+08	1.79688e+08	6.37428e+07	1.81697e+08	1.81496e+08	1.79451e+08	1.29592e+08	1.28298e+08	6.56314e+07	196301092	1.3745e+08	1.45416e+08	1.20929e+08	190119671	1.94775e+08	163915989	1.75763e+08	2.2475e+08	1.95655e+08	2.14769e+08	1.48271e+08	1.40058e+08	1.04612e+08	1.39135e+08	2.50124e+07	1.2276e+08	6.61945e+07	1.2093e+08	1.40448e+08	1.74945e+08	1.25899e+08
V142	HESI(+)	504.344	2.14	1.98	M+H	LPC(P-18:2)	LPC O-18:3	8.71791e+06	9.54194e+06	2.10898e+07	1.90652e+07	2.2488e+07	9.81882e+06	4.48407e+06	4.75782e+06	1.10204e+07	1.03143e+07	1.85907e+07	8.587e+06	1.06201e+06	0	2.95208e+06	2.1877e+06	1.47917e+06	507997	1.027e+07	7.38684e+06	6.82736e+06	6.79586e+06	1.05993e+07	8.02673e+06	5.92481e+06	5.6139e+06	7.37667e+06	8.51128e+06	1.18158e+07	9.94536e+06	2.21967e+06	3.14191e+06	3.8603e+06	3.02215e+06	6.03005e+06	5.43646e+06
V143	HESI(+)	504.344	1.94	1.77	M+H	LPC(P-18:2)	LPC O-18:3	1155334169	9.47402e+08	1317731269	1499155562	2696504169	8.07117e+08	9.29455e+08	7.25154e+08	1199518184	1266907986	1556951051	7.73319e+08	1.90652e+08	1.21908e+08	1.33895e+08	1.26845e+08	1.43424e+08	1.32828e+08	1039873218	1269760854	1002215409	7.99495e+08	1474992305	1140292666	1203255074	1008125791	7.65768e+08	6.40164e+08	7.39304e+08	4.92759e+08	202472034	1.90104e+08	7.77348e+07	2.20306e+08	3.67569e+08	1.57058e+08
V144	HESI(+)	504.405	2.15	1.99	M+H	CAR(24:4)	CAR 24:4	1.11542e+06	258130	1.2426e+07	1.8227e+07	410611	0	2.2538e+07	2.67481e+07	8.00094e+06	1.41001e+07	2.22193e+07	4.2651e+06	7.13742e+07	2.15244e+08	3.70666e+07	7.72829e+07	1.26307e+07	1.55253e+07	1.94183e+06	1.92926e+06	1.88132e+06	839989	4.45262e+06	9.43298e+06	4.15188e+06	6.78293e+06	5.19552e+06	5.22343e+06	4.00315e+06	5.54595e+06	2.07154e+06	3.66337e+06	2.34664e+07	4.71964e+06	2.5259e+06	1.08669e+07
V145	HESI(+)	506.323	1.44	1.24	M+H	LPC(17:2)	LPC 17:2	2.58934e+07	2.94555e+07	4.08955e+07	2.87037e+07	4.07052e+07	2.62696e+07	1.76934e+07	1.00216e+07	1.03294e+07	1.61023e+07	1.8277e+07	1.07347e+07	2.16291e+06	2.06955e+06	1.97903e+06	1.69775e+06	158914	2.91828e+06	8.8541e+06	8.4642e+06	1.14992e+07	9.00919e+06	1.43682e+07	6.33961e+06	1.73486e+07	6.33005e+06	4.29469e+06	3.13503e+06	8.29666e+06	6.70773e+06	1.029e+06	524422	288525	1.72229e+06	607349	1.24421e+06
V146	HESI(+)	506.324	1.61	1.41	M+H	LPC(17:2)	LPC 17:2	3.40475e+06	6.20528e+06	72688.6	0	9.28652e+06	9.43433e+06	0	1.55127e+06	2.52478e+06	0	210380	0	20070.6	1.73553e+06	16381	42060.1	1.93538e+06	0	0	6.27344e+06	5.03526e+06	6.87282e+06	7.365e+06	9.00086e+06	27199.5	0	0	0	16877.7	0	35481.7	21197.2	30122.2	0	3400.46	15442.8
V147	HESI(+)	506.36	2.25	2.1	M+H	LPC(P-18:1)	LPC O-18:2	1.31384e+08	108015837	1.4593e+08	1.52665e+08	1.43081e+08	1.36062e+08	7.13325e+07	1.55686e+08	1.78272e+08	1.76053e+08	2.50217e+08	1.69918e+08	1.9677e+08	1.48402e+08	1.61456e+08	147032748	1.42751e+08	1.52497e+08	175820130	1.48867e+08	1.22443e+08	1.19456e+08	1.68681e+08	1.7307e+08	1.5603e+08	162901558	1.41115e+08	1.86465e+08	1.37819e+08	1.48352e+08	1.98831e+08	2.41297e+08	1.52485e+08	1.32568e+08	1.58829e+08	2.0597e+08
V148	HESI(+)	507.271	1.98	1.81	M+Na	TG(22:7_2:0_2:0)	TG 26:7	7.61598e+07	4.98443e+07	3.60011e+07	3.01339e+07	4.95738e+07	2.54855e+07	3.7326e+07	3.57959e+07	4.67578e+07	5.78678e+07	5.42754e+07	6.05883e+07	4.77417e+07	5.10573e+07	1.73023e+08	2.11267e+08	4.5693e+07	3.75953e+07	3.15147e+07	4.02507e+07	3.99971e+07	5.44255e+07	4.26688e+07	3.44957e+07	3.69843e+07	3.03818e+07	2.88503e+07	3.14279e+07	2.71797e+07	2.89048e+07	2.98363e+07	3.61682e+07	3.68041e+07	4.09489e+07	2.50906e+07	3.55972e+07
V149	HESI(+)	507.365	3.45	3.28	M+Na	TG(3:0_6:0_16:0)	TG 25:0	8.35972e+06	9.63698e+06	9.78887e+06	5.72671e+06	7.2356e+06	8.15147e+06	1.28572e+07	6.31123e+06	7.44979e+06	8.24621e+06	8.6884e+06	1.08497e+07	1.25244e+07	1.33011e+07	1.67268e+07	1.84663e+07	2.57126e+07	2.31351e+07	1.04172e+07	1.17217e+07	1.27345e+07	7.63707e+06	2.30174e+07	1.00619e+07	1.17792e+07	1.40487e+07	1.52813e+07	1.15007e+07	1.40344e+07	7.37184e+06	2.1998e+07	1.59517e+07	2.3589e+07	3.84196e+07	1.42527e+07	1.57366e+07
V150	HESI(+)	508.339	1.67	1.48	M+H	LPC(17:1)-2	LPC 17:1	6.08864e+08	5.02938e+08	8.72948e+08	8.88496e+08	1097511831	503119314	3.78396e+08	221501478	3.9707e+08	4.14499e+08	5.60531e+08	3.69793e+08	1.40632e+08	1.72695e+08	1.78907e+08	1.14894e+08	7.47839e+07	1.87874e+08	2.9746e+08	2.39076e+08	3.12939e+08	3.10117e+08	4.00478e+08	2.79815e+08	4.55727e+08	2.17649e+08	2.10481e+08	1.97443e+08	3.14427e+08	2.66597e+08	8.88101e+07	1.12492e+08	1.01397e+08	1.56961e+08	1.78124e+08	1.03907e+08
V151	HESI(+)	508.34	1.9	1.72	M+H	LPC(17:1)	LPC 17:1	4.36223e+07	4.07709e+07	7.89103e+07	8.47755e+07	1.08607e+08	3.40291e+07	4.81888e+07	3.05144e+07	3.67001e+07	6.38596e+07	7.30134e+07	4.02833e+07	3.21048e+07	4.29801e+07	3.72872e+07	2.49026e+07	1.87059e+07	2.3709e+07	3.29322e+07	4.27969e+07	3.81436e+07	3.9068e+07	5.68672e+07	4.21228e+07	4.90104e+07	2.55763e+07	2.67395e+07	2.37038e+07	3.29088e+07	1.2209e+07	1.73154e+07	1.9724e+07	2.28894e+07	2.99323e+07	3.58786e+07	3.17785e+07
V152	HESI(+)	508.34	2.39	2.25	M+H	LPE(20:1)	LPE 20:1	9.00332e+07	1.02896e+08	1.3626e+08	1.63999e+08	2.15064e+08	7.46738e+07	1.84602e+08	4.34695e+07	1.28592e+08	1.2128e+08	3.46695e+08	1.13026e+08	9.7897e+07	8.48641e+07	1.4855e+08	9.45421e+07	1.13986e+08	1.10124e+08	1.72613e+07	3.11939e+07	2.09849e+07	1.88765e+07	3.17448e+07	3.16522e+07	1.27369e+08	4.86e+07	4.3926e+07	2.83672e+07	4.8872e+07	1.79832e+07	1.22119e+08	9.33951e+07	1.03868e+08	8.82467e+07	2.00636e+08	8.306e+07
V153	HESI(+)	508.377	2.47	2.34	M+H	LPC(P-18:0)	LPC O-18:1	2.16734e+07	1.78184e+07	1.72203e+07	2.40851e+07	4.79863e+07	1.21923e+07	1.47646e+07	1.38247e+07	2.31669e+07	1.87068e+07	4.31568e+07	1.37116e+07	9.55332e+06	1.16308e+07	1.82877e+07	1.10414e+07	1.02634e+07	1.11884e+07	1.51123e+07	2.70209e+07	1.42391e+07	1.7228e+07	4.51379e+07	3.00445e+07	9.97254e+06	1.35453e+06	2.25651e+06	1.15638e+06	3.30252e+06	1.21224e+07	1.22184e+07	1.34746e+07	1.26583e+07	1.57413e+07	1.41854e+07	1.27639e+07
V154	HESI(+)	508.378	2.05	1.89	M+H	LPC(P-18:0)-2	LPC O-18:1	1.97791e+08	2.11299e+08	7.71651e+08	6.98651e+08	8.40426e+08	2.265e+08	4.16939e+08	3.20673e+08	6.54652e+08	5.575e+08	1130425476	4.74814e+08	9.63391e+07	103584910	1.4308e+08	1.02497e+08	6.33575e+07	9.69269e+07	3.0004e+08	345010546	2.27389e+08	1.77164e+08	4.41335e+08	3.32137e+08	2.80822e+08	4.61446e+08	3.25897e+08	2.94306e+08	3.2853e+08	3.2641e+08	9.24904e+07	1.92199e+08	5.63549e+07	1.24956e+08	2.46936e+08	1.08103e+08
V155	HESI(+)	509.289	1.35	1.15	M+H	LPG(18:2)	LPG 18:2	1.1018e+07	1.18419e+07	5.32659e+07	2.21658e+07	2.47921e+07	1.26985e+07	1.88567e+07	1.21729e+07	1.53094e+07	1.63954e+07	3.69592e+07	1.12523e+07	2.0526e+07	2.32105e+07	2.13634e+07	1.73147e+07	7.55581e+06	1.70795e+07	1.60579e+07	2.05529e+07	1.68089e+07	8.88578e+06	2.63263e+07	1.74336e+07	2.50005e+07	1.03896e+07	1.03934e+07	1.03875e+07	1.34396e+07	9.7874e+06	1.32806e+07	1.17708e+07	7.91967e+06	1.46846e+07	1.60057e+07	1.02646e+07
V156	HESI(+)	510.294	2.6	2.46	M+H	LPC(17:0)	LPC 17:0	2.80644e+06	2.71596e+06	4.56158e+06	3.08519e+06	7.93908e+06	960655	0	1.40984e+06	3.57642e+06	2.42378e+06	7.39938e+06	367680	1.39418e+06	2.09244e+06	2.96456e+06	1.5904e+06	2.1364e+06	2.12261e+06	2.60192e+06	1.68895e+06	3.10868e+06	213690	5.36712e+06	6.48193e+06	2.05931e+06	0	0	936159	0	601403	2.21807e+06	2.11031e+06	1.09732e+06	2.35722e+06	2.2152e+06	1.2497e+06
V157	HESI(+)	510.357	2.3	2.15	M+H	LPC(17:0)-2	LPC 17:0	4.95057e+07	6.65454e+07	6.27499e+07	7.10219e+07	1.18217e+08	6.19152e+07	5.35267e+07	3.55601e+07	5.75326e+07	6.72978e+07	8.12682e+07	6.40244e+07	9.10859e+07	8.42593e+07	1.21918e+08	9.12291e+07	1.17063e+08	7.60803e+07	9.37593e+07	8.49085e+07	7.31369e+07	6.5511e+07	1.14692e+08	7.07246e+07	6.66644e+07	3.30828e+07	59731081	4.90731e+07	5.88665e+07	2.87663e+07	7.19416e+07	9.28804e+07	8.24206e+07	8.41296e+07	6.38612e+07	9.51897e+07
V158	HESI(+)	510.357	3.02	2.88	M+H	LPE(20:0)	LPE 20:0	3.32457e+07	3.29974e+07	1.28052e+07	1.28863e+07	4.56057e+07	3.5971e+07	6.94911e+06	709049	4.14649e+06	5.5923e+06	9.42942e+06	3.01438e+06	1.81445e+06	2.13459e+06	2.27365e+06	1.59052e+06	1.97482e+06	2.60033e+06	2.29279e+06	2.30254e+06	2.58932e+06	2.3711e+06	4.34306e+06	2.63455e+06	1.33076e+07	418980	1.07114e+06	695170	843380	1.2426e+06	1.68322e+06	700305	1.7413e+06	1.57862e+06	2.31283e+06	240424
V159	HESI(+)	510.357	1.95	1.78	M+H	LPC(17:0)	LPC 17:0	2482097080	1926818691	3497134014	3730473534	6249413081	1719788422	1657610445	1842229319	2100455331	2389595620	3246003791	1966055228	1249239090	1341710259	1201709385	1037081537	6.51136e+08	1038281700	1849612041	2040765463	1808073749	1784014319	3779428021	1954511417	1443278952	1414110310	1526691938	1248599573	1556620829	1381090495	8.68991e+08	1106957560	1018066357	1025978175	8.93891e+08	6.18824e+08
V160	HESI(+)	510.392	2.51	2.37	M+H	LPC(O-18:0)	LPC O-18:0	9.37728e+07	9.63068e+07	1.74471e+08	1.61563e+08	199192703	1.16659e+08	5.66444e+07	5.97796e+07	8.31655e+07	8.95191e+07	1.23778e+08	7.64316e+07	1.4174e+07	1.38423e+07	1.68048e+07	1.45243e+07	7.08412e+06	1.46518e+07	1.1718e+08	131521355	1.14367e+08	1.01954e+08	1.96283e+08	1.45873e+08	6.03074e+07	9.92609e+07	6.58033e+07	7.20064e+07	8.59253e+07	8.24864e+07	2.29149e+07	2.15908e+07	8.60865e+06	2.71531e+07	4.65894e+07	2.48836e+07
V161	HESI(+)	510.452	3.81	3.6	M+H	CAR(24:1)	CAR 24:1	1.68365e+08	9.22882e+07	6.77283e+07	6.85413e+07	1.08973e+08	1.31897e+07	3.74436e+07	1.11617e+07	8.34739e+06	9.87184e+06	3.14147e+07	1.23592e+07	2.35861e+07	1.90752e+07	1.95335e+07	1.46533e+07	1.98845e+07	1.26956e+07	5.63799e+06	6.05769e+06	3.17872e+06	3.5586e+06	5.13797e+06	1.08885e+07	7.74496e+07	8.14199e+06	9.20218e+06	6.32027e+06	5.47477e+06	8.95677e+06	1.32307e+07	1.17945e+07	2.89711e+07	1.29221e+07	1.62172e+07	1.74205e+07
V162	HESI(+)	512.468	4.92	4.39	M+H	CAR(24:0)	CAR 24:0	1.2675e+08	6.58011e+07	2.57207e+07	2.16422e+07	5.68195e+07	1.4668e+07	8.43968e+06	5.97228e+06	3.71948e+06	4.28628e+06	7.45934e+06	4.58663e+06	1.13287e+07	1.25418e+07	7.91077e+06	7.3654e+06	7.67314e+06	5.69124e+06	4.48738e+06	4.0291e+06	2.63896e+06	2.4592e+06	3.54738e+06	7.19204e+06	2.64486e+07	4.17787e+06	3.84875e+06	4.12255e+06	2.82601e+06	6.35498e+06	8.78238e+06	4.91328e+06	1.02913e+07	1.12721e+07	7.07034e+06	4.01214e+06
V163	HESI(+)	514.291	1.37	1.16	M+Na	LPC(16:2)	LPC 16:2	2.92105e+07	2.81902e+07	4.77953e+07	4.0386e+07	5.59536e+07	1.02496e+07	5.45121e+07	4.00584e+07	4.48341e+07	6.55198e+07	8.27785e+07	3.33253e+07	3.30432e+07	8.24215e+06	2.34947e+07	6.88472e+06	3.00557e+06	2.4006e+07	5.90325e+06	2.09664e+07	17617383	6.1747e+06	1.1198e+07	1.01997e+07	2.51064e+07	2.19368e+07	2.26919e+07	4.0651e+06	7.84823e+06	6.13505e+06	6.79175e+06	13814257	3.13024e+06	9.58936e+06	9.25276e+06	1.00951e+07
V164	HESI(+)	515.363	3.89	3.66	M+Na	DG(10:0_17:3)	DG 27:3	17743.6	1958.89	122248	101595	42035	121604	119315	116684	68779.8	222743	337377	122083	742552	75478.9	234956	71285.3	203636	555602	937571	48894.3	4256.62	129617	4129.61	293661	371737	1.70534e+06	1.30091e+06	5.09809e+06	284111	3.0221e+06	6.6136e+06	8.9235e+06	8.95948e+06	1.44992e+07	3.62318e+06	2.63794e+06
V165	HESI(+)	516.307	1.48	1.28	M+Na	LPC(16:1)-2	LPC 16:1	2.53601e+08	2.08586e+08	4.70638e+08	4.73485e+08	183079713	2.19543e+08	1.70496e+08	6.89007e+07	1.48308e+08	1.42007e+08	1.77445e+08	1.57852e+08	8.4016e+07	7.02923e+07	1.49857e+08	9.37251e+07	9.05636e+07	1.36112e+08	1.03351e+08	7.62729e+07	1.56333e+08	1.5309e+08	9.31322e+07	5.83317e+07	147928798	8.51933e+07	6.29574e+07	74103280	1.18555e+08	3.18379e+08	8.56045e+07	1.22877e+08	9.1808e+07	1.17299e+08	2.55553e+08	1.17603e+08
V166	HESI(+)	516.308	1.93	1.76	M+Na	LPC(16:1)	LPC 16:1	9.56265e+07	1.31655e+08	1.52824e+08	1.99368e+08	1.74974e+08	6.96956e+07	1.25528e+08	5.30411e+07	8.58856e+07	139877595	2.03598e+08	8.57226e+07	3.13103e+07	4.06883e+07	4.33433e+07	4.48164e+07	3.21943e+07	3.96652e+07	7.10093e+07	7.22329e+07	7.22614e+07	4.22219e+07	1.04958e+08	6.60808e+07	1.38933e+08	4.67636e+07	3.14668e+07	31973711	6.8821e+07	3.73663e+07	1.84563e+07	3.38178e+07	1.25837e+07	2.88261e+07	3.85166e+07	3.87794e+07
V167	HESI(+)	516.308	1.63	1.44	M+H	LPC(18:4)	LPC 18:4	4.87043e+07	1.29496e+08	7.99306e+07	7.87128e+07	254390079	1.52337e+08	7.78769e+07	6.43869e+07	9.5515e+07	1.22053e+08	1.68615e+08	1.08012e+08	1.00212e+08	6.9285e+07	1.09987e+08	9.97457e+07	7.3659e+07	1.10194e+08	1.32316e+08	7.03577e+07	1.40695e+08	1.06782e+08	1.51624e+08	8.42186e+07	5.73055e+07	7.43641e+07	7.61395e+07	6.41993e+07	7.81568e+07	5.18523e+07	4.93449e+07	7.61544e+07	3.21227e+07	7.40606e+07	5.23196e+07	1.3042e+08
V168	HESI(+)	516.31	1.31	1.1	M+H	LPC(18:4)	LPC 18:4	3.82274e+07	4.17778e+07	5.38359e+07	4.25234e+07	4.05964e+07	3.12673e+07	6.75313e+06	1.20316e+07	1.97106e+07	2.16848e+07	3.59304e+07	4.92445e+06	1.44052e+06	1.74855e+06	1.67809e+06	1.1932e+06	364699	1.77553e+06	2.1986e+07	1.67167e+07	1.73588e+07	1.3898e+07	3.13039e+07	1.33362e+07	6.59641e+06	1.2799e+06	1.65352e+06	3.00095e+06	3.64024e+06	5.57745e+06	242229	693681	602724	427996	844615	474102
V169	HESI(+)	516.421	5.55	4.72	M+NH4	TG(8:0_8:0_10:0)	TG 26:0	5.91943e+06	5.32544e+06	5.59356e+06	7.05073e+06	5.69162e+06	1.87663e+06	4.15323e+06	3.52884e+06	7.29559e+06	2.88653e+06	5.46575e+06	4.03829e+06	6.00477e+06	9.57443e+06	3.48405e+06	4.8464e+06	5.26064e+06	4.68001e+06	2.06044e+06	2.2586e+06	3.32957e+06	2.14733e+06	3.26473e+06	1.62075e+06	4.61506e+06	6.32154e+06	971589	3.28494e+06	1.71711e+06	2.62453e+06	5.77376e+06	4.64313e+06	9.36718e+06	9.69577e+06	6.46451e+06	4.8835e+06
V170	HESI(+)	518.321	1.71	1.53	M+H	LPC(18:3)	LPC 18:3	11896819032	13166114482	6857394029	8399112384	13915199977	9274460901	11926264346	17934693324	11448328022	12655592623	11338064510	9546068431	16617536836	17227391951	14593414915	18132855343	17467336489	14124994103	14835494307	17952244278	24403288154	19472899386	17806248012	17953606088	7542805113	13172570108	11905304672	10500791405	15938611676	10140865140	23144469536	14221381127	14660608811	17543895950	12768972502	12273518967
V171	HESI(+)	518.322	2.13	1.97	M+Na	LPC(16:0)	LPC 16:0	1331296945	1991169202	3296302504	3405778944	2890562224	1483740782	1818493341	8.79437e+08	1252508052	2876990588	3027233142	2247548879	1941358413	1079548229	1984058979	2009276432	1547491619	1529748242	1218115200	9.96789e+08	8.52716e+08	712583434	1679673260	8.44806e+08	1760236870	8.02423e+08	7.7015e+08	1256483785	1836010137	1534793076	8.12068e+08	1091538311	1356131996	1410770302	1781156114	2441141978
V172	HESI(+)	518.492	7.43	5.59	M+H-H2O	Cer(d18:2_16:0)	Cer 34:2	1.61298e+07	1.81808e+07	7.69027e+06	11626972	1.08569e+07	1.09127e+07	2.25763e+07	1.16014e+07	2.11227e+07	1.50531e+07	1.5775e+07	1.26898e+07	2.62896e+07	3.18719e+07	2.62102e+07	2.25861e+07	2.58692e+07	1.66478e+07	1.11611e+07	1.15016e+07	1.1986e+07	5.59733e+06	1.03825e+07	6.76226e+06	3.32193e+07	2.08668e+07	2.07905e+07	9.88711e+06	6.82038e+06	1.5201e+07	5.19983e+07	3.67562e+07	2.93385e+07	3.23823e+07	2.65666e+07	1.07213e+07
V173	HESI(+)	520.339	1.57	1.37	M+H	LPC(18:2)	LPC 18:2	35887272617	35965296916	31751372668	31890761302	34456523260	30500464540	33090965882	28051984026	28833972816	28258000574	27860438812	23712145614	14554209960	23653318554	16269494604	13817380409	10967344271	14010779426	26391228038	30748810276	29274015398	26150682929	33419462398	28871145513	31749077214	25604326848	26503812165	20152569936	24671070332	23937465453	12451494350	15598602768	14133637606	13658152038	14551938311	11517445481
V174	HESI(+)	520.342	1.9	1.73	M+H	LPC(18:2)-2	LPC 18:2	5.27395e+08	7.27474e+08	869013895	9.22807e+08	6.72665e+08	1.28406e+08	962305807	1.73083e+08	2.19231e+08	1001794775	7.73401e+08	5.91488e+08	3.18462e+07	2.63827e+07	2.13542e+07	1.22334e+07	3.36668e+07	1.1027e+07	5.0888e+08	6.46166e+08	1.78289e+08	1.2696e+08	7.51911e+08	5.28232e+08	1044955570	5.54704e+08	1.985e+08	5.04259e+08	6.38389e+08	7.74594e+07	3.03661e+07	1.69774e+07	2.80677e+07	1.12847e+07	1.60032e+08	1.96377e+07
V175	HESI(+)	520.508	8.26	6.17	M+H-H2O	Cer(d18:1_16:0)	Cer 34:1	4.57709e+08	397745135	1.47197e+08	1.95608e+08	2.67818e+08	124785348	5.91684e+08	6.9904e+08	5.51628e+08	6.46909e+08	4.64119e+08	3.94561e+08	6.52225e+08	1574913882	7.88156e+08	9.60452e+08	5.22911e+08	4.36606e+08	2.21419e+08	3.45734e+08	3.19296e+08	1.71975e+08	3.0032e+08	3.05999e+08	3.77184e+08	6.5458e+08	4.84982e+08	318143020	2.37283e+08	3.39698e+08	1455335362	1013900385	1066680239	1066091679	7.96456e+08	3.62228e+08
V176	HESI(+)	522.354	1.84	1.67	M+H	LPC(18:1)	LPC 18:1	26980084334	26650267200	47614514280	54425265248	37275942458	20286261774	57073373163	44829577753	52588539025	55240789803	64478496899	46219010482	30742029881	32998425405	32104904098	28075415343	22906397123	34669770882	26114501664	30338628839	25803430025	24304423946	33713496128	25351090274	38609611573	36539871136	33701197843	27811265369	38631441588	28754439094	22736970714	31811193092	28071048768	27490370704	41362692475	25740936607
V177	HESI(+)	522.355	2.39	2.24	M+H	LPC(18:1)-2	LPC 18:1	4.60017e+07	5.08193e+07	8.75193e+07	9.43491e+07	5.48742e+07	3.15352e+07	7.57326e+07	6.9519e+07	1.06464e+08	9.34372e+07	1.60356e+08	1.0688e+08	5.61669e+07	5.48383e+07	6.14184e+07	4.01899e+07	2.60474e+07	7.23569e+07	4.71796e+07	7.10922e+07	1.43234e+08	3.00415e+07	6.48311e+07	4.23955e+07	7.14299e+07	7.20829e+07	4.59513e+07	3.5715e+07	7.64612e+07	3.83e+07	3.00461e+07	4.17349e+07	3.80672e+07	4.11702e+07	7.20551e+07	4.41309e+07
V178	HESI(+)	522.355	2.32	2.17	M+H	LPC(18:1)-2	LPC 18:1	2.57721e+08	297412183	6.87878e+08	7.22007e+08	4.39231e+08	1.95459e+08	678526522	4.34915e+08	6.16807e+08	7.65079e+08	1315480759	6.45079e+08	3.7985e+08	3.63767e+08	4.24033e+08	2.86451e+08	2.09065e+08	3.13498e+08	2.18081e+08	2.40161e+08	2.23496e+08	1.695e+08	2.86754e+08	2.54019e+08	4.97472e+08	3.2799e+08	3.12235e+08	291346488	4.41643e+08	2.76133e+08	2.2895e+08	3.21595e+08	2.74771e+08	303943094	3.69434e+08	2.34928e+08
V179	HESI(+)	523.449	5.84	4.85	M+Na	WE(O-16:2_18:2)	WE O-34:4	7.56794e+06	1.07141e+07	1.70625e+07	7.99397e+06	5.66209e+06	1.60673e+07	5.38159e+06	1.23604e+07	1.24933e+07	6.10285e+06	4.39692e+06	1.13301e+07	487975	165685	192704	1.90618e+06	112687	517882	1.2702e+07	1.78445e+07	9.90765e+06	8.06977e+06	1.16997e+07	8.70881e+06	2.71275e+06	1.25919e+07	1.7441e+07	2.04452e+07	3.14783e+07	3.51461e+07	57621.9	4457.57	5434.22	1.26822e+06	127176	153582
V180	HESI(+)	523.451	5.56	4.72	M+H	VAE(16:1)	VAE 16:1	2.81511e+08	2.85638e+08	3.63552e+08	2.34997e+08	260964432	5.97984e+08	2.19932e+08	4.29363e+08	3.69294e+08	1.57752e+08	9.41551e+07	3.55944e+08	1.83316e+07	3.48068e+06	9.15575e+06	2.69437e+07	0	6.65868e+06	3.78588e+08	3.57853e+08	3.01705e+08	3.20674e+08	4.3255e+08	3.21818e+08	1.05985e+08	5.05341e+08	7.0606e+08	6.46301e+08	1973570650	1352892160	3.57784e+06	1.84553e+06	4.42361e+06	2.44116e+07	3.56051e+06	0
V181	HESI(+)	524.372	2.81	2.68	M+H	CAR(26:8)	CAR 26:8	2.51364e+08	449094288	4.34902e+08	3.25595e+08	4.95194e+08	2.62617e+08	2.23564e+08	5.32016e+08	7.49256e+08	5.35541e+08	1036007541	8.46782e+08	5.54557e+08	3.37377e+08	6.48446e+08	5.21036e+08	2.35405e+08	4.41917e+08	6.03353e+08	276090778	3.97959e+08	5.04788e+08	7.41006e+08	4.26505e+08	2.94256e+08	6.98319e+08	5.70265e+08	4.6071e+08	4.61008e+08	4.65036e+08	300406266	7.63364e+08	6.223e+08	5.21805e+08	6.70637e+08	1.17416e+08
V182	HESI(+)	524.373	2.22	2.07	M+H	LPC(18:0)	LPC 18:0	41711714977	40255116862	52501713188	53905080248	60494312284	41984591365	66231096478	60550571920	73404802984	71839072905	83772397665	66984001370	68027281273	60118094562	64360607395	64751091521	57685122526	62835980414	65608426210	55666137496	58771621970	48419512870	75649201883	56591758664	41323376167	67732700390	59683978603	63315255061	62046469780	54770424875	72842939758	89716615325	68807704638	64882305022	65141763431	67904899328
V183	HESI(+)	526.291	1.51	1.31	M+H	LPE(22:6)	LPE 22:6	3453074473	2938179390	2079334785	2553106492	3313894684	2143569226	2502257580	2270980747	2143109464	2080905654	2165289988	1522633165	1927844218	2428356967	2300242716	2321020136	2122439539	1777445741	2273358022	3630631099	3014600068	2496497783	2952618138	2496144086	3781435646	1645223754	1926708638	1741681956	2034586911	1221998623	2274001612	1575613013	1752908734	2129466836	2583949629	1966261350
V184	HESI(+)	528.309	1.7	1.51	M+H	LPE(22:5)	LPE 22:5	3.78399e+07	3.06205e+07	8.95437e+07	2.13757e+08	2.59527e+07	2.31755e+07	1.04211e+08	8.73043e+07	1.27544e+08	1.12154e+08	1.48075e+08	1.22713e+08	8.88291e+07	1.60796e+08	1.66498e+08	1.31911e+08	1.2141e+08	1.78581e+08	1.81677e+07	2.42342e+07	2.59093e+07	1.67851e+07	1.8309e+07	1.88121e+07	3.00015e+08	4.29921e+07	6.84358e+07	8.22448e+07	6.75606e+07	7.18419e+07	9.45475e+07	8.76868e+07	7.52549e+07	1.07792e+08	184073375	3.11458e+08
V185	HESI(+)	528.345	1.98	1.81	M+Na	LPC(P-18:1)-2	LPC O-18:2	1.70367e+07	11761940	1.16276e+07	1.35075e+07	2.71108e+07	6.58901e+06	1.65373e+07	1.17122e+07	1.54907e+07	2.08283e+07	4.14791e+07	8.4607e+06	9.71497e+06	9.55781e+06	9.434e+06	8.04667e+06	9.74719e+06	9.03148e+06	9.78454e+06	1.18875e+07	6.78855e+06	5.44188e+06	1.44113e+07	7.8287e+06	1.81205e+07	3.81629e+06	6.988e+06	5.32993e+06	8.68755e+06	7.81668e+06	8.2258e+06	1.10537e+07	8.03993e+06	8.81022e+06	4.88024e+06	6.65424e+06
V186	HESI(+)	530.322	1.91	1.73	M+Na	LPC(17:1)	LPC 17:1	1.47739e+08	1.31538e+08	1.46535e+08	1.93705e+08	2.27609e+08	9.57609e+07	1.57512e+08	1.60007e+08	1.54293e+08	166421568	1.67141e+08	1.29954e+08	129501696	1.80082e+08	1.52595e+08	1.45749e+08	3.57053e+07	9.73399e+07	121117321	1.59751e+08	115548626	1.03453e+08	1.40679e+08	1.43864e+08	184659109	4.58359e+07	4.98613e+07	1.10349e+08	1.31408e+08	2.22329e+07	2.83206e+07	4.1384e+07	1.00918e+08	1.21267e+08	1.14828e+08	8.29841e+07
V187	HESI(+)	530.322	1.68	1.49	M+H	LPC(19:4)-2	LPC 19:4	2.52002e+08	2.57129e+08	2.95257e+08	3.35187e+08	7.37227e+08	2.69348e+08	1.06687e+08	1.06895e+08	154152194	2.03649e+08	2.82429e+08	1.8552e+08	1.33271e+08	1.03372e+08	1.06088e+08	9.97499e+07	7.66975e+07	1.33835e+08	2.46572e+08	1.22464e+08	1.96466e+08	1.75826e+08	334404341	2.38597e+08	1.20951e+08	7.67684e+07	9.82805e+07	1.1713e+08	1.38923e+08	1.39311e+08	3.86766e+07	5.80738e+07	6.37625e+07	1.10515e+08	1.03352e+08	7.78037e+07
V188	HESI(+)	530.323	2.38	2.24	M+H	LPE(22:4)-2	LPE 22:4	5.27936e+07	4.34576e+07	8.02826e+07	8.16311e+07	1.19367e+08	3.69337e+07	1.06648e+08	1.85173e+07	6.84504e+07	7.54195e+07	2.09805e+08	6.11387e+07	6.17145e+07	4.79213e+07	6.93173e+07	4.91777e+07	6.68462e+07	7.07379e+07	9.82501e+06	1.43323e+07	6.52379e+06	8.00013e+06	1.24436e+07	1.7497e+07	8.2312e+07	2.3027e+07	1.41014e+07	1.23014e+07	1.79473e+07	8.26337e+06	8.12675e+07	4.41628e+07	5.89e+07	4.17981e+07	109938129	4.93795e+07
V189	HESI(+)	530.325	1.43	1.22	M+H	LPC(19:4)	LPC 19:4	1.81048e+07	2.21861e+07	3.21432e+07	2.4269e+07	1.78082e+07	1.26728e+07	2.09319e+07	1.08004e+07	1.4417e+07	1.46404e+07	1.98651e+07	9.51003e+06	5.46581e+06	5.02396e+06	4.38336e+06	2.97171e+06	2.05952e+06	6.31662e+06	1.39546e+07	1.25171e+07	1.45697e+07	9.21174e+06	1.5682e+07	6.93844e+06	1.19521e+07	6.22936e+06	8.84405e+06	8.96072e+06	1.42961e+07	7.61905e+06	4.37043e+06	4.80731e+06	3.6063e+06	5.77102e+06	5.32723e+06	1.01091e+07
V190	HESI(+)	530.325	1.85	1.67	M+H	LPE(22:4)	LPE 22:4	2.11939e+07	2.0191e+07	1.75978e+07	2.73019e+07	29098173	1.75649e+07	3.56497e+07	4.41148e+07	3.46302e+07	2.74476e+07	2.88957e+07	2.78766e+07	8.97665e+07	1.25992e+08	1.05168e+08	9.09026e+07	9.00501e+07	7.40564e+07	1.64799e+07	2.06351e+07	1.80081e+07	1.77952e+07	1.4755e+07	2.52669e+07	4.34519e+07	1.37881e+08	1.08093e+08	7.87422e+07	2.69794e+07	5.31329e+07	8.12217e+07	8.75889e+07	7.29609e+07	3.44287e+07	8.64115e+07	2.02903e+07
V191	HESI(+)	530.359	2.05	1.89	M+H	LPC(P-20:3)	LPC O-20:4	1.27674e+08	1.59353e+08	7.61493e+08	6.48474e+08	9.12252e+08	1.71989e+08	3.01797e+08	2.11732e+08	4.49914e+08	4.8845e+08	1338857330	4.25981e+08	8.32082e+07	6.46554e+07	1.01176e+08	7.53402e+07	5.18206e+07	8.21446e+07	2.10172e+08	1.97621e+08	1.25094e+08	9.5048e+07	3.60471e+08	2.36372e+08	1.77393e+08	2.49538e+08	1.97765e+08	2.14029e+08	2.17103e+08	7.12279e+07	4.79951e+07	1.1049e+08	3.15303e+07	8.57437e+07	1.87607e+08	9.2812e+07
V192	HESI(+)	531.27	1.35	1.14	M+Na	LPG(18:2)	LPG 18:2	4.45373e+07	3.8324e+07	1.10497e+08	3.37548e+07	5.41943e+07	2.2368e+07	3.81576e+07	4.88497e+07	4.02242e+07	8.02956e+07	7.44907e+07	2.0053e+07	3.76645e+07	1.65816e+08	195010071	1.42195e+08	6.45847e+07	4.15001e+07	2.70892e+07	3.52504e+07	2.44937e+07	6.67178e+07	5.28348e+07	3.21239e+07	2.85837e+07	5.99663e+07	7.15855e+07	4.66047e+07	9.92301e+07	9.9515e+07	7.45987e+07	6.53378e+07	6.82458e+07	1.08012e+08	7.40139e+07	2.84193e+07
V193	HESI(+)	532.337	1.95	1.78	M+Na	LPC(17:0)	LPC 17:0	6837211417	5272870916	5642272714	7103174555	13676755158	3254853941	3682922831	4576844866	4642506667	5342819605	6059737367	3584844837	2463401333	3323524100	2334610495	2233708378	1638890876	1780553678	4583198299	5452603794	4435956368	3617261619	9359403521	5206495163	3899506030	2939073600	3062371037	2235487418	2790050984	1986848835	1983411691	2506055561	1871625310	1970368607	1340531374	9.06732e+08
V194	HESI(+)	532.436	2.67	2.54	M+H	CAR(26:4)	CAR 26:4	0	0	1.98531e+06	3.03155e+06	150060	0	2.86785e+06	4.4365e+06	1.97016e+06	3.97404e+06	6.50674e+06	3.88885e+06	3.43492e+07	1.83938e+07	6.56982e+06	1.58984e+07	5.33496e+06	1.02913e+07	177387	0	0	0	0	969853	3.07693e+06	2.247e+06	1.33083e+06	2.81369e+06	1.10524e+06	1.15373e+06	4.59173e+06	5.56085e+06	2.56012e+07	7.74381e+06	4.89459e+06	1.95343e+07
V195	HESI(+)	533.381	5.32	4.6	M+H	TG(19:4_5:0_5:0)	TG 29:4	1.8256e+07	2.25478e+07	3.39421e+07	2.78753e+07	3.10782e+07	2.91267e+07	3.65302e+07	3.61767e+07	3.95451e+07	4.04185e+07	2.91893e+07	5.72913e+07	9.96195e+06	6.27431e+06	3.96969e+06	6.85438e+06	2.28347e+06	7.36544e+06	5.41436e+07	8.34935e+07	5.07955e+07	4.08286e+07	7.36457e+07	5.88619e+07	2.61221e+07	7.06905e+07	8.6251e+07	1.13597e+08	1.48551e+08	5.4743e+07	10002358	7.96876e+06	3.73201e+06	5.87737e+06	1.03384e+07	2.10717e+06
V196	HESI(+)	534.321	1.14	0.94	M+H	LPC(19:2)	LPC 19:2	1.87947e+06	3.30997e+06	5.79221e+06	2.73932e+06	3.30095e+06	2.91878e+06	9.01687e+06	3.64443e+06	2.55562e+06	3.56165e+06	3.96338e+06	5.06736e+06	507962	1.99089e+06	1.69869e+06	1.43495e+06	335623	696106	1.85532e+06	4.82346e+06	1.55321e+06	783845	3.74113e+06	4.55934e+06	4.2868e+06	4.79437e+06	2.15292e+06	1.41256e+06	7.70754e+06	452487	91236.1	0	546658	129569	275193	173388
V197	HESI(+)	534.355	1.69	1.5	M+H	LPC(19:2)	LPC 19:2	2.53209e+07	1.86534e+07	4.55856e+07	5.22807e+07	2.60927e+07	1.64719e+07	4.08059e+07	2.69458e+07	4.64302e+07	4.20078e+07	4.10579e+07	3.43879e+07	3.94953e+06	1.36034e+07	1.17504e+07	4.65577e+06	2.38267e+06	7.96957e+06	1.619e+07	1.20612e+07	1.29911e+07	1.42669e+07	2.03712e+07	1.80125e+07	2.15323e+07	2.33516e+07	1.93989e+07	1.65442e+07	2.00833e+07	1.78179e+07	4.35984e+06	4.61262e+06	4.49659e+06	7.17621e+06	1.51971e+07	8.84716e+06
V198	HESI(+)	536.373	1.98	1.82	M+H	LPC(19:1)	LPC 19:1	1.98642e+08	1.56772e+08	1.15781e+08	1.09385e+08	7.96673e+07	1.30905e+08	4.3508e+07	4.14324e+07	5.06567e+07	5.69391e+07	8.25544e+07	3.98446e+07	2.32155e+07	2.23604e+07	2.54525e+07	1.6648e+07	14693042	2.16144e+07	2.29876e+07	9.89747e+07	2.57772e+07	2.15647e+07	4.56083e+07	2.51022e+07	1.38878e+08	4.09724e+07	3.56087e+07	2.47461e+07	3.74311e+07	2.4707e+07	1.64328e+07	1.75154e+07	2.61268e+07	1.865e+07	3.27759e+07	9.74418e+06
V199	HESI(+)	536.373	2.05	1.89	M+H	LPC(19:1)-2	LPC 19:1	6.62878e+07	1.61655e+08	5.82839e+08	5.93404e+08	3.98231e+08	4.96472e+07	3.15417e+08	2.46934e+08	3.7613e+08	3.65604e+08	668130026	365783653	1.47692e+08	122798321	1.42936e+08	9.67204e+07	7.57076e+07	1.73649e+08	1.06461e+08	5.80771e+07	1.16645e+08	1.05997e+08	1.74809e+08	1.0237e+08	1.43344e+08	2.29532e+08	1.66997e+08	1.34933e+08	2.02601e+08	1.47796e+08	8.16203e+07	1.30723e+08	1.51485e+08	1.34124e+08	2.15084e+08	6.43584e+07
V200	HESI(+)	536.409	3.31	3.16	M+H	LPC(P-20:0)	LPC O-20:1	3.45824e+06	2.81877e+06	3.60475e+06	3.58406e+06	9.45918e+06	2.00265e+06	2.51981e+06	1.78107e+06	2.45317e+06	2.74775e+06	6.36662e+06	2.07628e+06	1.79128e+06	1.1943e+06	3.12366e+06	1.6598e+06	1.44462e+06	2.82183e+06	3.98041e+06	8.20947e+06	2.72555e+06	3.33697e+06	1.29947e+07	8.71306e+06	2.5112e+06	761367	911304	2.08463e+06	1.61044e+06	685135	4.15306e+06	3.20644e+06	3.13408e+06	6.82271e+06	3.62754e+06	3.83266e+06
V201	HESI(+)	536.467	4.98	4.42	M+H	Cer(d18:2/16:0)	Cer 34:2	79840	604528	1.61516e+06	618262	741799	1.18809e+06	648921	896879	359813	216401	101820	1.69278e+06	26940.8	0	0	12849.6	0	0	1.52873e+06	1.81349e+06	1.23383e+06	1.00393e+06	2.70949e+06	529990	148003	2.36085e+06	2.35251e+06	2.62816e+06	4.26537e+06	1.03634e+06	0	0	0	8154.81	0	0
V202	HESI(+)	536.506	7.43	5.59	M+H	Cer(d18:2_16:0)	Cer 34:2	7.75689e+06	6.8924e+06	5.05467e+06	2.83997e+06	4.27421e+06	3.59319e+06	7.49504e+06	9.29368e+06	4.18218e+06	6.19428e+06	5.45869e+06	2.78686e+06	1.24349e+07	2.23815e+07	1.28506e+07	1.28958e+07	1.07568e+07	1.24537e+07	3.69629e+06	3.37397e+06	7.03183e+06	3.73013e+06	2.15101e+06	2.7123e+06	1.63328e+07	9.34972e+06	9.49203e+06	6.86314e+06	0	6.36008e+06	3.22622e+07	2.40502e+07	1.23695e+07	1.82998e+07	1.31963e+07	5.35162e+06
V203	HESI(+)	538.387	2.53	2.39	M+H	LPC(19:0)	LPC 19:0	1599791776	1391996852	1631059553	1727267519	2523312859	1441363519	1069496186	978116258	1068022657	1129463461	1463092301	1012759838	802114027	7.67209e+08	8.52386e+08	7.91297e+08	7.4505e+08	8.91835e+08	8.7257e+08	9.3182e+08	9.7403e+08	9.40514e+08	1204495765	8.74207e+08	7.32004e+08	9.22286e+08	1013737918	8.61732e+08	8.67451e+08	1038681504	7.65952e+08	8.03176e+08	9.14568e+08	8.75248e+08	7.30532e+08	6.39999e+08
V204	HESI(+)	538.423	3.36	3.2	M+H	LPC(O-20:0)	LPC O-20:0	2.28716e+07	2.36374e+07	3.94162e+07	4.56175e+07	4.83053e+07	2.95306e+07	1.50698e+07	1.36668e+07	1.89652e+07	1.7255e+07	2.32323e+07	1.71687e+07	3.20924e+06	2.95994e+06	3.31449e+06	2.68958e+06	1.53037e+06	3.95198e+06	3.15687e+07	4.13266e+07	3.27844e+07	3.14076e+07	6.21289e+07	4.02927e+07	1.60722e+07	2.0173e+07	1.44916e+07	1.73957e+07	1.98081e+07	1.16049e+07	6.71294e+06	5.97451e+06	3.31474e+06	6.57118e+06	1.47156e+07	6.81137e+06
V205	HESI(+)	538.518	9.22	7.17	M+H	Cer(d18:1/16:0)	Cer 34:1	7.82238e+06	1.02148e+07	1.06696e+07	1.11449e+07	9.97459e+06	8.47947e+06	7.79674e+06	117172	7.13865e+06	6.7672e+06	3.4901e+06	2.954e+06	1.48114e+06	2.12931e+06	974156	5.47465e+06	4.09297e+06	39519.6	1.57078e+07	1.54964e+07	1.78024e+07	1.93591e+07	1.63471e+07	1.59131e+07	2.89399e+06	1.81491e+07	2.19363e+07	1.90168e+07	1.90398e+07	7.98834e+06	3.08549e+06	239060	391191	1.0748e+07	35593.1	0
V206	HESI(+)	538.521	8.26	6.16	M+H	Cer(d18:1_16:0)	Cer 34:1	2.20106e+08	1.75141e+08	8.50453e+07	1.38157e+08	1.80969e+08	7.03153e+07	4.20798e+08	4.61819e+08	287127846	3.25389e+08	2.4539e+08	1.92662e+08	3.52141e+08	8.15349e+08	4.05248e+08	5.64062e+08	2.79882e+08	2.57534e+08	1.16491e+08	2.27255e+08	2.19302e+08	1.10314e+08	2.46536e+08	2.07071e+08	2.12506e+08	3.1504e+08	2.63971e+08	173436018	1.57012e+08	1.98876e+08	7.10107e+08	5.48941e+08	5.85887e+08	5.83785e+08	4.43611e+08	1.94788e+08
V207	HESI(+)	540.535	10.04	8.42	M+H	Cer(d18:0/16:0)	Cer 34:0	925838	3.31751e+06	6.42695e+06	642532	1.44673e+06	1.4985e+06	0	5.54488e+06	2.7581e+06	149272	0	5.45459e+06	0	0	1.43241e+06	1.18222e+06	32506.3	0	1.27577e+06	1.45546e+06	8.52121e+06	2.68148e+06	3.25493e+06	2.6261e+06	3.19133e+06	4.02866e+06	1.43215e+07	4.64553e+06	1.45007e+07	1.77528e+07	0	1.0571e+06	1.97592e+06	0	2.32348e+06	0
V208	HESI(+)	540.536	8.58	6.46	M+H	Cer(d18:0_16:0)	Cer 34:0	6.56409e+07	5.09334e+07	1.66192e+07	1.59346e+07	2.6926e+07	2.09159e+07	3.0874e+07	1.95634e+07	2.89228e+07	2.40392e+07	2.8166e+07	1.87569e+07	3.72485e+07	8.99179e+07	8.97306e+07	9.2874e+07	8.23358e+07	6.02117e+07	1.08573e+07	2.96768e+07	1.65627e+07	1.03988e+07	1.28639e+07	8.26151e+06	6.06588e+07	3.04193e+07	4.99071e+07	2.49231e+07	9.50707e+06	1.5107e+07	152707493	1.02674e+08	9.34784e+07	7.79513e+07	9.45461e+07	1.12363e+08
V209	HESI(+)	541.398	1.97	1.8	M+H	VAE(16:3)	VAE 16:3	1.98842e+06	654674	6.80356e+06	3.17343e+06	716159	2.49699e+06	0	936240	690567	536453	0	0	946965	947537	674404	1.353e+06	303869	1.07331e+06	3.34228e+06	605327	2.83359e+06	977547	1.92149e+06	1.42135e+06	800787	1.46927e+06	5.74412e+06	4.17457e+06	4.51636e+06	3.03112e+06	922628	1.91132e+06	4.71271e+06	1.09692e+06	487342	954330
V210	HESI(+)	542.321	1.62	1.42	M+H	LPC(20:5)-2	LPC 20:5	4395050407	5298139723	3250752954	3649137579	5690800491	5430094818	2666658282	3063905313	3036955548	3368606474	3092465529	3054652073	2434191344	3469998895	2458239515	2382858193	2336115239	2347429476	5656608028	3968203974	5373901149	5065399030	6381412867	5346514524	2359333946	2595427665	3369270999	2683375064	2972438926	3941042539	1564601750	2036038756	2145729345	2172364549	2318049319	1684743326
V211	HESI(+)	542.322	2.14	1.98	M+Na	LPC(18:2)	LPC 18:2	4.52828e+08	5.54731e+08	6.87222e+08	6.06747e+08	5.17405e+08	3.61687e+08	3.37482e+08	2.95254e+08	3.15341e+08	3.8314e+08	6.36524e+08	3.19346e+08	1.28992e+08	1.89215e+08	1.23213e+08	1.31176e+08	9.32385e+07	1.37881e+08	3.35471e+08	2.31573e+08	2.55195e+08	2.02822e+08	5.22493e+08	3.42636e+08	2.89988e+08	1.93931e+08	213364587	2.8274e+08	272347876	1.99892e+08	6.55645e+07	8.55919e+07	8.11395e+07	1.07253e+08	1.07945e+08	1.11362e+08
V212	HESI(+)	542.322	1.93	1.75	M+Na	LPC(18:2)-2	LPC 18:2	1442209162	1642465140	8.41584e+08	1167915213	1436852034	7.21844e+08	1436825954	9.21233e+08	8.34456e+08	1516828482	1287716073	723260754	4.12356e+08	5.87249e+08	3.17749e+08	3.76586e+08	2.33993e+08	234114486	1082487250	1299348502	7.85479e+08	5.77472e+08	1729748183	1330627527	1617220264	770977652	6.62353e+08	6.64995e+08	8.37373e+08	3.78616e+08	2.32907e+08	3.52293e+08	1.98866e+08	2.95264e+08	2.72815e+08	2.27894e+08
V213	HESI(+)	542.324	1.38	1.17	M+H	LPC(20:5)	LPC 20:5	4023345401	4051772822	4405877201	3730412286	2971713969	2429248737	2723256545	2783136713	2843191118	2983999033	2643623620	1889505146	7.08963e+08	7.23001e+08	884375511	4.66679e+08	3.62624e+08	5.07281e+08	4040756281	2759403115	4279958053	3078325602	4174270391	1859208630	1432323030	2092888157	3090937128	1620343112	2334176987	1400394742	3.44438e+08	489613245	4.2518e+08	4.58777e+08	441725203	177716745
V214	HESI(+)	544.337	1.88	1.7	M+H	LPC(20:4)-2	LPC 20:4	26798504113	29670630644	32107363427	40975690383	40715246751	20322623593	40827229700	42648699758	42925703397	49435892793	48559876879	37453166756	35535788948	33273481517	30586868115	34887903215	33455720313	30657601722	34909332063	28826887869	29213959088	23669286021	41396955780	34851361560	27118583481	30530418800	29310150744	28572081250	31588949439	24982318639	21564712587	33193887004	28204373214	31048284737	30629616583	26405463809
V215	HESI(+)	544.339	1.54	1.35	M+H	LPC(20:4)	LPC 20:4	14961167976	15742019737	19819100172	22615510736	16146096411	12310363189	35709256549	33697122626	33731645768	34512617683	25714916682	26933933916	25492953158	26361171023	26457565992	26525335795	18643548619	22407328755	20917142989	22678448822	20618115856	16527657674	22118723140	20184544126	21469035842	31892014377	28620230420	27238274286	30648562301	24516978718	21665646290	29904608134	25486114415	24257045373	25075011621	21217263799
V216	HESI(+)	544.34	2.32	2.18	M+Na	LPC(18:1)-2	LPC 18:1	475088958	5.34478e+08	9.48898e+08	9.42603e+08	6.26752e+08	2.61308e+08	1210376093	9.02492e+08	1109355557	1333392019	2033970888	1034080581	6.87699e+08	7.10103e+08	8.18098e+08	6.35822e+08	460538767	7.03023e+08	3.29144e+08	6.46973e+08	3.44671e+08	2.46103e+08	6.13751e+08	4.60888e+08	1034591680	8.71166e+08	5.42526e+08	569435918	7.26084e+08	3.92808e+08	4.63271e+08	5.94636e+08	5.11971e+08	6.02249e+08	6.57731e+08	6.40558e+08
V217	HESI(+)	546.284	1.31	1.1	M+H	LPS(20:4)	LPS 20:4	1.40639e+07	1.19718e+07	5.49801e+07	1.65057e+07	1.12288e+07	1.43166e+07	5.02502e+07	5.88477e+07	4.05423e+07	3.8563e+07	2.622e+07	3.15732e+07	2.55656e+07	5.09867e+07	3.93994e+07	3.44872e+07	1.37408e+07	3.05572e+07	2.81659e+07	6.02489e+07	4.32617e+07	2.09022e+07	2.8983e+07	2.80182e+07	7.3795e+07	7.22817e+07	5.88114e+07	5.11388e+07	6.32155e+07	4.24959e+07	2.90779e+07	5.29428e+07	3.42487e+07	3.56922e+07	2.08197e+07	3.73264e+07
V218	HESI(+)	546.353	2.18	2.02	M+Na	LPC(18:0)	LPC 18:0	53765295851	49427504099	39795862972	36475607899	35085325604	38015464182	33205569625	30164855471	39448528041	39326661181	49538560166	35721950499	31650393856	32883582636	33277565647	37350025564	31694664618	34466064228	30495033416	32921152277	26680899753	23586937420	33967054951	29618981529	54719926754	28477613499	23884435930	34979784936	26799759483	40328601239	34586344343	33583730372	30442976090	28805455125	24717951349	34952389464
V219	HESI(+)	546.357	1.65	1.46	M+H	LPC(20:3)	LPC 20:3	10307479081	10547601019	14071868040	15526287165	12119783190	8209805700	15290366577	7594432377	13003136720	14225940023	15726274886	12429035960	7081606360	4728447490	9006971016	5766451560	6304747786	8296638491	8124665492	8017020467	7270242657	5764834409	8627523704	8487860585	13423153972	11573355466	9743347990	10662014506	11882230689	6334151562	7225776307	9273324203	7468411494	8287976799	9266281025	8735462619
V220	HESI(+)	547.448	10.54	9.25	M+Na	WE(O-16:2_20:4)	WE O-36:6	6.47244e+06	1.06073e+07	4.69872e+07	5.52622e+07	6.79829e+07	1.09055e+07	8.07731e+06	4.68854e+07	1.01746e+07	8.35106e+06	6.82538e+06	7.80051e+06	0	0	0	0	0	0	5.63467e+07	5.5599e+07	1.38432e+07	1.58765e+07	4.88694e+07	5.40249e+07	5.09666e+06	6.10734e+06	6.91369e+06	6.54633e+07	5.51075e+07	7.96916e+07	0	0	0	0	0	0
V221	HESI(+)	548.312	1.95	1.78	M+Na	LPC(P-20:5)	LPC O-20:6	1.21248e+08	8.05472e+07	1.11288e+08	1.27236e+08	2.91294e+08	5.66514e+07	6.41903e+07	7.33203e+07	9.35296e+07	7.61543e+07	1.09001e+08	5.84121e+07	5.09803e+07	6.69324e+07	5.07969e+07	5.06335e+07	5.04462e+07	3.23738e+07	1.13348e+08	9.75747e+07	109046713	1.16629e+08	1.68756e+08	8.89425e+07	1.1159e+08	9.42326e+07	3.02249e+07	2.6887e+07	8.23711e+07	2.2486e+07	2.67675e+07	2.29175e+07	2.63428e+07	1.05573e+08	2.55662e+07	1.77091e+07
V222	HESI(+)	548.37	1.87	1.7	M+H	LPC(20:2)	LPC 20:2	1350533253	1225844071	6.35743e+08	7.18473e+08	4.96956e+08	8.38232e+08	2943427086	5.27342e+08	5.38033e+08	6.08746e+08	6.80869e+08	4.17637e+08	2.7268e+08	1189770612	3.0234e+08	2.71515e+08	2.52058e+08	1055308289	6.85319e+08	3.65822e+08	272863147	666443258	4.03748e+08	8.91372e+08	1412531623	1563903843	4.37228e+08	4.49245e+08	1388033620	1011129507	8.29059e+08	3.19851e+08	9.61813e+08	919261479	4.21571e+08	6.95008e+08
V223	HESI(+)	548.37	1.93	1.75	M+H	LPC(20:2)	LPC 20:2	1396334121	1333333666	2521413018	2873108583	2553719761	9.7946e+08	3216451459	2445332459	2528509643	3162433524	5125526393	2281958606	1094210563	1279804115	1040048180	9.46996e+08	8.21441e+08	1167706655	7.47369e+08	7.35539e+08	8.10233e+08	7.08112e+08	1301769300	9.07682e+08	4.95088e+08	1725209926	1275317923	1269407257	1431479297	1034217560	2.89718e+08	1116155227	1048222171	9.37183e+08	1410084076	7.47506e+08
V224	HESI(+)	548.54	9.21	7.16	M+H-H2O	Cer(d18:1_18:0)	Cer 36:1	2.90493e+08	2.62319e+08	1.10178e+08	1.4877e+08	1.48636e+08	125801637	1.76472e+08	3.02428e+08	2.86888e+08	1.99171e+08	1.48871e+08	2.17631e+08	4.8508e+08	9.7018e+08	4.56247e+08	6.35798e+08	5.43871e+08	4.7413e+08	2.62413e+08	387910128	2.63354e+08	158059055	2.82259e+08	3.57171e+08	2.86004e+08	3.16668e+08	254495771	2.80843e+08	2.3006e+08	1.49841e+08	8.83526e+08	5.56049e+08	4.84053e+08	5.72207e+08	5.85967e+08	7.88011e+08
V225	HESI(+)	549.468	6.27	5.03	M+H	VAE(18:2)	VAE 18:2	549859	238037	2.63569e+06	12107.3	418798	1.46877e+06	182088	639168	1.0513e+06	868532	0	2.52192e+06	0	5958.46	7669.5	115253	141892	0	0	755227	23026.9	251319	831066	484630	174126	1.58335e+06	1.9602e+06	345063	4.84659e+06	1.96772e+06	31832.4	227557	42526.7	172465	0	0
V226	HESI(+)	550.388	2.32	2.17	M+H	LPC(20:1)-2	LPC 20:1	1567726372	1795964021	4456650433	5164672245	4783362147	1414933049	6614599359	2320491116	4067837176	4582228807	11503849579	4115582596	1983563306	1519405163	2536605280	1852284427	2096338294	3141150836	8.18163e+08	6.02068e+08	7.3969e+08	6.52301e+08	1221526619	8.42036e+08	1373349931	1915822571	1519746765	1790733656	2116412350	9.38766e+08	1800150013	2604051259	2520593954	1875044857	3511588215	1636536952
V227	HESI(+)	551.482	8.97	6.87	M+H	VAE(18:1)	VAE 18:1	8.37268e+06	1.34467e+07	7.21895e+06	9.3388e+06	6.05662e+06	1.14047e+07	2.63411e+07	2.07955e+07	6.43673e+06	4.3243e+06	0	2.7833e+07	396463	0	23273.8	41491.5	3.8768e+06	17331.4	9.22194e+06	3.77571e+07	8.80543e+06	4.92615e+06	4.83538e+07	8.69426e+06	2.68718e+06	4.23618e+07	4.23037e+07	3.15568e+07	1.02416e+08	3.00782e+07	534139	286488	212440	675765	291398	89779
V228	HESI(+)	552.402	2.95	2.82	M+H	LPC(20:0)	LPC 20:0	2057284920	1832470449	9.74216e+08	9.58932e+08	2252733329	1733144670	6.56152e+08	2.18233e+08	3.01076e+08	3.37764e+08	8.13803e+08	2.58927e+08	1.39065e+08	144297604	1.8028e+08	1.41848e+08	1.63243e+08	1.7161e+08	1.17781e+08	9.3464e+07	1.49075e+08	1.34358e+08	1.92665e+08	1.21447e+08	6.27936e+08	1.37348e+08	1.17522e+08	9.2089e+07	1.27385e+08	2.12286e+08	1.00776e+08	1.59767e+08	1.34553e+08	1.04638e+08	1.51861e+08	9.36612e+07
V229	HESI(+)	553.386	5.18	4.53	M+Na	DG(10:0_20:5)	DG 30:5	5.20241e+06	7.8308e+06	7.62832e+06	9.08955e+06	6.64853e+06	1.20363e+07	1.09296e+07	1.1123e+07	1.61918e+07	6.3215e+06	3.97691e+06	1.55376e+07	1.14669e+06	774663	590510	2.04327e+06	0	138684	6.51113e+06	1.35172e+07	5.20965e+06	3.06872e+06	6.90625e+06	7.56738e+06	1.40698e+07	6.84545e+06	5.32002e+06	2.63977e+07	2.2976e+07	5.05459e+06	0	0	0	219002	0	0
V230	HESI(+)	554.325	1.51	1.31	M+H	LPC(21:6)	LPC 21:6	2.64047e+07	2.63752e+07	5.56683e+06	6.20231e+06	9.2222e+06	1.39042e+07	1.06155e+07	5.99955e+06	7.70168e+06	1.34949e+07	1.17513e+07	7948.29	1.00586e+07	1.73147e+07	1.24921e+07	1.77194e+07	1.52561e+07	1.47718e+07	1.57946e+07	2.3822e+07	2.08638e+07	2.17369e+07	1.59336e+07	1.88711e+07	2.12391e+07	4.57366e+06	1.18354e+07	1.0354e+07	1.35596e+07	2.21136e+06	6.94581e+06	5.29893e+06	1.3814e+07	1.43546e+07	1.70357e+07	1.47604e+07
V231	HESI(+)	555.44	6.25	5.02	M+Na	DG(P-15:2_16:1)	DG O-31:4	4.56879e+07	3.03968e+07	8.88147e+07	4.15015e+07	2.32858e+07	7.38686e+07	5.06573e+07	2.38228e+07	2.13844e+07	2.07461e+07	8.23975e+06	7.59696e+07	8.00583e+06	1.36087e+06	2.07344e+06	8.13284e+06	175003	805866	1.79901e+07	3.31982e+07	4.00819e+07	6.13148e+07	1.11762e+08	3.28748e+07	1.04257e+07	1.29056e+08	2.19735e+07	1.07912e+08	1.45167e+08	108727947	982892	502241	1.51178e+06	1.22541e+07	99700.2	0
V232	HESI(+)	555.44	5.66	4.76	M+Na	DG(P-8:0_23:3)	DG O-31:4	3.77191e+07	5.01864e+07	1.79849e+08	3.4329e+07	3.10851e+07	6.55194e+07	2.10071e+07	2.92171e+07	1.08023e+07	1.08449e+07	9.59415e+06	2.18811e+07	1.22752e+07	59026.5	2.55346e+06	2.53173e+07	259552	1.06331e+06	5.11017e+07	1.01947e+08	5.2463e+07	6.23313e+07	8.38045e+07	4.13983e+07	7.50924e+07	7.34189e+07	1.03486e+08	3.13623e+07	5.82113e+07	5.01035e+07	817936	8607.81	799548	1.92698e+07	534217	0
V233	HESI(+)	556.34	1.46	1.26	M+H	LPC(21:5)	LPC 21:5	1.64474e+07	2.15885e+07	1.71142e+07	21337524	1.57528e+07	1.22126e+07	9.32254e+06	6.09475e+06	7.20023e+06	7.34025e+06	1.00603e+07	6.56547e+06	930415	3.96539e+06	2.88815e+06	1.47287e+06	896959	1.5485e+06	9.13993e+06	7.13235e+06	6.69366e+06	9.32572e+06	1.41474e+07	7.98503e+06	8.11641e+06	4.71842e+06	2.55944e+06	4.85042e+06	9.97482e+06	4.84932e+06	4.3144e+06	4.55516e+06	3.98789e+06	2.81376e+06	2.55504e+06	6.64993e+06
V234	HESI(+)	556.375	2.15	1.99	M+H	LPC(P-22:4)	LPC O-22:5	1.37157e+07	1.66335e+07	4.30464e+07	4.63995e+07	4.78848e+07	1.89581e+07	7.45143e+06	8.58438e+06	1.8112e+07	1.41368e+07	3.41571e+07	1.00463e+07	3.8513e+06	2.66578e+06	6.07418e+06	3.69465e+06	3.02764e+06	2.22021e+06	1.69059e+07	1.21661e+07	1.053e+07	1.26667e+07	2.36671e+07	1.51371e+07	8.71079e+06	8.47679e+06	7.6423e+06	1.18334e+07	7.92695e+06	1.37475e+07	3.16203e+06	3.74897e+06	630314	4.81346e+06	5.40277e+06	4.78537e+06
V235	HESI(+)	557.288	1.3	1.1	M+H	LPG(22:6)	LPG 22:6	952481	452786	2.81387e+06	1.53426e+06	694449	477889	4.88207e+06	1.44466e+07	3.76239e+06	4.64484e+06	1.43944e+06	3.92703e+06	2.99274e+07	2.78775e+07	3.66914e+07	1.89175e+07	1.4722e+07	1.45509e+07	840192	7.22406e+06	2.93153e+06	6.13673e+06	4.08113e+06	3.11599e+06	345803	1.1665e+07	1.93113e+07	5.48798e+06	5.483e+06	9.14999e+06	3.03128e+07	1.4498e+07	5.80615e+07	6.03e+07	3.9571e+07	1.02662e+07
V236	HESI(+)	557.457	6.27	5.03	M+Na	DG(P-9:0_22:2)	DG O-31:3	1.95648e+08	3.69639e+08	4.79798e+08	3.52065e+08	2.19851e+08	4.55049e+08	7.57086e+08	7.5864e+08	1.95379e+08	2.01211e+08	1.07241e+08	1073883867	7.53249e+07	1.46851e+07	2.02834e+07	7.51984e+07	415217	2.26935e+07	3.11076e+08	7.55896e+08	5.659e+08	4.29882e+08	9.36498e+08	2.67032e+08	1.27987e+08	1490401166	1862683223	1030927588	2225943221	7.80571e+08	6.01248e+06	5.72814e+06	8.80403e+06	7.0062e+07	1.39041e+07	5502.69
V237	HESI(+)	557.457	5.95	4.89	M+H	DG(O-13:0_20:6)	DG O-33:6	6.14862e+08	9.54855e+08	1607931475	1197569048	8.61242e+08	9.96806e+08	7.3789e+08	1453492801	468787762	3.99708e+08	251351824	8.87868e+08	9.90736e+07	2.13412e+07	1.93905e+07	7.68022e+07	2.85349e+06	2.5521e+07	1178472596	1736965438	1545838971	1536981726	2282925358	8.38724e+08	2.08869e+08	2477523391	3165624281	2336349760	3360909631	2656647862	1.97125e+07	1.36917e+07	2.40429e+07	1.97002e+08	1.96395e+07	841930
V238	HESI(+)	557.457	7.74	5.78	M+H	DG(O-15:2_18:4)	DG O-33:6	1.60778e+07	3.12471e+07	4.82305e+06	7.64509e+06	6.18615e+06	5.80527e+07	1.00277e+07	1.16087e+07	3.46568e+06	3.01453e+06	0	8.8768e+06	0	0	0	1.8271e+06	0	0	3.01151e+07	3.09953e+07	3.59597e+07	2.93539e+07	6.64821e+07	6.06096e+06	5.25094e+06	7.25873e+07	7.56326e+07	2.4493e+07	3.06593e+07	1.3562e+07	0	0	0	2.12862e+06	0	0
V239	HESI(+)	558.353	2.11	1.95	M+H	LPC(21:4)	LPC 21:4	9.14963e+07	6.88446e+07	723265122	4.96767e+08	2.62807e+08	122789423	5.84433e+07	5.28668e+07	8.61287e+07	104163754	2.37719e+08	3.8041e+08	1.23267e+08	1.0448e+08	1.19283e+08	9.47963e+07	8.51825e+07	127438617	7.25991e+07	2.90924e+07	8.27515e+07	9.58567e+07	7.48948e+07	112520278	2.35529e+07	8.4342e+07	1.75805e+08	1.03665e+08	1.1987e+08	2.1351e+08	2.16345e+07	4.4949e+07	4.58785e+07	1.30992e+08	1.95368e+08	5.39599e+07
V240	HESI(+)	558.353	2.05	1.89	M+Na	LPC(19:1)-2	LPC 19:1	2.8186e+07	15940649	2.12816e+08	1.36846e+08	7.1182e+07	1.22489e+07	2.79366e+08	1.47116e+08	3.41201e+08	3.86841e+08	844286042	3.60616e+08	1.35245e+08	3.34381e+07	1.11784e+08	3.0515e+07	2.1427e+07	157999359	1.08918e+07	1.04999e+07	1.05445e+07	9.77036e+06	2.11077e+07	11194813	2.23743e+07	1.12078e+08	4.07368e+07	3.35879e+07	50645263	2.54608e+07	1.73862e+07	7.78778e+07	1.01282e+08	3.85344e+07	6.63379e+07	1.81596e+07
V241	HESI(+)	558.354	1.96	1.79	M+Na	LPC(19:1)	LPC 19:1	2.81639e+08	1.78007e+08	1.69137e+08	2.69035e+08	3.23805e+08	7.78574e+07	4.57345e+07	1.11518e+08	7.44814e+07	5.47344e+07	7.54476e+07	4.50589e+07	3.2674e+07	1.10544e+08	32919194	2.92512e+07	2.75279e+07	3.78253e+07	1.44084e+08	8.64525e+07	7.02596e+07	4.7577e+07	1.57849e+08	114484394	2.13064e+08	6.26828e+07	5.42479e+07	3.92053e+07	5.08134e+07	2.96544e+07	6.90384e+07	4.34922e+07	2.10092e+07	2.58891e+07	2.04291e+07	1.21498e+07
V242	HESI(+)	560.311	1.87	1.69	M+Na	LPC(P-21:6)	LPC O-21:7	5.73857e+08	5.82631e+08	8.41299e+08	9.68025e+08	1024370792	4.7465e+08	9.52911e+08	1070807270	1009108798	1119793071	1151189306	8.65921e+08	1084726343	9.4053e+08	850010096	9.32415e+08	9.01248e+08	8.26448e+08	7.80245e+08	5.93812e+08	651420421	5.5978e+08	806539414	7.76322e+08	5.69588e+08	6.38807e+08	6.76635e+08	6.29012e+08	7.52271e+08	5.50668e+08	4.8535e+08	7.55343e+08	8.30001e+08	930840631	8.87438e+08	7.67006e+08
V243	HESI(+)	560.336	1.22	1.01	M+H	PC(18:3_2:0)	PC 20:3	4.95487e+06	9.41467e+06	3.9831e+07	7.41718e+06	9.89749e+06	1.38824e+06	4.82354e+07	2.11866e+07	1.11666e+07	3.93695e+07	3.98147e+07	7.82569e+06	2.28207e+06	2.21451e+06	4.22947e+06	5.38196e+06	8.03621e+06	1.18982e+07	1.03455e+07	7.25783e+06	4.08045e+06	896326	6.75547e+06	2.3022e+07	1.47557e+07	9.44378e+06	1.0231e+07	8.42723e+06	1.32118e+07	5.28415e+06	2.18902e+06	2.05595e+06	1.53065e+06	109407	825429	4.18853e+06
V244	HESI(+)	560.37	2.54	2.4	M+Na	LPC(19:0)	LPC 19:0	387749605	3.50325e+08	5.91447e+08	5.65782e+08	9.56326e+08	4.65744e+08	1.54409e+08	1.96994e+08	2.41339e+08	2.48026e+08	3.05276e+08	2.3229e+08	2.26308e+08	1.89736e+08	223730195	2.08034e+08	2.26433e+08	258188179	1.76773e+08	1.35649e+08	1.58077e+08	154876477	3.1555e+08	1.68356e+08	1.20147e+08	1.13355e+08	1.3685e+08	1.30445e+08	1.23147e+08	158931383	1.60604e+08	1.8568e+08	1.99024e+08	1.97381e+08	1.82715e+08	1.55579e+08
V245	HESI(+)	560.37	2.82	2.69	M+H	LPC(21:3)	LPC 21:3	1.62242e+07	2.0202e+07	2.48585e+07	2.37134e+07	7.11309e+07	1.48174e+07	1.08108e+07	9.42603e+06	1.53261e+07	2.47618e+07	4.16286e+07	1.53669e+07	1.58815e+07	1.23895e+07	1.31882e+07	1.09054e+07	1.08106e+07	1.46286e+07	1.45123e+07	8.41929e+06	7.75497e+06	6.31577e+06	1.89744e+07	1.70756e+07	8.01076e+06	7.01142e+06	6.43655e+06	1.06519e+07	9.46055e+06	9.02015e+06	6.48876e+06	1.3002e+07	1.07122e+07	1.50156e+07	8.86688e+06	1.36801e+07
V246	HESI(+)	560.37	2.37	2.22	M+H	LPC(O-22:3)	LPC O-20:1	5.51542e+07	4.0366e+07	3.40709e+07	3.90725e+07	6.83247e+07	1.13307e+07	1.31358e+08	8.69817e+07	1.20762e+08	1.07183e+08	2.21741e+08	9.901e+07	7.69779e+07	8.39791e+07	9.27585e+07	8.15212e+07	7.12768e+07	1.02093e+08	1.13756e+07	4.47477e+07	1.92331e+07	6.80063e+06	2.19117e+07	3.92924e+07	8.34813e+07	7.75777e+07	5.43398e+07	3.39969e+07	1.86946e+07	1.78052e+07	1.15785e+08	1.03163e+08	8.52008e+07	5.13971e+07	4.78906e+07	6.41801e+07
V247	HESI(+)	560.403	3.36	3.21	M+H	LPC(P-22:2)	LPC O-22:3	3.57999e+06	4.17907e+06	8.09344e+06	8.3638e+06	1.04847e+07	6.84947e+06	1.93939e+06	1.07237e+06	2.94041e+06	2.68804e+06	4.32888e+06	4.10881e+06	93498.6	77909.1	603513	133850	574973	165837	7.25841e+06	5.40016e+06	5.10087e+06	5.79316e+06	1.25335e+07	8.45251e+06	1.80547e+06	2.57653e+06	3.24098e+06	3.59247e+06	4.21742e+06	2.15462e+06	733641	89725.3	177370	111521	2.53299e+06	1.06692e+06
V248	HESI(+)	562.326	2.18	2.03	M+Na	LPC(P-21:5)	LPC O-21:6	7.44793e+08	6.46507e+08	8.03928e+08	7.07874e+08	746742157	6.56429e+08	559525737	4.66397e+08	4.28472e+08	5.62993e+08	563201588	5.49397e+08	6.5526e+08	4.79893e+08	4.2712e+08	6.90616e+08	6.40781e+08	4.1286e+08	5.98819e+08	6.42752e+08	3.69836e+08	6.57568e+08	5.45864e+08	7.75929e+08	7.45692e+08	3.72851e+08	3.43454e+08	633072036	5.44858e+08	6.90986e+08	6.22021e+08	4.85635e+08	4.22288e+08	3.53608e+08	5.66577e+08	4.70832e+08
V249	HESI(+)	564.306	1.66	1.47	M+Na	LPC(20:5)-2	LPC 20:5	1.09706e+07	1.22282e+07	0	2.36377e+06	4.43088e+06	5.60608e+06	2.99903e+06	3.94693e+06	4.38059e+06	6.70779e+06	4.09454e+06	2.11977e+06	1.97137e+06	0	3.54562e+06	0	0	0	3.03215e+07	4.08748e+06	1.63743e+07	1.66969e+07	1.03561e+07	6.72934e+06	0	1.43269e+06	9.86833e+06	37057.4	4.47372e+06	2.96012e+06	3.2576e+06	5.45267e+06	125827	3.2011e+06	0	1.9815e+06
V250	HESI(+)	564.307	1.38	1.17	M+Na	LPC(20:5)	LPC 20:5	1055213707	1129841213	1275912726	1045568776	9.08917e+08	8.12889e+08	6.68765e+08	7.55554e+08	8.24402e+08	8.73353e+08	8.32921e+08	5.75627e+08	2.19599e+08	1.82691e+08	2.37205e+08	1.3618e+08	1.12719e+08	1.40659e+08	1218364385	7.22339e+08	1151870347	8.87512e+08	1133993142	534792788	3.20573e+08	5.59305e+08	8.27308e+08	4.78731e+08	6.44663e+08	3.99231e+08	6.66005e+07	121666324	1.10504e+08	1.09241e+08	1.1367e+08	4.6649e+07
V251	HESI(+)	564.44	3.44	3.28	M+H	LPC(P-22:0)	LPC O-22:1	6.71259e+06	4.91201e+06	1.31237e+07	1.43269e+07	1.51295e+07	6.28518e+06	3.35358e+06	2.78626e+06	4.19241e+06	4.04868e+06	6.55079e+06	3.65846e+06	562545	745928	906003	759204	754816	1.04609e+06	1.01547e+07	1.03699e+07	1.0893e+07	8.1364e+06	2.25956e+07	1.36899e+07	4.23204e+06	4.05091e+06	4.20578e+06	3.40992e+06	5.39268e+06	3.80436e+06	1.60866e+06	1.15281e+06	721060	1.39066e+06	3.59123e+06	1.01011e+06
V252	HESI(+)	566.321	1.56	1.36	M+Na	LPC(20:4)	LPC 20:4	1468225152	1757582398	5.32997e+08	1831191153	4.57026e+08	1665916638	7.858e+08	1118289989	3365502669	9.08624e+08	5.48501e+08	2651575683	3390367594	3114421336	3217750177	3703702543	3292833451	2935076561	7.41823e+08	6.69227e+08	8.97358e+08	2418038986	5.96694e+08	680367005	4.41927e+08	2341634742	2611092884	2897659463	2659665117	3252943463	2380224141	3117027748	3318498128	3221872453	2961388022	2559105887
V253	HESI(+)	566.321	1.93	1.76	M+Na	LPC(20:4)-2	LPC 20:4	5.44882e+08	675734511	4.89745e+08	715767190	6.25058e+08	2.58303e+08	1499441304	1045707461	9.23973e+08	1777161364	1199066775	7.50009e+08	6.08815e+08	6.22168e+08	4.68564e+08	7.04971e+08	4.0915e+08	3.51249e+08	8.09138e+08	9.49141e+08	5.35762e+08	3.3563e+08	1101447628	8.84987e+08	1007413468	9.14473e+08	6.7244e+08	863647783	9.71674e+08	3.58634e+08	4.029e+08	6.43548e+08	334049381	5.27961e+08	4.49018e+08	3.70242e+08
V254	HESI(+)	566.419	3.39	3.24	M+H	LPC(21:0)	LPC 21:0	2.63035e+07	2.34628e+07	1.31552e+07	1.39365e+07	3.92453e+07	2.4402e+07	4.96604e+06	4.42884e+06	5.78928e+06	5.18055e+06	6.7145e+06	4.8723e+06	3.43895e+06	3.62866e+06	4.46637e+06	3.1892e+06	3.07734e+06	3.69402e+06	4.00829e+06	3.93227e+06	3.9753e+06	4.0233e+06	4.86594e+06	3.09494e+06	5.21763e+06	2.71966e+06	3.02727e+06	2.64986e+06	2.94215e+06	4.28653e+06	2.69159e+06	3.68922e+06	2.98258e+06	3.41966e+06	2.96157e+06	2.71808e+06
V255	HESI(+)	566.452	4.59	4.19	M+H	LPC(O-22:0)	LPC O-22:0	858939	959906	3.06207e+06	2.8144e+06	2.70099e+06	2.83111e+06	871022	1.08587e+06	1.12069e+06	933584	1.65407e+06	532279	406089	221418	371029	129676	27802.3	476088	1.51125e+06	931066	979524	1.1995e+06	2.91721e+06	2.00416e+06	399832	1.4003e+06	355074	1.14557e+06	309217	949263	284655	272104	216697	585182	1.83612e+06	440809
V256	HESI(+)	566.455	4.52	4.14	M+H	LPC(O-22:0)	LPC O-22:0	1.01755e+07	1.13336e+07	1.52157e+07	1.9119e+07	1.90234e+07	1.62246e+07	8.30995e+06	9.43165e+06	1.04375e+07	9.26371e+06	1.05559e+07	6.8321e+06	2.63548e+06	5.87189e+06	5.2574e+06	3.04575e+06	708462	2.86089e+06	9.90705e+06	1.2807e+07	1.5449e+07	1.61641e+07	2.28922e+07	1.21406e+07	6.87318e+06	1.05453e+07	7.29959e+06	6.51125e+06	7.0352e+06	6.8262e+06	3.07776e+06	3.61617e+06	6.97804e+06	9.95522e+06	1.77405e+07	3.13572e+06
V257	HESI(+)	566.491	4.49	4.12	M+H	Cer(d18:1/18:0)	Cer 36:1	544293	220053	167658	76462.1	402866	399643	90107.9	130266	164472	276264	156155	476584	0	0	0	0	0	0	4.41607e+06	1.31771e+06	600149	1.24464e+06	714682	1.84035e+06	115973	654930	2.58729e+06	946172	1.89778e+06	661605	0	0	0	0	0	0
V258	HESI(+)	566.551	9.21	7.16	M+H	Cer(d18:1_18:0)	Cer 36:1	1.78142e+08	1.78768e+08	8.0322e+07	9.88865e+07	107195093	7.77058e+07	1.25552e+08	1.91331e+08	1.90454e+08	1.5094e+08	9.47483e+07	1.55583e+08	2.91065e+08	6.36755e+08	2.99433e+08	4.19616e+08	3.40143e+08	3.01322e+08	1.74955e+08	2.91373e+08	1.9067e+08	1.15928e+08	2.08153e+08	2.32723e+08	2.0288e+08	2.19375e+08	1.55438e+08	2.05088e+08	1.41203e+08	9.8394e+07	5.9693e+08	3.64262e+08	3.50356e+08	3.5251e+08	398684186	5.65311e+08
V259	HESI(+)	566.551	9.96	8.28	M+H	Cer(d20:1_16:0)	Cer 36:1	8.42732e+07	125791869	5.37486e+07	7.4055e+07	8.08314e+07	8.3381e+07	6.75406e+07	4.56077e+07	5.66895e+07	4.78119e+07	1.71311e+07	6.43782e+07	5.23971e+06	2.39679e+06	7.31819e+06	2.41094e+07	0	3.87971e+06	1.36518e+08	2.08887e+08	1.90834e+08	206781980	1.50022e+08	8.79065e+07	3.21876e+07	2.47765e+08	2.38391e+08	1.71254e+08	1.43241e+08	1.3258e+08	0	3.85837e+06	0	7.62014e+06	1.00025e+07	1837.7
V260	HESI(+)	568.303	1.45	1.25	M+Na	LPC(20:3)	LPC 20:3	3.53282e+07	2.54084e+07	2.96487e+07	2.83556e+07	1.81747e+07	1.70005e+07	1.42846e+07	3.99539e+07	1.10952e+07	1.75383e+07	1.92584e+07	2.3324e+07	1.2354e+07	1.08972e+07	9.26458e+06	1.97612e+07	9.37692e+06	1.58387e+07	2.6529e+07	1.82228e+07	2.1064e+07	1.77449e+07	4.80561e+07	3.04712e+07	5.01584e+07	1.64739e+07	2.31434e+07	1.85913e+07	2.71321e+07	2.24393e+07	1.60181e+07	9.12227e+06	1.41485e+07	1.56694e+07	1.38255e+07	1.05648e+07
V261	HESI(+)	568.339	1.66	1.47	M+H	LPC(22:6)-2	LPC 22:6	4857794560	5225647376	4841888072	5604681323	7371938400	4726419567	4339629169	3242401099	4463309576	5918970437	6270152503	5132113741	4835944021	2304687127	4313435792	3755065325	4498641506	4639023807	5549795947	4970546423	5100514359	3458779257	6302527002	6110786907	4430144493	4091669448	4435445587	5375149876	5016288079	3054695192	2587836478	4151389608	3752531612	4637664882	4260621337	4221272340
V262	HESI(+)	568.339	1.48	1.28	M+H	LPC(22:6)	LPC 22:6	30325301653	28690166206	25205285597	27714611727	30601643031	22393185948	24972185945	28699446115	25163689467	25061601623	26813332983	19770625465	17094507608	18199906413	13491639354	15143651518	8648335475	15857081266	23165681121	25973247977	24755487767	19127564078	34146040431	27779400029	35639208442	18402395958	20209018863	24169974995	27147462137	19844466215	14183965486	13308038766	11813670048	12897866378	16261406954	15311822672
V263	HESI(+)	569.417	4.12	3.85	M+Na	TG(P-4:0_8:0_19:3)	TG O-31:4	1.27088e+07	3.09127e+07	2.53809e+07	2.18285e+07	2.19789e+07	5.46898e+07	4.2605e+07	4.96891e+07	2.19441e+07	1.87319e+07	8.62769e+06	7.26374e+07	4.51146e+06	0	1.08735e+06	6.89709e+06	0	938195	3.63939e+07	7.5015e+07	4.33843e+07	3.4868e+07	8.33434e+07	3.14709e+07	7.28934e+06	1.12351e+08	1.35138e+08	9.02009e+07	2.30514e+08	3.34837e+07	98585.1	0	0	5.38885e+06	424392	0
V264	HESI(+)	570.281	1.27	1.06	M+H	LPS(22:6)	LPS 22:6	3.57125e+07	2.68771e+07	6.4991e+07	2.23379e+07	2.28528e+07	3.46862e+07	1.92315e+07	2.91799e+07	1.17096e+07	1.60737e+07	1.13301e+07	1.4625e+07	1.21266e+07	3.28941e+07	3.83417e+07	2.11664e+07	1.48826e+07	1.5592e+07	2.17221e+07	3.8923e+07	4.63596e+07	3.92921e+07	2.70083e+07	2.6004e+07	1.43483e+08	2.68864e+07	2.83585e+07	1.97403e+07	2.4865e+07	3.26752e+07	2.2984e+07	2.06257e+07	2.52044e+07	1.71074e+07	2.54557e+07	1.73227e+07
V265	HESI(+)	570.353	1.93	1.76	M+H	LPC(22:5)-2	LPC 22:5	2884094400	2811061954	3246646154	4396209410	4656908429	1685165358	5616929780	5445457603	4794884510	6075906292	8345666316	3673337180	2150376315	2779108449	1930677536	2076231160	2042470662	1881815997	1683712511	1400248327	1725850886	1285656705	2747902844	2092148073	2510732968	3019567913	2222920983	2287944730	2220317283	1484961506	1592789854	2325088127	1869849386	1766640955	1861455859	1122409983
V266	HESI(+)	570.353	2.14	1.98	M+Na	LPC(20:2)-2	LPC 20:2	3.444e+07	5.47807e+07	1.12073e+08	1.22279e+08	7.40698e+07	3.57728e+07	5.89201e+07	4.85332e+07	5.75185e+07	8.10861e+07	1.05978e+08	8.73071e+07	4.06568e+07	2.27602e+07	2.93954e+07	3.36213e+07	2.84798e+07	4.97421e+07	2.18815e+07	2.03304e+07	1.64115e+07	1.50167e+07	3.05446e+07	1.99633e+07	3.97056e+07	3.6579e+07	1.99208e+07	4.29377e+07	3.9051e+07	3.07351e+07	1.64916e+07	2.9147e+07	2.59723e+07	2.53158e+07	4.95841e+07	4.68908e+07
V267	HESI(+)	570.356	1.67	1.48	M+H	LPC(22:5)	LPC 22:5	3.84987e+08	3.25942e+08	2248274996	2337073358	3.03752e+08	317146949	1519049603	1531515979	1925654897	2196567270	2659474888	1884314223	6.48116e+08	1113025777	9.68545e+08	9.11763e+08	616001266	1814055442	2.30034e+08	1.66644e+08	1.86879e+08	1.76853e+08	2.76324e+08	1.27267e+08	3309410643	808283899	8.89096e+08	1422451075	1114082116	1416488109	7.40708e+08	7.41266e+08	7.33181e+08	8.11011e+08	1110152067	2460654133
V268	HESI(+)	571.435	6.26	5.02	M+Na	TG(O-13:1_4:0_14:2)	TG O-31:3	8.14362e+07	7.46482e+07	1.1749e+08	5.65317e+07	3.91928e+07	1.63278e+08	6.21496e+07	134639958	6.36867e+07	3.68494e+07	1.07356e+07	1.24555e+08	1.20851e+07	1.39302e+06	3.37838e+06	2.15564e+07	228210	2.11469e+06	1.39672e+08	1.9506e+08	1.3454e+08	1.61212e+08	2.05729e+08	8.26688e+07	2.46759e+07	2.9219e+08	3.50281e+08	2.85351e+08	3.47384e+08	2.29773e+08	2.20179e+06	160222	2.71617e+06	2.94485e+07	1.23713e+06	0
V269	HESI(+)	571.436	5.9	4.87	M+Na	DG(17:1_14:2)	DG 31:3	3.37134e+07	1.98782e+07	2.64019e+07	6.84002e+07	1.06575e+07	4.00203e+07	2.20671e+07	1.27727e+08	1.48553e+07	2.98781e+07	2.15307e+07	2.67045e+07	2.48087e+06	1.03241e+06	1.21328e+06	6.6326e+06	0	849798	2.9234e+07	1.96297e+08	7.18677e+07	1.58856e+08	1.73141e+08	1.45946e+07	1.81897e+07	1.26192e+08	3.6813e+07	4.48662e+07	2.39727e+08	2.23064e+08	770158	258550	1.08938e+06	1.31064e+07	762494	157602
V270	HESI(+)	572.369	2.16	2.01	M+Na	LPC(20:1)	LPC 20:1	2.28628e+08	2.83813e+08	5.35423e+08	626465714	2.37091e+08	1.20892e+08	2.47386e+08	6.46621e+07	1.41157e+08	8.38399e+07	283370593	1.10353e+08	5.6912e+07	7.97659e+07	1.11335e+08	7.95241e+07	1.14519e+08	9.24339e+07	4.17482e+07	5.54963e+07	3.51666e+07	4.36965e+07	5.54693e+07	5.07524e+07	3.51147e+08	7.34788e+07	6.12963e+07	7.43574e+07	8.55246e+07	8.08892e+07	7.931e+07	7.63092e+07	7.28708e+07	6.04595e+07	1.03611e+08	9.13937e+07
V271	HESI(+)	572.37	2.32	2.17	M+Na	LPC(20:1)-2	LPC 20:1	3866351509	4000927726	7160600959	9010593504	8599599556	1621999238	15218156492	6137571193	8803858414	9637338905	20239250575	8088760447	4439362405	3808589719	5901886309	4379931776	5139096646	6307025088	6.8548e+08	1454910240	1174611185	7.20898e+08	1164194610	1189192109	4103242551	5119263047	3265609303	2066975739	3034092894	1190799936	4747119738	6409281210	6318684150	3777667640	7688311094	4232213076
V272	HESI(+)	572.373	1.8	1.62	M+H	LPC(22:4)	LPC 22:4	165938408	1.3533e+08	2.91648e+08	342590347	1.30699e+08	9.94047e+07	3.49705e+08	5.75602e+08	4.38142e+08	3.06177e+08	2.21013e+08	2.99222e+08	1.80041e+08	3.28421e+08	2.92223e+08	2.1802e+08	2.34627e+08	1.67228e+08	1.89287e+08	196816456	1.52974e+08	1.60905e+08	1.24324e+08	1.69327e+08	3.74549e+08	3.53434e+08	3.79521e+08	3.04433e+08	3.61819e+08	4.65888e+08	2.2138e+08	2.74837e+08	1.91655e+08	1.89883e+08	2.16477e+08	1.00035e+08
V273	HESI(+)	573.413	4.65	4.22	M+Na	TG(14:2_8:0_8:0)	TG 30:2	3.21824e+07	9.0404e+07	5.17333e+07	3.45998e+07	6.12843e+07	1.6852e+08	7.42716e+07	1.03815e+08	7.6401e+07	5.55348e+07	2.75533e+07	242621005	1.46628e+07	1.04387e+06	6.27474e+06	2.39729e+07	857977	5.18787e+06	9.06861e+07	1.7869e+08	1.3416e+08	6.75575e+07	1.88574e+08	9.24898e+07	17448808	275494923	3.28176e+08	2.36073e+08	5.39077e+08	6.14436e+07	0	1.1489e+06	0	6.58407e+06	1.24376e+06	273048
V274	HESI(+)	573.414	5.03	4.45	M+H	TG(2:0_8:0_22:5)	TG 32:5	1.11761e+06	2.7188e+06	1.84566e+06	850301	2.04419e+06	6.62934e+06	4.39756e+06	3.26637e+06	2.97208e+06	1.82293e+06	1.08141e+06	9.79389e+06	729776	1294.28	75201.8	1.11119e+06	121134	177602	4.11688e+06	6.91184e+06	2.80478e+06	2.58006e+06	7.00582e+06	4.35755e+06	1.34086e+06	1.01442e+07	9.984e+06	1.19732e+07	1.8841e+07	2.50774e+06	45789.1	6054	0	391161	973.151	27572.6
V275	HESI(+)	573.45	5.89	4.87	M+Na	DG(15:2_16:0)	DG 31:2	7.10562e+07	7.92991e+07	9.52313e+07	9.26156e+07	5.60781e+07	1.01387e+08	1.05614e+08	5.75546e+07	5.05636e+07	3.72306e+07	2.94966e+07	4.8002e+07	7.75933e+06	2.53304e+06	2.12901e+06	3.79696e+06	0	1.82053e+06	3.38876e+07	142445694	4.44289e+07	1.08771e+08	1.46907e+08	4.47332e+07	2.17294e+07	1.85209e+08	8.10896e+07	1.49878e+08	2.43932e+08	1.98284e+08	1.43669e+06	192350	925561	1.35352e+07	1.50617e+06	0
V276	HESI(+)	573.45	5.63	4.75	M+Na	TG(P-13:1_16:0_2:0)	TG O-31:2	2.27634e+07	4.28802e+07	6.74512e+07	2.59874e+07	2.77284e+07	5.15643e+07	1.79844e+08	2.28836e+08	1.23544e+07	3.2914e+07	1.34939e+07	1.17396e+08	7.78137e+06	86633.9	2.08108e+06	8.25186e+06	0	1.32692e+06	7.95042e+07	5.0414e+07	5.49944e+07	1.34118e+08	6.05756e+07	5.05046e+07	8.80344e+06	72655735	7.48733e+07	2.54906e+07	1.19961e+08	6.43611e+07	21551.4	9610.99	931782	4.75721e+06	0	0
V277	HESI(+)	573.452	4.4	4.05	M+Na	TG(P-12:1_8:0_11:0)	TG O-31:2	4.43046e+07	1.11226e+08	8.09714e+07	7.44708e+07	7.05131e+07	116220563	209504096	1.90071e+08	6.13792e+07	5.83393e+07	2.72384e+07	2.91879e+08	2.62879e+07	2.2825e+06	3.73973e+06	2.62178e+07	0	3.91624e+06	1.03891e+08	1.2897e+08	1.36134e+08	1.304e+08	2.88434e+08	6.68641e+07	1.72769e+07	3.06242e+08	4.622e+08	2.28208e+08	5.28001e+08	6.05676e+07	1.26936e+06	485418	981599	2.083e+07	2.05194e+06	0
V278	HESI(+)	573.453	4.56	4.16	M+H	DG(22:5_11:0)	DG 33:5	7.48951e+06	5.21763e+07	1.36577e+07	1.94484e+07	1.72042e+07	2.21752e+07	6.12961e+07	7.2415e+07	1.03304e+07	8.39309e+06	6.48347e+06	1.52427e+07	851460	264033	313667	3.73582e+06	0	228872	7.41482e+06	6.43226e+07	2.17708e+07	8.72387e+06	2.8794e+07	9.6857e+06	4.47422e+06	7.37766e+07	4.45122e+07	4.29478e+07	3.83173e+07	8.36617e+06	195411	202467	1.73736e+06	2.06221e+07	242787	0
V279	HESI(+)	573.488	5.49	4.69	M+Na	DG(P-13:1_19:0)	DG O-32:2	5.01803e+06	1.01323e+07	3.0282e+07	1.10666e+08	3.16021e+07	9.26005e+06	1.84333e+06	678285	3.46523e+07	7.44884e+06	5.95975e+07	1.84261e+07	2.09331e+07	4.7207e+06	1.22576e+07	1.11986e+07	2.09901e+07	2.50871e+07	9.56183e+06	147558	7.97421e+06	5.8477e+06	1.9411e+07	5.53381e+06	5.29418e+06	0	2.70382e+06	6.50469e+06	3.91879e+06	6.06733e+07	184212	309286	8.44468e+06	9.13788e+06	2.51909e+07	9.43183e+06
V280	HESI(+)	574.385	2.83	2.7	M+Na	LPC(20:0)	LPC 20:0	1.17401e+08	1.10591e+08	7.62087e+07	7.99675e+07	1093205150	6.52441e+07	4.50627e+07	9.22196e+07	1.48393e+08	1.57033e+08	8.25174e+07	2.44901e+07	1.7084e+07	1.58089e+07	1.40223e+07	1.20833e+07	1.54333e+07	1.36273e+07	1.10777e+07	8.90082e+06	1.30472e+07	7.87253e+06	1.00841e+08	6.84511e+07	4.04175e+07	4.79019e+07	8.16982e+06	7.53741e+06	1.03082e+07	1.246e+07	5.11481e+06	1.02204e+07	1.40384e+07	1.29342e+07	7.83238e+06	5.77334e+06
V281	HESI(+)	574.385	2.89	2.76	M+H	LPC(22:3)-2	LPC 22:3	1438377250	1111069211	517632879	5.73835e+08	1828451858	8.1638e+08	4.48611e+08	1.33176e+08	2.01787e+08	2.36053e+08	6.73641e+08	1.44649e+08	9.1171e+07	9.41281e+07	1.1093e+08	7.99197e+07	1.12467e+08	1.17459e+08	6.49604e+07	5.23209e+07	6.51873e+07	5.10078e+07	3.44459e+07	2.63881e+07	4.46524e+08	7.26942e+07	5.0965e+07	4.6222e+07	5.42133e+07	8.5098e+07	7.07576e+07	1.13263e+08	8.01085e+07	5.70285e+07	9.30149e+07	5.96118e+07
V282	HESI(+)	574.388	2.08	1.92	M+H	LPC(22:3)	LPC 22:3	1.66051e+07	1.7445e+07	6.27452e+07	6.2398e+07	4.11201e+07	9.80605e+06	5.9917e+07	3.33077e+07	5.45636e+07	4.93496e+07	1.00578e+08	5.65105e+07	2.96815e+07	2.69088e+07	5.17449e+07	3.3942e+07	2.38246e+07	5.41141e+07	1.49371e+07	1.32235e+07	9.72238e+06	1.02123e+07	1.22483e+07	1.5148e+07	3.01044e+07	3.27589e+07	3.25697e+07	4.28384e+07	3.49179e+07	2.5186e+07	3.76991e+07	6.07881e+07	2.643e+07	3.00419e+07	5.06828e+07	4.43818e+07
V283	HESI(+)	574.555	9.39	7.4	M+NH4	WE(O-18:0_20:4)	WE O-38:4	8.96713e+07	1.00881e+08	1.19333e+08	1.39012e+08	1.14002e+08	6.08236e+07	8.85967e+07	1.26851e+08	1.28421e+08	1.41936e+08	5.93447e+07	8.46953e+07	4.51872e+07	193865164	8.82029e+07	3.43863e+07	2.74941e+07	5.1975e+07	122674902	9.22786e+07	1.11417e+08	9.23537e+07	1.13186e+08	1.05722e+08	2.42653e+08	1.12666e+08	2.65588e+07	90901511	8.40378e+07	1.29316e+08	6.34654e+07	5.03566e+07	3.28197e+07	4.52651e+07	6.48678e+07	6.2473e+07
V284	HESI(+)	574.555	9.31	7.3	M+H-H2O	Cer(d18:1_20:1)	Cer 38:2	6.32484e+06	6.99815e+06	1.36687e+07	2.12209e+07	1.1407e+07	5.99233e+06	4.82348e+07	2.81911e+07	3.02423e+07	3.87085e+07	6.39747e+07	4.90719e+07	1.40617e+08	4.79801e+07	1.5618e+08	1.19327e+08	1.17042e+08	1.77618e+08	7.22276e+06	1.13091e+07	1.11489e+07	8.11263e+06	5.36713e+06	9.56882e+06	3.61054e+07	1.42262e+08	1.11769e+08	5.6316e+07	4.82892e+07	2.56281e+07	2.06316e+08	1.7678e+08	1.95098e+08	184635529	3.23676e+08	3.24943e+08
V285	HESI(+)	575.413	1.92	1.75	M+H	SM(d16:2_9:0)	SM 25:2	598993	32690.5	21866.1	2.57975e+06	0	2.86059e+06	0	60259.8	1.05109e+06	0	246923	0	2.09562e+06	1.71314e+06	104347	352604	78604.6	861712	155486	598229	1.08457e+06	980936	2.53832e+06	169267	3.35745e+07	2.18676e+06	2.03111e+06	2.40813e+07	3.72915e+06	1.38135e+07	2.3261e+06	1.40737e+06	3.79856e+06	3.01335e+06	343210	331584
V286	HESI(+)	575.428	3.3	3.15	M+Na	TG(22:1_4:0_4:0)	TG 30:1	2.85806e+06	1.40252e+07	1.28241e+07	1.13078e+07	6.49206e+06	1.02688e+07	2.3939e+07	2.23807e+07	2.96631e+06	4.7214e+06	2.39702e+06	3.59922e+07	1.65551e+06	472078	277637	1.82107e+06	96530.1	20509.7	1.23018e+07	2.26955e+07	1.9046e+07	8.67576e+06	4.0961e+07	6.97433e+06	743270	5.29041e+07	8.08662e+07	3.58649e+07	1.11997e+08	9.23586e+06	67304.1	235656	99864.1	2.46901e+06	26436.3	294358
V287	HESI(+)	575.502	6.48	5.12	M+Na	DG(O-13:1_19:0)	DG O-32:1	3.09959e+07	1.26311e+07	1.27324e+06	3.92537e+06	1.99759e+06	2.18813e+06	1.01192e+07	8.08145e+06	7.56295e+06	5.67088e+06	661418	53364	844277	1.14842e+07	8.52598e+06	5.25025e+06	2.17656e+06	339234	948530	9.35448e+06	1.47254e+07	9.76733e+06	2.78404e+06	541084	1.37448e+07	8.37519e+06	1.41218e+07	499139	269112	279243	5.53556e+06	8.93407e+06	1.46018e+07	8.08732e+06	3.03422e+06	739993
V288	HESI(+)	576.403	2.43	2.29	M+H	LPC(22:2)	LPC 22:2	4.72476e+07	5.12367e+07	4.06851e+07	3.96281e+07	5.02627e+07	4.63735e+07	3.93923e+07	2.97721e+07	3.33452e+07	3.78045e+07	6.74695e+07	3.45391e+07	3.07688e+07	2.58901e+07	4.7322e+07	3.41365e+07	1.91175e+07	2.79721e+07	2.70411e+07	2.23504e+07	2.46738e+07	2.5023e+07	3.02619e+07	1.54373e+07	2.11455e+07	2.50951e+07	2.10684e+07	2.27226e+07	1.46899e+07	3.43624e+07	2.93312e+07	2.94059e+07	2.22063e+07	1.95489e+07	2.43098e+07	1.39537e+07
V289	HESI(+)	576.572	10.03	8.41	M+H-H2O	Cer(d18:1_20:0)	Cer 38:1	3.18424e+08	3.03037e+08	1.14275e+08	1.36051e+08	1.77693e+08	1.92021e+08	9.44374e+07	1.22574e+08	1.49586e+08	8.48942e+07	7.40965e+07	1.29133e+08	1.089e+08	2.134e+08	1.53758e+08	1.22988e+08	1.58946e+08	1.7265e+08	1.17793e+08	1.00277e+08	1.15266e+08	9.54056e+07	1.17033e+08	1.44107e+08	3.48473e+08	1.23723e+08	8.31459e+07	1.13049e+08	8.20416e+07	1.29658e+08	176247270	1.71716e+08	1.58787e+08	1.596e+08	259516162	2.81821e+08
V290	HESI(+)	577.394	2.45	2.31	M+H	SM(t18:2_6:0)	phSM 24:2	3.15991e+06	4.64833e+06	1.01297e+07	4.43725e+06	4.49817e+06	1.48829e+06	1.2671e+07	3.09792e+06	2.23415e+06	192339	4.95539e+06	1.75088e+07	118878	1.06972e+06	396974	108074	599158	172502	537125	2.80916e+06	1.08393e+07	3.02451e+06	1.58599e+07	26734.4	529340	1.58101e+07	2.18253e+07	1.147e+07	4.0619e+07	1.78266e+06	513152	910313	109412	82275.3	429261	244603
V291	HESI(+)	578.418	3.01	2.87	M+H	LPC(22:1)	LPC 22:1	1.27754e+08	1.1194e+08	122208963	1.36506e+08	2.32399e+08	1.007e+08	1.33772e+08	4.672e+07	8.59474e+07	7.88747e+07	2.59309e+08	8.16401e+07	6.60407e+07	5.78505e+07	8.09248e+07	4.97774e+07	6.30325e+07	7.07307e+07	3.05174e+07	3.45447e+07	2.59126e+07	2.36336e+07	4.51271e+07	3.36105e+07	6.63522e+07	4.61839e+07	4.41096e+07	4.398e+07	4.77749e+07	4.65839e+07	6.51829e+07	7.13453e+07	5.23089e+07	4.94221e+07	6.64436e+07	4.97107e+07
V292	HESI(+)	579.27	1.3	1.09	M+Na	LPG(22:6)	LPG 22:6	3.47138e+06	844224	9.73047e+06	6.81174e+06	5.30609e+06	4.38946e+06	8.21959e+06	2.32091e+07	9.21797e+06	1.34606e+07	1.02836e+07	1.1617e+07	7.11055e+07	5.8721e+07	7.43222e+07	3.49587e+07	3.34012e+07	2.69081e+07	5.93138e+06	1.61911e+07	8.95988e+06	1.37552e+07	1.15313e+07	6.48621e+06	3.87082e+06	2.09539e+07	3.88167e+07	2.37185e+07	1.89277e+07	2.83101e+07	5.89065e+07	2.80354e+07	1.34108e+08	112594879	8.32435e+07	2.70052e+07
V293	HESI(+)	579.438	6.32	5.05	M+Na	DG(P-15:2_18:3)	DG O-33:6	2.30939e+07	3.77696e+07	5.62144e+07	3.44545e+07	2.77403e+07	3.89734e+07	3.51551e+07	5.40199e+07	1.76546e+07	1.36832e+07	1.06433e+07	4.97232e+07	7.28252e+06	952997	123102	6.46089e+06	0	1.07964e+06	8.96021e+07	1.16899e+08	9.00323e+07	8.52168e+07	108326168	5.38202e+07	2.7066e+06	1.15209e+08	1.69049e+08	106446737	1.36905e+08	6.40771e+07	897808	199507	1.56101e+06	1.21183e+07	331607	0
V294	HESI(+)	579.438	6.43	5.1	M+H	PEt(O-10:0_16:0)	PEt O-26:0	959287	1.46406e+06	6.1958e+06	2.46159e+06	2.18034e+06	4.56338e+06	1.09197e+06	2.2558e+06	618170	201716	133665	4.77708e+06	451639	0	0	577605	0	81440.8	9.74365e+06	7.72372e+06	5.92261e+06	5.91196e+06	9.05864e+06	3.97231e+06	109927	2.87791e+06	8.89801e+06	1.05298e+07	1.56831e+07	7.48487e+06	0	0	0	424169	8635.86	0
V295	HESI(+)	579.534	10.45	9.1	M+H	DG(O-13:0_21:2)	DG O-34:2	4.17033e+07	3.8266e+07	2.58408e+07	3.39861e+07	3.81648e+07	3.5177e+07	4.2096e+07	4.95048e+07	4.09231e+07	4.06664e+07	3.40445e+07	4.20809e+07	1.78319e+07	1.98521e+07	2.21054e+07	3.28369e+07	2.57318e+07	2.47527e+07	6.73746e+07	8.25178e+07	5.88135e+07	4.68925e+07	7.46496e+07	5.43113e+07	6.33961e+07	7.8954e+07	5.4957e+07	5.80432e+07	5.68637e+07	3.65662e+07	5.2201e+07	3.45275e+07	1.19685e+07	8.76316e+07	1.68685e+07	2.35664e+07
V296	HESI(+)	580.434	3.7	3.51	M+H	LPC(22:0)	LPC 22:0	4.52286e+06	4.21474e+06	4.34856e+06	4.37777e+06	3.45249e+06	4.36118e+06	4.33122e+06	4.24722e+06	3.32769e+06	3.71708e+06	3.29638e+06	2.76611e+06	3.36589e+06	3.76877e+06	3.61662e+06	3.05061e+06	2.40887e+06	2.62704e+06	1.53563e+06	2.29332e+06	2.23693e+06	2.72855e+06	2.59003e+06	2.01025e+06	3.49991e+06	3.38816e+06	3.00325e+06	2.67848e+06	3.05881e+06	4.45334e+06	2.01752e+06	2.6467e+06	3.07961e+06	3.23774e+06	2.5209e+06	2.22052e+06
V297	HESI(+)	580.435	3.95	3.71	M+H	LPC(22:0)	LPC 22:0	1.40429e+08	1.17263e+08	5.80282e+07	5.79701e+07	1.01448e+08	1.39912e+08	4.78173e+07	4.4567e+07	4.08121e+07	4.656e+07	5.49907e+07	3.85673e+07	4.06184e+07	4.20383e+07	4.38432e+07	3.92418e+07	3.21017e+07	3.98478e+07	2.87462e+07	3.09901e+07	3.5618e+07	3.91737e+07	3.65401e+07	2.47258e+07	4.64031e+07	4.31767e+07	3.38721e+07	3.04178e+07	4.44573e+07	5.67619e+07	3.36878e+07	4.35799e+07	3.81874e+07	4.07459e+07	4.06423e+07	3.01228e+07
V298	HESI(+)	580.458	3.93	3.7	M+NH4	TG(18:3_5:0_8:0)	TG 31:3	9.13587e+06	2.27266e+07	2.11944e+07	1.74977e+07	1.32252e+07	2.88795e+07	2.71291e+07	2.94382e+07	1.89539e+07	1.3477e+07	5.06241e+06	5.21694e+07	2.80763e+06	771806	1.43283e+06	3.41729e+06	284912	884199	4.02347e+07	8.53351e+07	4.7624e+07	4.63359e+07	8.08173e+07	2.7374e+07	5.8814e+06	9.8055e+07	1.0937e+08	7.54957e+07	1.37427e+08	4.8802e+07	396966	573231	530490	5.14233e+06	461460	253017
V299	HESI(+)	581.454	7.99	5.95	M+H	DG(O-15:2-20:6)	DG O-35:8	0	1.2337e+07	1.09501e+07	5.06314e+06	1.28798e+07	2.6787e+07	1.19921e+07	1.7974e+07	2.78823e+06	1.86419e+06	0	2.55975e+07	0	0	0	0	0	0	2.68243e+07	8.7125e+07	1.50222e+07	8.94736e+06	8.26501e+07	3.30916e+07	5.13806e+06	2.59044e+07	6.6945e+07	4.96659e+07	1.46407e+08	1.10563e+07	0	0	0	0	0	0
V300	HESI(+)	581.551	10.48	9.15	M+H	DG(O-13:0_21:1)	DG O-34:1	3.05661e+07	3.32443e+07	4.69765e+07	6.34239e+07	4.49682e+07	2.10198e+07	8.17334e+07	1.36452e+08	1.16021e+08	9.6079e+07	9.44474e+07	9.02526e+07	2.86775e+06	5.91908e+06	4.84989e+06	6.87564e+06	45442.7	3.15536e+06	2.62268e+07	4.5784e+07	2.8003e+07	2.26432e+07	3.97403e+07	3.3019e+07	5.52967e+07	9.2011e+07	5.13673e+07	2.60382e+07	4.06026e+07	4.44273e+07	2.39078e+06	5.55148e+06	7346.2	5.28661e+06	664385	31615.7
V301	HESI(+)	582.51	8.36	6.25	M+NH4	DG(14:0_18:2)	DG 32:2	8.47368e+06	1.07827e+07	5.60062e+06	2.07422e+07	1.98817e+07	5.17793e+06	1.37612e+07	1.53931e+06	7.47116e+06	1.08207e+07	6.68453e+06	3.79174e+06	1.99012e+06	4.07299e+06	4.70529e+06	1.1507e+07	2.94228e+07	4.16491e+06	1.83734e+07	2.27196e+07	4.40413e+07	2.22639e+07	2.23593e+07	2.12348e+07	1.75589e+07	2.2784e+07	1.42231e+07	0	1.22987e+07	2.27105e+06	4.17845e+07	1.97382e+07	1.834e+07	6.42994e+07	1.21083e+07	2.68124e+06
V302	HESI(+)	584.525	9.3	7.28	M+Na	DG(16:0_16:1)	DG 32:1	924621	608961	732596	0	801337	685934	0	181115	0	0	1.3454e+06	0	893355	0	1.58041e+06	3.30572e+06	6.40981e+06	3.93296e+06	1.33324e+06	217035	688298	825752	159163	0	0	0	0	0	0	0	5.40923e+06	2.95575e+06	2.12756e+06	8.31702e+06	2.98505e+06	1.02474e+06
V303	HESI(+)	584.525	9.04	6.96	M+NH4	DG(16:0_16:1)	DG 32:1	5.46966e+07	7.02277e+07	1.16995e+08	1.54046e+08	9.90243e+07	6.67355e+07	6.66817e+07	9.81612e+06	6.81656e+07	7.18709e+07	9.55266e+07	6.84737e+07	1.05472e+08	3.57958e+07	1.46003e+08	2.12435e+08	5.181e+08	2.07692e+08	1.82732e+08	1.16897e+08	1.70065e+08	1.16371e+08	1.27224e+08	6.9268e+07	138811907	1.11322e+08	6.45427e+07	6.32559e+07	1.18205e+08	8.31261e+07	5.96025e+08	3.99607e+08	3.06068e+08	8.92667e+08	2.737e+08	2.35568e+08
V304	HESI(+)	586.328	1.93	1.75	M+Na	LPC(P-23:7)	LPC O-23:8	4.24653e+07	4.70842e+07	6.15807e+07	8.54229e+07	8.97435e+07	2.75774e+07	8.83383e+07	9.32748e+07	8.34491e+07	1.01325e+08	1.60199e+08	5.95626e+07	4.52921e+07	5.5655e+07	3.0808e+07	3.27742e+07	3.15258e+07	3.04573e+07	2.29715e+07	1.37859e+07	2.1876e+07	1.87062e+07	3.34563e+07	3.48937e+07	3.68634e+07	3.71453e+07	3.21991e+07	3.4909e+07	3.25691e+07	2.45226e+07	2.77162e+07	3.73735e+07	3.94883e+07	3.93832e+07	3.07763e+07	1.82361e+07
V305	HESI(+)	586.541	9.7	7.87	M+NH4	TG(O-13:0_16:0_3:0)	TG O-32:0	3.53295e+07	3.33988e+07	4.29043e+07	5.68153e+07	5.19585e+07	2.08707e+07	2.95377e+07	1.8413e+07	3.21725e+07	3.18608e+07	3.72246e+07	2.65785e+07	5.9367e+07	2.94594e+07	6.97956e+07	1.04626e+08	1.50825e+08	108680861	5.74982e+07	4.5053e+07	3.94816e+07	2.96762e+07	5.42145e+07	3.50137e+07	7.28761e+07	4.45349e+07	2.66074e+07	4.23807e+07	3.03568e+07	4.08923e+07	2.96081e+08	1.82771e+08	1.02746e+08	3.16742e+08	1.14157e+08	1.24849e+08
V306	HESI(+)	587.43	5.5	4.69	M+Na	TG(19:2_5:0_7:0)	TG 31:2	6.27103e+07	7.94846e+07	8.33148e+07	6.7649e+07	4.18446e+07	1.64235e+08	9.58973e+07	156380022	6.38613e+07	3.34931e+07	1.86659e+07	1.03267e+08	1.16479e+07	3.66057e+06	3.34012e+06	1.73821e+07	681616	2.72209e+06	1.23459e+08	2.05466e+08	1.38389e+08	1.32095e+08	1.73177e+08	7.42675e+07	2.95654e+07	2.25416e+08	2.79943e+08	1.96372e+08	3.54817e+08	212962800	3.51831e+06	1.16036e+06	4.38523e+06	1.93237e+07	1.38992e+06	6172.7
V307	HESI(+)	587.43	5.88	4.86	M+Na	TG(5:0_13:1_13:1)	TG 31:2	1.93465e+08	1.31162e+08	3.55021e+08	1.11096e+08	5.3573e+07	2.83906e+08	4.75923e+07	1.36324e+08	9.35376e+07	3.33986e+07	2.45426e+07	7.83053e+07	2.22282e+07	4.74937e+06	1.02999e+07	3.36367e+07	146357	8.148e+06	1.74075e+08	2.67857e+08	2.3659e+08	3.28686e+08	2.91498e+08	1.06886e+08	2.89142e+07	2.91346e+08	4.22371e+08	3.73403e+08	2.94873e+08	9.13121e+08	8.37893e+06	4.71295e+06	1.59222e+07	8.91481e+07	6.04223e+06	443243
V308	HESI(+)	587.43	6.26	5.03	M+H	TG(23:5_2:0_8:0)	TG 33:5	4.39193e+07	5.87707e+07	8.01472e+07	3.48117e+07	2.83659e+07	1.04587e+08	6.87271e+07	9.58297e+07	3.85517e+07	2.79123e+07	1.21914e+07	1.10112e+08	5.96339e+06	228295	1.09145e+06	9.2534e+06	797525	1.28435e+06	1.13575e+08	1.47049e+08	8.71282e+07	9.60059e+07	1.91164e+08	6.09181e+07	1.78669e+07	2.00151e+08	215225054	1.86415e+08	2.55232e+08	1.49329e+08	1.72058e+06	2.5196e+06	2.31288e+06	1.9784e+07	1.90699e+06	273724
V309	HESI(+)	587.43	4.49	4.11	M+Na	TG(14:2_5:0_12:0)	TG 31:2	6.18103e+07	1.42074e+08	1.03825e+08	9.30387e+07	7.39411e+07	1.17269e+08	2.18399e+08	2.91092e+08	7.978e+07	6.786e+07	4.38171e+07	1.81484e+08	2.08623e+07	2.67708e+06	9.86119e+06	2.80117e+07	0	4.25351e+06	1.36999e+08	2.41924e+08	2.25356e+08	207942509	3.53167e+08	8.40857e+07	3.2376e+07	2.76224e+08	4.47716e+08	277477109	5.6513e+08	1.57687e+08	2.82737e+06	1.25999e+06	1.94002e+06	5.07785e+07	6.03665e+06	561792
V310	HESI(+)	587.43	6.02	4.92	M+H	TG(24:5_4:0_5:0)	TG 33:5	2.98482e+07	7.46205e+07	6.39689e+07	5.29048e+07	4.14281e+07	1.44925e+08	5.46931e+07	8.98916e+07	5.17663e+07	2.95549e+07	1.72114e+07	9.77317e+07	1.06063e+07	742762	1.96967e+06	1.86653e+07	273918	2.97303e+06	1.12203e+08	1.90477e+08	117537729	134198858	2.10677e+08	7.95444e+07	2.31047e+07	2.07546e+08	2.58959e+08	1.89518e+08	2.82942e+08	2.70935e+08	3.49329e+06	2.20245e+06	2.66691e+06	1.47806e+07	3.54976e+06	388751
V311	HESI(+)	587.43	4.75	4.28	M+Na	TG(17:2_6:0_8:0)	TG 31:2	3.50773e+07	7.28083e+07	7.64871e+07	5.25327e+07	3.80858e+07	7.84895e+07	2.32298e+07	1.25433e+08	1.90962e+07	2.67763e+07	5.57422e+06	7.62034e+07	2.2619e+06	0	32869.2	9.81136e+06	0	6168.6	7.35046e+07	1.81035e+08	1.36479e+08	8.78928e+07	2.16757e+08	5.43262e+07	5.77113e+06	1.67744e+08	241856458	1.64646e+08	3.44936e+08	2.03217e+08	25094.4	0	0	9.84332e+06	0	0
V312	HESI(+)	587.43	5.58	4.73	M+H	TG(25:5_4:0_4:0)	TG 33:5	8.72509e+06	1.01305e+07	9.10477e+06	7.5964e+06	5.30896e+06	1.96578e+07	2.12015e+07	1.92841e+07	1.13743e+07	3.87297e+06	1.83953e+06	1.15695e+07	993621	228627	11775.9	1.68147e+06	0	16042.1	16757856	3.1126e+07	2.02477e+07	1.66269e+07	2.12729e+07	1.16098e+07	4.17678e+06	2.33321e+07	3.18223e+07	1.99307e+07	3.69528e+07	5.2803e+07	195213	0	198584	1.11572e+06	0	0
V313	HESI(+)	588.343	2.32	2.17	M+Na	LPC(P-23:6)	LPC O-23:7	4.13777e+07	3.85395e+07	8.84325e+07	9.18911e+07	9.94166e+07	1.42996e+07	1.60893e+08	6.49106e+07	9.30093e+07	9.82955e+07	2.56608e+08	8.29982e+07	5.03157e+07	3.98215e+07	6.94159e+07	4.57211e+07	5.74094e+07	6.92851e+07	700409	1.06341e+07	9.5908e+06	6.11392e+06	7.66457e+06	5.66776e+06	4.44623e+07	4.84118e+07	2.20535e+07	1.14034e+07	2.33442e+07	6.96918e+06	4.94929e+07	6.67311e+07	7.65878e+07	3.63985e+07	8.35167e+07	4.69041e+07
V314	HESI(+)	588.362	2.39	2.24	M+H	PC(12:1_10:2)	PC 22:3	1.42786e+06	1.43345e+06	1.32109e+06	793244	1.25175e+06	946321	9.66551e+06	8.04634e+06	2.77258e+06	4.58782e+06	2.88817e+07	5.8036e+06	1.1811e+07	9.34704e+06	1.04738e+07	8.55814e+06	1.11554e+07	1.14262e+07	4.19164e+06	2.68428e+06	1.05004e+06	360199	1.07051e+07	1.11183e+06	2.41859e+06	1.12965e+07	5.05007e+06	3.81809e+06	9.30438e+06	1.8964e+06	7.20044e+06	7.36756e+06	4.08017e+06	2.60949e+06	5.46858e+06	1.15329e+07
V315	HESI(+)	588.364	2.32	2.17	M+Na	PC(18:0_2:0)	PC 20:0	4.05359e+06	1.10235e+07	1.05008e+07	1.4419e+07	7.62544e+06	5.77121e+06	8.48922e+07	5.79226e+07	1.7592e+07	2.25937e+07	1.95601e+07	6.08814e+07	6.47864e+07	6.74191e+07	1.13859e+08	9.29752e+07	8.49982e+07	5.76036e+07	3.83674e+06	1.5468e+07	8.781e+06	1.06273e+06	1.11142e+07	1.00873e+07	1.86175e+07	8.24802e+07	6.67066e+07	4.0039e+07	7.10794e+07	1.98942e+07	3.7119e+07	5.75745e+07	5.10647e+07	2.76482e+07	5.46394e+07	5.58984e+07
V316	HESI(+)	589.482	9.04	6.95	M+Na	DG(16:0_16:1)	DG 32:1	150136928	2.45866e+08	3.78809e+08	3.75166e+08	3.82313e+08	2.32585e+08	1.09925e+08	2.31552e+07	1.68204e+08	1.82226e+08	2.86318e+08	1.763e+08	4.4084e+08	1.18457e+08	497881810	7.07774e+08	1394719189	6.71408e+08	6.2043e+08	2.57629e+08	4.25409e+08	316698355	3.30797e+08	2.87919e+08	3.80594e+08	1.72529e+08	1.12059e+08	1.54269e+08	2.03747e+08	2.13768e+08	1396717597	7.84315e+08	8.96083e+08	2246493371	9.24412e+08	7.01106e+08
V317	HESI(+)	590.32	1.46	1.26	M+Na	LPC(22:6)	LPC 22:6	2148824308	2351002228	1933857747	1958405784	2172327059	2088265978	1741958525	2264515684	2170254964	2150277429	1885125217	1858126584	1994553936	1858443735	1566317246	1943592508	1600390534	1905702577	2006962990	1938845536	2088361155	2336591903	2371719267	2107195132	2008295143	1683780252	1921078084	2132813926	2078499295	2489227456	1674539271	1719794417	1707074851	1538622976	1856646891	1809202446
V318	HESI(+)	590.323	1.67	1.48	M+Na	LPC(22:6)-2	LPC 22:6	3.20224e+08	3.65024e+08	2.29154e+08	2.64107e+08	1.37114e+08	2.91576e+08	1.55763e+08	2.5665e+08	1.90197e+08	3.12819e+08	2.67474e+08	1.68513e+08	2.45826e+08	2.16226e+08	1.46389e+08	1.71421e+08	6.59028e+07	8.98627e+07	5.01763e+08	3.51215e+08	414546436	1.27037e+08	6.25992e+08	5.92601e+08	2.90714e+08	1.55519e+08	2.36541e+08	1.51674e+08	2.9595e+08	1.10187e+08	3.82623e+07	4.62442e+07	4.70794e+07	1.81969e+08	1.36533e+08	1.24604e+08
V319	HESI(+)	590.549	9.53	7.6	M+H	Cer(d18:0_20:3)	Cer 38:3	539579	2.16114e+06	789173	874003	1.62637e+06	359307	830696	263725	1.92431e+06	1.85384e+06	1.35887e+06	1.56689e+06	340983	675266	857495	3.68758e+06	1.2123e+06	1.00104e+06	1.06589e+07	3.84025e+06	2.35654e+06	2.07822e+06	1.16725e+07	4.23324e+06	2.22434e+06	3.83658e+06	3.33622e+06	3.23696e+06	2.69809e+06	2.37266e+06	1.35703e+06	1.33861e+06	174874	670895	663167	6.34254e+06
V320	HESI(+)	590.549	9.45	7.49	M+H-H2O	Cer(t18:0_20:2)	Cer 38:2+O(OH)	9.76591e+06	1.12361e+07	5.34341e+06	4.68372e+06	7.5457e+06	4.97709e+06	6.29216e+06	6.60684e+06	1.12333e+07	1.21683e+07	8.90616e+06	8.53757e+06	6.5578e+06	1.2977e+07	1.61655e+07	2.62658e+07	1.88921e+07	1.46789e+07	1.07625e+07	1.51516e+07	1.36282e+07	1.223e+07	1.21666e+07	1.49879e+07	8.15282e+06	1.58969e+07	1.77684e+07	1.725e+07	1.22925e+07	9.69874e+06	1.47966e+07	2.45143e+07	1.00326e+07	1.01321e+07	1.68334e+07	6.90264e+07
V321	HESI(+)	590.589	10.46	9.12	M+H-H2O	Cer(d18:1_21:0)	Cer 39:1	323843291	2.64828e+08	5.38449e+07	6.47907e+07	1.24908e+08	1.46973e+08	1.77208e+07	2.36161e+07	3.3544e+07	1.58323e+07	1.83249e+07	2.72006e+07	1.24775e+07	2.10536e+07	1.60558e+07	1.7905e+07	1.09819e+07	1.74805e+07	2.56158e+07	2.80063e+07	3.66765e+07	3.08687e+07	3.15394e+07	3.28687e+07	1.95503e+08	1.52259e+07	1.26952e+07	1.18232e+07	1.17497e+07	1.14114e+07	1.42e+07	7.09303e+06	1.00891e+07	2.84268e+07	1.92908e+07	5.27743e+06
V322	HESI(+)	591.441	11.74	10.8	M+H	DG(P-16:3_20:6)	DG O-36:10	6.19405e+07	5.47081e+07	6.51281e+07	7.52656e+07	6.80663e+07	5.37944e+07	3.94925e+07	6.86627e+07	4.46076e+07	5.04487e+07	4.10217e+07	3.89626e+07	2.01621e+07	3.44e+07	1.61946e+07	1.49144e+07	8.75504e+06	1.43245e+07	7.71927e+07	7.87171e+07	7.15397e+07	8.48877e+07	7.07529e+07	6.49274e+07	4.69115e+07	4.11317e+07	4.38367e+07	4.89791e+07	5.1535e+07	6.28987e+07	1.31667e+07	1.21185e+07	1.48419e+07	1.58212e+07	8.99753e+06	1.78219e+07
V323	HESI(+)	591.442	10.71	9.51	M+H	Co(Q6)	Co 6:0	2.53211e+07	2.63781e+07	2.02151e+07	2.49681e+07	4.16242e+07	2.16671e+07	1.63942e+07	1.33342e+07	1.79056e+07	1.55043e+07	1.28963e+07	1.81009e+07	8.55552e+06	2.80478e+06	2.57808e+06	4.22863e+06	5.90175e+06	6.18128e+06	2.55091e+07	3.31144e+07	3.78682e+07	3.13553e+07	3.95456e+07	2.76979e+07	1.28353e+07	1.48348e+07	2.00095e+07	2.47186e+07	2.30541e+07	2.19268e+07	5.05692e+06	4.32014e+06	1.38838e+06	3.93769e+06	5.56747e+06	2.72931e+06
V324	HESI(+)	591.461	3.48	3.31	M+H	TG(8:0_8:0_17:3)	TG 33:3	4.26308e+06	1.29027e+07	1.58016e+07	1.24758e+07	3.29725e+07	8.7085e+06	2.08007e+07	1.95954e+07	3.85627e+06	4.49314e+06	3.40784e+06	2.64684e+07	6.28917e+06	204474	309486	1.89232e+06	0	1.31245e+06	3.53941e+07	2.13383e+07	1.23225e+07	9.30566e+06	3.07225e+07	7.6855e+06	2.19761e+06	4.16112e+07	5.25323e+07	132585808	5.22844e+07	2.21599e+07	209974	52827.9	72125.7	1.41103e+06	143067	0
V325	HESI(+)	591.496	9.7	7.87	M+Na	TG(O-13:0_16:0_3:0)	TG O-32:0	5.30988e+08	515104479	6.18523e+08	7.28576e+08	7.01643e+08	3.7456e+08	3.3375e+08	2.3558e+08	4.27595e+08	4.82699e+08	5.2914e+08	4.20671e+08	9.08002e+08	4.16494e+08	8.70127e+08	1261056393	1702939487	1354677190	7.54406e+08	5.13163e+08	5.54633e+08	4.92571e+08	6.25769e+08	5.3946e+08	8.53898e+08	4.60635e+08	2.91105e+08	5.58949e+08	3.88163e+08	6.14455e+08	2536430387	1683857214	1199776268	2911778670	1614036231	1521262254
V326	HESI(+)	592.335	1.91	1.73	M+Na	LPC(22:5)-2	LPC 22:5	8.64918e+07	9.72067e+07	5.25261e+07	8.16192e+07	6.27116e+07	4.3414e+07	7.39004e+07	6.09825e+07	6.11266e+07	8.96095e+07	9.05851e+07	4.73436e+07	3.16918e+07	3.58102e+07	2.95703e+07	4.12889e+07	3.45966e+07	3.54707e+07	6.65123e+07	5.65817e+07	6.06587e+07	4.27146e+07	9.34418e+07	5.59272e+07	1.51809e+08	3.61719e+07	4.18359e+07	6.42449e+07	4.69898e+07	4.15798e+07	4.51536e+07	3.99638e+07	3.76482e+07	3.86574e+07	4.08182e+07	5.78397e+07
V327	HESI(+)	592.461	4.14	3.86	M+H	LPC(P-24:0)	LPC O-24:1	2.7981e+06	5.49059e+06	1.3168e+07	2.38143e+07	1.7486e+07	1.06598e+07	1.13842e+06	4.35111e+06	3.77718e+06	1.29686e+06	3.17558e+06	3.01109e+06	4.90436e+06	1.95496e+06	341144	446229	1.15569e+06	4.19199e+06	1.58812e+07	2.84907e+06	3.48838e+06	6.49871e+06	1.94877e+07	1.88044e+07	168567	2.25012e+06	6.66611e+06	1.09326e+07	4.22369e+06	1.64341e+07	318175	2.45201e+06	1.42743e+06	2.75377e+06	4.73801e+06	3.19626e+06
V328	HESI(+)	592.493	6.4	5.09	M+NH4	TG(O-24:4_4:0_5:0)	TG O-33:4	218635	2.64481e+06	608285	1.10472e+07	2.43036e+06	8.78399e+06	1.80699e+07	3.21456e+07	174282	4.7064e+06	0	4.59269e+07	1.28341e+06	0	369291	1.53978e+06	0	0	2.87337e+06	3.17823e+07	2.86388e+07	1.22409e+07	2.22866e+07	1.63656e+06	1.38068e+06	1.83602e+08	1.77207e+08	2.99095e+07	1.03911e+08	5.78015e+06	0	516045	0	596994	14455.8	7821.87
V329	HESI(+)	592.568	10.09	8.5	M+H	Cer(d18:1/20:1)	Cer 38:2	306793	6.44533e+06	6.64896e+06	6.12121e+06	2.21956e+06	2.9811e+06	7.64214e+06	2.68369e+06	8.72988e+06	1.20997e+07	5.45378e+06	7.5119e+06	1.01748e+06	0	2.56682e+06	1.85823e+07	858699	659610	1.22733e+07	1.56689e+07	1.27426e+07	1.53157e+07	9.65443e+06	1.05378e+07	2.1845e+06	2.36106e+07	2.0536e+07	1.98124e+07	1.44739e+07	2.18297e+07	0	0	553981	0	789483	674177
V330	HESI(+)	592.568	9.31	7.3	M+H	Cer(d18:1_20:1)	Cer 38:2	6.92844e+06	7.69926e+06	1.52676e+07	1.65555e+07	8.99063e+06	4.91293e+06	3.55996e+07	2.66131e+07	3.03851e+07	2.90745e+07	5.57478e+07	3.54138e+07	6.65423e+07	3.943e+07	6.71806e+07	116872213	8.96082e+07	1.49061e+08	6.18103e+06	1.16614e+07	1.00957e+07	1.05427e+07	6.36188e+06	9.45054e+06	3.37219e+07	4.96632e+07	1.06382e+08	2.87358e+07	4.12618e+07	1.75922e+07	1.80513e+08	7.14655e+07	1.59979e+08	1.3855e+08	2.68195e+08	2.65234e+08
V331	HESI(+)	593.513	9.27	7.24	M+H	DG(16:0_18:2)	DG 34:2	1.11339e+07	2.2953e+07	7.99396e+07	105499192	2.92119e+07	6.86974e+07	2.77391e+07	6.76002e+06	9.27545e+07	1.00237e+08	1.4344e+08	7.61112e+07	1.24559e+08	8.53439e+07	4.42335e+07	6.80748e+07	2.64003e+08	1.19207e+08	1.40102e+08	4.47761e+07	4.074e+07	2.22998e+07	2.14262e+08	1.91953e+08	1.98174e+08	1.4181e+08	1.02684e+08	8.19151e+07	9.4969e+07	3.44142e+07	8.12169e+07	2.56959e+08	227319334	3.37025e+08	1.44344e+08	1.10516e+08
V332	HESI(+)	594.335	1.43	1.22	M+Na	LPC(22:4)-2	LPC 22:4	5.44132e+06	1.40833e+07	4.80429e+06	3.11734e+06	8.7766e+06	7.06346e+06	8.34132e+06	7.65569e+06	1.04751e+07	1.04489e+07	8.3114e+06	4.20074e+06	5.03974e+06	1.02172e+07	5.69286e+06	5.03871e+06	4.49832e+06	8.53416e+06	7.28581e+06	6.18699e+06	7.32734e+06	6.536e+06	8.12639e+06	5.88687e+06	1.29364e+07	2.95741e+06	5.54491e+06	1.24187e+07	4.2133e+06	1.62965e+07	6.99093e+06	7.0119e+06	8.71647e+06	8.78056e+06	1.37552e+07	1.39235e+07
V333	HESI(+)	594.353	1.86	1.68	M+H	PC(P-12:3_12:3)	PC O-24:7	7.4891e+07	9.20459e+07	7.37757e+07	1.09929e+08	8.04559e+07	4.84952e+07	9.24225e+07	230500007	1.44682e+08	1.15259e+08	1.12744e+08	103020279	8.50797e+07	1.3494e+08	1.07314e+08	1.02628e+08	130909743	6.32719e+07	1.07056e+08	6.84538e+07	9.08079e+07	6.87213e+07	8.45976e+07	1.17833e+08	1.14111e+08	1.17426e+08	1.27038e+08	1.251e+08	8.82206e+07	1.63384e+08	9.68262e+07	1.06073e+08	6.97226e+07	9.47269e+07	4.67969e+07	5.06617e+07
V334	HESI(+)	594.415	3.05	2.92	M+H	PC(20:0_2:0)	PC 22:0	509576	2.16255e+06	1.93117e+06	3.00456e+06	729488	1.73909e+06	1.62629e+07	1.42408e+07	4.92388e+06	6.46384e+06	1.65641e+06	1.33797e+07	1.11336e+07	1.05999e+07	1.94245e+07	1.33132e+07	1.45512e+07	9.30868e+06	1.98269e+06	3.78944e+06	3.5441e+06	2.15087e+06	3.10239e+06	1.59648e+06	1.86342e+06	3.42706e+07	1.86823e+07	1.27752e+07	1.83615e+07	6.37262e+06	1.36983e+07	2.2613e+07	9.17723e+06	7.88562e+06	1.22646e+07	8.93239e+06
V335	HESI(+)	594.581	10.09	8.5	M+H	Cer(d18:1_20:0)	Cer 38:1	3.12958e+07	3.74015e+07	1.64197e+07	1.88239e+07	9.05542e+07	2.68277e+07	8.58038e+06	1.08302e+07	1.49879e+07	1.4108e+07	8.15597e+06	7.68773e+06	5.32385e+07	1.74367e+07	9.50639e+06	9.30575e+06	1.17172e+07	8.13703e+07	4.93717e+07	1.12997e+07	1.29976e+07	7.79409e+06	1.38494e+07	6.88687e+07	3.32817e+07	1.53528e+07	8.33117e+06	6.21716e+06	4.70884e+07	8.2693e+06	1.48727e+07	1.04328e+07	1.40431e+07	2.01229e+07	1.2456e+08	2.25443e+07
V336	HESI(+)	594.583	10.67	9.45	M+H	Cer(d18:0/20:1)	Cer 38:1	1.97341e+07	2.5195e+07	1.01962e+07	1.23194e+07	14706102	2.11014e+07	9.6002e+06	7.26455e+06	1.17694e+07	1.2896e+07	4.77331e+06	1.01953e+07	2.86645e+06	2.70137e+06	5.23504e+06	1.2482e+07	2.23059e+06	2.27564e+06	2.70935e+07	3.35615e+07	3.06324e+07	2.89877e+07	2.60791e+07	2.15106e+07	7.62783e+06	2.97406e+07	2.46788e+07	2.78913e+07	1.97767e+07	2.07102e+07	0	3.5297e+06	2.73638e+06	3.45172e+06	1.22951e+07	868849
V337	HESI(+)	594.584	9.56	7.64	M+H	Cer(d18:0_20:1)	Cer 38:1	92324.5	66279.6	3201.72	898600	85075.3	63852.4	8.48064e+06	5.21402e+06	1.08002e+07	8.77367e+06	8.67319e+06	5.93943e+06	7.90746e+06	1.17499e+07	1.14252e+07	6.77863e+06	7.56551e+06	1.65813e+07	1.45397e+06	1.35094e+06	1.41496e+06	166490	1.11761e+06	379699	2.19718e+06	6.43852e+06	1.31765e+07	8.78719e+06	3.25493e+06	2.84499e+06	2.3666e+07	2.21727e+07	2.00861e+07	1.12326e+07	3.0931e+07	1.08793e+08
V338	HESI(+)	595.434	4.32	4	M+Na	DG(17:2_16:3)	DG 33:5	2.6224e+06	1.55771e+07	8.2931e+06	7.60023e+06	4.00927e+06	2.47748e+07	3.65791e+07	2.62828e+07	4.51443e+06	4.05931e+06	2.1778e+06	1.45483e+07	481975	0	27464.6	939206	0	320260	5.19627e+06	3.89522e+07	5.9165e+06	5.12797e+06	4.28724e+07	1.93249e+07	4.01364e+06	5.78517e+07	9.45664e+07	6.78511e+07	3.13213e+07	4.39488e+07	0	84544.3	63177	1.18021e+06	24769.9	0
V339	HESI(+)	595.434	5.86	4.85	M+Na	DG(17:3_16:2)	DG 33:5	1.10744e+07	2.11029e+07	2.69541e+07	2.21408e+07	2.78215e+07	4.98669e+07	2.19286e+07	2.72502e+07	1.82981e+07	1.8184e+07	6.64585e+06	4.83295e+07	826031	0	0	1.37093e+06	0	103542	62721850	7.62866e+07	5.50256e+07	8.61299e+07	8.06249e+07	3.99677e+07	6.37789e+06	18208024	5.87392e+07	5.9522e+07	116163912	1.84354e+07	160745	0	417219	8.90794e+06	163641	0
V340	HESI(+)	595.434	4	3.76	M+H	TG(O-5:0_4:0_26:8)	TG O-35:8	2.56033e+06	8.16849e+06	7.45877e+06	7.6295e+06	4.55417e+06	6.25625e+06	1.08478e+07	1.3087e+07	2.52852e+06	2.38115e+06	1.63171e+06	1.67156e+07	405194	0	0	307926	10838.6	3032.63	2.32997e+06	1.03352e+07	9.28755e+06	5.50654e+06	1.51245e+07	3.23442e+06	514722	3.15168e+07	3.86888e+07	2.24377e+07	5.39055e+07	1.75728e+07	36558.6	0	0	293403	0	0
V341	HESI(+)	595.434	4.85	4.35	M+H	DG(20:6-15:2)	DG 35:8	3.10813e+06	3.99244e+06	4.20617e+06	4.42706e+06	3.14251e+06	5.32226e+06	8.87308e+06	7.66592e+06	1.8881e+06	2.66718e+06	3.34468e+06	1.01248e+07	2.15164e+06	257245	326354	1.45122e+06	12440.8	213190	6.65533e+06	6.14466e+07	1.0519e+07	8.0831e+06	1.18599e+07	4.00667e+06	1.47787e+06	6.55092e+07	1.53951e+07	9.06111e+06	1.86081e+07	3.71029e+06	20644	0	460023	1.15444e+06	54194.6	101918
V342	HESI(+)	595.53	9.83	8.07	M+H	DG(16:0_18:1)	DG 34:1	34796607	4.1997e+07	8.14115e+07	8.80907e+07	5.87421e+07	2.9729e+07	5.84167e+07	2.59292e+07	8.04456e+07	6.44795e+07	1.02176e+08	6.6362e+07	2.04903e+08	8.42492e+07	1.82459e+08	1.8952e+08	2.88121e+08	1.77494e+08	1.08093e+08	1.08635e+08	7.98626e+07	6.16153e+07	7.90652e+07	7.74287e+07	1.64509e+08	1.26529e+08	8.02404e+07	91559992	7.83557e+07	6.37695e+07	5.46629e+08	3.79642e+08	3.02895e+08	4.26784e+08	1.83281e+08	2.39995e+08
V343	HESI(+)	596.368	2.14	1.98	M+H	LPC(24:6)	LPC 24:6	1.01159e+07	1.33018e+07	67374746	6.43534e+07	2.5752e+07	8.23146e+06	3.92934e+07	2.44093e+07	4.79735e+07	5.24627e+07	1.32913e+08	6.68445e+07	4.07837e+07	2.59903e+07	6.09145e+07	3.42851e+07	3.69114e+07	7.15048e+07	1.26361e+07	6.57009e+06	4.61858e+06	4.35493e+06	1.08593e+07	8.26757e+06	1.85904e+07	2.16924e+07	2.02764e+07	4.30028e+07	2.786e+07	2.80492e+07	3.07395e+07	6.59784e+07	2.24266e+07	2.97328e+07	6.9107e+07	7.56191e+07
V344	HESI(+)	597.448	5.59	4.73	M+NH4	DG(17:2_16:2)	DG 33:4	1.12117e+08	3.8386e+08	4.02211e+08	3.9137e+08	2.61051e+08	3.06131e+08	645633973	611060197	1.26061e+08	1.55827e+08	8.59891e+07	7.3197e+08	6.39406e+07	1.43908e+07	1.39768e+07	5.62314e+07	268351	1.65096e+07	2.74766e+08	5.38836e+08	4.94098e+08	3.01081e+08	8.36366e+08	2.31052e+08	79808455	1132097393	1696493178	9.46825e+08	1878910429	5.30199e+08	8.79639e+06	6.96476e+06	6.06238e+06	6.72421e+07	3.70174e+06	0
V345	HESI(+)	597.448	4.46	4.1	M+H	DG(27:7_8:0)	DG 35:7	2.11635e+06	6.30012e+06	6.42727e+06	6.34427e+06	4.01435e+06	6.11203e+06	5.7176e+06	4.7881e+06	1.88036e+06	1.73362e+06	968807	1.21581e+07	536828	3402.6	178516	81545.6	0	0	6.50609e+06	7.52087e+06	7.56294e+06	8.1312e+06	1.4052e+07	4.69876e+06	536721	1.2631e+07	1.98969e+07	1.11375e+07	1.96574e+07	1.06418e+07	8176.99	0	0	181633	0	0
V346	HESI(+)	597.451	4.38	4.04	M+H	TG(O-5:0_5:0_25:7)	TG O-35:7	1.39544e+07	3.74588e+07	4.27327e+07	4.38398e+07	2.23602e+07	3.97563e+07	4.1725e+07	3.93873e+07	1.07677e+07	1.11163e+07	6.99613e+06	6.66992e+07	124312	103586	1.08834e+06	3.77003e+06	0	593236	3.85606e+07	4.63349e+07	5.28351e+07	4.29638e+07	9.58332e+07	2.81298e+07	4.49594e+06	8.03077e+07	1.35361e+08	9.68738e+07	1.85066e+08	5.4655e+07	395244	239875	89582.2	7.36788e+06	82804.7	0
V347	HESI(+)	597.451	5.77	4.81	M+H	TG(O-4:0_6:0_25:7)	TG O-35:7	3.8166e+07	9.42842e+07	4.69509e+07	7.83086e+07	5.76265e+07	3.18841e+07	7.71676e+07	1.02275e+08	1.56805e+07	4.07757e+07	2.53497e+07	1.47057e+08	1.2833e+07	1.31674e+06	3.63486e+06	1.56267e+07	0	1.74768e+06	2.27537e+07	1.47125e+08	5.27328e+07	2.7992e+07	1.85429e+08	2.36498e+07	8.2868e+06	1.64496e+08	2.04455e+08	1.78205e+08	291080197	2.9852e+07	5128.06	18003.7	86759.4	9.67971e+06	1.48021e+06	0
V348	HESI(+)	598.387	2.38	2.24	M+H	LPC(24:5)	LPC 24:5	4.26676e+06	2.57239e+06	4.79608e+06	5.63977e+06	1.03417e+07	3.68374e+06	1.53718e+07	3.2406e+06	3.75956e+06	5.22413e+06	2.04628e+07	3.4615e+06	4.00019e+06	2.7019e+06	2.65659e+06	3.18514e+06	5.15064e+06	2.38666e+06	2.9565e+06	1.10243e+06	494106	365599	2.71185e+06	1.68219e+06	3.23194e+06	1.76369e+06	1.21861e+06	989584	1.2564e+06	1.64401e+06	5.50034e+06	7.89903e+06	3.31762e+06	2.33232e+06	3.49482e+06	1.75959e+06
V349	HESI(+)	600.401	2.83	2.7	M+H	LPC(24:4)-2	LPC 24:4	1.11358e+07	1.35274e+07	1.75859e+07	2.12594e+07	3.14442e+07	7.22952e+06	1.39533e+07	1.01345e+07	1.74909e+07	1.23377e+07	3.33015e+07	1.46877e+07	1.01548e+07	8.38139e+06	1.11067e+07	6.67286e+06	8.27045e+06	1.08242e+07	7.26847e+06	6.41587e+06	3.27432e+06	3.29299e+06	7.7771e+06	9.8989e+06	9.14764e+06	9.21581e+06	6.89392e+06	1.00849e+07	9.94511e+06	7.22895e+06	3.71904e+06	9.32728e+06	4.45999e+06	5.42586e+06	5.95881e+06	6.37304e+06
V350	HESI(+)	600.401	3	2.87	M+H	LPC(24:4)	LPC 24:4	4.47847e+07	3.85143e+07	4.14311e+07	4.97432e+07	9.96593e+07	3.09661e+07	5.62816e+07	1.52515e+07	3.10747e+07	3.17097e+07	1.46111e+08	3.03529e+07	3.02467e+07	2.54366e+07	3.78266e+07	2.06051e+07	3.73452e+07	3.85363e+07	8.21875e+06	8.99345e+06	6.19124e+06	4.87001e+06	1.34283e+07	9.04991e+06	2.34802e+07	1.57031e+07	1.14938e+07	1.37436e+07	1.57869e+07	1.30126e+07	3.44757e+07	4.24616e+07	2.50224e+07	1.97425e+07	3.34269e+07	2.53097e+07
V351	HESI(+)	600.573	9.42	7.44	M+H-H2O	Cer(d18:1_22:2)	Cer 40:3	1.14645e+08	1.30191e+08	1.52958e+08	1.83764e+08	2.01782e+08	7.78618e+07	246996906	1.92739e+08	1.61913e+08	1.98363e+08	2.27089e+08	1.55491e+08	1.45951e+08	2.40453e+08	1.47198e+08	1.33222e+08	1.06073e+08	1.5233e+08	6.82636e+07	5.90397e+07	6.27481e+07	5.39987e+07	8.55226e+07	8.23519e+07	2.46378e+08	1.77271e+08	1.57841e+08	1.53911e+08	8.05236e+07	1.52438e+08	1.39641e+08	1.39435e+08	1.70378e+08	139720159	1.92856e+08	1.29057e+08
V352	HESI(+)	601.435	2.85	2.72	M+H	SM(d18:3_9:0)	SM 27:3	4.86402e+06	3.54061e+06	5.16336e+06	6.11319e+06	5.63817e+06	2.24588e+06	1.30437e+07	1.15695e+07	7.03252e+06	1.27118e+07	3.23455e+07	7.94037e+06	902577	3.58849e+06	1.23604e+06	3.31708e+06	3.30493e+06	4.20966e+06	4.38907e+06	2.83936e+06	8.20409e+06	8.2865e+06	3.80386e+06	2.71105e+06	2.38415e+06	3.9482e+06	5.67607e+06	4.49938e+06	5.39553e+06	2.49118e+06	1.05863e+06	7.60462e+06	2.23693e+06	1.18525e+06	1.46709e+06	7.12949e+06
V353	HESI(+)	602.587	10.62	9.37	M+NH4	WE(O-18:0_22:4)	WE O-40:4	1.40899e+07	1.42703e+07	1.63695e+07	2.11513e+07	1.42262e+07	9.77425e+06	9.74236e+06	7.34088e+06	1.2222e+07	1.04474e+07	8.92483e+06	8.58758e+06	7.911e+06	8.70693e+06	1.31718e+07	7.6891e+06	1.08252e+07	1.15455e+07	9.42938e+06	1.05379e+07	1.07099e+07	1.34232e+07	1.5191e+07	9.58343e+06	1.45762e+07	1.17669e+07	7.69633e+06	1.28369e+07	1.18256e+07	1.14357e+07	9.74857e+06	9.89314e+06	1.23674e+07	1.10381e+07	1.81945e+07	1.02632e+07
V354	HESI(+)	602.587	10.22	8.73	M+H-H2O	Cer(d18:2_22:0)	Cer 40:2	1486391793	1434253853	4.80245e+08	5.38413e+08	1070318278	9.81932e+08	331232098	2.29154e+08	221795710	2.14806e+08	2.67457e+08	188828419	1.0324e+08	2.44326e+08	1.33574e+08	1.45474e+08	9.55621e+07	1.73626e+08	2.84851e+08	1.92992e+08	3.06433e+08	2.35634e+08	3.14119e+08	2.60677e+08	1310600016	1.73775e+08	1.26921e+08	1.89228e+08	1.58135e+08	2.27815e+08	1.86343e+08	1.82741e+08	1.02445e+08	1.4794e+08	2.05534e+08	1.01781e+08
V355	HESI(+)	602.588	10.07	8.48	M+H-H2O	Cer(d18:1_22:1)	Cer 40:2	7.18765e+08	811252540	8.30407e+08	1012062757	1303006400	4.82499e+08	1490740353	5.17995e+08	7.36851e+08	7.78823e+08	1339796187	6.99797e+08	5.88762e+08	6.36905e+08	7.37596e+08	5.69985e+08	5.47523e+08	8.56518e+08	1.83258e+08	2.09757e+08	1.7776e+08	1.62624e+08	1.94056e+08	1.99289e+08	1300794681	6.82026e+08	6.40857e+08	5.21591e+08	441947796	6.59273e+08	6.89236e+08	8.48437e+08	9.14043e+08	6.50512e+08	1342421078	1221141431
V356	HESI(+)	603.495	9.53	7.6	M+NH4	DG(17:0_16:1)	DG 33:1	7.15232e+06	1.013e+07	1.09818e+07	1.35409e+07	1.60706e+07	8.21855e+06	2.62468e+06	2.28709e+06	6.64804e+06	5.23722e+06	8.73888e+06	6.44228e+06	8.18809e+06	2.98528e+06	7.16009e+06	5.04546e+06	1.23232e+07	1.4045e+07	1.44829e+07	1.00967e+07	8.77068e+06	1.08614e+07	1.27545e+07	1.46793e+07	1.55788e+07	7.91979e+06	4.63484e+06	7.34536e+06	7.31951e+06	1.08028e+07	1.53345e+07	9.36236e+06	1.2311e+07	3.01227e+07	1.34541e+07	6.16937e+06
V357	HESI(+)	603.532	10.48	9.16	M+H	DG(P-17:3_19:0)	DG O-36:4	1.76994e+08	2.31886e+08	3.49804e+08	3.53223e+08	2.72821e+08	1.77719e+08	4.43376e+08	6.64073e+08	6.5523e+08	631909770	6.92452e+08	6.73026e+08	1.1036e+08	1.13399e+08	1.41816e+08	1.40715e+08	1.19367e+08	1.15342e+08	2.16425e+08	2.13311e+08	1.717e+08	1.39252e+08	2.36092e+08	2.62107e+08	3.25008e+08	4.21969e+08	2.93803e+08	1.80373e+08	2.57615e+08	5.6495e+07	169433785	1.48234e+08	9.80172e+07	191303216	8.9165e+07	1.33758e+08
V358	HESI(+)	604.362	1.2	1	M+H	PS(P-7:0_17:2)	PS O-24:3	0	6549.25	35267.5	1.69144e+06	137133	413670	614849	1.27523e+06	4.81457e+06	4.83243e+06	1.19906e+06	0	0	0	0	0	0	0	2.13115e+07	1.45847e+07	2.54274e+07	1.99279e+07	1.41998e+07	2.29201e+07	45113	3.97281e+06	5.57437e+06	1.38297e+07	5.74758e+06	4.95059e+06	0	0	0	0	0	943932
V359	HESI(+)	604.602	10.79	9.63	M+H-H2O	Cer(d18:1_22:0)	Cer 40:1	1010590920	1132065310	2.24483e+08	2.44443e+08	5.57969e+08	6.77057e+08	1.02945e+08	1.25181e+08	1.61087e+08	8.91178e+07	9.72926e+07	1.69702e+08	1.20808e+08	1.58892e+08	1.41049e+08	1.41032e+08	1.55434e+08	1.47247e+08	1.46147e+08	1.51437e+08	1.61008e+08	143449962	1.2945e+08	1.82347e+08	7.88184e+08	1.00758e+08	8.40104e+07	1.20803e+08	102986450	2.08775e+08	1.25322e+08	1.08613e+08	1.30791e+08	1.63318e+08	2.01847e+08	1.32946e+08
V360	HESI(+)	606.45	4.01	3.76	M+H	LPC(24:1)	LPC 24:1	5.67247e+07	4.7536e+07	4.9384e+07	5.21849e+07	6.04931e+07	5.27246e+07	5.40879e+07	4.1165e+07	4.14899e+07	4.56068e+07	7.19165e+07	4.35974e+07	3.05301e+07	3.60658e+07	3.98057e+07	2.97565e+07	2.9819e+07	3.43011e+07	1.91819e+07	2.21122e+07	2.07123e+07	2.28942e+07	2.51354e+07	1.52593e+07	2.16623e+07	4.41331e+07	4.35826e+07	3.12863e+07	4.74715e+07	5.40785e+07	2.52918e+07	4.03279e+07	2.67127e+07	2.53951e+07	2.66645e+07	1.86662e+07
V361	HESI(+)	606.51	7.9	5.89	M+H	Cer(d17:1/22:1)	Cer 39:2	862521	6.78631e+06	2.08152e+06	3.80051e+06	3.10472e+07	5.69703e+06	1.13437e+07	3.34805e+06	1.19973e+07	4.24023e+06	1.6445e+07	5.27227e+06	4.61851e+06	9.95392e+06	1.01146e+07	2.56031e+07	2.22428e+07	6.87422e+06	4.31971e+07	3.21705e+07	4.22146e+07	1.68712e+07	6.53642e+07	5.3745e+07	1.31357e+07	1.11442e+07	8.95849e+06	2.79224e+06	1.34356e+07	0	1.20127e+07	1.97545e+07	9.04721e+06	2.66094e+07	8.45772e+06	0
V362	HESI(+)	606.584	9.71	7.88	M+H-H2O	Cer(t17:0_22:1)	Cer 39:1+O(OH)	3.49127e+07	4.58537e+07	6.62574e+07	8.10337e+07	1.16153e+08	2.1146e+07	3.49339e+07	9.364e+06	1.67586e+07	1.18626e+07	2.70837e+07	1.04501e+07	5.27175e+06	6.80093e+06	5.97238e+06	4.74029e+06	5.05865e+06	7.37937e+06	4.2157e+06	8.16373e+06	6.13469e+06	5.00731e+06	3.41348e+06	6.19098e+06	5.41792e+07	1.6481e+07	1.14502e+07	9.26631e+06	1.55432e+07	8.13553e+06	4.11498e+06	3.2187e+06	9.32764e+06	1.08086e+07	1.85549e+07	6.46223e+06
V363	HESI(+)	608.488	6.18	4.99	M+NH4	TG(22:3_5:0_6:0)	TG 33:3	6.36986e+07	1.41612e+08	5.0603e+07	3.63536e+07	2.14924e+07	3.20055e+07	3.3901e+08	2.523e+08	1.59132e+07	1.78726e+07	1.37785e+07	1.58835e+08	7.70772e+06	132025	2.14248e+06	7.76439e+06	244324	744202	3.8904e+07	5.05811e+08	2.18869e+08	2.25734e+08	162535747	2.81928e+07	1.68047e+07	7.8395e+08	9.77823e+08	2.57435e+08	3.15817e+08	1.17948e+08	759158	375491	2.37829e+06	4.3843e+07	3.87226e+06	0
V364	HESI(+)	608.524	8.93	6.82	M+Na	DG(16:1_18:2)	DG 34:3	5.42116e+06	5.57998e+06	1.85917e+07	7.53769e+06	7.96287e+06	5.53112e+06	2.34511e+07	21448.8	3.41318e+06	1.58201e+07	3.79182e+07	1.04905e+07	2.39596e+07	4.54503e+06	3.03786e+07	3.56469e+07	5.77392e+07	3.1909e+07	4.86192e+07	1.02107e+07	1.16417e+07	8.08209e+06	3.64978e+07	1.11665e+07	8.85869e+06	2.76239e+07	2.56301e+07	1.41621e+07	2.2851e+07	1.7251e+06	7.30402e+07	5.20589e+07	3.49092e+07	6.93386e+07	2.81858e+07	4.34373e+07
V365	HESI(+)	608.598	10.46	9.12	M+H	Cer(d18:1_21:0)	Cer 39:1	3.06608e+08	2.50559e+08	4.97431e+07	6.01239e+07	1.15726e+08	1.38641e+08	1.78912e+07	2.05156e+07	2.82526e+07	1.74835e+07	1.62261e+07	2.44179e+07	1.31851e+07	2.04647e+07	1.49437e+07	1.79963e+07	1.04105e+07	1.58237e+07	2.26016e+07	2.67975e+07	3.58846e+07	2.85673e+07	2.75082e+07	2.99696e+07	1.71293e+08	1.6209e+07	1.05308e+07	4.88909e+06	9.83665e+06	1.11208e+07	1.3917e+07	3.23237e+06	9.1092e+06	2.66423e+07	1.62313e+07	6.52107e+06
V366	HESI(+)	608.633	11.31	10.33	M+H	Cer(m18:0_22:0)	Cer O-40:0	4.02372e+07	2.47836e+07	1.56959e+07	2.26138e+07	1.88856e+07	2.40897e+07	1.22079e+07	1.06548e+07	1.45882e+07	1.1011e+07	1.63011e+07	1.53754e+07	1.3716e+07	1.64594e+07	2.01563e+07	1.85112e+07	2.93552e+07	2.2951e+07	1.71049e+07	1.59814e+07	1.87754e+07	2.96587e+07	2.09219e+07	1.50658e+07	2.67499e+07	1.17855e+07	1.35375e+07	1.46365e+07	1.14615e+07	1.86423e+07	2.27752e+07	2.33324e+07	3.82766e+07	2.34832e+07	3.08376e+07	4.76653e+06
V367	HESI(+)	609.414	5.58	4.72	M+H	PG(O-9:0_16:1)	PG O-25:1	8.0777e+07	9.02391e+07	1.17833e+08	8.56555e+07	5.2673e+07	2.46188e+08	1.19453e+08	2.5924e+08	9.56083e+07	6.09183e+07	2.55707e+07	1.64928e+08	1.34675e+07	1.47919e+06	824145	2.11808e+07	2883.9	3.03337e+06	1.90788e+08	287343875	1.93167e+08	1.73564e+08	2.37492e+08	1.18201e+08	3.06905e+07	2.77402e+08	3.88588e+08	268634342	4.78533e+08	3.29907e+08	3.18373e+06	842216	11177.3	1.1037e+07	0	0
V368	HESI(+)	609.449	5.58	4.73	M+Na	DG(18:4_16:1)	DG 34:5	6.24955e+07	1.27268e+08	9.31912e+07	8.71906e+07	5.98033e+07	1.47284e+08	2.05246e+08	2.93727e+08	5.02669e+07	4.76885e+07	2.46515e+07	1.73294e+08	2.14973e+07	2.28514e+06	2.15633e+06	2.39258e+07	0	3.56585e+06	8.69887e+07	1.33867e+08	1.04088e+08	7.86429e+07	1.94808e+08	6.40875e+07	2.4499e+07	3.95743e+08	4.93416e+08	2.59286e+08	347367952	4.79595e+07	1.73488e+06	356190	632842	16616036	0	0
V369	HESI(+)	610.54	9.27	7.24	M+NH4	DG(16:0_18:2)	DG 34:2	5.18611e+08	8.85315e+08	3011996266	3768591986	1055494119	2943094932	1035217003	1643697555	3396915170	4442692402	5367471696	2640956154	4575311803	4492402951	5959984060	2160821310	9202151875	3823274045	4941604570	2485020796	2302020862	8.12231e+08	8348700315	7951277310	6581146447	5769527122	4023103834	3162153705	3585011799	1499292488	2780124424	7946195385	2225852566	11726868986	4427712068	4288217771
V370	HESI(+)	610.543	9.76	7.96	M+Na	DG(16:0_18:2)	DG 34:2	1.60235e+07	2.05032e+07	8.49348e+07	3.00407e+07	6.22958e+07	4.30436e+07	1.93527e+07	1.07302e+07	6.63764e+07	2.61755e+07	3.0146e+07	1.79608e+07	2.39883e+07	3.38494e+07	2.98979e+07	3.31996e+07	5.76137e+07	2.6755e+07	7.74359e+07	5.79698e+07	3.04798e+07	6.16619e+07	9.70644e+07	118031658	6.30903e+07	3.02531e+07	7.46634e+07	4.88897e+07	3.88778e+07	2.04139e+07	4.91641e+07	4.43462e+07	3.92795e+07	7.76105e+07	2.88053e+07	2.70266e+07
V371	HESI(+)	610.543	9.23	7.19	M+NH4	DG(16:1_18:1)	DG 34:2	2813764407	3392036437	2561184572	3255196275	4798735905	2413721907	3475540331	1312323520	3049406911	3846803850	4412659140	2233053007	4831896989	2768434769	5157617471	6400642400	7611714564	4317276526	5560497424	6364038306	5387562577	3845994678	6695974555	6341924304	6517323929	4539524336	3589357644	2599959308	2982833675	1204289525	10141138709	6962846728	6808693609	9510687195	5106431726	4010122121
V372	HESI(+)	611.357	1.08	0.88	M+H	MePC(23:6)	MePC 23:6	1.87549e+07	1.38047e+07	5.36451e+07	4.81751e+07	3.80348e+07	3.50994e+07	1.73361e+07	1.09039e+07	1.95495e+07	1.61507e+07	2.06688e+07	6.34002e+07	7.29768e+07	4.22316e+07	6.05269e+07	7.66789e+07	6.18138e+07	7.11226e+07	3.05635e+07	1.15853e+07	1.11348e+07	1.38265e+07	3.81592e+07	1.3505e+07	1.7356e+07	2.10567e+07	2.47414e+07	1.04036e+07	1.44638e+07	3.36292e+07	1.06988e+07	1.53335e+07	6.20684e+07	6.60666e+07	4.18307e+07	2.02071e+07
V373	HESI(+)	611.428	5.61	4.74	M+Na	TG(18:4_7:0_8:0)	TG 33:4	6.65836e+07	9.35826e+07	4.4554e+08	7.85848e+07	8.4251e+07	185536834	1.69138e+08	2.06009e+08	8.10696e+07	1.15001e+08	1.3175e+08	7.81351e+08	2.117e+07	2.17048e+06	2.6833e+06	2.00078e+07	0	1.90902e+07	4.90601e+08	1.5927e+08	126357810	9.22863e+07	8.7231e+08	3.39581e+08	2.62107e+07	1092402719	3.28565e+08	9.19203e+08	5.43312e+08	951680023	1.22962e+07	361152	764526	1.06955e+07	102626	0
V374	HESI(+)	611.43	4.33	4.01	M+Na	TG(20:4_5:0_8:0)	TG 33:4	1.78979e+07	2.81299e+07	4.91788e+07	3.05502e+07	2.30709e+07	5.58549e+07	2.54419e+07	3.5753e+07	1.69966e+07	1.34525e+07	1.01611e+07	5.08366e+07	3.0771e+06	549110	596621	6.13059e+06	0	826099	6.42971e+07	5.5247e+07	5.31764e+07	6.8586e+07	9.13085e+07	3.82868e+07	5.14191e+06	6.61305e+07	9.31787e+07	7.18822e+07	5.12041e+07	101656248	492220	108193	1.33247e+06	9.17243e+06	85537.4	0
V375	HESI(+)	611.43	6.28	5.03	M+Na	TG(20:4_4:0_9:0)	TG 33:4	2.07992e+07	2.86527e+07	3.25828e+07	1.99055e+07	1.02095e+07	4.32539e+07	2.19886e+07	4.79185e+07	1.82339e+07	7.26289e+06	3.27931e+06	3.85218e+07	5.69804e+06	0	716894	7.93163e+06	0	916438	7.21721e+07	9.7583e+07	5.16489e+07	6.73841e+07	6.62071e+07	2.82968e+07	7.86547e+06	8.85015e+07	1.39022e+08	1.0037e+08	9.46263e+07	5.66944e+07	5968.9	115776	594035	1.06084e+07	0	245084
V376	HESI(+)	611.43	5.56	4.72	M+H	PG(O-9:0_16:0)	PG O-25:0	3.15526e+08	4.68778e+08	4.89503e+08	2.99308e+08	3.24593e+08	8.44188e+08	6.01144e+08	797394801	2.92554e+08	1.19291e+08	1.32447e+08	776433800	7.19645e+07	1.08266e+07	1.77967e+07	7.39803e+07	0	1.77177e+07	4.77717e+08	7.71756e+08	5.35811e+08	4.79555e+08	8.68968e+08	3.51477e+08	1.32382e+08	1092132805	1441423945	9.09352e+08	1758828262	2.44642e+08	1.15356e+07	5.26687e+06	8.57461e+06	5.55056e+07	0	0
V377	HESI(+)	611.466	5.71	4.79	M+Na	DG(16:1_18:3)	DG 34:4	5.28524e+07	1.63593e+08	6.85988e+07	7.49372e+07	6.00513e+07	5.69448e+07	1.82969e+08	3.3773e+08	3.00453e+07	4.99227e+07	1.94402e+07	140396471	3.1476e+06	2.64002e+06	3.59346e+06	1.39032e+07	0	2.87315e+06	4.69065e+07	1.37075e+08	1.02945e+08	8.66994e+07	206264242	3.93346e+07	2.34046e+07	7.13974e+07	5.36982e+08	2.23892e+08	468534307	6.79935e+07	1.16737e+06	808717	3.32782e+06	2.28381e+07	1.8074e+06	0
V378	HESI(+)	612.558	9.83	8.08	M+NH4	DG(16:0_18:1)	DG 34:1	1107941431	1297309631	2024402114	2468529503	1857854560	8.93667e+08	1902916534	7.51359e+08	2189091297	2004740327	2654150622	2151655185	4342643456	2406747965	4764670435	5770219306	7511352143	5798392564	2639566452	2732189541	2185528970	1847720378	2226451366	1984870592	3699728693	3165927647	2175523514	2614092702	2357017012	1833144600	14595997223	10449832124	7772566172	11061414738	5955717274	6736331064
V379	HESI(+)	612.558	10.44	9.09	M+NH4	TG(O-13:0_18:1_3:0)	TG O-34:1	3.45714e+07	3.9464e+07	4.02247e+07	5.37924e+07	4.94282e+07	3.23717e+07	3.75313e+07	2.33462e+07	5.50514e+07	5.25118e+07	6.53195e+07	6.08554e+07	7.25584e+07	4.31701e+07	7.5729e+07	9.41778e+07	3.44419e+07	5.50066e+07	7.19325e+07	6.53279e+07	5.69222e+07	4.66182e+07	5.60007e+07	5.82716e+07	8.96887e+07	7.36049e+07	4.9631e+07	6.8983e+07	5.3934e+07	25874731	1.24588e+08	1.00301e+08	9.49553e+07	1.75848e+08	3.26407e+07	3.86253e+07
V380	HESI(+)	613.443	3.48	3.31	M+Na	TG(8:0_8:0_17:3)	TG 33:3	6.66787e+06	1.62184e+07	1.74483e+07	17844410	1.09852e+07	1.27539e+07	2.54724e+07	2.69548e+07	5.76059e+06	5.79183e+06	3.79337e+06	3.09273e+07	2.28294e+06	271063	537090	2.38054e+06	0	1.86858e+06	5.42453e+07	2.17955e+07	1.40342e+07	1.94223e+07	3.47754e+07	9.32972e+06	2.37068e+06	4.37636e+07	6.37106e+07	3.20978e+07	6.89292e+07	2.76432e+07	217211	67562.2	53194.9	1.7481e+06	190101	54228.8
V381	HESI(+)	613.443	6.23	5.01	M+Na	TG(21:3_4:0_8:0)	TG 33:3	3.79302e+07	6.82053e+07	8.43758e+07	7.22037e+07	4.32633e+07	7.7661e+07	1.02791e+08	1.38052e+08	4.50471e+07	4.38407e+07	1.562e+07	1.45608e+08	1.14763e+07	1.93012e+06	1.48255e+06	2.28347e+07	0	2.43147e+06	1.07638e+08	2.42891e+08	1.3138e+08	1.30887e+08	1.65278e+08	6.17522e+07	2.3059e+07	2.15584e+08	4.17015e+08	3.93804e+08	575173818	203521458	3.71877e+06	1.01751e+06	2.40778e+06	2.24335e+07	757725	30504
V382	HESI(+)	613.444	5.66	4.76	M+Na	TG(27:3_3:0_3:0)	TG 33:3	2.01972e+07	3.16604e+07	4.9834e+07	4.64698e+07	2.46037e+07	5.20549e+07	6.77479e+07	8.30932e+07	3.38868e+07	4.0653e+07	2.37394e+07	126553164	7.26984e+06	1.54074e+06	1.73246e+06	7.37029e+06	0	1.91333e+06	3.86344e+07	4.82123e+07	5.31762e+07	2.9212e+07	8.23621e+07	2.69543e+07	1.12057e+07	9.62253e+07	9.81269e+07	9.60619e+07	2.39382e+08	1.45643e+08	296052	139565	59151.3	3.1131e+06	105415	0
V383	HESI(+)	613.446	3.42	3.26	M+H	TG(27:6_4:0_4:0)	TG 35:6	4.472e+07	1.24418e+08	1.18552e+08	1.05561e+08	6.49411e+07	9.74183e+07	1.58512e+08	1.95971e+08	4.45235e+07	4.91322e+07	2.74593e+07	2.22045e+08	1.82412e+07	2.74477e+06	4.1619e+06	1.53481e+07	3736.68	3.62324e+06	1.15064e+08	2.02247e+08	1.90861e+08	1.42144e+08	2.71817e+08	8.69166e+07	1.96376e+07	3.601e+08	5.78656e+08	2.73381e+08	7.64677e+08	2.6268e+08	1.55341e+06	1.19443e+06	1.01589e+06	2.07509e+07	1.88425e+06	13278.4
V384	HESI(+)	614.551	9.26	7.23	M+Na	DG(16:0_18:0)	DG 34:0	9.48962e+06	7.00831e+06	6.6737e+06	7.47911e+06	7.82746e+06	2.88944e+06	3.02811e+07	7.96316e+06	1.03494e+07	9.71043e+06	1.3146e+07	5.44258e+06	1.70239e+07	1.11619e+07	1.55783e+07	1.40286e+07	101304096	2.21575e+07	5.57667e+06	7.89571e+06	6.03441e+06	2.71874e+06	1.73925e+07	8.98499e+06	1.2468e+07	1.23791e+07	9.83531e+06	1.02418e+07	1.02768e+07	4.53926e+06	1.33388e+08	5.09793e+07	1.37627e+08	1.34608e+08	2.31628e+08	4.52006e+07
V385	HESI(+)	614.572	10.45	9.11	M+NH4	DG(16:0_18:0)	DG 34:0	8.03833e+07	6.20161e+07	3.80066e+07	4.80103e+07	5.5914e+07	5.24087e+07	5.55761e+07	6.76539e+07	6.84256e+07	6.68376e+07	5.50688e+07	5.86732e+07	2.21976e+07	3.06694e+07	2.55793e+07	4.54385e+07	3.30225e+07	3.44635e+07	1.00417e+08	1.04824e+08	8.41103e+07	6.26727e+07	9.58397e+07	7.85388e+07	1.12789e+08	7.88858e+07	4.71714e+07	6.31146e+07	5.04299e+07	4.20952e+07	6.61664e+07	5.05426e+07	1.95798e+07	9.47265e+07	1.99994e+07	2.91327e+07
V386	HESI(+)	615.458	5.62	4.75	M+Na	TG(17:2_8:0_8:0)	TG 33:2	7.52919e+07	2.34118e+08	2.2928e+08	2.66821e+08	1.79579e+08	184352212	5.60073e+08	4.5858e+08	1.07967e+08	134185396	7.35388e+07	7.67966e+08	5.15037e+07	1.00763e+07	1.18977e+07	5.25235e+07	618023	1.37636e+07	1.34793e+08	3.4031e+08	2.83471e+08	1.60519e+08	5.38502e+08	1.35901e+08	7.81125e+07	1104783704	1459074066	6.86671e+08	1913315103	3.77614e+08	2.77594e+06	3.57442e+06	10093.5	3.89456e+07	4.08559e+06	1.08181e+06
V387	HESI(+)	615.459	5.7	4.78	M+H	TG(20:4_10:1_5:0)	TG 35:5	1.33252e+07	3.69946e+07	3.81567e+07	4.17293e+07	3.30764e+07	2.50633e+07	7.48386e+07	6.91086e+07	2.15397e+07	2.07173e+07	1.25535e+07	1.29982e+08	8.22392e+06	1.81372e+06	2.29706e+06	1.05475e+07	840190	3.07461e+06	2.38094e+07	5.30939e+07	4.50766e+07	2.88573e+07	8.91531e+07	2.22503e+07	1.19918e+07	1.40554e+08	1.9052e+08	117846067	3.15621e+08	61848283	2.95568e+06	150758	1.41324e+06	8.94125e+06	4.35191e+06	0
V388	HESI(+)	615.495	9.28	7.25	M+Na	DG(16:0_18:2)	DG 34:2	3406665398	7.82512e+08	3092043761	8.97438e+08	5829636228	3311947513	2771357996	4.23545e+08	909843244	3592381183	4362513399	2413527101	5552560414	3002260765	4927380298	6910238695	9545906259	4311600722	4772114064	5060395608	4982606356	9.80781e+08	1797793934	1462073441	1047572122	3803018840	2971256268	2812466356	2978131552	1530175241	8754065108	6069006279	6583874446	9472686552	5675491131	4668642951
V389	HESI(+)	615.499	9.24	7.2	M+H	DG(16:0_20:5)	DG 36:5	2854455265	3535730214	2613948571	2879193625	4909279317	2791121483	2335661378	1216024924	2583779197	3034203950	3795578538	2016826963	4861636573	2550901418	4508105534	6313541843	8189116199	3784059625	4254048970	4238059794	4191343212	3134724778	6100844172	6646409400	4430678103	3201483845	2498050304	2359959661	2492903418	1218732418	7367063961	5116900672	5569211171	8012041530	4756047678	4246074171
V390	HESI(+)	615.509	6.05	4.93	M+Na	WE(O-18:3_23:4)	WE O-41:7	9.0363e+06	1.41049e+07	3.58359e+07	1.7094e+07	1.44247e+07	1.37368e+07	9.61208e+06	1.45264e+07	7.82853e+06	5.61829e+06	4.16775e+06	1.64276e+07	1.81852e+06	387908	217683	1.91493e+06	167006	375443	2.70449e+07	2.74204e+07	2.243e+07	22865498	2.81561e+07	1.60753e+07	3.95946e+06	2.834e+07	3.82821e+07	2.58568e+07	3.73801e+07	1.89865e+07	342580	241697	327697	5.04203e+06	212384	239579
V391	HESI(+)	616.564	10.03	8.41	M+H	Cer(d18:1_22:3)	Cer 40:4	3.56153e+08	3.30542e+08	1.2364e+08	1.36226e+08	1.85101e+08	226155604	6.5687e+07	1.15795e+08	1.38339e+08	7.44103e+07	6.00172e+07	1.19249e+08	9.75328e+07	1.61776e+08	1.13709e+08	1.01378e+08	1.20638e+08	1.41109e+08	1.17599e+08	9.92935e+07	1.29371e+08	1.05665e+08	1.13164e+08	154172921	289201209	8.1654e+07	7.53598e+07	1.03481e+08	8.00625e+07	1.49587e+08	1.04337e+08	1.07482e+08	119589978	1.24426e+08	2.08048e+08	2.10287e+08
V392	HESI(+)	616.604	10.45	9.1	M+H-H2O	Cer(d18:1_23:1)	Cer 41:2	5.44029e+08	4.9463e+08	4.09449e+08	514759491	4.10952e+08	2.51334e+08	5.63417e+08	3.12897e+08	3.69693e+08	3.99244e+08	552828804	3.42438e+08	2.82207e+08	2.81083e+08	253991996	2.91771e+08	1.52273e+08	2.59065e+08	1.76474e+08	2.19112e+08	2.39921e+08	1.86596e+08	2.38186e+08	2.18848e+08	5.69226e+08	2.94272e+08	1.95161e+08	1.50958e+08	1.75513e+08	1.74199e+08	2.11113e+08	1.96195e+08	1.76394e+08	3.90586e+08	3.06278e+08	1.25786e+08
V393	HESI(+)	616.604	10.6	9.34	M+H-H2O	Cer(d18:2_23:0)	Cer 41:2	4.46171e+08	4.17657e+08	3.40142e+08	4.4721e+08	5.43935e+08	298256702	8.65719e+07	101791589	1.21159e+08	1.29887e+08	1.03572e+08	8.88106e+07	3.85637e+07	4.72836e+07	4.97561e+07	3.7148e+07	2.22658e+07	4.74426e+07	2.68419e+08	248182828	3.12967e+08	2.67986e+08	332038780	2.4714e+08	1.77411e+08	8.65824e+07	4.88191e+07	9.73376e+07	8.78455e+07	1.03057e+08	4.29163e+07	2.97006e+07	2.88185e+07	6.17887e+07	5.26173e+07	1.69625e+07
V394	HESI(+)	617.512	9.83	8.07	M+Na	DG(16:0_18:1)	DG 34:1	3282336557	3820063665	6671967314	6961542532	6167363184	3633098626	4287090507	2337523035	5747953375	5952520672	7405430956	6297076612	11801162908	6135462944	11794701281	12590550503	16057165121	14480680833	8041739184	6099912766	5853869645	5268142447	6121629816	6373170606	6973477378	6955341743	5967727054	7415132300	5942370970	6142692672	15636675605	13873225941	13668005780	17565011575	14194752408	14797394319
V395	HESI(+)	617.513	10.42	9.06	M+H	TG(O-12:0_4:0_20:4)	TG O-36:4	1.28061e+08	6.87646e+07	161766105	1.69733e+08	1.81698e+08	1.56558e+08	1.38752e+08	4.86025e+07	1.06391e+08	2.11438e+08	1.14376e+08	2.6847e+08	2.64427e+08	1.32849e+08	2.25533e+08	3.45417e+08	1.06177e+08	3.29029e+08	1.90376e+08	1.23562e+08	1.21128e+08	1.04344e+08	1.20767e+08	1.26695e+08	3.98085e+08	2.19506e+08	101869959	1.71008e+08	1.15494e+08	8.49254e+07	1.37561e+08	1.19046e+08	1.05697e+08	396595747	9.06262e+07	1.03049e+08
V396	HESI(+)	617.513	9.1	7.02	M+H	DG(18:2_18:2)	DG 36:4	8.52796e+07	9.22659e+07	1.01478e+08	1.22581e+08	9.74334e+07	1.04337e+08	134469655	1.01904e+08	1.0074e+08	1.50496e+08	1.35982e+08	1.19515e+08	2.83285e+08	1.24789e+08	1.94588e+08	347132062	3.31442e+08	1.49652e+08	1.49164e+08	1.49194e+08	1.33626e+08	1.06413e+08	2.25992e+08	1.8121e+08	6.87234e+07	2.06888e+08	1.82411e+08	1.49716e+08	1.39013e+08	1.14478e+08	3.51851e+08	2.48783e+08	3.89616e+08	4.08046e+08	1.66796e+08	130259632
V397	HESI(+)	617.513	10.11	8.54	M+H	DG(18:1_18:3)	DG 36:4	3.67857e+07	9.94471e+07	6.16385e+07	8.31482e+07	7.59768e+07	4.25513e+07	7.27419e+07	2.7193e+07	6.22094e+07	6.34284e+07	1.36463e+08	2.4151e+08	4.3306e+08	6.71734e+07	4.79618e+08	6.57301e+08	7.85823e+08	6.69789e+08	3.58935e+08	2.99169e+08	2.44165e+08	6.70711e+07	7.92589e+07	8.54332e+07	1.74664e+08	7.71732e+07	5.75993e+07	3.03014e+08	7.27513e+07	6.0736e+07	1675295552	1422752464	7.04859e+08	1347221431	5.54879e+08	1029673411
V398	HESI(+)	617.513	8.98	6.88	M+H	TG(O-15:1_18:3_3:0)	TG O-36:4	6.54748e+06	6.66626e+06	5.4472e+07	8.38428e+06	1.07486e+07	8.51484e+06	7.70814e+06	4.97254e+06	7.52949e+06	9.59667e+06	9.09282e+06	4.15687e+07	8.67923e+06	4.4966e+06	1.22087e+07	1.10517e+07	2.5428e+07	6.80277e+06	1.64364e+07	2.7698e+07	1.38134e+07	1.10464e+07	1.74085e+07	1.84453e+07	1.84639e+07	8.85044e+06	8.95277e+06	4.81689e+07	1.07712e+07	5.12199e+07	2.05252e+07	1.66114e+07	2.05453e+07	2.27256e+07	6.90251e+06	6.5855e+06
V399	HESI(+)	617.516	8.69	6.56	M+H	TG(O-15:2_3:0_18:2)	TG O-36:4	1.25349e+08	137745974	1.05608e+08	1.07575e+08	2.3875e+08	1.17759e+08	179027888	1.42118e+08	1.78585e+08	2.74962e+08	253040926	1.0836e+08	1.17609e+08	2.20059e+08	1.32045e+08	278078253	2.97036e+08	8.30898e+07	3.80857e+08	4.74316e+08	3.67315e+08	2.85124e+08	9.19661e+08	7.69733e+08	279004634	2.06476e+08	2.32395e+08	1.50485e+08	1.91358e+08	8.77485e+07	1.99514e+08	1.33976e+08	1.44679e+08	2.10983e+08	8.47929e+07	3.12803e+07
V400	HESI(+)	618.394	1.76	1.57	M+H	LPC(P-27:8)	LPC O-27:9	0	0	0	322956	71646.9	2.19795e+06	0	0	6.39713e+07	0	0	1.11807e+06	0	0	0	0	0	0	7.97193e+06	1.53431e+07	2.79277e+07	0	1.46962e+07	3.5833e+07	4.24751e+06	3.42417e+07	2.3843e+06	3.21247e+07	6.16047e+06	13621195	0	0	0	0	0	0
V401	HESI(+)	618.584	9.42	7.44	M+H	Cer(d18:1_22:2)	Cer 40:3	1.36937e+08	152081652	1.73886e+08	2.29659e+08	2.41878e+08	9.0057e+07	2.99972e+08	2.1227e+08	1.89381e+08	228702434	2.60825e+08	1.495e+08	1.50649e+08	297230407	1.75627e+08	1.64632e+08	1.15235e+08	1.74068e+08	7.38791e+07	6.65644e+07	7.14221e+07	6.4497e+07	9.03894e+07	9.70823e+07	3.0095e+08	2.1206e+08	1.88586e+08	1.91534e+08	1.24545e+08	1.73704e+08	1.65449e+08	1.75749e+08	1.98497e+08	154396191	2.24844e+08	1.43668e+08
V402	HESI(+)	618.619	11.14	10.12	M+H-H2O	Cer(d18:1_23:0)	Cer 41:1	3.57165e+08	3.15311e+08	1.35537e+08	1.51574e+08	2.2318e+08	2.04606e+08	2.3337e+07	5.57431e+07	8.60868e+07	3.80914e+07	3.96802e+07	7.34617e+07	4.39964e+07	4.1809e+07	4.35842e+07	4.91831e+07	3.01307e+07	4.80024e+07	8.93207e+07	1.07899e+08	9.97552e+07	9.13949e+07	7.9603e+07	1.24717e+08	1.13531e+08	3.98562e+07	3.42416e+07	4.62525e+07	3.96496e+07	6.79697e+07	4.20299e+07	2.24974e+07	3.64878e+07	7.04384e+07	5.17245e+07	1.54872e+07
V403	HESI(+)	619.42	2.82	2.69	M+NH4	DG(17:3_18:4)	DG 35:7	689048	3.73421e+06	4.03451e+06	2.0557e+06	2.32384e+06	5.54059e+06	4.82303e+06	6.02447e+06	1.87515e+06	1.28508e+06	497200	7.25346e+06	112977	724322	468103	662064	300764	289491	3.73038e+06	6.44399e+06	4.09319e+06	3.95054e+06	8.84363e+06	2.07617e+06	417410	1.18885e+07	1.00815e+07	6.03768e+06	1.56821e+07	5.81576e+06	322610	378554	46311.8	609539	508277	20328.7
V404	HESI(+)	619.529	10.45	9.1	M+Na	DG(16:0_18:0)	DG 34:0	4.957e+08	4.5404e+08	342030582	3.21223e+08	4.24206e+08	5.21028e+08	3.36448e+08	3.69276e+08	3.97262e+08	5.02894e+08	4.76487e+08	5.19254e+08	3.21049e+08	3.12039e+08	3.17067e+08	4.50662e+08	4.86886e+08	3.62158e+08	7.56106e+08	487429547	4.85055e+08	3.84905e+08	6.4961e+08	6.02049e+08	6.81256e+08	3.91641e+08	3.03538e+08	4.42194e+08	3.26584e+08	2.4587e+08	6.1865e+08	5.19732e+08	2.83094e+08	7.86082e+08	3.0914e+08	4.1991e+08
V405	HESI(+)	619.529	9.35	7.35	M+H	TG(O-11:0_5:0_20:3)	TG O-36:3	2.36892e+08	3.16251e+08	4.89155e+08	6.0956e+08	6.83629e+08	2.38753e+08	1059627278	6.3769e+08	1172524123	1175650176	1266649973	9.90792e+08	1174004967	1075436759	1203414304	1515183535	1921201661	1070736452	1219305801	1232090447	1120021883	9.64359e+08	1399571770	1503981461	1077286069	1208573797	1158631835	1036770701	1092787896	2.89592e+08	1768598720	1727726308	1351459602	1932871054	1137236862	1124132995
V406	HESI(+)	619.53	9.42	7.44	M+H	DG(16:0_20:3)	DG 36:3	5.89726e+07	8.09394e+07	9.32126e+07	1.17466e+08	1.32398e+08	5.59114e+07	1.46405e+08	9.76036e+07	1.84919e+08	1.58788e+08	2.62429e+08	1.42105e+08	2.50213e+08	1.58101e+08	2.47898e+08	285956024	3.68821e+08	2.24526e+08	2.5946e+08	1.93414e+08	1.63093e+08	1.35708e+08	2.92004e+08	3.36375e+08	1.33959e+08	2.00184e+08	1.3316e+08	163745105	172687755	4.96074e+07	3.46079e+08	2.88087e+08	301801447	4.93202e+08	2.4791e+08	1023808718
V407	HESI(+)	620.368	1.93	1.76	M+H	LPC(26:8)	LPC 26:8	6.95195e+07	6.17268e+07	4.48696e+07	7.53479e+07	8.90318e+07	3.56579e+07	6.76453e+07	7.65815e+07	6.61381e+07	7.98544e+07	1.10767e+08	5.55476e+07	4.5912e+07	6.62802e+07	4.52814e+07	6.1483e+07	4.16773e+07	3.74786e+07	7.23391e+07	5.44735e+07	5.45191e+07	4.62302e+07	1.04468e+08	8.9189e+07	8.64089e+07	5.15034e+07	5.21902e+07	4.77955e+07	3.9453e+07	3.35355e+07	4.43135e+07	6.64009e+07	2.94264e+07	3.20601e+07	2.44861e+07	1.40263e+07
V408	HESI(+)	620.408	2.1	1.94	M+H	LPC(P-27:7)	LPC O-27:8	4.16272e+08	6.16423e+08	6.40812e+08	5.89213e+08	1114457697	735995910	7.45087e+08	7.55737e+08	3147083451	1001280103	662135160	1081020981	1.74508e+06	1.19148e+06	1.2932e+06	4.6439e+06	971298	1.34287e+06	9.7988e+08	1504856670	1250095133	2.72558e+08	1298467363	2045852145	2195840761	2206187733	1731405492	2901663416	2665475710	1995446346	495835	305621	600774	1.02145e+07	1.27392e+06	478378
V409	HESI(+)	620.598	10.69	9.48	M+H	Cer(d18:2/22:0)	Cer 40:2	8.84843e+06	1.12292e+07	1.82764e+07	3.34649e+07	1.07401e+07	1.44266e+07	1.4181e+07	8.34049e+06	1.26642e+07	1.0097e+07	5.21218e+06	1.14117e+07	2.70359e+06	3.93639e+06	3.58019e+06	7.25156e+06	4.44987e+06	4.32199e+06	2.26357e+07	3.11857e+07	2.25333e+07	2.61781e+07	2.43777e+07	2.60872e+07	1.05084e+07	1.64103e+07	1.40859e+07	1.77597e+07	1.90547e+07	1.52222e+07	8.50977e+06	2.55551e+06	1.00192e+07	1.59746e+07	1.5591e+07	8.21478e+06
V410	HESI(+)	620.598	10.22	8.73	M+H	Cer(d18:2_22:0)	Cer 40:2	1486584997	1483334256	5.01287e+08	5.55266e+08	1037968459	984174830	3.7947e+08	2.29495e+08	2.15238e+08	2.11618e+08	3.01785e+08	2.0474e+08	1.14242e+08	2.38553e+08	1.43859e+08	1.42179e+08	1.12428e+08	1.40155e+08	3.04203e+08	2.42393e+08	3.43046e+08	2.62519e+08	3.37758e+08	2.66876e+08	1305192123	1.48932e+08	1.4711e+08	1.96672e+08	1.30156e+08	2.2618e+08	2.08352e+08	2.00249e+08	1.10757e+08	1.58996e+08	2.43595e+08	7.41714e+07
V411	HESI(+)	620.599	10.07	8.48	M+H	Cer(d18:1_22:1)	Cer 40:2	819907640	8.93092e+08	8.89943e+08	1098277607	1378285607	532382616	1636699749	5.9545e+08	8.25295e+08	8.67733e+08	1441283994	7.03146e+08	6.15071e+08	7.19593e+08	7.72476e+08	6.7601e+08	5.59988e+08	917327638	191067657	2.09509e+08	1.30864e+08	1.93453e+08	2.15617e+08	213671870	1417989775	7.42825e+08	7.05125e+08	5.6798e+08	5.12436e+08	719240195	7.8124e+08	9.08685e+08	1016458125	7.25403e+08	1491748912	1371143957
V412	HESI(+)	620.599	10.64	9.4	M+H	Cer(d18:1/22:1)	Cer 40:2	1.16397e+07	1.41446e+07	1.8356e+07	1.37652e+07	1.40325e+07	1.44472e+07	1.2148e+07	8.31332e+06	1.39377e+07	1.11155e+07	9.39617e+06	1.17194e+07	8.98176e+06	5.65005e+06	1.18002e+07	1.79806e+06	4.44254e+06	1.06259e+07	6.81573e+06	3.10421e+07	2.23992e+07	2.67066e+07	8.46525e+06	2.63704e+07	1.60268e+07	1.62183e+07	3.72242e+06	4.96657e+06	1.84139e+07	4.15263e+06	8.29992e+06	4.35022e+06	9.62561e+06	1.50648e+07	1.5191e+07	7.87445e+06
V413	HESI(+)	621.303	1.28	1.07	M+H	LPI(20:4)	LPI 20:4	2.51504e+07	2.33946e+07	1.23283e+08	4.00357e+07	3.62583e+07	2.62301e+07	8.03733e+07	4.53081e+07	4.62879e+07	5.75933e+07	7.29922e+07	5.55232e+07	6.10849e+07	6.62668e+07	7.76615e+07	5.46263e+07	2.62825e+07	6.17163e+07	4.70066e+07	8.32872e+07	6.15211e+07	3.93312e+07	5.01806e+07	5.32643e+07	6.938e+07	7.97711e+07	6.80127e+07	4.88602e+07	7.6246e+07	3.34194e+07	6.94541e+07	6.90317e+07	5.01139e+07	6.1051e+07	7.29261e+07	4.91826e+07
V414	HESI(+)	621.438	5.74	4.8	M+Na	DG(17:3_18:3)	DG 35:6	5.46792e+07	6.63811e+07	7.46169e+07	5.00865e+07	4.30299e+07	7.73494e+07	6.60188e+07	7.34418e+07	4.04724e+07	3.38049e+07	2.67414e+07	4.64226e+07	2.28956e+07	1.25164e+07	3.26912e+07	3.02942e+07	1.53017e+07	1.79436e+07	6.44672e+07	8.88193e+07	7.1802e+07	8.13993e+07	1.11241e+08	5.70573e+07	8.3565e+06	1.12258e+08	1.38507e+08	9.09988e+07	1.90785e+08	1.05753e+08	4.23199e+06	1.83154e+07	8.2059e+06	4.65021e+07	1.8834e+07	6.47894e+06
V415	HESI(+)	621.438	5.48	4.68	M+H	MePC(23:1)	MePC 23:1	9.43223e+07	1.50962e+08	1.68483e+08	1.21684e+08	9.31386e+07	2.19651e+08	2.00139e+08	2.19527e+08	9.24807e+07	7.37152e+07	4.73008e+07	2.4779e+08	4.58858e+07	6.2003e+06	2.10652e+07	3.93261e+07	4.27912e+06	1.5942e+07	1.56964e+08	2.59997e+08	2.10257e+08	1.77651e+08	358647840	1.17303e+08	4.68943e+07	3.9016e+08	4.72952e+08	3.12076e+08	6.06596e+08	2.92469e+08	1.22186e+07	5.41241e+06	5.03337e+06	5.80199e+07	1.56112e+07	1.48073e+07
V416	HESI(+)	621.545	9.98	8.32	M+H	DG(18:1_18:1)	DG 36:2	1.11422e+08	1.17745e+08	1.4596e+08	2.05149e+08	1.98816e+08	7.63508e+07	3.74218e+08	1.54526e+08	4.14929e+08	3.30998e+08	5.24582e+08	3.27201e+08	494725233	4.61556e+08	5.94306e+08	5.45337e+08	8.44219e+08	4.96389e+08	3.71699e+08	4.38607e+08	2.38353e+08	1.98892e+08	3.06793e+08	2.85909e+08	4.10345e+08	5.24279e+08	3.30339e+08	3.12312e+08	3.55618e+08	1.23071e+08	1354467872	1105529769	7.72605e+08	9.43796e+08	5.44975e+08	8.29643e+08
V417	HESI(+)	622.339	2.18	2.02	M+Na	PE(10:0_16:4)	PE 26:4	6.83291e+06	9.38631e+06	5.55424e+06	5.54536e+06	5.83043e+06	1.15377e+07	0	3.91702e+06	7.6457e+06	7.01573e+06	5.77407e+06	7.40396e+06	1.1495e+07	8.49318e+06	1.13192e+07	9.1158e+06	1.0143e+07	5.72309e+06	9.37848e+06	1.44547e+07	8.22971e+06	1.22486e+07	1.0134e+07	8.3052e+06	0	8.4117e+06	9.97337e+06	7.12255e+06	8.3466e+06	1.18938e+07	3.006e+06	8.49296e+06	8.03381e+06	8.24199e+06	8.8935e+06	6.47361e+06
V418	HESI(+)	622.383	2.14	1.98	M+H	PC(P-12:3_14:3)	PC O-26:7	1.67882e+07	1.40503e+07	3.65306e+07	3.97163e+07	1.92237e+07	1.04594e+07	2.17168e+07	4.0648e+07	2.335e+07	4.18213e+07	51842895	3.30791e+07	3.48125e+07	4.1046e+07	4.45561e+07	3.88676e+07	3.45302e+07	3.66654e+07	2.59362e+07	1.29432e+07	1.11982e+07	1.53968e+07	2.40878e+06	2.01972e+07	1.5803e+07	2.75924e+07	2.6335e+07	3.38881e+07	2.58264e+07	4.25567e+07	1.84728e+07	4.31285e+07	1.96783e+07	33880217	2.69589e+07	2.71044e+07
V419	HESI(+)	622.539	9.03	6.94	M+Na	DG(17:1_18:2)	DG 35:3	1.25927e+07	1.22044e+07	9.55039e+06	9.74963e+06	2.57822e+07	1.05854e+07	8.71619e+06	3.33973e+06	9.43874e+06	1.01021e+07	1.34149e+07	6.08084e+06	7.01952e+06	4.11985e+06	5.3176e+06	1.16975e+07	1.62983e+07	2.9081e+07	2.17071e+07	1.45691e+07	1.72118e+07	1.23506e+07	2.87706e+07	1.89804e+07	1.55969e+07	1.07963e+07	1.18127e+07	8.50225e+06	9.84853e+06	4.16296e+06	1.3304e+07	8.88493e+06	8.88383e+06	2.42326e+07	6.88295e+06	1.19994e+07
V420	HESI(+)	622.612	10.35	8.94	M+H	Cer(d18:1/22:0)	Cer 40:1	6.0643e+06	8.99975e+06	5.44169e+06	6.58942e+06	8.30313e+06	6.48304e+06	1.57463e+07	6.99587e+06	6.62679e+06	8.52323e+06	1.23854e+07	9.42136e+06	6.57923e+06	8.28115e+06	8.80809e+06	6.47032e+06	7.54106e+06	1.04427e+07	3.01604e+06	3.15071e+06	3.40869e+06	3.28325e+06	3.46189e+06	3.85491e+06	1.40653e+07	8.2946e+06	1.65853e+07	1.1091e+07	4.67562e+06	7.04014e+06	1.37008e+07	2.29363e+07	8.28543e+06	8.93372e+06	1.36036e+07	6.05631e+07
V421	HESI(+)	622.613	10.85	9.72	M+H	Cer(d18:1_22:0)	Cer 40:1	1.79642e+08	1.98329e+08	5.46276e+07	4.72848e+07	1.32117e+08	1.08937e+08	1.78384e+07	2.00075e+07	3.29948e+07	1.46837e+07	1.89934e+07	2.98779e+07	2.3703e+07	3.84452e+07	1.95452e+07	3.14475e+07	2.1205e+07	3.4027e+07	3.60061e+07	3.62719e+07	3.50296e+07	2.70939e+07	3.38747e+07	3.34209e+07	1.07864e+08	2.16317e+07	1.89106e+07	2.16758e+07	2.0729e+07	2.07393e+08	1.89255e+07	2.25116e+07	2.21754e+07	3.09695e+07	3.45983e+07	2.69506e+07
V422	HESI(+)	622.616	10.29	8.84	M+H	Cer(d18:0_22:1)	Cer 40:1	2.28158e+07	2.38693e+07	4.71812e+07	5.12792e+07	8.65587e+07	1.78e+07	8.89799e+07	4.65397e+07	6.17872e+07	5.29341e+07	8.57601e+07	5.2211e+07	3.01116e+07	4.75374e+07	5.61219e+07	4.049e+07	4.61448e+07	7.49288e+07	8.81702e+06	2.26393e+07	2.70611e+07	2.48639e+07	2.80555e+07	2.18852e+07	1.16659e+08	4.84814e+07	9.14816e+07	5.08358e+07	3.37629e+07	3.95966e+07	9.28194e+07	1.1646e+08	6.83947e+07	4.35765e+07	1.05203e+08	3.03598e+08
V423	HESI(+)	623.501	9.74	7.93	M+Na	DG(O-20:5_16:0)	DG O-36:5	8.6386e+06	1.24629e+07	9.703e+06	1.18787e+07	9.18242e+06	1.45707e+07	1.05873e+07	1.41532e+07	8.07779e+06	7.66593e+06	5.33001e+06	1.19373e+07	967447	2.80968e+06	943398	3.03509e+06	1.39029e+06	533694	8.05595e+06	2.59503e+07	1.2354e+07	1.56652e+07	2.24045e+07	9.73269e+06	5.37586e+06	1.9937e+07	1.69532e+07	1.27324e+07	4.71309e+07	3.89211e+07	792265	1.12596e+06	0	881126	1.81063e+06	408595
V424	HESI(+)	623.502	8.92	6.82	M+Na	DG(O-20:2_16:3)	DG O-36:5	266546	113200	3.52325e+06	251567	38435.1	713300	104399	174194	0	56620.2	65070.2	227312	9.58017e+06	2.37096e+06	4.0427e+06	1.49353e+07	1.37204e+07	9.78363e+06	1.74037e+06	4.7732e+06	993265	2.05876e+06	3.90692e+06	986271	1.68602e+06	635557	1.14823e+06	983040	2.73306e+06	5.43546e+06	1.67693e+07	6.81437e+06	1.69331e+07	1.72099e+07	1.1174e+07	7.24731e+06
V425	HESI(+)	623.563	10.56	9.28	M+H	DG(18:0_18:1)	DG 36:1	1.59356e+07	1.54093e+07	1.96124e+07	26261799	2.50219e+07	8.59027e+06	2.69707e+07	2.2116e+07	3.37435e+07	2.89206e+07	4.11399e+07	3.36836e+07	3.12433e+07	3.064e+07	3.74049e+07	4.24769e+07	6.20995e+07	4.44201e+07	4.12669e+07	5.04732e+07	2.4988e+07	2.02235e+07	3.44954e+07	3.28553e+07	4.09556e+07	3.74905e+07	2.06502e+07	4.0372e+07	3.07883e+07	1.82631e+07	9.25393e+07	8.45252e+07	3.31642e+07	7.97706e+07	3.92305e+07	5.86756e+07
V426	HESI(+)	624.536	1.98	1.81	M+Na	DG(17:1_18:1)	DG 35:2	0	0	0	0	385399	0	0	0	682476	0	0	0	0	0	0	303872	522025	0	1.35494e+06	0	759561	0	0	410616	796285	222866	0	0	301398	0	106300	0	0	530956	207051	254676
V427	HESI(+)	624.558	9.61	7.73	M+NH4	DG(17:1_18:1)	DG 35:2	1.00145e+08	9.41773e+07	1.28501e+08	1.5005e+08	1.99488e+08	6.8433e+07	8.35466e+07	5.4102e+07	1.21062e+08	1.01469e+08	1.54139e+08	1.00922e+08	9.33523e+07	6.6136e+07	128113583	1.34518e+08	1.64702e+08	124071160	202954382	1.69458e+08	1.4233e+08	1.61649e+08	2.77394e+08	2.20576e+08	137264240	1.60546e+08	1.15916e+08	1.17731e+08	132175107	6.66179e+07	2.39351e+08	1.92835e+08	1.82296e+08	3.66217e+08	1.34008e+08	1.13746e+08
V428	HESI(+)	624.594	10.63	9.38	M+NH4	DG(O-18:1_18:1)	DG O-36:2	1.25952e+07	1.45866e+07	1.82943e+07	2.40266e+07	1.35539e+07	6.95974e+06	1.89945e+07	3.31304e+07	3.35815e+07	2.56634e+07	2.88577e+07	3.15461e+07	1.47752e+06	2.40455e+06	3.32311e+06	2.90061e+06	707426	2.61242e+06	9.73394e+06	9.422e+06	1.42086e+07	9.7712e+06	2.12169e+07	2.67121e+07	1.55496e+07	1.92522e+07	1.49539e+07	7.39345e+06	1.0862e+07	5.57211e+07	0	2.8475e+06	748365	760119	408528	551374
V429	HESI(+)	625.412	4.23	3.93	M+H	PG(9:0_16:0)	PG 25:0	275463	1.64223e+06	1.66743e+06	1.25526e+06	167970	6.4392e+06	688068	820616	204672	770871	729973	5.0126e+06	456284	849988	1.15377e+06	557965	1.10366e+06	433469	2.20625e+06	7.78084e+06	6.37136e+06	3.90231e+06	7.25124e+06	630016	154843	2.07639e+07	7.70742e+06	3.91113e+06	4.12917e+07	6.74869e+06	802059	794822	348418	409063	265203	912701
V430	HESI(+)	625.483	6.22	5.01	M+Na	DG(17:1_18:3)	DG 35:4	380991	2.67946e+06	1.48557e+06	231975	648939	582174	2.74731e+06	4.70352e+06	306786	93869.6	0	403763	0	0	21711.8	5513.22	0	0	5.78257e+06	8.55182e+06	5.23058e+06	5.78233e+06	4.74688e+06	1.87084e+06	505061	9.56746e+06	1.50405e+07	3.76679e+06	2.57784e+07	8.58133e+06	79443.5	0	0	182493	0	0
V431	HESI(+)	625.484	5.56	4.72	M+H	TG(O-12:1_5:0_20:6)	TG O-37:7	1.18263e+08	2.23716e+08	2.17092e+08	208218571	1.45613e+08	2.24258e+08	3.26379e+08	3.91366e+08	5.24851e+07	8.99003e+07	2.66834e+07	3.65274e+08	3.49461e+07	3.03571e+06	4.29057e+06	2.9246e+07	0	4.6948e+06	2.23877e+08	3.98405e+08	3.12408e+08	2.58612e+08	5.18564e+08	1.58964e+08	2.76803e+07	5.88873e+08	7.69091e+08	4.76897e+08	9.96425e+08	1.52267e+08	5.85272e+06	4.17565e+06	3.91632e+06	4.8884e+07	11024.5	0
V432	HESI(+)	625.52	6.33	5.06	M+Na	DG(O-16:3_20:1)	DG O-36:4	8.71446e+06	1.77112e+07	2.3498e+07	1.03987e+07	1.08356e+07	8.32357e+06	2.18152e+07	4.59164e+07	4.32619e+07	1.11928e+07	3.70427e+07	3.68552e+07	2.86764e+07	2.76278e+07	4.12644e+07	4.10939e+07	1.8299e+07	1.28735e+07	1.04495e+07	1.57495e+07	1.90125e+07	1.74988e+07	8.95287e+06	9.47304e+06	1.788e+06	3.98154e+07	2.66047e+07	3.22914e+07	2.22984e+07	2.23165e+07	8.68343e+06	3.45847e+07	3.76468e+07	3.78352e+07	1.6038e+07	2.31706e+07
V433	HESI(+)	627.402	5.53	4.71	M+Na	DG(16:4_20:6)	DG 36:10	2.04097e+06	1.15833e+07	2.71128e+06	1.07632e+07	2.15581e+06	1.90015e+07	1.152e+07	1.07714e+07	2.87609e+06	6.3041e+06	4.03113e+06	4.81642e+06	6.43199e+06	3.16169e+06	4.17828e+06	7.39023e+06	6.01537e+06	5.40267e+06	1.11136e+07	1.69119e+07	1.46776e+07	1.15157e+07	2.54264e+07	8.14675e+06	3.49006e+06	8.10006e+06	3.95204e+07	22069491	9.62528e+06	2.84435e+07	3.25958e+06	6.81145e+06	5.21655e+06	7.4837e+06	554740	0
V434	HESI(+)	627.461	4.74	4.28	M+Na	TG(18:3_12:0_4:0)	TG 34:3	1.74609e+07	4.42284e+07	4.22626e+07	3.20872e+07	2.2511e+07	6.55884e+07	6.56408e+07	8.07274e+07	1.34978e+07	8.7366e+06	1.03648e+07	7.73579e+07	4.60808e+06	0	0	5.45509e+06	0	4907.09	4.47645e+07	4.80402e+07	6.26414e+07	8.81221e+07	1.09593e+08	2.35693e+07	183436	1.31243e+08	2.62398e+08	1.19943e+08	1.55409e+08	2.89714e+07	0	0	0	178876	11867.4	0
V435	HESI(+)	627.462	3.83	3.62	M+H	TG(26:6_5:0_5:0)	TG 36:6	2.78364e+07	4.51764e+07	2.27634e+07	1.56589e+07	1.39882e+07	6.01287e+07	4.25624e+07	5.78235e+07	1.56581e+07	1.56546e+07	8.73387e+06	5.46952e+07	4.86379e+06	135532	645816	5.97051e+06	79625.2	1.43111e+06	4.2063e+07	5.32889e+07	4.8086e+07	4.59929e+07	9.39736e+07	2.52696e+07	6.73084e+06	1.00068e+08	1.20498e+08	7.85685e+07	1.0006e+08	1.53039e+07	87518.3	0	106088	5.38038e+06	119932	0
V436	HESI(+)	627.462	5.57	4.72	M+Na	TG(22:3_4:0_8:0)	TG 34:3	9.58042e+07	1.23566e+08	9.87949e+07	7.28322e+07	4.92674e+07	1.81517e+08	1.61006e+08	2.43178e+08	5.28346e+07	4.82002e+07	2.9664e+07	1.49567e+08	1.73601e+07	2.35631e+06	5.57261e+06	2.15124e+07	876826	4.03294e+06	1.21012e+08	138820662	1.33626e+08	1.45345e+08	2.40362e+08	7.30187e+07	2.82312e+07	2.74253e+08	3.76765e+08	2.13266e+08	4.02387e+08	7.30382e+07	2.54938e+06	2.9929e+06	2.89019e+06	1.959e+07	0	0
V437	HESI(+)	628.432	4	3.76	M+H	LPC(26:4)	LPC 26:4	2.33729e+07	25810494	2.98284e+07	2.50967e+07	2.51496e+07	3.24776e+07	2.64047e+07	2.72021e+07	1.81727e+07	1.8468e+07	2.61839e+07	2.62708e+07	1.08057e+07	9.98409e+06	1.09259e+07	1.02523e+07	9.68704e+06	9.93959e+06	1.95108e+07	2.76771e+07	1.97894e+07	2.03917e+07	3.15734e+07	1.44806e+07	8.63983e+06	3.99258e+07	4.58167e+07	3.49164e+07	6.27332e+07	4.40201e+07	6.67393e+06	1.03625e+07	7.16026e+06	7.76317e+06	7.1353e+06	5.75798e+06
V438	HESI(+)	628.566	9.71	7.89	M+H	Cer(d18:1_23:4)	Cer 41:5	8.34825e+07	9.20157e+07	1.03203e+08	1.19273e+08	1.72046e+08	7.51707e+07	4.6207e+07	2.59752e+07	2.95439e+07	2.75584e+07	4.48871e+07	3.56064e+07	8.13104e+06	8.13772e+06	1.08371e+07	7.45133e+06	5.79426e+06	1.56537e+07	2.69522e+07	3.74282e+07	3.14514e+07	2.87911e+07	3.97048e+07	1.69005e+07	7.98227e+07	3.03587e+07	3.4874e+07	3.3467e+07	5.21886e+07	4.43126e+07	8.01399e+06	7.73937e+06	1.00714e+07	1.50428e+07	2.1229e+07	8.10775e+06
V439	HESI(+)	628.603	10.45	9.11	M+H-H2O	Cer(d18:2_24:1)	Cer 42:3	2.73109e+07	2.1412e+07	2.28601e+07	2.68083e+07	1.92844e+07	1.32026e+07	5.37335e+07	3.59751e+07	3.61077e+07	4.19522e+07	5.98166e+07	5.23871e+07	6.31662e+07	8.04003e+07	5.10975e+07	7.50059e+07	1.48461e+07	6.14136e+07	1.53034e+07	1.34255e+07	1.64479e+07	1.49387e+07	1.69638e+07	1.52287e+07	1.0512e+08	2.98514e+07	2.02382e+07	1.80235e+07	1.51191e+07	2.28893e+07	6.21065e+07	7.70625e+07	1.49056e+07	5.48141e+07	5.82081e+07	2.98505e+07
V440	HESI(+)	629.506	2.35	2.21	M+Na	DG(17:0_18:2)	DG 35:2	1.06914e+07	1.98556e+06	3.99844e+06	6.52597e+06	51241.4	5.32663e+06	1.50755e+06	3.38463e+06	6.64011e+06	4.73656e+06	4.00181e+06	2.88478e+06	3.61467e+06	4.09099e+06	1854782	4.13825e+06	5.72452e+06	2.62712e+06	1.04455e+07	4.35981e+06	2.03785e+07	2.51296e+07	1.19211e+07	1.48592e+07	2.01047e+07	5.08461e+06	2.94446e+07	3.3449e+07	2.20263e+07	2.38187e+07	5.22809e+06	8.16739e+06	2.37632e+07	1.8286e+07	1.77972e+07	1.31587e+07
V441	HESI(+)	629.513	9.61	7.72	M+H	DG(18:1_19:4)	DG 37:5	233756003	2.17831e+08	2.99467e+08	3.38324e+08	4.64196e+08	1.86615e+08	1.67201e+08	104991894	2.66397e+08	2.19296e+08	3.11653e+08	2.32685e+08	2.09024e+08	1.44844e+08	2.37309e+08	2.41242e+08	3.51636e+08	2.84478e+08	4.50172e+08	3.09165e+08	3.08535e+08	3.53246e+08	4.97438e+08	4.7116e+08	2.80949e+08	2.79354e+08	2.26251e+08	2.33901e+08	2.54884e+08	1.50675e+08	4.00675e+08	3.37941e+08	3.43124e+08	6.3621e+08	3.07723e+08	2.37672e+08
V442	HESI(+)	629.55	10.66	9.43	M+H	DG(O-15:1_23:4)	DG O-38:5	7.73381e+07	1.07456e+08	1.43209e+08	1.71547e+08	1.12547e+08	6.88791e+07	2.72006e+07	4.67854e+07	4.31238e+07	4.1977e+07	3.97523e+07	4.7323e+07	1.78815e+07	1.90882e+07	2.45248e+07	2.04369e+07	5.47476e+06	2.47419e+07	7.39359e+07	6.65916e+07	8.86883e+07	7.3615e+07	1.20984e+08	1.67372e+08	8.70752e+07	2.33791e+07	1.61262e+07	1.60678e+07	1.63171e+07	2.79135e+08	5.70593e+06	5.22223e+06	5.42948e+06	5.71879e+06	7.52717e+06	1.02599e+07
V443	HESI(+)	630.375	2.29	2.14	M+NH4	PG(O-6:0_20:6)	PG O-26:6	3.16706e+07	4.40365e+07	1.81066e+07	15653884	2.53185e+07	3.47908e+07	69869482	9.61289e+07	4.17023e+07	3.94932e+07	7.10541e+06	7.71025e+07	2.21346e+07	2.69397e+07	1.66102e+07	2.30575e+07	3.08487e+07	2.74584e+07	3.34165e+07	7.07305e+07	6.19935e+07	3.98385e+07	5.77568e+07	4.5868e+07	4.7525e+07	8.62258e+07	1.15908e+08	8.04309e+07	2.14263e+08	4.44391e+07	3.22833e+07	9.50703e+06	2.68496e+07	2.31738e+07	2.30916e+07	3.31052e+07
V444	HESI(+)	630.446	5.19	4.53	M+Na	LPC(24:0)	LPC 24:0	7.37349e+07	1.28043e+08	6.8297e+07	6.76924e+07	6.30948e+07	1.26262e+08	4.89378e+07	3.24569e+07	5.19064e+07	5.86968e+07	4.24348e+07	3.1424e+07	2.4986e+07	1.85419e+07	2.00518e+07	2.46559e+07	1.3668e+07	1.68259e+07	1.84574e+07	2.61794e+07	2.59001e+07	2.15989e+07	2.60258e+07	6.28901e+07	3.26565e+07	1.02339e+08	4.27455e+07	1.50918e+07	4.73426e+07	1.34841e+08	1.04977e+07	1.29882e+07	1.86932e+07	3.46252e+07	2.38186e+07	9.89964e+06
V445	HESI(+)	630.507	8.02	5.97	M+NH4	TG(O-11:0_22:6_3:0)	TG O-36:6	44001.5	0	170234	250744	141699	175636	0	31992.7	167977	188088	43354.6	218662	4.27836e+06	1.59892e+06	5.94693e+06	7.55372e+06	1.17755e+07	4.89638e+06	2.00904e+06	62821	872585	252544	625330	706925	701603	1.80249e+06	929841	333926	619126	284476	5.87382e+06	6.99725e+06	7.13193e+06	2.46608e+07	5.0981e+06	5.32619e+06
V446	HESI(+)	630.51	7.93	5.91	M+NH4	DG(14:0_22:6)	DG 36:6	2.452e+06	5.51906e+06	7.57318e+06	9.43114e+06	8.72142e+06	1.12877e+07	4.80886e+06	2.55489e+06	4.79654e+06	7.0918e+06	5.85247e+06	4.42842e+06	5.49749e+07	3.4941e+07	6.84265e+07	114163526	1.81976e+08	6.47461e+07	2.28576e+07	1.31418e+07	3.26403e+07	1.94105e+07	2.83155e+07	2.43347e+07	1.98107e+07	3.19636e+07	1.8951e+07	1.69818e+07	1.69071e+07	1.68407e+07	1.71108e+08	1.76096e+08	1.56619e+08	3.53882e+08	7.09394e+07	4.38133e+07
V447	HESI(+)	630.581	10.47	9.14	M+H	Cer(d18:2_23:2)	Cer 41:4	6.08622e+08	5.6487e+08	1.6322e+08	1.57831e+08	3.60069e+08	4.27625e+08	2.69394e+07	3.97909e+07	5.67409e+07	3.30009e+07	3.54553e+07	5.63727e+07	2.60172e+07	3.05993e+07	2.51778e+07	2.7032e+07	1.95577e+07	2.57886e+07	6.85945e+07	5.75235e+07	8.34243e+07	6.95557e+07	7.71819e+07	8.4779e+07	2.851e+08	2.68973e+07	2.46345e+07	3.77686e+07	3.29443e+07	3.58288e+07	1.73935e+07	1.30175e+07	1.87879e+07	2.90082e+07	3.23367e+07	1.1264e+07
V448	HESI(+)	630.618	10.96	9.87	M+NH4	WE(O-18:0_26:4)	WE O-42:4	9.30209e+08	9.9027e+08	6.49794e+08	7.24318e+08	8.78685e+08	6.7283e+08	2.34441e+08	1.78175e+08	1.91981e+08	2.0334e+08	2.29817e+08	1.78028e+08	131769008	4.4516e+08	1.36311e+08	154542637	100615588	1.83109e+08	4.3364e+08	3.91678e+08	4.55407e+08	3.45572e+08	5.36684e+08	4.5566e+08	6.75604e+08	1.54482e+08	9.47625e+07	1.62614e+08	3.16857e+08	2.48163e+08	1.3291e+08	1.59024e+08	1.28702e+08	1.19076e+08	1.78128e+08	1.19773e+08
V449	HESI(+)	631.507	5.68	4.77	M+Na	DG(17:0_18:1)	DG 35:1	3.76642e+07	4.60463e+07	6.86311e+07	4.86769e+07	3.81064e+07	5.31182e+07	3.29638e+07	4.03671e+07	1.69099e+07	1.7118e+07	1.50868e+07	4.59611e+07	2.90615e+06	525248	242378	5.22706e+06	1.66067e+06	1.53003e+06	5.66295e+07	7.08798e+07	6.89773e+07	6.59269e+07	7.20594e+07	3.12986e+07	3.07104e+07	5.25046e+07	8.35878e+07	5.52922e+07	9.67361e+07	4.56189e+07	3855.83	440157	500002	1.05128e+07	250251	0
V450	HESI(+)	632.51	5.53	4.7	M+H	NAGly(19:1_18:2)	NAGly 37:3	1.7795e+06	1.27128e+06	3.92238e+06	1.66759e+07	1.67958e+06	1.71215e+07	6.59644e+06	1.89161e+06	4.48524e+06	4.47176e+06	4.46835e+06	1.92306e+07	0	0	0	38009.2	0	0	2.64917e+07	3.34055e+06	2.16413e+07	2.02621e+07	2.57762e+07	7.24934e+06	467343	1.59079e+07	3.00435e+06	1.68203e+07	3.47947e+07	1.65075e+07	0	0	0	2.97036e+06	0	0
V451	HESI(+)	632.524	8.1	6.04	M+Na	DG(18:2_18:3)	DG 36:5	6.517e+06	5.48825e+06	7.23673e+06	3.85116e+06	1.41224e+07	9.23842e+06	2.0057e+06	1.67161e+06	6.74798e+06	6.89218e+06	8.01351e+06	3.58217e+06	3.23157e+06	5.78667e+06	7.86318e+06	9.09951e+06	1.00416e+07	2.10447e+06	3.49952e+07	9.10796e+06	3.60643e+07	2.01122e+07	5.56724e+07	3.23981e+07	1.22793e+07	2.94844e+06	1.73742e+06	3.29524e+06	2.51616e+06	551419	4.1781e+06	2.84042e+06	2.41486e+06	9.96719e+06	37932.4	0
V452	HESI(+)	632.527	8.39	6.27	M+NH4	TG(O-11:0_5:0_20:5)	TG O-36:5	2.6116e+07	2.75211e+07	2.39918e+07	3.74383e+07	3.57606e+07	1.84968e+07	3.41898e+07	1.12781e+07	24687912	3.29391e+07	3.00167e+07	1.77703e+07	2.09327e+07	1.05501e+07	2.70452e+07	4.4244e+07	5.23108e+07	1.83502e+07	3.69961e+07	2.53874e+07	5.22231e+07	3.65667e+07	4.76455e+07	4.00862e+07	3.41751e+07	4.58389e+07	2.53408e+07	1.93545e+07	3.17158e+07	2.45581e+07	4.77423e+07	4.20285e+07	4.29875e+07	7.0119e+07	2.31123e+07	9.46032e+06
V453	HESI(+)	633.429	5.01	4.44	M+Na	DG(16:2_20:5)	DG 36:7	21125.7	143149	932143	795397	1.91462e+06	8.51963e+06	123530	1.17652e+06	0	570258	606241	1.38427e+06	158413	159368	1471.77	0	0	0	0	2.33448e+06	2.1412e+06	2.02407e+06	1.93342e+06	774805	1.58196e+06	5.57918e+06	5.39497e+06	4.34921e+06	3.20612e+06	11875.2	1.68205e+06	1.19112e+06	2.30936e+06	955237	991030	5.58351e+06
V454	HESI(+)	633.486	9.83	8.07	M+H	DG(P-16:3_23:6)	DG O-39:10	1.05345e+08	1.13339e+08	2.00522e+08	1.89913e+08	1.68515e+08	1.14083e+08	1.18357e+08	7.04502e+07	1.68595e+08	1.6203e+08	1.81168e+08	1.64967e+08	2.53785e+08	1.57244e+08	2.48691e+08	2.5597e+08	3.15719e+08	2.96161e+08	2.16624e+08	1.61984e+08	1.65434e+08	1.50221e+08	1.70114e+08	1.79643e+08	1.84491e+08	176239817	1.43621e+08	1.88196e+08	158064454	1.6895e+08	2.7536e+08	251160734	2.73339e+08	2.93325e+08	278206483	281164809
V455	HESI(+)	634.539	8.98	6.88	M+Na	DG(16:0_20:4)	DG 36:4	2.77351e+07	2.9891e+07	2.62579e+07	3.13533e+07	3.68828e+07	2.6624e+07	3.76815e+07	2.32534e+07	3.58625e+07	3.76766e+07	4.12581e+07	3.54326e+07	4.37891e+07	3.9439e+07	5.80096e+07	6.65979e+07	9.05359e+07	3.87608e+07	7.46766e+07	7.65147e+07	5.97468e+07	4.35532e+07	9.16461e+07	8.6692e+07	5.20676e+07	5.01798e+07	4.93656e+07	3.28822e+07	5.65352e+07	2.6953e+07	86797608	7.85219e+07	9.46891e+07	8.79036e+07	4.04792e+07	4.26029e+07
V456	HESI(+)	634.539	9.17	7.11	M+NH4	TG(P-12:1_6:0_18:2)	TG O-36:4	1.12122e+08	1.31345e+08	1.55444e+08	1.84584e+08	1.88802e+08	152879470	1.84888e+08	1.57292e+08	142434547	1.61261e+08	199439157	1.44728e+08	3.06794e+08	1.48653e+08	1.99447e+08	2.49605e+08	3.00408e+08	1.62685e+08	1.89443e+08	1.39769e+08	176866522	1.62248e+08	2.69917e+08	180901674	9.19243e+07	2.72224e+08	1.55399e+08	1.96295e+08	1.72002e+08	1.1558e+08	3.92226e+08	1.82694e+08	3.65788e+08	3.87448e+08	1.38962e+08	1.71261e+08
V457	HESI(+)	634.539	8.76	6.64	M+NH4	TG(P-13:1_5:0_18:2)	TG O-36:4	1.07536e+08	1.10601e+08	9.00883e+07	6.98337e+07	2.39012e+08	1.10554e+08	1.96588e+08	8.14627e+07	1.31654e+08	201122157	2.09408e+08	8.17713e+07	1.20522e+08	1.53806e+08	1.35432e+08	2.46945e+08	1.82158e+08	1.07853e+08	3.32258e+08	2.88588e+08	2.96635e+08	1.41904e+08	4.36468e+08	5.3326e+08	1.70724e+08	1.2409e+08	1.41547e+08	1.11046e+08	8.08953e+07	5.2349e+07	1.36864e+08	8.6025e+07	9.02613e+07	2.54493e+08	9.62344e+07	3.00144e+07
V458	HESI(+)	634.542	9.1	7.03	M+NH4	DG(18:2_18:2)	DG 36:4	8.14956e+08	971942132	9.34418e+08	1201808535	1057614534	9.05238e+08	1361062881	1049753146	8.71573e+08	1431922993	1210018320	1078438782	2275168925	1145342999	1623000105	2685327969	2831266083	1091273866	1384996366	1423322539	1371870217	1157286651	2055503689	1746362536	774636224	1904662010	1660910889	1353644667	1278240864	9.26134e+08	3321999618	2121939361	3471782807	3008595480	1425311807	1037655053
V459	HESI(+)	634.542	8.69	6.56	M+NH4	TG(O-15:2_3:0_18:2)	TG O-36:4	9.10876e+08	1101620479	7.78051e+08	7.7847e+08	1844015510	9.67255e+08	1397673694	1187804622	1425602570	2091100175	1951220760	7.81905e+08	8.61856e+08	1718993070	1001756665	1981261410	2044069068	6.36052e+08	3059262004	3622196080	2882957742	2182902305	6717551084	6330855361	2050799002	1622081980	1925572404	1132430986	1401454585	6.20841e+08	1425958215	9.99332e+08	1129481053	1706658917	6.37235e+08	2.70183e+08
V460	HESI(+)	634.614	10.6	9.34	M+H	Cer(d18:2_23:0)	Cer 41:2	5.42076e+08	586437663	4.35157e+08	5.78443e+08	6.7881e+08	3.79292e+08	1.12013e+08	1.23636e+08	1.55987e+08	1.64216e+08	1.28107e+08	1.24895e+08	4.82193e+07	6.25075e+07	6.21381e+07	4.68867e+07	2.84829e+07	6.43679e+07	327528191	3.37382e+08	4.00923e+08	3.35394e+08	4.21482e+08	3.07171e+08	2.31357e+08	1.1277e+08	6.07383e+07	1.14092e+08	1.04701e+08	131443867	6.64459e+07	4.145e+07	3.50795e+07	7.55637e+07	6.4421e+07	2.10363e+07
V461	HESI(+)	634.614	10.45	9.1	M+H	Cer(d18:1_23:1)	Cer 41:2	651892296	5.25972e+08	4.6119e+08	6.22591e+08	4.70397e+08	2.88937e+08	6.86499e+08	357984486	4.3118e+08	4.94016e+08	6.44128e+08	3.76648e+08	3.28918e+08	3.54171e+08	3.11932e+08	3.66537e+08	1.83674e+08	314512197	1.96309e+08	2.34844e+08	2.92922e+08	2.19749e+08	2.50994e+08	248050644	6.66933e+08	3.4086e+08	2.29616e+08	1.69136e+08	1.93063e+08	1.99224e+08	2.74256e+08	2.35537e+08	2.32996e+08	5.16252e+08	3.95068e+08	1.54559e+08
V462	HESI(+)	634.652	11.32	10.33	M+H	Cer(m18:0_24:1)	Cer O-42:1	4.80301e+07	3.28111e+07	7.38708e+07	1.00679e+08	4.71341e+07	3.05319e+07	1.09563e+08	8.63265e+07	1.3814e+08	119729499	190478937	1.29819e+08	2.0617e+08	1.45703e+08	2.70084e+08	2.06869e+08	299518048	2.6152e+08	9.15302e+07	9.94736e+07	9.01192e+07	1.3519e+08	105728679	7.70247e+07	6.27274e+07	1.45879e+08	1.61455e+08	1.23157e+08	108630706	1.4503e+08	2.96494e+08	2.59162e+08	514949534	2.69637e+08	2.79624e+08	5.42984e+07
V463	HESI(+)	635.461	5.69	4.78	M+Na	TG(P-15:2_5:0_16:3)	TG O-36:6	1.07565e+07	1.50769e+07	1.1305e+07	1.16802e+07	1.52216e+07	1.01962e+07	5.40599e+06	8.67453e+06	2.81799e+06	7.41697e+06	2.55865e+06	1.18098e+07	5.45819e+06	2.27714e+06	5.05351e+06	2.0523e+07	5.21793e+06	4.7638e+06	7.88081e+06	1.26673e+07	3.76492e+06	1.12033e+07	1.13292e+07	1.47759e+07	3.88329e+06	1.08249e+07	1.44915e+07	2.52784e+06	2.03827e+07	6.34286e+06	3.6478e+06	5.3117e+06	1.20796e+07	1.13832e+07	9.77716e+06	4.13089e+06
V464	HESI(+)	635.501	4.83	4.33	M+Na	DG(P-16:3_21:2)	DG O-37:6	2.9233e+06	5.91745e+06	5.81147e+06	3.35317e+06	7.78874e+06	1.30432e+07	2.13756e+07	1.84008e+07	8.43557e+06	6.12224e+06	3.56313e+06	3.79265e+07	2.5991e+06	0	615318	2.62353e+06	0	616736	6.22206e+06	1.55018e+07	5.61389e+06	2.47092e+06	1.62972e+07	6.09663e+06	896636	3.33392e+07	4.31727e+07	2.03732e+07	52178303	6.46425e+06	0	0	0	110077	0	0
V465	HESI(+)	636.556	9.68	7.83	M+NH4	DG(18:1_18:2)	DG 36:3	7.61709e+07	2.48171e+08	2.65353e+08	4.06142e+08	377537329	1.75984e+08	3.66156e+08	2.45508e+08	188832550	2.07046e+08	6.24948e+08	3.64328e+08	1.85216e+08	1.4624e+08	2.04724e+08	7.23113e+08	3.67094e+08	5.92712e+08	2.40134e+08	2.20729e+08	1.79082e+08	1.45814e+08	2.64131e+08	2.83282e+08	4.15792e+08	5.7581e+08	1.71411e+08	5.05552e+08	1.85408e+08	2.23575e+08	9.06978e+08	3.26368e+08	6.60999e+08	4.17204e+08	6.27722e+08	7.22799e+08
V466	HESI(+)	636.556	9.35	7.35	M+NH4	TG(O-11:0_5:0_20:3)	TG O-36:3	3549437715	4362018165	6549830357	8522933812	10362164811	3388851066	16232550845	9935625738	17655375692	18003027154	18768818651	13587857322	16713228972	16790906823	17921048624	21794380421	26645991508	15058099414	18485069708	21142485155	17200901590	15138087764	22176368255	23804049318	17229014855	17219879293	18567914926	15451537673	17969719367	4177682461	24740758962	24595380971	20572780988	26864168260	15601032712	15670995554
V467	HESI(+)	636.629	10.65	9.41	M+H	Cer(d18:1/23:0)	Cer 41:1	1.30658e+07	1.16068e+07	3.21829e+07	3.86378e+07	4.95843e+07	8.35696e+06	1.18108e+07	1.08476e+07	1.6768e+07	1.61988e+07	1.32128e+07	1.13158e+07	5.84563e+06	5.70982e+06	7.97014e+06	4.46077e+06	2.85853e+06	7.24047e+06	2.67712e+07	2.4614e+07	2.52811e+07	2.54141e+07	8.41411e+06	2.37048e+07	2.03169e+07	1.12166e+07	1.30586e+07	1.15324e+07	1.03893e+07	1.16583e+07	1.1651e+07	7.44767e+06	7.53727e+06	7.71097e+06	1.25134e+07	2.09514e+07
V468	HESI(+)	636.631	11.15	10.12	M+H	Cer(d18:1_23:0)	Cer 41:1	4.5483e+08	3.99832e+08	1.56873e+08	1.94032e+08	2.73256e+08	2.40311e+08	2.56257e+07	6.71126e+07	106864560	4.48594e+07	4.79163e+07	8.62356e+07	5.24798e+07	5.2227e+07	5.11186e+07	5.47313e+07	3.4218e+07	5.68872e+07	1.09002e+08	1.3859e+08	1.22398e+08	1.11524e+08	1.01155e+08	1.46857e+08	1.44618e+08	4.64717e+07	43099041	5.91068e+07	4.78373e+07	8.20535e+07	5.39108e+07	2.49749e+07	4.4218e+07	8.43872e+07	6.53617e+07	1.73914e+07
V469	HESI(+)	637.47	3.34	3.19	M+H	MePC(24:0)	MePC 24:0	2.92226e+06	1.05494e+06	2.8298e+06	2.84096e+06	1.41046e+06	2.9403e+06	810852	1.62322e+06	3.9249e+06	1.70606e+06	1.1543e+06	750594	2.55494e+06	3.61922e+06	1.87808e+06	1.70702e+06	1.54128e+06	3.57906e+06	2.3124e+06	3.24337e+06	2.99574e+06	1.01513e+06	7.51353e+06	1.70559e+06	2.32411e+06	1.27953e+06	977890	2.89073e+06	1.74202e+06	1.58753e+06	2.32772e+06	1.40516e+06	1.16978e+06	2.44085e+06	2.73026e+06	2.48712e+06
V470	HESI(+)	638.33	1.28	1.08	M+NH4	LPI(20:4)	LPI 20:4	9.89017e+06	8.73819e+06	4.28796e+07	1.31696e+07	1.37301e+07	1.01117e+07	3.41823e+07	1.9799e+07	1.56811e+07	2.00501e+07	2.7859e+07	1.9535e+07	2.20803e+07	2.6394e+07	3.22351e+07	2.08784e+07	9.24847e+06	2.47299e+07	1.9579e+07	3.21852e+07	2.65196e+07	1.17378e+07	2.25999e+07	1.94722e+07	2.2198e+07	3.04052e+07	23707173	1.73966e+07	3.03025e+07	1.12376e+07	2.59255e+07	2.79794e+07	2.04447e+07	2.37812e+07	2.77729e+07	1.92225e+07
V471	HESI(+)	638.571	9.98	8.32	M+NH4	DG(18:1_18:1)	DG 36:2	3698260068	3924891770	4865047631	6211464901	5977764042	2473090741	11119256614	5419912053	12124428690	10091048224	14001102567	9611987421	12459746014	13544471733	18732518685	16715820961	22696645016	15469205832	10164002239	11308268553	7530801053	6353400721	9180938454	8609926158	11709004975	15998245801	9891867590	9200536268	10243737944	3755818093	37321986400	30617287837	21702125309	26022332619	17316162138	23678786783
V472	HESI(+)	638.571	10.44	9.08	M+NH4	TG(O-13:1_5:0_18:1)	TG O-36:2	1.32097e+08	1.30386e+08	1.39945e+08	2.26549e+08	2.03505e+08	1.08439e+08	3.33693e+08	183659136	4.2093e+08	3.80509e+08	5.04114e+08	3.86654e+08	3.61551e+08	2.85641e+08	4.32902e+08	4.61042e+08	1.30563e+08	3.7195e+08	4.20834e+08	3.92047e+08	2.82214e+08	2.23177e+08	2.86922e+08	3.41476e+08	3.40502e+08	4.3574e+08	2.98885e+08	3.20043e+08	3.66837e+08	9.81309e+07	6.39823e+08	1.64749e+08	1.13555e+08	7.21327e+08	1.00608e+08	171875639
V473	HESI(+)	638.572	10.04	8.42	M+NH4	DG(18:0_18:2)	DG 36:2	5.94782e+08	3671814456	964930715	933039503	1001595844	6.2358e+08	1297367452	7.79939e+08	1386302143	1887806386	1798402220	1869325916	1563429216	1384117620	2915151804	2967981186	2542697533	2239340106	2678427754	2335990533	7014115088	922827539	8513035677	8023536673	1213198599	2221883734	1173689481	1435034740	1359632763	7.922e+08	4333923420	4949208183	2518080374	4612150393	2455572598	4706336235
V474	HESI(+)	639.498	8.9	6.79	M+H	TG(P-4:0_20:6_14:0)	TG O-38:7	148257358	1.72867e+08	103880465	111214588	1.84589e+08	1.43145e+08	118938475	6.90248e+07	1.22261e+08	1.41909e+08	1.50224e+08	7.70348e+07	1.40119e+08	1.01352e+08	1.55527e+08	2.13447e+08	2.88456e+08	9.75164e+07	4.6025e+08	4.12282e+08	2.8416e+08	2.21157e+08	3.85936e+08	4.83651e+08	2.97256e+08	1.17671e+08	1.34392e+08	9.75805e+07	1.63606e+08	8.23768e+07	2.03214e+08	1.3367e+08	1.01798e+08	187463293	1.31906e+08	9.90098e+07
V475	HESI(+)	639.498	9.1	7.02	M+Na	DG(18:2_18:2)	DG 36:4	4.0534e+08	5.32766e+08	5.50693e+08	5.87155e+08	7.93014e+08	6.24452e+08	4.86107e+08	3.04035e+08	3.60683e+08	7.23041e+08	6.40357e+08	4.3807e+08	1556975536	6.51897e+08	1028012108	1809896041	1794934842	6.07232e+08	8.94503e+08	7.49192e+08	7.39408e+08	5.85279e+08	1274312790	1432261094	380024260	6.02767e+08	5.57551e+08	5.88201e+08	5.54624e+08	4.1675e+08	1323291374	7.45946e+08	1678400242	1596093410	7.95582e+08	4.88255e+08
V476	HESI(+)	639.498	8.11	6.04	M+H	DG(18:2_20:5)	DG 38:7	0	3.58068e+06	1.45515e+06	1.3166e+06	1.3554e+07	1.40161e+06	1.79448e+06	0	1.30344e+06	1.91342e+06	5.4905e+06	0	2.15312e+07	8.81489e+06	1.48547e+07	2.70249e+07	3.06714e+07	1.01277e+07	6.20993e+06	2.67541e+06	1.01489e+07	3.68537e+06	6.62854e+06	4.26378e+06	7.3715e+06	1.84357e+06	0	0	3.3559e+06	1.72404e+06	1.9038e+07	2.39267e+07	2.83251e+07	4.8366e+07	1.72042e+07	5.78861e+06
V477	HESI(+)	640.588	10.56	9.28	M+NH4	DG(18:0_18:1)	DG 36:1	5.14207e+08	5.2786e+08	6.1384e+08	8.17974e+08	7.49812e+08	3.28556e+08	8.85483e+08	7.05151e+08	1102862962	955589480	1398921921	1113422886	1006643779	1043145351	1273451343	1395865463	2046900306	1397340215	1418162922	1574712743	8.17397e+08	6.82357e+08	1173597825	1044728629	1303233755	1214654242	7.4334e+08	1249662161	9.69575e+08	5.64579e+08	2828227488	2749015554	1125131865	2471235782	1144389912	2089385177
V478	HESI(+)	641.477	5.56	4.72	M+Na	TG(24:3_4:0_7:0)	TG 35:3	4.60193e+07	7.1185e+07	1.14657e+08	7.91554e+07	4.6663e+07	9.3149e+07	8.73982e+07	6.06605e+07	9.25497e+06	1.52085e+07	9.42265e+06	1.33707e+08	6.35698e+06	41584.8	0	1.07411e+07	0	7588.56	9.24355e+07	1.30066e+08	1.0835e+08	9.89829e+07	1.83221e+08	2.55664e+07	1.81792e+07	1.71405e+08	2.3986e+08	1.50145e+08	2.507e+08	1.81931e+08	1.04957e+06	2018.94	599503	8.16487e+06	0	0
V479	HESI(+)	641.512	9.64	7.78	M+Na	DG(18:1_18:2)	DG 36:3	3.42948e+08	3.86907e+08	7.023e+07	1.76687e+08	2.37523e+08	1.09379e+08	575453142	1.46369e+08	2.98816e+08	3.22394e+08	902547334	241339985	8.35391e+08	2.19064e+08	8.58919e+08	1165070020	1473914476	1006654491	3.69397e+08	2.77695e+08	252839364	2.28445e+08	337297523	4.27914e+08	6.54341e+08	2.64559e+08	211948218	2.75201e+08	2.41414e+08	3.34423e+08	1295181964	1217114436	6.51997e+08	1720966192	1068605827	1214119797
V480	HESI(+)	641.512	9.35	7.35	M+Na	TG(O-11:0_5:0_20:3)	TG O-36:3	2579325845	3393722764	5843550452	6861972373	8088343008	3122849188	9264040975	8114855819	13227190598	14898453264	15028663486	10781510962	13392854129	12834401532	14750976436	17694372531	20944238907	11627836076	17539010500	15845505418	13560190625	11750172980	17434138431	20226459295	10275803234	13616600279	12609255535	12829247194	12590896964	4266693409	15435654220	16019188404	15846666513	18859212068	12751191356	11899075955
V481	HESI(+)	641.516	8.85	6.73	M+H	DG(16:0_22:6)	DG 38:6	9.67564e+07	105621917	9.63501e+07	1.21283e+08	8.02032e+07	100861617	7.65986e+07	6.94009e+07	5.52182e+07	6.99475e+07	9.45538e+07	1.06152e+08	1181733475	6.54674e+08	1213163595	1641549317	1510370205	1071227140	118750059	1.45857e+08	1.68047e+08	1.35361e+08	2.79881e+08	1.99305e+08	1.09616e+08	2.34056e+08	1.58978e+08	1.82634e+08	1.32355e+08	137552158	2243457033	1655048468	1867832447	2029938672	9.62219e+08	6.79118e+08
V482	HESI(+)	642.391	2.1	1.94	M+Na	LPC(P-27:7)	LPC O-27:8	2.56621e+08	4.23028e+08	5.12194e+08	4.45192e+08	9.7728e+08	5.66485e+08	4.62309e+08	5.26081e+08	2266860662	8.13222e+08	5.90282e+08	8.36605e+08	1.18998e+06	92809.5	466520	3.12976e+06	964528	728300	774992877	1108129022	8.88574e+08	1.77804e+08	1157365601	2200597531	1315675769	1226231367	1051430727	2402028190	1926081422	1324710183	324457	71447.1	187625	7.09207e+06	743538	794893
V483	HESI(+)	642.58	10.07	8.48	M+H	Cer(d18:1/24:4)	Cer 42:5	1217930173	1434174779	1356208564	1652967466	1898035169	9.44619e+08	1776350770	8.66448e+08	1055175701	1125543814	1581522587	9.24188e+08	8.21808e+08	9.06259e+08	9.2695e+08	7.20737e+08	6.71948e+08	1087333485	3.45895e+08	3.35261e+08	342198790	3.26901e+08	312433591	3.56492e+08	1616067935	8.54726e+08	8.84418e+08	7.89614e+08	6.23769e+08	1069539865	7.61161e+08	9.49801e+08	1066778781	7.68025e+08	1611398868	1463696338
V484	HESI(+)	642.581	10.13	8.58	M+H	Cer(d19:1_23:4)	Cer 42:5	1.58061e+08	1.92992e+08	248222578	2.5255e+08	2.34196e+08	1.51791e+08	2.6806e+08	1.68035e+08	1.44172e+08	2.0478e+08	2.32752e+08	2.00667e+08	1.22271e+08	1.13173e+08	1.61989e+08	1.40162e+08	7.3757e+07	1.77237e+08	8.84234e+07	7.7697e+07	3.17348e+08	5.96214e+07	5.39949e+07	5.23636e+07	2.16573e+08	1.53003e+08	1.67012e+08	1.18485e+08	9.08371e+07	2.3297e+08	1.01282e+08	105674240	1.28837e+08	1.38591e+08	2.57831e+08	3.07205e+08
V485	HESI(+)	643.527	9.99	8.33	M+Na	DG(18:1_18:1)	DG 36:2	4736865808	4974044224	6677583626	7823508071	7487616800	3790265210	9410007313	6117601443	11812938374	10958450761	13520824176	10904842302	14364634821	12761604077	17513891208	16725577798	20808579524	16622016700	11833778636	11527865746	8586872059	8130612949	10392643144	11278405396	9043487705	12095086539	10623105431	10712956414	10675060852	5085947043	20810889181	19962063321	19145024700	21140632401	18620580443	20119273647
V486	HESI(+)	643.528	10.42	9.06	M+Na	TG(O-13:1_5:0_18:1)	TG O-36:2	2.42329e+08	2.5493e+08	3.71188e+08	4.68794e+08	4.18738e+08	2.307e+08	5.87218e+08	3.4795e+08	7.52907e+08	7.90185e+08	1049638433	8.06013e+08	6.34293e+08	4.56713e+08	2.44632e+08	6.84553e+08	2.67979e+08	2.24206e+08	8.97428e+08	647727192	5.29422e+08	4.35012e+08	5.87804e+08	6.89038e+08	5.47939e+08	6.69209e+08	5.3507e+08	6.29773e+08	6.83798e+08	1.61611e+08	386642070	3.08493e+08	2.39291e+08	959691082	2.08572e+08	3.60124e+08
V487	HESI(+)	643.528	10.47	9.14	M+H	TG(O-16:1_2:0_20:4)	TG O-38:5	9.11807e+07	3.563e+08	4.96708e+08	1.3279e+08	1.37711e+08	3.32338e+08	7.84894e+08	4.67552e+08	2.72381e+08	1095135865	4.17469e+08	1118980643	8.43065e+08	6.07265e+08	2.66737e+08	9.20793e+08	3.02942e+08	2.578e+08	1258329027	1.98788e+08	1.88501e+08	1.39192e+08	2.24697e+08	2.71827e+08	2.15175e+08	2.20054e+08	193369377	1.99105e+08	9.1311e+08	5.57895e+07	4.59369e+08	3.50893e+08	2.6721e+08	1405784395	2.30662e+08	4.19948e+08
V488	HESI(+)	643.528	10.27	8.81	M+H	DG(18:0_20:5)	DG 38:5	7.44464e+07	7.7103e+07	6.26892e+07	1.38367e+08	1.11937e+08	5.17832e+07	2.01188e+08	1.18306e+08	3.11723e+08	316100987	3.89988e+08	231361041	5.47282e+08	3.59389e+08	1262426565	6.49717e+08	1696596032	1258333056	2.02455e+08	1.25997e+08	1.54273e+08	8.59087e+07	1.37569e+08	2.01973e+08	1.52696e+08	2.36707e+08	1.79544e+08	1.31013e+08	1.82474e+08	6.55561e+07	2027306026	1722592722	1421395380	1027325801	1149788998	2087930136
V489	HESI(+)	644.562	9.55	7.64	M+H	Cer(d18:2/24:2)	Cer 42:4	5.05203e+07	5.86713e+07	7.20432e+07	1.01103e+08	8.45398e+07	3.20087e+07	1.63432e+08	2.61554e+08	2.23485e+08	229867717	2.11013e+08	1.73999e+08	5.20025e+07	9.32296e+07	8.046e+07	6.56066e+07	5.40366e+07	6.06235e+07	3.88318e+07	5.52557e+07	4.4507e+07	35049093	9.17729e+07	6.22556e+07	9.15475e+07	1.94905e+08	1.09584e+08	5.22451e+07	1.08485e+08	8.46714e+07	4.94082e+07	9.3073e+07	4.58663e+07	7.64546e+07	3.45495e+07	2.57177e+07
V490	HESI(+)	644.597	10.81	9.66	M+H	Cer(d18:0/24:4)	Cer 42:4	1234335057	1354417556	330902390	3.1442e+08	7.38119e+08	9.53805e+08	8.40968e+07	1.53309e+08	1.83117e+08	8.97952e+07	8.79617e+07	1.64643e+08	1.16692e+08	1.62909e+08	1.52586e+08	1.53654e+08	1.72992e+08	135507764	2.21009e+08	2.08186e+08	2.4257e+08	228950218	1.74726e+08	2.46919e+08	8.35717e+08	9.23948e+07	1.03141e+08	1.59025e+08	1.31002e+08	2.17304e+08	1.10419e+08	8.60138e+07	113739067	153442644	1.60835e+08	1.21172e+08
V491	HESI(+)	644.597	9.34	7.33	M+H	Cer(d19:1_23:3)	Cer 42:4	0	0	695723	0	0	0	5.90778e+06	1.67248e+07	1.15699e+07	1.50577e+07	1.36637e+07	7.12676e+06	2.36557e+07	2.68119e+07	1.31149e+07	2.49112e+07	9.58688e+06	2.49163e+07	0	1.29789e+06	1.0961e+06	0	0	955189	1.69171e+06	1.81581e+07	3.36145e+07	1.92454e+07	1.16544e+07	4.93658e+06	3.02263e+07	2.89045e+07	3.63408e+07	2.4274e+07	3.13031e+07	1.69637e+08
V492	HESI(+)	644.601	10.28	8.83	M+H	Cer(d18:3_24:1)	Cer 42:4	6.81081e+07	2.26492e+07	3.88515e+07	3.5828e+07	6.20666e+07	5.99108e+07	5.06509e+07	3.37388e+07	4.03853e+07	3.77561e+07	4.99017e+07	3.25189e+07	1.99282e+07	3.158e+07	3.26003e+07	2.09693e+07	1.96842e+07	4.51934e+07	4.99089e+06	1.66881e+07	2.448e+07	2.01074e+07	2.03826e+07	2.10874e+07	7.68174e+07	3.42672e+07	6.40094e+07	3.62481e+07	2.21053e+07	3.34114e+07	3.99361e+07	6.00702e+07	4.27959e+07	1.84777e+07	6.17001e+07	1.74491e+08
V493	HESI(+)	644.635	11.11	10.06	M+NH4	WE(O-19:0_26:4)	WE O-43:4	3.40419e+07	2.62721e+07	3.28298e+07	4.22594e+07	3.22355e+07	1.9765e+07	1.96845e+07	2.23375e+07	3.32671e+07	2.77103e+07	2.29705e+07	2.65166e+07	1.47623e+07	1.5927e+07	1.71803e+07	1.48264e+07	9.72201e+06	1.837e+07	3.02379e+07	3.54003e+07	3.02291e+07	3.12344e+07	3.50954e+07	3.37289e+07	1.79426e+07	1.95325e+07	1.89384e+07	2.30644e+07	1.85866e+07	3.12487e+07	2.17216e+07	1.30629e+07	1.50137e+07	2.34612e+07	2.71032e+07	9.96593e+06
V494	HESI(+)	645.436	2.84	2.71	M+H	MePC(25:3)	MePC 25:3	1.59786e+07	3.54759e+07	3.33268e+07	2.79461e+07	1.59003e+07	2.45554e+07	5.52599e+07	6.26995e+07	1.48023e+07	1.53469e+07	9.15625e+06	4.726e+07	5.31696e+06	518077	1.04177e+06	6.01294e+06	166662	2.10636e+06	3.492e+07	5.53706e+07	4.53236e+07	5.27863e+07	8.80613e+07	2.59178e+07	1.1306e+07	1.08436e+08	1.24736e+08	7.21788e+07	1.52497e+08	5.94751e+07	1.85133e+06	865343	1.6323e+06	1.08014e+07	2.14821e+06	730784
V495	HESI(+)	645.542	10.86	9.73	M+NH4	DG(18:0_18:1)	DG 36:1	1.41154e+07	1.57114e+07	2.27043e+07	2.56157e+07	2.93067e+07	1.30478e+07	1.83632e+07	1.59424e+07	2.98624e+07	2.71666e+07	3.20301e+07	2.7721e+07	7.57195e+07	7.32433e+07	1.13319e+08	1.09665e+08	1.95014e+08	3.74871e+07	4.88332e+07	4.25337e+07	2.89481e+07	2.34287e+07	3.51762e+07	4.13004e+07	3.71365e+07	2.53317e+07	2.08295e+07	3.41487e+07	2.59744e+07	1.1109e+07	1.99168e+08	7.30862e+07	7.19492e+07	1.81235e+08	8.16989e+07	1.37729e+08
V496	HESI(+)	645.545	10.56	9.28	M+Na	DG(18:0_18:1)	DG 36:1	1653985608	1843963926	2597127386	2768076118	2790613283	1392029342	2359130831	2242688898	3153309718	3121849592	4157938426	3590154222	3142459332	2742821524	3538862851	3671450067	5207915910	4026062725	4819753473	4181933093	2726951784	2386188778	3842293035	3724066427	3145106699	2915535326	2341290856	4418531944	3126555731	1796699501	5627555301	5889569096	3498563911	5983962242	3313957060	5104661216
V497	HESI(+)	645.545	9.56	7.65	M+H	TG(P-4:0_20:3_14:0)	TG O-38:4	9.42091e+07	1.03813e+08	1.42661e+08	1.85997e+08	160226601	7.4491e+07	2.78334e+08	1.03443e+08	2.38132e+08	3.01409e+08	5.29037e+08	256656726	6.36503e+08	325018930	7.1601e+08	8.9102e+08	8.25163e+08	5.48525e+08	1.88699e+08	1.82618e+08	142914280	1.09794e+08	2.5439e+08	2.54891e+08	2.07929e+08	2.99533e+08	2.03574e+08	2.56931e+08	2.30287e+08	4.57567e+07	6.63638e+08	8.62189e+08	6.74054e+08	1137109807	4.40578e+08	4.47094e+08
V498	HESI(+)	646.612	9.95	8.28	M+H	Cer(d18:2_24:1)	Cer 42:3	0	0	0	0	0	0	4.48113e+06	6.70257e+06	0	2.11366e+06	3.61609e+06	0	0	2.24687e+06	0	1.41851e+06	0	3.45287e+06	0	0	0	0	0	0	1.00293e+06	6.22447e+06	7.69827e+06	4.6321e+06	2.70565e+06	1.41019e+06	1.8361e+07	1.26262e+07	79768.1	0	1.65502e+07	8.42001e+07
V499	HESI(+)	647.451	2.82	2.69	M+Na	DG(17:2_20:5)	DG 37:7	3.73301e+06	1.90062e+07	1.63995e+07	2.70019e+07	9.42871e+06	1.07402e+07	3.39329e+07	3.94843e+07	5.15051e+06	7.28508e+06	3.70707e+06	4.95804e+07	3.01963e+06	683163	720794	5.01943e+06	0	0	1.3724e+07	1.78186e+07	2.55418e+07	1.30225e+07	5.49364e+07	9.65867e+06	1.33111e+06	6.97165e+07	1.12713e+08	4.53006e+07	106806964	1.57468e+07	3239.31	80679.8	53491.1	3.94688e+06	160243	0
V500	HESI(+)	647.513	4.82	4.33	M+H	SM(d18:1_12:0)	SM 30:1	1.67651e+08	167385373	1.32593e+08	1.52563e+08	1.57675e+08	1.762e+08	1.50945e+08	1.67209e+08	1.87205e+08	1.86768e+08	1.93212e+08	150370852	1.71724e+08	2.67423e+08	219674849	1.82101e+08	1.76701e+08	1.78774e+08	1.17529e+08	1.39383e+08	1.23577e+08	137379971	1.31532e+08	1.30397e+08	173745817	1.83411e+08	1.42499e+08	1.75867e+08	1.64066e+08	1.61264e+08	1.99026e+08	2.10377e+08	3.01788e+08	2.51545e+08	1.89869e+08	1.98228e+08
V501	HESI(+)	647.557	11.18	10.16	M+Na	DG(18:0_18:0)	DG 36:0	2.57477e+07	8.70494e+07	3.91917e+07	4.88094e+07	8.42609e+07	5.26688e+07	1.36537e+07	1.45845e+07	1.18791e+07	1.22258e+07	1.22877e+07	1.07852e+07	6.61021e+06	1.19944e+07	6.55745e+06	7.83228e+06	7.58241e+06	6.31943e+06	5.08338e+07	1.11409e+07	8.91087e+06	7.67716e+06	1.04409e+07	1.05185e+07	2.36807e+07	7.0864e+06	4.85434e+06	1.0118e+07	2.52724e+07	4.13804e+07	8.33907e+06	8.07003e+06	4.99725e+06	7.54658e+06	5.79253e+06	7.24604e+06
V502	HESI(+)	647.56	10.07	8.48	M+H	DG(20:1_18:2)	DG 38:3	3.11401e+07	3.63443e+07	3.8876e+07	5.07679e+07	7.83916e+07	2.26832e+07	9.05417e+07	3.05183e+07	7.42794e+07	7.25734e+07	1.93021e+08	7.5908e+07	1.13159e+08	1.01803e+08	146317830	1.82974e+08	3.14707e+08	1.26172e+08	2.98949e+07	3.34367e+07	2.37432e+07	1.75252e+07	5.32522e+07	5.14362e+07	8.05934e+07	9.79157e+07	4.26124e+07	6.90422e+07	6.18398e+07	1.52737e+07	4.20906e+08	2.30567e+08	1.60953e+08	2.50932e+08	1.38312e+08	5.96234e+07
V503	HESI(+)	647.561	10.2	8.68	M+H	DG(18:1_20:2)	DG 38:3	8.12445e+07	8.20024e+07	6.91864e+07	9.97954e+07	1.12134e+08	3.50718e+07	8.55624e+07	3.65361e+07	6.61521e+07	6.8835e+07	1.20311e+08	7.30788e+07	1.07027e+08	4.07965e+07	1.12486e+08	1.14841e+08	5.84441e+07	1.36338e+08	5.59828e+07	5.08277e+07	5.09674e+07	4.03735e+07	6.33661e+07	6.68962e+07	5.07851e+07	6.64642e+07	5.83187e+07	7.4869e+07	5.38806e+07	2.01841e+07	8.87599e+07	1.98654e+08	1.46236e+08	2.11141e+08	1.23315e+08	3.10725e+08
V504	HESI(+)	648.558	9.31	7.29	M+Na	DG(17:0_20:4)	DG 37:4	3.82629e+06	705735	4.43211e+06	2.83768e+06	1.48507e+06	432121	2.33319e+06	1.83449e+06	4.37371e+06	6.26263e+06	5.72583e+06	850092	6.8116e+06	7.0624e+06	3.27724e+06	1.75145e+07	1.29593e+07	6.55071e+06	5.40612e+06	6.59593e+06	1.70789e+06	3.36695e+06	1.08025e+07	5.33105e+06	5.17718e+06	7.48676e+06	658725	3.38184e+06	3.19916e+06	4.22925e+06	5.64514e+06	7.50561e+06	1.51394e+07	2.31931e+07	7.13398e+06	3.75744e+06
V505	HESI(+)	648.558	9.53	7.6	M+NH4	DG(17:0_20:4)	DG 37:4	8.40975e+07	7.39003e+07	7.64122e+07	1.02253e+08	1.2293e+08	4.66256e+07	6.36783e+07	7.84916e+07	7.97455e+07	9.94969e+07	112683100	6.86795e+07	6.39636e+07	4.98288e+07	5.71019e+07	6.768e+07	5.8855e+07	5.41875e+07	8.21797e+07	7.33207e+07	7.07985e+07	6.86313e+07	1.13974e+08	9.08699e+07	3.68897e+07	9.19931e+07	9.41555e+07	71658159	6.95523e+07	5.89311e+07	8.96853e+07	6.74858e+07	8.4018e+07	9.52423e+07	4.75515e+07	6.41074e+07
V506	HESI(+)	648.593	10.35	8.94	M+H	Cer(d18:1/24:1)	Cer 42:2	1.32131e+07	2.01276e+07	2.3577e+07	3.51934e+07	2.93211e+07	9.24257e+06	1.03206e+08	2.274e+08	1.76994e+08	1.40012e+08	165337100	1.35944e+08	6.94115e+06	1.89547e+07	1.10335e+07	1.27704e+07	3.52223e+06	8.11497e+06	1.95566e+07	2.22121e+07	1.72734e+07	1.39765e+07	5.55703e+06	2.60755e+07	5.44566e+07	1.12843e+08	6.45387e+07	3.27602e+07	4.99015e+07	8.30594e+07	1.68234e+06	1.15198e+07	2.11489e+06	4.43829e+06	2.87127e+06	1.7034e+06
V507	HESI(+)	648.631	12.16	11.21	M+H	Cer(d18:2/24:0)	Cer 42:2	1.57787e+07	2.68327e+06	8.60721e+06	1.72746e+06	7.81288e+06	1.94746e+06	2.31169e+07	1.08908e+07	2.50627e+06	4.92155e+06	6.68867e+06	2.11986e+07	1.54108e+07	2.61488e+06	8.54348e+06	3.15022e+06	2.3895e+07	1.70683e+07	2.77266e+06	730361	1.6696e+06	995510	2.13055e+06	1.14541e+07	1.65531e+07	1.13082e+07	4.07283e+06	1.77696e+06	3.06817e+06	6.52032e+06	1.64835e+06	1.57291e+07	7.49656e+06	1.56119e+07	9.28225e+06	1.82955e+07
V508	HESI(+)	648.632	10.96	9.87	M+H	Cer(d18:1_24:1)	Cer 42:2	1236934404	1373122071	8.28981e+08	9.39543e+08	1125621217	8.43815e+08	2.89632e+08	6.56433e+08	2.43298e+08	2.54368e+08	3.05116e+08	2.2395e+08	1.69314e+08	2.28454e+08	1.74136e+08	1.96793e+08	1.25981e+08	2.28271e+08	5.55821e+08	487765378	5.9117e+08	4.36284e+08	6.12109e+08	525315933	9.2054e+08	3.62347e+08	1.26212e+08	2.00862e+08	3.72739e+08	318685423	1.71662e+08	2.08022e+08	1.64861e+08	1.61967e+08	2.25477e+08	1.55193e+08
V509	HESI(+)	649.577	10.63	9.38	M+H	DG(18:1_20:1)	DG 38:2	1.23003e+07	2.02511e+07	2.68513e+07	3.518e+07	3.3633e+07	1.10874e+07	5.99054e+07	1.25568e+07	4.60439e+07	3.46895e+07	1.13629e+08	5.46378e+07	5.79088e+07	4.35879e+07	9.20642e+07	8.13353e+07	1.0568e+08	110240357	1.03663e+07	1.44027e+07	6.93468e+06	7.11166e+06	8.83471e+06	8.77185e+06	4.69565e+07	4.39545e+07	1.97687e+07	35528524	3.06007e+07	4.4433e+06	2.22014e+08	1.62221e+08	8.91042e+07	1.61296e+08	1.16014e+08	1.30685e+08
V510	HESI(+)	650.402	1.67	1.48	M+NH4	BMP(4:0_22:3)	BMP 26:3	2.23193e+06	2.57453e+06	0	0	0	4.79524e+06	1.15398e+07	1.13551e+07	3.51693e+06	5.03507e+06	0	1.48933e+07	6.73979e+06	1.90234e+06	1.96735e+06	987636	4.40232e+06	0	1.8696e+06	7.61634e+06	6.10834e+06	4.91612e+06	5.13614e+06	0	0	1.27394e+07	1.37431e+07	7.34378e+06	4.99428e+07	1.11555e+07	0	0	0	1.05616e+06	0	686616
V511	HESI(+)	650.571	9.74	7.92	M+NH4	DG(19:1_18:2)	DG 37:3	8.11956e+07	8.52335e+07	114422159	1.38805e+08	2.31862e+08	5.58169e+07	9.10679e+07	6.20462e+07	1.18407e+08	109638169	1.77044e+08	9.1073e+07	6.93794e+07	6.63186e+07	8.61822e+07	1.12986e+08	1.49156e+08	8.6537e+07	1.19035e+08	1.19248e+08	1.09455e+08	9.38307e+07	2.02901e+08	1.73332e+08	1.13386e+08	1.25139e+08	1.0005e+08	9.65773e+07	1.09362e+08	3.5701e+07	1.45578e+08	1.37196e+08	1.17649e+08	2.33592e+08	8.84843e+07	6.75921e+07
V512	HESI(+)	650.572	10.09	8.5	M+Na	DG(19:1_18:2)	DG 37:3	4.3392e+06	3.73394e+06	1.34899e+07	1.81279e+07	1.54543e+07	1.59094e+06	4.86551e+06	4.52031e+06	5.34552e+06	6.01702e+06	1.29693e+07	7.54698e+06	3.89157e+06	7.73942e+06	3.4785e+06	6.38963e+06	7.78089e+06	2.5512e+06	6.19632e+06	9.2256e+06	4.82372e+06	3.69909e+06	6.68369e+06	3.95395e+06	5.93122e+06	5.00308e+06	1.10082e+06	4.21321e+06	1.01763e+07	3.4263e+06	5.21365e+06	9.32532e+06	866684	1.09771e+07	4.9089e+06	2.67614e+06
V513	HESI(+)	650.643	11.02	9.95	M+H	Cer(d18:1/24:0)	Cer 42:1	1.99451e+08	194886295	1.36668e+08	3.69292e+07	3.66249e+07	3.56066e+07	2.57367e+08	2.30242e+07	5.53548e+07	4.91074e+07	2.93072e+08	2.37008e+08	3.52545e+07	4.73873e+07	5.49818e+07	4.83096e+07	4.2395e+07	2.44486e+08	2.6664e+07	1.50354e+08	2.73242e+07	2.21106e+07	3.04623e+07	1.20598e+08	6.34934e+07	5.51639e+07	5.49906e+07	5.98664e+07	2.74805e+07	1.97907e+08	7.64447e+07	8.30306e+07	2.73986e+08	3.18284e+07	2.75447e+08	7.52054e+08
V514	HESI(+)	650.646	11.47	10.51	M+H	Cer(d18:1_24:0)	Cer 42:1	5.39777e+08	4.90506e+08	1.52732e+08	1.62215e+08	2.40174e+08	316128352	6.25162e+07	9.54983e+07	1.42048e+08	6.76005e+07	9.93987e+07	124296545	103888756	1.15665e+08	1.17668e+08	1.22132e+08	1.15786e+08	1.22608e+08	1.01665e+08	1.15013e+08	1.05481e+08	1.06524e+08	8.1464e+07	1.29065e+08	3.45175e+08	6.67663e+07	5.88173e+07	8.26235e+07	5.93704e+07	1.23832e+08	9.41397e+07	7.72514e+07	8.71103e+07	1.29735e+08	1.34992e+08	5.80137e+07
V515	HESI(+)	652.551	9.75	7.94	M+NH4	TG(2:0_16:0_18:2)	TG 36:2	4.2645e+07	1.58902e+06	3.82074e+06	1.61033e+07	1.81706e+07	1.26409e+07	9.42704e+06	2.15302e+07	1.91157e+07	3.4841e+06	2.75069e+06	1.05752e+07	1.13452e+07	5.2481e+06	1.10321e+07	5.05901e+06	3.19248e+07	4.8505e+06	1.1678e+06	1.358e+06	1.88627e+06	9.77706e+06	2.10289e+06	1.07475e+06	1.31116e+06	2.00119e+07	1.44473e+07	8.33936e+06	1.05267e+07	3.15622e+06	5.64418e+07	3.24005e+07	3.15653e+07	2.44557e+07	6.23588e+07	8.48143e+06
V516	HESI(+)	652.587	10.3	8.86	M+NH4	DG(18:1_19:1)	DG 37:2	1.37148e+07	9.36676e+06	2.03177e+07	2.08538e+07	2.44711e+07	5.09468e+06	5.60714e+07	1.00903e+07	8.72343e+07	6.7196e+07	1.24354e+08	6.85478e+07	5.21742e+07	4.84391e+07	6.92006e+07	7.57094e+07	1.08539e+08	8.48599e+07	1.55686e+07	1.69101e+07	1.12756e+07	1.37117e+07	2.09479e+07	1.72394e+07	8.50128e+07	6.98747e+07	5.14458e+07	6.0512e+07	6.50637e+07	6.07168e+06	1.74399e+08	1.19375e+08	9.49322e+07	2.03027e+08	7.82826e+07	7.13961e+07
V517	HESI(+)	652.589	10.7	9.49	M+Na	DG(18:1_19:1)	DG 37:2	2.48556e+06	6.62355e+06	6.6998e+06	8.92367e+06	1.91222e+07	4.43421e+06	5.08103e+06	6.46003e+06	8.74744e+06	8.76764e+06	4.62677e+06	6.76594e+06	61560.3	504919	63896.4	186379	564264	908783	1.41884e+07	25967378	1.14927e+07	1.21363e+07	1.56476e+07	1.40602e+07	7.46529e+06	1.03258e+07	8.50816e+06	2.26821e+07	2.33346e+07	2.86419e+07	955509	648292	277509	333530	107298	255434
V518	HESI(+)	652.59	10.39	9	M+NH4	TG(O-14:0_18:2_5:0)	TG O-37:2	9.14915e+07	8.09288e+07	8.00331e+07	9.71331e+07	1.66078e+08	4.45803e+07	1.63987e+07	3.78522e+07	1.90471e+07	1.93444e+07	2.74005e+07	1.64815e+07	8.94576e+06	8.13781e+06	8.70426e+06	1.15165e+07	1.06514e+07	1.01902e+07	6.81628e+07	8.08217e+07	5.69142e+07	5.13186e+07	9.48778e+07	8.99719e+07	7.81695e+07	1.6481e+07	1.43324e+07	1.71984e+07	1.58492e+07	2.6803e+07	1.82397e+07	1.04074e+07	8.95755e+06	2.81203e+07	7.38423e+06	9.14091e+06
V519	HESI(+)	653.441	5.66	4.76	M+H	PG(18:0_9:0)	PG 27:0	4.14873e+07	5.88809e+07	7.90266e+06	2.91922e+07	2.90406e+07	1.38593e+07	7.31289e+07	7.39488e+07	4.72431e+07	4.09325e+07	2.90278e+07	4.34988e+07	1.76387e+07	2.60488e+07	5.01767e+07	4.16933e+07	2.06554e+07	1.28741e+07	99415533	8.99374e+07	8.75426e+07	9.86018e+07	3.87857e+07	7.51908e+07	7.0198e+07	8.62004e+07	1.7775e+08	1.5625e+08	1.08645e+08	7.93022e+07	7.40442e+07	7.87775e+07	1.03869e+08	9.21146e+07	7.9001e+07	7.392e+07
V520	HESI(+)	653.512	9.52	7.59	M+Na	DG(17:0_20:4)	DG 37:4	1.32472e+08	130053921	109476265	1.41097e+08	175203348	7.84918e+07	7.25274e+07	1.06563e+08	9.62858e+07	115703850	1.13887e+08	8.36425e+07	7.16365e+07	5.69684e+07	5.66819e+07	5.43891e+07	4.99403e+07	5.35105e+07	1.18074e+08	9.06932e+07	1.01233e+08	108086386	1.41922e+08	1.28804e+08	4.5129e+07	1.00746e+08	1.0432e+08	8.81277e+07	7.15323e+07	8.31398e+07	6.16826e+07	5.4243e+07	8.13304e+07	7.4626e+07	6.04369e+07	5.39582e+07
V521	HESI(+)	653.513	9.59	7.69	M+H	TG(P-22:6_2:0_15:0)	TG O-39:7	1.57939e+07	1.93604e+07	1.83737e+07	1.63205e+07	2.22612e+07	1.10131e+07	1.09268e+07	1.06469e+07	9.83072e+06	1.01796e+07	1.67495e+07	1.16556e+07	9.70235e+06	7.67095e+06	5.69508e+06	5.44058e+06	4.81276e+06	8.09671e+06	1.62264e+07	1.53293e+07	1.52448e+07	1.13364e+07	2.05727e+07	1.96006e+07	6.4665e+06	1.13349e+07	1.50516e+07	9.70838e+06	7.6295e+06	1.1416e+07	7.50976e+06	5.79096e+06	7.45757e+06	1.01678e+07	8.51897e+06	7.33615e+06
V522	HESI(+)	654.568	10.33	8.91	M+NH4	TG(2:0_16:0_18:1)	TG 36:1	5.28165e+07	3.43261e+06	6.35905e+06	6.21837e+06	6.24173e+06	3.3671e+06	2.78076e+07	6.18687e+07	5.12238e+07	4.85145e+07	5.14571e+07	3.9843e+07	4.43904e+06	3.1641e+06	6.96203e+06	2.64729e+06	2.68799e+07	3.90713e+06	7.09344e+06	4.3122e+06	3.10672e+06	2.60891e+06	373082	7.22944e+06	1.6616e+07	1.60696e+07	1.09557e+07	7.01739e+06	6.66962e+06	2.61382e+07	5.9536e+07	2.48087e+07	2.81626e+07	2.76604e+07	7.13583e+07	1.25518e+07
V523	HESI(+)	656.521	8.6	6.47	M+NH4	TG(P-10:0_6:0_22:6)	TG O-38:7	1.56264e+06	1.38128e+06	168521	538355	9.741e+06	0	9.58052e+06	1.50181e+06	189577	0	56444.5	0	7.40897e+06	3.36812e+06	1.58103e+07	2.05903e+07	2.25635e+07	39233.4	0	4.75222e+06	0	0	0	1.69447e+06	1.99191e+07	469048	0	0	3.32535e+06	0	1.16796e+07	8.94626e+06	3.30812e+06	2.49408e+07	3.33851e+06	4.70878e+06
V524	HESI(+)	656.522	14.01	12.39	M+Na	DG(18:2_20:5)	DG 38:7	6.88854e+06	3.93231e+06	3.82515e+06	3.98665e+06	1.42234e+07	3.24196e+06	1.60011e+07	4.93559e+06	1.80243e+06	4.42039e+06	1.50993e+07	4.98714e+06	1.15572e+06	1.93625e+06	9.89619e+06	6.70312e+06	2.10076e+06	0	1.19259e+07	1.84765e+07	2.6284e+06	6.12521e+06	5.8998e+06	7.57428e+06	5.012e+06	1.24973e+07	6.24627e+06	3.08062e+06	4.559e+06	3.5255e+06	1.76213e+06	1.46995e+07	4.13952e+06	5.66146e+06	1.76738e+06	0
V525	HESI(+)	656.526	8.1	6.04	M+NH4	DG(18:2_20:5)	DG 38:7	6.17262e+07	7.95408e+07	8.34931e+07	1.02851e+08	2.3412e+08	8.69133e+07	1.44543e+08	4.34234e+07	8.33978e+07	1.13381e+08	1.6225e+08	8.08532e+07	3.37203e+08	212658891	4.37353e+08	5.41847e+08	5.56189e+08	274733215	1.54362e+08	1.06437e+08	2.319e+08	1.03354e+08	211232790	1.41313e+08	1.49732e+08	153621838	7.7797e+07	6.02072e+07	1.1394e+08	5.53258e+07	4.89547e+08	5.45156e+08	5.93491e+08	8.20058e+08	3.49682e+08	2.20847e+08
V526	HESI(+)	656.584	10.92	9.82	M+NH4	TG(4:0_16:0_16:0)	TG 36:0	7.77216e+07	2.74672e+06	3.08276e+06	4.46838e+06	3.18825e+06	1.24004e+06	4.79609e+06	4.84605e+06	1.74698e+06	6.46315e+06	6.12646e+06	2.98615e+06	1.79215e+06	1.45134e+06	1.81432e+06	1.27703e+06	1.76268e+06	873995	4.66415e+06	1.31998e+06	2.2661e+06	1.59586e+06	4.49122e+06	1.04817e+06	1.0011e+06	6.33805e+06	753030	2.2351e+06	7.12209e+06	5.27834e+06	2.30061e+06	2.33604e+06	605362	2.68402e+06	5.44649e+06	224707
V527	HESI(+)	657.484	9.42	7.44	M+H	PEt(O-12:0_20:3)	PEt O-32:3	4.78e+07	3.47451e+07	4.52581e+07	4.94113e+07	5.62517e+07	2.69041e+07	5.6025e+07	4.85553e+07	8.45458e+07	7.20269e+07	9.27106e+07	6.09428e+07	1.01431e+08	7.15732e+07	8.94912e+07	9.11342e+07	1.15266e+08	7.70715e+07	4.94736e+08	7.89783e+07	7.58799e+07	7.15275e+07	1.05105e+08	1.27293e+08	6.28374e+07	7.40295e+07	5.13374e+07	7.17271e+07	6.63273e+07	2.6858e+07	8.54387e+07	8.70126e+07	9.18374e+07	1.15381e+08	9.86445e+07	8.34669e+07
V528	HESI(+)	657.488	9.35	7.35	M+H	DAP(O-16:2_20:5)	DAP O-36:7	6.43134e+07	1.40971e+08	2.22508e+08	2.46468e+08	2.76577e+08	6.0779e+07	3.25322e+08	2.75279e+08	4.27611e+08	4.34976e+08	4.33009e+08	3.58351e+08	434095436	3.66775e+08	4.41388e+08	4.91597e+08	5.48383e+08	360179071	5.08473e+08	2.72139e+08	4.20601e+08	3.9219e+08	4.78867e+08	5.03613e+08	3.42064e+08	3.81404e+08	3.74248e+08	380303690	3.53941e+08	1.83557e+08	4.13325e+08	4.45574e+08	4.38723e+08	4.59999e+08	4.00638e+08	3.71306e+08
V529	HESI(+)	657.543	10.39	9	M+NH4	DG(18:0_19:2)	DG 37:2	1.93898e+08	1.81458e+08	1.91352e+08	2.36994e+08	4.06343e+08	1.17027e+08	2.20757e+07	2.37979e+07	3.58398e+07	3.64657e+07	5.60655e+07	3.48263e+07	1.4607e+07	9.17115e+06	2.2046e+07	24136973	2.68134e+07	2.10253e+07	1.63849e+08	1.54295e+08	1.22313e+08	1.19189e+08	2.10521e+08	2.04671e+08	4.38012e+07	2.67255e+07	2.55848e+07	3.13031e+07	2.93792e+07	4.65063e+07	3.28177e+07	2.19074e+07	1.98309e+07	38906306	1.70018e+07	1.37335e+07
V530	HESI(+)	657.544	10.3	8.86	M+H	DG(16:0_23:5)	DG 39:5	2.95994e+07	3.08187e+07	4.71864e+07	6.41917e+07	5.82781e+07	1.98515e+07	9.1964e+07	6.75242e+07	174378106	1.30483e+08	2.49498e+08	1.39169e+08	1.28623e+08	9.58975e+07	149320244	1.63093e+08	2.53936e+08	1.96759e+08	3.72414e+07	3.43177e+07	3.342e+07	3.25585e+07	4.30467e+07	3.99298e+07	1.52981e+08	1.19256e+08	9.07658e+07	1.20744e+08	1.209e+08	1.16472e+07	2.90566e+08	233484952	2.20438e+08	3.8883e+08	1.89537e+08	1.57254e+08
V531	HESI(+)	658.532	7.88	5.87	M+Na	DG(18:2_20:4)	DG 38:6	4.92431e+06	5.70637e+06	0	0	5.66543e+06	6.93032e+06	0	1.22251e+06	0	0	0	0	3.06048e+06	5.01839e+06	5.14942e+06	3.57296e+06	727910	0	1.57667e+07	1.6479e+07	2.10641e+07	1.00674e+07	3.61213e+07	2.73539e+07	1.94977e+06	0	5.03407e+06	0	0	0	918910	2.06733e+06	925384	2.59391e+06	0	0
V532	HESI(+)	658.54	8.61	6.48	M+NH4	DG(18:2_20:4)	DG 38:6	2.11231e+08	1.9815e+08	189439429	2.13177e+08	2.87413e+08	1.93592e+08	3.36057e+08	1.84265e+08	2.13188e+08	3.209e+08	3.63384e+08	162840610	2.07662e+08	3.73511e+08	371744054	4.33407e+08	3.91927e+08	1.50127e+08	315029212	4.08767e+08	4.62155e+08	308706762	5.23772e+08	4.10672e+08	523583978	300357897	2.99995e+08	1.4762e+08	229789786	1.46357e+08	3.10806e+08	2.86315e+08	2.77984e+08	3.24864e+08	1.81434e+08	6.97503e+07
V533	HESI(+)	658.541	8.85	6.73	M+NH4	DG(16:0_22:6)	DG 38:6	1893569263	1895425207	1837341864	2263029630	1458461134	1854182730	1544609199	1372690443	9.69287e+08	1329816503	1738160515	2005895332	19295810561	11580973794	20695880046	27025227537	24890849208	17715684756	2312224019	2959882573	3186772955	2635126350	4806292375	3616921637	2200978940	4184438335	2749734715	3306341924	2507591344	2424624375	36104455310	26624883853	30772434254	36258456803	16328900877	12274150061
V534	HESI(+)	658.541	8.48	6.36	M+NH4	DG(16:0_22:6)	DG 38:6	1.45317e+07	1.82706e+07	1.06811e+07	2.38626e+07	8.50843e+06	4.19308e+06	1.22545e+07	4.38948e+06	1.97083e+07	3.36596e+07	1.30862e+07	1.94724e+06	6.6941e+06	1.10792e+07	8.85433e+06	1.64716e+07	5.3201e+06	6.3935e+06	7.3454e+06	4.40217e+06	4.25702e+06	7.31526e+06	1.97811e+07	1.3166e+07	2.74156e+07	1.05937e+07	4.86512e+06	3.45404e+06	7.14606e+06	3.60117e+06	3.57227e+06	5.84882e+06	4.48605e+06	8.23853e+06	3.49938e+06	3.83313e+06
V535	HESI(+)	658.541	8.92	6.82	M+NH4	TG(O-13:1_5:0_20:5)	TG O-38:6	1.05321e+08	1.52727e+08	1.71993e+08	1.86957e+08	9.74112e+07	1.56031e+08	112453208	1.1673e+08	9.7152e+07	1.34263e+08	1.54781e+08	1.90946e+08	2116330516	6.86947e+08	1240554507	2770954742	2161617086	2156374535	2.35053e+08	2.53516e+08	2.02546e+08	1.66405e+08	3.28161e+08	2.51272e+08	1.86229e+08	3.33137e+08	2.78492e+08	3.3755e+08	1.88711e+08	2.22601e+08	2709976168	1745889096	2491014845	3459941876	1816928261	1765590698
V536	HESI(+)	658.541	9.29	7.26	M+NH4	DG(18:1_20:5)	DG 38:6	1.92593e+07	3.14413e+07	5.61989e+07	4.81207e+07	1.65271e+07	3.60768e+07	4.18349e+07	3.61089e+07	1.26382e+07	3.00237e+07	3.20239e+07	3.04279e+07	7.02154e+08	1.38193e+08	2.76477e+08	7.31888e+08	3.92553e+08	6.84433e+08	4.49879e+07	5.28121e+07	5.87304e+07	6.79102e+07	5.6882e+07	5.00082e+07	4.06799e+07	7.44812e+07	5.39051e+07	5.77121e+07	4.71419e+07	6.3293e+07	4.82988e+08	3.87377e+08	9.20505e+08	6.84251e+08	2.12658e+08	4.67282e+08
V537	HESI(+)	659.503	11.74	10.8	M+H	Co(Q7)	Co 7:0	6.45403e+07	6.77197e+07	7.27322e+07	8.19102e+07	7.2365e+07	4.76616e+07	4.37269e+07	6.68818e+07	4.33253e+07	4.93855e+07	4.39645e+07	3.93653e+07	1.46737e+07	3.55868e+07	1.0486e+07	1.23491e+07	8.71284e+06	1.41376e+07	7.07033e+07	8.73137e+07	8.05552e+07	9.53929e+07	8.26173e+07	6.89836e+07	5.09585e+07	3.81004e+07	4.77092e+07	5.35361e+07	4.448e+07	6.50527e+07	1.09341e+07	1.08538e+07	1.40177e+07	1.48456e+07	5.64945e+06	1.83585e+07
V538	HESI(+)	659.572	9.85	8.11	M+Na	WE(O-22:2_22:4)	WE O-44:6	1.65103e+06	869182	2.70668e+06	770803	539925	8.26164e+06	416039	2.13393e+06	958981	632597	103227	1.85079e+06	0	0	0	11135.5	0	162.008	2.11928e+06	4.83755e+06	2.11789e+06	2.52854e+06	2.70681e+06	666690	21761.4	446954	807036	1.57637e+06	7.90657e+06	1.49506e+07	0	0	0	664.882	0	0
V539	HESI(+)	660.556	5.08	4.48	M+Na	DG(16:0_22:5)	DG 38:5	3.97286e+06	4.71457e+06	1.07818e+07	6.16144e+06	1.01984e+06	7.67029e+06	594196	2.59118e+06	606950	893139	172139	3.60373e+06	274538	71769	368749	540606	14314.4	1.28309e+06	9.30798e+06	5.82484e+06	1.05341e+07	1.01774e+07	7.44081e+06	4.46939e+06	447842	1.57471e+06	5.34027e+06	4.30826e+06	7.75864e+06	1.41298e+07	145281	0	778864	395064	0	219025
V540	HESI(+)	660.556	9.1	7.02	M+NH4	TG(O-14:1_4:0_20:4)	TG O-38:5	2.07672e+08	2.55307e+08	2.0033e+08	1.52427e+08	2.69908e+08	1.93204e+08	6.24093e+07	5.17928e+07	2.87076e+07	7.55348e+07	6.25931e+07	3.29768e+07	6.00976e+08	4.44746e+08	6.90185e+08	8.42091e+08	1252981705	3.31239e+08	4.26058e+08	314954053	4.5143e+08	2.61937e+08	8.79183e+08	5.48185e+08	2.28691e+08	173121772	7.5473e+07	130872785	4.01212e+07	1.06969e+08	6.39202e+08	4.39989e+08	4.95898e+08	9.8518e+08	319328123	162577547
V541	HESI(+)	660.556	9.42	7.44	M+NH4	DG(18:2_20:3)	DG 38:5	7.46652e+07	7.97683e+07	1.23831e+08	1.70728e+08	9.827e+07	5.83083e+07	1.65881e+08	1.66277e+08	1.81245e+08	2.08496e+08	278003803	6.81221e+08	1134934214	633370068	1277230952	2003024721	1477683839	2232161185	5.94034e+08	1.19967e+08	1.64575e+08	5.56141e+08	1.8396e+08	1.29444e+08	1.24026e+08	2.04115e+08	1.70394e+08	5.61679e+08	1.4776e+08	4.4464e+08	1726300093	1646638890	2297120173	2431393804	1136516819	3028478397
V542	HESI(+)	660.557	9.24	7.21	M+NH4	DG(18:1_20:4)	DG 38:5	1447267777	1462138585	2138077072	3322488398	2583786228	1153150348	4085868194	3256337420	3609858210	4351542604	5530803019	3070336828	3625138197	3099749640	3283522591	4193931376	3466744694	2874750756	2245934734	3015128103	2450172885	1839255010	3188003495	3186979866	3793776690	4285043379	3527297658	2789726302	3110897021	1578681426	3264869686	3726911862	3502342922	3175046890	2950140570	3106682231
V543	HESI(+)	660.557	8.92	6.81	M+NH4	TG(O-15:1_3:0_20:4)	TG O-38:5	5.53501e+08	6.39441e+08	7.1305e+08	7.93383e+08	8.76377e+08	5.78176e+08	9.70649e+08	5.98017e+08	8.0015e+08	1075779915	1827603543	905776632	2761447291	4.23243e+08	7.38473e+08	1279930484	3829458104	6.28327e+08	1089558867	1117396322	9.55541e+08	7.11596e+08	2394286005	2360215116	1072992026	1159489986	8.77044e+08	9.02218e+08	1043766177	4.31645e+08	6.98107e+08	9.88007e+08	791290338	1186858114	5.1664e+08	3.33961e+08
V544	HESI(+)	661.43	2.99	2.86	M+H	SM(d18:4_14:4)	SM 32:8	1.14099e+07	2.14089e+07	2.32005e+07	2.56051e+07	1.30061e+07	2.71973e+07	4.34892e+07	3.27636e+07	1.4542e+07	1.301e+07	1.18985e+07	6.59729e+07	4.1876e+06	823436	1.61992e+06	3.7425e+06	345904	2.14985e+06	3.41374e+07	4.31569e+07	1.51933e+07	2.04957e+07	5.95615e+07	1.57729e+07	7.39137e+06	6.90451e+07	7.94723e+07	5.37872e+07	1.67995e+08	3.70235e+07	144023	250976	146817	6.81478e+06	872417	0
V545	HESI(+)	661.479	5.63	4.75	M+Na	DG(18:3_20:4)	DG 38:7	1.19735e+07	1.47453e+07	2.62093e+07	1.34503e+07	7.90497e+06	3.51934e+07	3.46072e+06	3.25121e+07	9.65013e+06	4.31976e+06	2.66232e+06	4.111e+06	1.80859e+06	0	520064	9.73542e+06	252651	788750	2.60544e+07	4.75215e+07	4.98144e+07	4.45139e+07	5.53729e+07	2.59934e+07	2.11772e+06	5.50881e+07	6.53829e+07	4.21763e+07	5.07791e+07	3.88875e+07	0	0	0	8.47197e+06	0	90692.1
V546	HESI(+)	662.57	9.99	8.34	M+NH4	DG(18:2_20:2)	DG 38:4	923724009	6.64973e+08	5.68034e+08	6.03396e+08	7.43003e+08	358416577	7.47817e+08	5.7178e+08	6.0957e+08	8.5619e+08	8.88085e+08	7.21946e+08	820659591	5.82167e+08	6.16946e+08	7.07193e+08	3.60903e+08	4.14029e+08	8.90357e+08	7.9829e+08	5.97629e+08	5.1285e+08	7.91912e+08	709212465	4.48532e+08	821075561	7.34358e+08	4.77975e+08	3.88451e+08	5.21345e+08	5.53952e+08	855061137	5.42097e+08	704760488	4.51657e+08	560178212
V547	HESI(+)	662.573	10.42	9.06	M+NH4	DG(18:0_20:4)	DG 38:4	1.52156e+08	1.5248e+08	1.2086e+08	1.36107e+08	2.07999e+08	8.22015e+07	181368585	2.09444e+08	1.8402e+08	1.83791e+08	2.54136e+08	1.72198e+08	174800710	1.42706e+08	127496536	1.09163e+08	2.93968e+07	6.03397e+07	1.85348e+08	1.52029e+08	1.48942e+08	1.01649e+08	1.65837e+08	1.82952e+08	1.40951e+08	1.94726e+08	1.49972e+08	136461930	1.15945e+08	6.9522e+07	3.15784e+07	3.97181e+07	3.76103e+07	149457246	2.76459e+07	3.14304e+07
V548	HESI(+)	662.573	9.8	8.02	M+NH4	TG(O-15:0_3:0_20:4)	TG O-38:4	6.9176e+07	7.55955e+07	1.85433e+08	2.17295e+08	1.2452e+08	4.92988e+07	2.68369e+08	1.40301e+08	299716020	3.14869e+08	4.65004e+08	2.92053e+08	266387744	2.38445e+08	5.68802e+08	527811675	5.1485e+08	7.86847e+08	1.68596e+08	1.48695e+08	1.28136e+08	1.07247e+08	1.43213e+08	1.04796e+08	2.83568e+08	3.04166e+08	2.26493e+08	4.27778e+08	4.50567e+08	1.16802e+08	1145320349	8.74164e+08	457756389	7.5922e+08	7.39909e+08	1762774644
V549	HESI(+)	662.574	9.56	7.65	M+NH4	DG(18:1_20:3)	DG 38:4	9.18964e+08	1007139884	1383423438	1814208583	1607576416	6.57427e+08	2837301912	1232377391	2511732277	3105749152	5259058444	2574012275	5177074454	2966826545	6027459371	7270686237	7084323855	4525083713	1682731818	1622467954	1287121986	1045827958	1908973156	1854639749	2176746503	3052405807	2006347444	2412670300	2290664761	4.68338e+08	5551967734	7329248141	5630177933	8844777863	3817776155	3939356613
V550	HESI(+)	662.646	11.16	10.14	M+H	Cer(d19:1_24:1)	Cer 43:2	7.08361e+06	3.63661e+07	4.0028e+07	1.45428e+07	7.1842e+06	2.38033e+07	4.46157e+06	7.43435e+06	8.52336e+06	6.4917e+06	2.87004e+07	6.13342e+06	3.14102e+06	4.33202e+06	4.36657e+06	4.25134e+06	2.12295e+06	2.31363e+07	3.48489e+07	4.4852e+07	3.54005e+07	3.76504e+07	4.15275e+07	4.11839e+07	5.9592e+06	6.04817e+06	4.98128e+06	6.41785e+06	2.25284e+07	3.81676e+07	4.45033e+06	3.03089e+06	3.41183e+06	6.28429e+06	5.87735e+06	2.11088e+06
V551	HESI(+)	663.497	8.61	6.48	M+Na	TG(O-13:0_3:0_22:6)	TG O-38:6	1.85477e+07	2.30975e+07	3.01676e+07	3.23387e+07	4.96791e+07	2.9752e+07	2.38584e+07	1.10008e+07	2.21213e+07	2.95784e+07	1.64404e+07	1.70117e+07	3.22541e+07	4.05889e+07	7.39173e+07	7.89491e+07	8.47087e+07	2.05165e+07	5.73053e+07	6.29924e+07	7.8786e+07	5.22824e+07	8.65535e+07	8.20015e+07	8.66383e+07	2.30004e+07	2.70998e+07	1.09386e+07	2.76641e+07	1.69642e+07	5.4347e+07	3.83343e+07	3.72187e+07	6.4251e+07	3.28807e+07	6.26805e+06
V552	HESI(+)	663.497	8.85	6.74	M+H	PEt(15:0_16:0)	PEt 31:0	1121580473	1216889952	1018252782	1118889623	7.78935e+08	1192086249	6.51601e+08	5.57135e+08	4.53042e+08	6.10761e+08	7.08542e+08	8.51527e+08	8903837627	5290436591	7973132534	11697065149	10682984460	7077581258	1255088799	1755720869	1695838541	1536405468	2403314037	1833623910	1374653453	1521598854	1179185443	1344450053	1123239963	1219017511	10906300861	7812199105	10268731425	12432880095	7141296364	4930358884
V553	HESI(+)	664.588	10.2	8.69	M+NH4	DG(18:1_20:2)	DG 38:3	5.3822e+08	5.73871e+08	6.62889e+08	8.9209e+08	1003292718	324335650	8.81687e+08	3.89944e+08	6.63705e+08	6.37882e+08	746686325	4.0164e+08	5.28625e+08	2.41666e+08	5.52071e+08	5.46266e+08	6.23755e+08	6.77999e+08	5.61896e+08	5.14513e+08	4.9184e+08	3.59216e+08	6.18573e+08	5.93534e+08	3.11669e+08	3.99274e+08	5.81356e+08	6.85615e+08	5.87871e+08	2.79843e+08	1035654423	9.86622e+08	7.83165e+08	9.65249e+08	651956877	9.26652e+08
V554	HESI(+)	664.588	10.07	8.48	M+NH4	DG(20:1_18:2)	DG 38:3	6.92294e+08	811298432	9.40098e+08	1092556018	1671584572	5.14238e+08	1922577892	8.65594e+08	1785307855	1707841078	5288818432	2437910166	3292372958	2477468526	4114934964	4532193531	5065747684	4043160735	7.15518e+08	7.88114e+08	5.24295e+08	475053468	1078951073	1108846345	2251879402	2572871486	9.76674e+08	1544638687	1353695955	3.33376e+08	7119290071	6734663182	4889911447	6977879314	3936736039	9.15581e+08
V555	HESI(+)	665.511	5.66	4.76	M+Na	DG(13:0_25:5)	DG 38:5	2.23021e+08	5.95749e+08	481706030	7.22481e+08	4.58964e+08	4.44661e+08	5.11365e+08	8.10813e+08	3.16196e+08	3.11535e+08	1.5019e+08	8.70996e+08	7.42746e+07	1.03779e+07	2.0216e+07	101712698	2939378	3.30554e+07	6.41679e+08	1059269897	7.80735e+08	8.2626e+08	1332568303	5.31908e+08	1.75378e+08	1159075132	1561967742	9.77129e+08	2221052183	3.13502e+08	9.392e+06	2.25734e+06	2.08913e+06	3.18219e+07	4.52045e+06	7986.84
V556	HESI(+)	665.511	9.43	7.45	M+Na	DG(18:2_20:3)	DG 38:5	1.56849e+08	1.70411e+08	2.80996e+08	328754163	8.75201e+07	116106540	415800949	1.32989e+08	4.50467e+08	5.83405e+08	440277820	5.27327e+08	1130373364	6.00499e+08	1223393575	1824923368	1318046781	2120782339	619921274	3.77183e+08	1.62596e+08	117142430	4.21605e+08	3.5934e+08	3.03998e+08	1.64432e+08	148209841	4.95308e+08	1.07199e+08	4.88317e+08	1303503058	1313094968	1919845316	1974686017	1136785290	2810744009
V557	HESI(+)	665.511	9.25	7.22	M+Na	DG(18:1_20:4)	DG 38:5	7.05483e+08	8.2617e+08	1027055882	1190576202	1349119382	6.91386e+08	1852466030	2044500901	1672745302	2309786500	2630105381	1603090874	2186451421	1917422547	1974252458	2602693294	2192136284	1311344504	1147283876	1292744983	1147414807	1005782087	1367111481	1557844174	1314249726	2306720718	1930913292	1252094683	1706469222	9.90284e+08	1694675649	1864037187	1937167487	1834285617	1547331483	1350755149
V558	HESI(+)	665.511	8.91	6.8	M+H	TG(O-12:0_4:0_24:8)	TG O-40:8	2.23723e+08	2.98622e+08	2.92167e+08	3.05035e+08	3.18872e+08	2.49468e+08	3.22492e+08	1.91223e+08	2.9141e+08	4.49932e+08	6.09933e+08	3.37584e+08	1071056866	6.09702e+08	940613976	1290618151	1268507594	753764261	4.48328e+08	4.44446e+08	3.72253e+08	301388611	773385026	8.76028e+08	4.78548e+08	3.29132e+08	3.04938e+08	3.1243e+08	329202358	1.73228e+08	2.83218e+08	8.14467e+08	2.86227e+08	1297753290	7.97258e+08	4.25966e+08
V559	HESI(+)	666.603	10.63	9.38	M+NH4	DG(18:1_20:1)	DG 38:2	8.07542e+08	9.08031e+08	1051810688	1389495909	1502059395	5.07873e+08	2362861956	5.89503e+08	1823297182	1358675525	3886483680	2110602851	2056725946	1660980908	3275564185	2869609458	3719744919	3655797708	4.6474e+08	5.88204e+08	3.36345e+08	303131771	4.71426e+08	4.5874e+08	1979943958	1773476000	7.23353e+08	1377569981	1214294630	272600837	7851193411	5920910320	3121805831	5265488644	3804764171	4429747172
V560	HESI(+)	666.604	11.16	10.14	M+NH4	CE(18:2)	CE 18:2	1.62599e+07	1.55674e+07	1.18874e+07	1.18866e+07	1.68874e+07	1.28514e+06	1.72662e+07	6.88418e+06	1.72355e+07	4.44915e+06	4.93796e+07	23108932	8.93428e+06	1.48494e+07	9.82082e+06	11018292	1.38918e+07	1.34771e+07	630304	407272	1.1254e+06	564379	3.73535e+06	1.14729e+06	2.10194e+07	1.39415e+07	4.42808e+06	1.31769e+07	7.35254e+06	135466	2.24689e+07	1.67904e+07	9.61217e+06	1.77745e+07	1.03849e+07	1.5356e+07
V561	HESI(+)	666.639	10.41	9.03	M+NH4	DG(O-15:1_24:1)	DG O-39:2	1.59293e+08	1.2778e+08	7.49132e+07	9.4497e+07	9.24392e+07	7.66192e+07	6.91563e+07	4.40206e+07	5.36203e+07	5.84564e+07	6.41848e+07	5.06825e+07	4.07604e+07	5.25341e+07	4.34361e+07	4.7901e+07	3.4194e+07	4.55426e+07	6.39029e+07	7.48878e+07	6.53098e+07	5.83089e+07	7.32288e+07	7.38914e+07	7.74318e+07	3.61746e+07	2.58032e+07	3.19405e+07	2.6442e+07	3.27548e+07	4.04866e+07	3.30961e+07	2.88187e+07	4.47548e+07	4.81492e+07	2.52196e+07
V562	HESI(+)	667.526	9.79	8.01	M+NH4	DG(18:0_20:4)	DG 38:4	6.67782e+07	5.28856e+07	2.13304e+08	2.17952e+08	1.42274e+08	5.60012e+07	2.37588e+08	135847053	2.88855e+08	3.61203e+08	4.68538e+08	3.19903e+08	3.73549e+08	2.22191e+08	5.41372e+08	4.83315e+08	4.81438e+08	8.45157e+08	1.7912e+08	9.67479e+07	1.18005e+08	1.1036e+08	102837715	1.19183e+08	1.96414e+08	199569731	208664975	2.98239e+08	3.99837e+08	1.69341e+08	860523015	677536871	4.01566e+08	6.53485e+08	9.62016e+08	1843160478
V563	HESI(+)	667.526	9.93	8.24	M+Na	DG(20:1_18:3)	DG 38:4	4420978484	4323224785	3339223214	3811557968	5556609261	1873805790	4350611066	4090293502	4073624148	4751225350	6520461777	3858438485	4825113234	4906898437	3541718508	4106253078	3101973788	3155859166	4349911262	4021907003	2981338696	2378925331	4342320040	4540402209	3237374629	4320485228	3771299433	4165535633	2531977190	2670146097	2615744716	3705979116	3931182459	3198960685	3149913853	2743625490
V564	HESI(+)	667.527	9.56	7.65	M+H	TG(P-6:0_12:0_22:6)	TG O-40:7	1090062085	1200769910	1538119191	1867543943	1788843723	8.14195e+08	2536196828	1635383418	2618396203	3037618157	4616587590	2533230795	5141001368	3085219065	5670669692	6551779781	6492241239	4494652815	1792268780	1606337606	1396812157	1193772767	2218312341	2495946425	2201881946	2629646556	1860545522	2294299475	1970013345	5.37818e+08	4683715030	5915194406	5126182592	7632922570	4036291329	3897783742
V565	HESI(+)	667.527	9.63	7.76	M+H	TG(O-15:1_5:0_20:6)	TG O-40:7	1.882e+08	1.99494e+08	2.91078e+08	3.18979e+08	2.75984e+08	1.26246e+08	4.67295e+08	3.04058e+08	4.73345e+08	569481543	8.41271e+08	4.91921e+08	9.47532e+08	5.57191e+08	900767258	1446412527	1171044381	1026814532	3.27275e+08	2.44491e+08	2.3192e+08	1.72924e+08	2.81346e+08	3.3543e+08	437730594	4.84415e+08	3.14533e+08	3.97539e+08	3.33094e+08	3.84539e+08	9.67009e+08	1279176700	8.83994e+08	1674854554	8.35353e+08	9.57996e+08
V566	HESI(+)	667.527	9.99	8.34	M+Na	DG(18:2_20:2)	DG 38:4	8.36746e+08	6.76497e+08	6.52337e+08	6.16621e+08	7.92484e+08	4.03098e+08	6.13468e+08	5.30476e+08	521775199	840848385	8.2112e+08	6.63224e+08	8.31188e+08	4.9561e+08	5.26326e+08	5.63122e+08	2.92926e+08	4.10901e+08	8.65639e+08	6.66267e+08	5.28186e+08	4.67242e+08	7.33992e+08	7.53273e+08	3.51616e+08	6.37763e+08	6.33918e+08	4.76721e+08	3.70653e+08	5.29977e+08	2.84344e+08	4.92486e+08	4.35616e+08	4.81718e+08	4.38588e+08	4.47649e+08
V567	HESI(+)	667.531	10.41	9.05	M+Na	DG(18:0_20:4)	DG 38:4	2.14769e+08	1.19511e+08	1.78148e+08	1.90284e+08	1.90367e+08	1.31697e+08	2.32933e+08	2.59418e+08	2.32075e+08	2.84979e+08	3.62801e+08	253062095	7.46155e+07	3.22776e+07	4.99233e+07	1.71335e+08	4.54477e+07	4.76717e+07	2.7553e+08	1.01783e+08	1.20825e+08	159271746	1.48878e+08	2.87565e+08	2.19438e+08	1.03135e+08	9.55505e+07	2.15473e+08	8.8273e+07	7.10427e+07	4.52597e+07	5.68792e+07	5.33128e+07	1.16319e+08	3.78103e+07	3.06683e+07
V568	HESI(+)	667.531	8.97	6.86	M+H	TG(P-4:0_22:6_14:0)	TG O-40:7	8.2884e+07	1.07902e+08	1.36743e+08	1.67101e+08	3.83713e+08	9.43097e+07	3.60162e+08	2.11088e+08	2.36251e+08	3.88961e+08	6.24985e+08	2.85965e+08	8.05133e+08	850178200	8.59654e+08	940032393	6.74313e+08	5.73621e+08	3.05821e+08	3.31259e+08	3.34232e+08	1.87824e+08	5.19431e+08	4.93947e+08	4.65661e+08	2.93751e+08	2.80726e+08	2.42281e+08	4.03008e+08	1.12338e+08	7.36074e+08	9.41851e+08	8.10478e+08	8.51517e+08	6.23217e+08	4.49294e+08
V569	HESI(+)	667.531	9.03	6.94	M+H	DG(18:1_22:6)	DG 40:7	1.30983e+07	1.75633e+07	1.83483e+07	1.96828e+07	6.6269e+07	1.51172e+07	4.88633e+07	2.56581e+07	2.88034e+07	4.75836e+07	7.24109e+07	2.83482e+07	1.37947e+08	1.14569e+08	9.32399e+07	1.47288e+08	8.4803e+07	5.82631e+08	4.62337e+07	5.27685e+07	5.76207e+07	22839636	6.20094e+07	5.49119e+07	5.93174e+07	2.96059e+07	3.78364e+07	3.56286e+07	4.18067e+07	1.53579e+07	1.55956e+08	1.71985e+08	9.23511e+07	1.40748e+08	6.25108e+08	4.2425e+08
V570	HESI(+)	668.595	10.19	8.67	M+H-H2O	Cer(d18:1_26:3)	Cer 44:4	2352817300	2532349502	3038452606	3737285993	2676811347	1716295383	3671959300	3801398731	3636853875	4004747337	3796288542	2620871028	2352821924	3608631355	2378814940	2637275445	2077625674	2498046158	2331772760	1975214179	2482646636	2183290674	2431728588	2596959046	3041634077	2935617012	2392327001	2990602624	2005284406	4231974281	2497609370	2833772661	2388597695	2078795453	2729006406	1637076971
V571	HESI(+)	668.601	9.33	7.32	M+Na	DG(18:0_20:1)	DG 38:1	20826.9	0	0	0	0	0	3.55885e+06	3.68927e+06	5.68772e+06	5.23284e+06	5.89793e+06	5.13053e+06	1.2732e+07	2.09217e+06	7.83063e+06	1.98811e+07	9.42084e+06	1.40216e+07	0	0	0	0	0	0	0	3.86833e+06	3.93648e+06	2.50365e+06	2.07273e+06	2.50466e+06	1.57648e+07	4.10338e+06	1.89977e+07	1.05446e+07	1.80648e+07	2.84276e+07
V572	HESI(+)	668.62	11.17	10.15	M+NH4	DG(20:0_18:1)	DG 38:1	3.41823e+07	3.62702e+07	1.25579e+07	1.58846e+07	3.25016e+07	1.40721e+07	6.21686e+07	2.6083e+07	3.50561e+07	3.14303e+07	2.79538e+07	3.76671e+07	1.40118e+07	2.32618e+07	2.7112e+07	2.24555e+07	4.2576e+07	2.36301e+07	6.42165e+06	2.00362e+07	1.25779e+07	9.5155e+06	7.05614e+06	5.94144e+06	3.91141e+07	2.09556e+07	1.21371e+07	2.05377e+07	1.76635e+07	1.52488e+07	5.63122e+07	5.80314e+07	1.77499e+07	3.22742e+07	2.24514e+07	2.67732e+07
V573	HESI(+)	668.62	11.23	10.22	M+NH4	CE(18:1)	CE 18:1	1.77432e+08	1.56595e+08	5.86428e+07	6.49163e+07	153254057	7.49709e+07	5.08299e+07	8.93033e+06	3.3108e+07	2.97401e+07	7.61672e+07	3.56909e+07	3.44045e+06	6.55875e+06	6.90942e+06	5.2085e+06	1.13533e+07	5.02912e+06	1.72323e+07	1.8701e+07	1.24031e+07	8.70592e+06	18337122	1.77094e+07	205834994	5.72625e+06	3.46426e+06	6.66022e+06	5.72448e+06	1.49061e+07	1.36678e+07	1.37425e+07	4.1473e+06	7.53283e+06	6.2142e+06	2.54237e+07
V574	HESI(+)	669.493	4.82	4.33	M+H	SM(d16:1_16:3)	SM 32:4	3.37111e+07	3.45887e+07	3.41772e+07	3.30457e+07	3.65479e+07	3.88635e+07	3.67839e+07	3.0279e+07	3.69354e+07	3.74448e+07	4.60506e+07	3.95227e+07	4.56376e+07	3.75407e+07	4.20452e+07	3.95995e+07	4.57018e+07	4.58279e+07	2.96647e+07	2.90806e+07	2.68052e+07	3.15757e+07	3.2222e+07	2.87055e+07	3.67857e+07	2.88151e+07	2.88922e+07	4.77847e+07	3.04656e+07	3.61682e+07	3.19458e+07	4.1363e+07	3.94374e+07	3.62648e+07	3.03792e+07	4.78553e+07
V575	HESI(+)	669.539	8.95	6.84	M+H	DG(16:0_24:6)	DG 40:6	1.01828e+07	1.22128e+07	1.32322e+07	1.51328e+07	4.88214e+07	1.35986e+07	4.94132e+07	2.15157e+07	2.71302e+07	4.76841e+07	7.86551e+07	3.31907e+07	8.74994e+07	9.29547e+07	9.89844e+07	9.92975e+07	7.55303e+07	6.36968e+07	3.21576e+07	3.84866e+07	3.23229e+07	2.08177e+07	5.49506e+07	5.97044e+07	6.50592e+07	2.99698e+07	3.56047e+07	2.99472e+07	5.07949e+07	1.55385e+07	8.12043e+07	1.08764e+08	9.17295e+07	1.08022e+08	6.73034e+07	5.39671e+07
V576	HESI(+)	669.543	10.2	8.69	M+NH4	DG(18:0_20:3)	DG 38:3	8.23613e+08	8.95658e+08	7.9292e+08	9.34029e+08	1166869873	4.27388e+08	7.87176e+08	4.76613e+08	8.65776e+08	7.85882e+08	8.14833e+08	4.81597e+08	6.99286e+08	3.07476e+08	7.04596e+08	690374285	8.1581e+08	8.62728e+08	7.90489e+08	638516654	6.35764e+08	4.991e+08	7.06505e+08	8.22124e+08	3.29165e+08	7.05936e+08	6.92756e+08	7.63082e+08	6.62875e+08	3.32604e+08	1118688490	1082482251	9.80678e+08	1092721252	8.29697e+08	1218715059
V577	HESI(+)	669.543	10.45	9.1	M+Na	DG(18:0_20:3)	DG 38:3	3.95737e+08	4.35305e+08	1051628451	1135382617	6.88559e+08	2.16042e+08	7.44548e+08	2.85029e+08	5.80688e+08	7.41186e+08	1614444943	9.00703e+08	5.35164e+08	3.5427e+08	4.68574e+08	4.51239e+08	3.89808e+08	8.04944e+08	3.92651e+08	2.46724e+08	2.91139e+08	2.35793e+08	2.91452e+08	2.64016e+08	4.54831e+08	3.3979e+08	2.93587e+08	4.70916e+08	3.84581e+08	1.7715e+08	5.21105e+08	5.98721e+08	470313864	5.99779e+08	6.54084e+08	1267926102
V578	HESI(+)	669.543	10.08	8.48	M+Na	TG(P-8:0_15:2_15:0)	TG O-38:3	7.94278e+08	9.33749e+08	1045252358	1337653701	1754581529	6.6997e+08	1834200637	9.38168e+08	1884395920	1995337872	5242400552	2639047701	4169978774	2801701049	4578158041	4854250704	5586773238	4810043266	8.89672e+08	8.44909e+08	6.56324e+08	6.00321e+08	1241509809	1357442971	2169913856	1891443053	9.66734e+08	1720736962	1409462974	3.62542e+08	6506816658	6260619916	5115242556	6991044818	4485265623	1123423950
V579	HESI(+)	669.547	9.24	7.2	M+H	DG(18:1_22:5)	DG 40:6	3.583e+07	4.47904e+07	4.16859e+07	4.88598e+07	101565774	3.17477e+07	7.41881e+07	2.74367e+07	5.16554e+07	6.95281e+07	1.18352e+08	4.72479e+07	1.12546e+08	2.11321e+08	1.89154e+08	1.54075e+08	1.47146e+08	5.29153e+07	8.30098e+07	8.51833e+07	1.20472e+08	7.07872e+07	1.34968e+08	130312556	1.16463e+08	5.92531e+07	3.22042e+07	4.17678e+07	4.75584e+07	8.55159e+06	4.12894e+07	2.00143e+08	3.88328e+07	46615600	5.92325e+07	4.96572e+07
V580	HESI(+)	669.548	9.66	7.81	M+H	DG(18:0_22:6)	DG 40:6	9.43949e+07	6.66046e+07	5.33894e+07	7.10502e+07	8.91674e+07	5.24564e+07	1.06603e+08	1.05069e+08	8.30117e+07	1.00912e+08	1.5548e+08	1.02174e+08	2.17106e+08	1.74374e+08	2.39175e+08	2.63586e+08	2.94049e+08	253952798	1.22905e+08	1.0846e+08	116871216	8.71574e+07	1.49083e+08	1.19041e+08	9.18581e+07	1.51321e+08	1.87486e+08	1.65419e+08	1.05905e+08	1.1104e+08	3.57924e+08	3.82746e+08	3.7254e+08	3.53703e+08	2.16336e+08	335429693
V581	HESI(+)	671.56	9.85	8.11	M+H	TG(O-11:0_5:0_24:5)	TG O-40:5	2.56244e+06	1.85804e+06	5.13874e+06	2.6817e+06	7.37285e+06	2.65044e+06	6.49633e+06	5.26734e+06	6.47047e+06	1.76945e+07	2.87441e+07	1.09083e+07	2.83026e+07	2.68201e+07	2.70993e+07	4.79719e+07	2.68808e+07	2.69076e+07	1.29317e+07	4.16803e+06	1.36537e+07	769829	1.26681e+07	7.177e+06	1.49964e+07	1.06976e+07	3.30949e+06	4.7124e+06	5.41758e+06	8.67034e+06	4.46085e+07	5.19266e+07	3.06799e+07	6.62456e+07	2.39522e+07	2.43814e+07
V582	HESI(+)	671.56	10.63	9.38	M+Na	DG(18:1_20:1)	DG 38:2	1030488834	1128741306	1741554482	2184410191	2309907592	7.50769e+08	2585730775	8.74403e+08	2386353776	2011743990	4675058656	2563472688	3192688987	2364878083	4533221359	3942502696	4868191331	5240670060	7.42781e+08	7.96027e+08	5.01498e+08	503609556	663566872	7.16777e+08	2342643095	1919005427	9.43244e+08	2450877039	1649225460	659548870	7041489378	5940020207	4463871411	6146181518	4975218522	5735513223
V583	HESI(+)	671.56	9.78	7.99	M+H	DG(18:1_22:4)	DG 40:5	3.00018e+07	3.32129e+07	5.87558e+07	6.87412e+07	6.74547e+07	2.10064e+07	1.4183e+08	9.04456e+07	1.24439e+08	1.751e+08	2.6104e+08	1.18407e+08	2.66593e+08	2.79212e+08	3.12794e+08	3.6657e+08	2.6207e+08	2.42294e+08	7.08264e+07	5.51118e+07	7.16593e+07	2.72702e+07	7.90729e+07	6.43261e+07	1.31095e+08	1.4586e+08	1.01605e+08	1.22512e+08	1.01212e+08	6.30056e+07	2.96021e+08	3.78272e+08	2.71699e+08	4.01708e+08	200464347	1.89453e+08
V584	HESI(+)	672.556	8.98	6.88	M+NH4	DG(17:0_22:6)	DG 39:6	2.15996e+06	4.50792e+06	4.61608e+06	2.26739e+06	6.58502e+06	4.78924e+06	4.38377e+06	2.67516e+06	4.15365e+06	4.24562e+06	6.7048e+06	1.67964e+06	5.04667e+06	5.23628e+06	7.21739e+06	8.99938e+06	9.3231e+06	5.7142e+06	1.67186e+07	1.47774e+07	1.50354e+07	8.86323e+06	1.66841e+07	1.30205e+07	5.87793e+06	2.59293e+06	6.23148e+06	4.34381e+06	6.3809e+06	687363	7.5066e+06	8.86167e+06	4.80848e+06	1.35407e+07	4.85597e+06	6.72123e+06
V585	HESI(+)	672.556	9.26	7.23	M+NH4	DG(18:1_21:5)	DG 39:6	3.43572e+07	2.77936e+07	2.44448e+07	3.49268e+07	4.22921e+07	2.56468e+07	1.25581e+07	2.22752e+07	1.48776e+07	1.56291e+07	2.7791e+07	1.9992e+07	9.31447e+07	7.6349e+07	6.8448e+07	1.0791e+08	7.42582e+07	7.17512e+07	3.29587e+07	4.01805e+07	4.83679e+07	4.71853e+07	8.8934e+07	5.56511e+07	2.9342e+07	4.26194e+07	3.26653e+07	3.63938e+07	2.42286e+07	2.66194e+07	107648954	9.64886e+07	1.28676e+08	180308005	4.18981e+07	31778673
V586	HESI(+)	673.466	5.58	4.72	M+H	MePC(27:3)	MePC 27:3	1.11888e+08	1.55626e+08	1.18993e+08	1.19088e+08	7.00926e+07	1.68359e+08	220319881	3.70087e+08	8.5105e+07	7.48494e+07	3.71919e+07	2.32788e+08	2.01416e+07	2.83631e+06	3.71549e+06	2.12524e+07	732908	2.03206e+06	1.77182e+08	2.66167e+08	1.90489e+08	1.66798e+08	3.34798e+08	1.23428e+08	2.56527e+07	2.83799e+08	4.25217e+08	2.93682e+08	5.44698e+08	2.35411e+08	3.48233e+06	2.66094e+06	154099	1.35376e+07	6332.15	0
V587	HESI(+)	673.466	5.76	4.81	M+Na	DG(17:2_22:6)	DG 39:8	3.51921e+07	7.6838e+07	5.09956e+07	3.80956e+07	2.89004e+07	5.98322e+07	8.62822e+07	1.28827e+08	2.08195e+07	2.21277e+07	1.00161e+07	9.6295e+07	1.04863e+07	875745	1.17651e+06	6.01798e+06	0	571380	9.23303e+07	1.19445e+08	9.33554e+07	3.15043e+07	1.42201e+08	6.21999e+07	7.76403e+06	134888953	2.02652e+08	1.38991e+08	2.31184e+08	4.47129e+07	465053	135500	1.18913e+06	1.84233e+07	1.44445e+06	7607.48
V588	HESI(+)	673.577	10.33	8.9	M+H	TG(P-4:0_22:3_14:0)	TG O-40:4	714133	579261	2.67076e+06	3.21989e+06	744450	449559	7.35634e+06	2.88498e+06	5.00173e+06	6.98633e+06	1.85825e+07	9.05964e+06	2.57997e+07	1.12304e+07	8.18182e+07	8.66602e+07	6.70892e+07	1.17607e+08	582583	711265	690351	579263	761246	1.02046e+06	5.22414e+06	2.03375e+06	1.78256e+06	6.51194e+06	2.11951e+06	1.07261e+06	1.38026e+08	1.47716e+08	7.77607e+07	1.57185e+08	9.84671e+07	1.24214e+08
V589	HESI(+)	674.573	9.62	7.74	M+NH4	DG(18:1_21:4)	DG 39:5	1.56085e+07	1.37507e+07	2.92632e+07	3.14753e+07	4.856e+07	8.92597e+06	2.93758e+07	2.87817e+07	2.44289e+07	2.63487e+07	3.81556e+07	2.97871e+07	1.58512e+07	7.48047e+06	9.27447e+06	1.19779e+07	9.47741e+06	1.02421e+07	1.73923e+07	1.34112e+07	1.126e+07	1.04037e+07	1.77223e+07	1.45001e+07	1.07758e+07	2.98116e+07	2.38185e+07	1.75805e+07	2.44576e+07	1.5752e+07	9.76093e+06	1.11854e+07	2.5074e+07	2.69158e+07	9.06533e+06	7.15222e+06
V590	HESI(+)	675.543	5.93	4.89	M+H	SM(d18:1_14:0)	SM 32:1	8.09752e+07	4.189e+07	1.34178e+08	1.14037e+08	7.56895e+07	6.5825e+07	153345035	2.68109e+08	1.69843e+08	1.2683e+08	9.92385e+07	1.45864e+08	1.78701e+08	1.31619e+08	1.04135e+08	9.31986e+07	57838513	1.2265e+08	1.69919e+08	1.68762e+08	1.8278e+08	2.16866e+08	1.48126e+08	1.02086e+08	7.86765e+07	1.82195e+08	2.6256e+08	2.15722e+08	273951781	2.36374e+08	1.08539e+08	1.14879e+08	1.87219e+08	1.89432e+08	1.19769e+08	2.84037e+08
V591	HESI(+)	676.585	9.97	8.31	M+NH4	DG(19:0_20:4)	DG 39:4	1.15018e+07	1.40394e+07	1.10953e+07	1.91532e+07	1.6792e+07	2.86577e+06	1.53188e+07	1.43173e+07	1.45789e+07	1.89325e+07	2.82806e+07	1.10183e+07	9.29182e+06	2.8636e+06	1.72094e+07	1.97021e+07	1.01426e+07	2.84866e+07	1.40116e+06	3.4795e+06	391621	2.13193e+06	9.97503e+06	4.43446e+06	2.53104e+07	5.60674e+06	9.4835e+06	3122526	3.48261e+06	2.81357e+06	3.25427e+07	3.5971e+07	1.62984e+07	3.3249e+07	1.75875e+07	1.61489e+06
V592	HESI(+)	677.473	5.52	4.7	M+H	PG(O-7:0_23:2)	PG O-30:2	5.21774e+07	5.29074e+07	4.21014e+07	3.87631e+07	3.57696e+07	1.23157e+08	4.24201e+07	8.14869e+07	3.94596e+07	3.10691e+07	1.85989e+07	7.71379e+07	4.41164e+06	761539	1.09461e+06	6.66357e+06	43707.9	1.28855e+06	9.08891e+07	8.29213e+07	8.40637e+07	8.63957e+07	9.08984e+07	4.59354e+07	1.67327e+07	4.279e+07	6.33734e+07	8.038e+07	1.10496e+08	5.86055e+07	480616	412662	35017.4	6.29272e+06	439626	3053.72
V593	HESI(+)	678.508	5.98	4.9	M+H	PC(13:0_15:0)	PC 28:0	4.72171e+07	4.18486e+07	9.67549e+07	1.05343e+08	3.7688e+07	6.71239e+07	1.43398e+07	1.33072e+07	1.41953e+07	1.96215e+07	4.74561e+06	1.83023e+07	1.56182e+07	1.72198e+07	4.87803e+06	4.17368e+06	5.93721e+06	5.28273e+06	5.96009e+07	4.05108e+07	5.64429e+07	7.05867e+07	3.38729e+07	2.4923e+07	2.7716e+07	2.16945e+07	1.23725e+07	3.15457e+07	4.71208e+07	6.72767e+07	1.36578e+07	1.53014e+07	1.4493e+07	3.68231e+07	2.88745e+07	2.98951e+07
V594	HESI(+)	679.49	4.7	4.25	M+H	PG(O-7:0_23:1)	PG O-30:1	1.81917e+08	202403599	3.07387e+08	2.02357e+08	1.4569e+08	4.44627e+08	3.27528e+08	348886750	4.17146e+07	5.53689e+07	3.17146e+07	3.58663e+08	2.9587e+07	214849	614954	4.33817e+06	1.30372e+06	1.58767e+06	2.42455e+08	2.90317e+08	2.8149e+08	2.52331e+08	4.95109e+08	1.14028e+08	3.89669e+06	3.96597e+08	4.59069e+08	4.33057e+08	6.81332e+08	2.80184e+08	24066.4	28297.2	23539.5	2.58351e+06	149257	151800
V595	HESI(+)	680.525	7.62	5.7	M+Na	DG(18:3_22:6)	DG 40:9	0	0	0	0	8.08339e+06	32829.4	2.1215e+06	0	0	1.45115e+06	1.34355e+06	1.53709e+06	1.47756e+06	1.09452e+07	8.46658e+06	4.2725e+06	2.83525e+06	0	6.22533e+06	7.34956e+06	1.53612e+07	2.36238e+06	1.60174e+07	1.13214e+07	1.06518e+07	0	0	0	0	0	2.20514e+06	6.06573e+06	0	6.47909e+06	0	0
V596	HESI(+)	680.583	10.47	9.14	M+NH4	TG(2:0_18:1_18:1)	TG 38:2	3.12614e+08	6.08416e+06	6.67078e+06	1.35995e+07	6.61851e+06	2.10786e+07	2.74982e+07	8.05795e+06	5.13478e+07	6.50606e+06	1.10335e+07	5.20323e+07	2.46184e+07	1.80186e+07	2.05357e+07	1.60932e+07	3.89091e+07	1.43207e+07	8.36668e+06	2.84321e+06	3.86647e+06	3.46208e+06	4.65294e+06	7.71442e+06	3.22287e+06	3.03479e+07	3.60263e+06	1.2815e+07	12342844	2.77581e+07	7.67591e+07	5.53164e+07	2.81179e+07	8.38467e+07	9.02613e+07	1.9838e+07
V597	HESI(+)	681.507	3.23	3.09	M+Na	TG(9:0_18:4_11:0)	TG 38:4	1.62623e+07	2.98441e+07	4.37567e+07	2.97059e+07	1.71698e+07	2.91577e+07	3.5801e+07	6.17884e+07	9.86607e+06	1.28138e+07	9.10263e+06	4.20694e+07	4.93242e+06	965635	769046	6.05958e+06	619463	1.18816e+06	3.63856e+07	5.37959e+07	4.93271e+07	3.90033e+07	7.59863e+07	2.35332e+07	3.83967e+06	6.14518e+07	1.07075e+08	7.55742e+07	8.93275e+07	6.15138e+07	551352	453352	303417	9.56482e+06	813394	1.07369e+06
V598	HESI(+)	681.54	5.74	4.8	M+NH4	DG(17:0_22:4)	DG 39:4	1.53682e+06	3.73795e+06	6.70635e+06	9.45919e+06	1.03085e+07	3.90709e+06	4.71446e+06	1.57589e+06	4.09337e+06	9.70211e+06	1.60256e+07	4.0542e+06	3.62745e+06	2.69814e+06	3.39549e+06	5.03532e+06	9.14536e+06	2.69552e+06	1.41036e+07	3.94036e+06	1.45422e+07	7.72189e+06	2.81851e+06	3.61244e+06	4.01543e+06	2.91507e+06	7.08705e+06	3.22923e+06	2.34352e+06	0	1.19921e+06	5.49533e+06	4.6673e+06	2.40646e+06	926808	41929
V599	HESI(+)	682.541	8.69	6.56	M+NH4	DG(18:2_22:6)	DG 40:8	8.80727e+06	9.09749e+06	2.24645e+07	2.30421e+07	6.85425e+07	10507272	4.05052e+07	2.73665e+07	3.21997e+07	5.38464e+07	8.40423e+07	2.54125e+07	158555995	1.17677e+08	7.73457e+07	1.68803e+08	5.5385e+07	5.29624e+07	3.56578e+07	3.71322e+07	5.45599e+07	1.51468e+07	7.99682e+07	6.98099e+07	9.03015e+07	1.761e+07	2.15682e+07	1.48439e+07	2.2008e+07	3.9804e+06	4.54869e+07	3.67719e+07	6.53068e+07	9.70775e+07	5.06612e+07	1.22995e+07
V600	HESI(+)	682.543	8.75	6.62	M+NH4	TG(O-16:1_2:0_22:7)	TG O-40:8	902695	513802	1.38186e+07	1.59803e+06	5.80208e+06	6.04683e+06	2.28974e+06	2.27476e+06	2.61202e+06	5.67948e+06	5.29602e+07	1.53711e+07	9.39924e+07	6.80133e+07	8.6897e+06	2.18133e+07	3.34357e+07	3.15481e+07	4.22327e+06	1.81081e+06	1.70597e+06	239992	4.13203e+06	7.08078e+06	7.70741e+06	1.08822e+06	1.01761e+06	1.44436e+06	999503	2.31868e+06	4.23494e+06	1.44626e+06	5.69397e+06	9.778e+06	3.09267e+07	7.39103e+06
V601	HESI(+)	682.545	10.3	8.86	M+NH4	TG(O-12:1_6:0_22:7)	TG O-40:8	7.7159e+07	7.43015e+07	4.80808e+07	5.95888e+07	1.52384e+08	3.18209e+07	2.22265e+07	1.93107e+07	2.73754e+07	3.63514e+07	56296661	2.13439e+07	1.00373e+07	1.00138e+07	9.06267e+06	1.253e+07	1.046e+07	7.61502e+06	2.20429e+07	1.87102e+07	2.21178e+07	1.64224e+07	3.47168e+07	3.6226e+07	1.45646e+07	1.10895e+07	1.19472e+07	1.22161e+07	9.56677e+06	1.14473e+07	6.17623e+06	5.59358e+06	1.40713e+07	9.81776e+06	7.30065e+06	5.23207e+06
V602	HESI(+)	682.6	11	9.93	M+NH4	TG(4:0_16:0_18:1)	TG 38:1	1.5607e+08	5.04615e+06	1.20559e+07	1.68081e+07	8.4367e+06	1.12023e+07	5.22954e+06	1.56466e+07	1.14256e+07	8.11849e+06	6.35345e+06	1.04289e+07	1.09946e+07	3.82299e+06	1.39316e+07	1.07222e+07	3.12954e+07	1.32319e+07	5.54667e+06	4.84453e+06	7.17368e+06	1.03958e+07	8.33535e+06	3.81238e+06	3.72618e+06	1.07443e+07	6.21925e+06	1.30024e+07	1.87445e+07	6.98422e+06	3.12266e+07	2.82073e+07	1.92939e+07	3.55494e+07	4.0278e+07	9.96737e+06
V603	HESI(+)	683.504	9.91	8.21	M+Na	DG(P-25:8_16:1)	DG O-41:10	1.96947e+08	1.8325e+08	1.63326e+08	1.3461e+08	1.84839e+08	1.12578e+08	1.63806e+08	1.57699e+08	1.73901e+08	1.81408e+08	1.8869e+08	1.3941e+08	1.77475e+08	1.27002e+08	8.66506e+07	1.0162e+08	6.46126e+07	1.27334e+08	1.44758e+08	1.21434e+08	1.64517e+08	9.74072e+07	1.39281e+08	1.50611e+08	1.5555e+08	1.96013e+08	1.90094e+08	1.82521e+08	1.3992e+08	1.38951e+08	4.25445e+07	7.58204e+07	1.26915e+08	7.5619e+07	1.69679e+08	4.76209e+07
V604	HESI(+)	684.554	9.03	6.94	M+NH4	DG(18:1_22:6)	DG 40:7	2.8051e+08	3.26206e+08	3.40613e+08	3.87534e+08	1180435744	2.82136e+08	1103228601	5.32011e+08	5.94969e+08	9.41887e+08	1539097617	6.05783e+08	2757869161	2384623040	1887494272	3174255373	1615578144	11509151271	8.67288e+08	1120765213	1102373444	4.5683e+08	1231317916	1071213324	1275753424	6.65313e+08	8.0737e+08	7.14588e+08	9.21296e+08	2.93185e+08	2953623606	3628573355	1930313254	3011896884	12040347459	8427162741
V605	HESI(+)	684.555	8.67	6.55	M+NH4	DG(18:2_22:5)	DG 40:7	1.41051e+07	1.46118e+07	4.09372e+07	3.94084e+07	3.91177e+07	1.69892e+07	1.38203e+07	6.09464e+06	1.17717e+07	2.36791e+07	4.1718e+07	1.08213e+07	2.8657e+07	3.64041e+07	2.49628e+07	3.9385e+07	3.54118e+07	1.9542e+07	3.22529e+07	2.57286e+07	3.29079e+07	2.47697e+07	6.35541e+07	4.95346e+07	3.63609e+07	6771746	7.69328e+06	1.02188e+07	1.18458e+07	1.48737e+07	3.16192e+07	2.91026e+07	2.85984e+07	6.61993e+07	2.71034e+07	1.95598e+06
V606	HESI(+)	684.558	8.97	6.87	M+NH4	DG(20:3_20:4)	DG 40:7	1946338119	2511180591	2990965790	3504679380	8253832985	2243628408	8710792582	4655663606	5390579989	8860583545	14109797498	6479825122	17397727992	18026703270	17873564439	19515913585	14698111496	11983358490	7057005620	7705199408	7737083702	4463000485	11206825806	11063967512	10846437556	6877334985	6510767294	5608985240	9907043233	2480664486	15228631838	20453729950	17116037952	19224158262	12936662626	10195745266
V607	HESI(+)	684.558	9.42	7.45	M+NH4	TG(P-18:0_2:0_20:6)	TG O-40:7	1.50417e+07	3.10391e+07	1.37727e+07	4.30355e+07	3.48464e+07	1.41364e+07	2.7568e+07	2.15816e+07	7.28285e+07	4.30995e+07	1.8319e+08	2.95822e+07	8.83107e+07	9.18278e+07	8.88175e+07	1.00131e+08	149972160	6.64655e+07	1.12898e+08	2.46088e+07	7.05445e+07	2.1648e+07	1.4059e+08	1.66613e+08	3.5749e+07	2.91437e+07	3.74922e+07	8.04035e+07	3.35044e+07	1.94522e+07	5.61908e+07	3.80109e+08	1.91408e+08	282386483	2.40044e+08	5.86221e+07
V608	HESI(+)	684.558	9.28	7.26	M+NH4	TG(O-13:1_5:0_22:6)	TG O-40:7	4.28374e+07	5.18483e+07	8.61634e+07	8.3704e+07	1.95891e+08	4.43895e+07	2.38374e+08	1.47075e+08	1.18564e+08	3.10709e+08	3.16716e+08	192773965	6.01677e+08	7.41048e+08	5.21775e+08	6.74064e+08	2.48671e+08	4.31418e+08	1.11701e+08	1.88978e+08	1.56684e+08	1.43836e+08	1.86834e+08	1.66325e+08	3.18593e+08	1.82105e+08	1.11402e+08	9.60317e+07	2.45003e+08	3.54156e+07	3.79119e+08	3.44866e+08	3.31403e+08	3.13175e+08	2.49895e+08	3.12558e+08
V609	HESI(+)	684.613	11.53	10.58	M+NH4	TG(6:0_16:0_16:0)	TG 38:0	3.45515e+07	694938	3.30689e+06	4.26074e+06	1.47659e+06	3.69157e+06	3.91237e+06	3.31623e+06	535289	190526	287968	579624	660778	2.3449e+06	784107	3.18945e+06	4.31333e+06	1.78788e+06	224949	779963	2.23187e+06	772868	1.55311e+06	142960	688346	2.96345e+06	3.75576e+06	3.16783e+06	5.42527e+06	5.39923e+06	5.08996e+06	3.75966e+06	2.7302e+06	4.99656e+06	1.7133e+06	1.39505e+06
V610	HESI(+)	685.54	10.47	9.13	M+Na	TG(2:0_18:1_18:1)	TG 38:2	1.19914e+08	9.5435e+06	7.94329e+06	7.86251e+06	7.21918e+06	1.44174e+07	4.97072e+06	1.04174e+07	9.04625e+06	7.72553e+06	5.3851e+06	1.16119e+07	8.28986e+06	6.26807e+06	8.7692e+06	4.47227e+06	1.28836e+07	5.08792e+06	3.57533e+06	3.47175e+06	3.80926e+06	6.03397e+06	8.96199e+06	5.34149e+06	2.23115e+06	1.06346e+07	8.2996e+06	5.07108e+06	6.63708e+06	949434	1.75426e+07	1.53357e+07	1.0443e+07	1.46698e+07	2.93422e+07	3.4714e+06
V611	HESI(+)	686.571	9.74	7.93	M+H	NAGly(19:0_22:4)	NAGly 41:4	1.62938e+08	1.29313e+08	1.2627e+08	1.09805e+08	1.32362e+08	1.41795e+08	2.05135e+08	1.9153e+08	1.16492e+08	1.97705e+08	2.35264e+08	2.10788e+08	3.37099e+08	2.83902e+08	2.79333e+08	5.06059e+08	4.01367e+08	3.84152e+08	3.74684e+08	2.66867e+08	2.62625e+08	1.33975e+08	314249849	2.22223e+08	1.47413e+08	2.84934e+08	3.33411e+08	2.60615e+08	1.87386e+08	2.11777e+08	5.3908e+08	7.76127e+08	4.67192e+08	6.36254e+08	3.40072e+08	6.2086e+08
V612	HESI(+)	686.571	9.54	7.61	M+NH4	TG(O-13:1_5:0_22:5)	TG O-40:6	1.66166e+08	1.54322e+08	3.89648e+08	5.26017e+08	3.20423e+08	5.97177e+07	1158734891	5.55939e+08	9.54973e+08	2103751183	3376698158	1117092870	1583833619	1613561693	1555590618	2956718909	1654551885	2368141614	118515334	1.15405e+08	1.28601e+08	8.10943e+07	1.65204e+08	1.54807e+08	1487014611	4.6358e+08	4.22918e+08	6.15862e+08	6.78556e+08	2.9143e+08	2076181917	2301642346	1772093255	2354372462	1899576130	2986515049
V613	HESI(+)	686.571	9.67	7.81	M+NH4	DG(18:0_22:6)	DG 40:6	1451255798	1301986006	9.74607e+08	1279914398	1539795675	1087015832	1678097096	2354964142	1446641541	1599984247	1874894007	1708206811	4228152058	3579530684	4629478215	4751682835	5422653660	3958177434	2928382783	2665093364	2693524702	2110760584	3438910301	2760045841	1364749572	3269282851	3278036567	3506514972	2170531120	2175690336	6545179599	7113658706	7299575638	6257816363	3415827482	5073725360
V614	HESI(+)	686.571	9.3	7.28	M+Na	DG(18:2_22:4)	DG 40:6	7.37648e+07	7.67582e+07	8.96143e+07	9.63783e+07	1.68302e+08	5.65099e+07	1.32833e+08	1.39675e+08	9.48454e+07	1.35478e+08	1.87181e+08	1.18221e+08	365231394	4.51787e+08	3.62102e+08	4.59859e+08	3.06743e+08	6.13191e+08	8.2072e+08	1.5246e+08	2.17064e+08	1.4155e+08	282411220	1.93736e+08	1.66876e+08	1.32722e+08	1.02041e+08	4.42052e+08	9.94522e+07	1.54632e+08	6.1228e+08	3.84035e+08	5.01441e+08	1780437227	2.45458e+08	3.65092e+08
V615	HESI(+)	686.572	9.24	7.2	M+NH4	DG(18:1_22:5)	DG 40:6	5.57387e+08	6.32691e+08	5.27391e+08	6.45791e+08	1200024942	4.44081e+08	9.79682e+08	4.37708e+08	707027291	1078875058	1496549685	6.03941e+08	1775116893	2587845672	2092646067	2490089893	1674635849	759212100	1083429940	1138224069	1539261827	9.14056e+08	1954786593	1679516651	1369378861	8.01293e+08	5.88973e+08	6.1042e+08	6.22496e+08	2.02143e+08	8.8174e+08	1865626058	9.30109e+08	5.70952e+08	1100012419	4.77089e+08
V616	HESI(+)	686.583	10.78	9.62	M+NH4	WE(O-21:5_26:6)	WE O-47:11	6.27952e+07	6.81579e+07	6.71759e+07	8.87859e+07	7.76639e+07	5.69212e+07	8.02184e+07	7.69656e+07	1.02415e+08	9.27534e+07	1.35151e+08	7.9792e+07	8.85043e+07	8.46621e+07	9.64068e+07	1.03956e+08	9.56858e+07	1.08728e+08	7.8202e+07	6.20867e+07	5.93536e+07	5.25591e+07	5.62158e+07	75858854	7.90457e+07	6.16189e+07	6.46869e+07	8.52016e+07	5.49688e+07	8.76666e+07	9.77673e+07	1.0303e+08	9.70378e+07	1.01379e+08	1.06596e+08	8.03929e+07
V617	HESI(+)	687.497	8.36	6.25	M+NH4	DG(18:4_22:4)	DG 40:8	0	0	0	0	7.49544e+06	1.4786e+06	0	3.07915e+06	0	7.86749e+06	173235	0	4.49008e+06	4.81117e+06	0	1.42931e+06	2.28511e+06	0	8.92546e+06	1.93551e+07	1.49139e+07	1.36419e+06	3.29492e+07	2.39672e+07	1.21931e+06	1.67357e+06	0	149596	0	0	3.11468e+06	0	0	7.30727e+06	0	0
V618	HESI(+)	687.498	8.69	6.57	M+Na	DG(18:2_22:6)	DG 40:8	0	0	6.87244e+06	4.17789e+06	1.50751e+07	0	3.06418e+06	1.27921e+06	1.0321e+06	1.04015e+07	2.19056e+07	3.58237e+06	5.27677e+07	4.22509e+07	2.26654e+07	6.95852e+07	2.29073e+07	1.83667e+07	1.87065e+06	4.35209e+06	8.07248e+06	0	1.38036e+07	1.33095e+07	1.1235e+07	0	3.38975e+06	0	2.78659e+06	0	8.59689e+06	1.31883e+06	1.61703e+07	2.24626e+07	2.07988e+07	0
V619	HESI(+)	687.553	11	9.93	M+Na	TG(4:0_16:0_18:1)	TG 38:1	7.19204e+07	2.91851e+06	6.07972e+06	9.31211e+06	4.08443e+06	5.33817e+06	1.94422e+06	588416	802952	646584	2.06966e+06	7.51965e+06	4.62081e+06	1.43461e+06	5.99212e+06	3.70843e+06	1.56602e+07	5.0516e+06	3.63882e+06	2.00122e+06	3.88199e+06	5.81623e+06	4.47022e+06	2.79624e+06	1.45789e+06	9.04961e+06	3.12234e+06	8.82045e+06	7.71118e+06	923709	1.32478e+07	1.23114e+07	6.40217e+06	1.56625e+07	19293839	3.34561e+06
V620	HESI(+)	688.571	11.61	10.67	M+NH4	DG(18:1_22:4)	DG 40:5	193861	4007.13	7.50999e+06	1.50938e+07	351441	312.41	1.60735e+07	2.01811e+07	2.07315e+07	1.13005e+07	7.39351e+06	9.72678e+06	3.75163e+06	2.63969e+07	1.87987e+06	5.23139e+06	170520	3.12953e+06	509801	2.36748e+06	267253	629801	256762	1.89638e+06	0	4.28042e+06	6.99501e+06	1.86275e+06	4.74434e+06	1.04987e+07	0	1.30508e+06	212239	248246	58169.7	434199
V621	HESI(+)	688.585	9.85	8.11	M+NH4	TG(O-11:0_5:0_24:5)	TG O-40:5	4.59451e+07	4.19646e+07	8.99026e+07	9.45551e+07	5.39288e+07	5.08514e+07	1.4093e+08	1.24912e+08	121476551	2.47567e+08	3.44498e+08	1.7685e+08	2.62458e+08	3.30123e+08	2.86536e+08	4.58769e+08	2.704e+08	2.49533e+08	1.20949e+08	8.81022e+07	1.85874e+08	3.24887e+07	2.63848e+08	1.29817e+08	2.21873e+08	1.64018e+08	94186364	1.00596e+08	1.19263e+08	1.15166e+08	368090878	5.13726e+08	2.5245e+08	4.94925e+08	2.18815e+08	2.7181e+08
V622	HESI(+)	688.589	9.78	7.99	M+NH4	DG(18:1_22:4)	DG 40:5	3.17599e+08	315565899	799984724	9.65274e+08	8.47162e+08	2.5729e+08	1818455871	1445329537	1646973175	2240938313	3382923224	1557911828	3006606821	3398061942	3661650190	4108944878	3253537068	2789159615	7.08637e+08	6.17017e+08	655330337	4.1199e+08	792477152	9.82653e+08	1969993217	1883863557	1427100035	1676217760	1356334521	8.02134e+08	3417696515	4474618511	3042550837	4038141792	2271897982	2480029983
V623	HESI(+)	688.589	9.91	8.21	M+NH4	DG(20:1_20:4)	DG 40:5	2.80231e+08	2.55941e+08	3.2905e+07	3.84483e+07	2.57622e+08	9.94204e+07	5.41814e+07	4.35452e+07	3.93857e+07	4.243e+07	4.93438e+07	2.92407e+07	1.39696e+08	181870846	1.82918e+08	2.11669e+08	1.42279e+08	1.55465e+08	1.84702e+08	1.72353e+08	1.91343e+08	1.35272e+08	2.79863e+08	8.60954e+07	133170665	4.58314e+07	3.37635e+07	3.12224e+07	2.59924e+07	2.05468e+07	2.34252e+08	2.52293e+08	1.46444e+08	2.40902e+08	1.13289e+08	1.01429e+08
V624	HESI(+)	688.589	10.19	8.67	M+NH4	DG(18:0_22:5)	DG 40:5	4.19387e+07	4.27821e+07	7.26401e+07	9.69368e+07	6.0585e+07	2.37338e+07	1.38949e+08	1.15747e+08	1.32522e+08	1.69506e+08	3.09552e+08	1.73966e+08	178341992	1.63542e+08	1.88941e+08	2.55192e+08	1.96934e+08	3.33641e+08	3.45075e+07	3.25548e+07	3.5483e+07	2.07815e+07	3.23461e+07	3.05293e+07	9.2899e+07	9.38452e+07	9.14848e+07	1.33083e+08	7.68001e+07	8.40227e+07	2.55035e+08	3.35891e+08	355297596	3.353e+08	2.05882e+08	5.31695e+08
V625	HESI(+)	688.622	10.42	9.05	M+NH4	DG(P-19:4_22:0)	DG O-41:5	1.42142e+08	1.2231e+08	9.33491e+07	1.03089e+08	1.07006e+08	8.32207e+07	5.35207e+07	4.20397e+07	4.79728e+07	5.66693e+07	5.73925e+07	4.81887e+07	3.81406e+07	4.90567e+07	4.30924e+07	4.10272e+07	3.57342e+07	4.17789e+07	7.62505e+07	6.68918e+07	6.94327e+07	6.60607e+07	7.9796e+07	8.40151e+07	6.17639e+07	2.72306e+07	2.41016e+07	3.94232e+07	3.04712e+07	4.11886e+07	2.90837e+07	3.07882e+07	2.99309e+07	3.26958e+07	4.15736e+07	2.1719e+07
V626	HESI(+)	689.511	8.97	6.87	M+Na	DG(18:1_22:6)	DG 40:7	8.31761e+08	1062621677	1296952521	1384815770	3055853097	9.4516e+08	2657978977	1430811333	2153425593	3488410559	5072527463	2383925851	7954479703	7499527378	7326659050	8054174613	6422092088	5707260538	2935455139	2653441565	2845963817	1820650706	3564578795	4107213780	5017280166	1775066657	1839556301	1882795200	2556813401	915361140	5826346613	7036437714	6903106241	7695397407	6506017910	4380293656
V627	HESI(+)	689.558	6.5	5.13	M+H	SM(d16:1_17:0)	SM 33:1	2.16709e+08	1.56465e+08	2.573e+08	304644388	2.13107e+08	1.72044e+08	1.89904e+08	4.15379e+08	2.49847e+08	2.23528e+08	1.20733e+08	2.38533e+08	2.35328e+08	2.78723e+08	2.13588e+08	2.73311e+08	1.33969e+08	1.98401e+08	3.74336e+08	5.75004e+08	5.91968e+08	6.37134e+08	4.71282e+08	3.6538e+08	1.93922e+08	2.77862e+08	4.89601e+08	3.25084e+08	402839966	3.11978e+08	1.86101e+08	1.60511e+08	3.05408e+08	3.89949e+08	173532621	1.05361e+08
V628	HESI(+)	690.585	9.78	7.99	M+NH4	DG(18:0_22:4)	DG 40:4	2.28568e+07	2.73448e+07	5.02584e+07	7.04367e+07	5.44192e+07	1.46593e+07	1.36039e+08	9.93231e+07	1.26246e+08	1.65804e+08	2.49917e+08	1.09296e+08	2.06069e+08	2.53583e+08	2.61919e+08	3.02789e+08	215400364	184875302	5.9624e+07	4.33115e+07	5.78935e+07	3.21077e+07	6.7567e+07	7.56888e+07	1.27045e+08	1.37399e+08	8.68059e+07	1.07195e+08	9.07816e+07	5.97726e+07	2.38011e+08	3.17547e+08	2.24182e+08	2.99824e+08	1.55044e+08	1.57914e+08
V629	HESI(+)	690.602	10.41	9.03	M+NH4	DG(20:0_20:4)	DG 40:4	1.91233e+08	183818423	3.41973e+08	447591393	223864933	8.5718e+07	7.96166e+08	5.93642e+08	7.34062e+08	7.7878e+08	1428560495	7.87525e+08	1.69436e+08	6.95034e+08	1.90144e+08	1.98494e+08	1.48792e+08	2.41372e+08	2.1392e+08	2.24975e+08	1.94882e+08	1.49678e+08	1.52953e+08	1.97888e+08	6.14468e+08	6.63238e+08	4.12942e+08	5.17581e+08	4.0691e+08	2.65703e+08	2.60197e+08	2.82806e+08	1.62164e+08	273041587	1.82402e+08	2.24381e+08
V630	HESI(+)	690.602	10.64	9.41	M+NH4	DG(20:0_20:4)	DG 40:4	2.53942e+08	2.62263e+08	8.35138e+07	107431074	3.0558e+08	1.13963e+08	1.09153e+08	3.80629e+07	4.63235e+07	6.5284e+07	1.42591e+08	4.16471e+07	1.26744e+07	2.12973e+07	3.11018e+07	2.94396e+07	2.50363e+07	1.88988e+07	1.79349e+07	1.98892e+07	1.38411e+07	1.05038e+07	2.26446e+07	2.14329e+07	1.01795e+08	2.96882e+07	1.95706e+07	1.71399e+07	2.65715e+07	1.89425e+07	1.60254e+07	1.92624e+07	1.3069e+07	1.7733e+07	1.77697e+07	2.27088e+07
V631	HESI(+)	690.603	10.33	8.9	M+NH4	DG(18:1_22:3)	DG 40:4	1.45968e+07	1.30217e+07	5.98376e+07	7.70114e+07	1.91854e+07	7.71174e+06	1.42664e+08	7.82524e+07	1.2844e+08	1.55274e+08	3.14539e+08	1.91388e+08	8.14112e+08	1.69589e+08	9.92561e+08	1050815708	8.5323e+08	1377745617	2.24763e+07	2.43679e+07	2.16402e+07	1.80204e+07	2.55863e+07	2.77735e+07	1.14678e+08	9.66781e+07	6.7589e+07	1.07471e+08	7.87152e+07	2.67036e+07	1704050490	1805519197	9.69607e+08	1710774928	1221714887	1611369685
V632	HESI(+)	690.603	10.19	8.68	M+NH4	TG(O-12:1_6:0_22:3)	TG O-40:4	1.00283e+08	9.582e+07	2.7046e+07	3.82332e+07	1.42321e+08	6.5276e+07	4.76503e+07	2.11366e+07	3.77259e+07	3.99262e+07	1.12434e+08	3.73359e+07	7.84255e+07	4.2062e+07	7.40548e+07	8.66137e+07	9.25517e+07	8.60413e+07	1.01594e+07	10760294	8.77379e+06	7.12289e+06	3.00817e+07	3.63163e+07	5.21215e+07	3.08077e+07	1.85859e+07	2.77062e+07	2.52231e+07	9.12999e+06	1.06177e+08	1.43955e+08	9.25724e+07	1.72516e+08	7.57028e+07	65031954
V633	HESI(+)	690.603	10.47	9.13	M+NH4	DG(18:0_22:4)	DG 40:4	4.2828e+07	3.14369e+07	3.93434e+07	4.68418e+07	3.43414e+07	1.3913e+07	8.12919e+07	9.04432e+07	7.58297e+07	1.02292e+08	1.37814e+08	9.53113e+07	7.74324e+07	8.81953e+07	8.4092e+07	8.6504e+07	5.17352e+07	8.9533e+07	2.01982e+08	2.1206e+08	2.29988e+07	1.74539e+07	1.43387e+08	2.56195e+07	6.56008e+07	621826227	5.95619e+07	4.64503e+07	4.2058e+07	2.53321e+08	103948740	1.08259e+08	5.57104e+07	1.0239e+08	70257203	8.0398e+07
V634	HESI(+)	690.604	9.57	7.66	M+NH4	CE(20:4)	CE 20:4	1.69628e+06	4.82952e+06	792358	5.27181e+06	4.49933e+06	868485	1.38683e+07	1.56993e+06	8.84658e+06	3.37885e+06	6.98043e+06	2.98504e+06	7.1451e+06	1.96357e+06	1.34982e+07	7.37805e+06	1.83783e+07	3.43768e+06	6.53859e+06	6.09127e+06	2.20909e+06	1.16854e+06	1.17007e+07	3.65278e+06	8.77816e+06	9.70213e+06	7.95336e+06	3.38094e+06	6.08643e+06	1532.98	1.51608e+07	1.18783e+07	8.70101e+06	1.28906e+07	9.47551e+06	778293
V635	HESI(+)	690.62	13.03	11.86	M+NH4	CE(20:4)-2	CE 20:4	3.02433e+06	2.35678e+06	1.07395e+06	0	1.67458e+06	0	4.11303e+07	2.85427e+08	5.87562e+07	8.71685e+07	3.78034e+07	2.98477e+07	0	3.96845e+06	0	0	0	0	0	0	0	0	0	0	0	4.51849e+06	7.56812e+06	0	4.8532e+06	1.78189e+08	0	0	0	0	0	3.1073e+06
V636	HESI(+)	691.528	9.74	7.93	M+Na	TG(O-18:0_2:0_20:6)	TG O-40:6	1.61799e+08	1.24186e+08	1.21667e+08	1.01781e+08	1.23078e+08	1.50483e+08	1.71469e+08	1.56183e+08	1.05236e+08	1.91461e+08	2.16425e+08	1.99068e+08	3.71796e+08	279576237	2.69496e+08	4.73067e+08	3.67693e+08	3.85742e+08	3.68778e+08	2.22872e+08	2.30698e+08	1.13807e+08	2.65353e+08	2.2322e+08	1.297e+08	2.27628e+08	2.64819e+08	2.39151e+08	1.50651e+08	2.00398e+08	4.55182e+08	6.74355e+08	4.36134e+08	5.87754e+08	3.45824e+08	6.41054e+08
V637	HESI(+)	691.529	9.67	7.81	M+Na	DG(18:0_22:6)	DG 40:6	1594197769	1456312225	1017791815	1263187858	1586839527	1146717904	1567384396	2166906975	1519674696	1883451932	1889117216	1776259876	4927431086	3602164436	4663447353	4987222731	5477717217	4424347597	2991784502	2291522235	2548808125	2078766915	3051102669	2966221634	1428854344	2711389142	2772000123	3275418333	1925986184	2005131742	5837371498	6392928214	6668498756	5875848695	3926429762	5279799003
V638	HESI(+)	691.529	9.34	7.33	M+H	DG(18:2_24:7)	DG 42:9	1.77711e+07	1.88161e+07	5.02792e+07	6.13476e+07	5.02548e+07	26195292	5.51456e+07	7.595e+07	5.39297e+07	9.03955e+07	117167502	9.2594e+07	3.63217e+08	1.72867e+08	2.37626e+08	3.53552e+08	2.21314e+08	6.51439e+08	6.78936e+07	6.81665e+07	7.43946e+07	5.8479e+07	8.9188e+07	9.22394e+07	8.07395e+07	7.68937e+07	6.64963e+07	8.31467e+07	6.51998e+07	5.54686e+07	8.04529e+08	2.27434e+08	8.10219e+08	1373232310	3.46531e+08	185728325
V639	HESI(+)	691.529	9.25	7.22	M+Na	DG(18:1_22:5)	DG 40:6	2.73045e+08	3.19278e+08	2.64743e+08	312453865	6.18319e+08	2.52203e+08	317213425	2.94999e+08	275378925	4.54321e+08	6.40357e+08	2.88129e+08	1114206840	1224680027	1059269260	1309143219	9.23726e+08	3.59225e+08	5.62307e+08	5.14181e+08	7.22706e+08	4.46483e+08	9.66758e+08	9.03244e+08	5.67902e+08	2.85456e+08	243426751	2.78126e+08	2.98402e+08	1.67415e+08	1.78476e+08	8.11918e+08	1.98699e+08	3.00202e+08	6.08973e+08	1.8259e+08
V640	HESI(+)	692.621	10.73	9.54	M+NH4	DG(20:1_20:2)	DG 40:3	182821416	1.97547e+08	9.38484e+07	1.10282e+08	2.95627e+08	1.41207e+08	1.30832e+08	5.07254e+07	1.00378e+08	7.17456e+07	2.56627e+08	8.81757e+07	9.02841e+07	7.91495e+07	1.49582e+08	1.27159e+08	1.43801e+08	1.5661e+08	2.85424e+07	2.63878e+07	2.35772e+07	1.50089e+07	4.06495e+07	3.285e+07	2.06049e+08	7.41421e+07	3.55738e+07	4.92049e+07	4.9248e+07	4.68193e+07	2.48675e+08	2.55275e+08	1.22331e+08	1.96402e+08	1.47701e+08	7.5143e+07
V641	HESI(+)	693.542	9.78	7.99	M+H	TG(P-21:6_18:1_3:0)	TG O-42:8	2.91902e+08	309245176	7.78719e+08	8.83423e+08	7.39704e+08	2.53809e+08	1378384636	1197375224	1451361575	2118707757	3126115016	1479725235	3318698776	3091338017	3218102188	3740655620	3003056280	2684949221	7.81566e+08	5.82367e+08	6.26408e+08	4.52883e+08	8.36626e+08	8.00958e+08	1579070455	1428381924	9.09819e+08	1619667006	1099168897	8.61233e+08	2336491170	3372869725	2695647524	3449782524	2293589776	2412922476
V642	HESI(+)	693.542	9.98	8.33	M+Na	DG(20:1_20:4)	DG 40:5	5.70993e+07	5.15201e+07	1.20678e+08	1.45693e+08	118595620	6.58941e+07	2.25916e+08	1.67154e+08	1.62854e+08	1.89542e+08	2.30636e+08	1.71157e+08	1.41183e+08	9.16448e+07	1.27098e+08	9.21897e+07	1.12869e+08	1.27127e+08	3.28587e+07	3.06627e+07	3.42828e+07	2.9564e+07	4.69851e+07	7.78751e+07	5.11115e+07	154037486	132959947	1.21023e+08	8.959e+07	8.79668e+07	5.92201e+07	1.08567e+08	1.64385e+08	7.40091e+07	1.38024e+08	5.36414e+07
V643	HESI(+)	693.543	10.19	8.67	M+Na	DG(18:0_22:5)	DG 40:5	4.01811e+07	4.31156e+07	6.80107e+07	9.27177e+07	6.20333e+07	2.8307e+07	1.11404e+08	1.00317e+08	1.34444e+08	1.71391e+08	2.63883e+08	1.69793e+08	1.90292e+08	1.71201e+08	1.9179e+08	2.57226e+08	2.2961e+08	3.61607e+08	3.62315e+07	3.31797e+07	3.50978e+07	2.53479e+07	2.91933e+07	2.8468e+07	8.71583e+07	7.76159e+07	8.64161e+07	1.2313e+08	6.92489e+07	7.04323e+07	2.41337e+08	3.11045e+08	3.78638e+08	3.2191e+08	2.292e+08	5.88723e+08
V644	HESI(+)	693.543	9.85	8.11	M+H	DG(18:1_24:7)	DG 42:8	1.77353e+08	4.85663e+07	9.9659e+07	8.83715e+07	1.07323e+08	5.31446e+07	9.1718e+07	9.03166e+07	1.09157e+08	2.23932e+08	3.50782e+08	1.67175e+08	2.83605e+08	2.69289e+08	2.20643e+08	4.1509e+08	2.40922e+08	2.45428e+08	139247634	9.48241e+07	1.03484e+08	5.47685e+07	1.17746e+08	1.12543e+08	1.48685e+08	1.23959e+08	6.79987e+07	1.11625e+08	8.98176e+07	1.09409e+08	1.60552e+08	3.26678e+08	1.93297e+08	3.76539e+08	2.03601e+08	2.53204e+08
V645	HESI(+)	694.6	11.02	9.95	M+NH4	TG(18:2_5:0_16:0)	TG 39:2	2.42052e+06	389149	1.27321e+07	1.42689e+07	7.81239e+06	4.83929e+06	4.55016e+06	3.39162e+06	1.76094e+07	1.4221e+07	2.82676e+07	2.9338e+07	3.92403e+06	233043	1.70558e+06	2.85405e+06	1.74682e+06	1.25702e+07	1.16292e+07	7.63719e+06	2.19885e+07	2.21756e+07	1.02238e+07	4.52167e+06	1.67988e+07	2.34389e+07	1.0001e+07	4.6086e+07	2.8982e+07	1.30332e+07	8.43393e+06	2.45145e+06	6.0435e+06	3.92876e+06	1.43052e+06	3.82898e+06
V646	HESI(+)	694.601	10.79	9.63	M+NH4	TG(5:0_16:0_18:2)	TG 39:2	3.32253e+07	1.78438e+07	9.55411e+07	9.76099e+07	1.05504e+08	3.50107e+07	5.33221e+07	1.16624e+07	8.01004e+07	6.2107e+07	1.43705e+08	8.72082e+07	1.44723e+07	1.7724e+07	1.27465e+07	8.16414e+06	9.10281e+06	2.1357e+07	1.00568e+08	8.03851e+07	8.1536e+07	9.48664e+07	145712071	6.26402e+07	5.19654e+07	6.3685e+07	5.53457e+07	9.43452e+07	106798241	4.04596e+07	1.25356e+07	4.94965e+06	9.28873e+06	1.12607e+07	4.72034e+06	6.59168e+06
V647	HESI(+)	694.613	10.32	8.89	M+H	NAGly(23:0_18:0)	NAGly 41:0	5.22034e+06	3.18674e+06	6.92365e+06	1.05871e+07	6.62561e+06	2.32139e+06	1.55259e+07	1.80634e+07	1.98657e+07	1.94325e+07	2.39723e+07	1.5832e+07	1.0562e+07	1.08986e+07	1.21373e+07	1.20164e+07	8.70285e+06	1.60947e+07	3.70611e+06	3.62163e+06	7.40203e+06	4.49792e+06	6.77145e+06	7.07568e+06	8.23634e+06	1.27848e+07	1.64333e+07	1.41668e+07	4.03595e+06	2.1969e+07	1.2281e+07	1.42825e+07	1.24132e+07	1.34242e+07	2.34215e+07	2.98706e+07
V648	HESI(+)	694.635	11.24	10.23	M+NH4	DG(18:1_22:1)	DG 40:2	1.84722e+08	1.7511e+08	9.99424e+07	1.26174e+08	2.29542e+08	1.00393e+08	1.69097e+08	4.75146e+07	8.097e+07	7.25295e+07	2.56119e+08	106617818	5.40976e+07	7.54644e+07	1.0894e+08	7.48703e+07	9.88244e+07	114115692	1.67611e+07	2.02167e+07	1.4636e+07	1.07988e+07	1.92246e+07	1.78188e+07	1.85027e+08	5.12265e+07	2.56232e+07	4.25023e+07	3.32849e+07	2.27404e+07	2.08355e+08	1.90135e+08	7.59035e+07	9.07437e+07	1.14576e+08	6.40632e+07
V649	HESI(+)	694.635	11.4	10.43	M+NH4	DG(22:0_18:2)	DG 40:2	1.13625e+08	7.7397e+07	2.06791e+07	6.80038e+06	7.34748e+07	8.51148e+07	6.29653e+06	3.31988e+06	2.86187e+06	4.22248e+06	9.37804e+06	3.86448e+06	1.90068e+06	2.1961e+06	2.76111e+06	2.72692e+06	3.31445e+06	3.32795e+06	2.81035e+06	2.39714e+06	650719	1.90792e+06	2.92436e+06	3.91799e+06	5.08772e+07	1.74269e+06	979298	1.04874e+06	1.56058e+06	3.61192e+06	5.74381e+06	5.79998e+06	2.3271e+06	2.36328e+06	3.88975e+06	1.82235e+06
V650	HESI(+)	695.473	3.54	3.37	M+H	SM(t18:3_15:3)	phSM 33:6	5.5492e+06	7.69229e+06	2.07319e+06	6.03134e+06	2.38487e+06	4.17671e+06	1.1928e+07	1.50953e+07	4.58939e+06	5.39165e+06	3.80478e+06	8.61349e+06	1.78423e+06	2.4504e+06	2.29703e+06	2.88798e+06	1.4451e+06	1.7832e+06	1.18245e+07	1.87408e+07	1.32416e+07	1.19032e+07	8.05156e+06	8.25466e+06	6.09021e+06	2.12636e+07	3.21528e+07	1.52862e+07	1.70716e+07	2.66919e+07	5.72696e+06	6.32365e+06	5.73207e+06	1.05691e+07	5.73414e+06	8.96664e+06
V651	HESI(+)	695.56	10.65	9.42	M+H	TG(P-22:6_5:0_15:0)	TG O-42:7	2.90579e+08	2.84568e+08	1.02646e+08	1.21293e+08	3.60434e+08	1.31996e+08	9.40637e+07	3.35918e+07	4.37627e+07	6.3746e+07	1.22204e+08	3.35756e+07	2.10544e+07	2.05259e+07	1.42779e+07	2.76384e+07	2.32417e+07	1.85698e+07	1.63705e+07	1.50784e+07	1.40249e+07	1.23496e+07	2.00582e+07	2.1051e+07	1.05686e+08	2.00307e+07	1.33516e+07	1.59498e+07	1.58438e+07	2.69213e+07	1.6545e+07	1.56113e+07	1.24542e+07	1.64578e+07	1.70757e+07	1.98834e+07
V652	HESI(+)	695.56	10.41	9.03	M+H	TG(P-13:1_5:0_24:5)	TG O-42:7	2.40575e+08	242804422	4.94175e+08	569254563	3.29503e+08	1.28967e+08	8.73955e+08	6.66731e+08	8.95644e+08	1014744099	1760385691	1033310340	2.36403e+08	8.52147e+08	2.55994e+08	2.40815e+08	2.24866e+08	3.25657e+08	3.19928e+08	2.44378e+08	2.39345e+08	182500055	2.26249e+08	3.27821e+08	6.9899e+08	6.64258e+08	4.81086e+08	7.04993e+08	4.76595e+08	3.42024e+08	3.42879e+08	3.72738e+08	2.42198e+08	3.07805e+08	264395678	3.28265e+08
V653	HESI(+)	695.56	10.33	8.91	M+Na	DG(18:1_22:3)	DG 40:4	2.16713e+07	1.94802e+07	7.55959e+07	7.90084e+07	5.73671e+07	8.629e+06	1.34118e+08	7.3213e+07	1.34363e+08	1.66859e+08	3.23312e+08	1.90413e+08	8.63413e+08	6.33482e+08	1030113622	1038608222	9.19186e+08	1456961399	3.08775e+07	2.85656e+07	2.30138e+07	2.29846e+07	2.29992e+07	3.24787e+07	1.18596e+08	9.92616e+07	6.35858e+07	110683270	6.81359e+07	3.02399e+07	1534234655	1673964251	1022560552	1561450226	1316268637	1683815359
V654	HESI(+)	695.56	10.19	8.68	M+H	DG(24:7_18:0)	DG 42:7	8.71978e+07	6.56149e+07	2.39707e+07	3.22367e+07	8.92705e+07	6.57376e+07	3.79918e+07	1.84426e+07	3.58988e+07	3.34934e+07	8.7939e+07	3.57649e+07	8.60408e+07	3.6765e+07	7.25167e+07	8.21948e+07	9.0175e+07	8.40526e+07	1.04942e+07	8.94205e+06	9.62558e+06	7.49851e+06	1.61114e+07	1.85388e+07	4.3724e+07	2.25229e+07	1.67527e+07	2.95097e+07	2.0677e+07	7.48043e+06	8.67497e+07	118481719	9.03374e+07	1.56312e+08	7.41261e+07	6.43146e+07
V655	HESI(+)	695.561	9.27	7.24	M+H	DG(20:4_22:3)	DG 42:7	1.6444e+06	2.93017e+06	4.09252e+06	5.02364e+06	4.48582e+06	1.3971e+06	1.05355e+06	3.01123e+06	1.55331e+06	4.52667e+06	5.46505e+06	824840	3.44866e+06	1.07668e+07	4.20531e+06	2.15861e+06	0	0	1.6824e+06	3.66694e+06	3.99666e+06	1.17711e+06	1.34798e+07	9.54233e+06	4.22521e+06	2.03816e+06	867247	641856	2.76443e+06	0	1.11953e+06	0	0	1.0815e+06	0	0
V656	HESI(+)	696.614	11.35	10.37	M+NH4	TG(5:0_16:0_18:1)	TG 39:1	9.89589e+06	2.73034e+06	3.2371e+07	2.88423e+07	2.00773e+07	8.06536e+06	1.44698e+07	3.22032e+06	1.95931e+07	2.13337e+07	2.11324e+08	3.07227e+07	3.06671e+07	1.74594e+07	7.13804e+06	1.32187e+07	1.03882e+07	7.52897e+07	9.61379e+07	7.94745e+07	7.65657e+07	1.01733e+08	1.7803e+07	3.35774e+07	1.91219e+07	1.90869e+07	9.7447e+06	2.5743e+07	102912458	1.76825e+07	7.7673e+06	1.2657e+07	1.91338e+07	4.40448e+06	1.79128e+07	2.25637e+07
V657	HESI(+)	696.631	10.67	9.44	M+H	Cer(d18:1/28:5)	Cer 46:6	7.85401e+06	1.08101e+07	1.52282e+07	2.46128e+07	5.97169e+06	9.28629e+06	2.84403e+06	753088	2.44984e+06	5.24464e+06	5.40065e+06	2.51707e+06	384448	2.8049e+06	6.3756e+06	3.91967e+06	8.14996e+06	3.53621e+06	3.23314e+06	7.50767e+06	1.99154e+07	6.23586e+06	1.55799e+07	1.06159e+07	5.39223e+06	2.75319e+06	1.14644e+06	1.37776e+06	2.85496e+06	1.5609e+06	877390	3.19137e+06	4.79064e+06	427964	2.55173e+06	602552
V658	HESI(+)	697.525	5.93	4.88	M+Na	SM(d16:1_16:0)	SM 32:1	1.01734e+07	1.18945e+07	1.86991e+07	3.07636e+07	2.21551e+07	1.13555e+07	2.43008e+07	4.66649e+07	4.24155e+07	3.55796e+07	2.5453e+07	3.20234e+07	2.73714e+07	2.61324e+07	2.25809e+07	2.32529e+07	1.29329e+07	2.57732e+07	4.62952e+07	3.29769e+07	4.87406e+07	5.61661e+07	3.92592e+07	2.90139e+07	1.65293e+07	3.81495e+07	6.13012e+07	5.00005e+07	5.96499e+07	3.81622e+07	1.90839e+07	2.40354e+07	3.92786e+07	4.29077e+07	2.70536e+07	5.70927e+07
V659	HESI(+)	697.526	6.03	4.93	M+H	SM(d18:1_16:3)	SM 34:4	162044	175294	1.45455e+06	1.11554e+06	742182	133572	751241	897164	1.04177e+06	1.83184e+06	675390	1.75577e+06	1.03405e+06	790496	918915	702301	214986	903658	3.03523e+06	730475	2.09138e+06	2.33688e+06	1.10273e+06	885519	393518	668620	3.04881e+06	1.60078e+06	1.41856e+06	699401	599724	1.28374e+06	1.42593e+06	1.00013e+06	1.36984e+06	3.48143e+06
V660	HESI(+)	697.573	11.12	10.09	M+NH4	DG(18:0_22:3)	DG 40:3	1.9782e+07	1.48227e+07	9.39001e+06	1.23023e+07	2.06601e+07	1.3032e+07	6.45384e+06	1.23088e+06	3.23252e+06	4.96315e+06	1.24608e+07	1.58283e+06	1.93351e+06	2.06247e+06	2.22584e+06	2.16614e+06	2.40004e+06	4.69137e+06	252424	327806	26667.6	182856	11487	290841	1.47651e+07	871696	0	649597	793733	11664.9	3.52003e+06	1.05146e+07	1.74671e+06	7.72245e+06	6.43904e+06	3.11177e+06
V661	HESI(+)	697.574	10.71	9.51	M+Na	TG(P-13:1_5:0_22:1)	TG O-40:3	133973023	150955003	7.43732e+07	7.25266e+07	2.32967e+08	1.159e+08	9.02514e+07	3.47041e+07	5.43411e+07	5.75339e+07	1.48743e+08	6.51859e+07	8.13665e+07	7.73452e+07	1.17325e+08	1.05047e+08	1.17616e+08	1.04846e+08	1.67879e+07	1.72646e+07	1.74569e+07	1.24192e+07	2.29957e+07	2.34473e+07	1.21017e+08	3.70985e+07	2.68451e+07	3.74298e+07	2.6317e+07	2.60665e+07	1.31122e+08	149776718	8.55747e+07	1.47665e+08	1.06612e+08	6.85616e+07
V662	HESI(+)	697.578	10.02	8.39	M+H	TG(O-12:1_6:0_24:5)	TG O-42:6	5.25106e+06	1.93646e+06	1.18538e+07	7.75031e+06	5.10808e+06	1.97386e+06	1.60883e+07	9.83714e+06	1.36997e+07	9.71258e+06	3.99804e+07	1.71657e+07	4.96063e+07	3.16603e+07	4.24428e+07	5.92041e+07	2.70235e+07	4.94365e+07	0	2.72075e+06	744061	0	156063	2.39061e+06	1.75813e+07	1.2895e+07	6.77627e+06	1.41583e+07	8.74098e+06	5.20933e+06	7.85592e+07	6.43613e+07	2.28819e+07	7.62048e+07	2.41027e+07	1.80792e+07
V663	HESI(+)	699.556	11.02	9.96	M+Na	TG(18:2_5:0_16:0)	TG 39:2	710361	221089	6.51727e+06	6.04341e+06	3.28242e+06	4.5334e+06	3.2022e+06	1.7801e+06	9.97263e+06	7.36175e+06	1.60088e+07	1.49684e+07	2.0232e+06	885586	1.49342e+06	1.91951e+06	1.07397e+06	7.40793e+06	5.62228e+06	3.41782e+06	9.2101e+06	9.81417e+06	4.124e+06	2.60617e+06	8.95794e+06	1.0388e+07	3.82481e+06	2.36025e+07	1.12014e+07	6.64009e+06	5.2622e+06	1.74815e+06	2.57043e+06	2.32882e+06	630262	2.37146e+06
V664	HESI(+)	699.592	11.39	10.42	M+Na	TG(P-13:1_5:0_22:0)	TG O-40:2	193243082	1.4206e+08	3.90877e+07	1.42264e+07	1.38442e+08	1.49749e+08	1.06342e+07	9.66776e+06	6.60399e+06	1.5726e+07	2.03364e+07	5.76125e+06	4.17068e+06	4.42323e+06	5.27804e+06	5.55347e+06	5.92347e+06	5.4896e+06	6.24298e+06	4.09734e+06	2.94406e+06	5.02807e+06	6.37441e+06	6.98118e+06	1.00469e+08	3.48526e+06	4.93161e+06	3.36778e+06	2.80531e+06	4.83819e+06	1.02782e+07	9.3447e+06	4.62398e+06	5.30691e+06	6.69783e+06	4.48908e+06
V665	HESI(+)	699.592	10.43	9.07	M+H	DG(18:1_24:4)	DG 42:5	632146	2.94378e+06	3.25775e+06	1.70089e+06	1.90851e+06	2.09434e+06	7.29884e+06	6.35587e+06	8.51931e+06	1.11775e+07	1.85273e+07	1.59206e+07	2.61465e+07	1.8275e+07	2.13494e+07	2.89923e+07	1.33675e+07	2.51353e+07	1.91434e+06	4.28337e+06	695973	2.55811e+06	2.21311e+06	2.10291e+06	1.06815e+07	1.62008e+07	1.71941e+07	9.20666e+06	2.46066e+06	2.68839e+06	1.95713e+07	3.2738e+07	1.98658e+07	3.75424e+07	1.97779e+07	1.16916e+07
V666	HESI(+)	700.571	7.45	5.6	M+H	HexCer(d18:1_16:0)	HexCer34:1	0	0	2.79608e+06	0	0	1.51791e+06	8.82641e+06	7.10763e+06	4.9036e+06	3.81521e+06	0	6.8328e+06	1.60551e+07	1.70426e+07	1.03513e+07	1.55472e+07	6.65335e+06	1.9335e+07	3.13343e+06	9.91887e+06	1.08998e+06	1.36677e+06	0	0	0	1.9005e+07	1.60217e+06	6.32962e+06	0	3.6846e+06	3.80947e+07	2.44464e+07	1.38691e+07	2.04768e+07	1.20653e+07	0
V667	HESI(+)	701.558	6.22	5.01	M+H	SM(d18:1_16:1)	SM 34:2	5.66807e+07	4.73216e+07	7.25387e+07	9.08035e+07	4.97336e+07	6.70201e+07	4.99921e+07	6.31571e+07	6.10358e+07	7.79695e+07	7.06773e+07	7.32302e+07	5.7442e+07	3.07815e+07	3.20772e+07	4.50664e+07	2.71671e+07	4.70324e+07	9.47262e+07	7.5294e+07	6.89063e+07	7.68498e+07	8.99686e+07	4.75661e+07	8.85551e+07	5.29986e+07	5.57811e+07	7.80776e+07	2.7942e+07	1.11224e+08	5.71246e+07	3.54832e+07	3.4256e+07	1.88092e+07	4.03252e+07	4.06804e+07
V668	HESI(+)	701.571	11.33	10.34	M+Na	TG(5:0_16:0_18:1)	TG 39:1	1.479e+07	7.84413e+06	5.38998e+07	5.81346e+07	3.94493e+07	5.42623e+06	2.40939e+07	5.52948e+06	5.93017e+07	4.5591e+07	8.52555e+07	6.01138e+07	1.27359e+07	3.69726e+06	9.43643e+06	6.37427e+06	5.81601e+06	3.07865e+07	4.22222e+07	3.05854e+07	3.06064e+07	3.57441e+07	2.80011e+07	1.54814e+07	3.63903e+07	2.80677e+07	1.41593e+07	5.63006e+07	3.86635e+07	3.00298e+07	1.37665e+07	6.57143e+06	9.55986e+06	1.04815e+07	7.49938e+06	12723714
V669	HESI(+)	701.571	11.3	10.31	M+H	TG(20:4_5:0_16:0)	TG 41:4	1.44687e+07	7.85605e+06	5.36328e+07	5.78467e+07	3.9254e+07	1.94992e+07	2.39857e+07	6.42662e+06	6.03389e+07	4.53652e+07	8.484e+07	5.86535e+07	1.26728e+07	3.83723e+06	9.38967e+06	6.35681e+06	5.82902e+06	3.05252e+07	4.42401e+07	3.15042e+07	3.01825e+07	3.50527e+07	2.81947e+07	1.60392e+07	3.621e+07	2.93302e+07	1.42466e+07	5.67063e+07	3.89676e+07	2.44761e+07	1.36983e+07	6.53889e+06	9.51252e+06	1.05379e+07	7.46224e+06	1.26607e+07
V670	HESI(+)	701.606	11.43	10.46	M+H	DG(18:1_24:3)	DG 42:4	1.59586e+07	1.1908e+07	1.59754e+07	3.99301e+06	1.47401e+07	1.40209e+07	2.16883e+06	3.25205e+06	3.82138e+06	1.46558e+06	2.10259e+06	1.87121e+06	0	0	0	50020.6	0	24615.5	1.05921e+07	2.37846e+07	8.05612e+06	3.3575e+06	1.78508e+07	1.03709e+07	7.84579e+06	1.28779e+07	1.48657e+07	1.69367e+07	1.21481e+07	1.50655e+07	485738	87558.3	52606.9	4941.62	0	28162.1
V671	HESI(+)	702.466	2.32	2.18	M+H	PS(O-15:1_16:2)	PS O-31:3	1.66877e+08	211495272	1.0322e+08	1.04262e+08	2.63134e+08	1.33421e+08	6.36818e+07	6.53936e+07	5.06328e+07	4.99144e+07	3.44243e+07	5.06075e+07	2.64087e+07	2.58535e+07	1.52229e+07	1.87219e+07	2.06988e+07	2.62927e+07	1.16164e+08	1.83348e+08	2.23338e+08	1.55248e+08	1.39087e+08	1.11959e+08	1.35878e+08	6.4981e+07	7.60799e+07	1.03211e+08	1.21259e+08	2.94289e+07	3.87057e+07	1.27135e+07	3.13764e+07	3.1888e+07	2.69743e+07	4.98553e+07
V672	HESI(+)	702.507	5.5	4.69	M+H	PC(15:1_15:1)	PC 30:2	9.36236e+06	4.18379e+07	5.63481e+07	1.00127e+08	3.22007e+07	5.71867e+06	2.47966e+06	2.12493e+06	1.48444e+07	1.02857e+07	2.43169e+07	1.07005e+07	4.06265e+06	1.14853e+06	1.60843e+06	2.33306e+06	7.65576e+06	3.54227e+06	2.25905e+07	2.6882e+06	2.22803e+07	1.72192e+07	8.87557e+06	8.45401e+06	4.10994e+06	3.15138e+06	1.50063e+06	4.06259e+06	7.22083e+06	2.11144e+07	1.85651e+06	1.32209e+06	3.50386e+06	1.26436e+07	1.11814e+07	1.06067e+07
V673	HESI(+)	703.576	7.3	5.51	M+H	SM(d18:0_16:1)	SM 34:1	3.74756e+07	3.61784e+07	2.8811e+07	4.13352e+07	2.44936e+07	2.3927e+07	6.4763e+07	1.03057e+08	6.35261e+07	6.51964e+07	1.82065e+07	5.20341e+07	7.34015e+07	1.28011e+08	8.91186e+07	9.93361e+07	7.09402e+07	4.31246e+07	7.07515e+07	1.22737e+08	7.96299e+07	7.8938e+07	5.89399e+07	7.16595e+07	4.47829e+07	1.14687e+08	1.33344e+08	5.4581e+07	5.69986e+07	5.69752e+07	1.14535e+08	1.04225e+08	1.17501e+08	1.11826e+08	6.3316e+07	5.50293e+07
V674	HESI(+)	703.576	7.14	5.43	M+H	SM(d18:1_16:0)	SM 34:1	1.12166e+08	1.29871e+08	261392320	3.11495e+08	1.85306e+08	3.20361e+08	3.75884e+08	5.00378e+08	2.951e+08	3.73686e+08	251629147	5.49008e+08	9.6644e+08	316558148	2.86867e+08	8.94587e+08	7.39427e+08	8.85299e+08	6.40876e+08	4.84104e+08	305736052	8.00205e+08	3.36537e+08	4.4922e+08	9.34928e+07	1.96381e+08	4.89594e+08	7.4051e+08	6.57307e+08	333772740	2.43508e+08	2.39394e+08	4.77069e+08	5.90757e+08	4.5361e+08	9.25908e+08
V675	HESI(+)	704.425	1.32	1.12	M+NH4	BMP(4:0_26:4)	BMP 30:4	0	2.89498e+06	1.67925e+06	4.54039e+06	3.58976e+06	0	0	0	8.76727e+06	6.93996e+06	5.48031e+06	4.24203e+06	4.92957e+06	3.5198e+06	3.92386e+06	6.8548e+06	3.77588e+06	4.73199e+06	9.14545e+06	4.01679e+06	4.63156e+06	5.16543e+06	3.0127e+06	8.5285e+06	3.69928e+06	0	3.81566e+06	9.00738e+06	0	4.95075e+06	4.03427e+06	5.83226e+06	0	0	3.43748e+06	1.04177e+07
V676	HESI(+)	704.523	6.24	5.02	M+H	PC(16:1_14:0)	PC 30:1	9.40443e+08	8.06842e+08	1494904776	1772794832	620922156	9.45212e+08	3.64592e+08	1.60392e+08	3.00286e+08	314652206	4.83991e+08	3.87746e+08	1.05586e+08	9.62404e+07	1.32027e+08	120868048	1.60472e+08	2.69344e+08	5.36354e+08	2.93054e+08	5.81235e+08	6.79939e+08	310215274	1.91673e+08	528199626	3.2926e+08	2.38377e+08	3.39495e+08	5.65578e+08	1074583348	1.3592e+08	1.98617e+08	1.43142e+08	3.46247e+08	3.09252e+08	3.36304e+08
V677	HESI(+)	704.523	6.54	5.15	M+H	PC(15:1_15:0)	PC 30:1	2.67141e+06	7.66071e+06	1.05358e+07	6.83057e+06	2.31816e+06	4.96928e+06	1.66891e+07	2.81931e+07	8.13859e+06	9.5683e+06	3.04517e+07	9.79282e+06	2.23249e+07	1.04567e+08	8.33307e+07	2.35188e+07	2.6121e+07	2.68655e+07	5.71596e+06	1.27059e+07	7.33916e+06	4.85111e+06	1.94677e+06	1.38561e+06	1.09802e+07	2.97184e+07	8.40261e+06	3.44216e+06	1.55233e+07	1.28656e+07	3.7217e+07	7.13372e+07	6.80706e+07	1.40533e+07	1.57175e+07	1.68133e+07
V678	HESI(+)	704.582	10.35	8.94	M+NH4	TG(10:0_15:2_15:2)	TG 40:4	1.8421e+06	1.25653e+06	5.29676e+06	6.49656e+06	1.65097e+06	3.08235e+06	2.26237e+06	5.61438e+06	2.96574e+06	1.81666e+06	1.575e+06	3.1661e+06	1.67846e+06	1.62433e+06	726594	1.60415e+06	1.49039e+06	413019	2.75398e+06	1.67939e+06	2.7295e+06	2.28814e+06	1.62015e+06	2.82887e+06	902322	1.2677e+07	9.64413e+06	8.89476e+06	1.05113e+07	7.11845e+06	8.45146e+06	7.39802e+06	5.0627e+06	5.51754e+06	6.67788e+06	2.6701e+06
V679	HESI(+)	705.58	7.06	5.39	M+H	SM(d18:0_16:0)	SM 34:0	3.80428e+08	3.46014e+08	5.39361e+08	499403423	4.08479e+08	4.11337e+08	6.63173e+08	1191421082	8.04892e+08	7.93863e+08	492259201	9.867e+08	1706906543	1072860234	1030789742	1259860830	1396288556	1291889307	1031888751	1034323474	9.13318e+08	9.98649e+08	8.63044e+08	1061479514	453054498	9.61049e+08	1264060134	1147459509	1008064900	8.97196e+08	9.69076e+08	8.86967e+08	1397347503	1267203589	1144132123	1349796349
V680	HESI(+)	705.593	7.41	5.58	M+H	SM(d18:0_16:0)	SM 34:0	6.7961e+07	5.65889e+07	2.82121e+07	3.34493e+07	2.97853e+07	7.60321e+07	5.62211e+07	4.67066e+07	5.46867e+07	5.03874e+07	3.69626e+07	4.36359e+07	5.73569e+07	6.10109e+07	1.02718e+08	8.2583e+07	1.38647e+08	54987128	5.77248e+07	9.86697e+07	9.13166e+07	8.96536e+07	5.44298e+07	5.59967e+07	4.87439e+07	5.83129e+07	151774255	4.50517e+07	5.73724e+07	3.97334e+07	1.35948e+08	1.30719e+08	1.43268e+08	1.11785e+08	8.46407e+07	153265323
V681	HESI(+)	706.54	7.33	5.53	M+H	PC(15:0_15:0)	PC 30:0	6.15913e+06	3.46675e+06	1.46603e+07	1.38905e+07	2.83264e+06	2.30269e+06	0	0	57191.3	1.50882e+06	0	0	0	0	0	0	1.78565e+06	0	1.38002e+07	1.26477e+07	3.51791e+06	1.30997e+07	6.40354e+06	8.46378e+06	251608	2.71434e+06	64939.9	1.26797e+06	2.59101e+06	6.38937e+06	0	9.04555e+06	204390	7.55615e+06	308775	1.25977e+06
V682	HESI(+)	706.54	7.07	5.4	M+H	PC(16:0_14:0)	PC 30:0	1259594306	1277237637	2150918598	2546814673	1209356164	1039906265	9.99156e+08	874877920	1051644187	8.25665e+08	1016580045	9.09477e+08	5.97279e+08	7.95101e+08	1072788537	8.62612e+08	1311569830	9.91621e+08	2041254890	1968848613	2192615825	2580771073	1640178012	1474785848	1693579452	1533594690	1081361574	1493729440	2161539808	1857140703	1158729699	1651801894	9.6799e+08	2165033753	2031289970	1086952625
V683	HESI(+)	706.541	7.3	5.51	M+NH4	DG(20:4_22:6)	DG 42:10	7.45924e+06	3.88308e+06	1.6152e+07	1.63938e+07	1.54964e+06	2.70224e+06	0	0	2.06076e+06	1.69707e+06	0	0	0	0	0	0	1.90284e+06	0	15204108	1.39346e+07	3.84119e+06	1.44321e+07	7.05491e+06	8.12467e+06	7.19766e+06	3.01543e+06	2.33039e+06	1.41439e+06	3.81114e+06	7.30246e+06	0	1.17677e+07	1.8152e+06	9.36016e+06	1.13964e+07	1.37772e+06
V684	HESI(+)	706.541	8.13	6.06	M+NH4	DG(20:4_22:6)	DG 42:10	2.99823e+07	3.66595e+07	4.03408e+07	3.71404e+07	6.25879e+07	7.54596e+07	8.15176e+07	8.08806e+07	5.08056e+07	9.52381e+07	107952187	6.55333e+07	2.20561e+08	235240005	1.90767e+08	3.07579e+08	1.72147e+08	1.32966e+08	5.73394e+07	7.4169e+07	6.55143e+07	4.09978e+07	9.74276e+07	9.31864e+07	8.90164e+07	9.04315e+07	6.74573e+07	7.30738e+07	8.64288e+07	5.41407e+07	9.84262e+07	1.88676e+08	1.44878e+08	1.80441e+08	1.10705e+08	7.25523e+07
V685	HESI(+)	706.598	10.57	9.3	M+NH4	TG(4:0_18:1_18:2)	TG 40:3	164858103	1.5309e+07	1.26747e+07	2.0232e+07	1.57558e+07	2.58356e+07	1.17074e+07	8.77096e+06	1.1375e+07	1.05658e+07	1.69467e+07	1.39425e+07	1.16279e+07	1.21107e+07	8.95016e+06	1.50719e+07	1.80588e+07	1.17521e+07	1.32239e+07	1.16136e+07	1.41616e+07	1.47714e+07	2.61738e+07	1.56512e+07	4.55268e+06	3.55114e+07	1.88727e+07	1.90832e+07	2.74912e+07	619691	2.22513e+07	2.54704e+07	1.59245e+07	3.1486e+07	2.65254e+07	5.65264e+06
V686	HESI(+)	707.521	4.92	4.39	M+H	TG(12:2_15:4_15:2)	TG 42:8	1.24758e+07	2.37565e+07	1.64876e+07	5.69985e+06	9.73387e+06	4.19704e+07	1.06002e+07	1.0948e+07	3.36137e+06	5.56851e+06	6.37294e+06	1.19571e+07	2.44435e+06	0	135500	1.87466e+06	79579.9	554975	2.40856e+07	9.79053e+06	8.01272e+06	7.64145e+06	1.41978e+07	1.47245e+07	3.37034e+06	1.24766e+07	1.4206e+07	1.23677e+07	2.09204e+07	3.47699e+07	0	0	0	2.20771e+06	0	0
V687	HESI(+)	708.424	1.98	1.81	M+NH4	BMP(4:0_26:2)	BMP 30:2	1.58891e+06	189354	122195	1.32801e+06	10704.5	6130.62	2.35938e+07	2.22308e+07	8.47192e+06	1.17744e+07	7.87113e+06	1.7687e+07	1.59891e+06	8663.2	687837	105061	2.03442e+06	1.45244e+06	2.89228e+06	5.10401e+06	4.78072e+06	1.6875e+06	4.38908e+06	122709	2.45531e+06	8.17317e+06	3.51799e+06	914064	1.70961e+07	1.24621e+06	285356	56529.4	0	0	1.14392e+06	913141
V688	HESI(+)	708.49	1.23	1.03	M+Na	PC(O-12:1_18:2)	PC O-30:3	2.28898e+07	3.31136e+07	3.78546e+07	1.20601e+07	2.94535e+07	6.79737e+06	3.21874e+07	4.82684e+07	3.69527e+07	3.74232e+07	4.10973e+07	2.50429e+07	5.3247e+07	1.6551e+07	4.89526e+06	7.72333e+07	7.43615e+07	1.36279e+07	3.96816e+06	4.06302e+06	7.92844e+07	3.48451e+07	2.19437e+07	2.75923e+07	1.17008e+07	3.64935e+07	4.3267e+06	2.95345e+07	3.45122e+06	4.19319e+06	4.00981e+06	1.73534e+07	3.66126e+07	7.81186e+06	3.00486e+07	1.74497e+07
V689	HESI(+)	708.557	8.56	6.44	M+NH4	DG(20:3_22:6)	DG 42:9	0	2.41212e+06	1.50733e+06	1.464e+06	0	2.57746e+06	6.41018e+06	0	0	2.29511e+06	3.79224e+06	64609	3.71702e+07	6.07353e+07	8.50196e+07	9.66543e+07	7.21612e+07	2.36409e+07	2.12232e+06	286555	4.8594e+06	0	0	1.8614e+06	3.2974e+07	0	0	0	75385.3	0	4.01495e+07	4.57462e+07	4.42919e+07	7.81721e+07	3.50608e+07	1.38278e+07
V690	HESI(+)	708.557	8.8	6.68	M+NH4	DG(20:3_22:6)	DG 42:9	0	0	8.17189e+06	8.02247e+06	5.1675e+06	828776	1.79892e+07	1.31728e+07	9.32746e+06	2.30687e+07	3.88822e+07	1.06166e+07	7.14868e+07	101367729	5.50823e+07	1.31775e+08	4.54582e+07	5.64288e+07	39552.6	1.31683e+06	1.53404e+06	0	9.56557e+06	3.99215e+06	2.96378e+07	8.89578e+06	8.7685e+06	3.5661e+06	1.32465e+07	3.24037e+06	6.91609e+07	7.07738e+07	5.03985e+07	7.67741e+07	5.93982e+07	6.34599e+07
V691	HESI(+)	708.616	11.1	10.06	M+NH4	TG(6:0_16:0_18:2)	TG 40:2	1.87006e+08	1.42075e+07	2.49423e+07	3.70923e+07	2.70595e+07	4.83346e+07	1.244e+07	9.0849e+06	1.34599e+07	1.28154e+07	2.45821e+07	2.65457e+07	1.87374e+07	1.29428e+07	1.89337e+07	2.34516e+07	3.83241e+07	2.60406e+07	1.6863e+07	1.28648e+07	2.54966e+07	2.07683e+07	2.75961e+07	1.48432e+07	7.13633e+06	5.92324e+07	2.76666e+07	6.24243e+07	5.76563e+07	2.06257e+07	4.50895e+07	4.63556e+07	2.83923e+07	5.61337e+07	5.2498e+07	1.84437e+07
V692	HESI(+)	709.538	5.5	4.69	M+H	TG(12:2_15:3_15:2)	TG 42:7	2.5883e+07	4.02883e+07	3.83566e+07	3.07186e+07	1.67019e+07	5.09761e+07	4.58482e+07	6.86013e+07	1.89684e+07	1.86071e+07	9.21356e+06	7.00035e+07	8.01692e+06	1.81281e+06	1.24877e+06	6.03216e+06	400505	1.82159e+06	5.07322e+07	5.76299e+07	4.53941e+07	4.10842e+07	8.11298e+07	3.16357e+07	5.56047e+06	5.80955e+07	8.29202e+07	8.91825e+07	1.07647e+08	4.59399e+07	533520	713608	1.40084e+06	1.27271e+07	994603	0
V693	HESI(+)	710.451	2.1	1.94	M+NH4	BMP(4:0_26:1)	BMP 30:1	608299	865617	2.56033e+06	724741	92243	369378	448288	1.41676e+06	412629	2.32796e+06	7.47129e+06	2.34581e+06	1.34683e+06	1.39683e+06	59660	0	476223	2.09315e+06	490387	291686	136877	1.05596e+06	595155	16356.9	36533.3	421436	2.4217e+06	2.16327e+06	1.9356e+06	104474	0	2.97541e+06	587221	3073.96	189373	700222
V694	HESI(+)	710.561	10.71	9.51	M+NH4	DG(20:3_22:5)	DG 42:8	9.74146e+06	9.07585e+06	6.7722e+06	1.10271e+07	1.4385e+07	9.46494e+06	7.40593e+06	5.25276e+06	5.45981e+06	5.64135e+06	4.78571e+06	5.30406e+06	0	0	0	0	0	0	1.03768e+07	1.28839e+07	1.61656e+07	1.1233e+07	1.47829e+07	1.09829e+07	4.10404e+06	5.03446e+06	5.11236e+06	9.14149e+06	9.08979e+06	1.11023e+07	0	0	0	0	142023	960927
V695	HESI(+)	710.57	8.86	6.74	M+NH4	DG(20:3_22:5)	DG 42:8	1.85744e+08	2.38654e+08	194399391	2.28915e+08	3.30334e+08	1.75674e+08	2.09476e+08	1.50829e+08	2.17428e+08	2.43052e+08	5.03871e+08	1.64154e+08	366711943	3.86699e+08	2.88037e+08	3.86771e+08	2.23202e+08	1.85278e+08	204134866	2.5719e+08	2.27131e+08	1.59147e+08	5.21798e+08	5.64523e+08	3.60398e+08	1.50866e+08	1.29599e+08	1.47959e+08	2.09279e+08	3.77797e+07	3.33334e+08	2.33295e+08	232769807	3.7934e+08	178757435	4.03678e+07
V696	HESI(+)	710.57	9.09	7.01	M+NH4	DG(20:2_22:6)	DG 42:8	2.74108e+07	3.65239e+07	4.27626e+07	2.80211e+07	8.0048e+07	2.79657e+07	1.11885e+08	8.88445e+07	8.10256e+07	1.48523e+08	1.9466e+08	9.20721e+07	302176009	3.34631e+08	2.98425e+08	4.56757e+08	2.9869e+08	1.54298e+08	5.82481e+07	6.79884e+07	5.90971e+07	3.13995e+07	1.23331e+08	1.17749e+08	1.24123e+08	1.36481e+08	2.64111e+07	8.0499e+07	103501940	44802931	169040816	2.60252e+08	2.63217e+08	325147225	1.49847e+08	9.67864e+07
V697	HESI(+)	710.571	8.94	6.83	M+NH4	DG(20:4_22:4)	DG 42:8	8.06697e+06	1.6627e+07	1.42937e+07	1.46018e+07	3.19034e+07	1.2463e+07	1.01446e+07	8.73034e+06	1.78824e+07	2.31955e+07	3.3498e+07	1.10108e+07	3.73362e+07	1.8326e+07	1.43178e+07	3.82562e+07	1.55458e+07	2.00495e+07	1.47102e+07	1.6433e+07	1.17497e+07	9.67834e+06	2.84189e+07	2.81268e+07	3.35865e+07	9.65228e+06	9.61426e+06	1.20653e+07	8.30486e+06	2.75734e+06	2.42442e+07	1.52055e+07	1.53224e+07	3.69205e+07	1.95472e+07	5.61761e+06
V698	HESI(+)	710.574	9.06	6.97	M+NH4	DG(20:2_22:6)	DG 42:8	2.80315e+07	3.68281e+07	4.33807e+07	4.61602e+07	8.12842e+07	2.90564e+07	1.14498e+08	9.10283e+07	8.123e+07	1.50613e+08	1.97732e+08	9.40418e+07	3.09253e+08	3.3304e+08	298063784	4.54518e+08	3.0687e+08	1.57539e+08	6.0338e+07	6.85485e+07	5.96848e+07	3.10611e+07	1.27887e+08	1.22774e+08	1.26369e+08	1.4362e+08	9.73793e+07	8.30291e+07	1.04253e+08	4.59951e+07	2.12886e+08	2.62048e+08	2.64277e+08	3.23858e+08	149090032	1.00302e+08
V699	HESI(+)	710.574	9.31	7.3	M+NH4	TG(P-12:1_6:0_24:6)	TG O-42:8	160933	6.58351e+06	6.0425e+06	6.43459e+06	1.125e+07	4.56391e+06	1.25863e+07	2.78316e+07	1.31023e+07	3.84124e+06	3.1366e+07	3.26331e+07	4.97934e+07	7.38449e+07	4.07849e+07	4.97665e+07	3.2023e+07	5.78277e+07	1.89234e+06	4.95852e+06	5.98737e+06	1.06096e+06	4.83144e+06	1.25321e+07	2.40792e+07	1.42865e+07	5.8662e+06	1.40542e+07	7.14081e+06	6.83163e+06	7.64624e+07	6.99066e+07	3.96654e+07	5.2201e+07	6.9802e+07	8.06294e+07
V700	HESI(+)	710.633	11.58	10.63	M+NH4	TG(6:0_16:0_18:1)	TG 40:1	62230950	5.00506e+06	1.9925e+07	2.37775e+07	1.02667e+07	3.66821e+07	6.89943e+06	3.50069e+06	4.40086e+06	5.10487e+06	9.76187e+06	2.39057e+07	1.31047e+07	7.83478e+06	1.91541e+07	2.47688e+07	4.87641e+07	2.79626e+07	9.63552e+06	7.15747e+06	1.77325e+07	1.32844e+07	1.0437e+07	4.80845e+06	6.25244e+06	3.74038e+07	1.56238e+07	4.44468e+07	3.18499e+07	3.11682e+07	4.91002e+07	3.76373e+07	3.12068e+07	7.45765e+07	4.45518e+07	2.35474e+07
V701	HESI(+)	711.541	6.5	5.13	M+H	SM(d18:0_17:1)	SM 35:4	2.04562e+07	1.84816e+07	3.18247e+07	3.27014e+07	2.52007e+07	2.78156e+07	1.02964e+07	3.41393e+07	3.49742e+07	2.76703e+07	1.62377e+07	2.8302e+07	6.39064e+07	6.13365e+07	5.40411e+07	7.08822e+07	4.1062e+07	4.6364e+07	7.7322e+07	8.69166e+07	8.53245e+07	1.08132e+08	7.66866e+07	7.54623e+07	1.89094e+07	2.68732e+07	7.33694e+07	4.11654e+07	4.94211e+07	4.05374e+07	3.36353e+07	3.88775e+07	8.01971e+07	9.6309e+07	4.88903e+07	1.52732e+07
V702	HESI(+)	711.554	10.58	9.31	M+Na	TG(4:0_18:1_18:2)	TG 40:3	5.60028e+07	6.88766e+06	1.21985e+07	7.98652e+06	6.50738e+06	1.10256e+07	3.44653e+06	6.86436e+06	9.85627e+06	5.95823e+06	7.8929e+06	6.17695e+06	3.26588e+06	3.97178e+06	1.20887e+06	2.8488e+06	2.20183e+06	2.73457e+06	1.02054e+07	9.06098e+06	5.39432e+06	9.79688e+06	1.78157e+07	3.81135e+06	1.38895e+06	1.0398e+07	8.67623e+06	1.37983e+07	1.15635e+07	895347	2.31744e+06	4.43062e+06	3.02876e+06	4.17074e+06	5.73031e+06	6425.73
V703	HESI(+)	712.585	9.79	8.01	M+NH4	TG(O-16:1_4:0_22:6)	TG O-42:7	9.68924e+06	1.71537e+07	2.2306e+07	2.05696e+07	2.40341e+07	1.43731e+07	3.96179e+07	2.0911e+07	2.60384e+07	3.71031e+07	8.89391e+07	33021215	9.56229e+07	9.5025e+07	9.03765e+07	1.50168e+08	8.49723e+07	1.13138e+08	1.21719e+07	7.86582e+07	1.33001e+07	4.1112e+06	1.573e+07	1.38928e+07	5.43619e+07	3.48926e+07	1.54812e+07	2.76246e+07	2.24217e+07	1.16151e+07	1.3199e+08	1.15332e+08	8.20572e+07	1.6693e+08	1.29664e+08	7.96924e+07
V704	HESI(+)	712.585	9.34	7.34	M+NH4	DG(20:3_22:4)	DG 42:7	3.5358e+06	5.01857e+06	1.10652e+07	1.34972e+07	1.34017e+07	7.4409e+06	2.11534e+07	2.13593e+07	1.33147e+07	2.71768e+07	2.50277e+07	1.48665e+07	2.24324e+07	3.04307e+07	4.66806e+07	4.35112e+07	2.40147e+07	3.61612e+07	6.8384e+06	9.42807e+06	8.97154e+06	7.19977e+06	2.67076e+07	1.75776e+07	1.67728e+07	1.46142e+07	1.3397e+07	1.03563e+07	7.40905e+06	1.24707e+07	1.71803e+07	4.69191e+07	2.01099e+07	3.87212e+07	2.61729e+07	1.64176e+07
V705	HESI(+)	712.586	9.48	7.54	M+NH4	DG(20:3_22:4)	DG 42:7	2.88596e+08	3.31934e+08	5.06033e+08	6.91073e+08	456199616	2.29114e+08	7.97934e+08	4.62438e+08	8.1663e+08	9.09807e+08	2010902620	8.19753e+08	2214192428	1148161325	1761621784	2284912258	1533552816	1567706303	3.57417e+08	3.93439e+08	3.25443e+08	2.63429e+08	5.03011e+08	4.64714e+08	8.89967e+08	6.76117e+08	4.05724e+08	6.89349e+08	6.61558e+08	1.96193e+08	2611284916	2149007850	1779265438	2989581461	1631305454	755013562
V706	HESI(+)	712.586	9	6.9	M+NH4	DG(18:2_24:5)	DG 42:7	4.68439e+06	2.57332e+06	6.81089e+06	7.24567e+06	1.80894e+07	4.23344e+06	3.30664e+07	1.1683e+07	1.5285e+07	1.49694e+07	2.29175e+07	6.03265e+06	4.41264e+07	6.79513e+07	52561248	6.19913e+07	3.92465e+07	2.78302e+07	1.5313e+07	1.77493e+07	1.71051e+07	7.28966e+06	3.10358e+07	3.42714e+07	6.64325e+07	1.34122e+07	1.75176e+07	1.01446e+07	1.98735e+07	4.0662e+06	9.11128e+07	7.58255e+07	5.1225e+07	2.36203e+07	3.75871e+07	2.4976e+07
V707	HESI(+)	712.586	9.27	7.24	M+NH4	DG(18:2_24:5)	DG 42:7	3.04466e+07	4.34445e+07	6.8842e+07	8.92231e+07	1.26828e+08	4.88263e+07	3.95061e+07	4.0163e+07	5.19659e+07	7.18847e+07	1.30022e+08	4.8859e+07	7.89584e+07	1.17251e+08	3.43153e+07	7.15698e+07	4.1553e+07	3.8228e+07	5.40057e+07	8.17957e+07	8.73804e+07	6.55646e+07	2.00419e+08	1.58498e+08	7.41885e+07	5.30064e+07	3.58911e+07	3.91669e+07	4.43132e+07	1.77935e+06	4.55957e+07	1.80853e+07	6.76812e+07	9.40549e+07	3.18145e+07	6.90462e+06
V708	HESI(+)	712.587	9.56	7.64	M+NH4	TG(O-14:2_6:0_22:5)	TG O-42:7	3.02802e+07	4.56625e+07	4.77374e+07	6.51292e+07	4.60309e+07	2.52097e+07	6.82981e+07	3.76354e+07	8.77434e+07	1.12539e+08	2.46782e+08	7.24659e+07	278675971	1.28037e+08	1.60165e+08	1.84839e+08	1.46352e+08	2.16382e+08	4.26228e+07	5.86021e+07	2.57273e+07	2.6186e+07	6.4315e+07	6.16077e+07	1.16718e+08	7.40898e+07	5.16844e+07	6.81165e+07	8.02024e+07	2.09452e+07	3.33406e+08	1.78267e+08	1.5788e+08	4.14269e+08	2.15246e+08	8.79435e+07
V709	HESI(+)	712.587	8.86	6.74	M+H	NAGly(21:0_22:5)	NAGly 43:5	1.92301e+07	2.09605e+07	2.02487e+07	1.73956e+07	2.96991e+07	1.43556e+07	1.63846e+07	1.85784e+07	1.591e+07	2.27854e+07	4.62292e+07	1.11422e+07	4.13333e+07	2.70137e+07	2.2856e+07	3.01232e+07	1.51365e+07	1.40556e+07	2.17138e+07	1.89844e+07	1.99311e+07	1.48654e+07	4.6915e+07	5.61962e+07	2.21971e+07	6.87803e+06	1.07903e+07	1.30493e+07	2.08739e+07	2.82768e+06	1.90139e+07	1.09569e+07	1.65682e+07	7.00968e+07	1.74584e+07	222808
V710	HESI(+)	712.59	9.73	7.91	M+NH4	DG(20:1_22:6)	DG 42:7	8.59941e+07	9.87001e+07	1.28389e+08	166508067	219163780	7.3226e+07	3.86874e+08	1.97348e+08	2.07972e+08	2.38577e+08	6.29631e+08	2.93568e+08	7.62981e+08	8.15184e+08	8.79032e+08	9.20228e+08	7.93893e+08	7.57543e+08	5.55493e+07	7.75342e+07	7.12902e+07	4.82727e+07	9.86231e+07	9.8266e+07	3.56946e+08	245500331	167357708	2.4564e+08	193432616	7.39768e+07	9.55196e+08	1154119872	9.39607e+08	1099721357	843356287	7.04274e+08
V711	HESI(+)	713.498	5.13	4.5	M+H	MePC(30:4)	MePC 30:4	3.49387e+07	4.69221e+07	3.49361e+07	7.19838e+07	3.71299e+07	3.90893e+07	2.70351e+07	3.80651e+07	5.48056e+06	1.41173e+07	1.23229e+07	7.00835e+07	2.69942e+06	101037	263526	1.18469e+06	10901.3	266919	5.97687e+07	7.21509e+07	9.12431e+07	1.11731e+08	9.79103e+07	4.09104e+07	1.70737e+06	1.06274e+07	3.35149e+07	3.02222e+07	1.73256e+08	9.72007e+07	3627.35	142982	76644.9	1.1116e+06	4830.11	4644.78
V712	HESI(+)	713.53	2.98	2.85	M+H	SM(t18:1_16:3)	phSM 34:4	3.29973e+06	9.82526e+06	9.11547e+06	6.24736e+06	5.19993e+06	1.02072e+07	1.30467e+07	1.37082e+07	4.28763e+06	4.22358e+06	2.98989e+06	2.22451e+07	2.1496e+06	643891	698706	2.25e+06	308560	777165	8.99845e+06	1.14213e+07	1.1428e+07	8.38219e+06	2.44113e+07	5.01005e+06	1.32179e+06	2.7832e+07	3.43313e+07	2.19991e+07	4.01596e+07	3.85736e+06	234083	114826	327380	2.27181e+06	261288	2093.93
V713	HESI(+)	714.506	7.29	5.51	M+H	PE(16:0_18:3)	PE 34:3	5.87671e+07	5.40844e+07	1.26638e+07	1.06742e+07	1.79624e+07	6.1385e+07	2.42465e+06	0	2.06248e+06	4.32121e+06	3.36145e+06	0	1.91463e+06	0	3.36271e+06	2.20198e+06	5.74153e+06	3.47253e+06	1.1409e+07	1.42589e+07	2.46655e+07	2.36446e+07	6.26004e+06	1.14961e+07	1.06109e+07	0	1.68703e+06	2.94637e+06	1.73497e+06	0	1.84418e+06	1.27314e+06	0	7.58362e+06	1.92897e+06	0
V714	HESI(+)	714.507	6.93	5.32	M+H	PE(16:1_18:2)	PE 34:3	4.10755e+08	3.44555e+08	1.76189e+08	2.56085e+08	2.55026e+08	2.97986e+08	7.46614e+07	5.09073e+07	7.1166e+07	5.0059e+07	6.13216e+07	3.52461e+07	2.41714e+07	4.50801e+07	4.04866e+07	3.83776e+07	3.58508e+07	2.60611e+07	1.14981e+08	125507093	2.4164e+08	243754813	1.058e+08	1.0034e+08	1.27836e+08	5.61756e+07	6.3599e+07	2.92161e+07	6.56944e+07	5.82388e+07	3.16692e+07	2.48647e+07	2.35573e+07	4.19689e+07	3.31662e+07	1.13564e+07
V715	HESI(+)	714.507	5.63	4.75	M+H	PC(13:1_18:2)	PC 31:3	1.8638e+08	4.62093e+07	3.95469e+07	2.77463e+07	1.65098e+07	3.65476e+07	1.04962e+07	7.75576e+06	8.11658e+06	6.2831e+06	3.9428e+06	1.29377e+07	816663	3.91982e+06	6.64608e+06	3.11454e+06	2.57353e+06	2.02493e+06	8.66238e+06	1.13311e+07	9.67467e+06	1.42924e+07	1.10922e+07	6.86243e+06	5.86244e+07	9.89964e+06	8.20442e+06	1.33234e+07	1.52653e+07	2.45099e+07	4.87384e+06	5.44237e+06	4.58184e+06	3.78827e+06	6.74701e+06	5.89991e+06
V716	HESI(+)	714.601	10.09	8.5	M+NH4	DG(20:1_22:5)	DG 42:6	1.24501e+07	1.31139e+07	2.70114e+07	3.07849e+07	1.542e+07	1.05783e+07	3.62238e+07	2.14194e+07	3.77354e+07	5.49273e+07	9.53909e+07	4.26084e+07	1.11994e+08	5.31771e+07	7.74725e+07	1.28999e+08	7.79736e+07	1.20789e+08	1.61676e+07	1.38533e+07	1.15543e+07	9.46458e+06	1.96584e+07	1.62335e+07	4.46435e+07	4.12349e+07	1.96579e+07	3.3177e+07	2.24486e+07	1.76334e+07	1.88787e+08	1.31782e+08	1.01378e+08	211219341	1.04322e+08	7.88345e+07
V717	HESI(+)	714.602	10.02	8.39	M+NH4	TG(O-12:1_6:0_24:5)	TG O-42:6	7.4618e+07	7.10313e+07	1.46828e+08	2.01845e+08	82226053	4.75074e+07	2.9197e+08	1.67208e+08	2.57344e+08	3.05687e+08	6.83607e+08	3.18944e+08	7.07715e+08	3.50314e+08	6.36698e+08	9.36853e+08	4.9778e+08	7.64044e+08	5.22844e+07	5.87414e+07	4.88746e+07	3.4816e+07	7.14456e+07	6.6702e+07	3.27578e+08	2.1682e+08	130155088	2.16944e+08	1.42143e+08	1.27613e+08	1313486143	9.94714e+08	6.77234e+08	1058997892	6.71206e+08	512511041
V718	HESI(+)	714.602	10.25	8.77	M+NH4	DG(18:1_24:5)	DG 42:6	930316	1.22045e+06	4.09772e+06	4.36091e+06	3.06297e+06	1.27701e+06	1.9253e+07	1.25472e+07	2.04159e+07	2.34494e+07	5.588e+07	3.06851e+07	5.69939e+07	5.60845e+07	5.25661e+07	7.68564e+07	5.57738e+07	1.01594e+08	823635	1.52729e+06	938707	439894	793899	540534	1.83965e+07	1.39457e+07	6.46142e+06	1.44975e+07	4.93122e+06	5.08351e+06	7.40419e+07	9.33491e+07	6.65825e+07	8.69246e+07	8.68212e+07	9.80936e+07
V719	HESI(+)	714.606	10.42	9.05	M+NH4	DG(20:1_22:5)	DG 42:6	1.24217e+08	1.02805e+08	3.47694e+07	3.40691e+07	1.03793e+08	8.02272e+07	4.46609e+07	2.38399e+07	2.26841e+07	2.44909e+07	6.86856e+07	2.52438e+07	3.27402e+07	3.652e+07	3.39554e+07	4.66684e+07	2.55134e+07	3.33462e+07	7.55031e+06	1.21241e+07	1.10885e+07	8.49993e+06	1.54144e+07	1.42934e+07	1.91624e+08	1.78504e+07	1.28231e+07	1.27049e+07	9.97198e+06	1.13569e+07	3.5767e+07	4.0977e+07	2.85186e+07	4.35979e+07	2.66197e+07	2.75813e+07
V720	HESI(+)	714.606	9.84	8.09	M+NH4	CE(22:6)	CE 22:6	2.81327e+07	3.44849e+07	9.96381e+07	1.40845e+08	1.22471e+08	4.44673e+07	9.10574e+07	1.13772e+08	1.18331e+08	1.35885e+08	2.99844e+08	1.28679e+08	3.03141e+08	2.81782e+08	1.38217e+08	2.87117e+08	8.98183e+07	1.31254e+08	4.52652e+07	9.25194e+07	6.58236e+07	5.66762e+07	1.05554e+08	9.20867e+07	1.5573e+08	1.29649e+08	9.21571e+07	1.03337e+08	9.99565e+07	3.43895e+07	1.18768e+08	123105197	2.24117e+08	3.55633e+08	9.7927e+07	4.98616e+07
V721	HESI(+)	714.62	12.76	11.68	M+NH4	CE(22:6)-2	CE 22:6	4.08166e+07	3.03825e+07	3.01829e+07	3.38717e+07	3.02308e+07	1.63143e+07	7.4677e+07	4.9301e+08	1.16293e+08	1.11775e+08	6.45282e+07	5.07073e+07	1.47959e+07	2.15375e+07	8.34293e+06	9.86897e+06	1.13768e+07	1.23486e+07	2.08677e+06	17175269	2.26288e+06	2.73119e+06	1.51137e+06	0	6.34555e+07	2.2571e+07	2.21722e+07	1.7465e+07	2.5373e+07	4.37772e+08	2.62166e+07	1.98287e+07	1.75127e+07	1.17817e+07	8.53466e+06	2.62326e+07
V722	HESI(+)	715.527	8.86	6.75	M+Na	DG(20:3_22:5)	DG 42:8	8.99262e+07	1.32425e+08	8.33752e+07	9.66161e+07	1.49705e+08	9.32755e+07	7.67686e+07	5.62562e+07	9.40884e+07	1.0722e+08	1.7456e+08	5.71408e+07	1.48582e+08	1.37851e+08	8.35856e+07	1.30809e+08	7.64128e+07	6.62752e+07	8.66932e+07	122946476	8.96141e+07	7.92207e+07	206855872	2.18107e+08	2.07689e+08	3.9542e+07	4.90774e+07	5.19638e+07	8.44489e+07	1.47625e+07	8.42797e+07	5.31939e+07	7.13256e+07	1.17687e+08	6.05972e+07	9.02541e+06
V723	HESI(+)	715.527	9.12	7.05	M+Na	DG(20:2_22:6)	DG 42:8	1.03699e+06	1.28124e+06	1.45078e+06	2.10729e+06	4.61134e+06	1.9418e+06	1.48827e+06	858863	1.52721e+06	5.08218e+06	7.05925e+06	3.01571e+06	2.77834e+07	2.20424e+07	2.04129e+07	3.65699e+07	2.33186e+07	7.23152e+06	3.80614e+06	3.07976e+06	3.64695e+06	203866	7.93761e+06	7.25773e+06	3.18884e+06	3.22524e+06	1.76601e+06	3.55152e+06	2.42793e+06	2.16644e+06	8.96382e+06	4.48372e+06	1.05956e+07	2.07596e+07	5.71449e+06	2.23239e+06
V724	HESI(+)	715.586	11.57	10.63	M+Na	TG(6:0_16:0_18:1)	TG 40:1	3.64516e+07	2.40359e+06	8.81931e+06	1.28206e+07	5.84538e+06	2.26317e+07	4.07006e+06	1.51703e+06	3.29453e+06	4.40599e+06	6.49178e+06	1.25964e+07	7.38424e+06	4.53682e+06	1.09447e+07	1.34559e+07	3.06804e+07	1.7526e+07	3.6387e+06	1.71183e+06	8.78688e+06	5.73422e+06	4.18459e+06	1.68967e+06	2.96393e+06	1.63023e+07	6.09151e+06	2.11375e+07	1.23178e+07	1.45739e+07	2.84208e+07	2.2305e+07	1.78592e+07	4.35456e+07	3.03757e+07	1.69521e+07
V725	HESI(+)	716.521	6.21	5	M+H	PC(13:1_18:1)	PC 31:2	784005	1.47646e+07	2.51099e+06	2.67657e+06	4.75689e+06	855542	980957	1.86814e+06	2.1184e+07	2.30405e+06	4.12502e+06	4.49655e+06	676525	1.71539e+06	7.1033e+06	3.98193e+06	956487	3.64468e+06	147811	7.9301e+06	1.31544e+07	9.1481e+06	4.03242e+06	2.11906e+06	281173	2.33703e+06	5.07016e+06	8.87493e+06	8.12401e+06	3.68248e+06	86644	620367	5.06749e+06	1.32021e+06	2.35709e+06	184244
V726	HESI(+)	716.522	7.97	5.94	M+H	PE(16:1_18:1)	PE 34:2	4.84172e+07	6.40469e+07	1.98135e+07	9.8415e+06	1.73326e+07	2.66769e+07	3.89486e+06	1.88648e+06	1.98105e+06	6.35946e+06	1.43948e+06	162287	3.84098e+06	2.55662e+06	1.32321e+07	8.18153e+06	9.36714e+06	6.43206e+06	2.21998e+07	1.44176e+07	1.24714e+07	2.94831e+07	1.8258e+07	1.09951e+07	2.76956e+07	9.0196e+06	9.43656e+06	581844	6.57844e+06	199786	1.83835e+06	1.60294e+06	3.47481e+06	4.69505e+06	6.31592e+06	1.56902e+06
V727	HESI(+)	716.522	7.75	5.79	M+H	PE(16:0_18:2)	PE 34:2	2163899894	1687952761	4.77304e+08	5.8312e+08	9.27912e+08	1361324749	3.26687e+08	3.49097e+08	2.63869e+08	2.52724e+08	2.01265e+08	1.45043e+08	1.82736e+08	388735452	3.53448e+08	2.64938e+08	4.06158e+08	1.70111e+08	4.81322e+08	8.00956e+08	8.35404e+08	8.42292e+08	5.47955e+08	639107035	9.02678e+08	4.30246e+08	6.32859e+08	1.83537e+08	3.15676e+08	1.87066e+08	5.77767e+08	272249491	3.76331e+08	5.03483e+08	3.73485e+08	1.10378e+08
V728	HESI(+)	716.558	7.1	5.41	M+H	PC(O-16:0_16:2)	PC O-32:2	4.23449e+07	4.20635e+07	4.55877e+07	4.78681e+07	1.82918e+07	3.18707e+07	1.2486e+07	8.70326e+06	1.87318e+07	1.05125e+07	1.10165e+07	7.80131e+06	7.27985e+06	7.05402e+06	1.59574e+07	1.80861e+07	3.04536e+07	8.7454e+06	1.68754e+07	1.7492e+07	1.38227e+07	2.25155e+07	1.63284e+07	1.5228e+07	6.26762e+06	1.09265e+07	7.96513e+06	8.91961e+06	1.29197e+07	9.45763e+06	5.83707e+06	6.89804e+06	6.60976e+06	1.14526e+07	1.20436e+07	1.7583e+07
V729	HESI(+)	716.617	10.67	9.45	M+NH4	DG(20:1_22:4)	DG 42:5	3.89251e+07	3.92696e+07	2.66549e+07	3.11851e+07	5.21261e+07	2.71132e+07	3.88787e+07	3.10139e+07	3.54496e+07	3.48759e+07	5.77546e+07	3.30515e+07	7.78129e+06	6.41709e+06	7.80187e+06	9.27801e+06	7.31459e+06	1.1325e+07	1.2152e+07	1.37169e+07	1.03003e+07	8.12303e+06	9.6177e+06	1.26971e+07	5.74284e+07	3.3526e+07	2.18943e+07	2.09604e+07	1.84679e+07	2.06902e+07	8.54771e+06	1.38475e+07	8.8401e+06	1.14797e+07	8.50017e+06	9.89511e+06
V730	HESI(+)	716.618	10.64	9.4	M+NH4	TG(O-17:1_5:0_20:4)	TG O-42:5	4.05009e+07	4.05216e+07	2.59648e+07	3.1584e+07	5.48823e+07	2.8473e+07	3.96123e+07	3.21717e+07	3.59714e+07	3.63371e+07	6.03439e+07	2.84781e+07	1.42566e+07	3.31797e+07	1.60251e+07	1.75765e+07	1.28341e+07	2.07246e+07	1.31747e+07	1.61002e+07	1.06057e+07	8.46019e+06	9.67238e+06	1.28532e+07	5.94561e+07	3.35274e+07	2.37353e+07	2.19766e+07	1.76605e+07	2.06578e+07	1.78646e+07	2.69152e+07	1.70853e+07	2.25624e+07	1.64791e+07	1.8802e+07
V731	HESI(+)	716.621	10.45	9.1	M+NH4	DG(18:1_24:4)	DG 42:5	3.37351e+07	3.26023e+07	1.29639e+07	1.86014e+07	1.39197e+07	2.43294e+07	1.50535e+08	1.39876e+08	5.1656e+07	1.71862e+08	9.84816e+07	5.81754e+07	1.04093e+08	3.35734e+08	328395461	1.30822e+08	2.27297e+08	9.7266e+07	3.25509e+07	4.22115e+07	2.8929e+07	2.29772e+07	3.38927e+07	1.57472e+07	1.50463e+08	4.38164e+07	3.11621e+07	3.25216e+07	1.94496e+07	5.04804e+07	9.93181e+07	4.62559e+08	7.2198e+07	1.49668e+08	7.26783e+07	7.16178e+07
V732	HESI(+)	717.541	9.79	8.01	M+Na	TG(O-16:1_4:0_22:6)	TG O-42:7	7.18163e+06	1.2977e+07	2.22927e+07	1.84877e+07	2.27965e+07	1.40036e+07	2.89394e+07	1.62292e+07	1.77406e+07	3.14933e+07	7.65397e+07	2.57654e+07	1.02072e+08	8.16058e+07	7.30628e+07	1.28439e+08	7.24582e+07	1.02726e+08	1.04965e+07	5.56506e+07	8.79675e+06	5.04548e+06	1.06263e+07	1.18255e+07	4.12307e+07	2.59958e+07	1.03277e+07	2.66427e+07	1.76209e+07	1.44148e+07	9.40526e+07	8.27459e+07	7.37469e+07	1.54351e+08	1.20049e+08	8.21973e+07
V733	HESI(+)	717.542	9.48	7.54	M+Na	DG(20:3_22:4)	DG 42:7	312560102	3.57358e+08	4.96716e+08	600926140	4.39748e+08	260548623	6.05721e+08	411167223	7.3398e+08	749259341	1431908609	701943872	1874587177	989299657	1412338172	1758262730	1204682437	1297781786	3.21862e+08	3.36918e+08	3.17293e+08	2.63333e+08	4.0499e+08	4.41218e+08	8.10298e+08	5.17831e+08	3.30865e+08	580010539	4.93752e+08	1.90713e+08	1788331695	1465849075	1330455590	2061986873	1426306020	617937232
V734	HESI(+)	717.542	9.56	7.64	M+Na	TG(O-14:2_6:0_22:5)	TG O-42:7	3.04282e+07	4.54892e+07	4.45722e+07	5.7776e+07	4.30948e+07	2.88425e+07	4.18126e+07	3.47239e+07	6.58289e+07	9.24026e+07	1.57637e+08	5.78305e+07	213312871	1.07471e+08	1.18285e+08	133498569	1.09385e+08	1.74292e+08	3.58997e+07	4.86508e+07	2.60825e+07	2.39442e+07	4.89633e+07	5.48633e+07	9.98349e+07	5.32937e+07	4.41869e+07	5.52023e+07	5.4897e+07	1.92631e+07	2.25636e+08	9.94388e+07	1.16925e+08	2.84836e+08	1.77736e+08	7.18773e+07
V735	HESI(+)	717.542	9.28	7.25	M+Na	DG(18:2_24:5)	DG 42:7	1.77916e+07	2.76644e+07	3.2834e+07	4.01296e+07	6.74274e+07	2.94055e+07	1.73105e+07	1.79211e+07	2.65465e+07	3.39686e+07	6.14343e+07	2.3849e+07	4.27227e+07	6.03297e+07	1.6263e+07	1.89486e+07	1.14005e+07	8.37764e+06	2.89685e+07	4.34817e+07	3.9869e+07	3.50067e+07	1.04547e+08	8.55541e+07	3.67307e+07	1.82197e+07	2.0886e+07	1.70836e+07	1.91201e+07	2.56456e+06	2.1573e+07	7.68746e+06	2.34132e+07	4.98698e+07	5.82867e+06	2.26004e+06
V736	HESI(+)	717.546	10.02	8.39	M+Na	DG(20:1_22:6)	DG 42:7	0	133990	364294	297354	180351	262451	624288	106821	53383	257270	412329	806654	6.70993e+06	2.38849e+06	4.28574e+06	4.62464e+06	1.11965e+06	1.24842e+06	56494	158005	246407	838706	121144	312808	537215	190923	928787	1.83268e+06	1.12951e+06	582440	8920.02	966137	377300	497122	3.95668e+06	468404
V737	HESI(+)	718.477	2	1.84	M+H	PC(P-15:2-18:5)	PC O-33:8	4.5173e+06	5.20337e+06	3.91982e+06	4.49385e+06	2.22801e+06	7.21982e+06	2.03011e+07	2.86998e+07	1.25663e+07	1.23764e+07	4.56794e+06	2.86624e+07	4.96151e+06	6.54122e+06	5.56663e+06	2.79257e+06	4.47465e+06	9.01588e+06	2.79315e+06	8.34424e+06	8.23361e+06	7.1348e+06	6.15994e+06	2.30818e+06	4.14518e+06	1.12743e+07	9.2975e+06	9.94578e+06	3.0772e+07	6.24789e+06	3.93523e+06	3.72514e+06	1.52566e+06	2.06927e+06	3.36985e+06	1.92115e+06
V738	HESI(+)	718.504	3.31	3.16	M+H	PE(16:0_18:1)	PE 34:1	6.46996e+06	9.06554e+06	3.27029e+06	2.96573e+06	4.06682e+06	3.29189e+06	9.85291e+06	1.05455e+07	7.50821e+06	7.60747e+06	3.22805e+06	4.10736e+06	3.2785e+06	1.07238e+07	3.81691e+06	2.96583e+06	3.19595e+06	6.3881e+06	6.69956e+06	6.8852e+06	1.19342e+07	9.74421e+06	1.02771e+07	8.11687e+06	4.70926e+06	8.14127e+06	1.01143e+07	8.49542e+06	8.79321e+06	6.65784e+06	6.40167e+06	3.82504e+06	5.62934e+06	6.21858e+06	4.21403e+06	5.09221e+06
V739	HESI(+)	718.536	7.07	5.4	M+H	PC(15:1_16:0)	PC 31:1	1.02935e+07	1.41087e+07	1.53104e+06	3.8179e+06	5.93852e+06	2.12522e+06	4.45002e+06	8.89954e+06	8.74582e+06	1.82e+06	2.02686e+06	4.11256e+06	2.49965e+06	7.21539e+06	1.01963e+07	2.48305e+06	3.37464e+06	1.2031e+06	1.66367e+06	1.28967e+07	4.61677e+06	6.66806e+06	5.13169e+06	1.36938e+06	8.3412e+06	9.8783e+06	8.40737e+06	3.69466e+06	1.77111e+06	4.50564e+06	5.92814e+06	7.30465e+06	1.24248e+07	2.74323e+06	5.62e+06	825425
V740	HESI(+)	718.54	8.47	6.35	M+H	PE(16:1_18:0)	PE 34:1	1.11246e+08	8.07755e+07	7.81155e+07	1.21926e+08	6.37493e+07	6.27315e+07	2.98677e+06	432732	1.8411e+06	1.36983e+06	5.27142e+06	6.12354e+06	6.09887e+06	5.44695e+06	5.30525e+07	2.02661e+07	5.05184e+07	1.13163e+07	1.67911e+07	1.57832e+07	3.339e+07	1.00598e+07	1.21454e+06	2.26031e+07	7.50207e+07	853140	1.0385e+06	616787	3.1497e+06	3.31084e+06	5.75155e+07	2.96232e+06	1.60999e+07	2.61815e+07	8.78413e+06	6.05737e+06
V741	HESI(+)	718.54	7.12	5.42	M+H	PE(18:1_16:0)	PE 34:1	4.40521e+07	7.70943e+06	2.03063e+07	1.97831e+07	1.03411e+07	1.46175e+07	1.76647e+07	4.52719e+07	3.72341e+06	176425	3.87993e+06	1.12566e+07	7.84407e+06	4.99532e+06	1.9033e+06	1.46579e+06	1.16627e+07	1.85739e+06	7.0207e+06	6.15809e+07	3.33908e+06	1.01114e+07	6.09054e+06	4.67947e+06	2.73229e+07	6.31717e+07	1.90427e+06	6.90997e+06	1.22354e+06	7.81129e+06	2.0676e+07	3.8221e+07	2.18952e+06	2.05181e+06	5.5282e+06	64464.9
V742	HESI(+)	718.54	6.79	5.26	M+H	PC(13:1_18:0)	PC 31:1	2.71567e+08	1.94327e+08	4.07814e+08	3.30865e+08	2.18464e+08	2.86873e+08	6.8201e+07	3.55272e+07	6.04665e+07	5.10239e+07	1.00133e+08	6.17985e+07	1.40937e+07	3.65906e+07	4.42271e+07	4.05183e+07	3.18341e+07	2.5848e+07	1.26619e+08	7.24356e+07	9.56182e+07	1.65764e+08	6.74535e+07	5.66999e+07	1.94359e+08	7.75456e+07	7.6239e+07	3.19668e+07	7.9171e+07	2.19962e+08	4.49354e+07	5.68965e+07	4.94284e+07	7.45856e+07	5.9728e+07	2.01315e+07
V743	HESI(+)	718.577	8.62	6.49	M+H	PC(O-16:0_16:1)	PC O-32:1	2.81728e+08	2.49043e+08	2.0473e+08	2.59103e+08	2.69531e+08	2.36801e+08	2.23182e+08	2.15156e+08	2.19992e+08	2.04822e+08	1.83847e+08	1.73183e+08	8.0528e+07	1.63581e+08	1.56949e+08	1.42931e+08	1.47308e+08	1.05661e+08	2.55692e+08	5.2219e+08	3.86565e+08	4.25558e+08	3.37468e+08	2.94459e+08	3.25439e+08	2.21346e+08	2.53982e+08	1.87221e+08	2.90674e+08	3.32518e+08	122550232	1.4846e+08	9.6235e+07	1.42582e+08	7.59987e+07	5.4227e+07
V744	HESI(+)	718.636	11.32	10.33	M+NH4	DG(18:1_24:3)	DG 42:4	1.93818e+07	1.15529e+07	4.94111e+06	3.57226e+06	1.27484e+07	1.73747e+07	2.44732e+06	3.04948e+06	2.2459e+06	2.78706e+06	4.39921e+06	1.60876e+06	835829	2.18862e+06	994242	699046	0	1.53883e+06	1.73753e+06	1.04961e+06	1.48039e+06	1.08932e+06	1.56525e+06	958483	1.61335e+07	1.58063e+06	430220	1.31146e+06	1.0858e+06	1.81413e+06	2.90981e+06	2.37723e+06	533480	590297	2.0342e+06	2.83059e+06
V745	HESI(+)	718.636	10.9	9.79	M+NH4	TG(O-13:1_5:0_24:3)	TG O-42:4	1.27404e+07	9.90632e+06	1.20495e+07	1.327e+07	2.36181e+07	3.92761e+06	1.94496e+07	1.89092e+07	2.04034e+07	2.04458e+07	4.12775e+07	2.84388e+07	3.02793e+07	2.77158e+07	4.35267e+07	3.45189e+07	2.36278e+07	6.45846e+07	6.27491e+06	8.33715e+06	2.6678e+06	2.78412e+06	1.31216e+06	5.85354e+06	2.16399e+07	1.82647e+07	1.32094e+07	1.64687e+07	1.35449e+07	1.29157e+07	7.66693e+07	7.90435e+07	3.65348e+07	5.91339e+07	6.66713e+07	6.267e+07
V746	HESI(+)	719.56	10.02	8.4	M+Na	TG(P-18:0_2:0_22:5)	TG O-42:6	5.5944e+07	5.83865e+07	1.26231e+08	1.62139e+08	6.29293e+07	4.51038e+07	1.84467e+08	1.20372e+08	2.01349e+08	2.41484e+08	5.328e+08	253116281	668018324	290527351	4.76197e+08	7.0318e+08	3.97963e+08	6.57711e+08	4.78885e+07	5.16477e+07	3.85585e+07	1.79123e+07	6.22196e+07	6.74283e+07	226487243	1.34234e+08	1.0067e+08	1.76785e+08	119350975	9.67005e+07	7.10782e+08	6.30065e+08	4.88249e+08	7.36893e+08	5.2641e+08	376998474
V747	HESI(+)	719.569	6.69	5.21	M+H	SM(t18:0_16:1)	phSM 34:1	877220	10422.4	980031	2.62376e+06	2.974e+06	3.7443e+06	2.28745e+06	0	1.30301e+06	0	0	1.37845e+06	3.11582e+06	1.0432e+07	1.70752e+07	8.90502e+06	7.42858e+06	1.86997e+07	6.89951e+06	9.24581e+06	7.85565e+06	1.56359e+07	1.56442e+06	7.38364e+06	483971	5.48213e+06	4.64208e+06	4.35798e+06	1.44308e+06	2.79521e+06	1.54055e+07	3.33884e+07	3.33843e+06	1.61086e+07	1.79444e+07	2.35028e+06
V748	HESI(+)	720.554	7.61	5.69	M+H	PC(15:0_16:0)	PC 31:0	1.71691e+08	1.36285e+08	121623239	1.83151e+08	1.48277e+08	100783831	6.31268e+07	8.49008e+07	8.61503e+07	4.0961e+07	4.36254e+07	4.31573e+07	4.12888e+07	6.64857e+07	8.55727e+07	7.57109e+07	7.42367e+07	5.12681e+07	1.0807e+08	1.59375e+08	1.20508e+08	1.70176e+08	1.62919e+08	1.15981e+08	1.33262e+08	1.19862e+08	1.06509e+08	9.2484e+07	1.05324e+08	1.24517e+08	1.52163e+08	1.08195e+08	7.53318e+07	1.3776e+08	8.97597e+07	3.52862e+07
V749	HESI(+)	720.591	8.66	6.53	M+H	PC(O-16:0_16:0)	PC O-32:0	1059031669	9.68093e+08	1412404049	1726465778	1143891087	1070321862	1212969460	8.06582e+08	1126317954	9.75177e+08	8.41409e+08	9.03963e+08	4.6939e+08	8.50594e+08	9.8863e+08	9.37976e+08	1090448906	6.00845e+08	1063599244	1754472828	1413553719	1694248246	1269684980	1207201832	1172179931	1265599586	1218445918	1062678395	1309314422	1226473037	1003436776	9.78018e+08	8.14485e+08	8.68727e+08	683083450	4.3305e+08
V750	HESI(+)	720.614	10.88	9.76	M+NH4	TG(5:0_18:1_18:2)	TG 41:3	1.33163e+07	8.38162e+06	5.16342e+07	6.07485e+07	6.08301e+07	3.00598e+07	5.60014e+07	3.15427e+07	1.00218e+08	7.73358e+07	1.53546e+08	9.64285e+07	1.03371e+07	8.32445e+06	6.36717e+06	4.88954e+06	3.36622e+06	1.39903e+07	5.4738e+07	5.37577e+07	4.00695e+07	4.75825e+07	9.69057e+07	4.42467e+07	2.19437e+07	5.08577e+07	4.11138e+07	7.55071e+07	9.24326e+07	2.31524e+07	6.49675e+06	2.24013e+06	5.45269e+06	5.98209e+06	2.85348e+06	1.77411e+06
V751	HESI(+)	720.618	11.13	10.1	M+NH4	TG(23:2_9:1_9:0)	TG 41:3	3.83237e+06	519950	8.05002e+06	1.00594e+07	5.00036e+06	4.78093e+06	8.22718e+06	7.51592e+06	2.7005e+07	2.07996e+07	4.05967e+07	4.1211e+07	2.7567e+06	876308	1.80684e+06	1.51733e+06	1.32214e+06	8.04902e+06	6.93221e+06	6.06983e+06	1.1423e+07	9.45235e+06	7.47971e+06	5.35359e+06	6.91259e+06	2.59131e+07	1.00011e+07	3.21764e+07	3.00454e+07	4.7662e+06	3.86662e+06	1.19331e+06	2.03745e+06	2.55302e+06	511673	1.91982e+06
V752	HESI(+)	720.65	11.37	10.39	M+NH4	DG(15:2_27:1)	DG 42:3	5.84633e+07	4.31267e+07	2.74072e+07	2.85301e+07	6.63826e+07	5.39753e+07	2.66911e+07	1.89399e+07	1.97203e+07	23804062	4.62536e+07	1.69635e+07	5.75818e+06	8.75566e+06	1.07931e+07	7.86713e+06	9.86381e+06	8.83735e+06	9.01572e+06	1.06427e+07	7.31098e+06	4.45039e+06	1.24184e+07	9.7719e+06	3.41384e+07	1.05121e+07	8.09397e+06	7.81836e+06	7.6073e+06	1.3507e+07	1.13878e+07	1.46215e+07	6.22759e+06	7.01944e+06	8.41426e+06	3.72588e+06
V753	HESI(+)	722.438	2.35	2.2	M+H	PS(P-16:3_17:3)	PS O-33:7	2.2499e+07	2.49708e+07	1.29137e+07	1.57064e+07	1.62292e+07	1.502e+07	1.32437e+08	1.54285e+08	6.37088e+07	7.01327e+07	4.09302e+07	8.13752e+07	4.2301e+07	3.46572e+07	2.68102e+07	4.21412e+07	5.50005e+07	4.164e+07	1.22983e+07	2.41114e+07	2.2299e+07	1.34782e+07	2.83305e+07	1.45385e+07	4.44411e+07	6.5817e+07	5.69594e+07	4.71968e+07	9.57101e+07	2.05357e+07	2.3024e+07	2.47354e+07	2.95423e+07	1.74259e+07	2.48243e+07	3.11565e+07
V754	HESI(+)	722.511	9.87	8.15	M+H	PE(O-18:4_18:2)	PE O-36:6	5751522983	5442381299	5595526222	4945443819	5307217200	7100374717	4459059850	5733682603	4825312199	5046456871	4615463222	5075695806	4383760782	4218515219	3339837675	3451461317	2711730322	3764479533	4126699976	3925076413	4187477292	5107129534	4342004212	4383563999	3611480647	3807760815	4699675950	5055616419	4201143302	5679443792	1967210071	2323830234	2971481328	2774844646	3552004762	3399494627
V755	HESI(+)	722.631	11.39	10.42	M+NH4	TG(5:0_18:1_18:1)	TG 41:2	2.15796e+07	9.62815e+06	6.01542e+07	6.06296e+07	4.15153e+07	1.4739e+08	6.7855e+07	5.34833e+07	1.12551e+08	8.02657e+07	1.96322e+08	1.27975e+08	1.81437e+07	2.19705e+07	1.45507e+07	8.77918e+06	8.0277e+06	4.05712e+07	4.62947e+07	4.64719e+07	3.86157e+07	4.22031e+07	5.83251e+07	2.91416e+07	2.52837e+07	6.92413e+07	5.06224e+07	9.02358e+07	1.014e+08	3.29082e+07	1.67012e+07	8.44832e+06	1.1712e+07	1.35004e+07	1.24066e+07	1.27863e+07
V756	HESI(+)	722.668	11.83	10.9	M+NH4	DG(24:0_18:2)	DG 42:2	2.08452e+07	1.61933e+07	1.07693e+07	1.04849e+07	2.33689e+07	1.40892e+07	1.4318e+07	7.69133e+06	8.48169e+06	1.06013e+07	2.32903e+07	1.05564e+07	1.61583e+06	3.02203e+06	6.64724e+06	3.14913e+06	5.46324e+06	2.60357e+06	2.45712e+06	2.55656e+06	1.7017e+06	440435	1.57079e+06	2.42245e+06	1.97751e+07	3.09724e+06	3.94703e+06	3.49855e+06	3.33211e+06	3.32537e+06	5.74866e+06	7.18148e+06	2.60091e+06	1.69745e+06	3.53866e+06	628906
V757	HESI(+)	723.543	6.13	4.97	M+H	SM(d18:2_18:3)	SM 36:5	6.54016e+07	3.93233e+07	8.24453e+07	9.15887e+07	7.24273e+07	8.00414e+07	6.23437e+07	8.03074e+07	5.66397e+07	5.49933e+07	5.16025e+07	5.85602e+07	5.55372e+07	4.9159e+07	3.75926e+07	5.19475e+07	3.49139e+07	4.07982e+07	172124550	1.5216e+08	9.9793e+07	1.21956e+08	1.5668e+08	1.55989e+08	8.06806e+07	7.13662e+07	9.61323e+07	1.37494e+08	1.18811e+08	1.15612e+08	4.08766e+07	4.68586e+07	4.13038e+07	6.39454e+07	3.03772e+07	3.74849e+07
V758	HESI(+)	724.528	8.24	6.15	M+H	PE(P-16:0_20:4)	PE O-36:5	1.4702e+08	1.45271e+08	163119900	1.94814e+08	1.70496e+08	1.49257e+08	1.58179e+08	1.73789e+08	1.71262e+08	1.38687e+08	1.70755e+08	1.32363e+08	1.11279e+08	1.8139e+08	1.87699e+08	1.71055e+08	1.97089e+08	8.74796e+07	1.7496e+08	2.35373e+08	1.88509e+08	1.4548e+08	166727213	209113222	1.21293e+08	1.7739e+08	1.09594e+08	125225320	1.41721e+08	178800199	1.90734e+08	2.67415e+08	1.20848e+08	1.99329e+08	1.82174e+08	5.69633e+07
V759	HESI(+)	724.644	11.9	10.96	M+NH4	TG(7:0_16:0_18:1)	TG 41:1	8.9238e+06	7.56748e+06	2.38841e+07	2.58913e+07	9.65319e+06	1.53415e+07	1.35475e+07	3.29848e+07	2.6127e+07	2.01859e+07	2.1761e+07	2.94164e+07	6.69779e+06	1.40595e+07	2.40079e+06	4.2147e+06	764424	9.29099e+06	8.69354e+06	9.42402e+06	1.26512e+07	1.52744e+07	1.28649e+07	6.44837e+06	9.54615e+06	5.78546e+06	2.25619e+07	8.3282e+06	1.01332e+07	3.53354e+07	1.89914e+06	4.9986e+06	4.53764e+06	2.79054e+06	5.84215e+06	6.2754e+06
V760	HESI(+)	725.555	7.04	5.38	M+H	SM(d18:1_18:3)	SM 36:4	4.13654e+08	4.34295e+08	3.8082e+08	6.35005e+08	3.95074e+08	2.88812e+08	7.13676e+08	1305749511	7.37851e+08	7.63056e+08	4.84318e+08	6.38771e+08	3.88234e+08	1903133951	1605167482	1369776217	7.94388e+08	5.54516e+08	5.20349e+08	1237593516	8.55562e+08	8.52997e+08	7.03518e+08	6.83003e+08	6.49039e+08	1067736720	1445046909	6.26668e+08	7.8293e+08	6.59135e+08	1246606956	1522168037	2183217028	1738245403	9.7606e+08	634300230
V761	HESI(+)	725.569	10.89	9.77	M+Na	TG(5:0_18:1_18:2)	TG 41:3	6.29244e+06	3.01993e+06	2.28134e+07	2.59461e+07	2.76873e+07	1.50687e+07	2.59297e+07	1.42686e+07	5.02e+07	4.21472e+07	8.51868e+07	4.94515e+07	4.53698e+06	4.29424e+06	2.81169e+06	2.88967e+06	2.64317e+06	7.88777e+06	2.4878e+07	2.0854e+07	1.67145e+07	2.16651e+07	3.76817e+07	1.90361e+07	1.04169e+07	2.13552e+07	1.63989e+07	3.15931e+07	3.50215e+07	7.15372e+06	2.61859e+06	932320	2.55955e+06	2.90562e+06	1.30539e+06	869776
V762	HESI(+)	725.606	11.03	9.96	M+H	DG(22:5_22:1)	DG 44:6	1.52538e+06	5.69882e+06	1.19113e+07	4.819e+06	1.10134e+07	6.2927e+06	5903746	8.1951e+06	5.68151e+06	4.99866e+06	2.99369e+06	6.3852e+06	263023	225850	464912	559291	8388.77	373591	9.09854e+06	2.35245e+07	8.22843e+06	2.69307e+06	2.58826e+07	1.46176e+07	4.43557e+06	2.00796e+07	2.47783e+07	1.40021e+07	2.40076e+07	8.0589e+06	180774	655469	217179	271956	328029	246566
V763	HESI(+)	726.505	5.58	4.72	M+H	PC(16:1_16:3)	PC 32:4	2.21265e+07	2.90915e+07	3.16396e+07	3.86151e+07	2.55618e+07	1.98335e+07	5.31289e+07	4.18536e+07	3.05305e+07	3.5436e+07	4.32456e+07	3.60998e+07	2.70948e+07	2.41902e+07	2.60103e+07	2.17395e+07	1.63228e+07	2.14299e+07	1.15449e+07	1.50107e+07	1.21851e+07	1.65027e+07	1.5428e+07	1.22617e+07	2.14557e+07	3.48492e+07	3.44267e+07	2.10905e+07	3.2144e+07	3.85216e+07	8.60401e+06	1.31418e+07	2.50142e+07	1.94762e+07	1.22501e+07	1.6394e+07
V764	HESI(+)	726.506	6.24	5.02	M+Na	PC(16:1_14:0)	PC 30:1	8.36037e+07	1.30087e+08	1.79494e+08	2.22782e+08	8.94669e+07	1.22775e+08	3.68187e+07	2.11484e+07	3.80374e+07	3.01536e+07	3.68362e+07	2.81587e+07	1.44824e+07	1.34694e+07	1.67344e+07	1.50645e+07	2.521e+07	3.29195e+07	8.96119e+07	4.46493e+07	1.0276e+08	1.1601e+08	3.71781e+07	2.96309e+07	6.00872e+07	3.37887e+07	3.51521e+07	4.32765e+07	6.38242e+07	1.03679e+08	1.18561e+07	2.17718e+07	2.20599e+07	4.903e+07	3.64193e+07	4.26441e+07
V765	HESI(+)	726.539	8.32	6.21	M+H	PE(P-16:0_20:3)	PE O-36:4	141907	228787	563909	147829	1.36994e+06	274318	1.69916e+06	2.75146e+06	3.50252e+06	1.77787e+06	3.64349e+06	1.05474e+06	723870	1.70306e+06	155227	2.14712e+06	97883.1	679740	2.46335e+06	3.09587e+06	427706	146329	2.45029e+06	4.2709e+06	110358	548722	382730	1.98671e+06	872955	985598	6.21042e+06	198183	122574	339857	0	0
V766	HESI(+)	727.464	2	1.83	M+Na	PEt(O-14:2_22:5)	PEt O-36:7	1.7396e+07	1.78496e+07	6.901e+06	1.28429e+07	6.55964e+06	4.67146e+06	11486467	1.41447e+07	1.55347e+07	1.79726e+07	1.49379e+07	1.05016e+07	1.89511e+07	2.62352e+07	2.20543e+07	3.18e+07	2.05638e+07	2.51478e+07	1.33656e+07	1.57046e+07	4.90169e+06	5.25144e+06	2.3634e+07	2.11905e+06	1.59194e+07	1.31791e+07	9.20307e+06	1.17404e+07	1.08458e+07	1.09794e+07	1.7769e+07	2.01701e+07	2.18303e+07	2.03503e+07	1.44162e+07	2.95846e+07
V767	HESI(+)	727.566	10.71	9.51	M+H	Co(Q8)	Co 8:0	2092663955	2199878127	1881438168	2473534437	3413202105	2003512479	1577758926	1299601637	1357642503	1258748835	1229819665	1116506249	9.50327e+07	1.24406e+08	7.276e+07	7.58213e+07	3.45449e+07	6.87594e+07	2224878677	2992667899	3444387534	2854545013	3237600773	2736760178	1055904069	1225187954	1290835623	2160014714	2214696949	1762678462	9.01733e+07	6.76151e+07	9.16158e+07	1.35014e+08	4.48904e+07	258313028
V768	HESI(+)	727.585	11.39	10.41	M+H	TG(9:0_14:1_20:4)	TG 43:5	5.4563e+06	1.76666e+06	2.51689e+07	2.5287e+07	1.78841e+07	8.14825e+07	2.59818e+07	1.37401e+07	5.37087e+07	3.55389e+07	9.90349e+07	5.36052e+07	9.56906e+06	8.734e+06	8.17383e+06	4.57219e+06	5.59608e+06	2.27402e+07	1.74104e+07	1.38083e+07	1.2601e+07	1.49311e+07	1.71775e+07	8.98001e+06	1.40321e+07	2.38215e+07	1.50332e+07	3.70164e+07	3.2173e+07	8.67128e+06	8.61114e+06	5.09358e+06	6.76913e+06	8.62168e+06	7.85471e+06	6.90051e+06
V769	HESI(+)	727.622	11.83	10.9	M+Na	DG(24:0_18:2)	DG 42:2	3.99908e+07	2.86239e+07	1.64582e+07	2.17459e+07	4.05423e+07	2.55107e+07	2.60524e+07	1.31503e+07	1.94929e+07	1.58061e+07	3.62541e+07	1.62551e+07	4.56883e+06	4.17252e+06	9.60783e+06	6.71442e+06	9.64473e+06	6.24835e+06	5.1748e+06	4.54566e+06	2.13533e+06	1.93525e+06	3.20288e+06	5.94734e+06	3.1089e+07	4.69101e+06	4.26921e+06	4.26725e+06	4.70384e+06	6.50499e+06	1.02488e+07	1.21406e+07	6.16277e+06	4.90528e+06	7.25111e+06	2.56365e+06
V770	HESI(+)	728.521	7.06	5.39	M+Na	PC(16:0_14:0)	PC 30:0	9.95122e+07	117003667	1.34115e+08	2.03101e+08	8.84199e+07	6.01137e+07	1.04168e+08	8.76256e+07	1.16823e+08	7.16644e+07	7.40722e+07	4.19218e+07	2.01972e+07	1.14747e+08	1.20984e+08	6.37901e+07	6.3666e+07	3.21551e+07	1.04961e+08	2.1374e+08	2.11013e+08	2.25799e+08	1.03367e+08	1.04047e+08	1.52975e+08	1.58027e+08	1.03047e+08	7.20625e+07	1.54971e+08	1.15917e+08	1.17712e+08	2.40464e+08	1.04236e+08	1.80645e+08	1.13611e+08	5.70081e+07
V771	HESI(+)	728.522	7.09	5.41	M+H	PC(16:0_16:3)	PC 32:3	8.76763e+07	9.94103e+07	122913296	1.82215e+08	7.02542e+07	5.05349e+07	8.63682e+07	7.82257e+07	9.89175e+07	7.94093e+07	6.91664e+07	3.76584e+07	1.79945e+07	1.06431e+08	111915918	5.88389e+07	5.15711e+07	2.79877e+07	9.49549e+07	1.85313e+08	1.88659e+08	2.01116e+08	1.00479e+08	5.46201e+07	1.16595e+08	1.30535e+08	8.74483e+07	6.88995e+07	1.34798e+08	1.03654e+08	1.04811e+08	1.91446e+08	102890702	1.61115e+08	101088329	4.45142e+07
V772	HESI(+)	728.581	10.09	8.5	M+NH4	TG(10:0_10:0_22:6)	TG 42:6	1.46425e+07	0	0	2104.41	0	2.30127e+06	0	527674	0	0	0	2.43468e+06	2.37249e+07	7.80743e+06	1.00387e+07	1.53035e+07	1.8211e+07	1.582e+07	380933	792166	1.77068e+06	1.35373e+06	5.17046e+06	615504	0	9.63623e+06	3.01953e+06	1.14407e+07	6.5961e+06	780224	3.15202e+07	4.75448e+07	2.16464e+07	3.00305e+07	4.56327e+07	1.27926e+07
V773	HESI(+)	729.59	7.29	5.51	M+H	SM(d18:1_18:1)	SM 36:2	2.55532e+07	2.43501e+07	2.25994e+07	2.79574e+07	1.78487e+07	1.90865e+07	3.26365e+07	7.623e+07	5.04691e+07	1.94606e+07	1.52717e+07	1.40404e+07	4.09262e+07	6.49128e+07	5.2939e+07	4.87137e+07	4.88617e+07	2.90167e+07	1.216e+08	2.25294e+08	1.0417e+08	8.63822e+07	1.15119e+08	9.61482e+07	2.08431e+07	7.94758e+07	8.48202e+07	6.30888e+07	7.77816e+07	1.88592e+07	8.84603e+07	7.35257e+07	3.25954e+07	7.1534e+07	3.19426e+07	2.39685e+07
V774	HESI(+)	729.591	7.37	5.55	M+H	SM(d18:1_18:1)	SM 36:2	4.78941e+06	7.97056e+06	3.83999e+06	5.46351e+06	1.63531e+06	6.05777e+06	2.97187e+07	2.10923e+07	1.21104e+07	3.39316e+07	4.56595e+06	1.22742e+07	3.9281e+07	1.46114e+07	4.99278e+07	1.5202e+07	1.48749e+07	2.78079e+07	2.89104e+07	4.0379e+07	2.10215e+07	1.51825e+07	1.82755e+07	2.10454e+07	1.24264e+07	1.67715e+07	2.6196e+07	1.68303e+07	2.52751e+07	9.15384e+06	1.45947e+07	8.77287e+06	2.61867e+07	1.73893e+07	2.19933e+07	7.4581e+07
V775	HESI(+)	730.539	6.48	5.12	M+H	PC(16:1_16:1)	PC 32:2	8465779535	9104806196	9851361971	11557868895	6554811615	9286989967	5680737706	3411936563	4580215587	4066835832	5245028660	4284971297	1699434299	2890269771	2396398060	2243976266	1982357178	3447280356	5302150007	4337532762	7838989803	8910537589	5249215407	3643345132	6085241605	4810321415	4955668864	4372779014	5869179974	7852985169	1881389284	2548623435	2384201092	3220639368	2576787273	3229815747
V776	HESI(+)	730.539	7.88	5.87	M+H	PC(16:0_16:2)	PC 32:2	1.75251e+07	3.7626e+07	1.1125e+07	1.75277e+07	9.19607e+07	3.27724e+07	1.04964e+08	9.5041e+07	4.77587e+07	8.64793e+07	1.0711e+08	5.602e+07	3.67093e+08	9.95871e+08	4.30661e+08	6.01422e+08	301081315	194118185	5.83454e+07	1.27539e+08	1.36008e+08	4.67658e+07	2.13839e+08	2.15051e+08	268415699	6.95018e+07	5.64922e+07	5.44708e+07	8.82951e+07	3.24383e+07	3.63328e+08	6.2312e+08	3.26799e+08	4.11179e+08	2.78121e+08	5.30711e+07
V777	HESI(+)	730.54	7.08	5.4	M+H	PE(17:1_18:1)	PE 35:2	3.22216e+07	1.63496e+07	4.27354e+07	5.87979e+07	2.98956e+07	2.07682e+07	1.20754e+08	8.37256e+07	8.7331e+07	8.44575e+07	8.82354e+07	9.87412e+07	7.81281e+07	9.9719e+07	1.4253e+08	115247829	1.37154e+08	1.49357e+08	4.20863e+07	5.41969e+07	3.01416e+07	4.12769e+07	4.18202e+07	3.25305e+07	4.95729e+07	1.09475e+08	1.0252e+08	9.96513e+07	9.27024e+07	1.08714e+08	1.00501e+08	2.26718e+08	9.45998e+07	9.88761e+07	9.92779e+07	2.20738e+08
V778	HESI(+)	730.54	8.11	6.05	M+NH4	DG(22:6_22:6)	DG 44:12	4.81479e+06	6.81735e+06	8.24464e+06	6.32315e+06	8.86594e+06	1.84895e+06	0	0	0	1.60116e+06	1.12644e+06	0	5.419e+06	7.0016e+06	3.67456e+06	1.13612e+07	4.15564e+06	2.74084e+06	975600	1.97204e+06	0	6.89606e+06	2.76761e+06	3.03673e+06	4.14172e+06	42929	0	0	1.11051e+06	0	380630	2.89702e+06	3.30067e+06	720355	2.88048e+06	0
V779	HESI(+)	730.577	9.27	7.24	M+H	PE(P-18:0_18:1)	PE O-36:2	1.77543e+07	1.36762e+07	8.86787e+06	1.02748e+07	7.15903e+06	9.01106e+06	0	0	0	0	0	0	0	802370	1.9052e+06	0	3.53595e+06	0	4.88045e+06	6.48729e+06	1.2352e+07	4.34115e+06	1.35151e+07	9.59553e+06	1.77579e+06	0	0	0	1.39013e+06	0	2.13918e+06	0	936546	1.88369e+06	0	0
V780	HESI(+)	731.608	8.11	6.04	M+H	SM(d18:1_18:0)	SM 36:1	1.20013e+08	1.22416e+08	7.41293e+07	7.6709e+07	7.88928e+07	1.56566e+08	1.02456e+08	1.48043e+08	1.47505e+08	1.29271e+08	7.22299e+07	1.22761e+08	1.7102e+08	1.99478e+08	2.15821e+08	1.98442e+08	2.57903e+08	1.67148e+08	368660872	5.16362e+08	4.34998e+08	3.91513e+08	3.05957e+08	3.48839e+08	1.04907e+08	1.68849e+08	2.52023e+08	1.95012e+08	2.78947e+08	1.02868e+08	1.94577e+08	1.56329e+08	200549901	2.66521e+08	2.16742e+08	4.41023e+08
V781	HESI(+)	732.557	7.93	5.91	M+H	PE(17:0_18:1)	PE 35:1	2.46562e+08	1.9521e+08	1.05762e+08	1.00246e+08	1.28163e+08	2.1336e+08	4.01941e+07	1.70147e+07	4.16769e+07	5.67812e+07	3.38601e+07	2.46589e+07	7.78945e+07	3.49697e+07	1.06757e+08	1.25919e+08	9.14076e+07	8.79378e+07	8.43165e+07	9.18762e+07	1.12019e+08	9.19146e+07	1.01533e+08	6.9709e+07	1.66343e+08	7.26099e+07	6.43715e+07	5.32998e+07	7.84183e+07	183696892	1.13907e+08	4.22184e+07	2.50187e+07	1.42666e+08	1.05719e+08	7.95293e+07
V782	HESI(+)	732.557	7.32	5.53	M+H	PC(16:1_16:0)	PC 32:1	22966022118	21507686625	16830416210	21916780541	13654233386	18821393603	13258403112	6867345756	11560492116	9787836125	11987497596	9765290301	7470744856	8167042398	13734084329	9481223903	11761718930	10927566946	11807697941	12504512449	13463519845	14068271293	8984412988	6407220024	21304491848	12576342628	10873458255	9020486256	10989775958	19624558828	12044810698	15063746222	11158619079	13427762087	12808288468	13596144324
V783	HESI(+)	732.558	8.15	6.07	M+H	PC(14:0_18:1)	PC 32:1	1.93085e+07	1.64196e+07	4.4327e+07	4.63321e+07	6.5726e+07	5.34975e+07	2.62166e+07	1.01489e+07	2.72701e+07	2.07659e+07	3.65443e+07	2.44316e+07	3.6331e+07	9.54827e+07	7.67443e+07	6.35886e+07	3.9534e+07	3.61176e+07	2.26192e+07	2.62767e+07	3.57837e+07	2.3234e+07	3.94781e+07	3.24349e+07	7.13844e+07	3.52163e+06	1.50666e+07	1.6745e+07	2.18894e+07	3.4647e+07	1.86867e+07	4.78388e+07	2.56558e+07	4.58068e+07	2.82668e+07	2.3982e+07
V784	HESI(+)	732.613	10.66	9.44	M+NH4	TG(12:0_15:2_15:2)	TG 42:4	1.96379e+07	2.9733e+06	1.3774e+08	142749812	4.9777e+06	8.34705e+06	2.24508e+06	4.19192e+08	7.89e+06	7.64686e+06	8.90869e+07	3.90938e+06	493344	1.11109e+08	1.48484e+06	2.71517e+06	3.81562e+07	1.57911e+06	3.8055e+06	1833154	5.17248e+06	3.56945e+06	1.02907e+07	4.10459e+06	3.53234e+06	9.73645e+06	9.27057e+06	9.79106e+06	8.04104e+06	698016	3.36265e+06	1.28004e+06	947597	3.35907e+06	1.87479e+06	0
V785	HESI(+)	734.474	5.67	4.77	M+H	PE(18:3_18:4)	PE 36:7	174541	436103	207090	481732	308782	265255	1.51897e+06	1.48468e+06	2.92072e+06	2.42448e+06	1.83028e+06	1.6149e+06	501221	770091	312166	122634	330368	489106	100476	36876.3	307360	369726	0	27416.9	366042	590849	707954	803778	1.14277e+06	1.82765e+06	183264	18601.8	0	0	179355	229375
V786	HESI(+)	734.559	7.31	5.52	M+H	PC(16:0_16:0)	PC 32:0	2554195775	2380051552	1845179717	2395383358	1501381943	2075456814	1407542933	7.26949e+08	1146563575	1045435261	1365256252	1056408766	7.92604e+08	8.66068e+08	1335621697	1044349384	1240609675	1333103491	1382414824	1368359587	1703260735	1579126816	1165608344	6.83486e+08	2379521475	1203818821	1303518183	1030997620	1364978359	2177989327	1333358684	1490144175	1150905912	1604971116	1316639408	1412293128
V787	HESI(+)	734.569	8.43	6.31	M+H	PC(14:0_18:0)	PC 32:0	1.98498e+07	2.84568e+07	111761575	1.29673e+08	1.1939e+08	8.98051e+07	2.08535e+07	1.8395e+07	1.64306e+07	1.47769e+07	3.46187e+07	9.25666e+07	5.37846e+07	1.05042e+08	2.35181e+07	1.80553e+07	1.54967e+07	4.64055e+07	1.03905e+08	3.42878e+07	3.56718e+07	3.61914e+07	3.38872e+07	3.04659e+07	3.35334e+07	2.03106e+07	2.21606e+07	2.24285e+07	3.92239e+07	1.20837e+08	2.16454e+07	2.4017e+07	1.97748e+07	1.85222e+07	1.75699e+07	4.87941e+07
V788	HESI(+)	734.573	8.07	6.01	M+H	PC(16:0_16:0)	PC 32:0	18405866645	20497039283	21670679366	26593899903	20946566271	19673862653	25580723634	19500734128	23920623267	21122127664	21082423734	20576467051	18047007382	23098229760	22913770802	24761580419	22996976632	19554446849	20610079324	26389089892	22876380199	24101445887	23404068332	22126689187	22203678796	22732852700	22885926235	21702559447	25415499590	22303641043	24014119496	27360446911	24215882473	21114711713	23315758264	20767292512
V789	HESI(+)	734.629	11.17	10.15	M+NH4	TG(6:0_18:1_18:2)	TG 42:3	6.41232e+07	9.89588e+06	3.02368e+07	3.95849e+07	3.20166e+07	7.38093e+07	1.7725e+07	1.17951e+07	2.04881e+07	2.63223e+07	4.56889e+07	3.28389e+07	1.20111e+07	1.30007e+07	1.22259e+07	1.6429e+07	3.14765e+07	1.61747e+07	2.55859e+07	1.8915e+07	3.7148e+07	3.13834e+07	3.4788e+07	1.89252e+07	1.00948e+07	7.54576e+07	3.61863e+07	8.04463e+07	6.53246e+07	2.19937e+07	2.87018e+07	2.07632e+07	1.99397e+07	3.42823e+07	2.21274e+07	8.89328e+06
V790	HESI(+)	736.492	6.09	4.95	M+H	PE(20:5_16:1)	PE 36:6	1.71602e+08	1.55729e+08	6.40639e+07	7.12302e+07	1.07716e+08	1.70462e+08	3.57177e+07	1.44967e+07	2.7118e+07	2.36226e+07	1.64815e+07	1.8456e+07	7.35907e+06	5.95409e+06	9.38673e+06	6.09367e+06	5.53431e+06	4.42641e+06	1.01984e+08	6.62972e+07	2.04984e+08	180339797	7.7627e+07	3.68414e+07	2.49559e+07	2.18687e+07	2.58312e+07	1.56589e+07	3.54313e+07	3.67515e+07	4.72406e+06	2.64887e+06	5.08671e+06	8.50643e+06	6.65489e+06	2.48767e+06
V791	HESI(+)	736.576	5.42	4.65	M+NH4	DG(22:3_22:6)	DG 44:9	5866.79	2381.74	217453	0	90107.2	48277.3	210031	0	112896	25973.4	0	53564.1	0	2578.66	0	0	0	0	50887.3	716100	18582.5	0	120346	70414.1	0	208491	277422	11808.8	258570	0	0	0	0	0	0	0
V792	HESI(+)	736.588	9.38	7.39	M+NH4	DG(22:3_22:6)	DG 44:9	2487.41	1801.89	1.01502e+07	1.33471e+07	519863	2252.45	3.56629e+07	3.82507e+07	3.12662e+07	5.26046e+07	86571628	3.80495e+07	1.19892e+08	1.14482e+08	1.09186e+08	1.54186e+08	6.9877e+07	1.19934e+08	108384	3.11567e+06	143788	71318.6	1.97898e+06	1.76365e+06	4.35836e+07	1.62958e+07	4.45524e+06	2.91078e+07	8.15323e+06	1.59012e+07	1.11328e+08	1.45501e+08	105035250	1.04538e+08	1.28363e+08	1.43311e+08
V793	HESI(+)	736.645	11.64	10.7	M+NH4	TG(8:0_16:1_18:1)	TG 42:2	4.73902e+07	1.10413e+07	5.30578e+07	6.13169e+07	3.82748e+07	216720737	1.67245e+07	1.02087e+07	1.65679e+07	2.62319e+07	4.68578e+07	5.24647e+07	3.72638e+07	2.79276e+07	5.63211e+07	6.35045e+07	1.10378e+08	6.04015e+07	2.48218e+07	2.88829e+07	4.91818e+07	4.49616e+07	4.56876e+07	1.53565e+07	1.44932e+07	9.5291e+07	4.20208e+07	1.15053e+08	8.53518e+07	7.21112e+07	82810710	6.40943e+07	6.67786e+07	132076111	7.87868e+07	4.95039e+07
V794	HESI(+)	737.571	10.67	9.45	M+Na	TG(12:0_15:2_15:2)	TG 42:4	5.02276e+06	2.23208e+06	5.85536e+07	6.08997e+07	2.88554e+06	2.64909e+06	2.14659e+06	1.83515e+08	3.33709e+06	3.89012e+06	2.97266e+07	2.54662e+06	5.10977e+06	5.71961e+07	4.51294e+06	3.29886e+06	1.32984e+07	5.3825e+06	3.06336e+06	999890	2.28527e+06	1.31495e+06	3.59249e+06	1.11291e+06	1.65005e+06	1.9104e+06	3.07684e+06	3.92428e+06	2.41369e+06	7.2736e+06	1.10273e+06	1.9036e+06	3.6559e+06	2.20131e+06	2.03306e+06	1.80792e+06
V795	HESI(+)	738.506	6.36	5.07	M+H	PC(15:2_18:3)	PC 33:5	1.12293e+08	8.88404e+07	3.31461e+07	3.6772e+07	7.75194e+07	1.18476e+08	1.46192e+07	2.49966e+07	1.95645e+07	2.66934e+07	1.75495e+07	1.54051e+07	2.83604e+06	6.59938e+06	2.11119e+06	6.90543e+06	1.49914e+06	3.06978e+06	4.30292e+07	4.17421e+07	7.12888e+07	7.72729e+07	5.03094e+07	5.29168e+07	1.33098e+07	8.39472e+06	1.83838e+07	4.16028e+06	5.05957e+06	4.50068e+06	1736872	7.34685e+06	1.31486e+07	7.57535e+06	550468	139394
V796	HESI(+)	738.507	6.86	5.29	M+H	PE(16:1_20:4)	PE 36:5	3.42713e+08	5.42346e+08	5.66585e+08	657311955	5.26208e+08	2.04786e+08	4.42011e+08	2.06049e+08	3.02086e+08	2.93363e+08	4.30431e+08	2.19475e+08	1.62273e+08	2.27459e+08	2.38113e+08	2.23997e+08	1.64052e+08	2.9019e+08	1.84984e+08	279562003	5.61242e+08	3.43421e+08	2.24792e+08	1.86642e+08	5.00974e+08	1.96787e+08	203346630	1.30524e+08	3.53208e+08	599571840	1.82489e+08	1.42985e+08	1.84851e+08	2.54525e+08	2.76905e+08	2.94767e+08
V797	HESI(+)	738.507	6.97	5.34	M+NH4	BMP(18:2_18:4)	BMP 36:6	2033034176	1308038204	3.2592e+08	3.84122e+08	7.47322e+08	1337118258	314103240	2.93367e+08	2.37479e+08	2.61394e+08	144045372	126176749	1.45896e+08	1.93032e+08	288859878	1.76988e+08	3.0755e+08	7.18042e+07	1024448631	1398935092	1390047274	1852887351	6.42198e+08	4.49199e+08	3.33998e+08	3.30827e+08	5.65209e+08	2.12295e+08	3.33028e+08	1.40447e+08	2.24494e+08	1.53832e+08	1.91289e+08	2.45496e+08	2.36315e+08	3.99875e+07
V798	HESI(+)	738.544	6.56	5.16	M+H	PC(O-16:2_18:3)	PC O-34:5	3.77058e+07	3.89921e+07	3.99247e+07	4.29077e+07	2.58947e+07	4.06448e+07	3.12756e+07	2.70756e+07	3.30619e+07	2.51917e+07	1.77764e+07	5.34358e+07	3.15532e+07	1.88268e+07	2.69151e+07	2.12669e+07	1.5499e+07	2.82854e+07	4.56416e+07	5.28627e+07	3.61342e+07	5.84228e+07	3.07241e+07	2.19951e+07	5.36802e+07	7.54335e+07	7.01841e+07	1.44774e+08	7.76933e+07	1.00672e+08	2.87695e+07	2.98268e+07	2.37769e+07	3.56076e+07	1.83909e+07	2.08287e+07
V799	HESI(+)	738.544	6.39	5.08	M+H	PC(P-18:4_16:0)	PC O-34:5	2.12249e+07	3.17477e+07	1.32482e+07	4.56865e+06	1.97785e+07	1.63408e+07	8.81416e+06	1.20037e+07	3.75351e+06	3.69536e+06	3.64924e+06	3.67042e+07	1.34939e+07	2.16899e+06	1.52358e+06	1.90127e+06	2.02072e+06	1.53877e+07	2.34383e+07	2.3327e+07	9.245e+06	8.93782e+06	2.38269e+07	1.53963e+07	2.42302e+07	2.54718e+07	2.41424e+07	4.52863e+07	3.09164e+07	3.32479e+07	8.30788e+06	7.66797e+06	5.86242e+06	1.21459e+07	6.02775e+06	4.63496e+06
V800	HESI(+)	738.601	9.48	7.54	M+NH4	DG(22:4_22:4)	DG 44:8	2.03855e+06	1.19002e+06	6.4022e+06	1.00795e+07	6.83993e+06	2470599	6.0074e+06	3.76521e+06	5.47987e+06	9.21056e+06	2.66219e+07	1.2103e+07	4.03063e+07	1.46974e+07	1.97874e+07	3.35709e+07	1.58784e+07	1.90829e+07	1.68089e+06	2.82987e+06	501915	0	4.58256e+06	5.00909e+06	8.03221e+06	6.60452e+06	3.58322e+06	6.50666e+06	4.65838e+06	249942	3.34444e+07	1.04346e+07	4.52403e+07	6.01025e+07	2.11259e+07	2.62689e+06
V801	HESI(+)	738.602	9.62	7.75	M+NH4	DG(22:4_22:4)	DG 44:8	3.48152e+06	5.01397e+06	7.73802e+06	1.07186e+07	9.88054e+06	1.1674e+06	3.69711e+07	5.88034e+07	4.19082e+07	5.479e+07	6.21973e+07	3.93141e+07	8.83992e+07	9.43501e+07	9.90549e+07	1.19036e+08	7.15887e+07	5.70048e+07	7.66423e+06	7.97604e+06	3.39794e+06	2.32871e+06	5.98623e+06	1.11921e+07	2.77813e+07	4.85859e+07	3.25171e+07	2.72746e+07	2.19535e+07	1.4794e+07	5.401e+07	1.18076e+08	6.22255e+07	7.37987e+07	3.90538e+07	3.64256e+07
V802	HESI(+)	738.658	10.83	9.68	M+NH4	TG(10:0_14:0_18:1)	TG 42:1	7.27628e+06	1.27098e+07	1.74913e+07	1.65484e+07	1.76834e+07	1.2886e+07	2.35502e+07	4.35931e+07	2.97039e+07	2.79022e+07	2.42668e+07	4.98066e+07	2.9963e+06	5.93543e+06	5.29111e+06	5.84264e+06	8.28274e+06	2.92672e+06	4.08272e+07	4.52298e+07	2.84753e+07	3.83888e+07	2.65359e+07	1.89834e+07	1.16382e+07	3.38789e+07	4.31092e+07	3.22551e+07	4.65023e+07	5.45376e+07	2.03997e+06	4.81547e+06	0	7.4806e+06	2.92132e+06	0
V803	HESI(+)	738.663	12.09	11.14	M+NH4	TG(8:0_16:0_18:1)	TG 42:1	4.40744e+07	2.08841e+07	5.61969e+07	7.80854e+07	3.08458e+07	1.33622e+08	1.88284e+07	1.15862e+07	1.75476e+07	2.29001e+07	3.5099e+07	5.1158e+07	4.74331e+07	3.49062e+07	6.06071e+07	6.58772e+07	1.35972e+08	6.91789e+07	2.56278e+07	3.11101e+07	4.03212e+07	4.79722e+07	2.63592e+07	1.22199e+07	1.63053e+07	5.58114e+07	2.62591e+07	6.88137e+07	5.55743e+07	7.98127e+07	7.74916e+07	6.20831e+07	6.43055e+07	1.94242e+08	9.42513e+07	5.66322e+07
V804	HESI(+)	740.523	6.36	5.07	M+H	PC(17:4_16:0)	PC 33:4	5.29859e+06	4.54287e+06	676706	23870.4	4.34234e+06	1.32934e+07	1.25963e+06	1.66219e+06	2.27256e+06	15011.5	0	108938	460112	454289	2.51653e+06	1.28627e+06	401097	0	3.02493e+06	3.4149e+06	2.35999e+06	5.93547e+06	5.52581e+06	4.78942e+06	1.9078e+06	2.46391e+06	1.99741e+06	187722	556109	99360.8	1.66303e+06	1.68632e+06	1.03896e+06	923759	228146	143164
V805	HESI(+)	740.524	7.12	5.42	M+H	PE(18:2_18:2)	PE 36:4	1.2866e+08	1.45809e+08	9.47768e+07	5.54514e+07	1.31158e+08	1.08425e+08	6.49412e+07	8.02403e+07	6.3106e+07	5.42314e+07	3.36905e+07	3.01716e+07	1.03314e+07	2.62044e+07	8.69738e+06	6.48422e+06	1.21107e+06	1.62124e+06	5.04448e+07	1.27797e+08	9.15786e+07	8.90553e+07	8.58591e+07	9.94337e+07	2.99274e+07	4.9666e+07	3.89556e+07	1.24912e+07	2.67219e+07	1.19391e+07	9.76941e+06	7.79237e+06	6.75998e+06	7.25996e+06	1.70622e+06	0
V806	HESI(+)	740.524	7.7	5.76	M+H	PE(20:4_16:0)	PE 36:4	4083735187	3213989382	1989095688	2579653160	2191624518	2246525575	1997109320	1687080455	1679148875	1980689286	1706402426	1322353955	2031800057	1949022785	2226022931	2237082764	2406515735	1751752797	2221682261	2458826759	2030418099	2412082281	2021141420	1815547855	3813462522	2070434543	2003700230	1209968150	1997409291	1785580957	2556949897	2405680087	2679782160	2589339602	2431073655	2053364620
V807	HESI(+)	740.528	6.8	5.27	M+H	PC(15:1_18:3)	PC 33:4	9.77073e+06	6.06725e+06	1.02282e+07	9.5302e+06	8.67767e+06	5.34525e+06	3.30444e+06	1.29069e+06	2.552e+06	1.11866e+07	1.21595e+06	1.09293e+06	2.28724e+06	9.64156e+06	1.76143e+07	4.05362e+06	5.31305e+06	3.05565e+06	8.50231e+06	1.26506e+07	5.82332e+06	4.87605e+06	1.93233e+06	1.30536e+07	2.69579e+07	2.55754e+06	2.74816e+06	1.33289e+07	1.64729e+07	6.76265e+06	2.74401e+07	2.05522e+07	2.62038e+07	2.96825e+07	3.68894e+07	3.21791e+07
V808	HESI(+)	740.548	5.67	4.77	M+NH4	PG(16:0_16:0)	PG 32:0	2.3664e+06	3.48777e+06	988604	1.1392e+06	683524	1.28792e+06	778127	888789	1.40865e+06	2.69411e+06	1.59506e+06	836261	1.38408e+06	3.71426e+06	7.91937e+06	6.00558e+06	4.61796e+06	1.77577e+06	1.22587e+07	5.2811e+06	7.76835e+06	1.20053e+07	3.81844e+06	5.75036e+06	6.12193e+06	4.12284e+06	6.7795e+06	1.41449e+07	5.0149e+06	5.86538e+06	1.18663e+07	1.41338e+07	2.25039e+07	1.77476e+07	1.40804e+07	1.4398e+07
V809	HESI(+)	740.562	7.07	5.39	M+H	PC(O-16:2_18:2)	PC O-34:4	8.53242e+07	7.61592e+07	101301851	1.00964e+08	1.80639e+07	6.60219e+07	7.23383e+07	9.12084e+07	8.99911e+07	9.16827e+07	7.69415e+07	4.11626e+07	4.01707e+07	6.21303e+07	8.96095e+07	7.79355e+07	9.84204e+07	3.93989e+07	7.4995e+07	8.09054e+07	5.9793e+07	6.85648e+07	7.26722e+07	7.23644e+07	3.2667e+07	6.76222e+07	4.44017e+07	7.97352e+07	5.90803e+07	5.94391e+07	3.25005e+07	4.83238e+07	3.23126e+07	4.77173e+07	4.69864e+07	3.28276e+07
V810	HESI(+)	740.613	11.13	10.1	M+NH4	DG(22:1_22:6)	DG 44:7	9.00109e+06	1.22431e+07	3.38435e+06	4.6089e+06	8.75031e+06	6.32027e+06	20419.9	739868	1.70937e+06	663755	744985	3.03831e+06	3.03832e+06	2.10972e+06	2.15871e+06	1.77324e+06	1.07255e+06	2.37567e+06	2.5926e+06	2.50559e+06	1.45144e+06	2.22983e+06	1.64083e+06	4.79292e+06	2.30993e+06	624893	11778.6	2.07358e+06	433985	438991	1.86882e+06	766620	1.52524e+06	3.02889e+06	2.16164e+06	272408
V811	HESI(+)	740.618	10.43	9.08	M+NH4	TG(O-17:1_5:0_22:6)	TG O-44:7	2.24956e+07	1.56489e+07	8.66047e+06	6.16382e+06	5.33271e+07	3.14307e+07	1.89868e+07	5.82903e+06	4.30568e+06	5.95138e+06	3.44512e+07	6.5733e+06	8.66308e+06	1.10174e+07	9.92647e+06	6.94806e+06	5.34929e+06	5.56233e+06	1.87714e+06	2.8887e+06	4.38206e+06	868436	4.39151e+06	2.15458e+06	7.47983e+07	3.04358e+06	7.43888e+06	2.12252e+06	5.52137e+06	1.00085e+06	7.25355e+06	1.37173e+07	5.98949e+06	5.71299e+06	9.28798e+06	4.97774e+06
V812	HESI(+)	740.618	10.17	8.64	M+NH4	DG(18:1_26:6)	DG 44:7	0	3824.94	30254.7	43343.4	829576	14171.7	5.49789e+06	3.45978e+06	5.20973e+06	6.54076e+06	2.25691e+07	6.75215e+06	5.74775e+07	2.81136e+07	5.10947e+07	4.7945e+07	3.01451e+07	4.08915e+07	27928.2	56715	388349	57446.1	213900	12369.2	5.40964e+06	2.23598e+06	346663	3.18659e+06	1.39961e+06	211020	6.28516e+07	8.63253e+07	4.07958e+07	6.3289e+07	5.46989e+07	2.23805e+07
V813	HESI(+)	741.47	5.25	4.56	M+Na	PG(16:0_16:2)	PG 32:2	0	31297.8	2.36831e+06	655687	866989	888304	0	0	320489	1.34288e+06	920080	596465	444544	0	348117	314196	403411	651744	424576	0	63859.3	203316	460717	236756	0	0	0	491146	580812	1.11239e+06	0	6222	64525.7	403104	793178	433331
V814	HESI(+)	741.543	9.38	7.39	M+H	TG(P-13:4_14:4_19:3)	TG O-46:12	0	0	1.12092e+06	2.01302e+06	0	0	1.5936e+07	2.24833e+07	1.95574e+07	2.90554e+07	4.34385e+07	2.66103e+07	7.47123e+07	6.29856e+07	6.54268e+07	106889039	4.73212e+07	7.63032e+07	0	0	1588.39	39770.2	489955	1622.96	1.75262e+07	1.12794e+07	5.59166e+06	1.79697e+07	5.36408e+06	1.44151e+07	5.73685e+07	7.06424e+07	4.9446e+07	6.41731e+07	8.79875e+07	8.93138e+07
V815	HESI(+)	741.546	2.84	2.7	M+H	SM(t18:1_18:3)	phSM 36:4	15735.9	0	0	350290	106773	31197.4	0	479112	0	5669	1.38368e+06	11174.1	75943.7	1.44082e+06	0	970593	0	0	566291	4.00301e+06	447088	0	377905	209142	592284	122435	128585	100990	355393	0	0	2.12819e+06	109405	7.90357e+06	222332	198674
V816	HESI(+)	741.6	11.64	10.7	M+H	TG(10:0_14:1_20:4)	TG 44:5	2.09323e+07	5.35042e+06	28340425	3.28094e+07	2.32275e+07	1.24237e+08	8.84488e+06	3.68414e+06	8.1691e+06	1.41666e+07	2.47486e+07	2.34943e+07	1.90871e+07	1.10451e+07	2.6284e+07	3.27576e+07	5.699e+07	3.37873e+07	1.30154e+07	1.34959e+07	2.20578e+07	2.03037e+07	1.74952e+07	8.06896e+06	8.28666e+06	3.70158e+07	1.36935e+07	4.51594e+07	2.78177e+07	2.79596e+07	4.66792e+07	3.51093e+07	3.42324e+07	6.67771e+07	4.67336e+07	2.85085e+07
V817	HESI(+)	741.6	11.68	10.74	M+Na	TG(8:0_16:1_18:1)	TG 42:2	2.08314e+07	1.27592e+06	2.80614e+07	3.18756e+07	2.31367e+07	1.23018e+08	8.75811e+06	3.648e+06	8.08897e+06	1.40276e+07	2.50333e+07	2.3264e+07	1.92083e+07	1.11098e+07	2.58635e+07	3.15308e+07	5.6431e+07	3.33556e+07	1.29573e+07	1.33513e+07	2.19073e+07	4.94336e+06	1.73236e+07	8.17225e+06	8.20537e+06	3.66474e+07	1.35591e+07	4.5553e+07	2.75447e+07	2.76903e+07	4.69833e+07	3.46439e+07	3.45843e+07	6.6122e+07	4.77681e+07	2.86376e+07
V818	HESI(+)	742.501	3.59	3.42	M+H	PC(15:0_18:3)	PC 33:3	3.40517e+06	3.59256e+06	2.33865e+06	1.40741e+06	2.05876e+06	1.64933e+06	1.0273e+07	1.2916e+07	7.70284e+06	9.71897e+06	3.02981e+06	3.97225e+06	4.85064e+06	9.32776e+06	4.49531e+06	4.8721e+06	4.26919e+06	9.19678e+06	6.25212e+06	4.37439e+06	8.75041e+06	7.69399e+06	6.73745e+06	6.30063e+06	3.55582e+06	6.03891e+06	7.19731e+06	1.04204e+07	7.75037e+06	6.20698e+06	8.14311e+06	5.57615e+06	6.36727e+06	6.75038e+06	5.69302e+06	5.73017e+06
V819	HESI(+)	742.535	8.03	5.99	M+H	PE(18:0_18:3)	PE 36:3	1.65652e+08	1.41823e+08	8.71017e+07	9.61681e+07	1.31597e+08	145089308	6.48792e+07	3.38912e+07	5.74055e+07	5.39751e+07	4.71871e+07	5.11914e+07	4.32261e+07	47759450	6.48043e+07	4.67067e+07	7.50802e+07	4.61193e+07	9.13913e+07	8.32024e+07	9.96688e+07	8.73336e+07	6.05092e+07	7.25369e+07	1.07708e+08	4.91108e+07	6.72937e+07	3.50693e+07	4.83536e+07	3.22826e+07	5.04082e+07	4.06446e+07	5.2747e+07	8.23044e+07	6.50977e+07	4.84168e+07
V820	HESI(+)	742.539	7.07	5.4	M+H	PC(17:3_16:0)	PC 33:3	1.48335e+07	1.05391e+07	1.31795e+06	4.62232e+06	1.11862e+07	4.97896e+06	7.08775e+06	1.04115e+07	7.35765e+06	3.78372e+06	3.28755e+06	1.2496e+06	108058	3.84832e+06	5.46938e+06	2.75721e+06	1.65372e+06	722484	5.78492e+06	1.2208e+07	6.41254e+06	1.06251e+07	4.36976e+06	1.81337e+06	8.98155e+06	1.33708e+07	5.36346e+06	13681.8	4.64565e+06	6.91633e+06	1.09538e+07	1.04785e+07	4.25371e+06	1.56334e+06	8.06078e+06	18753
V821	HESI(+)	742.539	6.46	5.11	M+H	PC(18:3_15:0)	PC 33:3	9.09547e+07	9.4532e+07	6.69722e+06	1.03518e+07	7.44372e+06	8.25901e+06	3.90211e+06	2.27046e+07	3.35583e+06	3.77665e+06	3.20738e+06	1.98695e+06	956207	9.33491e+06	1.03014e+06	777647	1.35602e+06	854523	7.84811e+06	2.28986e+07	2.9925e+07	4.2771e+07	1.11277e+07	5.61493e+06	6.93105e+06	1.87339e+07	4.12676e+06	1.69193e+07	3.21486e+06	6.72528e+06	1.91838e+06	7.4424e+06	3.58351e+06	2.84177e+06	957160	896043
V822	HESI(+)	742.539	6.32	5.05	M+H	PE(16:1_20:2)	PE 36:3	5.28357e+07	1.61712e+07	2.37612e+07	2.82873e+07	3.26498e+07	3.12189e+07	1.77622e+07	5.9059e+06	7.80374e+06	1.93288e+07	2.23308e+07	2.04454e+07	5.1698e+06	3.79875e+06	1.01174e+07	1.60147e+07	3.31377e+06	2.32151e+07	5.5521e+07	1.62317e+07	1.11875e+07	2.30291e+07	9.99567e+07	6.38966e+07	1.10816e+07	1.13596e+07	8.99261e+06	5.65064e+07	6.97756e+07	2.6215e+07	1.42256e+06	659399	1.35585e+06	1.56819e+07	1.52692e+07	7.54183e+06
V823	HESI(+)	742.539	7.94	5.91	M+H	PE(18:1_18:2)	PE 36:3	1487313241	1397252049	8.29369e+08	8.20683e+08	1212092090	1175389619	6.85242e+08	622872915	6.20802e+08	6.12024e+08	4.97345e+08	407545502	3.51543e+08	7.94789e+08	4.80176e+08	382187400	4.72967e+08	300672951	7.15489e+08	1116010673	9.70525e+08	1218500599	8.49223e+08	952461827	7.26947e+08	5.71542e+08	7.12491e+08	3.2468e+08	6.23177e+08	3.10874e+08	5.00181e+08	3.18706e+08	4.44537e+08	5.6267e+08	4.67584e+08	2.32418e+08
V824	HESI(+)	742.573	8.7	6.57	M+H	PC(O-16:1_18:2)	PC O-34:3	7.40076e+06	3.25778e+07	8.13115e+07	9.49855e+07	5.22819e+07	5.05942e+07	4.57542e+07	2.83095e+07	1.45948e+07	4.41305e+07	3.80021e+07	4.50266e+07	2.28335e+07	3.73957e+07	4.30405e+07	5.44891e+07	5.53849e+07	2.77355e+07	5.15085e+07	6.39573e+07	6.00472e+07	8.48929e+07	5.50417e+07	6.89909e+07	6.03439e+06	3.50897e+07	4.37778e+07	5.03016e+07	5.68325e+07	5.61198e+07	5.47864e+06	3.49124e+07	4.24257e+07	1.02331e+07	4.17123e+07	2.27126e+07
V825	HESI(+)	742.577	7.31	5.52	M+H	PC(P-16:1_18:1)	PC O-34:3	8.6422e+06	1.11685e+07	1.23598e+07	1.48232e+07	9.61318e+06	9.17708e+06	0	0	6.62401e+06	0	0	1.8638e+06	2.43415e+06	5.1233e+06	1.01975e+07	7.66154e+06	9.72398e+06	865574	7.79985e+06	5.35392e+06	2.27638e+06	1.28858e+07	7.28406e+06	4.37719e+06	2.3112e+06	4.3305e+06	2.66328e+06	3.67552e+06	3.50273e+06	2.20242e+06	2.69653e+06	30841.8	0	4.2566e+06	0	0
V826	HESI(+)	742.601	10.4	9.02	M+NH4	TG(5:0_16:0_22:6)	TG 43:6	6.79956e+06	4.99759e+06	2.87898e+07	3.63903e+07	1.31082e+07	1.59174e+07	1.70094e+07	1.08866e+07	2.61471e+07	2.41415e+07	3.73695e+07	5.8262e+07	2.86878e+07	8.1059e+06	1.48445e+07	1.99186e+07	8.90239e+06	3.76747e+07	2.11621e+07	2.66621e+07	3.96221e+07	4.03176e+07	6.61258e+07	1.8627e+07	1.40874e+07	5.73018e+07	3.74907e+07	9.02371e+07	5.32063e+07	3.4441e+07	2.22822e+07	1.09805e+07	1.67723e+07	2.26502e+07	8.99267e+06	1.17459e+07
V827	HESI(+)	742.626	10.06	8.46	M+NH4	DG(20:1_24:5)	DG 44:6	0	0	1.71424e+06	1.23231e+06	0	0	771875	605001	0	1.39795e+06	1.9433e+06	2.79999e+06	1.3062e+07	836510	4.75693e+06	1.00737e+07	941479	6.68144e+06	0	430385	0	0	0	0	712387	2.83545e+06	18532.2	1.16177e+06	0	0	1.21931e+07	7.6034e+06	1.52039e+07	1.65509e+07	3.42206e+06	3.12052e+06
V828	HESI(+)	742.635	10.52	9.21	M+NH4	DG(18:1_26:5)	DG 44:6	1.36668e+06	2.25557e+06	1.60164e+07	1.95552e+07	4.23596e+06	1.46415e+06	2.78747e+07	2.26886e+07	2.61069e+07	2.91743e+07	6.56626e+07	3.17075e+07	5.76817e+07	3.16419e+07	4.12671e+07	6.75822e+07	2.59973e+07	5.31192e+07	4.09373e+06	7.34364e+06	3.05463e+06	1.5618e+06	5.67089e+06	4.8257e+06	2.20652e+07	3.12951e+07	1.22908e+07	1.58677e+07	1.12709e+07	8.43146e+06	1.33317e+08	6.75111e+07	8.26929e+07	144722425	4.0796e+07	3.38793e+07
V829	HESI(+)	742.635	11.1	10.05	M+NH4	DG(18:1_26:5)	DG 44:6	1.61068e+07	1.00467e+07	2.46839e+06	945472	1.59572e+07	1.89708e+07	1.31118e+06	1.40027e+06	241748	907954	2.49947e+06	215230	451922	52284.9	595885	731762	228750	95114	0	1199.19	0	100754	0	0	2.05499e+07	0	0	0	2766.63	305494	470920	0	156957	318810	103783	281826
V830	HESI(+)	742.636	10.63	9.39	M+NH4	TG(O-15:1_5:0_24:5)	TG O-44:6	7.91591e+06	9.35479e+06	2.98138e+06	2.93731e+06	8.74125e+06	4.63818e+06	5.88704e+06	3.29883e+06	4.46675e+06	4.55836e+06	1.3249e+07	8.57798e+06	2.25684e+07	1.06231e+07	2.22638e+07	2.85042e+07	1.42157e+07	2.85592e+07	806054	853558	589437	42200.8	885311	499647	6.42672e+06	4.55603e+06	2.15006e+06	2.9107e+06	1.37579e+06	1.96277e+06	3.55164e+07	3.6803e+07	1.66527e+07	2.40023e+07	2.92364e+07	7.92512e+06
V831	HESI(+)	743.562	2.82	2.69	M+H	SM(t18:1_18:2)	phSM 36:3	0	0	723489	876286	2.14726e+06	8132.51	0	0	1.7424e+06	9.77124e+06	1.45647e+07	608892	5.06013e+06	5.78979e+06	4.18052e+06	6.84006e+06	6.12262e+06	6.73912e+06	1.74107e+06	211672	157667	54226.2	0	1.31428e+06	816861	100165	43134.8	941.571	0	0	1.53187e+06	6.17056e+06	2.44805e+06	5.06746e+06	4.07763e+06	1.01104e+07
V832	HESI(+)	743.615	12.08	11.14	M+Na	TG(8:0_16:0_18:1)	TG 42:1	1.28241e+07	4.28925e+06	2.61895e+07	2.29791e+07	9.07358e+06	5.05346e+07	5.0443e+06	2.61365e+06	5.5301e+06	6.4958e+06	1.29335e+07	1.92858e+07	1.46208e+07	7.69695e+06	1.42984e+07	1.98502e+07	6.39185e+07	2.35292e+07	7.5342e+06	6.32708e+06	7.88271e+06	8.84521e+06	3.37015e+06	1.15563e+06	9.23825e+06	1.83438e+07	5.93669e+06	2.49529e+07	1.65372e+07	2.85837e+07	3.59486e+07	2.44048e+07	2.66531e+07	7.47948e+07	4.77304e+07	3.40974e+07
V833	HESI(+)	744.552	7.28	5.5	M+H	PC(16:1_17:1)	PC 33:2	9.03408e+07	8.50911e+07	5.18653e+07	3.6183e+07	4.61164e+07	4.33483e+07	2.9789e+07	3.65548e+07	6.32222e+07	2.39605e+07	2.24433e+07	2.89426e+07	1.94812e+06	1.60471e+07	7.19379e+07	2.55129e+07	1.7943e+07	1.51362e+07	8.99324e+06	3.11434e+07	2.52221e+07	3.89507e+07	3.29311e+07	3.43717e+07	4.34042e+07	5.94796e+07	3.33144e+07	1.25288e+07	5.01284e+07	4.59599e+07	4.02593e+07	3.89474e+07	4.56093e+07	4.33154e+07	3.19077e+07	1.66621e+06
V834	HESI(+)	744.553	7.02	5.37	M+H	PC(17:2_16:0)	PC 33:2	4543050158	4104474677	3020008845	3459915598	4586818181	3494049078	1962403622	1795590551	1541905683	1919820973	1959036298	1671270364	1052341911	1674623412	889410844	9.75708e+08	8.22632e+08	1238715538	1865831879	1881124166	2074858396	3131038908	2991518218	2748861964	2478419884	1722591840	2073978263	1683389673	1877002504	2256633154	8.05215e+08	6.97193e+08	8.51299e+08	949705309	6.46429e+08	6.10735e+08
V835	HESI(+)	744.554	8.69	6.57	M+H	PE(16:1_20:1)	PE 36:2	1225774529	1069803225	6.20186e+08	6.26641e+08	7.359e+08	8.79475e+08	4.07716e+08	3.89926e+08	3.9574e+08	3.39921e+08	2.8881e+08	3.01459e+08	4.01355e+08	8.38905e+08	6.18508e+08	4.97144e+08	6.20202e+08	3.67894e+08	584246706	9.20616e+08	7.69314e+08	7.13002e+08	6.75579e+08	6.6454e+08	6.55953e+08	4.89093e+08	6.84232e+08	2.65996e+08	3.69867e+08	230700843	7.19999e+08	4.53989e+08	5.67587e+08	6.85326e+08	5.42702e+08	2.07648e+08
V836	HESI(+)	744.555	7.67	5.73	M+H	PC(15:1_18:1)	PC 33:2	103752730	7.04012e+07	1.60542e+07	1.63249e+07	4.9662e+07	7.41575e+07	4.18683e+06	0	0	3.71825e+06	1.8254e+06	0	4.14976e+06	2.08719e+07	2.32939e+06	4.20885e+06	6.88569e+06	0	2.05048e+07	4.57364e+07	2.12677e+07	4.36984e+07	3.45236e+07	2.5309e+07	2.87862e+07	43534.9	2.05292e+07	9.46109e+06	0	0	5.91685e+06	1.57523e+06	5.27876e+06	4.85575e+06	2.06082e+06	2.40036e+06
V837	HESI(+)	744.592	8.8	6.68	M+H	PC(O-16:1_18:1)	PC O-34:2	1.12917e+08	9.19408e+07	1.10538e+08	1.14759e+08	8.64694e+07	84080121	1.08001e+08	1.11172e+08	9.11125e+07	8.71798e+07	9.25402e+07	7.07759e+07	6.14941e+07	8.63127e+07	7.9382e+07	7.39284e+07	7.11752e+07	4.99213e+07	8.40715e+07	111131890	1.01369e+08	103157417	9.12741e+07	1.00934e+08	1.00864e+08	1.10928e+08	1.07601e+08	6.5655e+07	9.57182e+07	1.74832e+08	4.23759e+07	6.95826e+07	5.35829e+07	5.40003e+07	2.87081e+07	1.83506e+07
V838	HESI(+)	744.592	10.71	9.51	M+NH4	Co(Q8)	Co 8:0	3811255925	4009428326	3327283650	4457043413	6084404008	3582822839	2921371906	2450363586	2537992266	2292473855	2239015597	1958573227	1.91384e+08	2.43478e+08	1.61033e+08	1.57069e+08	8.04743e+07	1.383e+08	3813527651	5588075070	6068415221	5295699381	5968314929	4921602521	1995086840	2220628623	2511952519	3838072983	4074514695	3145380327	1.89738e+08	1.67815e+08	1.99519e+08	2.75126e+08	1.00998e+08	4.98551e+08
V839	HESI(+)	744.592	8.12	6.05	M+H	PC(P-16:0_18:1)	PC O-34:2	7.97385e+08	6.96144e+08	6.834e+08	8.02377e+08	5.34771e+08	5.44638e+08	4.01624e+08	3.83852e+08	4.79262e+08	313829369	307562627	3.47444e+08	2.71149e+08	4.68663e+08	5.22235e+08	4.93433e+08	5.2051e+08	2.78341e+08	3.6844e+08	588993599	4.13779e+08	4.81379e+08	5.1989e+08	5.20417e+08	3.19832e+08	5.3014e+08	3.94508e+08	3.33755e+08	3.01577e+08	4.33642e+08	3.21856e+08	4.42857e+08	3.2144e+08	3.33279e+08	1.9957e+08	1.09049e+08
V840	HESI(+)	744.626	9.73	7.92	M+NH4	DG(20:1_24:4)	DG 44:5	9.65836e+07	9.58061e+07	6.8522e+07	7.54915e+07	1.9734e+08	8.41381e+07	9.98512e+06	5.23162e+06	7.90415e+06	5.34332e+06	7.81809e+06	9.17056e+06	1.8587e+06	0	2.14612e+06	582621	4.05993e+06	2.9119e+06	2.5823e+07	3.42555e+07	2.35468e+07	2.46604e+07	2.86678e+07	1.23607e+07	1.55753e+07	3.3621e+06	5.1858e+06	7.65372e+06	8.53471e+06	6.23038e+06	1.26396e+06	0	2.21625e+06	4.746e+06	2.72957e+06	618817
V841	HESI(+)	744.65	10.97	9.88	M+NH4	DG(20:1_24:4)	DG 44:5	35514	37848.7	220193	1.80001e+06	149690	0	1.19634e+06	1.24966e+06	1.27836e+06	2.52035e+06	5.35623e+06	2.59183e+06	1.09364e+07	8.03887e+06	6.02332e+06	1.27046e+07	3.14008e+06	1.31137e+07	0	0	0	0	0	0	1.54697e+06	2.66012e+06	662274	3.03056e+06	1.86606e+06	718148	1.67105e+07	1.50799e+07	1.588e+07	1.6033e+07	1.27448e+07	8.4813e+06
V842	HESI(+)	745.503	5.54	4.71	M+H	PG(16:1_18:2)	PG 34:3	690357	2.452e+07	1.40902e+07	4.48433e+07	1.18381e+07	8.54053e+06	2.35985e+06	5.60269e+06	3.36719e+07	2.97931e+07	2.79344e+07	2.11236e+07	3.42275e+07	7.12362e+06	1.83941e+07	1.3013e+07	5.04347e+06	5.41952e+06	9.16777e+06	4.74259e+06	1.32315e+07	1.39985e+07	9.83298e+06	2.96487e+06	2.6801e+07	3.34676e+06	2.13563e+07	8.0463e+06	1.16382e+07	1.67586e+07	1.73296e+07	2.73538e+06	1.12217e+07	9.26694e+06	7.16333e+06	2.59272e+07
V843	HESI(+)	745.574	10.16	8.63	M+Na	DG(22:6_22:1)	DG 44:7	0	671542	430210	1.27977e+06	0	18570.3	4.21911e+06	1.68073e+06	4.67928e+06	4.60281e+06	1.91444e+07	5.88433e+06	4.91252e+07	2.8816e+07	4.32572e+07	4.60139e+07	3.06533e+07	3.99853e+07	581311	217717	404739	594928	515102	343173	5.46056e+06	631143	182966	2.72135e+06	84897	144046	5.28807e+07	6.24122e+07	3.18154e+07	4.46973e+07	4.87672e+07	1.23852e+07
V844	HESI(+)	745.595	8.84	6.72	M+H	SM(t18:1_18:1)	phSM 36:2	4.4009e+07	4.05435e+07	3.93965e+07	4.28512e+07	3.38408e+07	3.80446e+07	8.37025e+06	5.55732e+07	4.94371e+07	4.07352e+07	3.47475e+07	3.17715e+07	2.05555e+07	7.73309e+06	3.41672e+07	3.44033e+07	3.26219e+07	2.72631e+07	4.70334e+07	5.17372e+07	4.48185e+07	5.4488e+07	5.11427e+07	4.53066e+07	4.79806e+07	4.75117e+07	4.72886e+07	3.11602e+07	4.7323e+07	6.65503e+07	1.2664e+07	3.06751e+07	1.88899e+07	2.55915e+07	1.37707e+07	8.954e+06
V845	HESI(+)	746.571	7.81	5.83	M+H	PC(16:0_17:1)	PC 33:1	3181333015	2418521293	1920034679	2509103779	2089723422	2044494173	1165278225	1033052772	1108275282	8.46053e+08	1033330891	9.52487e+08	6.75157e+08	1131920789	9.95983e+08	8.36221e+08	6.49399e+08	9.65115e+08	1062475067	1486072246	1345698919	1609422086	1437477760	1052562691	2700747119	1457888996	1385916515	9.33953e+08	1333902849	1618267517	9.98833e+08	992861919	1065101789	1283234111	9.77896e+08	6.52944e+08
V846	HESI(+)	746.571	9.34	7.33	M+H	PE(18:0_18:1)	PE 36:1	1.52331e+08	1.28426e+08	1.41856e+08	1.98261e+08	1.47066e+08	1.10713e+08	1.1831e+08	1.00055e+08	1.64353e+08	1.38125e+08	1.56921e+08	1.4094e+08	1.94925e+08	340144159	3.71323e+08	3.09389e+08	4.86715e+08	2.39681e+08	1.55238e+08	1.85332e+08	1.38688e+08	1.6802e+08	1.47803e+08	1.57002e+08	1.89548e+08	148223410	1.23317e+08	110177657	1.21158e+08	7.65441e+07	4.30055e+08	3.56575e+08	2.95743e+08	4.79531e+08	3.2733e+08	1.45905e+08
V847	HESI(+)	746.605	8.81	6.68	M+H	PC(P-16:0_18:0)	PC O-34:1	2711921769	2790245048	4621153999	5072052205	2861670795	2227584214	4841616368	4613478738	5357497998	3464664326	4107083273	3497901659	3909722450	5659142233	6594858111	5280211417	5222097873	3443014334	3044205613	4230536409	2833933867	3400747527	3670795263	3962040402	3032098957	5761363581	4879744576	3709589082	4324680768	5535898064	4551182753	6459400921	4027528306	4502687551	3240805763	2385742381
V848	HESI(+)	747.519	5.59	4.73	M+H	PG(16:1_18:1)	PG 34:2	35715.9	1.16443e+07	1.08318e+07	1.4388e+07	5.02609e+06	1.26621e+07	611136	5.38736e+06	2.63862e+06	4.16074e+06	1.1503e+07	6.60277e+06	3.1807e+06	2.04759e+06	1.69058e+06	3.15485e+06	3.68132e+06	8.13437e+06	4.93139e+06	5.68693e+06	3.64435e+06	2.77872e+06	1.55637e+07	1.11768e+07	15301	834380	8.38544e+06	2.61653e+06	1.0367e+07	1.17489e+07	213843	35380.7	225366	327867	9.68027e+06	7.75825e+07
V849	HESI(+)	747.553	10.4	9.03	M+Na	TG(5:0_16:0_22:6)	TG 43:6	2.03245e+06	1.90949e+06	1.83563e+07	1.89665e+07	5.74707e+06	7.96447e+06	6.84015e+06	5.648e+06	1.10248e+07	1.20703e+07	1.92002e+07	3.11018e+07	1.44919e+07	3.69005e+06	9.48358e+06	8.15437e+06	4.23152e+06	2.41643e+07	1.58144e+07	9.751e+06	2.4835e+07	2.06204e+07	2.77844e+07	1.13591e+07	4.775e+06	2.13608e+07	1.27378e+07	5.06287e+07	2.31005e+07	1.83258e+07	1.13359e+07	3.81499e+06	9.79931e+06	1.16238e+07	3.7202e+06	6.75795e+06
V850	HESI(+)	747.573	7.81	5.82	M+H	SM(t18:1_18:0)	phSM 36:1	1372583229	1029442131	7.8791e+08	1037813702	8.6026e+08	8.72506e+08	5.09649e+08	4.0955e+08	4.55332e+08	3.41385e+08	4.16342e+08	4.00707e+08	2.6442e+08	5.46396e+08	4.15555e+08	3.45458e+08	2.66577e+08	4.19376e+08	477323053	6.34366e+08	5.53251e+08	6.50954e+08	5.97349e+08	4.46254e+08	1159812885	6.53885e+08	5.77723e+08	3.94653e+08	5.37651e+08	6.62964e+08	4.35152e+08	4.74866e+08	4.58135e+08	5.28074e+08	414443807	2.46518e+08
V851	HESI(+)	747.641	11.27	10.27	M+H	SM(d18:0_19:0)	SM 37:0	4.09976e+06	3.99122e+06	1.27992e+07	1.37092e+07	1.47554e+07	2.91753e+07	2.03776e+07	2.07809e+07	2.76183e+07	3.32188e+07	3.55047e+07	2.28494e+07	7.85461e+06	1.08744e+07	5.53414e+06	5.86421e+06	915480	7.35235e+06	1.2112e+07	1.09519e+07	9.26135e+06	1.18829e+07	1.59015e+07	7.00781e+06	8.23305e+06	1.15665e+07	8.04802e+06	1.849e+07	1.59281e+07	1.88554e+07	2.71949e+06	1.90469e+06	2.51273e+06	1.64554e+06	2.88618e+06	3.53809e+06
V852	HESI(+)	748.529	7.93	5.91	M+H	PC(O-13:1_22:6)	PC O-35:7	4.26831e+08	345067197	2.58196e+08	2.9522e+08	2.95886e+08	2.42962e+08	198473360	2.73284e+08	1.93991e+08	1.711e+08	1.7285e+08	1.44546e+08	2.04231e+08	3.5623e+08	3.17991e+08	2.51832e+08	3.1216e+08	1.75302e+08	2.33324e+08	4.01353e+08	2.95582e+08	2.61861e+08	2.69877e+08	293177201	4.60727e+08	2.46511e+08	2.20395e+08	2.04467e+08	2.41244e+08	3.346e+08	5.68055e+08	4.76159e+08	2.2983e+08	3.8355e+08	3.08087e+08	1.59731e+08
V853	HESI(+)	748.583	8.48	6.36	M+H	PC(16:0_17:0)	PC 33:0	1.65006e+07	1.477e+07	1.38276e+07	1.56103e+07	1.56646e+07	9.17936e+06	7.11395e+06	3.06521e+06	5.38912e+06	3.6695e+06	4.82979e+06	5.10093e+06	2.07034e+06	4.86657e+06	6.71368e+06	4.99297e+06	2.85281e+06	2.92247e+06	6.55857e+06	9.41517e+06	6.94126e+06	1.08972e+07	9.20552e+06	5.26746e+06	1.62425e+07	5.15019e+06	5.01753e+06	2.74793e+06	6.31296e+06	6.104e+06	7.67792e+06	1.69594e+06	4.2341e+06	4.43669e+06	2.65094e+06	1.14793e+06
V854	HESI(+)	748.622	9.52	7.58	M+H	PC(O-16:0_18:0)	PC O-34:0	1.17763e+08	1.17913e+08	1.1868e+08	1.78199e+08	8.00476e+07	1.29057e+08	1.1461e+08	1.08458e+08	126253521	1.0907e+08	8.04736e+07	1.25593e+08	4.26608e+07	5.98202e+07	1.06302e+08	8.29925e+07	1.04248e+08	5.65981e+07	138968532	193060384	197527431	2.5324e+08	1.9835e+08	1.73867e+08	6.38674e+07	1.30212e+08	1.12978e+08	1.28656e+08	1.50815e+08	1.10072e+08	7.61171e+07	9.20757e+07	6.7456e+07	8.51535e+07	4.93821e+07	5.58729e+07
V855	HESI(+)	749.532	7.16	5.44	M+H	PG(16:0_18:1)	PG 34:1	98124	2.23721e+06	328597	1.8081e+06	1.55246e+06	369606	124318	479100	573162	1.42755e+06	1.36018e+06	303648	367921	696965	393827	546516	767221	570202	357181	1.276e+06	1.03071e+06	720786	123071	226806	0	783587	520362	585346	1.11461e+06	1.04848e+06	642595	2.87085e+06	502610	1.122e+06	1.30446e+06	422873
V856	HESI(+)	750.504	5.63	4.75	M+H	PC(18:3_16:3)	PC 34:6	9.8894e+07	9.90783e+07	9.48059e+07	157433101	9.04649e+07	7.0777e+07	8.00038e+07	5.73054e+07	5.80427e+07	7.67989e+07	8.95537e+07	4.40851e+07	1.7303e+07	2.01999e+07	1.58792e+07	1.57677e+07	7.28705e+06	1.91435e+07	3.96394e+07	2.7757e+07	5.67718e+07	5.64477e+07	4.68158e+07	3.30669e+07	3.36975e+07	2.04647e+07	2.09029e+07	1.49652e+07	3.20739e+07	6.81564e+07	4.0775e+06	178493	1.14377e+06	1.50181e+06	4.56492e+06	3.63844e+06
V857	HESI(+)	750.543	8.21	6.13	M+H	PC(O-13:1_22:5)	PC O-35:6	6.83862e+07	5.29836e+07	4.78986e+07	4.20521e+07	4.52944e+07	2.913e+07	3.57549e+07	1.8153e+07	2.66965e+07	1.38124e+07	1.53297e+07	4.72054e+06	6.19377e+06	3.30667e+07	2.20255e+07	1.13673e+07	1.81295e+07	4.7619e+06	2.74603e+07	7.76015e+07	4.7965e+07	4.09949e+07	4.00478e+07	3.45893e+07	3.7839e+07	2.43674e+07	1.67475e+07	4.54586e+06	1.52721e+07	9.71143e+06	3.48552e+07	2.93319e+07	5.93886e+06	2.13547e+07	2.07009e+07	8.72608e+06
[truncated: 2,580 more rows]
