# Supplementary material for: Lipidomic Analysis on Gender-Dependent Hepatocellular Carcinogenesis in Hras12V Transgenic Mice
Source: Preprints.org preprint supplement (doi:10.20944/preprints202311.1406.v1), 2023-11-22
Supplement: Supplementary file 2 [file supplementary]

Archive with 7 entries (7 files):
- Table.S2.docx
- Table.S3.xlsx
- Table.S4.xlsx
- Table.S5.xlsx
- Table.S6.docx
- Supplementary Figures.pdf
- Table.S1.xlsx
