# Supplementary material for: Lipidomic Analysis on Gender-Dependent Hepatocellular Carcinogenesis in Hras12V Transgenic Mice
Source: Preprints.org preprint supplement (doi:10.20944/preprints202311.1406.v1), 2023-11-22
Supplement: Supplementary file 2 [file supplementary › Table.S3.xlsx]

## Sheet: MP vs MW
Table S3. Detailed information for DELs of vertical paired comparisons among W, P, and T.
Identification number	Lipid name	MW						MP						Paired comparison
		MW1	MW2	MW3	MW4	MW5	MW6	MP1	MP2	MP3	MP4	MP5	MP6	MP/MW p value	MP/MW FC	MP/MW VIP	MP/MW regulation
V20	CE 0:0	2.77706e+08	2.54017e+08	2.05807e+08	2.783e+08	203010152	1.54878e+08	7.63128e+08	8.60587e+08	6.14709e+08	614593426	5.39457e+08	4.06963e+08	0.00015328	2.7658	1.3447	up
V71	LPE 16:0	1645559288	1580951699	987341717	1296587911	1739518636	1427765698	8.19394e+08	5.87435e+08	8.56144e+08	7.88496e+08	8.51147e+08	5.9568e+08	0.00394775	0.51837	1.71945	down
V109	LPC 15:2	7.39753e+08	7.04671e+08	4.46106e+08	5.16691e+08	9.19306e+08	5.89925e+08	3.24367e+08	262796872	3.54457e+08	3.69984e+08	3.43953e+08	2.57465e+08	0.0009771	0.48846	1.14594	down
V120	LPC 15:0	328940014	311898433	4.57385e+08	4.26997e+08	6.49646e+08	3.38616e+08	1.4367e+08	1.06242e+08	135891415	1.90923e+08	2.41692e+08	1.5093e+08	0.0009193	0.38566	1.02728	down
V150	LPC 17:1	6.08864e+08	5.02938e+08	8.72948e+08	8.88496e+08	1097511831	503119314	3.78396e+08	221501478	3.9707e+08	4.14499e+08	5.60531e+08	3.69793e+08	0.008513	0.52344	1.21818	down
V175	Cer 34:1	4.57709e+08	397745135	1.47197e+08	1.95608e+08	2.67818e+08	124785348	5.91684e+08	6.9904e+08	5.51628e+08	6.46909e+08	4.64119e+08	3.94561e+08	0.0023606	2.1045	1.07896	up
V176	LPC 18:1	26980084334	26650267200	47614514280	54425265248	37275942458	20286261774	57073373163	44829577753	52588539025	55240789803	64478496899	46219010482	0.016428	1.5027	9.02767	up
V210	LPC 20:5	4395050407	5298139723	3250752954	3649137579	5690800491	5430094818	2666658282	3063905313	3036955548	3368606474	3092465529	3054652073	0.0040336	0.65971	2.45245	down
V215	LPC 20:4	14961167976	15742019737	19819100172	22615510736	16146096411	12310363189	35709256549	33697122626	33731645768	34512617683	25714916682	26933933916	7.5287e-05	1.8731	8.14248	up
V216	LPC 18:1	475088958	5.34478e+08	9.48898e+08	9.42603e+08	6.26752e+08	2.61308e+08	1210376093	9.02492e+08	1109355557	1333392019	2033970888	1034080581	0.0090578	2.012	1.62413	up
V228	LPC 20:0	2057284920	1832470449	9.74216e+08	9.58932e+08	2252733329	1733144670	6.56152e+08	2.18233e+08	3.01076e+08	3.37764e+08	8.13803e+08	2.58927e+08	0.00060973	0.26364	2.23298	down
V240	LPC 19:1	2.8186e+07	15940649	2.12816e+08	1.36846e+08	7.1182e+07	1.22489e+07	2.79366e+08	1.47116e+08	3.41201e+08	3.86841e+08	844286042	3.60616e+08	0.01183	4.9441	1.05358	up
V244	LPC 19:0	387749605	3.50325e+08	5.91447e+08	5.65782e+08	9.56326e+08	4.65744e+08	1.54409e+08	1.96994e+08	2.41339e+08	2.48026e+08	3.05276e+08	2.3229e+08	0.0055619	0.41549	1.08528	down
V253	LPC 20:4	5.44882e+08	675734511	4.89745e+08	715767190	6.25058e+08	2.58303e+08	1499441304	1045707461	9.23973e+08	1777161364	1199066775	7.50009e+08	0.0033809	2.1742	1.58944	up
V265	LPC 22:5	2884094400	2811061954	3246646154	4396209410	4656908429	1685165358	5616929780	5445457603	4794884510	6075906292	8345666316	3673337180	0.012156	1.7252	3.19251	up
V271	LPC 20:1	3866351509	4000927726	7160600959	9010593504	8599599556	1621999238	15218156492	6137571193	8803858414	9637338905	20239250575	8088760447	0.046627	1.9885	4.96611	up
V281	LPC 22:3	1438377250	1111069211	517632879	5.73835e+08	1828451858	8.1638e+08	4.48611e+08	1.33176e+08	2.01787e+08	2.36053e+08	6.73641e+08	1.44649e+08	0.0085917	0.29239	1.62115	down
V354	Cer 40:2	1486391793	1434253853	4.80245e+08	5.38413e+08	1070318278	9.81932e+08	331232098	2.29154e+08	221795710	2.14806e+08	2.67457e+08	188828419	0.0015508	0.24255	1.76439	down
V357	DG O-36:4	1.76994e+08	2.31886e+08	3.49804e+08	3.53223e+08	2.72821e+08	1.77719e+08	4.43376e+08	6.64073e+08	6.5523e+08	631909770	6.92452e+08	6.73026e+08	0.00394775	2.4065	1.27444	up
V359	Cer 40:1	1010590920	1132065310	2.24483e+08	2.44443e+08	5.57969e+08	6.77057e+08	1.02945e+08	1.25181e+08	1.61087e+08	8.91178e+07	9.72926e+07	1.69702e+08	0.0076098	0.19376	1.45402	down
V393	Cer 41:2	4.46171e+08	4.17657e+08	3.40142e+08	4.4721e+08	5.43935e+08	298256702	8.65719e+07	101791589	1.21159e+08	1.29887e+08	1.03572e+08	8.88106e+07	6.4445e-06	0.25339	1.15067	down
V405	TG O-36:3	2.36892e+08	3.16251e+08	4.89155e+08	6.0956e+08	6.83629e+08	2.38753e+08	1059627278	6.3769e+08	1172524123	1175650176	1266649973	9.90792e+08	0.00043651	2.4485	1.62838	up
V410	Cer 40:2	1486584997	1483334256	5.01287e+08	5.55266e+08	1037968459	984174830	3.7947e+08	2.29495e+08	2.15238e+08	2.11618e+08	3.01785e+08	2.0474e+08	0.0017237	0.25499	1.75587	down
V447	Cer 41:4	6.08622e+08	5.6487e+08	1.6322e+08	1.57831e+08	3.60069e+08	4.27625e+08	2.69394e+07	3.97909e+07	5.67409e+07	3.30009e+07	3.54553e+07	5.63727e+07	0.0015556	0.1088	1.20814	down
V448	WE O-42:4	9.30209e+08	9.9027e+08	6.49794e+08	7.24318e+08	8.78685e+08	6.7283e+08	2.34441e+08	1.78175e+08	1.91981e+08	2.0334e+08	2.29817e+08	1.78028e+08	1.3817e-06	0.25088	1.64571	down
V460	Cer 41:2	5.42076e+08	586437663	4.35157e+08	5.78443e+08	6.7881e+08	3.79292e+08	1.12013e+08	1.23636e+08	1.55987e+08	1.64216e+08	1.28107e+08	1.24895e+08	5.0716e-06	0.25275	1.30897	down
V466	TG O-36:3	3549437715	4362018165	6549830357	8522933812	10362164811	3388851066	16232550845	9935625738	17655375692	18003027154	18768818651	13587857322	0.00034382	2.5638	6.41095	up
V471	DG 36:2	3698260068	3924891770	4865047631	6211464901	5977764042	2473090741	11119256614	5419912053	12124428690	10091048224	14001102567	9611987421	0.001244	2.2971	4.86588	up
V477	DG 36:1	5.14207e+08	5.2786e+08	6.1384e+08	8.17974e+08	7.49812e+08	3.28556e+08	8.85483e+08	7.05151e+08	1102862962	955589480	1398921921	1113422886	0.0047994	1.7345	1.31834	up
V480	TG O-36:3	2579325845	3393722764	5843550452	6861972373	8088343008	3122849188	9264040975	8114855819	13227190598	14898453264	15028663486	10781510962	0.0010406	2.3859	5.33733	up
V485	DG 36:2	4736865808	4974044224	6677583626	7823508071	7487616800	3790265210	9410007313	6117601443	11812938374	10958450761	13520824176	10904842302	0.0040914	1.7674	4.23939	up
V486	TG O-36:2	2.42329e+08	2.5493e+08	3.71188e+08	4.68794e+08	4.18738e+08	2.307e+08	5.87218e+08	3.4795e+08	7.52907e+08	7.90185e+08	1049638433	8.06013e+08	0.003914	2.1815	1.21234	up
V487	TG O-38:5	9.11807e+07	3.563e+08	4.96708e+08	1.3279e+08	1.37711e+08	3.32338e+08	7.84894e+08	4.67552e+08	2.72381e+08	1095135865	4.17469e+08	1118980643	0.022786	2.6867	1.11545	up
V490	Cer 42:4	1234335057	1354417556	330902390	3.1442e+08	7.38119e+08	9.53805e+08	8.40968e+07	1.53309e+08	1.83117e+08	8.97952e+07	8.79617e+07	1.64643e+08	0.0033414	0.15488	1.7209	down
V508	Cer 42:2	1236934404	1373122071	8.28981e+08	9.39543e+08	1125621217	8.43815e+08	2.89632e+08	6.56433e+08	2.43298e+08	2.54368e+08	3.05116e+08	2.2395e+08	0.00394775	0.31077	1.71028	down
V542	DG 38:5	1447267777	1462138585	2138077072	3322488398	2583786228	1153150348	4085868194	3256337420	3609858210	4351542604	5530803019	3070336828	0.0027622	1.9745	2.9728	up
V549	DG 38:4	9.18964e+08	1007139884	1383423438	1814208583	1607576416	6.57427e+08	2837301912	1232377391	2511732277	3105749152	5259058444	2574012275	0.013794	2.3712	2.53927	up
V552	PEt 31:0	1121580473	1216889952	1018252782	1118889623	7.78935e+08	1192086249	6.51601e+08	5.57135e+08	4.53042e+08	6.10761e+08	7.08542e+08	8.51527e+08	0.000481	0.59451	1.35788	down
V557	DG 38:5	7.05483e+08	8.2617e+08	1027055882	1190576202	1349119382	6.91386e+08	1852466030	2044500901	1672745302	2309786500	2630105381	1603090874	0.00030194	2.0921	2.16477	up
V564	TG O-40:7	1090062085	1200769910	1538119191	1867543943	1788843723	8.14195e+08	2536196828	1635383418	2618396203	3037618157	4616587590	2533230795	0.0079547	2.0456	2.38613	up
V565	TG O-40:7	1.882e+08	1.99494e+08	2.91078e+08	3.18979e+08	2.75984e+08	1.26246e+08	4.67295e+08	3.04058e+08	4.73345e+08	569481543	8.41271e+08	4.91921e+08	0.0040539	2.2482	1.07265	up
V604	DG 40:7	2.8051e+08	3.26206e+08	3.40613e+08	3.87534e+08	1180435744	2.82136e+08	1103228601	5.32011e+08	5.94969e+08	9.41887e+08	1539097617	6.05783e+08	0.037373	1.9007	1.25525	up
V606	DG 40:7	1946338119	2511180591	2990965790	3504679380	8253832985	2243628408	8710792582	4655663606	5390579989	8860583545	14109797498	6479825122	0.0163092	2.2474	4.13524	up
V612	TG O-40:6	1.66166e+08	1.54322e+08	3.89648e+08	5.26017e+08	3.20423e+08	5.97177e+07	1158734891	5.55939e+08	9.54973e+08	2103751183	3376698158	1117092870	0.013704	5.7336	2.11596	up
V622	DG 40:5	3.17599e+08	315565899	799984724	9.65274e+08	8.47162e+08	2.5729e+08	1818455871	1445329537	1646973175	2240938313	3382923224	1557911828	0.0012851	3.4522	2.44608	up
V626	DG 40:7	8.31761e+08	1062621677	1296952521	1384815770	3055853097	9.4516e+08	2657978977	1430811333	2153425593	3488410559	5072527463	2383925851	0.0249747	2.0038	2.30279	up
V629	DG 40:4	1.91233e+08	183818423	3.41973e+08	447591393	223864933	8.5718e+07	7.96166e+08	5.93642e+08	7.34062e+08	7.7878e+08	1428560495	7.87525e+08	0.00394775	3.4722	1.57586	up
V641	TG O-42:8	2.91902e+08	309245176	7.78719e+08	8.83423e+08	7.39704e+08	2.53809e+08	1378384636	1197375224	1451361575	2118707757	3126115016	1479725235	0.0028364	3.3013	2.23449	up
V652	TG O-42:7	2.40575e+08	242804422	4.94175e+08	569254563	3.29503e+08	1.28967e+08	8.73955e+08	6.66731e+08	8.95644e+08	1014744099	1760385691	1033310340	0.0018172	3.1142	1.67761	up
V676	PC 30:1	9.40443e+08	8.06842e+08	1494904776	1772794832	620922156	9.45212e+08	3.64592e+08	1.60392e+08	3.00286e+08	314652206	4.83991e+08	3.87746e+08	0.0021194	0.30567	1.691	down
V679	SM 34:0	3.80428e+08	3.46014e+08	5.39361e+08	499403423	4.08479e+08	4.11337e+08	6.63173e+08	1191421082	8.04892e+08	7.93863e+08	492259201	9.867e+08	0.0037563	1.908	1.30168	up
V682	PC 30:0	1259594306	1277237637	2150918598	2546814673	1209356164	1039906265	9.99156e+08	874877920	1051644187	8.25665e+08	1016580045	9.09477e+08	0.031171	0.59864	1.41583	down
V705	DG 42:7	2.88596e+08	3.31934e+08	5.06033e+08	6.91073e+08	456199616	2.29114e+08	7.97934e+08	4.62438e+08	8.1663e+08	9.09807e+08	2010902620	8.19753e+08	0.0104056	2.3242	1.40702	up
V714	PE 34:3	4.10755e+08	3.44555e+08	1.76189e+08	2.56085e+08	2.55026e+08	2.97986e+08	7.46614e+07	5.09073e+07	7.1166e+07	5.0059e+07	6.13216e+07	3.52461e+07	4.1259e-05	0.19727	1.01564	down
V727	PE 34:2	2163899894	1687952761	4.77304e+08	5.8312e+08	9.27912e+08	1361324749	3.26687e+08	3.49097e+08	2.63869e+08	2.52724e+08	2.01265e+08	1.45043e+08	0.0058629	0.21366	1.96724	down
V733	DG 42:7	312560102	3.57358e+08	4.96716e+08	600926140	4.39748e+08	260548623	6.05721e+08	411167223	7.3398e+08	749259341	1431908609	701943872	0.037407	1.8777	1.13649	up
V760	SM 36:4	4.13654e+08	4.34295e+08	3.8082e+08	6.35005e+08	3.95074e+08	2.88812e+08	7.13676e+08	1305749511	7.37851e+08	7.63056e+08	4.84318e+08	6.38771e+08	0.017731	1.8226	1.19418	up
V767	Co 8:0	2092663955	2199878127	1881438168	2473534437	3413202105	2003512479	1577758926	1299601637	1357642503	1258748835	1229819665	1116506249	0.0014099	0.55745	1.97682	down
V775	PC 32:2	8465779535	9104806196	9851361971	11557868895	6554811615	9286989967	5680737706	3411936563	4580215587	4066835832	5245028660	4284971297	0.00011226	0.49743	4.4095	down
V782	PC 32:1	22966022118	21507686625	16830416210	21916780541	13654233386	18821393603	13258403112	6867345756	11560492116	9787836125	11987497596	9765290301	0.00047066	0.54649	6.0764	down
V786	PC 32:0	2554195775	2380051552	1845179717	2395383358	1501381943	2075456814	1407542933	7.26949e+08	1146563575	1045435261	1365256252	1056408766	0.00038623	0.5292	2.06178	down
V797	BMP 36:6	2033034176	1308038204	3.2592e+08	3.84122e+08	7.47322e+08	1337118258	314103240	2.93367e+08	2.37479e+08	2.61394e+08	144045372	126176749	0.015076	0.22436	1.79058	down
V806	PE 36:4	4083735187	3213989382	1989095688	2579653160	2191624518	2246525575	1997109320	1687080455	1679148875	1980689286	1706402426	1322353955	0.015606	0.63619	1.81492	down
V823	PE 36:3	1487313241	1397252049	8.29369e+08	8.20683e+08	1212092090	1175389619	6.85242e+08	622872915	6.20802e+08	6.12024e+08	4.97345e+08	407545502	0.00075687	0.4978	1.55109	down
V834	PC 33:2	4543050158	4104474677	3020008845	3459915598	4586818181	3494049078	1962403622	1795590551	1541905683	1919820973	1959036298	1671270364	1.8368e-05	0.46751	2.97413	down
V835	PE 36:2	1225774529	1069803225	6.20186e+08	6.26641e+08	7.359e+08	8.79475e+08	4.07716e+08	3.89926e+08	3.9574e+08	3.39921e+08	2.8881e+08	3.01459e+08	0.00061707	0.41172	1.47768	down
V838	Co 8:0	3811255925	4009428326	3327283650	4457043413	6084404008	3582822839	2921371906	2450363586	2537992266	2292473855	2239015597	1958573227	0.0017084	0.56979	2.59136	down
V839	PC O-34:2	7.97385e+08	6.96144e+08	6.834e+08	8.02377e+08	5.34771e+08	5.44638e+08	4.01624e+08	3.83852e+08	4.79262e+08	313829369	307562627	3.47444e+08	0.00023282	0.55032	1.09305	down
V845	PC 33:1	3181333015	2418521293	1920034679	2509103779	2089723422	2044494173	1165278225	1033052772	1108275282	8.46053e+08	1033330891	9.52487e+08	4.2456e-05	0.43341	2.38037	down
V850	phSM 36:1	1372583229	1029442131	7.8791e+08	1037813702	8.6026e+08	8.72506e+08	5.09649e+08	4.0955e+08	4.55332e+08	3.41385e+08	4.16342e+08	4.00707e+08	7.6376e-05	0.42496	1.55364	down
V861	PC 34:5	9.00963e+08	9.91068e+08	1187033114	1254615086	8.35292e+08	1385244095	4.92626e+08	3.75106e+08	625247409	5.51209e+08	6.62611e+08	5.70294e+08	0.00023148	0.5	1.52256	down
V871	PC 32:1	7.58351e+08	1044803084	8.10792e+08	9.10664e+08	8.33415e+08	1004135670	380585874	2.65565e+08	5.68248e+08	500632382	5.04896e+08	5.62557e+08	7.5243e-05	0.51891	1.39424	down
V873	PC 34:4	1181005368	9.70556e+08	1060184655	1381533220	3.60663e+08	2.77487e+08	3.08116e+08	1.95219e+08	4.71954e+08	2.85016e+08	2.92075e+08	1.53642e+08	0.011203	0.32611	1.36938	down
V883	PC 34:3	20802713493	23608504309	10702726609	11300118455	11842413419	18275460070	9003878648	8213994462	9144892936	8711355883	8187071996	8814028849	0.0084749	0.53946	5.58548	down
V898	BMP 38:8	1313712825	1359277026	1032625478	1280891661	1285038484	1362564744	7.37169e+08	3.25081e+08	552896479	565993586	5.94563e+08	3.90675e+08	0.00394775	0.41477	1.84987	down
V905	PC 34:0	3274303275	3161462132	3643551205	4711812441	3949691712	3534461865	7113770033	7121186160	6961491322	7020265509	6371532125	5921417512	1.6805e-06	1.8186	3.76137	up
V909	PC 35:6	10200308164	9008040543	5057310521	5276423685	5398531809	5882722825	5200039334	5113677124	3758837414	3639024164	3559890441	2763709033	0.0104056	0.58876	3.10999	down
V924	PE 38:5	6.26043e+08	4.59483e+08	8.97659e+07	9.12437e+07	160847339	3.54779e+08	1.53395e+07	1.34801e+07	1.03937e+07	1.24084e+07	7.35518e+06	6.05327e+06	0.0097011	0.036489	1.08533	down
V973	PC 35:2	7875311520	7171806058	4297872399	5299500437	7263339637	5801903567	2992911265	4133863537	3586391934	2803545016	2857592002	2909791771	0.00045933	0.51138	3.50424	down
V975	PC O-36:2	9.701e+08	1047977445	1047471023	1291309809	7.48358e+08	8.39051e+08	1.18143e+08	147674418	1.95532e+08	1.01009e+08	1.28336e+08	1.95385e+08	8.6888e-07	0.14906	1.91828	down
V981	PC 35:1	2949552872	2439727152	2822077753	2982758548	2706070547	2335126717	1271365307	1433082713	1464470023	1267730462	1451681776	1384136268	4.2438e-07	0.50954	2.40284	down
V993	PC 36:6	2756089073	3226576043	3109675814	4308778136	2872749152	3214390108	2051961185	1411979513	1528924219	1985257343	3032878059	1428944195	0.002681	0.58702	2.3456	down
V1000	PC 36:5	8.06527e+08	8.38571e+08	5.09814e+08	4.05699e+08	5.99649e+08	7.74389e+08	2.58666e+08	320207793	2.96522e+08	2.12436e+08	2.24897e+08	2.47393e+08	0.00033621	0.39651	1.33792	down
V1001	PC 36:5	1988665799	1991574119	2480236062	1880491555	1388932853	2451609637	1463129707	1117103534	1069323043	1308902311	1455708271	1399799739	0.0022876	0.64146	1.69574	down
V1024	PC 36:3	3114399574	3333246449	4001545990	7058473801	6274530556	2594526296	8563240490	7889653107	8262731161	3853152068	8110611820	6367093554	0.0249747	1.632	3.27588	up
V1027	phSM 39:3	8.05141e+08	801553567	6.8039e+08	7.43234e+08	9.14481e+08	8.7728e+08	5.46003e+08	5.12734e+08	5.67848e+08	5.50084e+08	5.15021e+08	4.8852e+08	2.2828e-05	0.65951	1.0934	down
V1037	PC 36:2	9.06737e+08	1029997991	8.57143e+08	9.11193e+08	6.79827e+08	1160828636	1029181747	1393725220	1277964130	998231379	1063774431	2744107318	0.037373	1.534	1.11766	up
V1083	PC 37:6	1973168505	1466785043	1076117793	1352885068	1544341662	1390665343	6.27597e+08	9.45664e+08	516222100	7.21243e+08	6.79181e+08	5.87192e+08	0.00016187	0.4631	1.77813	down
V1102	TG 46:1	5.20653e+08	5.32854e+08	1002963133	1153134152	3.174e+08	6.1423e+08	2.697e+08	1.25428e+08	4.08433e+08	2.33448e+08	2.95396e+08	5.82503e+08	0.028902	0.4624	1.0673	down
V1134	PC 37:2	7.29613e+08	6.13924e+08	3.81714e+08	3.66853e+08	9.1699e+08	6.34939e+08	1.38387e+08	1.36113e+08	137862978	1.25928e+08	1.64529e+08	1.28349e+08	0.00027766	0.22809	1.38941	down
V1138	PC 38:8	4.92628e+08	5.10487e+08	1056627677	1030849983	7.73486e+08	5.18691e+08	1309000606	7.86775e+08	1359843541	1419598440	1297382783	1343470529	0.0104056	1.7149	1.44049	up
V1139	PC 36:5	2691545134	2469422043	1439119748	1391643767	1588463147	2819507543	8.48811e+08	1519837666	1357395155	1062322505	9.2855e+08	1244734048	0.010892	0.56144	2.0412	down
V1141	PC 37:1	6.28191e+08	5.20039e+08	5.38023e+08	672198688	5.83315e+08	4.97085e+08	2.41999e+08	1.46929e+08	1.69956e+08	2.37179e+08	9.02727e+07	1.33565e+08	6.9013e-07	0.29658	1.32408	down
V1155	PC 38:6	20138518723	17878391304	20151981167	23993311065	20111991307	14470111334	35129684225	34705733753	31127941273	31078018275	28320580127	27331966612	7.1839e-05	1.6077	7.35622	up
V1169	PC 38:5	10718407494	10494401464	14855631594	19396774354	17413407162	6225061435	40383185552	32485691767	32811202830	26918108194	22285324828	21477357686	0.001074	2.2295	8.29413	up
V1171	PC 38:5	4591478623	3481885942	1420963292	1792380048	1818192271	2903649299	8.20553e+08	9.88284e+08	6.52698e+08	5.02515e+08	5.88692e+08	457719737	0.0027043	0.25052	2.8817	down
V1172	PC 38:5	2660978308	2430722302	5854857941	8329311763	1719356692	2518718915	9841796497	4153301472	8861918229	11207931317	10650328003	9642602975	0.0060642	2.3117	4.39051	up
V1190	PC 38:4	1387053034	1476202220	1751159218	1954914858	5897962608	1230094611	8880338527	3765798594	2474508109	8392857038	8613905820	9112092820	0.0104056	3.0108	4.04325	up
V1193	PE 41:4	9.84611e+08	8.92302e+08	2136703697	2377972823	8.50883e+08	862089688	1908455137	2774037789	3054834898	2891071939	2898502496	1699494439	0.0249747	1.8787	2.13098	up
V1195	MePC 37:4	2269399086	2545356870	2832013995	3263584887	2391925300	2322597813	6.69821e+08	2468882066	2351182919	7.67079e+08	8.92564e+08	7.7148e+08	0.037373	0.50695	1.94465	down
V1208	PC 38:3	1878293656	1912239000	3503018945	4039158691	1783027904	1630826089	4065822879	3176601127	4265104397	3896113286	3635241726	5164408836	0.0249747	1.6413	2.35943	up
V1214	SM 42:2	4807347064	3874316607	4827058347	6562394704	4780116370	4415850780	8251421982	7920462323	8056098356	7406807638	5867571980	6912673768	0.00065896	1.5176	3.27078	up
V1220	PG 38:5	1.68196e+08	183233066	2.7257e+08	2.00432e+08	1.5359e+08	2.74129e+08	9.95219e+08	936868472	4.72039e+08	6.24164e+08	5.62971e+08	6.04692e+08	0.00027846	3.351	1.45365	up
V1223	PC 38:2	15048024206	13002297615	3654484795	3332592126	6717027477	11804112886	2747254712	1050349574	1272726649	1122600357	1610708056	1078058783	0.00394775	0.16583	5.62633	down
V1241	PC 38:1	1486143768	1237343987	3.80224e+08	4.80389e+08	6.45097e+08	1071644236	3.20596e+08	6.85115e+07	9.55486e+07	1.40236e+08	2.53825e+08	98622975	0.0031807	0.18437	1.73467	down
V1252	MePC 37:1	7.82025e+08	6.42165e+08	2.30535e+08	2.36052e+08	3.38666e+08	5.46222e+08	167308510	3.56441e+07	9.27227e+07	7.61417e+07	1.3684e+08	9.80504e+07	0.0035245	0.21858	1.23486	down
V1258	PG 38:3	1.86935e+08	2.22455e+08	1.55587e+08	1.28649e+08	1.46197e+08	3.24334e+08	5.93013e+08	8.08985e+08	4.03673e+08	4.11327e+08	3.12967e+08	5.62375e+08	0.0021554	2.6563	1.19234	up
V1271	PC 39:6	1801657193	1317886552	6.26678e+08	585282501	1216503188	9.75394e+08	3.04104e+08	5.40631e+08	3.48584e+08	3.25901e+08	2.4823e+08	2.72439e+08	0.0030498	0.3127	1.70792	down
V1276	TG 48:2	3614793535	4618733651	7421234433	8575070955	3672920058	4387533100	3437593470	711259880	4118548069	2339177983	3342479457	4361796614	0.044981	0.56707	2.83506	down
V1287	PC O-40:5	1.36439e+08	114711868	2.17656e+08	2.10054e+08	1.47914e+08	101344600	3.49881e+08	6.44153e+08	4.42121e+08	321282771	3.08698e+08	376355794	0.00098869	2.6317	1.06051	up
V1290	TG 48:1	3174619452	2947788487	3628971555	4489258317	2311400641	2792716788	1928362662	6.93304e+08	2139982418	1590901754	1828588215	2676630894	0.0061862	0.56128	2.32095	down
V1312	PC 39:3	6.42921e+08	5.52539e+08	3.96928e+08	4.9241e+08	6.2134e+08	4.18115e+08	206742234	8.86824e+07	1.52977e+08	1.54238e+08	126712239	1.12062e+08	7.4383e-06	0.26932	1.29213	down
V1331	PC 40:8	1765601148	1479625996	2352712702	3040093789	2761822965	1086647103	8600133120	7583225900	7810501157	8201347860	6743196663	7594619077	6.6045e-08	3.7267	5.13514	up
V1341	PC 40:7	16018500635	14124084870	15381446159	19605094350	18838295646	9364470819	35644576105	35049093770	26533187296	26965260654	25423465914	22085056584	0.00068163	1.8397	7.583	up
V1354	PC 38:3	9.18085e+08	7.68689e+08	8.10147e+08	8.10731e+08	6.36109e+08	4.12926e+08	1125006093	1765936639	1364737013	1069130653	962502400	1327587023	0.0028274	1.7479	1.52279	up
V1361	TG 49:2	6.45118e+08	5.93202e+08	7.34001e+08	9.1634e+08	5.57e+08	6.015e+08	2.12955e+08	9.8033e+07	2.53165e+08	1.8601e+08	1.87612e+08	2.35536e+08	9.9618e-06	0.28991	1.44329	down
V1365	MePC 39:6	6.0686e+08	3.31483e+08	2.99664e+08	4.38208e+08	2.99891e+08	270216728	1130455854	1488868237	7.21586e+08	7.61057e+08	6.51868e+08	4.95566e+08	0.01022	2.3369	1.41581	up
V1380	PC 38:2	2737044014	2631948404	9.56665e+08	7.20178e+08	1531107400	2727797013	6.80919e+08	2.85935e+08	2.85739e+08	296306368	4.82722e+08	3.81805e+08	0.0032495	0.21349	2.54111	down
V1382	PC 40:5	1.44944e+08	1.61318e+08	2.77933e+08	2.6079e+08	1.26481e+08	1.64687e+08	2.73456e+08	490406498	485754001	5.17562e+08	5.46753e+08	5.20065e+08	0.00648531	2.4944	1.08461	up
V1383	PC 40:5	2862902669	2734439657	8.72799e+08	8.94676e+08	1478587265	2306532148	529410167	1088023338	5.91485e+08	5.02048e+08	3.55266e+08	3.67587e+08	0.0071914	0.30797	2.32984	down
V1384	PC 40:5	9.72465e+08	8.3447e+08	1174423714	1522204214	1205572317	7.31763e+08	4385463637	2193215381	2470633853	2149933971	2549081768	1550905782	0.0049292	2.3753	2.37165	up
V1397	PC 40:4	6433085173	5569311050	2102880841	2243420306	3710045642	4867262391	3041442707	1344679593	1351933230	1549075735	2066170169	1158160081	0.011623	0.42171	3.03767	down
V1399	PC 40:4	3.89335e+08	5.78029e+08	2.02179e+08	1.75171e+08	3.38971e+08	6.34451e+08	1.66786e+08	8.89974e+07	1.31687e+08	9.39067e+07	2.034e+08	9.79158e+07	0.0092195	0.33764	1.02493	down
V1412	PG 40:6	4.00735e+07	2.31357e+08	4.17311e+08	3.02523e+08	212960059	1.68672e+08	8.40768e+08	2.72395e+08	5.94925e+08	6.51731e+08	7.84582e+08	9.58408e+08	0.0021333	2.9884	1.2771	up
V1413	BMP 40:6	1.46341e+08	1.77429e+08	4.80011e+07	5.17582e+07	4.34581e+07	8.25732e+07	3.76339e+08	7.71367e+08	4.41655e+08	4.83826e+08	1.17323e+08	1.41606e+08	0.015157	4.2436	1.1157	up
V1416	PC 40:3	1182026838	9.19268e+08	310864663	3.22681e+08	5.53348e+08	8.65433e+08	3.62247e+08	1.60947e+08	2.06856e+08	1.83405e+08	2.82061e+08	2.12423e+08	0.011109	0.33897	1.35961	down
V1417	PC 40:3	9.84412e+08	1338997480	6.94444e+08	8.76497e+08	1123366036	1161145483	8.11243e+08	4.92479e+08	6.41245e+08	5.44749e+08	8.38626e+08	6.0426e+08	0.0065269	0.63646	1.20396	down
V1428	MePC 39:3	6.16054e+08	481371500	191537653	2.13208e+08	289174463	4.4668e+08	193893974	8.04823e+07	9.27638e+07	8.86057e+07	1.50216e+08	1.1173e+08	0.0051292	0.32068	1.02104	down
V1436	TG 50:5	4.23329e+08	473264207	1.88287e+08	252313798	2.78513e+08	1045066342	1.86578e+08	8.77059e+07	1.87243e+08	1.94966e+08	1.97595e+08	1.25863e+08	0.0104056	0.3683	1.02475	down
V1480	PC 41:6	1603001368	1232903172	6.51892e+08	6.73443e+08	1480172045	1138141602	2.65002e+08	3.47489e+08	3.15886e+08	3.14623e+08	2.5954e+08	2.38091e+08	0.00044183	0.25675	1.86205	down
V1501	PC 40:8	5.52156e+07	5.72458e+07	1.8806e+08	2.08417e+08	1.88202e+08	5.17266e+07	439369817	5.00228e+08	555369140	5.53994e+08	4.91327e+08	5.78863e+08	0.00394775	4.1652	1.34263	up
V1519	PC 42:10	6319768859	6092111613	5381101657	6103476075	9151283994	4131907595	12999139635	13962140002	12468702298	12610910092	11600515294	11676039400	8.4532e-06	2.0258	5.39246	up
V1521	PC 40:7	4.01659e+08	4.55434e+08	6.55588e+08	7.63079e+08	7.44797e+08	3.28121e+08	1034049843	1308299255	1313415631	1346765547	1140557456	1267774527	2.2198e-05	2.2131	1.75901	up
V1551	PC 40:5	2.48712e+08	2.31492e+08	3.83775e+08	4.29461e+08	1.74638e+08	2.52121e+08	4.81621e+08	7.52395e+08	6.38141e+08	755899180	6.63783e+08	6.62816e+08	6.7863e-05	2.299	1.28305	up
V1558	TG 51:4	8.25331e+08	9.95525e+08	8.78571e+08	1040568769	1298140819	1085583302	5.79955e+08	2.83734e+08	7.23903e+08	5.08493e+08	5.6975e+08	5.43042e+08	0.00030422	0.52401	1.45619	down
V1570	PC 42:7	2.26298e+08	2.21278e+08	2.8725e+08	2.85523e+08	1.77115e+08	2.11314e+08	3.63586e+08	5.89652e+08	5.13149e+08	4.42919e+08	3.8783e+08	5.1586e+08	0.00014278	1.9968	1.02553	up
V1572	PC 40:4	1162718802	1119397512	538911090	5.33232e+08	876924395	1120876582	5.98497e+08	3.18191e+08	2.82896e+08	364228444	446303945	2.88653e+08	0.0028546	0.42951	1.44896	down
V1574	TG 51:3	2228333115	2560514851	2310032458	2785948343	3104414281	2529289306	1172418811	4.81029e+08	1304984171	1013805688	1103963388	1072434648	4.5232e-06	0.39621	2.67708	down
V1589	PC 42:6	5148475453	4423336463	1003448751	9.06537e+08	2903216412	3739976575	8.3955e+08	3.67665e+08	3.10525e+08	3.59514e+08	5.41631e+08	2.60602e+08	0.0052885	0.14783	3.2564	down
V1592	TG 51:2	2049562209	2292212587	2679959450	3030932118	2792563878	2505728052	1182082123	5.02534e+08	1344565630	1155719693	1106881980	1163731189	0.00394775	0.42053	2.59016	down
V1611	PC 42:5	8.57736e+08	7.1155e+08	2.96697e+08	3.05218e+08	5.31199e+08	6.38372e+08	3.20226e+08	1.88332e+08	1.77341e+08	1.83534e+08	2.10632e+08	130146182	0.0039649	0.36226	1.20009	down
V1615	TG 51:1	4.29001e+08	4.88155e+08	4.25584e+08	4.25084e+08	5.23175e+08	5.35284e+08	1.39357e+08	1.35184e+08	1.59971e+08	1.63623e+08	1.35035e+08	1.66518e+08	4.0826e-08	0.31833	1.21697	down
V1623	TG 51:3	3.87319e+08	3.64041e+08	3.3486e+08	3.59427e+08	3.81516e+08	3.3374e+08	1.10148e+08	7.49925e+07	2.0181e+08	1.31938e+08	1.19569e+08	1.20789e+08	2.7794e-07	0.35136	1.03669	down
V1624	PG 42:7	4.35832e+08	4.28912e+08	2.40896e+08	1.79341e+08	4.37806e+08	3.40107e+08	8.91798e+07	6.89117e+07	7.77197e+07	7.57609e+07	7.75815e+07	1.15099e+08	0.00021446	0.24444	1.05804	down
V1638	TG 51:2	4.70214e+08	4.24659e+08	3.87243e+08	4.03352e+08	4.32639e+08	457789228	1.42963e+08	9.27307e+07	1.89102e+08	1.61906e+08	1.40232e+08	1.57355e+08	2.7324e-08	0.34329	1.1519	down
V1655	TG 52:5	4.03145e+08	4.88937e+08	8.48958e+07	5.22953e+07	2.62095e+08	6.87805e+08	4.64155e+07	2.81503e+07	1.16115e+08	1.48283e+08	4.95704e+07	3.77538e+07	0.029564	0.21539	1.04101	down
V1680	d5-TG 52:5	2.80446e+08	4.12822e+08	4.28587e+08	1.34501e+08	6.20737e+08	5.45235e+08	103141152	1.53045e+08	6.38394e+07	8.96071e+07	7.34256e+07	7.27475e+07	0.001694	0.22945	1.08518	down
V1681	PC 44:13	6.42983e+08	6.17506e+08	6.74987e+08	676388116	1110213544	5.99409e+08	9.17283e+08	1255376622	1442911456	1474079183	1306220329	1418140686	0.00648531	1.8082	1.52226	up
V1697	TG 52:1	3603059397	3890704147	3711931674	3857701792	3380563195	4626624121	2331815983	1868169924	1882129194	2027509466	2208234447	2636539529	1.2225e-05	0.56151	2.76835	down
V1731	TG 52:1	1133027898	1005321185	777889187	9.40406e+08	9.53841e+08	1176303406	6.68366e+08	5.54546e+08	6.45886e+08	6.9731e+08	6.90029e+08	7.36534e+08	0.00040881	0.66691	1.21381	down
V1735	PC 42:6	8.93961e+08	7.97441e+08	2.06893e+08	1.47934e+08	6.69433e+08	935685133	115370579	4.59377e+07	4.6052e+07	6.27617e+07	9.15097e+07	3.92265e+07	0.003419	0.10978	1.5164	down
V1763	TG 53:3	1797497631	2011044952	2559453130	2760735193	3284445366	2377334490	1659931922	8.34193e+08	1906990534	1471881515	1671828779	1845569442	0.0075649	0.63489	1.92471	down
V1777	TG 53:2	9.59804e+08	1217663954	1569207297	1607637825	1792206605	1391208345	6.44545e+08	3.37819e+08	7.00978e+08	6.49011e+08	6.81079e+08	7.40639e+08	0.00394775	0.4397	1.85974	down
V1810	TG 55:5	3.78759e+08	4.02603e+08	3.97651e+08	4.08066e+08	5.19111e+08	4.25644e+08	1.58503e+08	1.04047e+08	2.16356e+08	1.77834e+08	1.68795e+08	1.73192e+08	0.00394775	0.39447	1.07874	down
V1840	TG 54:4	7.21447e+07	8.84904e+07	7.30829e+08	8.94679e+08	8.10611e+08	5.40123e+08	1376007430	8.35322e+08	1430790037	1518602905	1546672351	1295624685	0.0012374	2.5513	1.83854	up
V1841	TG 54:4	15298053782	18767826770	20537252270	22847820177	21002713883	16406795157	33983940288	31045852747	32674594216	31616086787	32195883647	28667283537	3.8931e-06	1.6558	7.62466	up
V1846	d5-TG 54:6	3.24323e+08	1175038161	1076028889	1289509197	7.49465e+08	1165076571	1.26502e+08	105964019	1.76434e+08	1.65717e+08	2.27408e+08	2.24299e+08	0.00034901	0.17758	1.78122	down
V1847	d5-TG 54:6	3.36597e+07	3.56946e+07	4.91165e+08	2.42546e+08	9.53732e+07	1.84497e+08	8.65652e+08	2.76698e+08	9.26278e+08	9.34055e+08	1091277916	8.59328e+08	0.00648531	4.5739	1.55531	up
V1853	TG 54:3	11397259782	13918335950	18717526902	21715207163	16626419068	12446398021	29415637524	18890395974	30036164850	26707303554	29054138623	30338701431	0.00648531	1.7342	6.87576	up
V1855	TG 54:3	11130398232	3538068759	18188293881	21206753038	16237120184	12195187111	28608750499	18551047730	26149448891	24441954685	26427145280	31446466721	0.0028537	1.8865	6.92194	up
V1875	TG 54:1	9.27128e+08	1250217451	4.73942e+08	4.11771e+08	6.2447e+08	1259397150	2.07011e+08	1.71736e+08	8.87439e+07	1.00733e+08	141730517	1.22211e+08	0.001306	0.16822	1.74477	down
V1888	TG O-56:7	2.19186e+08	3.1051e+08	2.53127e+08	3.11997e+08	3.87618e+08	2.35078e+08	3.74291e+08	1201839927	5.28474e+08	5.0713e+08	4.19479e+08	4.37845e+08	0.00648531	2.0198	1.06634	up
V1901	TG 54:1	514932556	6.13287e+08	2.54475e+08	257931481	3.35714e+08	5.83197e+08	1.35447e+08	1.10835e+08	7.38695e+07	8.05271e+07	1.14044e+08	9.93594e+07	0.0007089	0.23992	1.20263	down
V1905	TG 55:5	4.04458e+08	4.00984e+08	2.35569e+08	5.42927e+07	1.23904e+08	4.86271e+08	3.15184e+07	1.7668e+07	1.68763e+08	3.63186e+07	3.52628e+07	3.38283e+07	0.0104056	0.1896	1.01645	down
V1908	TG O-56:5	185036010	2.92577e+08	2.69922e+08	3.39143e+08	3.8846e+08	2.94201e+08	4.39138e+08	1528942649	7.12547e+08	6.75738e+08	5.87995e+08	6.17526e+08	0.00394775	2.5783	1.38868	up
V1969	TG 56:6	1014861653	1074899220	1201334903	1521279543	1214843713	1122820495	2814195761	6888789831	2636129911	2809743698	2801786719	2255373140	0.00394775	2.826	3.01186	up
V1976	d5-TG 56:8	5.33429e+08	5.58336e+08	6.10999e+08	644043070	6.18775e+08	5.92078e+08	1410813853	4150513064	1256334668	1479451463	1474346850	1178914435	0.00394775	3.078	2.23608	up
V1980	TG 56:5	5791408672	7096130231	8750171197	10083293397	7713460630	6994653806	13950387505	9601389670	10509189573	12369233049	13656310268	11886447131	0.0010148	1.5502	4.25939	up
V2011	d5-TG 56:5	4.14125e+08	5.04267e+08	5.50115e+08	5.86223e+08	6.48824e+08	5.25507e+08	5.11409e+07	2.85989e+07	5.50179e+07	5.53637e+07	5.47639e+07	5.67569e+07	0.00394775	0.093415	1.48199	down
V2019	TG 56:2	1100361352	1532952278	8.49909e+08	8.48027e+08	8.98756e+08	1610732981	5.28568e+08	1.87933e+08	1.52042e+08	1.7062e+08	3.95725e+08	2.87843e+08	0.0002553	0.25183	1.9467	down
V2039	TG 56:2	6.15957e+08	7.57421e+08	4.61681e+08	4.74909e+08	4.9585e+08	7.57327e+08	3.14097e+08	1.14481e+08	1.16908e+08	1.31799e+08	2.69077e+08	1.94421e+08	0.00011527	0.32016	1.34674	down
V2044	TG O-58:6	1.00601e+08	1.83288e+08	1.56064e+08	2.08276e+08	2.22728e+08	1.75855e+08	2.50039e+08	8.72654e+08	4.05514e+08	3.51968e+08	2.88078e+08	3.88315e+08	0.00394775	2.4422	1.01683	up
V2065	TG 58:10	1816546674	3146087755	2123627926	2820040514	7387792527	3450789930	7941262653	7163149500	7530708411	10569048876	9198043021	7210762674	0.0104056	2.3916	4.38183	up
V2067	TG 58:10	6.35296e+08	8.07033e+08	1026026031	1255919702	8.71778e+08	1648742922	1730116189	1963273012	1292191163	1715379541	1991611642	1903276368	0.0026413	1.6967	1.63539	up
V2078	TG 58:9	3692634236	5647151595	6044830586	7891897932	10272419949	5532317323	18871169624	17326645751	17113722434	18219455744	19971946976	17233729052	5.6703e-07	2.7823	7.30292	up
V2088	TG 58:8	2813914387	3835446354	5169763611	6598314966	5620947787	3490927436	15197590808	10787601353	10532420859	11575131114	14025464529	12341419479	9.9582e-06	2.7047	5.9324	up
V2091	PG O-48:1	1555168864	1782710512	1588116808	1801686278	2158527093	1465947070	2635010550	2540937251	2333435238	2666381049	3181922043	2661923249	0.00010675	1.5475	2.02248	up
V2096	TG 58:10	8.33825e+08	1139862446	7.80194e+08	9.535e+08	1994451417	1145125350	1519585906	2277230235	2312689015	2657943457	2170936520	1850330109	0.0104056	1.8678	1.93757	up
V2101	TG 58:7	2289253416	2818877606	2062514173	2778355171	2152150722	2460111287	4195308293	4399715333	3150012578	3870273258	5026509016	3321765457	0.00054369	1.6457	2.52005	up
V2102	TG 58:7	8.93968e+08	1095116086	1278519109	1465276393	1125025298	1145453602	2939577188	2500801921	1769119690	2715216076	2823799068	2435066195	2.7544e-05	2.168	2.45371	up
V2106	TG 58:9	8.88873e+08	1075441370	1265031843	1472981759	1660207098	1033200992	2375153669	3005822181	2797435211	2837914158	2958905771	2478346423	2.5344e-06	2.2247	2.64594	up
V2112	TG 58:6	1607471761	1963823839	2503250195	2812186741	2047276114	1938983001	4545144502	3319610786	2879577451	4050745194	5204055941	4031358283	0.00067444	1.8667	2.78312	up
V2119	TG 58:5	2.52111e+08	3.79123e+08	1529940162	1702432481	3.4662e+08	3.84753e+08	2156151792	1724379316	1349479196	1817203514	2342302854	2273596640	0.0104056	2.5382	2.18596	up
V2132	TG 58:6	3.11297e+08	3.56011e+08	4.26153e+08	4.55932e+08	3.63414e+08	3.67573e+08	7.0906e+08	7.12044e+08	5.60583e+08	7.32064e+08	9.34793e+08	6.91224e+08	7.8241e-05	1.9031	1.21775	up
V2139	TG 58:3	4.49072e+08	6.21027e+08	4.72934e+08	5.08059e+08	4.7737e+08	6.90656e+08	4.64556e+08	1.31937e+08	1.11029e+08	1.29968e+08	3.82868e+08	2.93511e+08	0.0030077	0.47027	1.06634	down
V2159	TG 60:13	3.5966e+07	6.42086e+07	1.19176e+08	1.63812e+08	3.1263e+08	1.41009e+08	9.75995e+08	247657777	2.89221e+08	4.38893e+08	7.8087e+08	4.8077e+08	0.0093682	3.8401	1.20036	up
V2166	TG 60:12	3.9594e+08	7.34795e+08	7.46706e+08	9.40633e+08	1236991316	1113137165	3307590461	1721334740	1580447771	2391452968	3804991160	3330603411	0.00098912	3.1223	2.61492	up
V2167	TG 60:12	3.91776e+08	5.47726e+08	4.68659e+08	6.22534e+08	1242097359	6.30392e+08	1958127072	2131413534	1360480302	2390276843	2131895361	1848133356	0.00394775	3.0284	2.41347	up
V2172	TG 60:11	6.38566e+07	7.25764e+07	1.22836e+08	1.65861e+08	9.78748e+07	103673542	3.66965e+08	4.0265e+08	2.70598e+08	318198356	3.58851e+08	3.82218e+08	1.6856e-06	3.3502	1.06365	up
V2173	TG 60:11	175876162	2.92318e+08	2.43699e+08	3.10938e+08	2077586171	5.20269e+08	2348326642	1366374612	1459969941	2461445040	2750500539	2192337031	0.0104056	3.4742	2.38065	up
V2174	TG 60:11	7.16449e+08	1358734470	8.65215e+08	1016375801	2023893245	6.29542e+08	3.23093e+08	2.17196e+08	1.74425e+08	2.54417e+08	3.25818e+08	2.38593e+08	0.0026822	0.232	1.77194	down
V2175	TG 59:4	4.5423e+08	584553249	6.91387e+08	7.44891e+08	7.13447e+08	5.92738e+08	9.17863e+08	9.14079e+08	1004082592	1023188428	9.81705e+08	8.88048e+08	6.4373e-05	1.5151	1.20514	up
V2181	TG 60:10	4.81062e+08	6.34098e+08	7.2336e+08	8.89505e+08	8.35924e+08	5.82388e+08	2246951506	2087398230	1556029457	1859747555	2635560763	2191421568	5.8832e-06	3.0333	2.50297	up
V2182	TG 59:3	389625575	4.78643e+08	761035606	8.26664e+08	6.25251e+08	5.08054e+08	8.8935e+08	7.13615e+08	9.66418e+08	9.7206e+08	1019436934	1046753764	0.0027649	1.5623	1.16691	up
V2183	TG 60:12	1.7841e+08	2.80535e+08	284432348	3.35933e+08	3.54512e+08	3.61213e+08	7.56855e+08	3.73342e+08	4.68102e+08	5.7638e+08	8.8859e+08	7.94268e+08	0.0027345	2.149	1.10055	up
V2184	TG 60:12	1.6135e+08	1.48606e+08	2.13735e+08	1.6337e+08	386255902	2.24763e+08	6.2181e+08	8.6014e+08	5.32925e+08	8.07357e+08	764942794	5.82281e+08	0.00394775	3.212	1.46927	up
V2188	TG 60:9	4.86455e+08	6.38585e+08	6.03923e+08	7.73358e+08	9.11168e+08	5.67175e+08	1807027607	1455149467	1094937362	1383288187	1916141982	1434765312	0.00010291	2.2839	1.92431	up
V2189	TG 60:9	1.41031e+08	7.29913e+07	2.25499e+08	2.43187e+08	2.57639e+08	1.86995e+08	5.42139e+08	5.50064e+08	4.34007e+08	4.52994e+08	6.386e+08	5.34708e+08	1.0584e-05	2.7964	1.23333	up
V2191	TG 60:9	2.14672e+08	249817176	375672355	4.70566e+08	2.02612e+08	2.37915e+08	5.24269e+08	7.73518e+08	5.76953e+08	578301409	7.39948e+08	6.5035e+08	0.0001621	2.1946	1.23844	up
V2192	TG 60:9	8.44068e+07	1.10621e+08	1.14758e+08	1.60932e+08	1.72019e+08	1.25429e+08	5.58179e+08	3.42793e+08	2.57624e+08	1554464801	2180007800	4.55566e+08	0.039187	6.9629	1.52395	up
V2201	TG 60:8	1.00447e+08	2.34561e+08	2.34061e+08	3.71635e+08	3.58407e+08	3.26298e+08	5.67601e+08	6.34805e+08	4.96701e+08	5.8763e+08	7.42311e+08	4.74366e+08	0.00029439	2.1554	1.16039	up
V2203	TG 60:8	5.34099e+08	5.61777e+08	5.99487e+08	6.94846e+08	8.467e+08	693640119	1882109565	1092227017	9.04e+08	1090437922	1799597989	1152130687	0.0034774	2.0151	1.58643	up
V2208	TG 60:10	1.15704e+08	1.23458e+08	1.65668e+08	1.72168e+08	1.43508e+08	120348936	3.55542e+08	5.10481e+08	3.29143e+08	4.07962e+08	4.72531e+08	4.29309e+08	2.9876e-06	2.9791	1.13162	up
V2213	TG 60:7	3.10081e+08	3.72241e+08	5.13224e+08	5.58173e+08	4.78147e+08	3.90005e+08	1040432350	7.01628e+08	6.26951e+08	7.05265e+08	1181812997	8.3017e+08	0.0017705	1.9399	1.29485	up
V2264	TG 62:14	2.34793e+08	4.65915e+08	2.66244e+08	3.4553e+08	1760028531	5.10675e+08	2720950303	2259629959	1505831647	2897652719	2674805988	1968533757	0.00648531	3.9148	2.69935	up
V2269	TG 62:13	2.35386e+08	4.38071e+08	4.33153e+08	5.96842e+08	1232022747	4.33269e+08	4029025769	2604415118	2161493109	3298040617	4259378024	3088329078	0.00394775	5.7709	3.40263	up
V2274	TG 62:12	4.27689e+07	5.27153e+07	9.85827e+07	1.03869e+08	9.03732e+07	8.83772e+07	5.47437e+08	4.16103e+08	3.24986e+08	5.19515e+08	6.97951e+08	5.66575e+08	1.0928e-05	6.4457	1.35897	up
V2275	TG 62:12	1.69953e+08	235256610	2.34652e+08	3.06786e+08	3.44327e+08	1.80684e+08	7.97851e+08	8.04451e+08	4.43517e+08	6.77672e+08	8.85837e+08	6.77878e+08	4.9254e-05	2.9132	1.44701	up
V2277	TG 62:14	136883399	284249479	1.39181e+08	2.04912e+08	9.08738e+08	251606591	1002142617	1083263253	8.43208e+08	1392090523	1269895884	8.95377e+08	0.0104056	3.3683	1.77275	up
V2279	TG 62:11	7.93744e+07	3.0027e+07	1.06297e+08	1.43102e+08	8.63372e+07	7.67452e+07	369484513	526739108	2.43687e+08	3.1997e+08	4.29826e+08	3.72571e+08	4.27e-05	4.3348	1.14867	up
V2281	TG 62:13	105351470	1.52195e+08	1.54383e+08	1.94235e+08	3.69826e+08	1.34289e+08	988353975	8.59803e+08	6.98002e+08	8.97637e+08	1151349183	832645960	0.00394775	4.8887	1.79839	up
V2404	FA 17:0	2170846431	1763204382	1685698667	1996356468	2811497521	1139998681	9.94267e+08	1183941959	1104914025	1013359957	1021210664	9.57413e+08	0.0032829	0.54247	1.74194	down
V2407	FA 18:4	1471573954	1454447609	4.20564e+08	6.0538e+08	1149325445	7.16953e+08	4.3469e+08	3.42085e+08	5.14913e+08	609300010	6.75199e+08	208809583	0.028188	0.47867	1.27227	down
V2413	FA 18:1	3676383441	3860104213	4809001683	6784731762	6519153372	1863202319	7343832822	6231043495	7191758139	6949794623	9196294096	6362709925	0.013478	1.5729	3.49069	up
V2424	FA 19:0	6.99873e+08	5.86149e+08	452671154	5.36013e+08	1484454947	3.51543e+08	2.23794e+08	1.97141e+08	2.29307e+08	2.41838e+08	3.54527e+08	2.27181e+08	0.00648531	0.35852	1.17718	down
V2427	FA 20:4	8782508841	8097984056	8701949658	11381161859	10585083839	6007651794	20037481015	13079731708	10423874589	11982517842	14120514270	11438093768	0.017053	1.514	4.21969	up
V2431	FA 20:2	6114741256	5550224973	6380436507	7894883794	9052059551	2914201397	11079869277	9048799029	9309903538	9723582801	17744948597	9467566663	0.00648531	1.751	4.40574	up
V2432	FA 20:2	9.06678e+08	1009049809	1250778156	1373926300	1299245306	4.76244e+08	2319486908	1301808675	1907529669	1676928724	3431596430	2120276628	0.0083985	2.0199	2.05289	up
V2435	FA 20:0	2485429331	2089809231	7.32757e+08	6.93267e+08	2208003566	1135121790	6.00557e+08	2.87162e+08	3.99276e+08	3.15421e+08	541074792	3.25123e+08	0.0059464	0.26418	2.0466	down
V2451	FA 22:5	1140290839	9.66352e+08	1118840374	1718515302	1200725872	5.31437e+08	3300621776	2423946618	1288867738	2670072866	3635206095	2100399999	0.0032099	2.3096	2.4549	up
V2453	FA 22:4	5470761035	4157343389	5079151045	6231999082	5421618533	2122204149	11970115099	13551048237	8216627005	12796069698	15405225628	8084998824	0.00042961	2.4584	5.50635	up
V2455	FA 22:3	2.61394e+08	2.33859e+08	8.46996e+08	1005089393	3.3605e+08	9.75452e+07	2169895825	1191110688	1597655664	1858371834	3493682174	2253064691	0.0010007	4.5178	2.56237	up
V2462	FA 22:1	2677751580	2228621375	1306266940	1389224389	2545169438	1097230802	1646689759	6.33738e+08	8.20269e+08	7.38237e+08	1708265008	9.32632e+08	0.042518	0.57628	1.59608	down
V2465	FA 22:0	1567999141	1120490969	3.4242e+08	276205307	9.34571e+08	6.0778e+08	2.7023e+08	2.18919e+08	2.79891e+08	2.08771e+08	2.76387e+08	1.90271e+08	0.019025	0.29786	1.41065	down
V2476	FA 24:5	1.69467e+08	1.95381e+08	4.70488e+08	566964618	295740509	8.76858e+07	1570745748	5.35993e+08	9.9405e+08	1540899513	3600853029	1439025048	0.012947	5.4216	2.15531	up
V2479	FA 24:4	2.51083e+08	1.84899e+08	5.96075e+08	7.24696e+08	4.39555e+08	1.07683e+08	1041025867	1278923468	8.27548e+08	1228395452	2316123012	8.32378e+08	0.00394775	3.2658	1.8732	up
V2483	FA 24:1	1300927621	1011999165	9.10014e+08	984655264	1281349513	6.25174e+08	1825416171	1373942576	1262765754	1485712092	1881229456	1343119227	0.0063656	1.5002	1.38707	up
V2487	FA 24:0	1191413438	7.3369e+08	3.09552e+08	3.10219e+08	6.0199e+08	4.874e+08	3.41385e+08	2.96388e+08	2.39145e+08	2.96739e+08	3.25126e+08	1.96641e+08	0.040089	0.46651	1.01675	down
V2512	LPE 16:0	3202797145	3244737105	3333850356	3242083031	4406364559	2820012186	1971594602	1071785064	1754057968	2220098222	2778592465	1638854591	0.00394775	0.56469	2.54764	down
V2526	LPE 18:2	1288202953	1260346033	1082647916	1138554711	1671789570	1104763253	6.35665e+08	5.38412e+08	6.43e+08	6.97943e+08	8.33783e+08	537311805	0.00011891	0.51497	1.61054	down
V2546	LPE 20:4	3338517934	3173147259	3572946267	3931210448	3601354932	2771627276	6012183375	4959365828	5090321071	5627417717	5993461320	4971621236	1.4184e-05	1.6016	3.05025	up
V2581	Cer 34:1	6.83954e+08	5.05481e+08	3.42621e+08	4.16424e+08	4.17617e+08	2.58982e+08	8.18078e+08	8.57306e+08	8.0769e+08	8.33151e+08	638723158	7.85988e+08	0.00648531	1.806	1.20859	up
V2626	Cer 34:1	2009997555	1546301997	1162203049	1401956524	1127724891	8.64958e+08	2651937076	2573886769	2485867810	2343383719	1813376705	2153720705	0.00076384	1.7283	2.00381	up
V2632	SL 33:0+O	9.2629e+08	8.78863e+08	5.53395e+08	1071638901	5.84523e+08	4.51854e+08	4.90255e+08	4.91664e+08	4.61636e+08	3.55698e+08	3.722e+08	2.34669e+08	0.010313	0.5387	1.01994	down
V2654	LPC 21:4	2.97178e+08	2.94717e+08	4.1099e+08	4.50176e+08	272744795	2.28221e+08	820938973	7.29491e+08	6.92748e+08	6.70109e+08	5.6624e+08	6.39024e+08	2.6825e-05	2.1077	1.27473	up
V2739	Cer 40:2	1033459237	1021950359	3.54555e+08	3.83859e+08	7.44657e+08	7.59742e+08	2.20272e+08	1.49184e+08	1.52656e+08	1.57391e+08	1.63851e+08	1.36985e+08	0.00394775	0.22808	1.52974	down
V2741	Cer 40:1	6.85366e+08	680215240	1.84533e+08	1.83337e+08	4.03341e+08	5.53407e+08	6.56611e+07	8.49899e+07	1.17763e+08	4.94465e+07	5.48955e+07	1.16201e+08	0.0030277	0.18175	1.26205	down
V2742	Cer 39:1	5.98442e+08	5.29115e+08	1.58703e+08	1.6492e+08	3.57734e+08	3.51508e+08	4.53803e+07	5.52906e+07	7.8731e+07	3.72645e+07	4.05755e+07	7.17203e+07	0.0021144	0.15227	1.1289	down
V2752	Cer 40:2	2698494217	2579405178	8.98601e+08	9.81598e+08	2169759994	1814190084	553386348	3.48998e+08	3.60906e+08	3.63858e+08	3.87925e+08	3.09409e+08	0.00394775	0.20862	2.46806	down
V2756	Cer 41:2	4.1329e+08	3.767e+08	2.83065e+08	3.57538e+08	4.46371e+08	3.08295e+08	6.05159e+07	9.10891e+07	1.01607e+08	8.83775e+07	5.45318e+07	5.27765e+07	7.4839e-07	0.20542	1.12473	down
V2782	Cer 42:2	9.29354e+08	1009879813	6.93063e+08	7.87836e+08	767290550	7.69979e+08	2.41235e+08	1.93732e+08	172667218	1.85026e+08	1.99035e+08	1.84217e+08	1.6241e-07	0.2372	1.69548	down
V2784	Cer 41:2	1430767272	1209190447	9.28306e+08	1049676762	1327702578	9.4382e+08	2.19073e+08	2.51984e+08	2.8386e+08	2.29687e+08	2.32281e+08	2.50112e+08	9.3336e-07	0.21293	2.00167	down
V2786	Cer 42:1	1011947468	9.37003e+08	4.53206e+08	5.14287e+08	6.96824e+08	7.1751e+08	1.00926e+08	1.98322e+08	3.02009e+08	1.21882e+08	1.19024e+08	2.76171e+08	0.00026047	0.25823	1.53796	down
V2799	Cer 42:5	1.86275e+06	2.18561e+06	2.91955e+07	3.52743e+07	6.21555e+06	1.16184e+06	2.19914e+08	2.6511e+08	216831990	2.91502e+08	2.76641e+08	1.93155e+08	0.00394775	19.279	1.03518	up
V2812	Cer 43:1	7.51496e+08	7.01086e+08	3.74643e+08	3.75938e+08	4.95313e+08	6.87685e+08	1.14817e+08	1.93536e+08	2.62753e+08	1.01342e+08	1.31317e+08	2.79193e+08	0.00051564	0.31982	1.32543	down
V2815	OAHFA 47:5	8.30864e+08	750635488	5.1502e+08	714842428	6.88527e+08	7.00954e+08	2.29249e+08	1.96318e+08	2.27904e+08	2.16294e+08	240492046	190647956	5.7317e-07	0.30968	1.48062	down
V2822	PE 34:2	1879301153	1557859474	6.93398e+08	7.816e+08	1265473716	1694287890	4.17501e+08	3.8946e+08	3.62703e+08	3.73732e+08	3.42722e+08	3.09108e+08	0.00080739	0.27887	2.0362	down
V2879	PE 36:3	1039769699	1072197115	7.83743e+08	9.66932e+08	1061340094	1063889261	5.67795e+08	4.82609e+08	5.29479e+08	5.23018e+08	500092433	4.38256e+08	0.00394775	0.5079	1.48861	down
V2880	PE 36:2	7.44443e+08	7.41749e+08	439388006	520863071	5.49114e+08	7.12479e+08	2.4511e+08	2.47537e+08	2.50801e+08	2.41897e+08	2.44842e+08	271784495	0.00394775	0.40506	1.29738	down
V2892	PG 34:2	1503961545	1373777481	1071404659	1096141988	9.87309e+08	1420436572	1.83131e+08	5.1888e+08	726255149	7.59776e+08	9.15748e+08	6.71761e+08	0.0011294	0.50658	1.60814	down
V2930	PE 38:9	8.84375e+08	7.9712e+08	7.27895e+08	7.56649e+08	9.59279e+08	8.10232e+08	3.16904e+08	173373239	3.14748e+08	3.6948e+08	2.96098e+08	2.78755e+08	2.7553e-07	0.35444	1.56308	down
V2944	PE 38:5	6.71725e+08	4.42842e+08	2.52768e+08	2.23194e+08	2.32305e+08	4.72241e+08	3.4375e+07	3.11459e+07	3.11125e+07	3.01834e+07	2.67356e+07	1.90902e+07	0.00068159	0.075223	1.24856	down
V2945	PE 38:5	2087507065	2310801716	2338124628	2819065600	2821121737	1749232539	5216270656	3857220778	3926670269	4309371792	3983146607	3696305363	7.8698e-05	1.769	2.83674	up
V2975	LBPA 36:2	307520772	3.22584e+08	1.33685e+08	1022893919	7.80314e+07	7.24173e+07	7.59706e+08	7.42648e+08	8.55953e+08	575783492	1048274825	7.78119e+08	0.037373	2.4575	1.29748	up
V3051	LBPA 38:5	3.31386e+07	1.86342e+08	1111858536	5.49699e+08	4.27851e+08	3.87295e+08	7.24196e+08	1415293918	1224389763	1091309654	1544999466	1727221841	0.0025997	2.8661	1.77888	up
V3125	LBPA 40:7	2099065199	1631143492	1014609789	2005216932	3232363079	4.42467e+08	6854293373	4426158239	3286124026	4314950712	2998742524	3797635753	0.0041063	2.4631	3.12144	up
V3132	LBPA 40:6	1.51957e+08	3.0854e+08	7.14873e+08	5.36365e+08	6.04368e+08	4.24349e+08	6.13336e+08	1114913487	8.8002e+08	6.79899e+08	1086426030	8.93056e+08	0.0051744	1.9222	1.27799	up
V3133	LBPA 40:6	1.31015e+07	5.60602e+07	1.74502e+08	1.94572e+08	6.76754e+07	5.89517e+07	2.99604e+08	3.33576e+08	3.22772e+08	2.88763e+08	3.72459e+08	3.2674e+08	3.0148e-05	3.4414	1.01629	up
V3200	PC 37:3	4.53581e+08	1213306508	3.90608e+08	4.6564e+08	1229812550	2.65631e+08	1637437040	1204461467	1354545835	1323564591	4.82644e+08	1365422182	0.0249747	1.8335	1.25613	up
V3213	PG 42:8	2.04792e+08	2.17443e+08	4.01109e+08	4.45487e+08	3.46615e+08	2.34187e+08	7.81448e+08	1937830324	1063080404	1136903606	9.63637e+08	1205904437	0.00040771	3.8325	1.99688	up
V3265	PS 42:5	3.68734e+08	3.81939e+08	3.75428e+08	4.32249e+08	4.03846e+08	2.78554e+08	7.16077e+08	6.61646e+08	6.61982e+08	6.56929e+08	5.92737e+08	5.83738e+08	3.1078e-06	1.7285	1.1196	up
V3267	LBPA 44:12	4.73757e+08	5.45978e+08	1.53753e+08	6.04868e+08	1356191594	4.10855e+08	1936016262	2113989288	1444525698	1584665965	1297088064	1558396277	0.00045552	2.8021	2.1316	up
V3270	PC 39:5	2.12162e+08	1.88032e+08	4.04847e+08	4.48812e+08	4.02421e+08	1.39989e+08	8.80282e+08	8.01441e+08	1034270037	8.02455e+08	6.9865e+08	7.1079e+08	3.672e-05	2.7434	1.52641	up
V3274	PG 44:11	1.11001e+07	4.52143e+07	1.13491e+08	1.25359e+08	7.23801e+07	4.08654e+07	4.83735e+08	3.31886e+08	3.41144e+08	5.33831e+08	6.68704e+08	383484342	4.2702e-05	6.7158	1.29409	up
V3279	PC 39:4	6.05848e+08	5.57658e+08	563299019	6.38308e+08	5.88893e+08	5.3639e+08	9.98088e+08	1136436988	1058899416	1102715869	839575800	9.79004e+08	2.5092e-06	1.7519	1.42805	up
V3340	PC 41:7	2.86453e+08	2.5736e+08	4.05705e+08	4.51599e+08	3.79922e+08	2.14201e+08	8.47252e+08	8.46507e+08	7.49612e+08	734603237	7.08344e+08	678333998	4.3662e-06	2.2878	1.42025	up

## Sheet: MT vs MP
Identification number	Lipid name	MP						MT						Paired comparison
		MP1	MP2	MP3	MP4	MP5	MP6	MT1	MT2	MT3	MT4	MT5	MT6	MT/MP p value	MT/MP FC	MT/MP VIP	MT/MP regulation
V20	CE 0:0	7.63128e+08	8.60587e+08	6.14709e+08	614593426	5.39457e+08	4.06963e+08	2.90306e+08	4.40347e+08	2.36969e+08	1.97371e+08	5.66042e+07	2.2473e+08	0.00082326	0.38067	1.39741	down
V34	CAR 16:0	3.76512e+08	4.25813e+08	4.44144e+08	4.91255e+08	5.20676e+08	4.22966e+08	1742624440	4227530021	1361222991	1969629621	1566355804	1360774161	0.00394775	4.5604	2.65246	up
V46	CAR 18:0	2.6054e+08	4.67943e+08	2.69616e+08	3.48987e+08	3.00687e+08	3.15296e+08	1103571921	3347361046	862187453	9.31565e+08	8.20741e+08	623210557	0.00394775	3.9166	2.00687	up
V63	CAR 20:4	2.19188e+08	4.77108e+08	2.77596e+08	336910383	1.91217e+08	2.83305e+08	6.27412e+08	1055906744	6.21747e+08	641210257	6.87873e+08	5.7753e+08	0.00394775	2.3591	1.38047	up
V122	LPC O-16:0	3.62272e+08	2.56575e+08	472629130	4.98093e+08	7.65145e+08	3.50988e+08	3.9176e+07	4.13322e+07	4.83385e+07	4.7597e+07	2.88633e+07	2.94389e+07	0.00020234	0.08676	1.36226	down
V128	LPC 16:1	3177101074	1204436039	2656819634	2511327290	4032737310	2271708749	1118028677	1094627938	1675491087	1166951877	818541419	1692650368	0.0071705	0.47724	2.3212	down
V140	PE O-20:3	1110943035	7.02617e+08	1180528348	1060510791	1238718587	9.13461e+08	1385626103	1688896046	1639739022	1767225185	2626551939	1361860217	0.0060816	1.6868	1.62765	up
V143	LPC O-18:3	9.29455e+08	7.25154e+08	1199518184	1266907986	1556951051	7.73319e+08	1.90652e+08	1.21908e+08	1.33895e+08	1.26845e+08	1.43424e+08	1.32828e+08	0.00394775	0.13169	2.10137	down
V150	LPC 17:1	3.78396e+08	221501478	3.9707e+08	4.14499e+08	5.60531e+08	3.69793e+08	1.40632e+08	1.72695e+08	1.78907e+08	1.14894e+08	7.47839e+07	1.87874e+08	0.00043609	0.37142	1.03319	down
V154	LPC O-18:1	4.16939e+08	3.20673e+08	6.54652e+08	5.575e+08	1130425476	4.74814e+08	9.63391e+07	103584910	1.4308e+08	1.02497e+08	6.33575e+07	9.69269e+07	0.0019091	0.1704	1.42868	down
V159	LPC 17:0	1657610445	1842229319	2100455331	2389595620	3246003791	1966055228	1249239090	1341710259	1201709385	1037081537	6.51136e+08	1038281700	0.0013202	0.4938	2.11281	down
V173	LPC 18:2	33090965882	28051984026	28833972816	28258000574	27860438812	23712145614	14554209960	23653318554	16269494604	13817380409	10967344271	14010779426	0.00014209	0.54928	7.80176	down
V174	LPC 18:2	962305807	1.73083e+08	2.19231e+08	1001794775	7.73401e+08	5.91488e+08	3.18462e+07	2.63827e+07	2.13542e+07	1.22334e+07	3.36668e+07	1.1027e+07	0.0022686	0.036683	1.54722	down
V176	LPC 18:1	57073373163	44829577753	52588539025	55240789803	64478496899	46219010482	30742029881	32998425405	32104904098	28075415343	22906397123	34669770882	5.1432e-05	0.56642	10.3834	down
V178	LPC 18:1	678526522	4.34915e+08	6.16807e+08	7.65079e+08	1315480759	6.45079e+08	3.7985e+08	3.63767e+08	4.24033e+08	2.86451e+08	2.09065e+08	3.13498e+08	0.0085792	0.44361	1.2301	down
V180	VAE 16:1	2.19932e+08	4.29363e+08	3.69294e+08	1.57752e+08	9.41551e+07	3.55944e+08	1.83316e+07	3.48068e+06	9.15575e+06	2.69437e+07	0	6.65868e+06	0.00075174	0.0397	1.02449	down
V191	LPC O-20:4	3.01797e+08	2.11732e+08	4.49914e+08	4.8845e+08	1338857330	4.25981e+08	8.32082e+07	6.46554e+07	1.01176e+08	7.53402e+07	5.18206e+07	8.21446e+07	0.00394775	0.14249	1.27428	down
V193	LPC 17:0	3682922831	4576844866	4642506667	5342819605	6059737367	3584844837	2463401333	3323524100	2334610495	2233708378	1638890876	1780553678	0.00044957	0.4939	3.16941	down
V199	LPC 19:1	3.15417e+08	2.46934e+08	3.7613e+08	3.65604e+08	668130026	365783653	1.47692e+08	122798321	1.42936e+08	9.67204e+07	7.57076e+07	1.73649e+08	0.00394775	0.32485	1.05032	down
V211	LPC 18:2	3.37482e+08	2.95254e+08	3.15341e+08	3.8314e+08	6.36524e+08	3.19346e+08	1.28992e+08	1.89215e+08	1.23213e+08	1.31176e+08	9.32385e+07	1.37881e+08	0.00394775	0.35142	1.01136	down
V212	LPC 18:2	1436825954	9.21233e+08	8.34456e+08	1516828482	1287716073	723260754	4.12356e+08	5.87249e+08	3.17749e+08	3.76586e+08	2.33993e+08	234114486	0.00043084	0.32172	1.84683	down
V213	LPC 20:5	2723256545	2783136713	2843191118	2983999033	2643623620	1889505146	7.08963e+08	7.23001e+08	884375511	4.66679e+08	3.62624e+08	5.07281e+08	0.00394775	0.23023	3.17824	down
V216	LPC 18:1	1210376093	9.02492e+08	1109355557	1333392019	2033970888	1034080581	6.87699e+08	7.10103e+08	8.18098e+08	6.35822e+08	460538767	7.03023e+08	0.0055761	0.52669	1.51184	down
V219	LPC 20:3	15290366577	7594432377	13003136720	14225940023	15726274886	12429035960	7081606360	4728447490	9006971016	5766451560	6304747786	8296638491	0.0011355	0.5262	5.23779	down
V223	LPC 20:2	3216451459	2445332459	2528509643	3162433524	5125526393	2281958606	1094210563	1279804115	1040048180	9.46996e+08	8.21441e+08	1167706655	0.00077203	0.33849	2.97952	down
V224	Cer 36:1	1.76472e+08	3.02428e+08	2.86888e+08	1.99171e+08	1.48871e+08	2.17631e+08	4.8508e+08	9.7018e+08	4.56247e+08	6.35798e+08	5.43871e+08	4.7413e+08	0.00394775	2.6777	1.30954	up
V226	LPC 20:1	6614599359	2320491116	4067837176	4582228807	11503849579	4115582596	1983563306	1519405163	2536605280	1852284427	2096338294	3141150836	0.031579	0.39541	3.38523	down
V236	DG O-31:3	7.57086e+08	7.5864e+08	1.95379e+08	2.01211e+08	1.07241e+08	1073883867	7.53249e+07	1.46851e+07	2.02834e+07	7.51984e+07	415217	2.26935e+07	0.014789	0.067433	1.21607	down
V237	DG O-33:6	7.3789e+08	1453492801	468787762	3.99708e+08	251351824	8.87868e+08	9.90736e+07	2.13412e+07	1.93905e+07	7.68022e+07	2.85349e+06	2.5521e+07	0.0041729	0.058342	1.59445	down
V240	LPC 19:1	2.79366e+08	1.47116e+08	3.41201e+08	3.86841e+08	844286042	3.60616e+08	1.35245e+08	3.34381e+07	1.11784e+08	3.0515e+07	2.1427e+07	157999359	0.010867	0.20785	1.09437	down
V250	LPC 20:5	6.68765e+08	7.55554e+08	8.24402e+08	8.73353e+08	8.32921e+08	5.75627e+08	2.19599e+08	1.82691e+08	2.37205e+08	1.3618e+08	1.12719e+08	1.40659e+08	4.2653e-07	0.22713	1.69027	down
V252	LPC 20:4	7.858e+08	1118289989	3365502669	9.08624e+08	5.48501e+08	2651575683	3390367594	3114421336	3217750177	3703702543	3292833451	2935076561	0.0053871	2.0957	2.66504	up
V253	LPC 20:4	1499441304	1045707461	9.23973e+08	1777161364	1199066775	7.50009e+08	6.08815e+08	6.22168e+08	4.68564e+08	7.04971e+08	4.0915e+08	3.51249e+08	0.0022833	0.43986	1.67672	down
V258	Cer 36:1	1.25552e+08	1.91331e+08	1.90454e+08	1.5094e+08	9.47483e+07	1.55583e+08	2.91065e+08	6.36755e+08	2.99433e+08	4.19616e+08	3.40143e+08	3.01322e+08	0.00394775	2.5185	1.02138	up
V262	LPC 22:6	24972185945	28699446115	25163689467	25061601623	26813332983	19770625465	17094507608	18199906413	13491639354	15143651518	8648335475	15857081266	0.00022431	0.58768	7.01248	down
V265	LPC 22:5	5616929780	5445457603	4794884510	6075906292	8345666316	3673337180	2150376315	2779108449	1930677536	2076231160	2042470662	1881815997	0.00394775	0.37879	3.97517	down
V267	LPC 22:5	1519049603	1531515979	1925654897	2196567270	2659474888	1884314223	6.48116e+08	1113025777	9.68545e+08	9.11763e+08	616001266	1814055442	0.0037599	0.5182	1.94178	down
V271	LPC 20:1	15218156492	6137571193	8803858414	9637338905	20239250575	8088760447	4439362405	3808589719	5901886309	4379931776	5139096646	6307025088	0.016287	0.44001	4.82305	down
V316	DG 32:1	1.09925e+08	2.31552e+07	1.68204e+08	1.82226e+08	2.86318e+08	1.763e+08	4.4084e+08	1.18457e+08	497881810	7.07774e+08	1394719189	6.71408e+08	0.021967	4.0492	1.35635	up
V325	TG O-32:0	3.3375e+08	2.3558e+08	4.27595e+08	4.82699e+08	5.2914e+08	4.20671e+08	9.08002e+08	4.16494e+08	8.70127e+08	1261056393	1702939487	1354677190	0.0047612	2.681	1.67058	up
V344	DG 33:4	645633973	611060197	1.26061e+08	1.55827e+08	8.59891e+07	7.3197e+08	6.39406e+07	1.43908e+07	1.39768e+07	5.62314e+07	268351	1.65096e+07	0.013873	0.070153	1.08624	down
V357	DG O-36:4	4.43376e+08	6.64073e+08	6.5523e+08	631909770	6.92452e+08	6.73026e+08	1.1036e+08	1.13399e+08	1.41816e+08	1.40715e+08	1.19367e+08	1.15342e+08	0.00394775	0.19707	1.55203	down
V371	DG 34:2	3475540331	1312323520	3049406911	3846803850	4412659140	2233053007	4831896989	2768434769	5157617471	6400642400	7611714564	4317276526	0.027619	1.696	2.78211	up
V376	PG O-25:0	6.01144e+08	797394801	2.92554e+08	1.19291e+08	1.32447e+08	776433800	7.19645e+07	1.08266e+07	1.77967e+07	7.39803e+07	0	1.77177e+07	0.0080874	0.070712	1.20173	down
V378	DG 34:1	1902916534	7.51359e+08	2189091297	2004740327	2654150622	2151655185	4342643456	2406747965	4764670435	5770219306	7511352143	5798392564	0.0017505	2.6252	3.70768	up
V388	DG 34:2	2771357996	4.23545e+08	909843244	3592381183	4362513399	2413527101	5552560414	3002260765	4927380298	6910238695	9545906259	4311600722	0.014695	2.3664	3.56923	up
V389	DG 36:5	2335661378	1216024924	2583779197	3034203950	3795578538	2016826963	4861636573	2550901418	4508105534	6313541843	8189116199	3784059625	0.016763	2.0162	3.12739	up
V394	DG 34:1	4287090507	2337523035	5747953375	5952520672	7405430956	6297076612	11801162908	6135462944	11794701281	12590550503	16057165121	14480680833	0.001426	2.2749	5.54793	up
V397	DG 36:4	7.27419e+07	2.7193e+07	6.22094e+07	6.34284e+07	1.36463e+08	2.4151e+08	4.3306e+08	6.71734e+07	4.79618e+08	6.57301e+08	7.85823e+08	6.69789e+08	0.0034449	5.1243	1.34631	up
V408	LPC O-27:8	7.45087e+08	7.55737e+08	3147083451	1001280103	662135160	1081020981	1.74508e+06	1.19148e+06	1.2932e+06	4.6439e+06	971298	1.34287e+06	0.00394775	0.0015134	2.1378	down
V458	DG 36:4	1361062881	1049753146	8.71573e+08	1431922993	1210018320	1078438782	2275168925	1145342999	1623000105	2685327969	2831266083	1091273866	0.037479	1.6638	1.58649	up
V471	DG 36:2	11119256614	5419912053	12124428690	10091048224	14001102567	9611987421	12459746014	13544471733	18732518685	16715820961	22696645016	15469205832	0.0091611	1.5973	4.92627	up
V473	DG 36:2	1297367452	7.79939e+08	1386302143	1887806386	1798402220	1869325916	1563429216	1384117620	2915151804	2967981186	2542697533	2239340106	0.04133	1.5093	1.80353	up
V475	DG 36:4	4.86107e+08	3.04035e+08	3.60683e+08	7.23041e+08	6.40357e+08	4.3807e+08	1556975536	6.51897e+08	1028012108	1809896041	1794934842	6.07232e+08	0.0096458	2.5231	1.69235	up
V479	DG 36:3	575453142	1.46369e+08	2.98816e+08	3.22394e+08	902547334	241339985	8.35391e+08	2.19064e+08	8.58919e+08	1165070020	1473914476	1006654491	0.031758	2.2353	1.32724	up
V481	DG 38:6	7.65986e+07	6.94009e+07	5.52182e+07	6.99475e+07	9.45538e+07	1.06152e+08	1181733475	6.54674e+08	1213163595	1641549317	1510370205	1071227140	1.2154e-05	15.413	2.31103	up
V482	LPC O-27:8	4.62309e+08	5.26081e+08	2266860662	8.13222e+08	5.90282e+08	8.36605e+08	1.18998e+06	92809.5	466520	3.12976e+06	964528	728300	0.00394775	0.0011959	1.86634	down
V485	DG 36:2	9410007313	6117601443	11812938374	10958450761	13520824176	10904842302	14364634821	12761604077	17513891208	16725577798	20808579524	16622016700	0.0027675	1.5751	5.19098	up
V488	DG 38:5	2.01188e+08	1.18306e+08	3.11723e+08	316100987	3.89988e+08	231361041	5.47282e+08	3.59389e+08	1262426565	6.49717e+08	1696596032	1258333056	0.0087606	3.6807	1.63303	up
V497	TG O-38:4	2.78334e+08	1.03443e+08	2.38132e+08	3.01409e+08	5.29037e+08	256656726	6.36503e+08	325018930	7.1601e+08	8.9102e+08	8.25163e+08	5.48525e+08	0.0041343	2.3094	1.25212	up
V525	DG 38:7	1.44543e+08	4.34234e+07	8.33978e+07	1.13381e+08	1.6225e+08	8.08532e+07	3.37203e+08	212658891	4.37353e+08	5.41847e+08	5.56189e+08	274733215	0.00076303	3.7588	1.11566	up
V533	DG 38:6	1544609199	1372690443	9.69287e+08	1329816503	1738160515	2005895332	19295810561	11580973794	20695880046	27025227537	24890849208	17715684756	8.1172e-06	13.527	9.41712	up
V535	TG O-38:6	112453208	1.1673e+08	9.7152e+07	1.34263e+08	1.54781e+08	1.90946e+08	2116330516	6.86947e+08	1240554507	2770954742	2161617086	2156374535	0.00022961	13.807	2.74143	up
V536	DG 38:6	4.18349e+07	3.61089e+07	1.26382e+07	3.00237e+07	3.20239e+07	3.04279e+07	7.02154e+08	1.38193e+08	2.76477e+08	7.31888e+08	3.92553e+08	6.84433e+08	0.0012909	15.982	1.3497	up
V540	TG O-38:5	6.24093e+07	5.17928e+07	2.87076e+07	7.55348e+07	6.25931e+07	3.29768e+07	6.00976e+08	4.44746e+08	6.90185e+08	8.42091e+08	1252981705	3.31239e+08	0.00073758	13.255	1.65153	up
V541	DG 38:5	1.65881e+08	1.66277e+08	1.81245e+08	2.08496e+08	278003803	6.81221e+08	1134934214	633370068	1277230952	2003024721	1477683839	2232161185	0.00648531	5.2099	2.26154	up
V549	DG 38:4	2837301912	1232377391	2511732277	3105749152	5259058444	2574012275	5177074454	2966826545	6027459371	7270686237	7084323855	4525083713	0.012898	1.8865	3.2173	up
V552	PEt 31:0	6.51601e+08	5.57135e+08	4.53042e+08	6.10761e+08	7.08542e+08	8.51527e+08	8903837627	5290436591	7973132534	11697065149	10682984460	7077581258	8.722e-06	13.47	6.13881	up
V555	DG 38:5	5.11365e+08	8.10813e+08	3.16196e+08	3.11535e+08	1.5019e+08	8.70996e+08	7.42746e+07	1.03779e+07	2.0216e+07	101712698	2939378	3.30554e+07	0.0035859	0.081645	1.26732	down
V556	DG 38:5	415800949	1.32989e+08	4.50467e+08	5.83405e+08	440277820	5.27327e+08	1130373364	6.00499e+08	1223393575	1824923368	1318046781	2120782339	0.0020303	3.2224	1.96434	up
V558	TG O-40:8	3.22492e+08	1.91223e+08	2.9141e+08	4.49932e+08	6.09933e+08	3.37584e+08	1071056866	6.09702e+08	940613976	1290618151	1268507594	753764261	0.00062032	2.6942	1.6584	up
V564	TG O-40:7	2536196828	1635383418	2618396203	3037618157	4616587590	2533230795	5141001368	3085219065	5670669692	6551779781	6492241239	4494652815	0.0049813	1.8516	3.17925	up
V565	TG O-40:7	4.67295e+08	3.04058e+08	4.73345e+08	569481543	8.41271e+08	4.91921e+08	9.47532e+08	5.57191e+08	900767258	1446412527	1171044381	1026814532	0.0064	1.9222	1.40313	up
V568	TG O-40:7	3.60162e+08	2.11088e+08	2.36251e+08	3.88961e+08	6.24985e+08	2.85965e+08	8.05133e+08	850178200	8.59654e+08	940032393	6.74313e+08	5.73621e+08	0.00038084	2.2316	1.38876	up
V578	TG O-38:3	1834200637	9.38168e+08	1884395920	1995337872	5242400552	2639047701	4169978774	2801701049	4578158041	4854250704	5586773238	4810043266	0.017185	1.8441	2.87588	up
V582	DG 38:2	2585730775	8.74403e+08	2386353776	2011743990	4675058656	2563472688	3192688987	2364878083	4533221359	3942502696	4868191331	5240670060	0.048652	1.5992	2.35466	up
V604	DG 40:7	1103228601	5.32011e+08	5.94969e+08	9.41887e+08	1539097617	6.05783e+08	2757869161	2384623040	1887494272	3174255373	1615578144	11509151271	0.00394775	4.3876	2.59162	up
V606	DG 40:7	8710792582	4655663606	5390579989	8860583545	14109797498	6479825122	17397727992	18026703270	17873564439	19515913585	14698111496	11983358490	0.0007643	2.0639	6.08033	up
V608	TG O-40:7	2.38374e+08	1.47075e+08	1.18564e+08	3.10709e+08	3.16716e+08	192773965	6.01677e+08	7.41048e+08	5.21775e+08	6.74064e+08	2.48671e+08	4.31418e+08	0.0028082	2.4306	1.17961	up
V613	DG 40:6	1678097096	2354964142	1446641541	1599984247	1874894007	1708206811	4228152058	3579530684	4629478215	4751682835	5422653660	3958177434	4.2151e-06	2.4918	3.53134	up
V614	DG 40:6	1.32833e+08	1.39675e+08	9.48454e+07	1.35478e+08	1.87181e+08	1.18221e+08	365231394	4.51787e+08	3.62102e+08	4.59859e+08	3.06743e+08	6.13191e+08	8.4332e-05	3.1661	1.13171	up
V615	DG 40:6	9.79682e+08	4.37708e+08	707027291	1078875058	1496549685	6.03941e+08	1775116893	2587845672	2092646067	2490089893	1674635849	759212100	0.0090951	2.1456	2.00549	up
V622	DG 40:5	1818455871	1445329537	1646973175	2240938313	3382923224	1557911828	3006606821	3398061942	3661650190	4108944878	3253537068	2789159615	0.0033021	1.6719	2.31711	up
V626	DG 40:7	2657978977	1430811333	2153425593	3488410559	5072527463	2383925851	7954479703	7499527378	7326659050	8054174613	6422092088	5707260538	5.3522e-05	2.4998	4.45627	up
V629	DG 40:4	7.96166e+08	5.93642e+08	7.34062e+08	7.7878e+08	1428560495	7.87525e+08	1.69436e+08	6.95034e+08	1.90144e+08	1.98494e+08	1.48792e+08	2.41372e+08	0.00648531	0.32103	1.49279	down
V631	DG 40:4	1.42664e+08	7.82524e+07	1.2844e+08	1.55274e+08	3.14539e+08	1.91388e+08	8.14112e+08	1.69589e+08	9.92561e+08	1050815708	8.5323e+08	1377745617	0.0016851	5.2031	1.7039	up
V637	DG 40:6	1567384396	2166906975	1519674696	1883451932	1889117216	1776259876	4927431086	3602164436	4663447353	4987222731	5477717217	4424347597	1.1119e-06	2.5995	3.70489	up
V639	DG 40:6	317213425	2.94999e+08	275378925	4.54321e+08	6.40357e+08	2.88129e+08	1114206840	1224680027	1059269260	1309143219	9.23726e+08	3.59225e+08	0.0104056	2.6384	1.63591	up
V641	TG O-42:8	1378384636	1197375224	1451361575	2118707757	3126115016	1479725235	3318698776	3091338017	3218102188	3740655620	3003056280	2684949221	0.0018017	1.7725	2.3898	up
V652	TG O-42:7	8.73955e+08	6.66731e+08	8.95644e+08	1014744099	1760385691	1033310340	2.36403e+08	8.52147e+08	2.55994e+08	2.40815e+08	2.24866e+08	3.25657e+08	0.00648531	0.34203	1.59464	down
V653	DG 40:4	1.34118e+08	7.3213e+07	1.34363e+08	1.66859e+08	3.23312e+08	1.90413e+08	8.63413e+08	6.33482e+08	1030113622	1038608222	9.19186e+08	1456961399	3.5079e-05	5.8123	1.91757	up
V679	SM 34:0	6.63173e+08	1191421082	8.04892e+08	7.93863e+08	492259201	9.867e+08	1706906543	1072860234	1030789742	1259860830	1396288556	1291889307	0.0075697	1.573	1.30688	up
V705	DG 42:7	7.97934e+08	4.62438e+08	8.1663e+08	9.09807e+08	2010902620	8.19753e+08	2214192428	1148161325	1761621784	2284912258	1533552816	1567706303	0.0249747	1.8067	1.67682	up
V710	DG 42:7	3.86874e+08	1.97348e+08	2.07972e+08	2.38577e+08	6.29631e+08	2.93568e+08	7.62981e+08	8.15184e+08	8.79032e+08	9.20228e+08	7.93893e+08	7.57543e+08	4.3728e-05	2.5225	1.5076	up
V717	TG O-42:6	2.9197e+08	1.67208e+08	2.57344e+08	3.05687e+08	6.83607e+08	3.18944e+08	7.07715e+08	3.50314e+08	6.36698e+08	9.36853e+08	4.9778e+08	7.64044e+08	0.0163092	1.9229	1.05928	up
V733	DG 42:7	6.05721e+08	411167223	7.3398e+08	749259341	1431908609	701943872	1874587177	989299657	1412338172	1758262730	1204682437	1297781786	0.0080595	1.8423	1.58432	up
V746	TG O-42:6	1.84467e+08	1.20372e+08	2.01349e+08	2.41484e+08	5.328e+08	253116281	668018324	290527351	4.76197e+08	7.0318e+08	3.97963e+08	6.57711e+08	0.012184	2.0824	1.01358	up
V767	Co 8:0	1577758926	1299601637	1357642503	1258748835	1229819665	1116506249	9.50327e+07	1.24406e+08	7.276e+07	7.58213e+07	3.45449e+07	6.87594e+07	3.4875e-09	0.060117	2.48323	down
V775	PC 32:2	5680737706	3411936563	4580215587	4066835832	5245028660	4284971297	1699434299	2890269771	2396398060	2243976266	1982357178	3447280356	0.00056636	0.53758	3.03654	down
V776	PC 32:2	1.04964e+08	9.5041e+07	4.77587e+07	8.64793e+07	1.0711e+08	5.602e+07	3.67093e+08	9.95871e+08	4.30661e+08	6.01422e+08	301081315	194118185	0.0067804	5.811	1.35005	up
V834	PC 33:2	1962403622	1795590551	1541905683	1919820973	1959036298	1671270364	1052341911	1674623412	889410844	9.75708e+08	8.22632e+08	1238715538	0.00072274	0.61322	1.772	down
V838	Co 8:0	2921371906	2450363586	2537992266	2292473855	2239015597	1958573227	1.91384e+08	2.43478e+08	1.61033e+08	1.57069e+08	8.04743e+07	1.383e+08	1.2601e-08	0.067483	3.35429	down
V862	PC 34:5	7.32919e+08	5.59655e+08	5.47617e+08	5.60286e+08	5.6086e+08	4.44183e+08	1.78742e+08	2.47662e+08	2.08262e+08	1.72102e+08	1.41513e+08	1.83913e+08	3.0265e-06	0.33246	1.37126	down
V871	PC 32:1	380585874	2.65565e+08	5.68248e+08	500632382	5.04896e+08	5.62557e+08	6.8648e+08	5.135e+08	8.42917e+08	7.2291e+08	8.74188e+08	7.32337e+08	0.003981	1.5714	1.12604	up
V873	PC 34:4	3.08116e+08	1.95219e+08	4.71954e+08	2.85016e+08	2.92075e+08	1.53642e+08	2.49786e+07	5.60537e+07	3.01302e+07	3.00947e+07	1.58816e+07	4.35614e+07	0.00025285	0.11764	1.07191	down
V882	PC 34:3	10775732843	7464494317	5163894365	5754960986	7442242359	7344635244	4929362039	6317494430	4409058949	4468046912	3730651080	5446184290	0.019554	0.66675	3.09403	down
V892	PC 34:1	2686356939	2114171355	2462078118	2147535849	3056992941	1116235666	3734940697	1674283658	4239788895	3321069961	3452714852	4345750458	0.031375	1.529	1.81196	up
V905	PC 34:0	7113770033	7121186160	6961491322	7020265509	6371532125	5921417512	3017833642	4161664822	5022281097	4472587056	3920134729	3879719957	1.3598e-05	0.60416	3.5443	down
V910	PC 33:3	6.39316e+08	5.60659e+08	5.45307e+08	4.95546e+08	3.67552e+08	2.86748e+08	9.73809e+07	1.87168e+08	1.97569e+08	1.24879e+08	8.17735e+07	8.65302e+07	0.00011043	0.2678	1.30991	down
V932	WE O-53:13	1.91633e+08	8.42407e+07	8.23423e+07	8.8332e+07	1.03599e+08	1.62936e+08	2.88503e+08	5.54931e+08	5.22468e+08	6.14221e+08	5.55474e+08	5.00569e+08	1.5731e-05	4.2578	1.35102	up
V973	PC 35:2	2992911265	4133863537	3586391934	2803545016	2857592002	2909791771	1726615532	2844933832	1730567073	1603668631	1370690934	1826959687	0.00648531	0.57578	2.48068	down
V993	PC 36:6	2051961185	1411979513	1528924219	1985257343	3032878059	1428944195	6.05883e+08	9.02355e+08	7.715e+08	7.293e+08	5.64349e+08	9.84173e+08	0.0013486	0.39839	2.19667	down
V1027	phSM 39:3	5.46003e+08	5.12734e+08	5.67848e+08	5.50084e+08	5.15021e+08	4.8852e+08	1.29098e+08	1.27964e+08	8.03556e+07	8.4395e+07	5.67283e+07	8.17242e+07	1.7021e-10	0.17617	1.47553	down
V1037	PC 36:2	1029181747	1393725220	1277964130	998231379	1063774431	2744107318	5.54193e+08	742994472	6.92973e+08	5.2382e+08	483342884	7.92653e+08	0.00394775	0.44551	1.55026	down
V1105	Co 9:0	3438810771	5009739619	3329823595	3435061683	3275544124	3008509323	1327829073	2419803117	9.54502e+08	9.66911e+08	5.28361e+08	9.78749e+08	0.00394775	0.33381	3.37311	down
V1122	PC 37:3	6.95185e+08	5.09796e+08	5.89736e+08	4.39553e+08	589089288	448842237	1.5173e+08	2.30923e+08	1.87199e+08	1.51823e+08	1.15279e+08	191711031	5.9828e-06	0.31436	1.35011	down
V1137	PC 38:8	513726844	4.99608e+08	4.23395e+08	7.09956e+08	6.60322e+08	4.79839e+08	1.17884e+08	1.43586e+08	7.00255e+07	1.01395e+08	4.97991e+07	1.41962e+08	3.4067e-06	0.19005	1.45278	down
V1139	PC 36:5	8.48811e+08	1519837666	1357395155	1062322505	9.2855e+08	1244734048	1835517061	2050657223	2051222462	1986176249	3434218874	8.49113e+08	0.032814	1.7534	1.68224	up
V1146	PC 38:7	4240785724	4428909138	4678575948	4757993647	3758875340	4109271433	7.7476e+08	7.54339e+08	9.39946e+08	6.51626e+08	3.1184e+08	6.51788e+08	1.4129e-09	0.15724	4.24294	down
V1150	PC 38:7	23529764711	16541013233	17128633418	17480736197	22144757420	15734470958	3989825907	5759219279	6518929050	4843389463	2641226285	9207601315	9.3694e-06	0.29282	8.00624	down
V1155	PC 38:6	35129684225	34705733753	31127941273	31078018275	28320580127	27331966612	18717915557	16192871318	17521840239	17872186627	12201972000	16192919669	3.2936e-06	0.52585	8.52101	down
V1156	PC 38:6	5124156462	4555641647	4597276277	4780858338	4271114111	5008968520	3395271655	1549932422	2246840823	2436120697	1735927110	3149896385	3.6348e-05	0.51217	3.27039	down
V1196	SM 42:3	1634376593	2073578755	1707585065	1559299661	1162391925	1221653154	7.17673e+08	1078086628	8.9608e+08	1135974215	1081120327	6.98365e+08	0.0027174	0.59914	1.64038	down
V1223	PC 38:2	2747254712	1050349574	1272726649	1122600357	1610708056	1078058783	3.48889e+08	2.54087e+08	6.85114e+08	2.92602e+08	4.24134e+08	5.23795e+08	0.00394775	0.2847	2.10039	down
V1250	PEt O-44:7	4209215981	5555584932	4796297325	4967185868	4434244380	3944690145	2322759470	3263104063	1969572643	1979849982	1372390253	2040807138	3.0311e-05	0.46398	3.44618	down
V1258	PG 38:3	5.93013e+08	8.08985e+08	4.03673e+08	4.11327e+08	3.12967e+08	5.62375e+08	2.71876e+08	2.02079e+08	1.24305e+08	1.37658e+08	2.12112e+08	1.76522e+08	0.0015234	0.36366	1.17555	down
V1307	PC 38:7	7.23464e+08	6.02082e+08	5.42315e+08	607356517	599467606	6.68498e+08	151960111	1.0419e+08	9.65485e+07	8.8735e+07	5.47139e+07	1.23212e+08	6.2194e-09	0.16546	1.59699	down
V1308	PC 38:7	2430723133	1545951349	1570700456	1755546197	2406415456	2249526479	1273635873	7.40053e+08	1005009797	1212013402	8.94793e+08	1711303439	0.0030481	0.57169	1.8683	down
V1317	PC 40:9	2165049659	1924865917	2245011509	2482180841	2083365315	2188311764	7.0663e+08	3.02594e+08	4.24587e+08	381887601	2.09266e+08	5.30417e+08	1.1113e-08	0.19523	2.943	down
V1318	PC 40:9	8.1853e+08	1035341402	768444152	9.60234e+08	1061497708	7.09912e+08	132417962	2.68486e+08	111872823	1.11788e+08	4.71827e+07	1.54859e+08	5.3015e-07	0.15439	1.92109	down
V1319	PC 38:6	6.51236e+08	7.45505e+08	8.80346e+08	8.3488e+08	8.24835e+08	8.58164e+08	1523566032	9.20822e+08	2077957835	1986657181	2255850631	1288250187	0.0021669	2.0966	1.95054	up
V1329	PC 40:8	22208680841	23660833539	19549205107	21152011700	19579787103	17987420560	9478650529	10383672612	8418841773	8037601403	4793249243	9376269927	9.4501e-07	0.40671	7.80158	down
V1330	PE 43:8	376704301	4.39768e+08	4.09922e+08	5.3882e+08	4.41219e+08	5.05623e+08	9.09137e+08	8.41928e+08	1001304907	9.99829e+08	1066773993	816319217	1.2341e-06	2.0779	1.54798	up
V1331	PC 40:8	8600133120	7583225900	7810501157	8201347860	6743196663	7594619077	4818148531	3528914662	4484793140	5138880287	2724077068	4277087515	1.1051e-05	0.53665	4.07647	down
V1341	PC 40:7	35644576105	35049093770	26533187296	26965260654	25423465914	22085056584	15393632633	19157362748	15980002192	15546487156	12742981024	16472190617	0.00033839	0.55499	7.95825	down
V1343	PC 40:7	8.7451e+08	1275279109	1030352330	8.3011e+08	8.24331e+08	1445206948	8.20364e+08	5.71686e+08	4.84566e+08	8.79334e+08	4.6944e+08	8.15104e+08	0.016807	0.64341	1.06724	down
V1354	PC 38:3	1125006093	1765936639	1364737013	1069130653	962502400	1327587023	7.88696e+08	9.21809e+08	7.29125e+08	5.6229e+08	6.30356e+08	1224877709	0.013113	0.63785	1.30985	down
V1365	MePC 39:6	1130455854	1488868237	7.21586e+08	7.61057e+08	6.51868e+08	4.95566e+08	4.66997e+08	7.15612e+08	3.61845e+08	5.17242e+08	3.40662e+08	4.76851e+08	0.032693	0.54848	1.40358	down
V1380	PC 38:2	6.80919e+08	2.85935e+08	2.85739e+08	296306368	4.82722e+08	3.81805e+08	8.46622e+07	6.12435e+07	1.00221e+08	6.58292e+07	8.87101e+07	1.62795e+08	0.00085381	0.23347	1.15407	down
V1384	PC 40:5	4385463637	2193215381	2470633853	2149933971	2549081768	1550905782	1337245174	1408859137	1869678935	1687326456	1566627178	1684384698	0.038592	0.62448	1.88096	down
V1397	PC 40:4	3041442707	1344679593	1351933230	1549075735	2066170169	1158160081	5.2636e+08	5.01412e+08	6.47035e+08	6.22517e+08	6.85647e+08	6.4192e+08	0.002645	0.34485	2.2116	down
V1406	SM 45:10	2.10185e+08	2.90957e+08	2.10751e+08	3.80986e+08	3.39057e+08	2.53952e+08	6.70505e+07	9.07939e+07	3.76757e+07	3.46491e+07	1.39104e+07	6.34271e+07	2.0056e-05	0.1824	1.02545	down
V1412	PG 40:6	8.40768e+08	2.72395e+08	5.94925e+08	6.51731e+08	7.84582e+08	9.58408e+08	5.04804e+08	3.67775e+08	3.82557e+08	3.10568e+08	2.83274e+08	5.45531e+08	0.023869	0.58363	1.00044	down
V1417	PC 40:3	8.11243e+08	4.92479e+08	6.41245e+08	5.44749e+08	8.38626e+08	6.0426e+08	3.27509e+08	3.24558e+08	4.41216e+08	3.41961e+08	402902253	4.43229e+08	0.0012451	0.58012	1.09138	down
V1436	TG 50:5	1.86578e+08	8.77059e+07	1.87243e+08	1.94966e+08	1.97595e+08	1.25863e+08	2.63082e+08	1.63482e+08	6.25389e+08	6.82711e+08	6.58777e+08	3.15823e+08	0.0249747	2.7647	1.04773	up
V1444	PG 40:7	4.69735e+08	5.60237e+08	2561119065	2254435415	3018100946	2062142381	2793985142	3017546533	3584709563	2554702381	2245142366	3487125790	0.042126	1.6185	2.00793	up
V1453	TG 51:11	5.25052e+08	9.11804e+08	6.38273e+08	7.00815e+08	7.06734e+08	746637951	6.79978e+07	1.20795e+08	5.33602e+07	7.69063e+07	2.75454e+07	7.08179e+07	3.2586e-07	0.098697	1.7336	down
V1486	PG O-43:7	389356939	7.26219e+08	5.66151e+08	6.44518e+08	6.43737e+08	6.55734e+08	6.63423e+07	1.16411e+08	5.00175e+07	6.60167e+07	2.79243e+07	7.31536e+07	7.0156e-07	0.11029	1.58621	down
V1491	PC 40:9	3.23085e+08	2.63884e+08	3.6574e+08	3.60426e+08	2.64953e+08	2.24614e+08	6.76135e+07	4.48998e+07	6.17205e+07	5.60117e+07	2.64669e+07	5.78105e+07	1.3498e-06	0.17447	1.10355	down
V1497	TG 50:1	5.04501e+08	6.89055e+07	4.98085e+08	4.85345e+08	522694122	7.23136e+08	7.48617e+08	5.8493e+08	8.09786e+08	9.3561e+08	1325121279	7.59112e+08	0.015876	1.8422	1.32947	up
V1502	PC 42:11	1359614351	1620406506	1314639511	1356859427	1443492706	1040717490	3.66066e+08	3.39683e+08	3.01523e+08	2.50346e+08	1.28451e+08	2.88294e+08	1.6494e-07	0.2058	2.31774	down
V1511	phSM 44:4	3246735453	4183273023	3628291661	3805492953	3651307258	3470565067	2295026736	2730413404	1791658553	1826864320	1320058256	2008688931	3.3074e-05	0.54457	2.78	down
V1519	PC 42:10	12999139635	13962140002	12468702298	12610910092	11600515294	11676039400	6572847706	6048792198	5762270577	6405818200	3321823159	7110513846	1.2564e-06	0.46765	5.69953	down
V1558	TG 51:4	5.79955e+08	2.83734e+08	7.23903e+08	5.08493e+08	5.6975e+08	5.43042e+08	179092077	1.63879e+08	2.27581e+08	2.40967e+08	3.3378e+08	2.23275e+08	0.00068601	0.4265	1.18939	down
V1572	PC 40:4	5.98497e+08	3.18191e+08	2.82896e+08	364228444	446303945	2.88653e+08	1.11929e+08	8.34632e+07	1.24235e+08	112285605	1.06633e+08	1.37454e+08	0.00030608	0.29407	1.111	down
V1574	TG 51:3	1172418811	4.81029e+08	1304984171	1013805688	1103963388	1072434648	3.87645e+08	4.17862e+08	5.288e+08	5.55815e+08	9.26449e+08	616339132	0.0091478	0.55832	1.41323	down
V1577	TG O-52:3	215051480	6.01875e+08	2.97437e+08	3.0532e+08	253700091	2.66971e+08	2.89907e+06	2.66246e+06	2.79334e+06	6.06076e+06	554548	2.50058e+06	0.00394775	0.0090039	1.19335	down
V1589	PC 42:6	8.3955e+08	3.67665e+08	3.10525e+08	3.59514e+08	5.41631e+08	2.60602e+08	1.21868e+08	1.37676e+08	1.65154e+08	1.26146e+08	1.47403e+08	1.2266e+08	0.0055032	0.30637	1.13592	down
V1594	TG O-52:2	2.77668e+08	8.3928e+08	3.31226e+08	3.69545e+08	3.16197e+08	3.64243e+08	4.70929e+06	6.1633e+06	3.70444e+06	7.9422e+06	1.96314e+06	5.5378e+06	0.00394775	0.012017	1.32689	down
V1630	TG 52:7	8.50459e+08	5.41412e+07	1.42674e+08	1.64967e+08	1.86861e+08	6.38132e+08	1497976528	1340211189	1776718109	1514782779	1047636490	9.3583e+08	0.00026315	3.9824	2.15652	up
V1639	TG O-52:2	1.86518e+08	523257231	2.52707e+08	2.82215e+08	2.2318e+08	2.42822e+08	3.69909e+06	5.52258e+06	3.34188e+06	7.45175e+06	1.6088e+06	4.94839e+06	0.00394775	0.015533	1.11607	down
V1657	TG 52:5	13977241544	6503911015	13382870854	13503249543	12451581046	10242216003	4872555950	6460972519	6757078733	8302702156	12112723427	4593223005	0.019971	0.61517	4.10526	down
V1672	PC 44:14	2.35404e+08	3.22727e+08	272787875	2.8178e+08	2.63582e+08	1.88471e+08	5.2377e+07	5.24135e+07	4.71531e+07	3.65352e+07	1.98784e+07	4.19233e+07	4.6958e-07	0.15995	1.04122	down
V1677	TG 52:5	1482560669	1022052286	1964653488	1736878363	1501698342	1366002167	5.05867e+08	5.34864e+08	6.33268e+08	8.40805e+08	1568485954	5.89475e+08	0.0249747	0.51497	1.78524	down
V1694	PC 44:12	3422539881	4093738675	3073558554	3915321007	5461454633	3483152638	1745146743	1899193880	1227168143	1160889128	7.40987e+08	1956962185	0.00010544	0.3723	3.32021	down
V1697	TG 52:1	2331815983	1868169924	1882129194	2027509466	2208234447	2636539529	2533255199	3286663059	3587545694	4419268252	6313385310	4175028782	0.0057853	1.877	2.7124	up
V1711	PC O-44:4	4.80631e+08	1382908360	7.53396e+08	6.92127e+08	4.3947e+08	7.73318e+08	1.42332e+08	3.30804e+08	1.55466e+08	148082043	1.4126e+08	1.84373e+08	0.00394775	0.24378	1.5121	down
V1726	TG O-54:6	1.62212e+08	5.31389e+08	270429790	2.91995e+08	2.04231e+08	1.97325e+08	1.17204e+06	4.41443e+06	80154.3	809832	202856	72018.3	0.00394775	0.004073	1.09744	down
V1738	TG 53:5	5.47846e+08	3.23652e+08	6.19657e+08	429003975	5.16593e+08	4.83888e+08	1.9414e+08	2.86148e+08	2.68622e+08	2.8684e+08	252394072	218179206	0.00034826	0.51575	1.01018	down
V1743	SM 48:8	3.4304e+08	6.14934e+08	4.56689e+08	5.68676e+08	5.32814e+08	5.51489e+08	5.33347e+07	1.09072e+08	4.2277e+07	4.34335e+07	1.57665e+07	4.73454e+07	6.4984e-07	0.10146	1.46581	down
V1750	TG 53:4	1216552408	6.65432e+08	1389141218	1085690659	1193229822	1058476829	4.92356e+08	7.03066e+08	6.55071e+08	6.13767e+08	7.9642e+08	6.03096e+08	0.0017141	0.58467	1.39894	down
V1751	TG O-54:4	3.74663e+08	1031520530	5.04649e+08	5.21544e+08	4.67531e+08	394819832	2.18942e+06	5.35753e+06	1.53607e+06	5.77912e+06	73235.3	2.25782e+06	0.00394775	0.0052184	1.5664	down
V1792	TG 54:8	3670718393	9.30577e+08	1995876267	2956511876	3330476570	2418332286	4227668016	4772717545	5441762143	4176171516	2348760038	2855120396	0.046796	1.5568	2.15888	up
V1805	TG 54:7	1839221586	1325345924	2989966571	3300801397	2264091915	1912347074	1166243506	2169457488	1384601949	1664834568	9.05657e+08	8.77126e+08	0.031992	0.59918	1.63859	down
V1807	TG 54:7	4397174165	9.49558e+08	1393575574	2998095758	3833701398	4023110706	7550120871	4688808278	8486056614	6908639498	4890238945	9448856522	0.0019814	2.3855	4.04326	up
V1811	TG 54:6	6462981193	6950549988	9233998044	3063488186	6791341080	7022043827	3517886609	6318627861	7.54796e+08	9.13906e+08	6883463612	827698724	0.03778	0.48619	3.21636	down
V1813	TG 54:6	6474966339	7886218243	9888289243	9066338060	7310951298	7501782890	3767134301	6758447385	4267353453	5355747100	7466371139	3883634379	0.0068255	0.65447	3.18307	down
V1818	d5-TG 54:8	3946213773	4610901119	5946964320	5567021201	4359476818	4464750107	1722901608	3816901751	2194030129	2935121978	4018741944	1671713828	0.002613	0.56616	2.84135	down
V1827	TG 54:7	1889393873	1165465354	1783564567	2262404643	2112689120	1040620387	9.0573e+08	8.16127e+08	1125667229	8.56838e+08	1168402270	7.06588e+08	0.0049332	0.54411	1.78122	down
V1829	TG 54:7	3.45877e+08	2.06444e+08	2.53852e+08	3.71791e+08	4.29932e+08	6.72622e+08	1001028327	5.86832e+08	7.07275e+08	9.60212e+08	769592877	1058441412	0.00098512	2.229	1.44861	up
V1833	PC 44:12	4.72959e+08	4.15576e+08	4.23942e+08	6.32422e+08	8.39972e+08	4.16235e+08	2.73233e+08	2.3758e+08	1.78618e+08	2.11806e+08	1.28598e+08	3.19115e+08	0.00394775	0.4214	1.12613	down
V1843	TG 54:6	623893282	1073720235	1120708412	1006348096	754868145	8.36651e+08	4.14131e+08	4.82412e+08	4.09473e+08	5.34306e+08	8.67253e+08	3.90422e+08	0.0163092	0.57199	1.22108	down
V1854	TG 54:3	2.17062e+08	6.51016e+07	1.864e+08	1.59928e+08	1.80546e+08	2.5078e+08	2.18541e+08	263251255	290591591	3.10346e+08	1633947866	9.71706e+08	0.00648531	3.4802	1.11957	up
V1858	TG 54:5	8.32942e+08	2097662763	2190924139	1621893662	1512083594	825060979	4.0549e+08	6.42621e+08	5.42322e+08	6.58243e+08	1754219309	8.04168e+08	0.0249747	0.52938	1.53863	down
V1864	TG 54:2	8382501988	3333041857	5254408793	5117335236	7738044465	8298874313	7829575575	10017715769	10948855133	12335531850	15622500458	12575633866	0.0035411	1.8185	4.59477	up
V1868	PI 40:9	2.87454e+08	3.70925e+08	4.12223e+08	3.43743e+08	3.52162e+08	1.88709e+08	2.97691e+07	111272161	1.30426e+08	7.93193e+07	7.29668e+06	6.93902e+07	4.6036e-05	0.21863	1.095	down
V1879	TG 54:3	590990492	5.10192e+08	7.24808e+08	6.8716e+08	6.9867e+08	7.47592e+08	3151644020	3507824811	3728175870	3360127912	3202228996	3125487491	1.6461e-10	5.0703	3.67467	up
V1881	TG 54:3	1.20707e+08	1.38571e+08	1.21428e+08	1.10005e+08	7.27317e+08	7.97894e+08	9.69006e+08	8.06943e+08	1094655525	1320112578	1646537075	9.52532e+08	0.00394775	3.3681	1.92349	up
V1888	TG O-56:7	3.74291e+08	1201839927	5.28474e+08	5.0713e+08	4.19479e+08	4.37845e+08	7.99079e+06	2.14386e+07	8.79506e+06	8.74351e+06	17806.5	5.04208e+06	0.00394775	0.014998	1.56102	down
V1891	TG 54:2	1895684350	1019005453	1593595531	1592029788	1914039953	1930436087	2260813462	2498366458	2510131240	2685462540	3021638987	2648944066	0.00031633	1.5712	2.06312	up
V1908	TG O-56:5	4.39138e+08	1528942649	7.12547e+08	6.75738e+08	5.87995e+08	6.17526e+08	3.74746e+06	8.36326e+06	3.16407e+06	6.91399e+06	0	1.59632e+06	0.00394775	0.0052139	1.79826	down
V1915	TG 56:11	8.63617e+07	2.4528e+07	6.15778e+07	9.5955e+07	9.66079e+07	5.68689e+07	4.73188e+08	3.84794e+08	4.62554e+08	3.8805e+08	111114315	176740849	0.0019692	4.732	1.06973	up
V1934	d5-TG 55:5	7.00325e+08	2.60501e+08	6.64039e+08	5.57429e+08	7.57169e+08	716022822	8.98193e+08	7.85847e+08	1040428885	1048519605	1241262613	1081419677	0.0020791	1.6675	1.34314	up
V1958	TG 56:7	16753513091	9257589786	9820084486	11155624479	15461885922	12579303072	18025574710	25125941134	29903618716	17871482694	12776790016	27138710221	0.010447	1.7439	5.83797	up
V1983	TG 56:7	1644209238	1445150208	1321715523	1509803423	8.34197e+08	1508075325	2069915524	2004853187	3049407191	2042451824	1507665869	2465489188	0.0072851	1.5902	1.75534	up
V2028	TG O-58:8	1.68044e+08	7.14344e+08	2.66863e+08	2.27497e+08	1.88719e+08	2.21984e+08	0	4.95501e+06	954463	0	0	0	0.00334562	0.0033063	1.08711	down
V2034	TG 57:7	2.25449e+08	101627595	1.5868e+08	1.79723e+08	2.33501e+08	388827682	6.48127e+08	3.37284e+08	4.85385e+08	6.13416e+08	4.57874e+08	6.88099e+08	0.00074871	2.5083	1.20091	up
V2037	TG O-58:7	1.27755e+08	5.89402e+08	2.53585e+08	2.71432e+08	2.22648e+08	2.74044e+08	1.10929e+06	4.94411e+06	1.40355e+06	778901	521554	2.96238e+06	0.0011328	0.0067399	1.08572	down
V2044	TG O-58:6	2.50039e+08	8.72654e+08	4.05514e+08	3.51968e+08	2.88078e+08	3.88315e+08	2.10269e+06	6.80235e+06	323369	1.74934e+06	17292.4	507063	0.00394775	0.004499	1.33284	down
V2057	TG 58:11	4.5204e+08	3.32021e+08	2.35708e+08	4.20826e+08	3.71684e+08	3.03734e+08	1073202283	1260791259	1661589989	1269518680	200595739	5.05031e+08	0.016552	2.8217	1.62035	up
V2059	TG 58:11	873467812	4.66783e+08	5.06376e+08	7.31848e+08	905796087	7.67741e+08	3372141723	4391682520	4466026133	3436460436	1240035071	2239350635	0.00072973	4.5027	3.4034	up
V2067	TG 58:10	1730116189	1963273012	1292191163	1715379541	1991611642	1903276368	5844920972	6046822278	5084455782	6102075551	2455442214	4208909028	0.00029937	2.807	3.89582	up
V2068	TG 58:10	2.65782e+08	4.1037e+08	1.95993e+08	3.97641e+08	3.8838e+08	4.18761e+08	5244988080	5426165883	4562577908	8.09074e+08	2137166293	894712406	0.0091467	9.1841	3.37297	up
V2070	TG 60:15	1.06541e+08	9.4735e+06	1.47112e+07	4.91572e+07	1.02308e+08	5.79122e+07	4.93219e+08	4.42203e+08	5.81019e+08	4.29885e+08	1.82525e+08	2.9227e+08	0.00020181	7.1188	1.26918	up
V2071	TG 58:12	1.3351e+08	3.66328e+07	6.07716e+07	3.70984e+07	1.27722e+08	7.29522e+07	6.1807e+08	5.5414e+08	7.28095e+08	5.38704e+08	2.26923e+08	9.90612e+07	0.0035384	5.8994	1.28323	up
V2082	TG 58:11	3.20499e+08	1.67589e+08	172854687	226799069	3.39795e+08	2.81728e+08	1161530476	1121852887	1155911776	8.79115e+08	5.46212e+08	9.61058e+08	3.366e-05	3.8599	1.84681	up
V2094	TG 58:10	2.58164e+08	3.97044e+08	2.07123e+08	3.28673e+08	3.44475e+08	3.64083e+08	9.87461e+08	7.17269e+08	744710146	9.29596e+08	4.52871e+08	7.63373e+08	0.0002697	2.4191	1.42835	up
V2096	TG 58:10	1519585906	2277230235	2312689015	2657943457	2170936520	1850330109	1119041850	1557074198	1155325639	1418292308	9.28923e+08	1205284453	0.00067835	0.57738	1.92802	down
V2103	TG 58:7	3.16341e+08	2.97932e+08	2.09382e+08	3.39033e+08	3.8449e+08	2.45712e+08	2147913569	4272746751	597229079	4.38993e+08	1078949463	5.43229e+08	0.00394775	5.0639	2.14114	up
V2159	TG 60:13	9.75995e+08	247657777	2.89221e+08	4.38893e+08	7.8087e+08	4.8077e+08	3485955835	3299467891	3831865459	3042665959	8.42706e+08	1824529863	0.0010998	5.081	3.1403	up
V2160	TG 60:13	4.67639e+07	1.14925e+07	1.46397e+07	3.03873e+07	5.10656e+07	3.26482e+07	5.1731e+08	2.80255e+08	305993486	4.23269e+08	9.19761e+07	2.39624e+08	0.00099509	9.9383	1.09666	up
V2165	PG O-50:5	3.38008e+08	116128894	1.64527e+08	2.63307e+08	3.15272e+08	2.41483e+08	1007885809	1091526761	1147416421	9.72935e+08	2.43469e+08	5.85476e+08	0.0023123	3.5092	1.63458	up
V2166	TG 60:12	3307590461	1721334740	1580447771	2391452968	3804991160	3330603411	16214180867	16933277150	21549991122	15881392392	8601020808	15281060411	2.0637e-05	5.8539	7.91338	up
V2172	TG 60:11	3.66965e+08	4.0265e+08	2.70598e+08	318198356	3.58851e+08	3.82218e+08	1014037539	1205733556	9.26496e+08	1066329753	4.72312e+08	8.68076e+08	0.00025513	2.6449	1.66659	up
V2173	TG 60:11	2348326642	1366374612	1459969941	2461445040	2750500539	2192337031	9.76819e+08	1167895453	1108948046	1496225627	3.84529e+08	6.91015e+08	0.0023582	0.46311	2.04219	down
V2174	TG 60:11	3.23093e+08	2.17196e+08	1.74425e+08	2.54417e+08	3.25818e+08	2.38593e+08	3358932403	5430010125	4347054796	2894829394	1492601931	1990517666	0.00053918	12.725	3.78206	up
V2176	TG 60:13	2.66646e+08	1.50066e+08	1.22101e+08	1.88075e+08	1.94717e+08	1.84386e+08	534574215	1000221137	4.75597e+08	5.60167e+08	1.40451e+08	3.19317e+08	0.023056	2.7399	1.19997	up
V2177	TG 60:13	2.64268e+08	1.2089e+08	1.94584e+08	2.69072e+08	4.2533e+08	2.54761e+08	1206566430	8.96678e+08	1411251115	1045255149	4.89911e+08	8.79416e+08	0.00029323	3.878	1.8141	up
V2181	TG 60:10	2246951506	2087398230	1556029457	1859747555	2635560763	2191421568	6051655557	6844991368	6333827108	5783071671	1989927266	4746463805	0.0014431	2.5244	3.82494	up
V2183	TG 60:12	7.56855e+08	3.73342e+08	4.68102e+08	5.7638e+08	8.8859e+08	7.94268e+08	2588590474	2063094568	2928905776	2653667943	2047751772	2512651759	6.0187e-07	3.8353	2.9821	up
V2184	TG 60:12	6.2181e+08	8.6014e+08	5.32925e+08	8.07357e+08	764942794	5.82281e+08	1182882986	1573712343	1167432021	1101349742	4.74562e+08	9.44143e+08	0.036075	1.5455	1.30318	up
V2189	TG 60:9	5.42139e+08	5.50064e+08	4.34007e+08	4.52994e+08	6.386e+08	5.34708e+08	1076345548	1262189382	1081017375	9.33012e+08	4.24641e+08	8.6504e+08	0.006517	1.7898	1.35399	up
V2190	TG 60:9	9.33303e+07	4.70666e+08	3.70963e+08	8.05638e+07	5.27994e+08	1.18183e+08	9.22629e+08	1081931945	9.0341e+08	7.99765e+08	3.62117e+08	7.23471e+08	0.0025009	2.8846	1.50949	up
V2192	TG 60:9	5.58179e+08	3.42793e+08	2.57624e+08	1554464801	2180007800	4.55566e+08	2215286758	3005077055	2270492459	2108770720	1126623935	2025233252	0.012286	2.3841	2.12801	up
V2193	TG 59:2	3.06828e+08	138132783	2.27251e+08	2.50244e+08	3.56041e+08	3.85119e+08	3.89349e+08	4.24834e+08	478780719	5.4414e+08	7.14181e+08	5.67575e+08	0.0024729	1.8747	1.02707	up
V2196	TG 60:11	1.12913e+08	7.08582e+07	7.29018e+07	1.09176e+08	7.12011e+08	1.06029e+08	8.39125e+08	9.55138e+08	1150360385	9.65959e+08	4.21032e+08	7.3528e+08	0.00648531	4.2799	1.66294	up
V2208	TG 60:10	3.55542e+08	5.10481e+08	3.29143e+08	4.07962e+08	4.72531e+08	4.29309e+08	9.75233e+08	8.34664e+08	9.5456e+08	8.5451e+08	3.83e+08	8.90617e+08	0.0249747	1.9532	1.3088	up
V2227	TG 60:8	8.91003e+07	1.39408e+07	7.08898e+07	1.20877e+08	1.34361e+08	7.60387e+07	5.63306e+08	4.27866e+08	594624027	4.79907e+08	178051637	1.06119e+08	0.0046632	4.6513	1.13097	up
V2238	TG 60:4	7.54451e+07	5.75424e+07	7.9527e+07	8.30633e+07	9.26847e+07	9.61072e+07	3.07529e+08	4.00997e+08	3.6687e+08	3.89946e+08	3.63585e+08	2.94032e+08	4.4683e-08	4.3829	1.16992	up
V2242	TG 60:6	220325545	2.92482e+08	1.70052e+08	210052528	2.53134e+08	2.80631e+08	9.78045e+08	6.96176e+08	6.86104e+08	8.46448e+08	3.91468e+08	7.41788e+08	0.00015156	3.0421	1.49069	up
V2264	TG 62:14	2720950303	2259629959	1505831647	2897652719	2674805988	1968533757	7668231222	14253146736	6343377239	7677254319	1410078347	4452190415	0.025242	2.9802	4.55344	up
V2269	TG 62:13	4029025769	2604415118	2161493109	3298040617	4259378024	3088329078	10216381254	14543803724	10133968227	9458487966	3076622435	7485343799	0.0037268	2.8247	5.19485	up
V2270	TG 62:13	4.58175e+08	3.65139e+08	2.54154e+08	472003396	564693459	3.33586e+08	1412304289	4367835151	1659190511	1456638645	3.43167e+08	9.30925e+08	0.047611	4.1549	2.36447	up
V2273	TG 62:12	1.44848e+08	1.42755e+08	5.76588e+07	9.51267e+07	1.2503e+08	1.42811e+08	1961853768	3461117219	4.46807e+08	4.98574e+08	1.96027e+08	1307266198	0.040216	11.115	2.17108	up
V2274	TG 62:12	5.47437e+08	4.16103e+08	3.24986e+08	5.19515e+08	6.97951e+08	5.66575e+08	1350215753	2285869889	1267468761	1455950923	5.03897e+08	1373371543	0.0046426	2.6807	1.95884	up
V2275	TG 62:12	7.97851e+08	8.04451e+08	4.43517e+08	6.77672e+08	8.85837e+08	6.77878e+08	2630420100	4640606987	2440498675	2457406732	8.21483e+08	1752818818	0.0072927	3.4389	2.84288	up
V2277	TG 62:14	1002142617	1083263253	8.43208e+08	1392090523	1269895884	8.95377e+08	2274788377	3324864046	2051341935	2398370406	7.8276e+08	1756804095	0.015985	1.9409	2.11255	up
V2278	TG 62:11	195688568	1.88856e+08	1.22181e+08	2.11013e+08	2.28126e+08	173428641	648183027	1084897431	6.21721e+08	5.64521e+08	2.09448e+08	4.3066e+08	0.0066639	3.1801	1.36718	up
V2279	TG 62:11	369484513	526739108	2.43687e+08	3.1997e+08	4.29826e+08	3.72571e+08	1033556387	1696118286	1067501953	991016036	2.64971e+08	8.64031e+08	0.0096621	2.6156	1.68258	up
V2281	TG 62:13	988353975	8.59803e+08	6.98002e+08	8.97637e+08	1151349183	832645960	1806899101	2009784594	1774846944	1644679785	8.60105e+08	1634846448	0.0020602	1.7928	1.7836	up
V2282	TG 62:13	1.41544e+08	1.36591e+08	8.58098e+07	1.51023e+08	1.93247e+08	1.16797e+08	3.62827e+08	7.61464e+08	3.98277e+08	3.33927e+08	1.37333e+08	3.10783e+08	0.016075	2.7934	1.04749	up
V2290	TG 62:12	1.44169e+08	1.73778e+08	9.77613e+07	1.52125e+08	1.89662e+08	1.37385e+08	4.64356e+08	5.89718e+08	4.24767e+08	4.16982e+08	1.73783e+08	3.4707e+08	0.0013509	2.7006	1.09323	up
V2323	TG 64:16	1.52866e+08	2.37135e+08	7.5825e+07	1.63032e+08	1.63869e+08	1.15069e+08	9.92143e+08	1779997540	752784595	1071871369	1.31566e+08	5.28856e+08	0.010071	5.7912	1.83066	up
V2325	TG 64:15	9.68155e+07	7.84625e+07	41616292	8.46992e+07	1.0996e+08	7.80577e+07	8.76586e+08	1289842303	7.61077e+08	8.32727e+08	1.29679e+08	4.47828e+08	0.0027072	8.8596	1.7298	up
V2331	TG 64:16	5.39353e+07	5.33401e+07	3.94601e+07	8.71977e+07	9.94441e+07	6.34876e+07	4.42189e+08	5.04495e+08	3.34937e+08	4.44501e+08	9.22763e+07	3.07564e+08	0.00082652	5.3569	1.15267	up
V2351	TG 66:18	1.15435e+08	9.0672e+07	3.42388e+07	1.02314e+08	1.61262e+08	7.1631e+07	1447639484	3180601092	1212519865	1595583345	1.74847e+08	7.20403e+08	0.011256	14.476	2.42465	up
V2354	TG 66:17	3.43291e+07	3.16845e+07	1.00505e+07	2.63253e+07	4.99597e+07	1.86699e+07	3.65212e+08	1333045569	4.3681e+08	438421164	4.95042e+07	2.11278e+08	0.035568	16.573	1.39664	up
V2358	TG 66:16	3.75825e+07	3.90728e+07	1.65486e+07	4.36432e+07	5.53702e+07	3.68456e+07	2.60176e+08	5.13288e+08	2.49977e+08	3.17785e+08	6.28356e+07	1.88319e+08	0.0040083	6.9517	1.0278	up
V2360	TG 66:18	7.86461e+07	5.86626e+07	2.94132e+07	7.59832e+07	1.12113e+08	3.62503e+07	714073561	1301821623	7.03642e+08	8.26605e+08	1.41665e+08	473647802	0.0025781	10.641	1.71667	up
V2401	FA 17:1	1484071633	1124394152	1673280178	1343828891	1732741752	1136771979	6.29677e+08	8.31639e+08	6.88613e+08	6.81816e+08	796801276	821825519	0.00012819	0.52388	1.77443	down
V2404	FA 17:0	9.94267e+08	1183941959	1104914025	1013359957	1021210664	9.57413e+08	5.17251e+08	6.5857e+08	5.05217e+08	5.26289e+08	4.43986e+08	487175594	4.0279e-07	0.50015	1.59648	down
V2409	FA 18:3	8.66046e+08	6.99307e+08	8.92438e+08	9.8067e+08	7.73089e+08	6.63578e+08	4.262e+08	4.1857e+08	4.1106e+08	4.57721e+08	5.03707e+08	348481529	3.1755e-05	0.52629	1.34831	down
V2411	FA 18:2	8980320004	7618405664	5984030741	7228466358	9215554659	5422993530	4493595621	5434254540	4227070685	3968876555	4368750102	3470227528	0.0011004	0.58409	3.73029	down
V2415	FA 18:0	7.08922e+08	7.04589e+08	647309364	6.99507e+08	7.89033e+08	612430985	3.18161e+08	5.47691e+08	4.39635e+08	4.80477e+08	518589065	4.50209e+08	0.00019251	0.66192	1.02584	down
V2421	FA 19:1	8.22799e+08	7.25584e+08	1004869355	9.10816e+08	1531422491	8.03511e+08	4.59672e+08	714202780	5.59499e+08	536330191	7.41267e+08	7.00607e+08	0.00648531	0.64004	1.1164	down
V2435	FA 20:0	6.00557e+08	2.87162e+08	3.99276e+08	3.15421e+08	541074792	3.25123e+08	1.24236e+08	2.20432e+08	1.88277e+08	1.38492e+08	2.01915e+08	1.55987e+08	0.0014855	0.41697	1.00954	down
V2462	FA 22:1	1646689759	6.33738e+08	8.20269e+08	7.38237e+08	1708265008	9.32632e+08	3.51534e+08	5.3964e+08	6.17254e+08	4.16567e+08	5.43499e+08	5.20888e+08	0.014565	0.46134	1.43952	down
V2483	FA 24:1	1825416171	1373942576	1262765754	1485712092	1881229456	1343119227	9.4609e+08	1173046105	1025158204	7.06551e+08	7.02434e+08	992246697	0.00097394	0.6046	1.62023	down
V2526	LPE 18:2	6.35665e+08	5.38412e+08	6.43e+08	6.97943e+08	8.33783e+08	537311805	3.4178e+08	4.76502e+08	3.23224e+08	2.85372e+08	2.73117e+08	2.74506e+08	0.00394775	0.50809	1.18807	down
V2546	LPE 20:4	6012183375	4959365828	5090321071	5627417717	5993461320	4971621236	4296754631	3506057422	3436908280	3740788034	2728686086	3384262947	5.9632e-05	0.64596	2.9672	down
V2618	LPC 19:2	7.70628e+08	6.26106e+08	6.03401e+08	5.51767e+08	6.11005e+08	5.75638e+08	3.12779e+08	5.02202e+08	3.34384e+08	2.88784e+08	2.17019e+08	302402888	0.00014198	0.52362	1.18149	down
V2687	Cer 37:1	4.18312e+08	9.11264e+08	7.43425e+08	5.04475e+08	3.69338e+08	8.44931e+08	1432487583	2552572058	1315192023	1589285535	1639591089	1731272986	0.00033507	2.706	2.2263	up
V2688	LPC 23:6	8.04704e+08	763916387	664945666	712709098	8.39769e+08	6.32401e+08	4.74548e+08	5.77897e+08	4.35856e+08	4.64891e+08	3.423e+08	4.99918e+08	0.0001462	0.63267	1.13171	down
V2753	Cer 41:2	8.44278e+08	1.39885e+08	1.21486e+08	1.73596e+08	8.75282e+08	6.75684e+08	2.61725e+08	7.11482e+07	4.48834e+07	4.36444e+07	1.70522e+08	6.12277e+07	0.039385	0.23078	1.04902	down
V2757	Cer 41:2	7.93878e+08	4.51101e+08	5.65128e+08	5.67466e+08	8.23888e+08	6.34899e+08	2.4929e+08	2.76615e+08	2.47008e+08	2.52767e+08	1.62976e+08	3.27325e+08	0.00010713	0.39516	1.31946	down
V2804	Cer 42:3	5657489762	4374694384	4078995927	4922195514	5045825963	3751588914	2482209367	3763082432	2566663850	2999608226	2386361978	2816419036	0.00046039	0.61135	2.8919	down
V2808	Cer 43:2	1013462730	6.47969e+08	795408028	7.0742e+08	7.46248e+08	202353603	8.36396e+07	1.09218e+08	7.37699e+07	9.16991e+07	8.44351e+07	1.03125e+08	0.00028866	0.13273	1.69145	down
V2813	Cer 42:1	5.30714e+08	4.19554e+08	5.29874e+08	5.21342e+08	6.10768e+08	5.53428e+08	2.01252e+08	2.77729e+08	3.38459e+08	2.80827e+08	2.56819e+08	3.38472e+08	2.2801e-05	0.53497	1.0683	down
V2871	PE 36:5	4.72507e+08	2.83088e+08	3.74741e+08	3.85952e+08	3.13003e+08	222174945	7.2803e+07	1.44167e+08	1.71687e+08	1.44394e+08	7.16035e+07	7.82001e+07	0.00020818	0.33286	1.02323	down
V2893	PG 34:2	1163003881	7.30929e+08	951827429	7.4941e+08	1096320257	646679431	2.61053e+08	5.54613e+08	8.56174e+08	4.83314e+08	518433175	6.07356e+08	0.015069	0.61462	1.11949	down
V2899	LBPA 34:1	2245040756	1399104742	1608999805	1877866802	1884400835	1793749668	4.68207e+08	1699873580	1481536380	1760774887	5.11995e+08	5.71875e+08	0.037373	0.60081	1.46626	down
V2937	PE 38:6	4.15244e+08	3.82375e+08	4.79353e+08	5.09382e+08	4.02362e+08	3.89098e+08	9.65188e+07	3.72898e+07	1.47544e+08	1.2207e+08	9.82379e+07	1.16247e+08	2.0245e-07	0.2397	1.26964	down
V2945	PE 38:5	5216270656	3857220778	3926670269	4309371792	3983146607	3696305363	2638385271	2955682486	2771239165	2756678548	2247810721	2359775332	0.0001088	0.62946	2.67703	down
V2960	PG 36:4	8843370988	11392945082	1400999738	1225978114	1008369535	6.85266e+08	4.70256e+08	1400311654	3.99485e+08	6.79721e+08	2.96181e+08	2.70554e+08	0.0163092	0.1432	4.01384	down
V3016	PE 40:7	5329367506	3799541303	3295218379	3163042782	3418924770	2527483650	2479322270	3506423470	7.82487e+08	7.74255e+08	678971757	2673547532	0.018591	0.50595	2.83643	down
V3051	LBPA 38:5	7.24196e+08	1415293918	1224389763	1091309654	1544999466	1727221841	571148836	599731415	5.32925e+08	691778508	7.05005e+08	1053454628	0.0047421	0.53757	1.5201	down
V3104	PC 34:3	4.54648e+08	3.36802e+08	5.06578e+08	4.4628e+08	5.85751e+08	4.60536e+08	1.2655e+08	2.26624e+08	1.50572e+08	1.63789e+08	1.24052e+08	2.92038e+08	5.7764e-05	0.38831	1.1466	down
V3106	PC 35:3	4.17476e+08	2.95621e+08	4.55664e+08	4.69256e+08	5.6146e+08	4.26175e+08	1.21361e+08	2.17326e+08	1.44397e+08	1.57073e+08	1.18326e+08	2.79794e+08	0.00012442	0.39544	1.09759	down
V3126	PG 40:7	2.24834e+08	1.86994e+08	2.13285e+08	2.22466e+08	3.52746e+08	6.65735e+08	8.83339e+08	3.21868e+08	4.29626e+08	2.90112e+08	7.81354e+08	9.91597e+08	0.037373	1.9817	1.03485	up
V3132	LBPA 40:6	6.13336e+08	1114913487	8.8002e+08	6.79899e+08	1086426030	8.93056e+08	5.004e+08	517202570	6.27004e+08	4.70416e+08	4.15339e+08	6.71783e+08	0.0039443	0.60789	1.13566	down
V3191	PC 37:4	5.36459e+08	4.5078e+08	4.29969e+08	4.43711e+08	4.56508e+08	3.9685e+08	1.38172e+08	2.17894e+08	1.31763e+08	1.34425e+08	9.77074e+07	156658980	2.4113e-07	0.32297	1.23413	down
V3193	PS 40:3	5.24816e+08	440996942	4.20614e+08	4.3408e+08	4.46601e+08	3.88631e+08	1.35173e+08	2.13165e+08	128903177	1.31507e+08	9.55869e+07	1.53259e+08	2.3805e-07	0.32292	1.22075	down
V3198	PG 42:10	4.32331e+07	3.24112e+08	172643335	2.19047e+08	1.89162e+08	1.61553e+08	5.79882e+08	6.67223e+08	4.7036e+08	4.33376e+08	2.87267e+08	3.42559e+08	0.0023864	2.5057	1.1271	up
V3200	PC 37:3	1637437040	1204461467	1354545835	1323564591	4.82644e+08	1365422182	3.05262e+08	1110792017	1189439008	1078487665	2.77514e+08	3.58649e+08	0.0163092	0.58633	1.19249	down
V3263	PC 39:7	5.35742e+08	3.61184e+08	3.61708e+08	3.84222e+08	4.86372e+08	3.62046e+08	1.21592e+08	1.41223e+08	1.6103e+08	182827225	1.3837e+08	2.29905e+08	0.00394775	0.39134	1.09567	down
V3265	PS 42:5	7.16077e+08	6.61646e+08	6.61982e+08	6.56929e+08	5.92737e+08	5.83738e+08	2.75649e+08	3.03675e+08	3.09232e+08	2.96569e+08	1.76367e+08	2.63108e+08	1.2542e-07	0.41946	1.35696	down
V3267	LBPA 44:12	1936016262	2113989288	1444525698	1584665965	1297088064	1558396277	1449385916	4322918151	3664716622	3160422765	2608731615	2301960812	0.015938	1.7623	2.32239	up
V3336	PC 41:8	5.47301e+08	6.0174e+08	4.62667e+08	4.90693e+08	4.69647e+08	4.6935e+08	243490552	2.67202e+08	188822599	2.11853e+08	1.31499e+08	2.38384e+08	2.0802e-06	0.42127	1.19996	down
V3340	PC 41:7	8.47252e+08	8.46507e+08	7.49612e+08	734603237	7.08344e+08	678333998	3.94565e+08	4.48765e+08	3.80177e+08	3.80127e+08	2.90836e+08	4.39394e+08	1.5287e-06	0.51129	1.36165	down
V3372	PI 40:6	7.83281e+07	7.18574e+07	8.43263e+07	8.67607e+07	7.34168e+07	1.09351e+08	5.54138e+08	3.49281e+08	3.83581e+08	4.76508e+08	5.92787e+08	4.17234e+08	2.55e-06	5.5026	1.33705	up

## Sheet: MT vs MW
Identification number	Lipid name	MW						MT						Paired comparison
		MW1	MW2	MW3	MW4	MW5	MW6	MT1	MT2	MT3	MT4	MT5	MT6	MT/MW p value	MT/MW FC	MT/MW VIP	MT/MW regulation
V34	CAR 16:0	3.59564e+08	2.67934e+08	4.06904e+08	4.14821e+08	3.76436e+08	2.14419e+08	1742624440	4227530021	1361222991	1969629621	1566355804	1360774161	0.00394775	5.994	2.15176	up
V46	CAR 18:0	2.4907e+08	211097008	3.54704e+08	3.58414e+08	2.76863e+08	1.50507e+08	1103571921	3347361046	862187453	9.31565e+08	8.20741e+08	623210557	0.00394775	4.8034	1.50415	up
V63	CAR 20:4	1.88882e+08	1.27136e+08	1.92428e+08	2.24787e+08	1.42369e+08	1.45021e+08	6.27412e+08	1055906744	6.21747e+08	641210257	6.87873e+08	5.7753e+08	0.00394775	4.1266	1.30211	up
V71	LPE 16:0	1645559288	1580951699	987341717	1296587911	1739518636	1427765698	6.3933e+08	6.93687e+08	8.23577e+08	7.91779e+08	1013017903	6.40699e+08	0.00031242	0.53033	1.44891	down
V94	LPE 14:0	2.39695e+08	3.42983e+08	1074827125	7.75196e+08	5.57796e+08	342565997	8.38269e+07	9.29831e+07	1.16518e+08	8.32154e+07	5.58991e+07	1.24491e+08	0.0053202	0.16709	1.20287	down
V109	LPC 15:2	7.39753e+08	7.04671e+08	4.46106e+08	5.16691e+08	9.19306e+08	5.89925e+08	154657704	311521662	1.98095e+08	1.51689e+08	1.60909e+08	1.46129e+08	0.00394775	0.28674	1.20707	down
V122	LPC O-16:0	4.0395e+08	3.59358e+08	7.18645e+08	6.70969e+08	1308139172	3.98267e+08	3.9176e+07	4.13322e+07	4.83385e+07	4.7597e+07	2.88633e+07	2.94389e+07	0.0020962	0.060826	1.37341	down
V128	LPC 16:1	2752776817	3076945437	6331016249	5831433074	4495988595	3006587011	1118028677	1094627938	1675491087	1166951877	818541419	1692650368	0.00098231	0.29678	3.14401	down
V140	PE O-20:3	1275310581	1353621730	8.33335e+08	1075186066	1270739619	9.48422e+08	1385626103	1688896046	1639739022	1767225185	2626551939	1361860217	0.013502	1.5496	1.21327	up
V143	LPC O-18:3	1155334169	9.47402e+08	1317731269	1499155562	2696504169	8.07117e+08	1.90652e+08	1.21908e+08	1.33895e+08	1.26845e+08	1.43424e+08	1.32828e+08	0.00394775	0.10086	1.98913	down
V150	LPC 17:1	6.08864e+08	5.02938e+08	8.72948e+08	8.88496e+08	1097511831	503119314	1.40632e+08	1.72695e+08	1.78907e+08	1.14894e+08	7.47839e+07	1.87874e+08	0.00014256	0.19441	1.42519	down
V154	LPC O-18:1	1.97791e+08	2.11299e+08	7.71651e+08	6.98651e+08	8.40426e+08	2.265e+08	9.63391e+07	103584910	1.4308e+08	1.02497e+08	6.33575e+07	9.69269e+07	0.00394775	0.20561	1.1511	down
V159	LPC 17:0	2482097080	1926818691	3497134014	3730473534	6249413081	1719788422	1249239090	1341710259	1201709385	1037081537	6.51136e+08	1038281700	0.010112	0.33251	2.60357	down
V170	LPC 18:3	11896819032	13166114482	6857394029	8399112384	13915199977	9274460901	16617536836	17227391951	14593414915	18132855343	17467336489	14124994103	0.0014697	1.5457	4.04062	up
V173	LPC 18:2	35887272617	35965296916	31751372668	31890761302	34456523260	30500464540	14554209960	23653318554	16269494604	13817380409	10967344271	14010779426	4.571e-06	0.46531	7.62829	down
V174	LPC 18:2	5.27395e+08	7.27474e+08	869013895	9.22807e+08	6.72665e+08	1.28406e+08	3.18462e+07	2.63827e+07	2.13542e+07	1.22334e+07	3.36668e+07	1.1027e+07	0.00037197	0.035478	1.41708	down
V175	Cer 34:1	4.57709e+08	397745135	1.47197e+08	1.95608e+08	2.67818e+08	124785348	6.52225e+08	1574913882	7.88156e+08	9.60452e+08	5.22911e+08	4.36606e+08	0.010562	3.1023	1.18489	up
V191	LPC O-20:4	1.27674e+08	1.59353e+08	7.61493e+08	6.48474e+08	9.12252e+08	1.71989e+08	8.32082e+07	6.46554e+07	1.01176e+08	7.53402e+07	5.18206e+07	8.21446e+07	0.022254	0.1648	1.13942	down
V193	LPC 17:0	6837211417	5272870916	5642272714	7103174555	13676755158	3254853941	2463401333	3323524100	2334610495	2233708378	1638890876	1780553678	0.01006	0.32964	3.63974	down
V210	LPC 20:5	4395050407	5298139723	3250752954	3649137579	5690800491	5430094818	2434191344	3469998895	2458239515	2382858193	2336115239	2347429476	0.00648531	0.55672	2.43507	down
V211	LPC 18:2	4.52828e+08	5.54731e+08	6.87222e+08	6.06747e+08	5.17405e+08	3.61687e+08	1.28992e+08	1.89215e+08	1.23213e+08	1.31176e+08	9.32385e+07	1.37881e+08	9.7927e-06	0.25269	1.1504	down
V212	LPC 18:2	1442209162	1642465140	8.41584e+08	1167915213	1436852034	7.21844e+08	4.12356e+08	5.87249e+08	3.17749e+08	3.76586e+08	2.33993e+08	234114486	0.00032658	0.2981	1.60135	down
V213	LPC 20:5	4023345401	4051772822	4405877201	3730412286	2971713969	2429248737	7.08963e+08	7.23001e+08	884375511	4.66679e+08	3.62624e+08	5.07281e+08	2.6447e-06	0.16902	3.13781	down
V219	LPC 20:3	10307479081	10547601019	14071868040	15526287165	12119783190	8209805700	7081606360	4728447490	9006971016	5766451560	6304747786	8296638491	0.0030812	0.58185	3.94753	down
V223	LPC 20:2	1396334121	1333333666	2521413018	2873108583	2553719761	9.7946e+08	1094210563	1279804115	1040048180	9.46996e+08	8.21441e+08	1167706655	0.023661	0.54474	1.78408	down
V224	Cer 36:1	2.90493e+08	2.62319e+08	1.10178e+08	1.4877e+08	1.48636e+08	125801637	4.8508e+08	9.7018e+08	4.56247e+08	6.35798e+08	5.43871e+08	4.7413e+08	0.00394775	3.2824	1.09585	up
V228	LPC 20:0	2057284920	1832470449	9.74216e+08	9.58932e+08	2252733329	1733144670	1.39065e+08	144297604	1.8028e+08	1.41848e+08	1.63243e+08	1.7161e+08	6.0638e-05	0.095867	2.18657	down
V237	DG O-33:6	6.14862e+08	9.54855e+08	1607931475	1197569048	8.61242e+08	9.96806e+08	9.90736e+07	2.13412e+07	1.93905e+07	7.68022e+07	2.85349e+06	2.5521e+07	2.9247e-05	0.039302	1.78628	down
V250	LPC 20:5	1055213707	1129841213	1275912726	1045568776	9.08917e+08	8.12889e+08	2.19599e+08	1.82691e+08	2.37205e+08	1.3618e+08	1.12719e+08	1.40659e+08	2.0519e-07	0.16522	1.70392	down
V252	LPC 20:4	1468225152	1757582398	5.32997e+08	1831191153	4.57026e+08	1665916638	3390367594	3114421336	3217750177	3703702543	3292833451	2935076561	2.9327e-05	2.5482	2.54587	up
V262	LPC 22:6	30325301653	28690166206	25205285597	27714611727	30601643031	22393185948	17094507608	18199906413	13491639354	15143651518	8648335475	15857081266	5.2372e-05	0.5362	6.36082	down
V281	LPC 22:3	1438377250	1111069211	517632879	5.73835e+08	1828451858	8.1638e+08	9.1171e+07	9.41281e+07	1.1093e+08	7.99197e+07	1.12467e+08	1.17459e+08	0.0011396	0.09642	1.66615	down
V325	TG O-32:0	5.30988e+08	515104479	6.18523e+08	7.28576e+08	7.01643e+08	3.7456e+08	9.08002e+08	4.16494e+08	8.70127e+08	1261056393	1702939487	1354677190	0.024195	1.8774	1.03464	up
V354	Cer 40:2	1486391793	1434253853	4.80245e+08	5.38413e+08	1070318278	9.81932e+08	1.0324e+08	2.44326e+08	1.33574e+08	1.45474e+08	9.55621e+07	1.73626e+08	0.00069436	0.14951	1.65067	down
V359	Cer 40:1	1010590920	1132065310	2.24483e+08	2.44443e+08	5.57969e+08	6.77057e+08	1.20808e+08	1.58892e+08	1.41049e+08	1.41032e+08	1.55434e+08	1.47247e+08	0.0092746	0.22473	1.25982	down
V369	DG 34:2	5.18611e+08	8.85315e+08	3011996266	3768591986	1055494119	2943094932	4575311803	4492402951	5959984060	2160821310	9202151875	3823274045	0.023233	2.48	2.56845	up
V371	DG 34:2	2813764407	3392036437	2561184572	3255196275	4798735905	2413721907	4831896989	2768434769	5157617471	6400642400	7611714564	4317276526	0.028343	1.6162	2.06093	up
V376	PG O-25:0	3.15526e+08	4.68778e+08	4.89503e+08	2.99308e+08	3.24593e+08	8.44188e+08	7.19645e+07	1.08266e+07	1.77967e+07	7.39803e+07	0	1.77177e+07	0.00055653	0.070129	1.11408	down
V378	DG 34:1	1107941431	1297309631	2024402114	2468529503	1857854560	8.93667e+08	4342643456	2406747965	4764670435	5770219306	7511352143	5798392564	0.00083722	3.1705	3.13374	up
V388	DG 34:2	3406665398	7.82512e+08	3092043761	8.97438e+08	5829636228	3311947513	5552560414	3002260765	4927380298	6910238695	9545906259	4311600722	0.041337	1.9775	2.4177	up
V393	Cer 41:2	4.46171e+08	4.17657e+08	3.40142e+08	4.4721e+08	5.43935e+08	298256702	3.85637e+07	4.72836e+07	4.97561e+07	3.7148e+07	2.22658e+07	4.74426e+07	1.0272e-06	0.097242	1.12522	down
V394	DG 34:1	3282336557	3820063665	6671967314	6961542532	6167363184	3633098626	11801162908	6135462944	11794701281	12590550503	16057165121	14480680833	0.0010267	2.386	4.44	up
V397	DG 36:4	3.67857e+07	9.94471e+07	6.16385e+07	8.31482e+07	7.59768e+07	4.25513e+07	4.3306e+08	6.71734e+07	4.79618e+08	6.57301e+08	7.85823e+08	6.69789e+08	0.0015955	7.7407	1.11206	up
V405	TG O-36:3	2.36892e+08	3.16251e+08	4.89155e+08	6.0956e+08	6.83629e+08	2.38753e+08	1174004967	1075436759	1203414304	1515183535	1921201661	1070736452	0.00019728	3.0922	1.65285	up
V408	LPC O-27:8	4.16272e+08	6.16423e+08	6.40812e+08	5.89213e+08	1114457697	735995910	1.74508e+06	1.19148e+06	1.2932e+06	4.6439e+06	971298	1.34287e+06	0.00394775	0.00272	1.47957	down
V410	Cer 40:2	1486584997	1483334256	5.01287e+08	5.55266e+08	1037968459	984174830	1.14242e+08	2.38553e+08	1.43859e+08	1.42179e+08	1.12428e+08	1.40155e+08	0.00394775	0.14738	1.6635	down
V416	DG 36:2	1.11422e+08	1.17745e+08	1.4596e+08	2.05149e+08	1.98816e+08	7.63508e+07	494725233	4.61556e+08	5.94306e+08	5.45337e+08	8.44219e+08	4.96389e+08	0.00394775	4.0173	1.15677	up
V447	Cer 41:4	6.08622e+08	5.6487e+08	1.6322e+08	1.57831e+08	3.60069e+08	4.27625e+08	2.60172e+07	3.05993e+07	2.51778e+07	2.7032e+07	1.95577e+07	2.57886e+07	0.0011253	0.067553	1.08026	down
V448	WE O-42:4	9.30209e+08	9.9027e+08	6.49794e+08	7.24318e+08	8.78685e+08	6.7283e+08	131769008	4.4516e+08	1.36311e+08	154542637	100615588	1.83109e+08	0.00394775	0.23762	1.41317	down
V458	DG 36:4	8.14956e+08	971942132	9.34418e+08	1201808535	1057614534	9.05238e+08	2275168925	1145342999	1623000105	2685327969	2831266083	1091273866	0.012542	1.9795	1.54125	up
V460	Cer 41:2	5.42076e+08	586437663	4.35157e+08	5.78443e+08	6.7881e+08	3.79292e+08	4.82193e+07	6.25075e+07	6.21381e+07	4.68867e+07	2.84829e+07	6.43679e+07	8.3471e-07	0.097682	1.27498	down
V466	TG O-36:3	3549437715	4362018165	6549830357	8522933812	10362164811	3388851066	16713228972	16790906823	17921048624	21794380421	26645991508	15058099414	0.00010625	3.1284	6.36727	up
V471	DG 36:2	3698260068	3924891770	4865047631	6211464901	5977764042	2473090741	12459746014	13544471733	18732518685	16715820961	22696645016	15469205832	2.3018e-05	3.6691	6.17292	up
V475	DG 36:4	4.0534e+08	5.32766e+08	5.50693e+08	5.87155e+08	7.93014e+08	6.24452e+08	1556975536	6.51897e+08	1028012108	1809896041	1794934842	6.07232e+08	0.017254	2.1323	1.26149	up
V477	DG 36:1	5.14207e+08	5.2786e+08	6.1384e+08	8.17974e+08	7.49812e+08	3.28556e+08	1006643779	1043145351	1273451343	1395865463	2046900306	1397340215	0.0010907	2.2981	1.45848	up
V479	DG 36:3	3.42948e+08	3.86907e+08	7.023e+07	1.76687e+08	2.37523e+08	1.09379e+08	8.35391e+08	2.19064e+08	8.58919e+08	1165070020	1473914476	1006654491	0.0027128	4.1997	1.39067	up
V480	TG O-36:3	2579325845	3393722764	5843550452	6861972373	8088343008	3122849188	13392854129	12834401532	14750976436	17694372531	20944238907	11627836076	0.00012958	3.0527	5.64609	up
V481	DG 38:6	9.67564e+07	105621917	9.63501e+07	1.21283e+08	8.02032e+07	100861617	1181733475	6.54674e+08	1213163595	1641549317	1510370205	1071227140	1.4285e-05	12.099	1.90055	up
V482	LPC O-27:8	2.56621e+08	4.23028e+08	5.12194e+08	4.45192e+08	9.7728e+08	5.66485e+08	1.18998e+06	92809.5	466520	3.12976e+06	964528	728300	0.00033094	0.0020661	1.27378	down
V483	Cer 42:5	1217930173	1434174779	1356208564	1652967466	1898035169	9.44619e+08	8.21808e+08	9.06259e+08	9.2695e+08	7.20737e+08	6.71948e+08	1087333485	0.0037095	0.60384	1.33796	down
V485	DG 36:2	4736865808	4974044224	6677583626	7823508071	7487616800	3790265210	14364634821	12761604077	17513891208	16725577798	20808579524	16622016700	1.1276e-05	2.7838	5.80567	up
V488	DG 38:5	7.44464e+07	7.7103e+07	6.26892e+07	1.38367e+08	1.11937e+08	5.17832e+07	5.47282e+08	3.59389e+08	1262426565	6.49717e+08	1696596032	1258333056	0.0020707	11.182	1.52204	up
V490	Cer 42:4	1234335057	1354417556	330902390	3.1442e+08	7.38119e+08	9.53805e+08	1.16692e+08	1.62909e+08	1.52586e+08	1.53654e+08	1.72992e+08	135507764	0.0039743	0.18156	1.47993	down
V496	DG 36:1	1653985608	1843963926	2597127386	2768076118	2790613283	1392029342	3142459332	2742821524	3538862851	3671450067	5207915910	4026062725	0.0048275	1.7116	2.00824	up
V497	TG O-38:4	9.42091e+07	1.03813e+08	1.42661e+08	1.85997e+08	160226601	7.4491e+07	6.36503e+08	325018930	7.1601e+08	8.9102e+08	8.25163e+08	5.48525e+08	9.9193e-05	5.1776	1.28718	up
V508	Cer 42:2	1236934404	1373122071	8.28981e+08	9.39543e+08	1125621217	8.43815e+08	1.69314e+08	2.28454e+08	1.74136e+08	1.96793e+08	1.25981e+08	2.28271e+08	2.7206e-06	0.1769	1.70361	down
V533	DG 38:6	1893569263	1895425207	1837341864	2263029630	1458461134	1854182730	19295810561	11580973794	20695880046	27025227537	24890849208	17715684756	9.6102e-06	10.82	7.74126	up
V535	TG O-38:6	1.05321e+08	1.52727e+08	1.71993e+08	1.86957e+08	9.74112e+07	1.56031e+08	2116330516	6.86947e+08	1240554507	2770954742	2161617086	2156374535	0.00024122	12.79	2.27553	up
V536	DG 38:6	1.92593e+07	3.14413e+07	5.61989e+07	4.81207e+07	1.65271e+07	3.60768e+07	7.02154e+08	1.38193e+08	2.76477e+08	7.31888e+08	3.92553e+08	6.84433e+08	0.001384	14.091	1.12858	up
V540	TG O-38:5	2.07672e+08	2.55307e+08	2.0033e+08	1.52427e+08	2.69908e+08	1.93204e+08	6.00976e+08	4.44746e+08	6.90185e+08	8.42091e+08	1252981705	3.31239e+08	0.0051643	3.2547	1.12744	up
V541	DG 38:5	7.46652e+07	7.97683e+07	1.23831e+08	1.70728e+08	9.827e+07	5.83083e+07	1134934214	633370068	1277230952	2003024721	1477683839	2232161185	0.00020631	14.463	2.0159	up
V542	DG 38:5	1447267777	1462138585	2138077072	3322488398	2583786228	1153150348	3625138197	3099749640	3283522591	4193931376	3466744694	2874750756	0.0045476	1.6969	2.11576	up
V549	DG 38:4	9.18964e+08	1007139884	1383423438	1814208583	1607576416	6.57427e+08	5177074454	2966826545	6027459371	7270686237	7084323855	4525083713	0.00010434	4.4732	3.65137	up
V552	PEt 31:0	1121580473	1216889952	1018252782	1118889623	7.78935e+08	1192086249	8903837627	5290436591	7973132534	11697065149	10682984460	7077581258	1.4367e-05	8.0081	4.955	up
V554	DG 38:3	6.92294e+08	811298432	9.40098e+08	1092556018	1671584572	5.14238e+08	3292372958	2477468526	4114934964	4532193531	5065747684	4043160735	2.7742e-05	4.1114	3.05444	up
V555	DG 38:5	2.23021e+08	5.95749e+08	481706030	7.22481e+08	4.58964e+08	4.44661e+08	7.42746e+07	1.03779e+07	2.0216e+07	101712698	2939378	3.30554e+07	7.9812e-05	0.082887	1.19096	down
V556	DG 38:5	1.56849e+08	1.70411e+08	2.80996e+08	328754163	8.75201e+07	116106540	1130373364	6.00499e+08	1223393575	1824923368	1318046781	2120782339	0.00035055	7.2048	1.86102	up
V557	DG 38:5	7.05483e+08	8.2617e+08	1027055882	1190576202	1349119382	6.91386e+08	2186451421	1917422547	1974252458	2602693294	2192136284	1311344504	0.00041902	2.1044	1.82919	up
V558	TG O-40:8	2.23723e+08	2.98622e+08	2.92167e+08	3.05035e+08	3.18872e+08	2.49468e+08	1071056866	6.09702e+08	940613976	1290618151	1268507594	753764261	9.4472e-05	3.5158	1.48951	up
V559	DG 38:2	8.07542e+08	9.08031e+08	1051810688	1389495909	1502059395	5.07873e+08	2056725946	1660980908	3275564185	2869609458	3719744919	3655797708	0.00065687	2.7954	2.28299	up
V564	TG O-40:7	1090062085	1200769910	1538119191	1867543943	1788843723	8.14195e+08	5141001368	3085219065	5670669692	6551779781	6492241239	4494652815	4.5426e-05	3.7876	3.49477	up
V565	TG O-40:7	1.882e+08	1.99494e+08	2.91078e+08	3.18979e+08	2.75984e+08	1.26246e+08	9.47532e+08	5.57191e+08	900767258	1446412527	1171044381	1026814532	9.7954e-05	4.3213	1.55285	up
V568	TG O-40:7	8.2884e+07	1.07902e+08	1.36743e+08	1.67101e+08	3.83713e+08	9.43097e+07	8.05133e+08	850178200	8.59654e+08	940032393	6.74313e+08	5.73621e+08	0.00394775	4.8352	1.44442	up
V578	TG O-38:3	7.94278e+08	9.33749e+08	1045252358	1337653701	1754581529	6.6997e+08	4169978774	2801701049	4578158041	4854250704	5586773238	4810043266	1.0316e-05	4.1008	3.27858	up
V582	DG 38:2	1030488834	1128741306	1741554482	2184410191	2309907592	7.50769e+08	3192688987	2364878083	4533221359	3942502696	4868191331	5240670060	0.00068191	2.6397	2.67273	up
V604	DG 40:7	2.8051e+08	3.26206e+08	3.40613e+08	3.87534e+08	1180435744	2.82136e+08	2757869161	2384623040	1887494272	3174255373	1615578144	11509151271	0.00394775	8.3394	2.4898	up
V606	DG 40:7	1946338119	2511180591	2990965790	3504679380	8253832985	2243628408	17397727992	18026703270	17873564439	19515913585	14698111496	11983358490	0.00394775	4.6383	6.60277	up
V608	TG O-40:7	4.28374e+07	5.18483e+07	8.61634e+07	8.3704e+07	1.95891e+08	4.43895e+07	6.01677e+08	7.41048e+08	5.21775e+08	6.74064e+08	2.48671e+08	4.31418e+08	0.00394775	6.3757	1.20189	up
V612	TG O-40:6	1.66166e+08	1.54322e+08	3.89648e+08	5.26017e+08	3.20423e+08	5.97177e+07	1583833619	1613561693	1555590618	2956718909	1654551885	2368141614	0.00394775	7.2588	2.31846	up
V613	DG 40:6	1451255798	1301986006	9.74607e+08	1279914398	1539795675	1087015832	4228152058	3579530684	4629478215	4751682835	5422653660	3958177434	5.1597e-07	3.4802	3.23899	up
V614	DG 40:6	7.37648e+07	7.67582e+07	8.96143e+07	9.63783e+07	1.68302e+08	5.65099e+07	365231394	4.51787e+08	3.62102e+08	4.59859e+08	3.06743e+08	6.13191e+08	3.4113e-05	4.5587	1.01935	up
V615	DG 40:6	5.57387e+08	6.32691e+08	5.27391e+08	6.45791e+08	1200024942	4.44081e+08	1775116893	2587845672	2092646067	2490089893	1674635849	759212100	0.00648531	2.8397	1.90559	up
V622	DG 40:5	3.17599e+08	315565899	799984724	9.65274e+08	8.47162e+08	2.5729e+08	3006606821	3398061942	3661650190	4108944878	3253537068	2789159615	2.9991e-07	5.7718	3.0938	up
V626	DG 40:7	8.31761e+08	1062621677	1296952521	1384815770	3055853097	9.4516e+08	7954479703	7499527378	7326659050	8054174613	6422092088	5707260538	0.00394775	5.0091	4.40946	up
V631	DG 40:4	1.45968e+07	1.30217e+07	5.98376e+07	7.70114e+07	1.91854e+07	7.71174e+06	8.14112e+08	1.69589e+08	9.92561e+08	1050815708	8.5323e+08	1377745617	0.00042525	27.477	1.56776	up
V637	DG 40:6	1594197769	1456312225	1017791815	1263187858	1586839527	1146717904	4927431086	3602164436	4663447353	4987222731	5477717217	4424347597	2.8426e-07	3.482	3.3357	up
V639	DG 40:6	2.73045e+08	3.19278e+08	2.64743e+08	312453865	6.18319e+08	2.52203e+08	1114206840	1224680027	1059269260	1309143219	9.23726e+08	3.59225e+08	0.00648531	2.9363	1.39948	up
V641	TG O-42:8	2.91902e+08	309245176	7.78719e+08	8.83423e+08	7.39704e+08	2.53809e+08	3318698776	3091338017	3218102188	3740655620	3003056280	2684949221	5.8845e-08	5.8514	3.0134	up
V653	DG 40:4	2.16713e+07	1.94802e+07	7.55959e+07	7.90084e+07	5.73671e+07	8.629e+06	8.63413e+08	6.33482e+08	1030113622	1038608222	9.19186e+08	1456961399	7.131e-06	22.7	1.73694	up
V674	SM 34:1	1.12166e+08	1.29871e+08	261392320	3.11495e+08	1.85306e+08	3.20361e+08	9.6644e+08	316558148	2.86867e+08	8.94587e+08	7.39427e+08	8.85299e+08	0.0051057	3.0965	1.0897	up
V676	PC 30:1	9.40443e+08	8.06842e+08	1494904776	1772794832	620922156	9.45212e+08	1.05586e+08	9.62404e+07	1.32027e+08	120868048	1.60472e+08	2.69344e+08	0.00039183	0.13441	1.71022	down
V679	SM 34:0	3.80428e+08	3.46014e+08	5.39361e+08	499403423	4.08479e+08	4.11337e+08	1706906543	1072860234	1030789742	1259860830	1396288556	1291889307	8.946e-06	3.0014	1.66098	up
V682	PC 30:0	1259594306	1277237637	2150918598	2546814673	1209356164	1039906265	5.97279e+08	7.95101e+08	1072788537	8.62612e+08	1311569830	9.91621e+08	0.03872	0.59374	1.33804	down
V705	DG 42:7	2.88596e+08	3.31934e+08	5.06033e+08	6.91073e+08	456199616	2.29114e+08	2214192428	1148161325	1761621784	2284912258	1533552816	1567706303	3.6758e-05	4.1991	2.07569	up
V710	DG 42:7	8.59941e+07	9.87001e+07	1.28389e+08	166508067	219163780	7.3226e+07	7.62981e+08	8.15184e+08	8.79032e+08	9.20228e+08	7.93893e+08	7.57543e+08	2.386e-09	6.3847	1.54566	up
V717	TG O-42:6	7.4618e+07	7.10313e+07	1.46828e+08	2.01845e+08	82226053	4.75074e+07	7.07715e+08	3.50314e+08	6.36698e+08	9.36853e+08	4.9778e+08	7.64044e+08	9.6367e-05	6.2389	1.30744	up
V727	PE 34:2	2163899894	1687952761	4.77304e+08	5.8312e+08	9.27912e+08	1361324749	1.82736e+08	388735452	3.53448e+08	2.64938e+08	4.06158e+08	1.70111e+08	0.0076521	0.24524	1.7127	down
V733	DG 42:7	312560102	3.57358e+08	4.96716e+08	600926140	4.39748e+08	260548623	1874587177	989299657	1412338172	1758262730	1204682437	1297781786	4.2664e-05	3.4593	1.80229	up
V746	TG O-42:6	5.5944e+07	5.83865e+07	1.26231e+08	1.62139e+08	6.29293e+07	4.51038e+07	668018324	290527351	4.76197e+08	7.0318e+08	3.97963e+08	6.57711e+08	9.6888e-05	6.253	1.1788	up
V754	PE O-36:6	5751522983	5442381299	5595526222	4945443819	5307217200	7100374717	4383760782	4218515219	3339837675	3451461317	2711730322	3764479533	0.00040545	0.64054	2.46454	down
V760	SM 36:4	4.13654e+08	4.34295e+08	3.8082e+08	6.35005e+08	3.95074e+08	2.88812e+08	3.88234e+08	1903133951	1605167482	1369776217	7.94388e+08	5.54516e+08	0.023554	2.5966	1.30514	up
V767	Co 8:0	2092663955	2199878127	1881438168	2473534437	3413202105	2003512479	9.50327e+07	1.24406e+08	7.276e+07	7.58213e+07	3.45449e+07	6.87594e+07	1.78e-06	0.033512	2.75745	down
V775	PC 32:2	8465779535	9104806196	9851361971	11557868895	6554811615	9286989967	1699434299	2890269771	2396398060	2243976266	1982357178	3447280356	3.067e-06	0.26741	4.68024	down
V776	PC 32:2	1.75251e+07	3.7626e+07	1.1125e+07	1.75277e+07	9.19607e+07	3.27724e+07	3.67093e+08	9.95871e+08	4.30661e+08	6.01422e+08	301081315	194118185	0.00394775	13.86	1.11917	up
V782	PC 32:1	22966022118	21507686625	16830416210	21916780541	13654233386	18821393603	7470744856	8167042398	13734084329	9481223903	11761718930	10927566946	0.00041	0.53193	5.22429	down
V786	PC 32:0	2554195775	2380051552	1845179717	2395383358	1501381943	2075456814	7.92604e+08	8.66068e+08	1335621697	1044349384	1240609675	1333103491	0.00029801	0.51855	1.7771	down
V797	BMP 36:6	2033034176	1308038204	3.2592e+08	3.84122e+08	7.47322e+08	1337118258	1.45896e+08	1.93032e+08	288859878	1.76988e+08	3.0755e+08	7.18042e+07	0.012445	0.19299	1.64585	down
V823	PE 36:3	1487313241	1397252049	8.29369e+08	8.20683e+08	1212092090	1175389619	3.51543e+08	7.94789e+08	4.80176e+08	382187400	4.72967e+08	300672951	0.00045556	0.40195	1.46461	down
V834	PC 33:2	4543050158	4104474677	3020008845	3459915598	4586818181	3494049078	1052341911	1674623412	889410844	9.75708e+08	8.22632e+08	1238715538	2.5895e-06	0.28668	3.0304	down
V838	Co 8:0	3811255925	4009428326	3327283650	4457043413	6084404008	3582822839	1.91384e+08	2.43478e+08	1.61033e+08	1.57069e+08	8.04743e+07	1.383e+08	1.6495e-06	0.038451	3.68692	down
V845	PC 33:1	3181333015	2418521293	1920034679	2509103779	2089723422	2044494173	6.75157e+08	1131920789	9.95983e+08	8.36221e+08	6.49399e+08	9.65115e+08	2.6574e-05	0.37095	2.18497	down
V850	phSM 36:1	1372583229	1029442131	7.8791e+08	1037813702	8.6026e+08	8.72506e+08	2.6442e+08	5.46396e+08	4.15555e+08	3.45458e+08	2.66577e+08	4.19376e+08	7.8926e-05	0.37879	1.39541	down
V861	PC 34:5	9.00963e+08	9.91068e+08	1187033114	1254615086	8.35292e+08	1385244095	3.6393e+08	5.34072e+08	5.15145e+08	5.20451e+08	5.26402e+08	6.44482e+08	0.00012953	0.47366	1.31508	down
V862	PC 34:5	7.58732e+08	1010527882	7.94094e+08	1036402875	569049185	7.99767e+08	1.78742e+08	2.47662e+08	2.08262e+08	1.72102e+08	1.41513e+08	1.83913e+08	4.8724e-06	0.22787	1.43783	down
V873	PC 34:4	1181005368	9.70556e+08	1060184655	1381533220	3.60663e+08	2.77487e+08	2.49786e+07	5.60537e+07	3.01302e+07	3.00947e+07	1.58816e+07	4.35614e+07	0.001049	0.038364	1.56077	down
V883	PC 34:3	20802713493	23608504309	10702726609	11300118455	11842413419	18275460070	8215249753	4721387250	6452459004	7754765610	7344641065	8357344459	0.0032662	0.44385	5.45003	down
V888	PC 34:2	1135140624	1224043080	1720652672	6.48663e+08	3673171855	4363374400	6.85087e+08	887168179	5.04973e+08	4.92938e+08	4.4866e+08	1632875137	0.037373	0.36441	1.62209	down
V898	BMP 38:8	1313712825	1359277026	1032625478	1280891661	1285038484	1362564744	2.66453e+08	3.56209e+08	3.87472e+08	3.61037e+08	3.29142e+08	241428102	0.00394775	0.25435	1.79274	down
V909	PC 35:6	10200308164	9008040543	5057310521	5276423685	5398531809	5882722825	3038811071	4424786228	4539689306	4617015560	5590179174	2982051380	0.0163092	0.61711	2.72939	down
V910	PC 33:3	5.82164e+08	575697099	4.3133e+08	3.57559e+08	5.76585e+08	4.50554e+08	9.73809e+07	1.87168e+08	1.97569e+08	1.24879e+08	8.17735e+07	8.65302e+07	8.7421e-06	0.2607	1.0914	down
V921	PC 35:5	6.28157e+08	4.7964e+08	308546668	3.46823e+08	3.73509e+08	460034851	9.96938e+07	1.0204e+08	122887366	7.37463e+07	8.40963e+07	1.09396e+08	3.8638e-05	0.22793	1.05759	down
V929	PE 36:2	1140096693	1118951496	2.63243e+08	2.68462e+08	463444472	8.90716e+08	2.95566e+08	3.55928e+08	2.90591e+08	3.0799e+08	3.27174e+08	1.77001e+08	0.040113	0.42323	1.15868	down
V932	WE O-53:13	5.62893e+07	1.33082e+08	1.63389e+08	1.04e+08	5.7555e+07	9.07384e+07	2.88503e+08	5.54931e+08	5.22468e+08	6.14221e+08	5.55474e+08	5.00569e+08	9.3835e-06	5.018	1.15026	up
V973	PC 35:2	7875311520	7171806058	4297872399	5299500437	7263339637	5801903567	1726615532	2844933832	1730567073	1603668631	1370690934	1826959687	0.00394775	0.29444	3.8012	down
V975	PC O-36:2	9.701e+08	1047977445	1047471023	1291309809	7.48358e+08	8.39051e+08	1.27247e+08	1.29267e+08	1.95543e+08	147023359	160605230	1.18331e+08	7.76e-07	0.14771	1.67536	down
V981	PC 35:1	2949552872	2439727152	2822077753	2982758548	2706070547	2335126717	9.86014e+08	1528780026	1291894299	1013504995	8.91463e+08	1286155156	1.0572e-06	0.43102	2.27763	down
V993	PC 36:6	2756089073	3226576043	3109675814	4308778136	2872749152	3214390108	6.05883e+08	9.02355e+08	7.715e+08	7.293e+08	5.64349e+08	9.84173e+08	9.5319e-07	0.23386	2.88521	down
V1012	PC 36:4	1687015648	1592295884	1083539836	1246376752	1236520253	1415331484	3943632218	3543914859	2517568329	2886301374	2455088743	2207102883	0.00036293	2.1249	2.16298	up
V1015	PC 36:4	3052549089	2237119006	2397449126	4047217510	2896147537	2735623113	4678286049	5356277655	6068924656	7738856980	5854273592	5661225110	0.00011997	2.036	3.07844	up
V1027	phSM 39:3	8.05141e+08	801553567	6.8039e+08	7.43234e+08	9.14481e+08	8.7728e+08	1.29098e+08	1.27964e+08	8.03556e+07	8.4395e+07	5.67283e+07	8.17242e+07	3.084e-09	0.11619	1.55617	down
V1030	SM 40:2	4.90853e+08	5.52661e+08	6.52367e+08	7.84091e+08	1029874137	5.78159e+08	2.31873e+08	3.1691e+08	4.21414e+08	3.43066e+08	3.43794e+08	241277614	0.0017007	0.46437	1.06941	down
V1083	PC 37:6	1973168505	1466785043	1076117793	1352885068	1544341662	1390665343	4.91762e+08	6.93055e+08	3.5534e+08	481670182	2.63224e+08	5.49115e+08	2.3888e-05	0.32192	1.79676	down
V1105	Co 9:0	4706872711	4735771732	5408136800	6406691683	4820723532	3914490495	1327829073	2419803117	9.54502e+08	9.66911e+08	5.28361e+08	9.78749e+08	5.1775e-06	0.23926	3.57455	down
V1133	PC 37:2	724035375	6.38929e+08	5.52883e+08	9.26151e+08	7.87022e+08	5.04021e+08	1.51798e+08	3.22355e+08	309480045	2.43054e+08	1.52219e+08	4.65605e+08	0.00042143	0.39789	1.14719	down
V1134	PC 37:2	7.29613e+08	6.13924e+08	3.81714e+08	3.66853e+08	9.1699e+08	6.34939e+08	6.26933e+07	4.848e+07	4.63896e+07	5.46997e+07	3.96588e+07	8.12906e+07	7.6141e-05	0.09144	1.32393	down
V1137	PC 38:8	4.82734e+08	428490527	3.98103e+08	4.48031e+08	7.54733e+08	657969003	1.17884e+08	1.43586e+08	7.00255e+07	1.01395e+08	4.97991e+07	1.41962e+08	3.806e-05	0.19705	1.15651	down
V1138	PC 38:8	4.92628e+08	5.10487e+08	1056627677	1030849983	7.73486e+08	5.18691e+08	1904576401	964093849	1382642284	1280542064	8.10986e+08	2998811450	0.037426	2.1314	1.30478	up
V1141	PC 37:1	6.28191e+08	5.20039e+08	5.38023e+08	672198688	5.83315e+08	4.97085e+08	6.0016e+07	1.2501e+08	8.10817e+07	7.17754e+07	4.58894e+07	6.509e+07	1.1944e-08	0.13053	1.30559	down
V1144	PC 38:7	2.27937e+08	2.88362e+08	3.01482e+08	3.38856e+08	2.97286e+08	2.25519e+08	5.11718e+08	6.13767e+08	6.82463e+08	6.65541e+08	6.25546e+08	5.13452e+08	3.5555e-06	2.151	1.04109	up
V1146	PC 38:7	6126431805	6095085045	3358480925	4266844745	5592139887	5184691466	7.7476e+08	7.54339e+08	9.39946e+08	6.51626e+08	3.1184e+08	6.51788e+08	2.1017e-06	0.13337	3.85064	down
V1150	PC 38:7	17427957421	18370230860	19717530057	21893003967	22482797988	16706274763	3989825907	5759219279	6518929050	4843389463	2641226285	9207601315	1.0949e-06	0.28268	6.89899	down
V1169	PC 38:5	10718407494	10494401464	14855631594	19396774354	17413407162	6225061435	25001454884	24382256486	24383554838	25362115504	26849265673	23758042811	0.00019171	1.8929	6.20493	up
V1170	PC 38:5	7057574334	6369446376	1234085074	1240964695	3185505212	6008140864	1760042148	1952893484	1427414383	2223157531	1662799280	1504522105	0.04881	0.41963	2.89113	down
V1171	PC 38:5	4591478623	3481885942	1420963292	1792380048	1818192271	2903649299	3.89133e+08	1040080543	6.09372e+08	5.04509e+08	4.85198e+08	4.1999e+08	0.00394775	0.2154	2.58533	down
V1172	PC 38:5	2660978308	2430722302	5854857941	8329311763	1719356692	2518718915	6769612969	9723340806	7392341755	9452116177	7500164232	10631017646	0.0036875	2.1889	3.70758	up
V1190	PC 38:4	1387053034	1476202220	1751159218	1954914858	5897962608	1230094611	8799003686	8382914303	8885676651	8390376750	9063388643	3649555456	0.00648531	3.4438	4.10206	up
V1223	PC 38:2	15048024206	13002297615	3654484795	3332592126	6717027477	11804112886	3.48889e+08	2.54087e+08	6.85114e+08	2.92602e+08	4.24134e+08	5.23795e+08	0.0020042	0.047212	5.34371	down
V1241	PC 38:1	1486143768	1237343987	3.80224e+08	4.80389e+08	6.45097e+08	1071644236	4.31017e+07	5.56228e+07	7.92731e+07	5.40593e+07	7.86097e+07	8.27755e+07	0.0011703	0.074223	1.65176	down
V1250	PEt O-44:7	5477065862	5555818931	5724519137	6485836433	5897487625	4479094166	2322759470	3263104063	1969572643	1979849982	1372390253	2040807138	3.0503e-06	0.38514	3.40808	down
V1252	MePC 37:1	7.82025e+08	6.42165e+08	2.30535e+08	2.36052e+08	3.38666e+08	5.46222e+08	2.54973e+07	2.86431e+07	3.71896e+07	2.39378e+07	4.6657e+07	4.27889e+07	0.0010061	0.073753	1.19821	down
V1271	PC 39:6	1801657193	1317886552	6.26678e+08	585282501	1216503188	9.75394e+08	2.69862e+08	4.25169e+08	2.70545e+08	282669657	2.31401e+08	2.64225e+08	0.00394775	0.26733	1.56949	down
V1307	PC 38:7	9.37376e+08	6.84082e+08	5.84256e+08	5.56475e+08	9.21732e+08	9.23451e+08	151960111	1.0419e+08	9.65485e+07	8.8735e+07	5.47139e+07	1.23212e+08	4.5866e-06	0.13443	1.48442	down
V1308	PC 38:7	2371804867	2252828813	2716412298	2182706426	2574908398	2215085892	1273635873	7.40053e+08	1005009797	1212013402	8.94793e+08	1711303439	1.9872e-05	0.47764	2.00625	down
V1312	PC 39:3	6.42921e+08	5.52539e+08	3.96928e+08	4.9241e+08	6.2134e+08	4.18115e+08	3.62458e+07	23549687	4.70752e+07	7.54534e+07	4.86687e+07	4.85082e+07	5.7906e-07	0.089462	1.26265	down
V1317	PC 40:9	1815418320	1997308665	1517298471	1680394647	2828257738	2302804666	7.0663e+08	3.02594e+08	4.24587e+08	381887601	2.09266e+08	5.30417e+08	1.6754e-05	0.21047	2.26406	down
V1318	PC 40:9	7.13783e+08	8.02073e+08	4.88429e+08	7.24765e+08	1218443411	6.03297e+08	132417962	2.68486e+08	111872823	1.11788e+08	4.71827e+07	1.54859e+08	0.00016705	0.18164	1.39275	down
V1319	PC 38:6	7.4943e+08	9.75767e+08	7.97164e+08	7.70365e+08	1004430359	8.85818e+08	1523566032	9.20822e+08	2077957835	1986657181	2255850631	1288250187	0.0037154	1.9396	1.486	up
V1329	PC 40:8	20461446764	19848533244	17384894519	19340110231	23925147615	17851448765	9478650529	10383672612	8418841773	8037601403	4793249243	9376269927	3.5742e-06	0.42494	6.13499	down
V1330	PE 43:8	3.03482e+08	3.2344e+08	4.6605e+08	4.36978e+08	4.78882e+08	2.17019e+08	9.09137e+08	8.41928e+08	1001304907	9.99829e+08	1066773993	816319217	2.2801e-06	2.5317	1.3763	up
V1331	PC 40:8	1765601148	1479625996	2352712702	3040093789	2761822965	1086647103	4818148531	3528914662	4484793140	5138880287	2724077068	4277087515	0.0014527	1.9999	2.54858	up
V1342	PC 40:7	1.6033e+08	1.21802e+08	1.48922e+08	2.46099e+08	1.88394e+08	1.25563e+08	4.63414e+08	4.7192e+08	5.46347e+08	6.00731e+08	6.25939e+08	4.27354e+08	2.7767e-06	3.1638	1.08836	up
V1345	HexCer 42:2	5.7095e+07	7.08186e+07	1.24393e+08	1.30551e+08	8.22564e+07	7.01244e+07	378050834	349921361	3.59072e+08	3.63482e+08	4.28816e+08	562586916	0.00394775	4.5623	1.00504	up
V1361	TG 49:2	6.45118e+08	5.93202e+08	7.34001e+08	9.1634e+08	5.57e+08	6.015e+08	7.39613e+07	7.14782e+07	1.05974e+08	1.12279e+08	2.38378e+08	1.59627e+08	3.7516e-06	0.18821	1.3479	down
V1380	PC 38:2	2737044014	2631948404	9.56665e+08	7.20178e+08	1531107400	2727797013	8.46622e+07	6.12435e+07	1.00221e+08	6.58292e+07	8.87101e+07	1.62795e+08	0.00083631	0.049843	2.45655	down
V1383	PC 40:5	2862902669	2734439657	8.72799e+08	8.94676e+08	1478587265	2306532148	3.33865e+08	7.28157e+08	558098280	4.12409e+08	3.63455e+08	2.98845e+08	0.0035662	0.24169	2.13682	down
V1397	PC 40:4	6433085173	5569311050	2102880841	2243420306	3710045642	4867262391	5.2636e+08	5.01412e+08	6.47035e+08	6.22517e+08	6.85647e+08	6.4192e+08	0.00062879	0.14543	3.44325	down
V1399	PC 40:4	3.89335e+08	5.78029e+08	2.02179e+08	1.75171e+08	3.38971e+08	6.34451e+08	6.12652e+07	4.00866e+07	4.3544e+07	4.18395e+07	5.149e+07	6.64538e+07	0.001475	0.13143	1.03666	down
V1416	PC 40:3	1182026838	9.19268e+08	310864663	3.22681e+08	5.53348e+08	8.65433e+08	9.02076e+07	81653144	1.60663e+08	1.1087e+08	1.38513e+08	1.82128e+08	0.0029794	0.18394	1.37469	down
V1417	PC 40:3	9.84412e+08	1338997480	6.94444e+08	8.76497e+08	1123366036	1161145483	3.27509e+08	3.24558e+08	4.41216e+08	3.41961e+08	402902253	4.43229e+08	4.8443e-05	0.36922	1.45054	down
V1428	MePC 39:3	6.16054e+08	481371500	191537653	2.13208e+08	289174463	4.4668e+08	4.78519e+07	4.49768e+07	8.58364e+07	59183122	7.2515e+07	8.85951e+07	0.0012706	0.17826	1.0119	down
V1430	MGDG 40:9	4.65438e+08	4.35588e+08	3.04452e+08	3.15026e+08	3.57042e+08	2.36524e+08	5.91683e+08	7.2389e+08	9.17866e+08	6.59154e+08	7.13077e+08	5.38798e+08	0.00036532	1.9604	1.00472	up
V1453	TG 51:11	5.04361e+08	6.12315e+08	1210997811	9.87945e+08	6.87134e+08	1105569462	6.79978e+07	1.20795e+08	5.33602e+07	7.69063e+07	2.75454e+07	7.08179e+07	6.1314e-05	0.081714	1.55559	down
V1457	TG 50:4	3806261724	6711428593	7476225036	9470592293	8021284312	6651909953	3034036843	2636490168	4403509801	4714391539	7193978055	3349110073	0.021175	0.60116	2.68817	down
V1467	PC 41:7	6.31342e+08	5.93078e+08	4.14061e+08	4.41341e+08	6.50299e+08	4.86245e+08	1.57077e+08	9.01049e+07	1.46282e+08	1.44539e+08	1.28985e+08	1.60197e+08	3.0943e-06	0.25718	1.15294	down
V1480	PC 41:6	1603001368	1232903172	6.51892e+08	6.73443e+08	1480172045	1138141602	1.06835e+08	1.14442e+08	1.30336e+08	1.16695e+08	1.08919e+08	1.27217e+08	9.8603e-05	0.10391	1.80938	down
V1486	PG O-43:7	4.22705e+08	5.4537e+08	1196338569	8.70529e+08	6.59106e+08	1053782234	6.63423e+07	1.16411e+08	5.00175e+07	6.60167e+07	2.79243e+07	7.31536e+07	0.00015748	0.084221	1.4804	down
V1488	TG 50:4	8.52327e+08	1197109964	1504071603	1680356656	1212240516	1013657651	3.76823e+08	2.38406e+08	4.8393e+08	5.6152e+08	1256079860	5.23209e+08	0.0056666	0.46114	1.35758	down
V1501	PC 40:8	5.52156e+07	5.72458e+07	1.8806e+08	2.08417e+08	1.88202e+08	5.17266e+07	493382948	3.57613e+08	4.70872e+08	5.99233e+08	3.50575e+08	459000526	0.00394775	3.6464	1.04454	up
V1502	PC 42:11	1292682779	1272204405	7.49027e+08	9.20168e+08	1972668919	8.81639e+08	3.66066e+08	3.39683e+08	3.01523e+08	2.50346e+08	1.28451e+08	2.88294e+08	0.00064521	0.23621	1.63651	down
V1511	phSM 44:4	4199325481	4382509411	4722328729	5110049936	4602972931	3726951853	2295026736	2730413404	1791658553	1826864320	1320058256	2008688931	4.4314e-06	0.44768	2.8796	down
V1521	PC 40:7	4.01659e+08	4.55434e+08	6.55588e+08	7.63079e+08	7.44797e+08	3.28121e+08	1166153099	1140224506	1053262349	1171678189	8.77724e+08	1119472782	0.00013777	1.9496	1.33365	up
V1558	TG 51:4	8.25331e+08	9.95525e+08	8.78571e+08	1040568769	1298140819	1085583302	179092077	1.63879e+08	2.27581e+08	2.40967e+08	3.3378e+08	2.23275e+08	7.1487e-07	0.22349	1.62598	down
V1572	PC 40:4	1162718802	1119397512	538911090	5.33232e+08	876924395	1120876582	1.11929e+08	8.34632e+07	1.24235e+08	112285605	1.06633e+08	1.37454e+08	6.9855e-05	0.12631	1.61988	down
V1574	TG 51:3	2228333115	2560514851	2310032458	2785948343	3104414281	2529289306	3.87645e+08	4.17862e+08	5.288e+08	5.55815e+08	9.26449e+08	616339132	1.2322e-07	0.22121	2.61569	down
V1577	TG O-52:3	239448257	4.06288e+08	3.99518e+08	4.41552e+08	4.89116e+08	4.321e+08	2.89907e+06	2.66246e+06	2.79334e+06	6.06076e+06	554548	2.50058e+06	4.6511e-07	0.0072552	1.15549	down
V1589	PC 42:6	5148475453	4423336463	1003448751	9.06537e+08	2903216412	3739976575	1.21868e+08	1.37676e+08	1.65154e+08	1.26146e+08	1.47403e+08	1.2266e+08	0.0025033	0.045292	3.08198	down
V1592	TG 51:2	2049562209	2292212587	2679959450	3030932118	2792563878	2505728052	6.52713e+08	6.73513e+08	891373535	8.11378e+08	1095681593	9.96826e+08	9.5446e-07	0.33363	2.40463	down
V1594	TG O-52:2	2.69546e+08	4.87573e+08	4.47167e+08	5.10843e+08	4.9094e+08	5.04231e+08	4.70929e+06	6.1633e+06	3.70444e+06	7.9422e+06	1.96314e+06	5.5378e+06	0.00394775	0.011076	1.22097	down
V1611	PC 42:5	8.57736e+08	7.1155e+08	2.96697e+08	3.05218e+08	5.31199e+08	6.38372e+08	1.19828e+08	1.77638e+08	1.565e+08	9.74054e+07	1.06735e+08	1.05306e+08	0.00093335	0.22851	1.18446	down
V1615	TG 51:1	4.29001e+08	4.88155e+08	4.25584e+08	4.25084e+08	5.23175e+08	5.35284e+08	1.25484e+08	1.58991e+08	1.29714e+08	1.83304e+08	1.74575e+08	1.60732e+08	8.1003e-08	0.33005	1.02954	down
V1623	TG 51:3	3.87319e+08	3.64041e+08	3.3486e+08	3.59427e+08	3.81516e+08	3.3374e+08	4.28703e+07	2.58505e+07	4.08829e+07	5.06683e+07	1.01241e+08	6.81604e+07	1.0815e-09	0.15256	1.02652	down
V1630	TG 52:7	6.59138e+07	2.65867e+08	5.17015e+08	6.93929e+08	3.30645e+08	3.9198e+08	1497976528	1340211189	1776718109	1514782779	1047636490	9.3583e+08	9.3044e-05	3.5814	1.79489	up
V1638	TG 51:2	4.70214e+08	4.24659e+08	3.87243e+08	4.03352e+08	4.32639e+08	457789228	9.21699e+07	7.3015e+07	9.65896e+07	9.5824e+07	1.54173e+08	1.37027e+08	6.4227e-09	0.25187	1.05277	down
V1666	TG 52:4	34609996475	34306161655	29220928757	32048205993	35795804037	34347418613	14297454124	21323726632	22702394557	26072523206	31173982748	16857822307	0.0017691	0.66105	5.60057	down
V1677	TG 52:5	1222478380	1654579425	1437256554	1715059710	1930853445	1342424023	5.05867e+08	5.34864e+08	6.33268e+08	8.40805e+08	1568485954	5.89475e+08	0.0163092	0.5023	1.46326	down
V1680	d5-TG 52:5	2.80446e+08	4.12822e+08	4.28587e+08	1.34501e+08	6.20737e+08	5.45235e+08	4.09002e+07	5.05214e+07	5.76037e+07	5.5828e+07	6.26504e+07	3.39248e+07	0.00062267	0.12444	1.01114	down
V1690	TG 52:4	3807136769	2732181472	2850462193	2961753560	2595494859	2694656707	1195594429	1335060790	1650232486	1738958686	2653056999	1504696877	0.00648531	0.57124	1.93208	down
V1694	PC 44:12	3244738014	2824256430	2334908514	2525642040	6626268764	1713780408	1745146743	1899193880	1227168143	1160889128	7.40987e+08	1956962185	0.0163092	0.45306	2.04718	down
V1711	PC O-44:4	581509516	5.26817e+08	9.37491e+08	1214508931	5.15655e+08	363002969	1.42332e+08	3.30804e+08	1.55466e+08	148082043	1.4126e+08	1.84373e+08	0.00394775	0.26633	1.26192	down
V1719	TG 52:2	3409370753	3396791646	2529240556	2508415597	3570211501	3272472883	2024119637	2093928278	2073005089	2038951063	1778942077	1850838324	0.00019693	0.63467	1.88473	down
V1720	TG 52:2	2.13043e+08	2.57506e+08	6.88359e+08	1.32195e+08	3.20463e+08	2.6689e+08	9.69769e+08	827550309	1155763947	1145188854	1165526173	3.60934e+08	0.0019616	2.9943	1.34298	up
V1735	PC 42:6	8.93961e+08	7.97441e+08	2.06893e+08	1.47934e+08	6.69433e+08	935685133	1.93735e+07	2.15e+07	2.29447e+07	1.65015e+07	1.56015e+07	1.71539e+07	0.0019332	0.030968	1.38557	down
V1743	SM 48:8	4.05253e+08	4.88688e+08	7.71287e+08	5.58634e+08	4.38137e+08	9.67857e+08	5.33347e+07	1.09072e+08	4.2277e+07	4.34335e+07	1.57665e+07	4.73454e+07	0.00011731	0.085742	1.28352	down
V1750	TG 53:4	1179933998	1296131595	1170595859	1448267934	2133709968	1240175269	4.92356e+08	7.03066e+08	6.55071e+08	6.13767e+08	7.9642e+08	6.03096e+08	0.00394775	0.45624	1.537	down
V1751	TG O-54:4	2.2678e+08	3.61694e+08	3.86476e+08	4.76634e+08	4.19051e+08	3.7881e+08	2.18942e+06	5.35753e+06	1.53607e+06	5.77912e+06	73235.3	2.25782e+06	6.8365e-07	0.0076433	1.12088	down
V1763	TG 53:3	1797497631	2011044952	2559453130	2760735193	3284445366	2377334490	1006668004	1299738448	1428660258	1238677857	1599589356	1267397694	0.00055487	0.53012	1.92543	down
V1777	TG 53:2	9.59804e+08	1217663954	1569207297	1607637825	1792206605	1391208345	4.80779e+08	6.0634e+08	5.93011e+08	6.75628e+08	7.63604e+08	798850634	0.00016078	0.45893	1.58553	down
V1792	TG 54:8	9.9481e+08	2306061938	1738605822	2334054562	4218876695	3020890233	4227668016	4772717545	5441762143	4176171516	2348760038	2855120396	0.041313	1.6302	1.93139	up
V1807	TG 54:7	1347469432	2810277689	4451887545	5706697121	2461460751	2517921696	7550120871	4688808278	8486056614	6908639498	4890238945	9448856522	0.0038913	2.1752	3.26642	up
V1811	TG 54:6	5661631346	7385307333	5069566117	6576942156	7138425092	7287476597	3517886609	6318627861	7.54796e+08	9.13906e+08	6883463612	827698724	0.021756	0.49122	2.7828	down
V1827	TG 54:7	2247440705	2799474251	1187360490	1335828233	2682503470	2872463857	9.0573e+08	8.16127e+08	1125667229	8.56838e+08	1168402270	7.06588e+08	0.0025634	0.42509	1.94695	down
V1840	TG 54:4	7.21447e+07	8.84904e+07	7.30829e+08	8.94679e+08	8.10611e+08	5.40123e+08	1013153439	1501523535	1379354941	1383683729	1176858289	1052799633	0.0015233	2.3933	1.55646	up
V1841	TG 54:4	15298053782	18767826770	20537252270	22847820177	21002713883	16406795157	25847344314	38278609845	32785793929	32429859031	30385256461	28340975897	0.00017438	1.6374	6.30484	up
V1844	TG 54:6	1.8828e+08	2.72822e+08	6.49871e+08	1186730388	145862904	5.64429e+08	5.80316e+07	5.17811e+07	7.08763e+07	8.94225e+07	1.62495e+08	6.43554e+07	0.00648531	0.16521	1.03032	down
V1846	d5-TG 54:6	3.24323e+08	1175038161	1076028889	1289509197	7.49465e+08	1165076571	5.99551e+07	107985024	8.2569e+07	8.5731e+07	3.25281e+08	8.96112e+07	0.00648531	0.12997	1.58161	down
V1847	d5-TG 54:6	3.36597e+07	3.56946e+07	4.91165e+08	2.42546e+08	9.53732e+07	1.84497e+08	6.91589e+08	1079363464	1012227780	8.13664e+08	8.24212e+08	6.85115e+08	4.1959e-05	4.7151	1.48307	up
V1853	TG 54:3	11397259782	13918335950	18717526902	21715207163	16626419068	12446398021	28519368964	35358592604	38320348522	32337314176	31877418349	32598180697	9.3103e-06	2.0988	7.65915	up
V1854	TG 54:3	3.98489e+07	4.61948e+07	1.0529e+08	1.33484e+08	7.61458e+07	5.41685e+07	2.18541e+08	263251255	290591591	3.10346e+08	1633947866	9.71706e+08	0.00394775	8.104	1.00862	up
V1855	TG 54:3	11130398232	3538068759	18188293881	21206753038	16237120184	12195187111	25409122353	34335999393	37608564319	32225755744	31917208776	30643028540	0.00013025	2.3291	7.75359	up
V1858	TG 54:5	1742794525	1683821696	1792810738	1785456843	1513149847	1502064066	4.0549e+08	6.42621e+08	5.42322e+08	6.58243e+08	1754219309	8.04168e+08	0.0249747	0.47974	1.57888	down
V1875	TG 54:1	9.27128e+08	1250217451	4.73942e+08	4.11771e+08	6.2447e+08	1259397150	9.20095e+07	190507493	1.76501e+08	251295726	4.06101e+08	218301974	0.0037186	0.26981	1.40332	down
V1879	TG 54:3	2.79593e+08	1858845589	2107805739	5.42861e+08	4.48515e+08	407380566	3151644020	3507824811	3728175870	3360127912	3202228996	3125487491	0.00394775	3.5563	2.76744	up
V1880	TG 54:3	1818539412	1904964992	2217222796	2281383553	2095470538	1779939721	3239296568	3528310273	3679880442	3386839485	3297456460	3260795137	2.2008e-07	1.6857	2.17878	up
V1881	TG 54:3	2.5338e+07	4.02326e+07	3.31352e+08	4.54989e+08	4.43911e+07	3.1713e+07	9.69006e+08	8.06943e+08	1094655525	1320112578	1646537075	9.52532e+08	0.00394775	7.3165	1.7532	up
V1934	d5-TG 55:5	3.72146e+08	4.63202e+08	8.85888e+08	8.93068e+08	724292574	5.64986e+08	8.98193e+08	7.85847e+08	1040428885	1048519605	1241262613	1081419677	0.0077354	1.5616	1.01957	up
V1937	TG 56:9	2756441102	5785861039	3908896842	5141174618	10810842177	6683246267	10303937529	11026446609	12908881822	11676066339	5385626512	7968049410	0.030522	1.6892	3.15436	up
V1938	PG O-46:2	3.58497e+08	6.35175e+08	4.75491e+08	7.68968e+08	1340813871	9.32869e+08	1550503490	1774099538	1934004891	7326120761	3372662446	4901010016	0.015824	4.6231	2.55425	up
V1958	TG 56:7	10723471315	12708174239	9893014025	12016005505	13180137760	12411522983	18025574710	25125941134	29903618716	17871482694	12776790016	27138710221	0.0044483	1.8446	5.12277	up
V1969	TG 56:6	1014861653	1074899220	1201334903	1521279543	1214843713	1122820495	3220078868	4810901845	3965504013	3031437920	1439939440	2742120532	0.0016609	2.6867	2.43731	up
V1976	d5-TG 56:8	5.33429e+08	5.58336e+08	6.10999e+08	644043070	6.18775e+08	5.92078e+08	1675109969	2419404022	2019963106	1594811157	7.52424e+08	1478526069	0.00091964	2.794	1.78433	up
V1980	TG 56:5	5791408672	7096130231	8750171197	10083293397	7713460630	6994653806	12603693665	14178946230	16868210410	14811295333	10584474981	12190862305	0.00034273	1.7497	4.3642	up
V2002	TG 56:3	2817767794	3802532474	5305586522	5865408327	4016604366	3918371203	5440304357	6250174464	8131093752	8271320820	8432691658	9729601219	0.0014297	1.798	3.13164	up
V2011	d5-TG 56:5	4.14125e+08	5.04267e+08	5.50115e+08	5.86223e+08	6.48824e+08	5.25507e+08	4.57949e+07	7.15553e+07	6.09363e+07	6.12398e+07	8.10022e+07	1.09645e+08	7.2809e-08	0.13322	1.26378	down
V2019	TG 56:2	1100361352	1532952278	8.49909e+08	8.48027e+08	8.98756e+08	1610732981	1.78434e+08	2.67365e+08	3.24651e+08	4.51074e+08	614452691	5.07908e+08	0.00074471	0.34264	1.55004	down
V2033	TG 56:3	9.65206e+08	1091349184	1329916529	1450538106	1138332754	1068264903	1748307886	1726581627	2116806429	2080810985	1872344153	2353438928	6.6888e-05	1.6892	1.60108	up
V2057	TG 58:11	2.31446e+08	3.7103e+08	1.54228e+08	1.85067e+08	3.93759e+08	5.0958e+08	1073202283	1260791259	1661589989	1269518680	200595739	5.05031e+08	0.013089	3.236	1.33448	up
V2059	TG 58:11	2.18771e+08	3.66476e+08	3.59691e+08	4.8842e+08	5.77617e+08	7.72821e+08	3372141723	4391682520	4466026133	3436460436	1240035071	2239350635	0.00036778	6.8775	2.91206	up
V2065	TG 58:10	1816546674	3146087755	2123627926	2820040514	7387792527	3450789930	7234175615	14336668752	7678161729	9343072884	3740771722	5714943282	0.0163092	2.3161	3.37562	up
V2067	TG 58:10	6.35296e+08	8.07033e+08	1026026031	1255919702	8.71778e+08	1648742922	5844920972	6046822278	5084455782	6102075551	2455442214	4208909028	6.6234e-05	4.7628	3.56028	up
V2068	TG 58:10	9.39396e+07	119594890	1.58352e+08	1127255275	140001456	1479070718	5244988080	5426165883	4562577908	8.09074e+08	2137166293	894712406	0.0249747	6.1172	2.53195	up
V2070	TG 60:15	4.81193e+06	4.57098e+06	2.39796e+07	1.72534e+07	3.44141e+07	3.64915e+07	4.93219e+08	4.42203e+08	5.81019e+08	4.29885e+08	1.82525e+08	2.9227e+08	6.7943e-05	19.923	1.11099	up
V2071	TG 58:12	1.24281e+07	3.81596e+07	1.13008e+07	1.52467e+07	4.31256e+07	1.26841e+07	6.1807e+08	5.5414e+08	7.28095e+08	5.38704e+08	2.26923e+08	9.90612e+07	0.00394775	20.798	1.14227	up
V2078	TG 58:9	3692634236	5647151595	6044830586	7891897932	10272419949	5532317323	21408251628	30521403089	22519889799	22543916876	11927952285	18070094167	0.0002583	3.2494	6.81694	up
V2082	TG 58:11	9.99009e+07	1.09352e+08	1.74318e+08	1.81236e+08	1.98145e+08	3.19306e+08	1161530476	1121852887	1155911776	8.79115e+08	5.46212e+08	9.61058e+08	1.5802e-05	5.3829	1.60369	up
V2088	TG 58:8	2813914387	3835446354	5169763611	6598314966	5620947787	3490927436	16772217758	25534386460	19787361541	16381602695	10495962701	17367608539	8.9913e-05	3.8628	6.49145	up
V2091	PG O-48:1	1555168864	1782710512	1588116808	1801686278	2158527093	1465947070	3327931116	7513763438	4023070366	3139699510	1540917843	2795983491	0.037658	2.1581	2.14283	up
V2094	TG 58:10	1.28115e+08	1.35744e+08	2.15275e+08	2.44032e+08	1.20182e+08	3.17084e+08	9.87461e+08	7.17269e+08	744710146	9.29596e+08	4.52871e+08	7.63373e+08	4.3215e-05	3.96	1.36007	up
V2101	TG 58:7	2289253416	2818877606	2062514173	2778355171	2152150722	2460111287	5331550272	10716231735	6378128497	4640167626	1534788044	3740994303	0.04114	2.2211	2.57861	up
V2102	TG 58:7	8.93968e+08	1095116086	1278519109	1465276393	1125025298	1145453602	3360237645	6684273802	4114269998	3708143971	1687981834	3637548146	0.0022947	3.3116	2.78304	up
V2103	TG 58:7	7.99291e+07	1.15228e+08	1.35597e+08	1.3466e+08	719110156	1.53408e+08	2147913569	4272746751	597229079	4.38993e+08	1078949463	5.43229e+08	0.0163092	6.7859	1.58858	up
V2106	TG 58:9	8.88873e+08	1075441370	1265031843	1472981759	1660207098	1033200992	2837828672	2966074643	2759950567	2825180224	2121694154	2771432148	0.00394775	2.2016	2.23469	up
V2112	TG 58:6	1607471761	1963823839	2503250195	2812186741	2047276114	1938983001	4453735761	8033933235	5653888906	5142491813	2533891819	3942492270	0.0046534	2.3119	2.8486	up
V2119	TG 58:5	2.52111e+08	3.79123e+08	1529940162	1702432481	3.4662e+08	3.84753e+08	1496025157	1866715644	2043821234	1977943230	1102879938	2467669496	0.0249747	2.3841	1.77607	up
V2132	TG 58:6	3.11297e+08	3.56011e+08	4.26153e+08	4.55932e+08	3.63414e+08	3.67573e+08	8.32368e+08	1284319916	860387178	8.36205e+08	4.18073e+08	6.92564e+08	0.0036423	2.1593	1.12414	up
V2159	TG 60:13	3.5966e+07	6.42086e+07	1.19176e+08	1.63812e+08	3.1263e+08	1.41009e+08	3485955835	3299467891	3831865459	3042665959	8.42706e+08	1824529863	0.00026579	19.511	2.84367	up
V2165	PG O-50:5	6.90334e+07	1.17326e+08	2.94504e+07	3.7556e+07	2.57448e+08	1.34827e+08	1007885809	1091526761	1147416421	9.72935e+08	2.43469e+08	5.85476e+08	0.00058074	7.8197	1.49549	up
V2166	TG 60:12	3.9594e+08	7.34795e+08	7.46706e+08	9.40633e+08	1236991316	1113137165	16214180867	16933277150	21549991122	15881392392	8601020808	15281060411	5.4026e-06	18.277	7.02051	up
V2167	TG 60:12	3.91776e+08	5.47726e+08	4.68659e+08	6.22534e+08	1242097359	6.30392e+08	4769827934	7862115472	2742989815	4615691311	7.18692e+08	1645657390	0.00648531	5.7274	2.78919	up
V2172	TG 60:11	6.38566e+07	7.25764e+07	1.22836e+08	1.65861e+08	9.78748e+07	103673542	1014037539	1205733556	9.26496e+08	1066329753	4.72312e+08	8.68076e+08	1.2733e-05	8.861	1.64628	up
V2174	TG 60:11	7.16449e+08	1358734470	8.65215e+08	1016375801	2023893245	6.29542e+08	3358932403	5430010125	4347054796	2894829394	1492601931	1990517666	0.0069604	2.9521	2.42356	up
V2175	TG 59:4	4.5423e+08	584553249	6.91387e+08	7.44891e+08	7.13447e+08	5.92738e+08	8.38431e+08	1117621186	1015662935	1040524460	1068064219	8.74991e+08	0.00019075	1.575	1.08699	up
V2177	TG 60:13	1.67365e+07	7.56943e+07	7.79795e+07	1.09779e+08	1.81379e+08	1.06861e+08	1206566430	8.96678e+08	1411251115	1045255149	4.89911e+08	8.79416e+08	4.5569e-05	10.431	1.69734	up
V2181	TG 60:10	4.81062e+08	6.34098e+08	7.2336e+08	8.89505e+08	8.35924e+08	5.82388e+08	6051655557	6844991368	6333827108	5783071671	1989927266	4746463805	8.116e-05	7.6573	3.84051	up
V2182	TG 59:3	389625575	4.78643e+08	761035606	8.26664e+08	6.25251e+08	5.08054e+08	1044627518	1243752210	1358549107	1203571782	1349454515	1132681219	2.672e-05	2.0429	1.44117	up
V2183	TG 60:12	1.7841e+08	2.80535e+08	284432348	3.35933e+08	3.54512e+08	3.61213e+08	2588590474	2063094568	2928905776	2653667943	2047751772	2512651759	3.5365e-08	8.242	2.71877	up
V2184	TG 60:12	1.6135e+08	1.48606e+08	2.13735e+08	1.6337e+08	386255902	2.24763e+08	1182882986	1573712343	1167432021	1101349742	4.74562e+08	9.44143e+08	0.00394775	4.9643	1.63667	up
V2188	TG 60:9	4.86455e+08	6.38585e+08	6.03923e+08	7.73358e+08	9.11168e+08	5.67175e+08	1944286564	2637460329	1998384176	1850800833	9.88835e+08	1777482529	0.00032217	2.8129	1.93422	up
V2189	TG 60:9	1.41031e+08	7.29913e+07	2.25499e+08	2.43187e+08	2.57639e+08	1.86995e+08	1076345548	1262189382	1081017375	9.33012e+08	4.24641e+08	8.6504e+08	9.8118e-05	5.0049	1.55192	up
V2190	TG 60:9	1.18326e+08	6.25672e+07	1.84408e+08	2.07369e+08	2.18981e+08	2.756e+07	9.22629e+08	1081931945	9.0341e+08	7.99765e+08	3.62117e+08	7.23471e+08	9.2401e-05	5.8512	1.45933	up
V2191	TG 60:9	2.14672e+08	249817176	375672355	4.70566e+08	2.02612e+08	2.37915e+08	788893186	1019531335	8.0373e+08	828565460	2.3506e+08	6.06493e+08	0.0050876	2.4453	1.10987	up
V2192	TG 60:9	8.44068e+07	1.10621e+08	1.14758e+08	1.60932e+08	1.72019e+08	1.25429e+08	2215286758	3005077055	2270492459	2108770720	1126623935	2025233252	1.0365e-05	16.6	2.55809	up
V2196	TG 60:11	3.50329e+08	2.27833e+08	1.68361e+08	3.10737e+08	1.22189e+08	1.56555e+08	8.39125e+08	9.55138e+08	1150360385	9.65959e+08	4.21032e+08	7.3528e+08	0.00019037	3.7926	1.39428	up
V2203	TG 60:8	5.34099e+08	5.61777e+08	5.99487e+08	6.94846e+08	8.467e+08	693640119	1466575491	2354123248	1693074579	1323464183	6.82043e+08	1175789711	0.0066246	2.2122	1.47376	up
V2208	TG 60:10	1.15704e+08	1.23458e+08	1.65668e+08	1.72168e+08	1.43508e+08	120348936	9.75233e+08	8.34664e+08	9.5456e+08	8.5451e+08	3.83e+08	8.90617e+08	0.00394775	5.8186	1.47986	up
V2213	TG 60:7	3.10081e+08	3.72241e+08	5.13224e+08	5.58173e+08	4.78147e+08	3.90005e+08	9.63519e+08	1642451459	9.18143e+08	8.16836e+08	3.25164e+08	7.07297e+08	0.029151	2.0495	1.07691	up
V2217	TG 60:9	1.85336e+07	2.68261e+07	2.3213e+07	3.23465e+07	3.31141e+07	2.39542e+07	4.01416e+08	4.12313e+08	3.54713e+08	3.80295e+08	2.26715e+08	3.87892e+08	0.00394775	13.693	1.06056	up
V2242	TG 60:6	1.02218e+08	1.2502e+08	1.71912e+08	195872535	1.08939e+08	2.5489e+08	9.78045e+08	6.96176e+08	6.86104e+08	8.46448e+08	3.91468e+08	7.41788e+08	5.1578e-05	4.5263	1.34329	up
V2264	TG 62:14	2.34793e+08	4.65915e+08	2.66244e+08	3.4553e+08	1760028531	5.10675e+08	7668231222	14253146736	6343377239	7677254319	1410078347	4452190415	0.00648531	11.667	4.18651	up
V2269	TG 62:13	2.35386e+08	4.38071e+08	4.33153e+08	5.96842e+08	1232022747	4.33269e+08	10216381254	14543803724	10133968227	9458487966	3076622435	7485343799	0.00394775	16.301	5.17011	up
V2270	TG 62:13	1.04736e+08	2.06591e+08	100995920	1.41987e+08	5.05613e+08	1.90915e+08	1412304289	4367835151	1659190511	1456638645	3.43167e+08	9.30925e+08	0.00648531	8.1306	1.87278	up
V2273	TG 62:12	3.53982e+07	4.61283e+07	4.79399e+07	6.13716e+07	4.80726e+07	3.43832e+07	1961853768	3461117219	4.46807e+08	4.98574e+08	1.96027e+08	1307266198	0.031439	28.803	1.65086	up
V2274	TG 62:12	4.27689e+07	5.27153e+07	9.85827e+07	1.03869e+08	9.03732e+07	8.83772e+07	1350215753	2285869889	1267468761	1455950923	5.03897e+08	1373371543	0.00023339	17.279	1.99758	up
V2275	TG 62:12	1.69953e+08	235256610	2.34652e+08	3.06786e+08	3.44327e+08	1.80684e+08	2630420100	4640606987	2440498675	2457406732	8.21483e+08	1752818818	0.001598	10.018	2.53554	up
V2277	TG 62:14	136883399	284249479	1.39181e+08	2.04912e+08	9.08738e+08	251606591	2274788377	3324864046	2051341935	2398370406	7.8276e+08	1756804095	0.00648531	6.5378	2.32101	up
V2278	TG 62:11	4.5047e+07	5.25828e+07	5.45374e+07	8.08304e+07	8.24968e+07	4.61894e+07	648183027	1084897431	6.21721e+08	5.64521e+08	2.09448e+08	4.3066e+08	0.0011501	9.8413	1.25289	up
V2279	TG 62:11	7.93744e+07	3.0027e+07	1.06297e+08	1.43102e+08	8.63372e+07	7.67452e+07	1033556387	1696118286	1067501953	991016036	2.64971e+08	8.64031e+08	0.00072867	11.338	1.64379	up
V2281	TG 62:13	105351470	1.52195e+08	1.54383e+08	1.94235e+08	3.69826e+08	1.34289e+08	1806899101	2009784594	1774846944	1644679785	8.60105e+08	1634846448	0.00394775	8.7646	2.17732	up
V2290	TG 62:12	3.3838e+07	4.43577e+07	3.83221e+07	6.25987e+07	65793875	3.08985e+07	4.64356e+08	5.89718e+08	4.24767e+08	4.16982e+08	1.73783e+08	3.4707e+08	8.848e-05	8.7621	1.06551	up
V2323	TG 64:16	1.19543e+07	1.26949e+07	8.49941e+06	1.19618e+07	3.40558e+07	1.70002e+07	9.92143e+08	1779997540	752784595	1071871369	1.31566e+08	5.28856e+08	0.00394775	54.668	1.55095	up
V2325	TG 64:15	1.01237e+07	1.72914e+07	9.87776e+06	1.24597e+07	3.15297e+07	1.7585e+07	8.76586e+08	1289842303	7.61077e+08	8.32727e+08	1.29679e+08	4.47828e+08	0.0014137	43.874	1.44126	up
V2331	TG 64:16	982958	3.24087e+06	6.20527e+06	6.6766e+06	2.00267e+07	1.14649e+07	4.42189e+08	5.04495e+08	3.34937e+08	4.44501e+08	9.22763e+07	3.07564e+08	0.00019262	43.747	1.04128	up
V2333	TG 64:13	2.5271e+07	4.61114e+07	7.52629e+07	9.81935e+07	4.98242e+07	3.76856e+07	6.77073e+08	3.39711e+08	3.75134e+08	5.30957e+08	2.03787e+08	4.47099e+08	0.00025472	7.7442	1.06902	up
V2351	TG 66:18	3.4905e+06	5.04854e+06	4.79727e+06	4.17514e+06	3.37499e+07	8.48524e+06	1447639484	3180601092	1212519865	1595583345	1.74847e+08	7.20403e+08	0.00394775	139.45	1.91333	up
V2354	TG 66:17	3.90421e+06	6.44397e+06	1.75337e+06	3.1689e+06	1.65854e+07	2.6231e+06	3.65212e+08	1333045569	4.3681e+08	438421164	4.95042e+07	2.11278e+08	0.00394775	82.203	1.04364	up
V2360	TG 66:18	2.71316e+06	4.22606e+06	607559	2.33942e+06	1.99812e+07	1.83823e+06	714073561	1301821623	7.03642e+08	8.26605e+08	1.41665e+08	473647802	0.00394775	131.25	1.4229	up
V2395	FA 16:0	2380355953	2572779800	1378425208	1276195133	2667250352	1521761284	8.37583e+08	1323108036	5.89835e+08	1257905160	1478555300	1094372961	0.014429	0.5579	1.50426	down
V2401	FA 17:1	2078718776	1761734390	1815486236	2284827479	3146835746	1021327159	6.29677e+08	8.31639e+08	6.88613e+08	6.81816e+08	796801276	821825519	0.0012655	0.36753	2.00136	down
V2404	FA 17:0	2170846431	1763204382	1685698667	1996356468	2811497521	1139998681	5.17251e+08	6.5857e+08	5.05217e+08	5.26289e+08	4.43986e+08	487175594	0.00011168	0.27132	2.12471	down
V2407	FA 18:4	1471573954	1454447609	4.20564e+08	6.0538e+08	1149325445	7.16953e+08	167217178	2.25934e+08	2.28777e+08	3.74837e+08	3.59303e+08	1.79107e+08	0.003474	0.26386	1.45503	down
V2409	FA 18:3	1386847711	1744849707	989655443	1033310473	1201244428	9.3678e+08	4.262e+08	4.1857e+08	4.1106e+08	4.57721e+08	5.03707e+08	348481529	0.00010195	0.35182	1.58255	down
V2411	FA 18:2	7003929425	6509488440	5397665815	7359628277	9635663607	4252465385	4493595621	5434254540	4227070685	3968876555	4368750102	3470227528	0.013965	0.6465	2.54491	down
V2424	FA 19:0	6.99873e+08	5.86149e+08	452671154	5.36013e+08	1484454947	3.51543e+08	6.94264e+07	7.97339e+07	8.01184e+07	8.16064e+07	6.3876e+07	8.59038e+07	0.00394775	0.11206	1.30028	down
V2425	FA 20:5	1617354269	2710782763	1137295301	1748435270	2443138761	1319802791	1209440012	1392795995	8.92768e+08	5.95574e+08	6.82606e+08	5.14554e+08	0.0088647	0.48172	1.54827	down
V2431	FA 20:2	6114741256	5550224973	6380436507	7894883794	9052059551	2914201397	8312311992	12431870298	9485342373	9450583655	10441462657	11475081468	0.0038541	1.625	3.36582	up
V2432	FA 20:2	9.06678e+08	1009049809	1250778156	1373926300	1299245306	4.76244e+08	2015965035	2380436356	2427988989	2168463963	3082572283	3502079616	0.00020197	2.4664	2.12121	up
V2435	FA 20:0	2485429331	2089809231	7.32757e+08	6.93267e+08	2208003566	1135121790	1.24236e+08	2.20432e+08	1.88277e+08	1.38492e+08	2.01915e+08	1.55987e+08	0.0016724	0.11016	2.04315	down
V2451	FA 22:5	1140290839	9.66352e+08	1118840374	1718515302	1200725872	5.31437e+08	2177563120	2560066418	2077387820	2540345248	1900114086	2814741572	0.00016461	2.1075	1.96738	up
V2453	FA 22:4	5470761035	4157343389	5079151045	6231999082	5421618533	2122204149	8936375446	17395978785	10840909640	12081221750	10739459604	8938521432	0.00075038	2.4201	4.50402	up
V2455	FA 22:3	2.61394e+08	2.33859e+08	8.46996e+08	1005089393	3.3605e+08	9.75452e+07	1325638214	2057087556	2361200385	1809307131	1894559963	4007382538	0.001423	4.8384	2.21015	up
V2462	FA 22:1	2677751580	2228621375	1306266940	1389224389	2545169438	1097230802	3.51534e+08	5.3964e+08	6.17254e+08	4.16567e+08	5.43499e+08	5.20888e+08	0.00068709	0.26586	2.0345	down
V2465	FA 22:0	1567999141	1120490969	3.4242e+08	276205307	9.34571e+08	6.0778e+08	9.96881e+07	1.55506e+08	131727165	8.40737e+07	7.38478e+07	1.17589e+08	0.0063469	0.1366	1.44748	down
V2476	FA 24:5	1.69467e+08	1.95381e+08	4.70488e+08	566964618	295740509	8.76858e+07	2059823636	7.72094e+08	2022236166	3205803434	2092006284	3228392882	0.00047691	7.4929	2.37842	up
V2479	FA 24:4	2.51083e+08	1.84899e+08	5.96075e+08	7.24696e+08	4.39555e+08	1.07683e+08	1452397663	1902041435	7.62455e+08	1255953677	674898244	1124329631	0.0031966	3.1129	1.54778	up
V2487	FA 24:0	1191413438	7.3369e+08	3.09552e+08	3.10219e+08	6.0199e+08	4.874e+08	1.111e+08	1.65101e+08	1.13619e+08	102319702	7.05771e+07	1.11021e+08	0.0045826	0.18538	1.22154	down
V2512	LPE 16:0	3202797145	3244737105	3333850356	3242083031	4406364559	2820012186	1581960624	1418014882	1936638297	1617939778	1806819319	1741785558	0.00394775	0.49893	2.35268	down
V2526	LPE 18:2	1288202953	1260346033	1082647916	1138554711	1671789570	1104763253	3.4178e+08	4.76502e+08	3.23224e+08	2.85372e+08	2.73117e+08	2.74506e+08	0.00394775	0.26165	1.75709	down
V2581	Cer 34:1	6.83954e+08	5.05481e+08	3.42621e+08	4.16424e+08	4.17617e+08	2.58982e+08	9.66723e+08	1717082897	8.8294e+08	1322966526	8.43115e+08	9.44598e+08	0.0012385	2.5437	1.38832	up
V2618	LPC 19:2	7.40579e+08	6.86405e+08	698249782	6.92113e+08	5.70346e+08	5.83212e+08	3.12779e+08	5.02202e+08	3.34384e+08	2.88784e+08	2.17019e+08	302402888	3.664e-05	0.49298	1.02724	down
V2626	Cer 34:1	2009997555	1546301997	1162203049	1401956524	1127724891	8.64958e+08	3388746112	4443003088	3030145629	3799455141	2395934428	3243618291	0.00010042	2.5022	2.51116	up
V2632	SL 33:0+O	9.2629e+08	8.78863e+08	5.53395e+08	1071638901	5.84523e+08	4.51854e+08	1.62456e+08	3.52048e+08	2.89637e+08	1.83574e+08	1.51437e+08	2.0576e+08	0.00061898	0.30111	1.24233	down
V2687	Cer 37:1	7.32788e+08	6.62997e+08	3.48365e+08	4.21274e+08	3.60936e+08	3.99223e+08	1432487583	2552572058	1315192023	1589285535	1639591089	1731272986	8.0326e-05	3.5071	1.93513	up
V2739	Cer 40:2	1033459237	1021950359	3.54555e+08	3.83859e+08	7.44657e+08	7.59742e+08	8.50562e+07	185860176	1.01768e+08	9.32843e+07	7.64397e+07	1.26979e+08	0.00057073	0.15574	1.40094	down
V2741	Cer 40:1	6.85366e+08	680215240	1.84533e+08	1.83337e+08	4.03341e+08	5.53407e+08	6.9869e+07	1.03989e+08	8.94113e+07	8.70655e+07	1.04627e+08	9.05439e+07	0.0034128	0.20278	1.08643	down
V2742	Cer 39:1	5.98442e+08	5.29115e+08	1.58703e+08	1.6492e+08	3.57734e+08	3.51508e+08	4.21364e+07	6.46386e+07	4.45924e+07	5.28655e+07	2.37377e+07	5.3347e+07	0.0017656	0.13021	1.00127	down
V2752	Cer 40:2	2698494217	2579405178	8.98601e+08	9.81598e+08	2169759994	1814190084	1.76759e+08	3.98515e+08	1.90882e+08	2.15399e+08	1.59541e+08	2.59309e+08	0.0004713	0.12569	2.2808	down
V2753	Cer 41:2	2.06666e+08	9.24958e+08	1021017692	1129832652	1030414865	6.36404e+08	2.61725e+08	7.11482e+07	4.48834e+07	4.36444e+07	1.70522e+08	6.12277e+07	0.00062329	0.13197	1.51072	down
V2755	Cer 41:2	1517848215	1808499870	1906169258	2283017760	2650255810	1055259375	1012178240	1293078650	1297521866	1080684539	1031677390	1615139425	0.0256	0.65326	1.43987	down
V2756	Cer 41:2	4.1329e+08	3.767e+08	2.83065e+08	3.57538e+08	4.46371e+08	3.08295e+08	4.39522e+07	5.94942e+07	3.96608e+07	4.79116e+07	2.63212e+07	2.82866e+07	1.8888e-07	0.1124	1.04475	down
V2757	Cer 41:2	8.66317e+08	870647171	9.70436e+08	1065350080	9.81893e+08	5.99036e+08	2.4929e+08	2.76615e+08	2.47008e+08	2.52767e+08	1.62976e+08	3.27325e+08	3.443e-06	0.28317	1.47766	down
V2781	Cer 41:3	1117194085	9.96716e+08	1159312369	1349125522	1234858477	5.70718e+08	7.59884e+08	8.35408e+08	7.2619e+08	8.10987e+08	3.74255e+08	7.53327e+08	0.037373	0.66274	1.04104	down
V2782	Cer 42:2	9.29354e+08	1009879813	6.93063e+08	7.87836e+08	767290550	7.69979e+08	9.18852e+07	1.50413e+08	1.05334e+08	1.07688e+08	8.1717e+07	1.2545e+08	4.8792e-08	0.13364	1.5619	down
V2784	Cer 41:2	1430767272	1209190447	9.28306e+08	1049676762	1327702578	9.4382e+08	6.235e+07	9.88637e+07	6.05978e+07	6.30578e+07	2.63715e+07	8.74007e+07	1.7524e-07	0.057862	1.91569	down
V2786	Cer 42:1	1011947468	9.37003e+08	4.53206e+08	5.14287e+08	6.96824e+08	7.1751e+08	1.02948e+08	1.15662e+08	1.06671e+08	1.06935e+08	6.57538e+07	1.15672e+08	0.00394775	0.14169	1.43651	down
V2799	Cer 42:5	1.86275e+06	2.18561e+06	2.91955e+07	3.52743e+07	6.21555e+06	1.16184e+06	4.332e+08	4.13674e+08	2.65488e+08	4.59036e+08	217926221	3.79258e+08	0.00394775	28.573	1.07209	up
V2808	Cer 43:2	7.83329e+08	6.65623e+08	1.86859e+08	1.98591e+08	1.74469e+08	486556125	8.36396e+07	1.09218e+08	7.37699e+07	9.16991e+07	8.44351e+07	1.03125e+08	0.014259	0.21876	1.03443	down
V2812	Cer 43:1	7.51496e+08	7.01086e+08	3.74643e+08	3.75938e+08	4.95313e+08	6.87685e+08	1.70247e+08	1.95027e+08	1.78232e+08	181983856	1.59006e+08	1.69269e+08	0.00023635	0.3112	1.14068	down
V2815	OAHFA 47:5	8.30864e+08	750635488	5.1502e+08	714842428	6.88527e+08	7.00954e+08	1.73847e+08	2.40544e+08	1.72691e+08	1.90449e+08	130167145	2.11756e+08	4.8996e-07	0.26648	1.31431	down
V2822	PE 34:2	1879301153	1557859474	6.93398e+08	7.816e+08	1265473716	1694287890	2.38711e+08	3.75858e+08	318511062	252588877	351223975	2.5023e+08	0.00050218	0.22703	1.8326	down
V2879	PE 36:3	1039769699	1072197115	7.83743e+08	9.66932e+08	1061340094	1063889261	3.04513e+08	4.48092e+08	3.58437e+08	3.02292e+08	3.52895e+08	2.90116e+08	0.00394775	0.34342	1.48572	down
V2891	LBPA 34:2	1573998759	1463624032	2.32721e+08	1109440807	7.50302e+08	3.23807e+08	1.98468e+08	4.1152e+08	4.61252e+08	5.46686e+08	1.08459e+08	9.74317e+07	0.033194	0.33441	1.1545	down
V2892	PG 34:2	1503961545	1373777481	1071404659	1096141988	9.87309e+08	1420436572	6.13957e+08	3.87028e+08	3.69937e+08	4.57646e+08	3.55126e+08	4.20449e+08	7.7902e-06	0.34941	1.64701	down
V2899	LBPA 34:1	2569841107	2194451489	6.00856e+08	2346048855	1802267269	2274204198	4.68207e+08	1699873580	1481536380	1760774887	5.11995e+08	5.71875e+08	0.0163092	0.55094	1.31354	down
V2930	PE 38:9	8.84375e+08	7.9712e+08	7.27895e+08	7.56649e+08	9.59279e+08	8.10232e+08	1.23856e+08	116330937	1.37621e+08	1.71643e+08	1.36804e+08	1.43281e+08	3.3378e-09	0.16807	1.52954	down
V2936	PE 38:7	9.242e+08	8.19248e+08	178511910	2.54236e+08	3.44532e+08	3.55814e+08	8.74714e+07	1.78899e+08	1.91749e+08	4.47546e+07	3.84823e+07	5.51596e+07	0.015573	0.20737	1.05096	down
V2938	PE 38:6	9570109838	7984375545	5651251412	6636670753	6860269568	7074023469	3566865999	4414546916	4470980642	4162036993	4731267091	3768101440	0.00030842	0.57368	3.15619	down
V2944	PE 38:5	6.71725e+08	4.42842e+08	2.52768e+08	2.23194e+08	2.32305e+08	4.72241e+08	3.06453e+07	5.12382e+07	5.76527e+07	3.20169e+07	4.89143e+07	3.2072e+07	0.00090866	0.11004	1.06109	down
V3013	PE 40:8	4.84676e+08	4.63189e+08	2.6259e+08	353162306	6.37395e+08	3.90113e+08	1.10507e+08	150630995	8.8375e+07	9.72406e+07	7.72738e+07	9.51925e+07	0.00010948	0.23898	1.01325	down
V3016	PE 40:7	3781973806	2952362065	2694653720	3248151424	3611363262	2262991202	2479322270	3506423470	7.82487e+08	7.74255e+08	678971757	2673547532	0.043125	0.58728	1.69569	down
V3104	PC 34:3	3.54842e+08	5.27019e+08	5.10776e+08	5.73527e+08	5.47286e+08	4.81537e+08	1.2655e+08	2.26624e+08	1.50572e+08	1.63789e+08	1.24052e+08	2.92038e+08	1.6975e-05	0.36181	1.02708	down
V3106	PC 35:3	3.3974e+08	5.05326e+08	4.89245e+08	5.49071e+08	527877384	4.61888e+08	1.21361e+08	2.17326e+08	1.44397e+08	1.57073e+08	1.18326e+08	2.79794e+08	1.729e-05	0.36137	1.00629	down
V3111	PC 35:2	1414352007	1223404769	906071130	8.77061e+08	1077583703	1118060659	6.56515e+08	8.46514e+08	661607314	7.01654e+08	6.8535e+08	6.9828e+08	0.00394775	0.64232	1.11872	down
V3113	PS 38:1	1745738209	1517563882	1117255556	1078266679	1347844154	1121830470	6.54325e+08	1024613781	8.11873e+08	8.58736e+08	8.43674e+08	8.38445e+08	0.0023811	0.63463	1.19153	down
V3190	PC 37:4	7.8683e+08	7.01146e+08	7.12115e+08	7.54509e+08	6.65571e+08	5.99442e+08	1001791673	1108991606	1158679548	1226746227	1045984775	1026073311	5.055e-06	1.5566	1.13835	up
V3191	PC 37:4	4.62577e+08	4.72256e+08	3.72192e+08	433565762	5.1306e+08	4.25375e+08	1.38172e+08	2.17894e+08	1.31763e+08	1.34425e+08	9.77074e+07	156658980	3.4682e-07	0.32722	1.00456	down
V3198	PG 42:10	8.28327e+07	7.23059e+07	1.04325e+08	1.15309e+08	1.04986e+08	7.2329e+07	5.79882e+08	6.67223e+08	4.7036e+08	4.33376e+08	2.87267e+08	3.42559e+08	8.6097e-05	5.0366	1.08624	up
V3210	PC 37:2	1202615242	1192308978	1066602918	8.87416e+08	1048905411	1109535736	5.91275e+08	7.2495e+08	6.40831e+08	6.2259e+08	6.0859e+08	6.49611e+08	5.3381e-06	0.58977	1.21948	down
V3213	PG 42:8	2.04792e+08	2.17443e+08	4.01109e+08	4.45487e+08	3.46615e+08	2.34187e+08	6.46105e+08	1242703771	8.43065e+08	7.18583e+08	5.65087e+08	1050799033	0.000822	2.7391	1.26903	up
V3217	PC 37:1	7.2951e+08	7.41458e+08	8.10505e+08	9.187e+08	6.51539e+08	7.57852e+08	1100937688	1088565315	1162756152	1069922568	1218699391	1328073740	2.8267e-05	1.5118	1.10464	up
V3267	LBPA 44:12	4.73757e+08	5.45978e+08	1.53753e+08	6.04868e+08	1356191594	4.10855e+08	1449385916	4322918151	3664716622	3160422765	2608731615	2301960812	0.00041115	4.9383	2.65738	up
V3274	PG 44:11	1.11001e+07	4.52143e+07	1.13491e+08	1.25359e+08	7.23801e+07	4.08654e+07	5.39019e+08	4.86315e+08	4.46658e+08	5.61971e+08	2.85233e+08	6.68453e+08	1.586e-05	7.3153	1.17811	up
V3279	PC 39:4	6.05848e+08	5.57658e+08	563299019	6.38308e+08	5.88893e+08	5.3639e+08	9.7986e+08	9.15371e+08	9.97517e+08	1026613001	9.20086e+08	9.50154e+08	1.5707e-08	1.6587	1.14424	up
V3372	PI 40:6	7.7441e+07	7.77244e+07	6.91398e+07	6.15131e+07	6.80744e+07	9.3021e+07	5.54138e+08	3.49281e+08	3.83581e+08	4.76508e+08	5.92787e+08	4.17234e+08	1.9678e-06	6.206	1.1294	up

## Sheet: FP vs FW
Identification number	Lipid name	FW						FP						Paired comparison
		FW1	FW2	FW3	FW4	FW5	FW6	FP1	FP2	FP3	FP4	FP5	FP6	FP/FW p value	FP/FW FC	FP/FW VIP	FP/FW regulation
V20	CE 0:0	1.25457e+08	1.73796e+08	1.51094e+08	1.42593e+08	1.68716e+08	1.26849e+08	2.45911e+08	4.57819e+08	409333741	276942779	2.64306e+08	6.1222e+08	0.0030379	2.5509	1.18384	up
V71	LPE 16:0	1014193668	1449260349	1287488193	1163344280	1295094247	1156945109	1455329269	6.62153e+08	7.96454e+08	5.79751e+08	7.47851e+08	4.30551e+08	0.017288	0.63425	1.49374	down
V107	LPC 13:0	3.2373e+08	3.26706e+08	3.63959e+08	3.08216e+08	3.16344e+08	3.29559e+08	2.26941e+08	1.30437e+08	1.89765e+08	1.41138e+08	1.23558e+08	1.0727e+08	5.9115e-06	0.46691	1.12324	down
V109	LPC 15:2	5.00744e+08	6.32065e+08	539681457	4.75059e+08	5.88327e+08	592160620	4.50671e+08	2.41754e+08	2.51582e+08	1.67963e+08	2.37279e+08	1.2457e+08	0.00014068	0.44285	1.39124	down
V131	LPE 20:5	3.07518e+08	3.42977e+08	4.52861e+08	3.55121e+08	3.5822e+08	2.21247e+08	1.2538e+08	1.20856e+08	1.67744e+08	9.45224e+07	1.4122e+08	4.787e+07	8.2263e-05	0.3423	1.24605	down
V135	LPE 20:4	1369487386	1485929213	1242603533	1054642826	1545595825	1592319330	1182110465	7.68708e+08	8.12898e+08	6.75394e+08	8.49838e+08	485381111	0.00088181	0.57587	1.87328	down
V159	LPC 17:0	1849612041	2040765463	1808073749	1784014319	3779428021	1954511417	1443278952	1414110310	1526691938	1248599573	1556620829	1381090495	0.00394775	0.64847	1.99653	down
V170	LPC 18:3	14835494307	17952244278	24403288154	19472899386	17806248012	17953606088	7542805113	13172570108	11905304672	10500791405	15938611676	10140865140	0.0020334	0.61554	6.61373	down
V193	LPC 17:0	4583198299	5452603794	4435956368	3617261619	9359403521	5206495163	3899506030	2939073600	3062371037	2235487418	2790050984	1986848835	0.013064	0.51794	3.82149	down
V210	LPC 20:5	5656608028	3968203974	5373901149	5065399030	6381412867	5346514524	2359333946	2595427665	3369270999	2683375064	2972438926	3941042539	0.00018209	0.56369	4.13066	down
V213	LPC 20:5	4040756281	2759403115	4279958053	3078325602	4174270391	1859208630	1432323030	2092888157	3090937128	1620343112	2334176987	1400394742	0.016453	0.59286	2.84831	down
V226	LPC 20:1	8.18163e+08	6.02068e+08	7.3969e+08	6.52301e+08	1221526619	8.42036e+08	1373349931	1915822571	1519746765	1790733656	2116412350	9.38766e+08	0.0021982	1.9802	2.36458	up
V250	LPC 20:5	1218364385	7.22339e+08	1151870347	8.87512e+08	1133993142	534792788	3.20573e+08	5.59305e+08	8.27308e+08	4.78731e+08	6.44663e+08	3.99231e+08	0.013221	0.57176	1.55416	down
V267	LPC 22:5	2.30034e+08	1.66644e+08	1.86879e+08	1.76853e+08	2.76324e+08	1.27267e+08	3309410643	808283899	8.89096e+08	1422451075	1114082116	1416488109	0.00394775	7.6974	2.63114	up
V271	LPC 20:1	6.8548e+08	1454910240	1174611185	7.20898e+08	1164194610	1189192109	4103242551	5119263047	3265609303	2066975739	3034092894	1190799936	0.0054575	2.9393	3.83155	up
V272	LPC 22:4	1.89287e+08	196816456	1.52974e+08	1.60905e+08	1.24324e+08	1.69327e+08	3.74549e+08	3.53434e+08	3.79521e+08	3.04433e+08	3.61819e+08	4.65888e+08	5.9412e-06	2.254	1.2163	up
V318	LPC 22:6	5.01763e+08	3.51215e+08	414546436	1.27037e+08	6.25992e+08	5.92601e+08	2.90714e+08	1.55519e+08	2.36541e+08	1.51674e+08	2.9595e+08	1.10187e+08	0.018497	0.47475	1.12923	down
V355	Cer 40:2	1.83258e+08	2.09757e+08	1.7776e+08	1.62624e+08	1.94056e+08	1.99289e+08	1300794681	6.82026e+08	6.40857e+08	5.21591e+08	441947796	6.59273e+08	0.00394775	3.7688	1.75865	up
V371	DG 34:2	5560497424	6364038306	5387562577	3845994678	6695974555	6341924304	6517323929	4539524336	3589357644	2599959308	2982833675	1204289525	0.032039	0.62678	3.18173	down
V386	TG 33:2	1.34793e+08	3.4031e+08	2.83471e+08	1.60519e+08	5.38502e+08	1.35901e+08	7.81125e+07	1104783704	1459074066	6.86671e+08	1913315103	3.77614e+08	0.042198	3.5266	1.85252	up
V389	DG 36:5	4254048970	4238059794	4191343212	3134724778	6100844172	6646409400	4430678103	3201483845	2498050304	2359959661	2492903418	1218732418	0.014167	0.56718	3.43075	down
V393	Cer 41:2	2.68419e+08	248182828	3.12967e+08	2.67986e+08	332038780	2.4714e+08	1.77411e+08	8.65824e+07	4.88191e+07	9.73376e+07	8.78455e+07	1.03057e+08	1.1959e-05	0.35847	1.11921	down
V399	TG O-36:4	3.80857e+08	4.74316e+08	3.67315e+08	2.85124e+08	9.19661e+08	7.69733e+08	279004634	2.06476e+08	2.32395e+08	1.50485e+08	1.91358e+08	8.77485e+07	0.0095814	0.35892	1.42373	down
V408	LPC O-27:8	9.7988e+08	1504856670	1250095133	2.72558e+08	1298467363	2045852145	2195840761	2206187733	1731405492	2901663416	2665475710	1995446346	0.0052292	1.863	2.63344	up
V411	Cer 40:2	191067657	2.09509e+08	1.30864e+08	1.93453e+08	2.15617e+08	213671870	1417989775	7.42825e+08	7.05125e+08	5.6798e+08	5.12436e+08	719240195	0.00394775	4.0423	1.88116	up
V457	TG O-36:4	3.32258e+08	2.88588e+08	2.96635e+08	1.41904e+08	4.36468e+08	5.3326e+08	1.70724e+08	1.2409e+08	1.41547e+08	1.11046e+08	8.08953e+07	5.2349e+07	0.0029439	0.33544	1.16638	down
V459	TG O-36:4	3059262004	3622196080	2882957742	2182902305	6717551084	6330855361	2050799002	1622081980	1925572404	1132430986	1401454585	6.20841e+08	0.0080165	0.35301	4.0099	down
V460	Cer 41:2	327528191	3.37382e+08	4.00923e+08	3.35394e+08	4.21482e+08	3.07171e+08	2.31357e+08	1.1277e+08	6.07383e+07	1.14092e+08	1.04701e+08	131443867	1.6059e-05	0.35453	1.25335	down
V473	DG 36:2	2678427754	2335990533	7014115088	922827539	8513035677	8023536673	1213198599	2221883734	1173689481	1435034740	1359632763	7.922e+08	0.026328	0.27793	4.54665	down
V474	TG O-38:7	4.6025e+08	4.12282e+08	2.8416e+08	2.21157e+08	3.85936e+08	4.83651e+08	2.97256e+08	1.17671e+08	1.34392e+08	9.75805e+07	1.63606e+08	8.23768e+07	0.0015792	0.39729	1.10963	down
V475	DG 36:4	8.94503e+08	7.49192e+08	7.39408e+08	5.85279e+08	1274312790	1432261094	380024260	6.02767e+08	5.57551e+08	5.88201e+08	5.54624e+08	4.1675e+08	0.012724	0.54625	1.55662	down
V483	Cer 42:5	3.45895e+08	3.35261e+08	342198790	3.26901e+08	312433591	3.56492e+08	1616067935	8.54726e+08	8.84418e+08	7.89614e+08	6.23769e+08	1069539865	0.0011517	2.8913	1.94133	up
V540	TG O-38:5	4.26058e+08	314954053	4.5143e+08	2.61937e+08	8.79183e+08	5.48185e+08	2.28691e+08	173121772	7.5473e+07	130872785	4.01212e+07	1.06969e+08	0.0036812	0.26208	1.47313	down
V548	TG O-38:4	1.68596e+08	1.48695e+08	1.28136e+08	1.07247e+08	1.43213e+08	1.04796e+08	2.83568e+08	3.04166e+08	2.26493e+08	4.27778e+08	4.50567e+08	1.16802e+08	0.0090404	2.2598	1.03958	up
V559	DG 38:2	4.6474e+08	5.88204e+08	3.36345e+08	303131771	4.71426e+08	4.5874e+08	1979943958	1773476000	7.23353e+08	1377569981	1214294630	272600837	0.014092	2.7992	2.33297	up
V582	DG 38:2	7.42781e+08	7.96027e+08	5.01498e+08	503609556	663566872	7.16777e+08	2342643095	1919005427	9.43244e+08	2450877039	1649225460	659548870	0.0076916	2.5392	2.59672	up
V612	TG O-40:6	118515334	1.15405e+08	1.28601e+08	8.10943e+07	1.65204e+08	1.54807e+08	1487014611	4.6358e+08	4.22918e+08	6.15862e+08	6.78556e+08	2.9143e+08	0.012481	5.1849	1.71107	up
V615	DG 40:6	1083429940	1138224069	1539261827	9.14056e+08	1954786593	1679516651	1369378861	8.01293e+08	5.88973e+08	6.1042e+08	6.22496e+08	2.02143e+08	0.012777	0.50482	2.0423	down
V622	DG 40:5	7.08637e+08	6.17017e+08	655330337	4.1199e+08	792477152	9.82653e+08	1969993217	1883863557	1427100035	1676217760	1356334521	8.02134e+08	0.0015	2.187	2.44453	up
V629	DG 40:4	2.1392e+08	2.24975e+08	1.94882e+08	1.49678e+08	1.52953e+08	1.97888e+08	6.14468e+08	6.63238e+08	4.12942e+08	5.17581e+08	4.0691e+08	2.65703e+08	0.00080636	2.5398	1.4579	up
V639	DG 40:6	5.62307e+08	5.14181e+08	7.22706e+08	4.46483e+08	9.66758e+08	9.03244e+08	5.67902e+08	2.85456e+08	243426751	2.78126e+08	2.98402e+08	1.67415e+08	0.0044124	0.44725	1.55004	down
V641	TG O-42:8	7.81566e+08	5.82367e+08	6.26408e+08	4.52883e+08	8.36626e+08	8.00958e+08	1579070455	1428381924	9.09819e+08	1619667006	1099168897	8.61233e+08	0.0035865	1.8372	1.95106	up
V652	TG O-42:7	3.19928e+08	2.44378e+08	2.39345e+08	182500055	2.26249e+08	3.27821e+08	6.9899e+08	6.64258e+08	4.81086e+08	7.04993e+08	4.76595e+08	3.42024e+08	0.00088557	2.1867	1.46311	up
V767	Co 8:0	2224878677	2992667899	3444387534	2854545013	3237600773	2736760178	1055904069	1225187954	1290835623	2160014714	2214696949	1762678462	0.00067696	0.55511	2.87163	down
V780	SM 36:1	368660872	5.16362e+08	4.34998e+08	3.91513e+08	3.05957e+08	3.48839e+08	1.04907e+08	1.68849e+08	2.52023e+08	1.95012e+08	2.78947e+08	1.02868e+08	0.00056337	0.46596	1.11184	down
V797	BMP 36:6	1024448631	1398935092	1390047274	1852887351	6.42198e+08	4.49199e+08	3.33998e+08	3.30827e+08	5.65209e+08	2.12295e+08	3.33028e+08	1.40447e+08	0.0045828	0.2835	2.17496	down
V823	PE 36:3	7.15489e+08	1116010673	9.70525e+08	1218500599	8.49223e+08	952461827	7.26947e+08	5.71542e+08	7.12491e+08	3.2468e+08	6.23177e+08	3.10874e+08	0.0023941	0.56159	1.57781	down
V835	PE 36:2	584246706	9.20616e+08	7.69314e+08	7.13002e+08	6.75579e+08	6.6454e+08	6.55953e+08	4.89093e+08	6.84232e+08	2.65996e+08	3.69867e+08	230700843	0.014319	0.62298	1.1835	down
V838	Co 8:0	3813527651	5588075070	6068415221	5295699381	5968314929	4921602521	1995086840	2220628623	2511952519	3838072983	4074514695	3145380327	0.00081618	0.56185	3.81491	down
V929	PE 36:2	8.79425e+08	6.67337e+08	1084109958	1058746562	8.35022e+08	4.31316e+08	4.7839e+08	2.96577e+08	4.68277e+08	2.59261e+08	3.17436e+08	2.63108e+08	0.001329	0.42031	1.81363	down
V975	PC O-36:2	7.11329e+08	9.23498e+08	9.72632e+08	930145827	1352185281	1311837916	1.09061e+08	1.94843e+08	1.37667e+08	181303875	1.5397e+08	2.15869e+08	7.3079e-06	0.16007	2.47271	down
V1000	PC 36:5	5.38361e+08	7.98466e+08	6.61968e+08	6.12622e+08	6.77148e+08	681787577	6.48313e+08	4.04839e+08	4.51196e+08	2.91785e+08	3.54749e+08	3.47024e+08	0.0027636	0.62914	1.15478	down
V1024	PC 36:3	1344059894	1589748059	1256812405	2147131867	1534871760	8.91273e+08	7170218345	3741186548	4518565613	3497375319	4283629659	5158530613	0.00019001	3.2371	4.5161	up
V1027	phSM 39:3	7.6613e+08	8.21816e+08	1098170999	8.92384e+08	8.83444e+08	8.89606e+08	4.60733e+08	480400005	5.45326e+08	6.03347e+08	6.57037e+08	352420783	0.00015795	0.57913	1.62713	down
V1030	SM 40:2	288309903	3.83385e+08	3.46922e+08	3.65913e+08	3.22655e+08	3.42669e+08	9.5015e+08	5.00955e+08	733407670	4.42059e+08	5.99418e+08	3.77863e+08	0.014348	1.7581	1.16381	up
V1105	Co 9:0	5626517863	6747951074	6172494521	6317743480	6427674501	4988532487	3935404420	3002432730	3502082499	3958948917	3588703412	5364879115	0.0004259	0.64366	3.86515	down
V1129	SM 41:2	2.08838e+08	2.51436e+08	3.34305e+08	3.38336e+08	2.86115e+08	1.51534e+08	3.52003e+07	3.35727e+07	3.55654e+07	4.96896e+07	7.89919e+07	7.73134e+07	0.00394775	0.19759	1.22233	down
V1137	PC 38:8	3.31966e+08	3.11013e+08	5.10566e+08	6.38354e+08	9.0655e+08	5.9798e+08	286291326	1.80337e+08	2.0713e+08	1.98123e+08	2.27508e+08	2.24829e+08	0.0048495	0.40171	1.47924	down
V1138	PC 38:8	554623935	6.17299e+08	7.85814e+08	7.12869e+08	5.84229e+08	4.71586e+08	8.16038e+08	1101703917	7.53226e+08	1147666175	1206837387	1209068369	0.0012872	1.6731	1.64375	up
V1139	PC 36:5	2872701192	2624910543	3135786548	3246433090	2374655579	2121893402	1302575423	1421679414	3140670423	1881698252	1345069578	1555690800	0.037373	0.65017	2.44941	down
V1145	PC 38:7	1994660541	1804672186	2485487065	2299862576	2160399177	1848990355	2881043216	5613129552	4493528814	6617188881	3228325899	3632532664	0.0034018	2.1014	3.67188	up
V1146	PC 38:7	4266691812	2728150484	7313904097	7410612311	6537035133	2738816209	1190363230	2764124808	3624169277	1746600983	3257886961	3875269992	0.035647	0.531	3.83014	down
V1154	PC 36:3	1.48164e+08	8.97419e+07	9.656e+07	1.33445e+08	1.33309e+08	1.26103e+08	6.74369e+08	2.41641e+08	2.41846e+08	3.02949e+08	1.87966e+08	3.48574e+08	0.00394775	2.7462	1.01159	up
V1169	PC 38:5	11862420740	16384228494	15848490410	13481421417	13579925750	13493357297	17750317566	47278065037	21832274552	22968874064	26465601139	23970480114	0.00394775	1.8933	8.95361	up
V1170	PC 38:5	10192148071	8090482397	12594203507	12186945100	8287132792	5469544971	1170907883	4807036270	11870699991	1895413013	1469902476	1546366508	0.0249747	0.40057	5.84756	down
V1171	PC 38:5	1759760332	1557776408	2547074284	2810683970	2289640647	1175665315	1728670136	7.63532e+08	6.09655e+08	5.17407e+08	5.22271e+08	8.35534e+08	0.0104056	0.40995	2.75151	down
V1172	PC 38:5	3661007036	2644499190	3422942341	3580087532	2799451444	1992124280	10395627008	3185906635	4415841850	8662222055	8103579894	12807974172	0.0083412	2.6282	5.27361	up
V1193	PE 41:4	1051003082	6.06989e+08	9.10651e+08	7.53632e+08	4.88856e+08	5.31233e+08	2097928980	2397912868	1112413326	1000463906	2067905346	2716578057	0.002747	2.6237	2.81407	up
V1195	MePC 37:4	8.87217e+08	3160321696	3525305970	3199963595	3207743448	3471779986	2460065214	810239777	2432255117	9.13473e+08	2150031361	1896779726	0.037373	0.61097	2.43366	down
V1215	SM 42:2	3.46754e+08	3.89865e+08	5.0262e+08	4.74597e+08	3.55453e+08	3.53885e+08	2.26993e+08	1.46993e+08	157466323	1.87579e+08	2.18277e+08	2.29315e+08	5.5604e-05	0.48144	1.22624	down
V1220	PG 38:5	152157026	2.83714e+08	2.50702e+08	1.85072e+08	1.87594e+08	1.3509e+08	2.54771e+08	6.25188e+08	5.90341e+08	3.91277e+08	6.0986e+08	523441221	0.00090576	2.5076	1.38537	up
V1240	PC 38:1	6.22158e+08	7.06678e+08	7.02489e+08	8.60784e+08	5.70669e+08	5.03336e+08	7.60659e+08	1440692022	1217633875	9.61176e+08	9.85917e+08	1418338584	0.0033197	1.7106	1.68709	up
V1243	TG 48:4	4.40928e+08	1.54342e+08	6.37195e+08	6.28238e+08	5.62878e+08	3.46467e+08	4.99932e+07	2.28839e+08	3.02749e+08	8.42076e+07	1.54507e+08	4.74354e+07	0.0047552	0.31326	1.48513	down
V1271	PC 39:6	8.23051e+08	1190238020	1097718077	1204347708	1451752943	1126262326	9.04185e+08	5.28405e+08	6.74616e+08	4.63043e+08	5.06995e+08	5.26203e+08	0.00044009	0.52274	1.90641	down
V1287	PC O-40:5	2.4389e+08	1.66884e+08	213248410	2.20304e+08	3.92219e+07	2.79667e+08	2.03628e+08	422817801	4.37238e+08	3.05206e+08	330850302	837585667	0.038718	2.1813	1.14515	up
V1307	PC 38:7	9.82543e+08	4.74466e+08	1005597068	1045114952	1071305159	5.91266e+08	2.44515e+08	4.12775e+08	4.24464e+08	3.61135e+08	4.83687e+08	5.31959e+08	0.0104056	0.47551	1.76486	down
V1327	PC 38:5	2.40127e+08	138510271	2.062e+08	1.70301e+08	167912220	1.34485e+08	6.30986e+08	3.7991e+08	4.3577e+08	533938322	4.15588e+08	7.76845e+08	0.00026671	3.0004	1.49659	up
V1331	PC 40:8	2240480528	3553865860	2191688937	1443969971	3077166257	3542025260	3498159527	6962424470	4317100504	4660468041	6073356804	4820483889	0.0032201	1.8899	4.11831	up
V1347	SM 44:6	4.79609e+08	466991553	6.6841e+08	7.73626e+08	6.31117e+08	5.54297e+08	2.07372e+08	2.89057e+08	3.47078e+08	3.54805e+08	4.63261e+08	6.17838e+08	0.017566	0.63777	1.19031	down
V1354	PC 38:3	5.82284e+08	4.48018e+08	9.7083e+08	6.24369e+08	4.47081e+08	3.91296e+08	8.68888e+08	1404215627	1401448701	1706302072	1054883656	1572546019	0.00064825	2.3119	2.09242	up
V1365	MePC 39:6	1.95294e+08	277366570	3.31681e+08	3.15204e+08	3.50428e+08	3.87792e+08	5.08528e+08	9.92464e+08	5.66481e+08	471079351	4.77597e+08	485327220	0.00394775	1.8848	1.3133	up
V1381	PC 40:5	5.29484e+08	4.47064e+08	6.68886e+08	792639370	6.64537e+08	5.99862e+08	4.99905e+08	1278680180	9.92066e+08	1228208365	9.95951e+08	8.91273e+08	0.014989	1.5898	1.35492	up
V1382	PC 40:5	2.15232e+08	1.29443e+08	1.57845e+08	1.80917e+08	1.39825e+08	1.21349e+08	2.77823e+08	3.13562e+08	4.0424e+08	6.46145e+08	3.24569e+08	4.38063e+08	0.0015827	2.5454	1.15767	up
V1383	PC 40:5	2284386610	1873199728	3256207805	2644024283	2443252532	1221034211	1382767325	7.22222e+08	716969341	5.81378e+08	6.95721e+08	6.68312e+08	0.00648531	0.34742	3.1818	down
V1384	PC 40:5	3.6955e+08	5.40711e+08	6.46311e+08	6.4082e+08	4.9328e+08	3.93915e+08	1106888693	2304264989	1589345540	1165665747	1344708497	9.47415e+08	0.0014436	2.7421	2.45954	up
V1406	SM 45:10	1.60488e+08	1.5263e+08	2.48715e+08	2.9321e+08	3.74625e+08	2.58243e+08	8.98834e+07	6.77435e+07	8.99479e+07	6.09828e+07	9.96216e+07	1.19072e+08	0.001062	0.35436	1.05878	down
V1417	PC 40:3	2.54321e+08	2.83347e+08	3.02932e+08	3.20877e+08	2.87422e+08	276860602	5.72813e+08	5.44193e+08	4.25871e+08	4.65749e+08	4.01192e+08	3.77974e+08	0.0003552	1.6154	1.10314	up
V1418	TG 50:6	3.56099e+08	3.85152e+08	5.21374e+08	4.61529e+08	4.79429e+08	3.24258e+08	1.55151e+08	3.00213e+08	3.34502e+08	1.90573e+08	1.56067e+08	9.93578e+07	0.0013489	0.4889	1.20114	down
V1419	TG 50:6	2.23123e+08	5.83847e+07	3.27777e+08	3.95416e+08	4.23754e+08	2.28773e+08	1.74316e+07	2.46622e+07	3.70979e+07	1.92191e+07	3.96045e+07	1.24482e+07	0.0010736	0.090792	1.34789	down
V1420	TG 50:6	2.26174e+08	5.16017e+07	3.33645e+08	3.99142e+08	4.28408e+08	2.322e+08	1.42336e+07	2.02157e+07	3.00345e+07	1.63318e+07	3.99843e+07	10021976	0.0011196	0.078282	1.36196	down
V1435	PC 40:2	8.62563e+07	1.21776e+08	9.76011e+07	1.13114e+08	8.25861e+07	8.55113e+07	2.46645e+08	260305700	2.36617e+08	2.18417e+08	2.22335e+08	2.80475e+08	1.9786e-07	2.4961	1.03936	up
V1436	TG 50:5	9.31313e+08	5.65931e+08	659044255	678822884	5.20836e+08	4.58358e+08	4.17223e+08	2.49516e+08	3.01144e+08	4.56819e+08	1.96375e+08	4.377e+07	0.0029759	0.43647	1.44913	down
V1437	TG 50:5	7.95481e+08	4.8339e+08	4.35526e+08	4.7627e+08	3.15524e+08	2.72661e+08	3.48564e+08	1.20402e+08	2.06384e+08	9.74658e+07	9.11855e+07	6.69576e+07	0.0053035	0.33502	1.30894	down
V1439	TG 50:5	1521176441	6.90714e+08	3138670552	3154425349	2945437722	1991284786	1.40095e+08	9.87142e+08	1062348289	5.43097e+08	7.37425e+08	1.46671e+08	0.0042097	0.26907	3.38682	down
V1453	TG 51:11	1639139009	2829697595	2442226140	1947966579	1759162555	1016921630	4.66895e+08	7.01339e+08	8.21713e+08	9.02091e+08	8.32566e+08	6.3494e+08	0.0010863	0.37469	2.6315	down
V1455	TG 50:4	2.71818e+08	1.20315e+08	5.71759e+08	5.66873e+08	5.25585e+08	367224030	2.33098e+07	1.5864e+08	2.06006e+08	1.02321e+08	1.3642e+08	2.36157e+07	0.0044192	0.26833	1.44693	down
V1477	TG 50:5	5.05755e+08	333481487	4.80581e+08	5.39647e+08	3.85708e+08	3.38635e+08	1.54721e+08	2.85559e+08	2.96926e+08	1.78754e+08	1.98407e+08	5.23928e+07	0.0010554	0.45157	1.24401	down
V1480	PC 41:6	3.76044e+08	528484892	6.42715e+08	6.30081e+08	6.47263e+08	472589635	5.1856e+08	285492028	3.55534e+08	2.84885e+08	2.99526e+08	3.04032e+08	0.0104056	0.62115	1.14253	down
V1485	PG O-41:4	3.58615e+08	467769588	4.30938e+08	2.95895e+08	3.08991e+08	1.9454e+08	7.67148e+07	1.0002e+08	1.34303e+08	1.51972e+08	1.37827e+08	1.37924e+08	0.00038753	0.35919	1.16084	down
V1486	PG O-43:7	1506951389	2070238552	1973418844	1641815943	1455255338	962969836	3.73883e+08	4.97379e+08	6.25547e+08	8.11114e+08	6.47214e+08	572290823	0.00016563	0.36703	2.54523	down
V1501	PC 40:8	1.03531e+08	2.4004e+08	6.62211e+07	5.35497e+07	2.26326e+08	3.72045e+08	2.73148e+08	4.36657e+08	2.5734e+08	3.71969e+08	4.06679e+08	2.90381e+08	0.02108	1.9178	1.0385	up
V1551	PC 40:5	2.15325e+08	153282739	211158396	223476872	165937117	1.26853e+08	7.43033e+08	3.90782e+08	4.68353e+08	6.70626e+08	4.79782e+08	7.07892e+08	8.853e-05	3.1573	1.57824	up
V1558	TG 51:4	1152926670	9.83466e+08	1205569705	1585527304	1201730035	1072791373	8.12533e+08	9.37466e+08	9.58465e+08	5.2614e+08	6.38175e+08	3.21704e+08	0.0035897	0.5824	1.78858	down
V1574	TG 51:3	2302882170	2132684407	2374835294	3343774967	2145238490	2052786934	2161250788	1907471306	2008461221	1197141408	1518563667	7.58964e+08	0.0163092	0.66553	2.07739	down
V1624	PG 42:7	3.25822e+08	1.59164e+08	3.12503e+08	4.34949e+08	2.27559e+08	2.36427e+08	141302823	7.91658e+07	115449549	1.52166e+08	1.54303e+08	6.10169e+07	0.0029838	0.41464	1.05143	down
V1627	TG 52:7	2098892867	7.23477e+08	1687850784	2169711206	1977838682	2148784804	4.9682e+08	7.18594e+08	1007815468	5.69277e+08	3.72974e+08	5.3969e+07	0.00648531	0.29792	3.027	down
V1628	TG 52:7	2.55482e+08	3.85626e+08	7.89444e+08	9.19077e+08	1274671409	3.59243e+08	3.14135e+07	3.97027e+07	6.58357e+07	3.09438e+07	3.80161e+07	1.2135e+07	0.0031536	0.054737	2.03596	down
V1630	TG 52:7	3.69195e+08	2.15838e+08	1144570124	5.19571e+08	396124700	3.1109e+08	1.24157e+08	1.78572e+08	2.20292e+08	1.53306e+08	3.55681e+08	2.90922e+08	0.0249747	0.44748	1.1813	down
V1643	TG 52:6	4138530699	1312309559	5128025012	5178883590	9277397955	7723115751	4.83379e+08	1744185768	3495236690	1179889310	1137428107	2.55348e+08	0.0079231	0.25323	5.3917	down
V1655	TG 52:5	6.14208e+08	8.78125e+08	5.33036e+08	6.70352e+08	2.96896e+08	3.45846e+08	5.17459e+08	1.25509e+08	1.23927e+08	7.39559e+07	9.90392e+07	4.68331e+07	0.0104056	0.29556	1.38439	down
V1657	TG 52:5	16550813038	24919672341	26846766727	27664987063	24843315781	22585799902	10097335875	19983376373	23036243238	12407564893	13877225493	3714148932	0.011839	0.57956	7.8394	down
V1660	PG O-44:3	7.93883e+08	3.24158e+08	7.85945e+08	8.72239e+08	4.41189e+08	6.37481e+08	4.56368e+07	3.26597e+08	3.83643e+08	2.66129e+08	6.72331e+07	2.95897e+07	0.0019704	0.29024	1.74533	down
V1668	TG 52:6	8.2112e+08	4.14059e+08	7.73728e+08	1250690139	1064630621	991310079	2.30036e+08	4.90573e+08	6.73757e+08	4.652e+08	4.6416e+08	4.82579e+07	0.0078961	0.44624	1.84083	down
V1704	TG 52:3	6.7372e+08	5.97049e+08	7.02457e+08	5.88688e+08	5.80556e+08	608067627	3.5827e+08	1.90137e+08	4.67294e+08	3.87543e+08	3.37557e+08	3.0091e+07	0.00065628	0.47217	1.52079	down
V1705	TG 54:6	3.85203e+08	6.35086e+08	3.8038e+08	3.96678e+08	8.01514e+08	9.80007e+08	309931119	3.14494e+08	7.93275e+08	2.51152e+08	2.49263e+08	1.07502e+08	0.0249747	0.56599	1.23147	down
V1709	PI 36:2	2.56074e+08	2.418e+08	2.73196e+08	257046498	3.79778e+08	2.26564e+08	1.35199e+08	9.01778e+07	9.8406e+07	1.04886e+08	1.17285e+08	1.32813e+08	0.00394775	0.41529	1.05739	down
V1712	d5-TG 52:5	2.81324e+08	2.60747e+08	4.53322e+08	2.82451e+08	2.90724e+08	4.18547e+08	8.60336e+07	4.60087e+07	2.22014e+08	1.72674e+08	149651885	5.01138e+07	0.00394775	0.3656	1.23246	down
V1738	TG 53:5	9.01403e+08	8.63171e+08	9.66191e+08	1091436551	1345435990	1197030119	4.97031e+08	8.22474e+08	9.67814e+08	5.53712e+08	6.75103e+08	1.59865e+08	0.0087005	0.57756	1.77642	down
V1743	SM 48:8	1060595958	1357595219	1448260133	1186713707	911339674	7.12999e+08	3.3621e+08	3.27607e+08	4.5054e+08	4.70785e+08	3.90646e+08	2.68826e+08	8.7889e-05	0.33615	2.20854	down
V1750	TG 53:4	1693885678	2098297035	1794405845	2568820456	2424060375	2523807824	1130499964	1956672414	1997182663	1248490546	1582055979	3.45065e+08	0.021241	0.63037	2.22283	down
V1776	TG 54:9	6.16103e+08	1.96824e+08	9.95518e+08	9.40277e+08	1280858959	6.84735e+08	9.671e+07	1.45874e+08	2.88345e+08	1.59072e+08	2.08601e+08	4.21331e+07	0.0024535	0.19955	2.13962	down
V1792	TG 54:8	6322043189	3036490115	10659056421	7805952714	2433782456	6587845382	2400993283	2270149833	3687979862	2182805367	2671882228	7.07631e+08	0.015346	0.37784	4.81629	down
V1794	TG 54:8	3359000680	8.61493e+08	3060360979	2494502693	9608585669	1983680511	3.73254e+08	449086224	7.10926e+08	3.00965e+08	4.56255e+08	110575001	0.00394775	0.11237	4.24362	down
V1805	TG 54:7	4536128975	4512067873	8256476721	9154049599	9878371912	8111754955	1202735920	1534051620	2829943311	1594719763	1337935737	7.47588e+08	0.00014675	0.20804	6.64357	down
V1806	TG 54:7	19130211652	13401549738	22117933420	18145569333	19279314907	17187372062	14030228216	8079072354	10362989252	5519827571	4553314734	1898334865	0.00048926	0.40676	8.73027	down
V1815	TG 54:8	1662343819	8.87677e+08	1354636880	1647238320	1525161988	1353710069	1.7634e+08	1.92751e+08	2.67395e+08	1.30503e+08	1.24318e+08	5.02719e+07	1.1935e-06	0.11168	3.06675	down
V1817	TG 56:11	3.94255e+08	5.85626e+07	315512081	4.28291e+08	664011097	6.86049e+08	4.76327e+07	1.807e+07	1.12883e+08	7.28354e+07	2.16274e+07	7.23085e+06	0.0029323	0.11006	1.62058	down
V1827	TG 54:7	3283047366	2634853269	3043191141	2532022617	2486056494	2490966296	2760496220	1830867107	1907928567	1609963936	1814712375	7.38211e+08	0.0087374	0.64736	2.29901	down
V1828	TG 54:7	775937222	7.5955e+08	7.77818e+08	1394576637	1068583309	1166173169	3.36349e+08	4.07609e+08	6.1561e+08	4.8585e+08	340182774	282744102	0.00062536	0.41536	2.01092	down
V1830	TG 54:7	7.58545e+08	7.42525e+08	1.51086e+08	5.19317e+08	1.68249e+08	1.68057e+08	5.45343e+07	8.7378e+07	9.54637e+07	7.96212e+07	6.62104e+07	5.48215e+07	0.016265	0.17467	1.25989	down
V1862	TG 55:9	1.1769e+08	6.47123e+07	1.91407e+08	1.94528e+08	2.79542e+08	1.9376e+08	6.51248e+07	3.75638e+07	4.45541e+07	2.91094e+07	3.05438e+07	6.16669e+06	0.00129	0.20455	1.0006	down
V1873	TG 55:8	2.99257e+08	210878512	401403041	3.8837e+08	4.20027e+08	3.06504e+08	4.00506e+07	1.16474e+08	1.36955e+08	9.5193e+07	1.05338e+08	4.30132e+06	6.068e-05	0.24591	1.38199	down
V1874	TG 55:8	5.31889e+08	351804893	7.37016e+08	7.03272e+08	9.10291e+08	9.33409e+08	5.51108e+08	2.17969e+08	3.78103e+08	258037689	314908521	1.33474e+08	0.0052874	0.44476	1.66231	down
V1887	TG 55:7	6.49774e+08	7.06855e+08	8.31483e+08	9.05306e+08	6.91156e+08	5.65602e+08	3.81647e+08	2.97127e+08	3.14826e+08	283747714	2.82445e+08	9.20707e+07	3.6664e-05	0.37972	1.76969	down
V1888	TG O-56:7	1.32526e+08	2.25051e+08	193624209	1.64288e+08	1.55479e+08	1.20643e+08	2.69714e+08	4.2041e+08	2.72447e+08	1.49132e+08	3.84525e+08	1602160731	0.0249747	3.1246	1.50108	up
V1908	TG O-56:5	109494012	1.65966e+08	1.48298e+08	1.26521e+08	6.54211e+07	9.34612e+07	449105374	2.82425e+08	1.96398e+08	1.08924e+08	2.6859e+08	1598808755	0.0249747	4.0953	1.54087	up
V1921	d5-TG 55:6	8.98151e+08	4.67453e+08	7.10381e+08	5.00175e+08	7.83696e+08	6.54964e+08	2.92137e+08	2.86516e+08	3.51557e+08	3.38558e+08	2.68557e+08	1.36499e+07	0.00394775	0.38631	1.66956	down
V1922	d5-TG 55:6	6.655e+08	8.19637e+08	6.16156e+08	7.0642e+08	8.94393e+08	1128411733	2.70951e+08	7.23082e+08	7.17353e+08	6.24719e+08	6.14376e+08	9.38893e+07	0.047338	0.63024	1.30173	down
V1926	TG 56:10	4.88414e+08	1.3682e+08	4.79676e+08	4.44956e+08	1522827027	9.19018e+08	3.98474e+07	2.83017e+07	1.12999e+08	5.6208e+07	3.28151e+07	3.68382e+07	0.00394775	0.076912	1.97459	down
V1927	TG 56:10	1124858367	6.87986e+08	2947412992	1824366510	2805903429	2090854690	3.30536e+08	2.82655e+08	6.71674e+08	169039842	2.734e+08	5.88358e+07	0.0015709	0.15557	3.44517	down
V1937	TG 56:9	13634553177	9380554089	20179134371	16090542659	14484081469	13422620375	8377575215	7041320083	10539180111	7090047067	7890811177	1700960895	0.0027404	0.48904	7.32561	down
V1938	PG O-46:2	1475925095	1201716091	2278148812	1855956551	2613555456	8403890137	1426467681	1005654092	1605547450	1072984549	1147686328	3.08486e+08	0.0163092	0.36832	2.96174	down
V1949	TG 56:10	5.99917e+07	1.17275e+08	4.06217e+08	3.0345e+08	3.65089e+08	1.18882e+08	3.06756e+07	1.40861e+07	6.37971e+07	1.63834e+07	1.04726e+07	1.65182e+07	0.00648531	0.11083	1.15881	down
V1950	TG 56:10	5.49157e+08	8.74935e+07	3.87252e+08	2.62277e+08	5.97463e+08	7.75586e+08	2.09562e+08	9.88372e+07	1.46982e+08	1.61997e+08	1.30647e+08	2.49817e+07	0.013147	0.29069	1.39889	down
V1960	TG 56:9	9.49287e+08	5.99042e+08	4.70083e+08	8.2719e+08	1480589088	1557868309	2.50579e+08	2.82063e+08	4.66219e+08	2.04237e+08	1.27681e+08	2.38211e+08	0.0035221	0.26665	2.12507	down
V1985	TG 56:7	1239725866	1232557478	1679767300	1249546727	1012807237	1005790705	6.56752e+08	2.10954e+08	2.9747e+08	2.68505e+08	2.66725e+08	2.84151e+08	0.00394775	0.26745	2.5296	down
V1987	TG 56:4	2340683157	3602613169	2837251585	3186782537	3099775022	3103027113	5801483761	5868959781	4361930087	5253310853	4817438046	3013493682	0.0030014	1.6024	3.65825	up
V2002	TG 56:3	7.80855e+08	1444087529	8.82507e+08	1047292853	7.46722e+08	8.04295e+08	4280942562	4250744599	2338106644	3216480240	3287562258	1036489472	0.0020991	3.2266	3.92684	up
V2011	d5-TG 56:5	3.61495e+08	4.46464e+08	9.52149e+07	4.80448e+08	3.71387e+08	3.57415e+08	9.09505e+07	5.86697e+07	5.83364e+07	6.59456e+07	6.45269e+07	3.56059e+07	0.00040623	0.17706	1.29729	down
V2015	TG 57:9	2.75439e+08	2.36438e+08	4.1934e+08	3.48352e+08	4.93084e+08	4.85901e+08	2.63633e+08	1.83192e+08	2.64143e+08	2.12969e+08	2.67843e+08	8.8567e+07	0.011108	0.56689	1.09895	down
V2016	TG 57:9	1.95786e+08	2.22007e+08	2.61448e+08	2.83915e+08	4.06956e+08	3.51577e+08	8.5981e+07	8.53849e+07	1.21022e+08	1.0288e+08	9.34886e+07	1.62676e+07	0.00020262	0.29333	1.21534	down
V2026	TG 57:8	3.16553e+08	4.01971e+08	3.83506e+08	4.36551e+08	4.16493e+08	3.40728e+08	1.81381e+08	2.42475e+08	2.25925e+08	2.31512e+08	2.25436e+08	6.46812e+07	0.00394775	0.51024	1.11074	down
V2028	TG O-58:8	4.21101e+07	6.21221e+07	6.73783e+07	4.93045e+07	4.93461e+07	4.50664e+07	9.28134e+07	1.61808e+08	1.33149e+08	5.75642e+07	1.58802e+08	8.58646e+08	0.0104056	4.6389	1.0921	up
V2033	TG 56:3	3.1205e+08	4.56756e+08	3.5055e+08	4.3659e+08	334338142	3.6872e+08	1001729507	1311362332	901041689	1099400765	1040474325	3.19758e+08	0.0021679	2.5116	2.04443	up
V2044	TG O-58:6	6.62976e+07	9.60462e+07	9.00553e+07	7.03331e+07	4.24667e+07	5.24356e+07	2.37395e+08	1.49555e+08	1.25614e+08	6.83736e+07	1.67697e+08	1068538598	0.0163092	4.3511	1.23455	up
V2050	TG 58:12	2.25695e+08	3.11936e+07	1.91593e+08	3.41368e+08	4.68457e+08	313124712	2.94245e+07	5.35331e+07	3.86094e+07	3.16437e+07	9.35955e+07	2.64136e+07	0.0249747	0.17387	1.19481	down
V2053	TG 57:5	8.49219e+08	7.14645e+08	6.62553e+08	6.78805e+08	8.34874e+08	7.7448e+08	3.15771e+08	5.53631e+08	6.9746e+08	5.0631e+08	4.02243e+08	8.55078e+07	0.0055354	0.56726	1.43838	down
V2057	TG 58:11	1369506802	8.1908e+08	1816762351	1771958348	2419607512	1732765367	4.84221e+08	2.75913e+08	575928203	5.23056e+08	3.62334e+08	3.46841e+08	0.00025247	0.25865	3.04296	down
V2058	TG 58:11	1228439786	9.67313e+08	3479218247	2192591112	6036900612	6879489975	5.48068e+08	3.08659e+08	7.51896e+08	3.36851e+08	3.84766e+08	5.66734e+07	0.013422	0.11484	4.44091	down
V2059	TG 58:11	9.47405e+08	8.30944e+08	1629123698	1101798328	1855898093	1192903368	1065086163	7.02903e+08	7.61376e+08	7.89444e+08	6.35194e+08	4.26724e+08	0.016661	0.57961	1.88585	down
V2065	TG 58:10	8550952417	9186156713	12475291172	10116324734	18144990592	19650810559	6777532094	5014793107	8938269562	6908161677	6454163232	1327869615	0.0091882	0.45339	7.11855	down
V2066	TG 58:10	6.36184e+08	1.67996e+08	1239770947	9.00955e+08	1826762010	1311073224	6.37334e+07	6.73843e+07	7.04252e+07	3.40427e+07	7.83197e+07	1.89811e+07	0.0022973	0.054726	2.59833	down
V2067	TG 58:10	7.90516e+08	1236380003	1236366336	1007036779	1100677984	1122833390	2694077647	2033983931	1738684899	2459589344	2163479092	2283873438	1.9909e-05	2.0595	2.83681	up
V2072	PG O-50:8	2.79726e+08	7.42121e+07	3.96639e+08	5.40518e+08	6.03185e+08	4.32447e+08	4.11425e+07	2.14565e+07	5.0912e+07	5.1502e+07	1.42941e+07	3.35559e+07	0.0011236	0.091486	1.59748	down
V2073	d5-TG 58:12	2.81344e+08	1.32707e+08	5.32624e+08	4.23532e+08	8.40395e+08	544962815	3.97299e+07	2.24856e+07	4.71741e+07	3.20351e+07	2.88042e+07	1.46197e+07	0.0015685	0.067082	1.74412	down
V2077	TG 58:9	1429254179	1570419237	2452782533	1772846775	3577992357	3044724742	1143409804	8.03371e+08	1398357500	1217035628	1022987952	6.18069e+08	0.0066375	0.44795	2.99605	down
V2081	TG 58:11	3.68597e+08	3.40024e+08	5.31463e+08	5.62701e+08	3.22451e+08	3.72753e+08	2.09764e+08	1.26172e+08	2.60932e+08	2.30366e+08	1.19238e+08	1.78966e+08	0.00078555	0.45054	1.2892	down
V2083	TG 58:11	5.60724e+08	2.19793e+08	8.35367e+08	7.16369e+08	1744177240	1889743511	1.71116e+08	9.13283e+07	2.85025e+08	1.95446e+08	1.64979e+08	2.88044e+07	0.012639	0.157	2.34269	down
V2086	d5-TG 58:11	8.45936e+08	9.17056e+08	1374627625	1135366096	2411357933	1907081626	6.69258e+08	4.96355e+08	6.3096e+08	6.89561e+08	6.75025e+08	1.07714e+08	0.00394775	0.38048	2.47279	down
V2091	PG O-48:1	1885799054	2773001151	2775198783	2389193583	4512383089	3800497471	1503008036	1787205583	2235204073	2267545966	2135781328	8.98939e+08	0.021949	0.59702	2.83511	down
V2094	TG 58:10	1.19362e+08	1.66181e+08	1.39621e+08	134198738	1.2621e+08	1.47321e+08	4.23904e+08	3.15111e+08	2.36392e+08	4.28194e+08	3.37069e+08	6.76844e+08	0.0017601	2.9025	1.32536	up
V2095	TG 58:10	1.82386e+08	1.34797e+08	2.6597e+08	2.31479e+08	3.01826e+08	2.51921e+08	5.67676e+07	2.50889e+07	6.77396e+07	5.10216e+07	2.43075e+07	4.01704e+07	3.0637e-05	0.19373	1.18805	down
V2096	TG 58:10	1907403881	2006276932	2168923369	1957211632	2703402577	3170356123	1481248167	1346078111	2071660339	1842055606	1596746724	5.60294e+08	0.018423	0.63953	2.44044	down
V2103	TG 58:7	7.67971e+08	3.00833e+08	1103609127	204520269	1012300186	9.77648e+08	3.41707e+08	1.69294e+08	1.5553e+08	201259958	2.59401e+08	1.28761e+08	0.0090335	0.28761	1.78579	down
V2119	TG 58:5	4.14445e+08	6.21231e+08	5.41692e+08	5.0578e+08	4.03693e+08	4.42464e+08	1932294263	1031619673	746789719	1113059922	1087177126	1597403532	0.0016928	2.5632	2.20553	up
V2128	TG 58:4	1.01757e+08	1.76305e+08	1.32837e+08	1.40762e+08	1.09175e+08	1.18877e+08	8.14439e+08	3.52685e+08	2.03925e+08	2.84219e+08	3.04636e+08	4.37561e+08	0.013014	3.0748	1.21783	up
V2141	TG 58:5	1.62107e+08	1.8566e+08	1.94179e+08	1.77068e+08	1.4891e+08	1.694e+08	5.02728e+08	2.87139e+08	2.80519e+08	3.8402e+08	3.18391e+08	5.52386e+08	0.0011346	2.2415	1.16513	up
V2158	TG 60:13	1359851840	7.95097e+08	3036073752	2399194729	4297919000	3034056703	3.46569e+08	1.71412e+08	5.14057e+08	2.85418e+08	2.39838e+08	1.90009e+08	0.0017559	0.11709	3.9752	down
V2165	PG O-50:5	4.32628e+08	2.55335e+08	8.61481e+08	553016192	1453699318	9.79795e+08	2.04578e+08	1.22145e+08	1.95871e+08	1.76112e+08	1.87283e+08	3.12396e+07	0.0072382	0.20221	2.03338	down
V2167	TG 60:12	1571432868	1342470084	1959114854	1791040797	2961293626	2740230787	1440305762	1026898759	1655929023	1229169224	1243849104	9.08058e+08	0.01821	0.60686	2.39601	down
V2176	TG 60:13	6.20165e+08	2.26718e+08	3.45989e+08	5.50716e+08	1006539510	1059379846	4.37457e+08	1.18466e+08	1.77974e+08	1.63301e+08	8.76506e+07	1.00879e+08	0.0104056	0.285	1.66187	down
V2203	TG 60:8	3.19148e+08	387269808	4.78943e+08	4.28248e+08	3.9464e+08	4.2481e+08	1109259507	7.371e+08	5.42914e+08	7.5336e+08	7.97835e+08	7.42483e+08	0.00072362	1.9247	1.54746	up
V2225	TG 60:6	9.73539e+07	1.67562e+08	1.26302e+08	1.28912e+08	1.10027e+08	1.05211e+08	4.97495e+08	2.2425e+08	1.81727e+08	2.75641e+08	2.55789e+08	4.70919e+08	0.0054786	2.5917	1.08906	up
V2242	TG 60:6	8.62769e+07	150541826	1.21506e+08	1.07242e+08	7.56558e+07	8.52996e+07	3.56268e+08	2.34654e+08	2.02669e+08	3.74578e+08	2.80479e+08	3.82511e+08	0.00012987	2.9227	1.17565	up
V2270	TG 62:13	5.15337e+08	4.35154e+08	1076946626	7.18553e+08	1820326892	1417479226	3.72495e+08	1.94845e+08	3.71838e+08	3.36228e+08	308104088	8.97107e+07	0.010159	0.27963	2.21818	down
V2279	TG 62:11	4.56258e+07	137596972	7.11192e+07	2.62711e+07	5.01711e+07	3.75643e+07	1.59945e+08	1.81149e+08	1.59322e+08	2.7003e+08	1.83659e+08	3.35531e+08	0.001029	3.5011	1.028	up
V2407	FA 18:4	1193395940	8.27176e+08	1070348105	8.41294e+08	1424424465	1008671694	5.56369e+08	1.82703e+08	2.0658e+08	1.54272e+08	2.29855e+08	2.38551e+08	0.00394775	0.24639	2.37253	down
V2409	FA 18:3	1312493196	1003742590	7.6159e+08	6.37426e+08	1142831562	1158934736	1297755603	591288423	4.05055e+08	5.26283e+08	5.91309e+08	5.17543e+08	0.037373	0.65302	1.0924	down
V2425	FA 20:5	2759522540	1477427861	2927566802	1381924634	2176194578	1648765665	1342801311	9.34272e+08	9.25077e+08	8.69504e+08	7.03213e+08	8.7858e+08	0.0028797	0.45698	2.6429	down
V2430	FA 20:3	2198407508	2022414440	1700687660	1350710308	2007494126	1845742838	4791577658	2909338137	2347802544	3471581411	4153203287	2020196228	0.010151	1.7701	2.9762	up
V2431	FA 20:2	3529165900	3857982537	2672427269	2095452971	5425165219	4944740498	8521301982	8521651787	4734558953	6538588371	5996847796	2979496253	0.037544	1.6556	4.20027	up
V2432	FA 20:2	6.11537e+08	5.96747e+08	3.62353e+08	2.77565e+08	7.82678e+08	670418788	1443733893	1362799845	7.93924e+08	1252181641	1244823058	4.5487e+08	0.011524	1.9848	1.98712	up
V2440	FA 21:5	6.07732e+08	422400467	539428464	3.75252e+08	7.6691e+08	5.72296e+08	4.31811e+08	1.80909e+08	1.61042e+08	1.68712e+08	2.33791e+08	6.0709e+07	0.0011954	0.37666	1.47962	down
V2453	FA 22:4	3344218434	3975671188	2977564303	1880374634	3975961980	4758116694	9931022899	8506912032	5826325346	6692793169	5517828527	7197279344	0.00076931	2.0884	5.11449	up
V2455	FA 22:3	2.09242e+08	2.45586e+08	1.30187e+08	9.48925e+07	1.91776e+08	1.99159e+08	1344019312	1172515124	5.71732e+08	1309870133	9.80634e+08	3.56375e+08	0.00093667	5.3557	2.36738	up
V2462	FA 22:1	2.05151e+08	268680101	1.7853e+08	1.43742e+08	3.05366e+08	2.6078e+08	1655992324	6.92881e+08	4.88589e+08	4.56354e+08	5.18734e+08	494425970	0.00394775	3.1617	1.58303	up
V2476	FA 24:5	1.24005e+08	136836102	7.50219e+07	56742178	1.82023e+08	1.65299e+08	1157467981	842171333	4.25091e+08	7.52177e+08	4.93999e+08	6.10888e+08	0.00033718	5.7868	2.0206	up
V2477	FA 24:5	8.42439e+08	1340828629	8.16577e+08	668715639	1921085451	1419588308	1181653340	5.99923e+08	4.22382e+08	586634998	649709373	1.34041e+08	0.038289	0.50995	1.68059	down
V2479	FA 24:4	2.18367e+08	3.15638e+08	1.36517e+08	1.14357e+08	2.92551e+08	3.66657e+08	8.95833e+08	7.02656e+08	3.78864e+08	5.11501e+08	4.20253e+08	3.75634e+08	0.0091802	2.2746	1.42804	up
V2482	FA 24:2	9.15179e+07	1.24622e+08	7.01541e+07	6.71634e+07	131494697	1.20695e+08	2.14234e+08	3.07881e+08	2.19314e+08	2.08584e+08	2.03339e+08	2.69682e+08	6.3666e-05	2.3496	1.0006	up
V2483	FA 24:1	4.44445e+08	574368800	4.25189e+08	3.23855e+08	5.57614e+08	5.25387e+08	1002043812	1212295774	9.26331e+08	8.32765e+08	9.70547e+08	1194838609	2.0311e-05	2.1533	2.01547	up
V2497	ST 24:1+O4	146661451	1.86864e+08	9.82829e+07	8.22635e+07	1.88266e+08	1.8692e+08	5.65951e+08	4.98504e+08	2.53768e+08	3.98242e+08	3.93911e+08	141303644	0.0067071	2.5321	1.28085	up
V2526	LPE 18:2	9.05439e+08	9.2244e+08	888286340	8.15334e+08	1065531978	1117803611	8.35347e+08	4.32694e+08	4.95413e+08	3.86961e+08	4.98214e+08	2.37281e+08	0.00050846	0.50499	1.74819	down
V2543	LPE 20:5	4.54498e+08	369752034	5.53033e+08	4.44755e+08	3.98583e+08	2.68046e+08	1.57394e+08	1.42326e+08	1.85009e+08	1.2136e+08	1.68651e+08	5.00813e+07	8.2014e-05	0.33143	1.39462	down
V2581	Cer 34:1	3.44404e+08	4.31606e+08	4.08321e+08	3.09664e+08	4.35752e+08	4.23452e+08	7.24258e+08	8.12713e+08	8.02862e+08	6.44431e+08	4.5588e+08	8.36146e+08	0.00045556	1.8172	1.41593	up
V2620	LPC 19:1	370563910	4.24633e+08	3.83846e+08	349425866	1.14034e+08	1.10624e+08	6.18114e+08	5.5822e+08	476675305	4.32517e+08	5.18186e+08	4.24731e+08	0.00394775	1.7275	1.13541	up
V2626	Cer 34:1	1053306700	1329307340	1211506497	1054323771	1182546149	1153890105	2137121042	2745622353	2598033192	1981224999	1451933928	2675943367	0.00037773	1.9456	2.6541	up
V2654	LPC 21:4	3.80833e+08	4.06883e+08	353823306	2.90947e+08	3.73992e+08	405776112	492798009	7.42684e+08	6.40327e+08	637099224	6.33627e+08	5.23126e+08	0.00014537	1.6588	1.3384	up
V2737	Cer 40:2	2.03887e+08	1.73348e+08	1.69691e+08	1.78647e+08	1.84636e+08	2.00694e+08	9.75011e+08	5.74261e+08	5.91625e+08	5.43077e+08	4.37886e+08	6.31213e+08	0.00015779	3.3784	1.67829	up
V2751	Cer 40:3	143543175	1.21047e+08	1.24255e+08	1.22863e+08	1.76905e+08	1.6809e+08	512665714	4.05289e+08	4.17165e+08	3.53465e+08	2.42176e+08	3.81919e+08	7.1378e-05	2.6995	1.25489	up
V2755	Cer 41:2	4.56555e+08	445402336	4.03698e+08	4.5122e+08	4.62117e+08	4.70162e+08	2630932618	1521727399	1544400091	1450866131	1135274662	2226296884	0.00019769	3.9081	2.88295	up
V2784	Cer 41:2	6.65038e+08	6.91008e+08	9.34686e+08	7.1774e+08	9.9644e+08	6.68079e+08	5.04653e+08	2.58993e+08	1.60114e+08	1.88475e+08	2.24376e+08	1.68665e+08	0.00394775	0.32212	1.90243	down
V2799	Cer 42:5	2.65918e+07	3.85231e+07	2.6045e+07	2.72095e+07	3.50916e+07	4.17972e+07	1.15e+08	3.01343e+08	3.38777e+08	2.95937e+08	2.08504e+08	1.55783e+08	0.00024925	7.2486	1.15644	up
V2804	Cer 42:3	2624279742	2483074028	2732393901	2373683621	3164895691	2757095426	3811760437	4676701318	3064975492	3932464763	3228410607	6832343366	0.021528	1.5833	3.05926	up
V2822	PE 34:2	7.75638e+08	8.47036e+08	9.75892e+08	1071555970	8.03229e+08	7.18667e+08	5.91596e+08	3.86544e+08	5.33365e+08	3.58564e+08	4.3553e+08	2.60609e+08	0.00013672	0.49426	1.74809	down
V2848	PEt 36:4	1.4655e+08	3.40293e+08	1.76377e+08	1.72399e+08	3.81068e+08	3.23402e+08	8.29851e+07	5.99511e+08	3.72602e+08	5.78936e+08	7.78476e+08	8.43206e+08	0.040485	2.114	1.21583	up
V2849	PE O-36:4	5.40702e+08	5.16857e+08	7.59926e+08	4.01353e+08	1208725596	1303240066	617569928	3.86242e+08	3.73982e+08	2.51105e+08	4.41699e+08	1.42862e+08	0.032644	0.46788	1.5907	down
V2879	PE 36:3	7.08558e+08	7.58744e+08	8.41358e+08	9.71484e+08	712077902	793454257	4.84518e+08	4.86398e+08	5.10062e+08	3.80117e+08	5.74654e+08	2.95655e+08	0.00014005	0.57075	1.52149	down
V2880	PE 36:2	5.16119e+08	567991980	5.89744e+08	6.13179e+08	6.78448e+08	6.60177e+08	4.42562e+08	248784069	3.35566e+08	2.28418e+08	2.96941e+08	1.9274e+08	3.2675e-05	0.48129	1.50013	down
V2893	PG 34:2	2.28029e+08	5.77453e+08	3.7001e+08	4.2482e+08	2.31232e+08	1.88595e+08	6.3859e+08	9.004e+08	6.9455e+08	4.64772e+08	4.26286e+08	1497269401	0.030656	2.2879	1.66523	up
V2899	LBPA 34:1	5.35135e+08	1492512529	1589653737	1644907970	1448311146	1244542342	2780180909	1746435357	1752822291	2080930131	2061653101	1852885772	0.00394775	1.543	1.92386	up
V2936	PE 38:7	7.03155e+08	7.58582e+08	1042635371	1208777258	3.81895e+08	2.04459e+08	2.52473e+08	356046557	4.29009e+08	1.17882e+08	2.08636e+08	1.45812e+08	0.017234	0.35117	1.59909	down
V3125	LBPA 40:7	5.43054e+08	2510264416	1347987208	1320264955	1117849290	5.75573e+08	3116055490	3216004186	2625133377	1058197759	2059218722	2552915172	0.020495	1.9727	2.63553	up
V3270	PC 39:5	3.26681e+08	3.75195e+08	3.59117e+08	3.32219e+08	321784514	3.51768e+08	3.25076e+08	1018287327	5.38471e+08	5.88362e+08	7.30225e+08	5.74892e+08	0.013197	1.8267	1.33659	up
V3271	PC 39:5	4.92843e+08	2.97109e+08	5.16505e+08	4.82679e+08	3.7063e+08	2.25089e+08	3.7673e+07	1.72916e+08	4.94206e+08	7.22767e+07	5.88357e+07	7.41992e+07	0.037373	0.38162	1.2343	down
V3277	PC 39:4	1.48411e+08	1.26586e+08	1.99552e+08	1.96774e+08	132073796	1.30553e+08	1.5722e+08	4.82607e+08	3.84601e+08	3.35599e+08	3.86077e+08	2.53295e+08	0.0104056	2.1408	1.02515	up
V3321	PI 38:6	4.72739e+07	1.35234e+08	2.24236e+08	2.4222e+08	2.33874e+08	2.73997e+08	2.56052e+08	3.48211e+08	4.11337e+08	5.15841e+08	3.64182e+08	1884372890	0.00648531	3.2675	1.54721	up

## Sheet: FT vs FP
Identification number	Lipid name	FP						FT						Paired comparison
		FP1	FP2	FP3	FP4	FP5	FP6	FT1	FT2	FT3	FT4	FT5	FT6	FT/FP p value	FT/FP FC	FT/FP VIP	FT/FP regulation
V34	CAR 16:0	2.97256e+08	278651739	3.02885e+08	3.97546e+08	3.21531e+08	3.70933e+08	8.74229e+08	1189134508	1919722011	1576456465	5.34755e+08	751420541	0.0037025	3.4771	1.70552	up
V46	CAR 18:0	1.34062e+08	2.67485e+08	2.84429e+08	3.61306e+08	2.46015e+08	3.87545e+08	6.01619e+08	8.14537e+08	1125998514	773368054	4.45364e+08	8.44944e+08	0.0007187	2.7402	1.37071	up
V62	DG 24:5	6.23813e+07	5.90424e+08	6.93897e+08	5.32888e+08	5.85059e+08	253907136	5.85467e+06	2.07525e+06	5.2326e+06	7.35328e+07	4.69094e+06	217125	0.00648531	0.033696	1.29377	down
V121	LPE 18:0	2841769481	1106722409	1429568783	1039162016	1399210215	5.04104e+08	2815788737	2106543156	1975161819	2594403680	2236560074	2015686364	0.02733	1.6518	1.77949	up
V122	LPC O-16:0	4.23187e+08	4.269e+08	3.30398e+08	2.90417e+08	3.55376e+08	2.73799e+08	5.61452e+07	6.96877e+07	2.79523e+07	6.85302e+07	1.70206e+08	6.04717e+07	0.00394775	0.2157	1.10564	down
V140	PE O-20:3	1764846404	6.09249e+08	7.52994e+08	4.40673e+08	6.19502e+08	2.42201e+08	1610439862	1344921564	1283611820	1266706422	1174941601	1428881989	0.021895	1.8308	1.4163	up
V143	LPC O-18:3	1203255074	1008125791	7.65768e+08	6.40164e+08	7.39304e+08	4.92759e+08	202472034	1.90104e+08	7.77348e+07	2.20306e+08	3.67569e+08	1.57058e+08	0.0002961	0.2506	1.60901	down
V159	LPC 17:0	1443278952	1414110310	1526691938	1248599573	1556620829	1381090495	8.68991e+08	1106957560	1018066357	1025978175	8.93891e+08	6.18824e+08	0.00012545	0.64556	1.48325	down
V173	LPC 18:2	31749077214	25604326848	26503812165	20152569936	24671070332	23937465453	12451494350	15598602768	14133637606	13658152038	14551938311	11517445481	3.287e-05	0.53671	7.25272	down
V174	LPC 18:2	1044955570	5.54704e+08	1.985e+08	5.04259e+08	6.38389e+08	7.74594e+07	3.03661e+07	1.69774e+07	2.80677e+07	1.12847e+07	1.60032e+08	1.96377e+07	0.00648531	0.088251	1.29209	down
V175	Cer 34:1	3.77184e+08	6.5458e+08	4.84982e+08	318143020	2.37283e+08	3.39698e+08	1455335362	1013900385	1066680239	1066091679	7.96456e+08	3.62228e+08	0.0057577	2.3885	1.50236	up
V180	VAE 16:1	1.05985e+08	5.05341e+08	7.0606e+08	6.46301e+08	1973570650	1352892160	3.57784e+06	1.84553e+06	4.42361e+06	2.44116e+07	3.56051e+06	0	0.00394775	0.007149	1.71959	down
V193	LPC 17:0	3899506030	2939073600	3062371037	2235487418	2790050984	1986848835	1983411691	2506055561	1871625310	1970368607	1340531374	9.06732e+08	0.014531	0.62547	2.13814	down
V206	Cer 34:1	2.12506e+08	3.1504e+08	2.63971e+08	173436018	1.57012e+08	1.98876e+08	7.10107e+08	5.48941e+08	5.85887e+08	5.83785e+08	4.43611e+08	1.94788e+08	0.0033721	2.3221	1.08808	up
V210	LPC 20:5	2359333946	2595427665	3369270999	2683375064	2972438926	3941042539	1564601750	2036038756	2145729345	2172364549	2318049319	1684743326	0.0038083	0.66523	1.99036	down
V212	LPC 18:2	1617220264	770977652	6.62353e+08	6.64995e+08	8.37373e+08	3.78616e+08	2.32907e+08	3.52293e+08	1.98866e+08	2.95264e+08	2.72815e+08	2.27894e+08	0.0090237	0.3204	1.44595	down
V213	LPC 20:5	1432323030	2092888157	3090937128	1620343112	2334176987	1400394742	3.44438e+08	489613245	4.2518e+08	4.58777e+08	441725203	177716745	0.00014577	0.19526	2.6419	down
V224	Cer 36:1	2.86004e+08	3.16668e+08	254495771	2.80843e+08	2.3006e+08	1.49841e+08	8.83526e+08	5.56049e+08	4.84053e+08	5.72207e+08	5.85967e+08	7.88011e+08	0.00017301	2.5494	1.28311	up
V236	DG O-31:3	1.27987e+08	1490401166	1862683223	1030927588	2225943221	7.80571e+08	6.01248e+06	5.72814e+06	8.80403e+06	7.0062e+07	1.39041e+07	5502.69	0.00394775	0.013901	2.148	down
V237	DG O-33:6	2.08869e+08	2477523391	3165624281	2336349760	3360909631	2656647862	1.97125e+07	1.36917e+07	2.40429e+07	1.97002e+08	1.96395e+07	841930	0.00394775	0.019353	3.02295	down
V250	LPC 20:5	3.20573e+08	5.59305e+08	8.27308e+08	4.78731e+08	6.44663e+08	3.99231e+08	6.66005e+07	121666324	1.10504e+08	1.09241e+08	1.1367e+08	4.6649e+07	0.00015335	0.17596	1.3779	down
V253	LPC 20:4	1007413468	9.14473e+08	6.7244e+08	863647783	9.71674e+08	3.58634e+08	4.029e+08	6.43548e+08	334049381	5.27961e+08	4.49018e+08	3.70242e+08	0.011086	0.56967	1.15437	down
V258	Cer 36:1	2.0288e+08	2.19375e+08	1.55438e+08	2.05088e+08	1.41203e+08	9.8394e+07	5.9693e+08	3.64262e+08	3.50356e+08	3.5251e+08	398684186	5.65311e+08	0.00394775	2.5705	1.04634	up
V262	LPC 22:6	35639208442	18402395958	20209018863	24169974995	27147462137	19844466215	14183965486	13308038766	11813670048	12897866378	16261406954	15311822672	0.0035927	0.57613	6.07137	down
V271	LPC 20:1	4103242551	5119263047	3265609303	2066975739	3034092894	1190799936	4747119738	6409281210	6318684150	3777667640	7688311094	4232213076	0.017229	1.7664	2.66688	up
V303	DG 32:1	138811907	1.11322e+08	6.45427e+07	6.32559e+07	1.18205e+08	8.31261e+07	5.96025e+08	3.99607e+08	3.06068e+08	8.92667e+08	2.737e+08	2.35568e+08	0.006597	4.6674	1.18574	up
V307	TG 31:2	2.89142e+07	2.91346e+08	4.22371e+08	3.73403e+08	2.94873e+08	9.13121e+08	8.37893e+06	4.71295e+06	1.59222e+07	8.91481e+07	6.04223e+06	443243	0.00648531	0.053634	1.15731	down
V309	TG 31:2	3.2376e+07	2.76224e+08	4.47716e+08	277477109	5.6513e+08	1.57687e+08	2.82737e+06	1.25999e+06	1.94002e+06	5.07785e+07	6.03665e+06	561792	0.00648531	0.036095	1.00257	down
V316	DG 32:1	3.80594e+08	1.72529e+08	1.12059e+08	1.54269e+08	2.03747e+08	2.13768e+08	1396717597	7.84315e+08	8.96083e+08	2246493371	9.24412e+08	7.01106e+08	0.0028	5.6179	1.94047	up
V325	TG O-32:0	8.53898e+08	4.60635e+08	2.91105e+08	5.58949e+08	3.88163e+08	6.14455e+08	2536430387	1683857214	1199776268	2911778670	1614036231	1521262254	0.00061753	3.6206	2.4334	up
V342	DG 34:1	1.64509e+08	1.26529e+08	8.02404e+07	91559992	7.83557e+07	6.37695e+07	5.46629e+08	3.79642e+08	3.02895e+08	4.26784e+08	1.83281e+08	2.39995e+08	0.0013861	3.4369	1.03741	up
V344	DG 33:4	79808455	1132097393	1696493178	9.46825e+08	1878910429	5.30199e+08	8.79639e+06	6.96476e+06	6.06238e+06	6.72421e+07	3.70174e+06	0	0.00394775	0.014809	1.93834	down
V363	TG 33:3	1.68047e+07	7.8395e+08	9.77823e+08	2.57435e+08	3.15817e+08	1.17948e+08	759158	375491	2.37829e+06	4.3843e+07	3.87226e+06	0	0.00648531	0.020742	1.16166	down
V367	PG O-25:1	3.06905e+07	2.77402e+08	3.88588e+08	268634342	4.78533e+08	3.29907e+08	3.18373e+06	842216	11177.3	1.1037e+07	0	0	0.00388491	0.0084984	1.06771	down
V371	DG 34:2	6517323929	4539524336	3589357644	2599959308	2982833675	1204289525	10141138709	6962846728	6808693609	9510687195	5106431726	4010122121	0.016781	1.9848	3.89107	up
V373	TG 33:4	2.62107e+07	1092402719	3.28565e+08	9.19203e+08	5.43312e+08	951680023	1.22962e+07	361152	764526	1.06955e+07	102626	0	0.00394775	0.0062724	1.46318	down
V376	PG O-25:0	1.32382e+08	1092132805	1441423945	9.09352e+08	1758828262	2.44642e+08	1.15356e+07	5.26687e+06	8.57461e+06	5.55056e+07	0	0	0.00388491	0.014498	1.81977	down
V378	DG 34:1	3699728693	3165927647	2175523514	2614092702	2357017012	1833144600	14595997223	10449832124	7772566172	11061414738	5955717274	6736331064	0.00052039	3.5702	5.49447	up
V381	TG 33:3	2.3059e+07	2.15584e+08	4.17015e+08	3.93804e+08	575173818	203521458	3.71877e+06	1.01751e+06	2.40778e+06	2.24335e+07	757725	30504	0.00394775	0.01661	1.02752	down
V383	TG 35:6	1.96376e+07	3.601e+08	5.78656e+08	2.73381e+08	7.64677e+08	2.6268e+08	1.55341e+06	1.19443e+06	1.01589e+06	2.07509e+07	1.88425e+06	13278.4	0.00648531	0.011691	1.14815	down
V386	TG 33:2	7.81125e+07	1104783704	1459074066	6.86671e+08	1913315103	3.77614e+08	2.77594e+06	3.57442e+06	10093.5	3.89456e+07	4.08559e+06	1.08181e+06	0.00394775	0.0089817	1.81036	down
V388	DG 34:2	1047572122	3803018840	2971256268	2812466356	2978131552	1530175241	8754065108	6069006279	6583874446	9472686552	5675491131	4668642951	0.00053199	2.7224	4.31586	up
V389	DG 36:5	4430678103	3201483845	2498050304	2359959661	2492903418	1218732418	7367063961	5116900672	5569211171	8012041530	4756047678	4246074171	0.0018976	2.1644	3.67414	up
V394	DG 34:1	6973477378	6955341743	5967727054	7415132300	5942370970	6142692672	15636675605	13873225941	13668005780	17565011575	14194752408	14797394319	1.4656e-07	2.2777	6.23147	up
V397	DG 36:4	1.74664e+08	7.71732e+07	5.75993e+07	3.03014e+08	7.27513e+07	6.0736e+07	1675295552	1422752464	7.04859e+08	1347221431	5.54879e+08	1029673411	0.00394775	9.0285	2.10864	up
V405	TG O-36:3	1077286069	1208573797	1158631835	1036770701	1092787896	2.89592e+08	1768598720	1727726308	1351459602	1932871054	1137236862	1124132995	0.0249747	1.542	1.54873	up
V408	LPC O-27:8	2195840761	2206187733	1731405492	2901663416	2665475710	1995446346	495835	305621	600774	1.02145e+07	1.27392e+06	478378	0.00394775	0.00097613	3.1574	down
V415	MePC 23:1	4.68943e+07	3.9016e+08	4.72952e+08	3.12076e+08	6.06596e+08	2.92469e+08	1.22186e+07	5.41241e+06	5.03337e+06	5.80199e+07	1.56112e+07	1.48073e+07	0.00648531	0.052379	1.12312	down
V416	DG 36:2	4.10345e+08	5.24279e+08	3.30339e+08	3.12312e+08	3.55618e+08	1.23071e+08	1354467872	1105529769	7.72605e+08	9.43796e+08	5.44975e+08	8.29643e+08	0.00098068	2.7	1.60262	up
V431	TG O-37:7	2.76803e+07	5.88873e+08	7.69091e+08	4.76897e+08	9.96425e+08	1.52267e+08	5.85272e+06	4.17565e+06	3.91632e+06	4.8884e+07	11024.5	0	0.00648531	0.020868	1.3104	down
V458	DG 36:4	774636224	1904662010	1660910889	1353644667	1278240864	9.26134e+08	3321999618	2121939361	3471782807	3008595480	1425311807	1037655053	0.038246	1.8216	1.95156	up
V471	DG 36:2	11709004975	15998245801	9891867590	9200536268	10243737944	3755818093	37321986400	30617287837	21702125309	26022332619	17316162138	23678786783	0.00068384	2.5767	8.40998	up
V473	DG 36:2	1213198599	2221883734	1173689481	1435034740	1359632763	7.922e+08	4333923420	4949208183	2518080374	4612150393	2455572598	4706336235	0.00394775	2.8766	3.31498	up
V475	DG 36:4	380024260	6.02767e+08	5.57551e+08	5.88201e+08	5.54624e+08	4.1675e+08	1323291374	7.45946e+08	1678400242	1596093410	7.95582e+08	4.88255e+08	0.016928	2.138	1.41267	up
V477	DG 36:1	1303233755	1214654242	7.4334e+08	1249662161	9.69575e+08	5.64579e+08	2828227488	2749015554	1125131865	2471235782	1144389912	2089385177	0.010362	2.0525	2.08826	up
V479	DG 36:3	6.54341e+08	2.64559e+08	211948218	2.75201e+08	2.41414e+08	3.34423e+08	1295181964	1217114436	6.51997e+08	1720966192	1068605827	1214119797	0.00648531	3.6167	1.92634	up
V481	DG 38:6	1.09616e+08	2.34056e+08	1.58978e+08	1.82634e+08	1.32355e+08	137552158	2243457033	1655048468	1867832447	2029938672	9.62219e+08	6.79118e+08	0.00023797	9.8803	2.48387	up
V482	LPC O-27:8	1315675769	1226231367	1051430727	2402028190	1926081422	1324710183	324457	71447.1	187625	7.09207e+06	743538	794893	0.00394775	0.00099653	2.49719	down
V485	DG 36:2	9043487705	12095086539	10623105431	10712956414	10675060852	5085947043	20810889181	19962063321	19145024700	21140632401	18620580443	20119273647	2.5029e-06	2.0571	6.79266	up
V488	DG 38:5	1.52696e+08	2.36707e+08	1.79544e+08	1.31013e+08	1.82474e+08	6.55561e+07	2027306026	1722592722	1421395380	1027325801	1149788998	2087930136	1.6265e-05	9.954	2.47091	up
V496	DG 36:1	3145106699	2915535326	2341290856	4418531944	3126555731	1796699501	5627555301	5889569096	3498563911	5983962242	3313957060	5104661216	0.0095861	1.658	2.80452	up
V497	TG O-38:4	2.07929e+08	2.99533e+08	2.03574e+08	2.56931e+08	2.30287e+08	4.57567e+07	6.63638e+08	8.62189e+08	6.74054e+08	1137109807	4.40578e+08	4.47094e+08	0.0014047	3.396	1.45791	up
V525	DG 38:7	1.49732e+08	153621838	7.7797e+07	6.02072e+07	1.1394e+08	5.53258e+07	4.89547e+08	5.45156e+08	5.93491e+08	8.20058e+08	3.49682e+08	2.20847e+08	0.00090636	4.9438	1.29482	up
V533	DG 38:6	2200978940	4184438335	2749734715	3306341924	2507591344	2424624375	36104455310	26624883853	30772434254	36258456803	16328900877	12274150061	0.00020502	9.1151	10.1398	up
V535	TG O-38:6	1.86229e+08	3.33137e+08	2.78492e+08	3.3755e+08	1.88711e+08	2.22601e+08	2709976168	1745889096	2491014845	3459941876	1816928261	1765590698	2.4778e-05	9.0445	3.02177	up
V536	DG 38:6	4.06799e+07	7.44812e+07	5.39051e+07	5.77121e+07	4.71419e+07	6.3293e+07	4.82988e+08	3.87377e+08	9.20505e+08	6.84251e+08	2.12658e+08	4.67282e+08	0.00088791	9.3563	1.33374	up
V540	TG O-38:5	2.28691e+08	173121772	7.5473e+07	130872785	4.01212e+07	1.06969e+08	6.39202e+08	4.39989e+08	4.95898e+08	9.8518e+08	319328123	162577547	0.0096164	4.028	1.2208	up
V541	DG 38:5	1.24026e+08	2.04115e+08	1.70394e+08	5.61679e+08	1.4776e+08	4.4464e+08	1726300093	1646638890	2297120173	2431393804	1136516819	3028478397	9.9683e-05	7.4225	2.75125	up
V548	TG O-38:4	2.83568e+08	3.04166e+08	2.26493e+08	4.27778e+08	4.50567e+08	1.16802e+08	1145320349	8.74164e+08	457756389	7.5922e+08	7.39909e+08	1762774644	0.0066339	3.1719	1.54518	up
V549	DG 38:4	2176746503	3052405807	2006347444	2412670300	2290664761	4.68338e+08	5551967734	7329248141	5630177933	8844777863	3817776155	3939356613	0.0014612	2.8301	4.04871	up
V552	PEt 31:0	1374653453	1521598854	1179185443	1344450053	1123239963	1219017511	10906300861	7812199105	10268731425	12432880095	7141296364	4930358884	5.1945e-05	6.8914	5.77989	up
V553	DG 38:3	3.11669e+08	3.99274e+08	5.81356e+08	6.85615e+08	5.87871e+08	2.79843e+08	1035654423	9.86622e+08	7.83165e+08	9.65249e+08	651956877	9.26652e+08	0.00094776	1.8798	1.31336	up
V554	DG 38:3	2251879402	2572871486	9.76674e+08	1544638687	1353695955	3.33376e+08	7119290071	6734663182	4889911447	6977879314	3936736039	9.15581e+08	0.0062651	3.3847	3.97052	up
V555	DG 38:5	1.75378e+08	1159075132	1561967742	9.77129e+08	2221052183	3.13502e+08	9.392e+06	2.25734e+06	2.08913e+06	3.18219e+07	4.52045e+06	7986.84	0.00394775	0.0078165	1.93852	down
V556	DG 38:5	3.03998e+08	1.64432e+08	148209841	4.95308e+08	1.07199e+08	4.88317e+08	1303503058	1313094968	1919845316	1974686017	1136785290	2810744009	0.00026736	6.1253	2.47693	up
V559	DG 38:2	1979943958	1773476000	7.23353e+08	1377569981	1214294630	272600837	7851193411	5920910320	3121805831	5265488644	3804764171	4429747172	0.00039932	4.1402	4.1306	up
V562	DG 38:4	1.96414e+08	199569731	208664975	2.98239e+08	3.99837e+08	1.69341e+08	860523015	677536871	4.01566e+08	6.53485e+08	9.62016e+08	1843160478	0.010275	3.6672	1.54368	up
V564	TG O-40:7	2201881946	2629646556	1860545522	2294299475	1970013345	5.37818e+08	4683715030	5915194406	5126182592	7632922570	4036291329	3897783742	0.00044141	2.7224	3.78914	up
V565	TG O-40:7	437730594	4.84415e+08	3.14533e+08	3.97539e+08	3.33094e+08	3.84539e+08	9.67009e+08	1279176700	8.83994e+08	1674854554	8.35353e+08	9.57996e+08	0.00035329	2.8056	1.7415	up
V568	TG O-40:7	4.65661e+08	2.93751e+08	2.80726e+08	2.42281e+08	4.03008e+08	1.12338e+08	7.36074e+08	9.41851e+08	8.10478e+08	8.51517e+08	6.23217e+08	4.49294e+08	0.00058482	2.4544	1.37079	up
V576	DG 38:3	3.29165e+08	7.05936e+08	6.92756e+08	7.63082e+08	6.62875e+08	3.32604e+08	1118688490	1082482251	9.80678e+08	1092721252	8.29697e+08	1218715059	0.00394775	1.8136	1.38336	up
V577	DG 38:3	4.54831e+08	3.3979e+08	2.93587e+08	4.70916e+08	3.84581e+08	1.7715e+08	5.21105e+08	5.98721e+08	470313864	5.99779e+08	6.54084e+08	1267926102	0.00648531	1.9388	1.02716	up
V578	TG O-38:3	2169913856	1891443053	9.66734e+08	1720736962	1409462974	3.62542e+08	6506816658	6260619916	5115242556	6991044818	4485265623	1123423950	0.0025736	3.5774	3.98855	up
V582	DG 38:2	2342643095	1919005427	9.43244e+08	2450877039	1649225460	659548870	7041489378	5940020207	4463871411	6146181518	4975218522	5735513223	6.6781e-06	3.4424	4.32611	up
V586	MePC 27:3	2.56527e+07	2.83799e+08	4.25217e+08	2.93682e+08	5.44698e+08	2.35411e+08	3.48233e+06	2.66094e+06	154099	1.35376e+07	6332.15	0	0.00394775	0.010971	1.05338	down
V594	PG O-30:1	3.89669e+06	3.96597e+08	4.59069e+08	4.33057e+08	6.81332e+08	2.80184e+08	24066.4	28297.2	23539.5	2.58351e+06	149257	151800	0.00394775	0.0013133	1.16907	down
V604	DG 40:7	1275753424	6.65313e+08	8.0737e+08	7.14588e+08	9.21296e+08	2.93185e+08	2953623606	3628573355	1930313254	3011896884	12040347459	8427162741	0.019548	6.8395	3.80407	up
V606	DG 40:7	10846437556	6877334985	6510767294	5608985240	9907043233	2480664486	15228631838	20453729950	17116037952	19224158262	12936662626	10195745266	0.001347	2.2532	6.12486	up
V611	NAGly 41:4	1.47413e+08	2.84934e+08	3.33411e+08	2.60615e+08	1.87386e+08	2.11777e+08	5.3908e+08	7.76127e+08	4.67192e+08	6.36254e+08	3.40072e+08	6.2086e+08	0.00070031	2.3707	1.15269	up
V612	TG O-40:6	1487014611	4.6358e+08	4.22918e+08	6.15862e+08	6.78556e+08	2.9143e+08	2076181917	2301642346	1772093255	2354372462	1899576130	2986515049	8.6168e-05	3.382	2.5686	up
V613	DG 40:6	1364749572	3269282851	3278036567	3506514972	2170531120	2175690336	6545179599	7113658706	7299575638	6257816363	3415827482	5073725360	0.00073224	2.2649	3.68482	up
V614	DG 40:6	1.66876e+08	1.32722e+08	1.02041e+08	4.42052e+08	9.94522e+07	1.54632e+08	6.1228e+08	3.84035e+08	5.01441e+08	1780437227	2.45458e+08	3.65092e+08	0.0163092	3.5424	1.17802	up
V622	DG 40:5	1969993217	1883863557	1427100035	1676217760	1356334521	8.02134e+08	3417696515	4474618511	3042550837	4038141792	2271897982	2480029983	0.0011527	2.1639	2.80218	up
V626	DG 40:7	5017280166	1775066657	1839556301	1882795200	2556813401	915361140	5826346613	7036437714	6903106241	7695397407	6506017910	4380293656	0.00028925	2.7417	4.09919	up
V631	DG 40:4	1.14678e+08	9.66781e+07	6.7589e+07	1.07471e+08	7.87152e+07	2.67036e+07	1704050490	1805519197	9.69607e+08	1710774928	1221714887	1611369685	1.0628e-06	18.346	2.56038	up
V636	TG O-40:6	1.297e+08	2.27628e+08	2.64819e+08	2.39151e+08	1.50651e+08	2.00398e+08	4.55182e+08	6.74355e+08	4.36134e+08	5.87754e+08	3.45824e+08	6.41054e+08	0.00022457	2.5903	1.15981	up
V637	DG 40:6	1428854344	2711389142	2772000123	3275418333	1925986184	2005131742	5837371498	6392928214	6668498756	5875848695	3926429762	5279799003	4.6978e-05	2.4068	3.77731	up
V638	DG 42:9	8.07395e+07	7.68937e+07	6.64963e+07	8.31467e+07	6.51998e+07	5.54686e+07	8.04529e+08	2.27434e+08	8.10219e+08	1373232310	3.46531e+08	185728325	0.014542	8.7574	1.39141	up
V641	TG O-42:8	1579070455	1428381924	9.09819e+08	1619667006	1099168897	8.61233e+08	2336491170	3372869725	2695647524	3449782524	2293589776	2412922476	0.00014283	2.209	2.5717	up
V643	DG 40:5	8.71583e+07	7.76159e+07	8.64161e+07	1.2313e+08	6.92489e+07	7.04323e+07	2.41337e+08	3.11045e+08	3.78638e+08	3.2191e+08	2.292e+08	5.88723e+08	0.00074409	4.0289	1.01322	up
V653	DG 40:4	1.18596e+08	9.92616e+07	6.35858e+07	110683270	6.81359e+07	3.02399e+07	1534234655	1673964251	1022560552	1561450226	1316268637	1683815359	1.179e-07	17.925	2.52629	up
V705	DG 42:7	8.89967e+08	6.76117e+08	4.05724e+08	6.89349e+08	6.61558e+08	1.96193e+08	2611284916	2149007850	1779265438	2989581461	1631305454	755013562	0.0019774	3.3861	2.47442	up
V710	DG 42:7	3.56946e+08	245500331	167357708	2.4564e+08	193432616	7.39768e+07	9.55196e+08	1154119872	9.39607e+08	1099721357	843356287	7.04274e+08	2.5865e-06	4.4403	1.83469	up
V717	TG O-42:6	3.27578e+08	2.1682e+08	130155088	2.16944e+08	1.42143e+08	1.27613e+08	1313486143	9.94714e+08	6.77234e+08	1058997892	6.71206e+08	512511041	0.000326	4.5022	1.74355	up
V733	DG 42:7	8.10298e+08	5.17831e+08	3.30865e+08	580010539	4.93752e+08	1.90713e+08	1788331695	1465849075	1330455590	2061986873	1426306020	617937232	0.0013064	2.9728	2.03804	up
V746	TG O-42:6	226487243	1.34234e+08	1.0067e+08	1.76785e+08	119350975	9.67005e+07	7.10782e+08	6.30065e+08	4.88249e+08	7.36893e+08	5.2641e+08	376998474	2.8641e-05	4.0614	1.4108	up
V749	PC O-32:0	1172179931	1265599586	1218445918	1062678395	1309314422	1226473037	1003436776	9.78018e+08	8.14485e+08	8.68727e+08	683083450	4.3305e+08	0.0013223	0.65899	1.28027	down
V754	PE O-36:6	3611480647	3807760815	4699675950	5055616419	4201143302	5679443792	1967210071	2323830234	2971481328	2774844646	3552004762	3399494627	0.0020658	0.62794	2.71689	down
V767	Co 8:0	1055904069	1225187954	1290835623	2160014714	2214696949	1762678462	9.01733e+07	6.76151e+07	9.16158e+07	1.35014e+08	4.48904e+07	258313028	2.6412e-05	0.070821	2.48754	down
V775	PC 32:2	6085241605	4810321415	4955668864	4372779014	5869179974	7852985169	1881389284	2548623435	2384201092	3220639368	2576787273	3229815747	0.00028686	0.46666	3.54124	down
V834	PC 33:2	2478419884	1722591840	2073978263	1683389673	1877002504	2256633154	8.05215e+08	6.97193e+08	8.51299e+08	949705309	6.46429e+08	6.10735e+08	3.9212e-06	0.37716	2.34939	down
V838	Co 8:0	1995086840	2220628623	2511952519	3838072983	4074514695	3145380327	1.89738e+08	1.67815e+08	1.99519e+08	2.75126e+08	1.00998e+08	4.98551e+08	1.7669e-05	0.0805	3.36708	down
V845	PC 33:1	2700747119	1457888996	1385916515	9.33953e+08	1333902849	1618267517	9.98833e+08	992861919	1065101789	1283234111	9.77896e+08	6.52944e+08	0.049235	0.63313	1.31806	down
V862	PC 34:5	2.50612e+08	435929039	5.4569e+08	3.58447e+08	5.24433e+08	898677706	8.47871e+07	1.4425e+08	1.90661e+08	2.32035e+08	1.36233e+08	1.3622e+08	0.0038806	0.30665	1.16209	down
V882	PC 34:3	6066528986	9192500052	9435003496	6566654926	5620400790	3536427724	3311197386	5331912278	4533829943	3455003765	3006687875	5478028559	0.031137	0.62143	2.96756	down
V883	PC 34:3	14027137550	9040929768	9419841129	8641087061	10061685853	15527904626	7695699244	6073451467	5861989785	6835146297	6119284733	8778840311	0.0078801	0.61998	3.8561	down
V888	PC 34:2	9.98462e+08	8.08555e+08	7.18232e+08	8.39842e+08	8.81466e+08	3071865738	4.25137e+08	3.69238e+08	4.81341e+08	5.03269e+08	3.52021e+08	1774444554	0.037373	0.53365	1.60417	down
V930	PC O-36:5	6.62981e+08	1351697811	1135546280	7.40813e+08	9.20053e+08	1529754573	7.32511e+08	1060864793	6.09969e+08	7.34767e+08	3.4919e+08	4.3191e+08	0.043233	0.61809	1.01718	down
V932	WE O-53:13	8.27075e+07	2.80813e+08	3.28803e+08	1.47471e+08	2.38592e+08	1.09262e+08	3.67916e+08	3.71214e+08	6.19894e+08	9.82628e+08	4.83325e+08	5.01395e+08	0.0058364	2.8008	1.10118	up
V941	PC 35:4	1407911793	1220150653	1409321243	1457983047	1643764548	1626644265	8.49376e+08	7.89483e+08	1069957003	1108333858	8.41898e+08	1019034673	0.00012136	0.64776	1.46272	down
V973	PC 35:2	3689486451	3501641582	4763490638	2555477167	3265706646	3444702155	1786758246	1653226698	1981783080	1954106939	1297687891	1146517115	0.00016309	0.46276	2.87598	down
V981	PC 35:1	2272534659	1407853459	1644866416	1159112415	1657147583	1967919846	1034705074	9.53365e+08	1192979830	1319386528	1136974267	7.93578e+08	0.0063539	0.63614	1.47549	down
V993	PC 36:6	2508199986	1795335008	1862167267	2285764874	3429824934	4170836117	4.08705e+08	4.65274e+08	8.81244e+08	1361628205	1016932945	1494275991	0.0021924	0.35061	2.64273	down
V999	PC 36:5	16632143466	23949957609	38050939764	32688695403	20098728007	25411554112	18450207820	19634297278	23560463583	14503161074	13300628130	13324241992	0.033671	0.65531	5.17334	down
V1027	phSM 39:3	4.60733e+08	480400005	5.45326e+08	6.03347e+08	6.57037e+08	352420783	8.46426e+07	7.36133e+07	1.01859e+08	151578405	6.0638e+07	2.91413e+08	0.00394775	0.24643	1.2736	down
V1083	PC 37:6	1594717722	668825806	935087084	1212116065	9.69611e+08	1238363064	3.99661e+08	2.921e+08	4.31934e+08	5.29758e+08	3.90962e+08	3.58026e+08	0.00037438	0.36298	1.65228	down
V1089	TG 46:2	2.45713e+08	5.7667e+08	3.45473e+08	3.16097e+08	4.18979e+08	4.75487e+08	1096278847	8.59871e+08	1020432197	2508941682	1229032843	6.86086e+08	0.00394775	3.1116	1.70744	up
V1102	TG 46:1	3.93416e+08	5.47047e+08	2.8525e+08	3.26374e+08	4.24061e+08	6.87107e+08	1312187574	1011293786	9.04315e+08	2854092271	1468191435	1115166352	0.00394775	3.2536	1.9037	up
V1105	Co 9:0	3935404420	3002432730	3502082499	3958948917	3588703412	5364879115	8.49936e+08	8.61224e+08	9.37436e+08	1092561589	7.24238e+08	1117482298	4.6012e-06	0.23907	3.58893	down
V1110	PC 37:4	2591134755	4050347879	4739553885	3460418642	3702483024	3468220301	2728249819	2561804096	2742164735	2809793668	1504571062	1477396037	0.0163092	0.62802	2.23516	down
V1113	PC O-38:4	4.69536e+08	1295912878	8.9197e+08	1107242247	1001750929	1221630958	7.02422e+08	8.80525e+08	5.20482e+08	6.93702e+08	4.63716e+08	4.42192e+08	0.021485	0.61841	1.00611	down
V1144	PC 38:7	2.66234e+08	4.94971e+08	3.96411e+08	2.62179e+08	3.10101e+08	3.0522e+08	8.59936e+08	727355036	7.83151e+08	7.22331e+08	8.06108e+08	441408854	0.00028303	2.1327	1.24987	up
V1146	PC 38:7	1190363230	2764124808	3624169277	1746600983	3257886961	3875269992	1.79612e+08	2.67239e+08	5.36109e+08	5.01127e+08	3.15304e+08	1.61562e+08	0.00027319	0.11915	3.17115	down
V1150	PC 38:7	19391859082	8381000500	6787753442	7787114501	19842660542	19263399040	2452463433	2395127532	4425172304	6859534940	6976283135	4473831831	0.0104056	0.33863	5.5311	down
V1155	PC 38:6	17650334236	29164971593	26615946352	21589353971	28039193879	25238909561	11360823630	13992894251	14751134754	14094316006	14346961675	14453443779	0.00394775	0.55968	6.7462	down
V1156	PC 38:6	1292959440	3114300731	4101546710	3353795377	3837263346	4053222409	8.15937e+08	1352202019	1974710941	1460974857	2210527108	2598334106	0.011621	0.52714	2.49346	down
V1196	SM 42:3	1126675948	1862984008	1768642931	1472199221	2044355386	2185371896	1152683305	1058384995	1021773630	1072609254	7.6128e+08	4.65011e+08	0.0015573	0.52884	1.72402	down
V1208	PC 38:3	1690577825	4546636190	3242282328	5241249767	4191189847	2528325778	5679853563	6279077351	4763487530	4790235045	4671886316	10366187927	0.0163092	1.7048	2.81516	up
V1223	PC 38:2	3327357762	5.30917e+08	8.54182e+08	4.55026e+08	6.05384e+08	8.46899e+08	4.30582e+08	5.09504e+08	4.32541e+08	347310990	3.86038e+08	5.87706e+08	0.0163092	0.40691	1.2112	down
V1250	PEt O-44:7	5519138696	3422275434	3539582723	4170770971	3609708333	5362093269	2009425617	2020800282	2151698699	2214158634	1930524209	2571061845	0.00032411	0.50335	2.90356	down
V1261	TG 48:3	9.25332e+08	2764199080	2044202145	1416821367	2052373647	1413110720	2651129279	2532683320	3403493843	6042961611	3428733055	1741399940	0.043026	1.8651	2.13524	up
V1276	TG 48:2	2907617723	5072883199	3269173249	2841540803	4076715130	4269723759	7857342561	5862734710	7741278582	12976506285	8453951864	7252843177	0.0013724	2.2348	4.22821	up
V1290	TG 48:1	2989990809	2682581461	1630597789	1925411961	2350631604	3195752433	6987523730	4367281130	4313619437	9024992525	5704519178	5067079999	0.0013292	2.4003	3.7329	up
V1305	TG 48:2	2.69479e+08	5.235e+08	3.4417e+08	3.21694e+08	4.36524e+08	6.82814e+08	8.83282e+08	5.82588e+08	8.16478e+08	1052189723	9.14507e+08	1163198724	0.0010007	2.0992	1.40858	up
V1307	PC 38:7	2.44515e+08	4.12775e+08	4.24464e+08	3.61135e+08	4.83687e+08	5.31959e+08	3.37698e+07	4.30319e+07	5.3445e+07	5.8138e+07	4.9619e+07	3.55425e+07	4.8033e-06	0.11126	1.26227	down
V1308	PC 38:7	2204394585	1570315807	1009514257	2263149506	2275410997	2328656310	4.52318e+08	3.5535e+08	5.62901e+08	1001911589	1281645378	927775180	0.00648531	0.39325	2.10787	down
V1315	TG 48:1	2.14842e+08	2.45491e+08	1.70371e+08	1.90137e+08	2.23084e+08	4.023e+08	6.0717e+08	347744273	4.34775e+08	5.98724e+08	5.04424e+08	568969714	0.00648531	2.1171	1.06884	up
V1317	PC 40:9	5.52728e+08	1312009972	1185924313	1053172493	1366604212	1999815524	1.4959e+08	2.13146e+08	2.58372e+08	2.56209e+08	2.58788e+08	2.62727e+08	0.00394775	0.18725	2.0387	down
V1318	PC 40:9	3.5894e+08	2.94912e+08	257537460	2.83263e+08	3.57072e+08	5.37469e+08	4.63706e+07	4.40601e+07	6.07608e+07	6.17998e+07	6.17008e+07	1.79452e+08	0.00394775	0.21738	1.07881	down
V1329	PC 40:8	17329764719	20001363883	16057037635	18124708943	20783683839	14666062652	7283748290	5913842294	7504355340	8499162067	9327531496	11056374189	1.1905e-05	0.46357	6.41086	down
V1330	PE 43:8	5.08989e+08	7.11778e+08	3.85722e+08	5.91364e+08	6.26892e+08	4.79023e+08	1113911371	1159182393	1039956689	9.6852e+08	1100434563	7.6528e+08	8.9518e-05	1.8607	1.43193	up
V1342	PC 40:7	2.44984e+08	5.45491e+08	2.71854e+08	3.42032e+08	2.78254e+08	2.92557e+08	6.86731e+08	6.77007e+08	7.08691e+08	5.63875e+08	4.50497e+08	4.35543e+08	0.0104056	1.7833	1.01167	up
V1343	PC 40:7	8.7398e+08	9.38057e+08	943190190	935851411	1226102423	8.71579e+08	5.0068e+08	3.37789e+08	6.62537e+08	5.49253e+08	6.22206e+08	8.76972e+08	0.0104056	0.61316	1.21208	down
V1383	PC 40:5	1382767325	7.22222e+08	716969341	5.81378e+08	6.95721e+08	6.68312e+08	6.05657e+08	594297180	3.91715e+08	4.86543e+08	2.90437e+08	2.46933e+08	0.0104056	0.54864	1.12566	down
V1395	PG 40:7	251491914	3.24451e+08	3.77318e+08	5.05648e+08	5.17289e+08	6.06133e+08	6.53708e+07	3.27418e+08	1716040392	1597182096	2475802231	1856465743	0.04087	3.1128	1.69453	up
V1397	PC 40:4	2470034327	9.18381e+08	7.57224e+08	6.92892e+08	6.6416e+08	8.488e+08	5.81193e+08	7.12697e+08	6.52655e+08	5.48556e+08	3.78961e+08	5.13157e+08	0.0104056	0.5333	1.14192	down
V1430	MGDG 40:9	1281801981	8.56552e+08	8.69498e+08	9.75609e+08	6.2801e+08	697388923	1727092898	1822437666	2208937335	2582829587	2126398964	1909113256	2.2846e-05	2.3313	2.22917	up
V1444	PG 40:7	3.94242e+08	4537182196	2850460872	1820172092	2348920708	2418313355	264637586	4932501625	6324419397	6958691012	11836481798	7540486528	0.037544	2.6346	3.31023	up
V1453	TG 51:11	4.66895e+08	7.01339e+08	8.21713e+08	9.02091e+08	8.32566e+08	6.3494e+08	2.46929e+07	5.41172e+07	5.53781e+07	4.48438e+07	1.69995e+07	4.6411e+07	1.0404e-06	0.055612	1.73436	down
V1482	TG 50:2	4.25673e+08	8.45055e+08	7.09277e+08	1.94898e+08	659690433	2.65932e+08	1436700673	919525039	1126203826	1673011556	1159562870	9.72641e+08	0.0013433	2.3505	1.65767	up
V1486	PG O-43:7	3.73883e+08	4.97379e+08	6.25547e+08	8.11114e+08	6.47214e+08	572290823	2.13323e+07	4.78771e+07	4.58601e+07	4.65056e+07	1.704e+07	4.23344e+07	0.00394775	0.062638	1.53449	down
V1497	TG 50:1	2.81397e+08	5.89024e+08	4.27964e+08	6.06297e+08	6.35581e+08	118365303	1093113353	1304943966	1086253201	1866993489	1429180710	1167488694	0.00014026	2.9895	1.93172	up
V1502	PC 42:11	331210192	722948876	8.30781e+08	6.17349e+08	754174917	1226690566	1.12762e+08	1.82703e+08	1.9268e+08	1.58915e+08	1.69441e+08	2.50808e+08	0.00082467	0.23807	1.53366	down
V1509	MePC 41:11	9.19852e+08	1215147520	1230885571	1324374030	1255235082	9.30724e+08	7.06884e+08	6.72099e+08	8.18622e+08	8.7477e+08	9.2719e+08	5.65935e+08	0.0016814	0.66396	1.21377	down
V1511	phSM 44:4	3814436690	2665985882	2923294013	3731436739	3148482945	4171646427	1665803714	1734859209	1855628675	2101281836	1781288770	2316684990	0.0001768	0.56003	2.47529	down
V1519	PC 42:10	7063358115	10161856623	8579505507	8811960815	10639126354	9010022504	4300039933	5118471959	4712759507	5335560856	4467283232	5007876975	1.4689e-05	0.53334	4.21364	down
V1558	TG 51:4	8.12533e+08	9.37466e+08	9.58465e+08	5.2614e+08	6.38175e+08	3.21704e+08	3.66106e+08	2.84457e+08	441283239	5.41529e+08	3.42401e+08	1.79729e+08	0.013897	0.51389	1.2035	down
V1594	TG O-52:2	4.81456e+08	1.61976e+08	1.1529e+08	5.89229e+07	1.77128e+08	9.18069e+08	1.37734e+06	5.28779e+06	1.1551e+06	1.34456e+07	2.15819e+06	1.27665e+06	0.00394775	0.012913	1.00405	down
V1627	TG 52:7	4.9682e+08	7.18594e+08	1007815468	5.69277e+08	3.72974e+08	5.3969e+07	1.21429e+08	2.01311e+08	198417570	2.81719e+08	1.5121e+08	4.5566e+07	0.0211	0.3105	1.20019	down
V1630	TG 52:7	1.24157e+08	1.78572e+08	2.20292e+08	1.53306e+08	3.55681e+08	2.90922e+08	8.65439e+08	1053725715	9.5582e+08	1509777842	1026609603	3.56737e+08	0.00077004	4.3601	1.72211	up
V1677	TG 52:5	1198238247	2043348093	2078441845	1532192057	1534803785	6.78834e+08	1054274970	7.86313e+08	1204692197	9.69477e+08	9.30588e+08	7.27419e+08	0.032078	0.62573	1.47192	down
V1694	PC 44:12	2233597424	2584537294	2056945349	2657048335	2861476080	2775045524	8.96838e+08	1062979276	1271509186	1122411669	1172822858	1997887495	9.3726e-05	0.49605	2.32126	down
V1697	TG 52:1	7707862497	2124078844	1498333044	2202991326	2247250410	2000179506	5765590503	5843905035	3429645997	8961882512	5135308567	5317688677	0.037373	1.9377	2.97369	up
V1711	PC O-44:4	5.97797e+08	3.47606e+08	4.25211e+08	4.77428e+08	4.17696e+08	2187433720	1.31939e+08	1.68136e+08	138677001	1.22823e+08	1.22979e+08	7.55808e+07	0.00394775	0.1707	1.44358	down
V1738	TG 53:5	4.97031e+08	8.22474e+08	9.67814e+08	5.53712e+08	6.75103e+08	1.59865e+08	3.54133e+08	2.02529e+08	3.87399e+08	3.33596e+08	2.78024e+08	1.02174e+08	0.020972	0.45099	1.16887	down
V1743	SM 48:8	3.3621e+08	3.27607e+08	4.5054e+08	4.70785e+08	3.90646e+08	2.68826e+08	7.46631e+06	3.0685e+07	3.3458e+07	2.15556e+07	1.31289e+07	3.12997e+07	6.7412e-07	0.061299	1.25232	down
V1751	TG O-54:4	4.03388e+08	2.01798e+08	1.61932e+08	9.85956e+07	2.47304e+08	1109914266	0	9010.28	47338.8	835411	52373.7	0	0.00388491	0.00042473	1.12084	down
V1805	TG 54:7	1202735920	1534051620	2829943311	1594719763	1337935737	7.47588e+08	5.70475e+08	8.26211e+08	8.45217e+08	1129924677	9.19188e+08	2.1472e+08	0.030525	0.48727	1.67229	down
V1806	TG 54:7	14030228216	8079072354	10362989252	5519827571	4553314734	1898334865	1694243463	2414378408	2378142749	2605403217	2073654861	6.17516e+08	0.013007	0.26513	4.69714	down
V1807	TG 54:7	2642616581	1764809047	1997533009	2999573574	4413204102	3358500312	8254597502	13080765707	10731944684	13240499680	12417910694	6708986684	5.4646e-05	3.7514	5.75521	up
V1813	TG 54:6	4846552857	10428711556	10635867944	7878916788	7006454430	5265151448	6215244285	4753059264	5851219426	5678409401	4751190773	2705468627	0.039699	0.65032	3.0607	down
V1818	d5-TG 54:8	2571139754	5975059134	6634429462	4889751608	4050564378	2850058393	3545050892	1965685528	2717892044	2387484764	1881249697	9.99655e+08	0.014196	0.50043	2.85808	down
V1827	TG 54:7	2760496220	1830867107	1907928567	1609963936	1814712375	7.38211e+08	7.98775e+08	5.13083e+08	9.47858e+08	5.03688e+08	5.78276e+08	2.23257e+08	0.0019215	0.33435	2.27429	down
V1829	TG 54:7	3.78198e+08	2.60207e+08	2.11485e+08	2.84519e+08	3.94847e+08	8.12692e+08	9.10151e+08	2076232082	1256303023	2068218799	2326743150	1935201339	0.00394775	4.5146	2.39209	up
V1853	TG 54:3	18422956947	39082177296	30022313318	25388628882	29590256760	9292189493	46544183607	41951494301	39898295307	36192299035	33574186904	31400137786	0.022403	1.5123	7.13249	up
V1854	TG 54:3	9.605e+07	2.08394e+08	162887852	1.47674e+08	1.94595e+08	4.29335e+07	1672677876	246758961	2.71481e+08	2284482026	3.46e+08	3.40464e+08	0.00394775	6.0547	1.51782	up
V1855	TG 54:3	17991591957	33289068236	28466716287	24255790661	30154086081	9094186377	45454478904	40986463763	39074451160	35386991022	32075272354	31729133295	0.0098528	1.5686	7.37276	up
V1858	TG 54:5	4.70218e+08	2024621740	1069988762	1688916695	1551905564	1422282765	1303480910	8.01806e+08	6.74549e+08	5.83425e+08	8.05928e+08	5.52421e+08	0.040068	0.57385	1.20518	down
V1864	TG 54:2	12301144025	6086115736	4441556473	5795340666	5846444892	2836430261	17667809611	16732451876	11455373725	22912232343	14208805824	14281898975	0.0007152	2.607	6.53631	up
V1879	TG 54:3	1750467243	6.83704e+08	3246114694	7.74829e+08	7.71758e+08	1.93567e+08	3555503136	3381637147	3639791951	2738563714	3259088692	3164660541	0.0014173	2.6601	2.67246	up
V1881	TG 54:3	1.63032e+08	782463273	1.24014e+08	133761796	1.39055e+08	2.16646e+07	1397057327	1081649232	1411879064	1845778443	1509973758	1620843346	0.00394775	6.5009	2.32451	up
V1888	TG O-56:7	2.69714e+08	4.2041e+08	2.72447e+08	1.49132e+08	3.84525e+08	1602160731	6884.27	5.01896e+06	79988	34321.6	4.27692e+06	1.1495e+06	0.00394775	0.0034103	1.33105	down
V1891	TG 54:2	2196549236	1672796714	1552135230	1745021855	1644753860	8.12991e+08	2862516065	2999399167	2568129256	3348461545	2814164178	2915849059	9.7361e-05	1.8192	2.39128	up
V1908	TG O-56:5	449105374	2.82425e+08	1.96398e+08	1.08924e+08	2.6859e+08	1598808755	0	718368	1.05863e+06	0	0	121371	0.00369988	0.00065366	1.27019	down
V1928	TG 55:3	4.64485e+08	536777488	4.23669e+08	4.28694e+08	536845812	1.35142e+08	8.32402e+08	6.60693e+08	8.66214e+08	1534483703	6.85999e+08	4.37643e+08	0.0163092	1.9866	1.22712	up
V1934	d5-TG 55:5	3.90922e+08	7.73636e+08	1025586169	8.03749e+08	8.76706e+08	1.02792e+08	1254739614	1145045756	1416875376	1892833300	1296930081	1242791860	0.00394775	2.0761	1.62977	up
V1939	TG 55:2	5.18263e+08	5.33244e+08	4.81432e+08	4.93502e+08	5.34184e+08	5.37558e+08	8.00668e+08	6.93125e+08	7.66167e+08	8.45946e+08	814734888	7.74788e+08	4.9284e-07	1.5155	1.0931	up
V1947	TG 55:1	4.44342e+08	2.43313e+08	1.79691e+08	3.09296e+08	2.94456e+08	2.61342e+08	5.81511e+08	4.87033e+08	4.43242e+08	6.73195e+08	5.06582e+08	4.97305e+08	0.00061963	1.8407	1.00906	up
V1958	TG 56:7	25276390626	7765058629	10338540904	11707561297	12556592136	11168687442	21401433299	32909796350	22870515326	22534188924	21049424764	20080155234	0.037373	1.7871	6.00082	up
V1983	TG 56:7	2568655367	4.47891e+08	1166568475	1451243564	1393778091	2174424508	1905723394	2784266753	2177264076	2060156759	2601214468	2725858658	0.033829	1.549	1.62933	up
V1987	TG 56:4	5801483761	5868959781	4361930087	5253310853	4817438046	3013493682	8221613340	8655389613	6725323974	8775293971	6615210279	6533754227	0.001288	1.5636	3.52966	up
V2002	TG 56:3	4280942562	4250744599	2338106644	3216480240	3287562258	1036489472	14218799796	10367722375	8810522156	14915865419	9708467425	9385301749	4.371e-05	3.6614	6.09365	up
V2033	TG 56:3	1001729507	1311362332	901041689	1099400765	1040474325	3.19758e+08	2564249646	2199683770	2202699978	2283210248	2241783838	2204232979	0.00394775	2.4139	2.45208	up
V2034	TG 57:7	2.73797e+08	1.44716e+08	1.54145e+08	2.04624e+08	4.61214e+08	3.16593e+08	5.17954e+08	1219171849	7.3553e+08	1229636470	1348948983	1103442896	0.00029837	3.9578	1.75878	up
V2044	TG O-58:6	2.37395e+08	1.49555e+08	1.25614e+08	6.83736e+07	1.67697e+08	1068538598	70789.8	1.1514e+06	302364	15809.7	225573	193265	0.00394775	0.0010782	1.0075	down
V2059	TG 58:11	1065086163	7.02903e+08	7.61376e+08	7.89444e+08	6.35194e+08	4.26724e+08	1008368907	2061055102	1757097297	1910787313	1865910051	4.83635e+08	0.015493	2.0743	1.62584	up
V2067	TG 58:10	2694077647	2033983931	1738684899	2459589344	2163479092	2283873438	2518603037	4487721399	3936394241	3814974892	3658228409	2681403752	0.0035954	1.5775	2.14242	up
V2068	TG 58:10	3.57709e+08	4.48145e+08	219592724	3.64928e+08	3.73017e+08	2051963416	2260934071	4027093841	7.72579e+08	5.90121e+08	3287934275	6.09786e+08	0.0163092	3.0268	1.79447	up
V2082	TG 58:11	4.21171e+08	2.48377e+08	1.91915e+08	2.95539e+08	2.11179e+08	1.91138e+08	4.68427e+08	747631603	8.03842e+08	6.15671e+08	8.52858e+08	3.66759e+08	0.001348	2.4724	1.17429	up
V2088	TG 58:8	7817056824	9125210522	9892590641	9857232792	12295701336	4028121591	15369383280	21033658757	16095342489	14847957174	15038669062	8577867578	0.0094997	1.7158	4.96221	up
V2094	TG 58:10	4.23904e+08	3.15111e+08	2.36392e+08	4.28194e+08	3.37069e+08	6.76844e+08	4.22138e+08	7.15586e+08	7.16415e+08	6.09746e+08	6.56805e+08	9.87367e+08	0.016057	1.6993	1.07857	up
V2096	TG 58:10	1481248167	1346078111	2071660339	1842055606	1596746724	5.60294e+08	1271826685	927586850	9.28422e+08	1080149027	7.27756e+08	2.90625e+08	0.03639	0.58736	1.55555	down
V2102	TG 58:7	2821008106	1265905897	1253372899	1609122269	1670879432	1768008196	2561700733	4734573396	2490067352	2686477346	2885178916	2364017643	0.0249747	1.706	2.00296	up
V2103	TG 58:7	3.41707e+08	1.69294e+08	1.5553e+08	201259958	2.59401e+08	1.28761e+08	1629697420	3026315401	3.04921e+08	1717514569	1922000748	2.83875e+08	0.014113	7.0738	2.14191	up
V2119	TG 58:5	1932294263	1031619673	746789719	1113059922	1087177126	1597403532	1958110404	2475841535	1518096673	2790913343	1980122932	1938361788	0.0071331	1.6863	1.78315	up
V2128	TG 58:4	8.14439e+08	3.52685e+08	2.03925e+08	2.84219e+08	3.04636e+08	4.37561e+08	8.9939e+08	8.5697e+08	5.42747e+08	1375639320	6.9718e+08	5.25999e+08	0.023508	2.043	1.21722	up
V2139	TG 58:3	5.1408e+08	9.67134e+07	5.90278e+07	7.67972e+07	8.96717e+07	1.49569e+08	6.13631e+08	4.4314e+08	2.92346e+08	9.85757e+08	3.61661e+08	2.44033e+08	0.0249747	2.9827	1.06475	up
V2159	TG 60:13	4.80885e+08	3.61035e+08	3.9932e+08	4.32956e+08	4.39171e+08	1.12503e+08	715079335	2225353813	1784317440	1948758936	1761919020	3.9801e+08	0.0249747	3.9685	1.97895	up
V2166	TG 60:12	5503639297	1965731031	2150908025	3662437351	2498302105	9.93006e+08	7882115045	14100545281	13475848604	12183436242	12822482293	4190865720	0.00092337	3.8545	5.5527	up
V2172	TG 60:11	2.88842e+08	2.0561e+08	2.00491e+08	2.59152e+08	1.98289e+08	3.2358e+08	4.91837e+08	7.86203e+08	8.07796e+08	6.64836e+08	7.11727e+08	1325728750	0.00082569	3.2441	1.4934	up
V2177	TG 60:13	5.69135e+07	1.42651e+08	2.00591e+08	2.27604e+08	2.05632e+08	6.9462e+07	4.26841e+08	9.43705e+08	1037920605	9.60918e+08	1089726374	3.47848e+08	0.00075417	5.3242	1.55222	up
V2181	TG 60:10	1135375180	1492206456	1407668440	1720785498	1611928670	6.68321e+08	2082216857	3826708041	3735731973	3353483146	3064222692	2131540121	0.00069057	2.264	2.5624	up
V2182	TG 59:3	5.61918e+08	1055507958	1006141982	9.92939e+08	1064039792	3.77726e+08	1425821028	1303114857	1378554814	1302412758	1176503788	1216380414	0.00394775	1.5426	1.31808	up
V2183	TG 60:12	1252204660	5.51392e+08	5.12989e+08	9.05887e+08	6.22833e+08	3.95256e+08	1916528176	2626182915	2582673873	2382712907	3185782262	1815719031	3.5853e-05	3.4216	2.64911	up
V2192	TG 60:9	1.87361e+08	2.62276e+08	2.50224e+08	3.2595e+08	1219878316	2.15684e+08	1384974281	1987623890	1717769996	1689851996	1564747384	9.9811e+08	0.00648531	3.7959	2.15091	up
V2193	TG 59:2	4.62788e+08	2.41255e+08	1.93054e+08	3.11135e+08	271556539	1.51675e+08	5.86985e+08	6.37592e+08	4.76654e+08	8.88897e+08	5.95371e+08	674065517	0.00041251	2.3657	1.24749	up
V2208	TG 60:10	1.70559e+08	2.32091e+08	2.44414e+08	3.10979e+08	2.82621e+08	2.89584e+08	3.93868e+08	6.27402e+08	6.15166e+08	5.18002e+08	5.64813e+08	5.08867e+08	3.8853e-05	2.1095	1.0858	up
V2242	TG 60:6	3.56268e+08	2.34654e+08	2.02669e+08	3.74578e+08	2.80479e+08	3.82511e+08	4.29421e+08	643251441	6.03384e+08	5.36229e+08	6.20735e+08	7.37477e+08	0.00026652	1.9499	1.10901	up
V2269	TG 62:13	1888463068	1560603784	2206827929	2193266707	2747744614	7.57441e+08	3155975151	7967428110	5843749430	5266760867	5302739483	1206985940	0.015261	2.5315	3.13272	up
V2273	TG 62:12	8.4953e+07	7.99159e+07	7.16373e+07	1.18624e+08	7.85027e+07	8.81811e+07	2.8527e+08	3.16399e+08	1084226588	1182789427	9.53074e+08	3.2455e+08	0.0059553	7.9459	1.40068	up
V2274	TG 62:12	4.32371e+08	1.89713e+08	2.59489e+08	3.08233e+08	2.79374e+08	1.71048e+08	5.35356e+08	1149140113	9.39132e+08	7.37932e+08	8.68986e+08	5.93464e+08	0.00037426	2.9411	1.43182	up
V2275	TG 62:12	4.34124e+08	3.73206e+08	4.13349e+08	5.96435e+08	4.69612e+08	3.56741e+08	1021330161	1816197432	1429312661	1578015076	1272391810	1.69487e+08	0.0088557	2.7565	1.68546	up
V2279	TG 62:11	1.59945e+08	1.81149e+08	1.59322e+08	2.7003e+08	1.83659e+08	3.35531e+08	3.53403e+08	7.05043e+08	5.83179e+08	5.3577e+08	4.63564e+08	3.26777e+08	0.001637	2.3012	1.0291	up
V2281	TG 62:13	5.32183e+08	4.39901e+08	5.69659e+08	6.27829e+08	7.06002e+08	2.89177e+08	9.07177e+08	1719598563	1340998693	1052779416	1249435831	5.52052e+08	0.0056173	2.1556	1.47473	up
V2288	TG 61:3	1.71932e+08	1.95471e+08	1.2303e+08	1.82558e+08	1.7056e+08	5.27194e+07	551011062	4.20588e+08	3.96611e+08	6.39267e+08	4.5988e+08	4.8612e+08	1.1358e-05	3.2953	1.24404	up
V2404	FA 17:0	1321381103	1035906346	1010903557	1032811767	1054991195	1042495507	6.16013e+08	5.80179e+08	5.14621e+08	6.22143e+08	3.98007e+08	3.82319e+08	0.00394775	0.47908	1.56515	down
V2425	FA 20:5	1342801311	9.34272e+08	9.25077e+08	8.69504e+08	7.03213e+08	8.7858e+08	6.39517e+08	7.06914e+08	5.87194e+08	6.62542e+08	769495805	2.34742e+08	0.014797	0.63685	1.10853	down
V2430	FA 20:3	4791577658	2909338137	2347802544	3471581411	4153203287	2020196228	13005087967	6212917544	4221033003	5327724189	11723643252	22247267890	0.028479	3.1857	4.81797	up
V2432	FA 20:2	1443733893	1362799845	7.93924e+08	1252181641	1244823058	4.5487e+08	8176836323	3758364522	2038409272	2391892711	2643648891	9664636082	0.02142	4.3761	3.45721	up
V2451	FA 22:5	2128822421	931008224	1091743125	1643663022	1046821309	1003966426	1950847231	1927208994	1804663167	2081148354	2353254779	4126791237	0.0249747	1.8154	1.85597	up
V2455	FA 22:3	1344019312	1172515124	5.71732e+08	1309870133	9.80634e+08	3.56375e+08	4453604114	4409802941	1983182436	2113667227	3235590885	4562219119	0.00066628	3.6194	3.17611	up
V2463	OAHFA 20:1	33545444	7.31344e+08	8.24891e+08	524776334	1092202212	4.44711e+07	3.25933e+06	31796.7	3.38609e+06	5.12636e+07	1.10449e+06	0	0.0104056	0.018161	1.35399	down
V2464	OAHFA 20:1	3.50569e+07	7.64296e+08	862057723	5.48421e+08	1141412795	2.81003e+08	3.40619e+06	732714	3.53866e+06	11244979	1.15425e+06	0	0.00394775	0.0055274	1.47665	down
V2476	FA 24:5	1157467981	842171333	4.25091e+08	7.52177e+08	4.93999e+08	6.10888e+08	4312446415	3078163579	2305485053	2596225621	2429640493	1773815027	0.00028017	3.8525	2.98348	up
V2479	FA 24:4	8.95833e+08	7.02656e+08	3.78864e+08	5.11501e+08	4.20253e+08	3.75634e+08	9.1855e+08	989488056	9.88133e+08	8.26497e+08	7.9794e+08	947706901	0.0027183	1.6648	1.17383	up
V2497	ST 24:1+O4	5.65951e+08	4.98504e+08	2.53768e+08	3.98242e+08	3.93911e+08	141303644	1217537751	1043322743	6.60696e+08	5.62381e+08	7.16562e+08	7.93377e+08	0.0034389	2.2178	1.3568	up
V2531	LPE 18:0	3740269311	1790761719	1842474086	1741044915	2178755671	9.2699e+08	3564447669	3085118559	2957150185	3323764195	3477333913	2914051789	0.013684	1.5811	2.04223	up
V2581	Cer 34:1	7.24258e+08	8.12713e+08	8.02862e+08	6.44431e+08	4.5588e+08	8.36146e+08	1503869037	1114538819	1573053605	1340437950	1314644433	809861444	0.0013491	1.7904	1.44723	up
V2618	LPC 19:2	8.16628e+08	6.08595e+08	5.9378e+08	497535231	5.35024e+08	5.17915e+08	3.05806e+08	3.73795e+08	3.04341e+08	2.94203e+08	3.10504e+08	2.48688e+08	0.00019263	0.51474	1.1166	down
V2626	Cer 34:1	2137121042	2745622353	2598033192	1981224999	1451933928	2675943367	4144410574	3513435029	4516046885	3595278159	3704060851	2580963716	0.0019054	1.6228	2.25091	up
V2650	Cer 35:0	3.04844e+08	2.03423e+08	3.23668e+08	1.89894e+08	1.3971e+08	1.60447e+08	7.84614e+08	6.51933e+08	5.90158e+08	407442235	532721104	8.00289e+08	0.00015076	2.8496	1.27609	up
V2687	Cer 37:1	7.46812e+08	1093901626	8.12466e+08	1111856755	7.82141e+08	6.097e+08	2478575477	1787678760	1631093464	1893015868	1855056386	3201297144	0.00053442	2.4912	2.2836	up
V2688	LPC 23:6	1094267428	6.52733e+08	631783418	7.81765e+08	7.39127e+08	5.90296e+08	5.15953e+08	4.69886e+08	4.45921e+08	4.6452e+08	4.49391e+08	4.66082e+08	0.0041292	0.62623	1.00858	down
V2723	Cer 38:2	8.13741e+07	1.0285e+08	2.53721e+08	8.42343e+07	7.24792e+07	4.73982e+07	3.85524e+08	3.2598e+08	3.96264e+08	3.20839e+08	5.52677e+08	6.70481e+08	0.00394775	4.1301	1.13014	up
V2752	Cer 40:2	2222712434	376080725	2.14308e+08	3.60221e+08	3.51181e+08	5.39525e+08	3.19441e+08	2.52969e+08	9.93746e+07	2.29594e+08	2.78312e+08	114875958	0.0249747	0.31854	1.00776	down
V2804	Cer 42:3	3811760437	4676701318	3064975492	3932464763	3228410607	6832343366	3491927445	3440607304	2551252762	2402650892	2927337333	1746927825	0.038192	0.64825	1.99836	down
V2876	PE 36:4	6.21956e+08	6.22405e+08	644176229	6.8738e+08	8.71016e+08	1143711714	1.97802e+08	2.90985e+08	3.59156e+08	5.6244e+08	3.52362e+08	7.46613e+08	0.0249747	0.54662	1.17694	down
V2960	PG 36:4	4.35966e+08	9.91248e+08	5.66649e+08	4.16397e+08	3.42263e+08	1205197584	238485943	1.78395e+08	2.94833e+08	1.41633e+08	1.06772e+08	1.19821e+08	0.0087151	0.27287	1.27246	down
V3016	PE 40:7	4437139928	9.38827e+08	3316921420	2448112203	3098193449	2625440072	6.37919e+08	3.45607e+08	7.6678e+08	6.56604e+08	9.85976e+08	2720836284	0.0249747	0.36252	2.5169	down
V3125	LBPA 40:7	3116055490	3216004186	2625133377	1058197759	2059218722	2552915172	4413616518	3191865765	7637248471	5597456712	4518170830	3525480201	0.0090978	1.9746	2.68139	up
V3132	LBPA 40:6	6.09177e+07	4.06666e+08	5.87747e+08	462765471	4.25952e+08	1715267902	5.78876e+07	1.72076e+08	138626081	1.48543e+08	1.12569e+08	1.41806e+08	0.037373	0.21083	1.31128	down
V3133	LBPA 40:6	137044465	1.73575e+08	1.58879e+08	1.73186e+08	1.61233e+08	351900656	187518112	2.74474e+08	3.80712e+08	3.1529e+08	435880820	1371339859	0.0163092	2.5655	1.05014	up
V3193	PS 40:3	3.32805e+08	3.59627e+08	3.03253e+08	2.41856e+08	3.52334e+08	3.20985e+08	2.85706e+07	1.00108e+08	3.25526e+07	1.14242e+08	1.04685e+08	1.03308e+08	0.00394775	0.25301	1.02666	down
V3200	PC 37:3	1167598018	1616174229	1330831096	344938458	1355371440	1172526646	1158634204	3.66372e+08	3.61991e+08	306010205	3.31166e+08	3.03948e+08	0.0163092	0.40474	1.5605	down
V3201	PC 37:3	1.42783e+08	1.25876e+08	1.23973e+08	6.79803e+08	1.61342e+08	1.39181e+08	1.45556e+08	6.63986e+08	716451203	6.16695e+08	6.00016e+08	6.81854e+08	0.037373	2.4943	1.04388	up
V3265	PS 42:5	3.79341e+08	610747767	5.33846e+08	4.48295e+08	5.47633e+08	553826501	2.55477e+08	2.67175e+08	2.8071e+08	2.56803e+08	2.28296e+08	2.0712e+08	2.4834e-05	0.48658	1.05845	down
V3267	LBPA 44:12	5.57375e+08	1446932010	1621551287	1267027689	1812636494	666593872	3387202536	1428201542	8300835472	7737710950	6597428602	8.11335e+08	0.027436	3.8337	3.08644	up
V3274	PG 44:11	3.33588e+07	1.54871e+08	1.47704e+08	1.95454e+08	1.54991e+08	2.39394e+08	7.8661e+07	2.8196e+08	1812706850	1407624196	1299630977	4.80766e+08	0.028482	5.7912	1.40147	up
V3336	PC 41:8	4.21216e+08	4.60653e+08	3.95561e+08	4.59455e+08	4.84214e+08	3.67836e+08	188666315	1.70514e+08	1.86582e+08	2.17059e+08	2.25081e+08	2.02746e+08	3.7776e-07	0.4599	1.01629	down
V3372	PI 40:6	2.55487e+07	5.48681e+07	8.75841e+07	8.93228e+07	8.76705e+07	9.92775e+07	460291072	3.35728e+08	5.42417e+08	4.93299e+08	4.40009e+08	1.93362e+08	8.3144e-05	5.5486	1.17786	up

## Sheet: FT vs FW
Identification number	Lipid name	FW						FT						Paired comparison
		FW1	FW2	FW3	FW4	FW5	FW6	FT1	FT2	FT3	FT4	FT5	FT6	FT/FW p value	FT/FW FC	FT/FW VIP	FT/FW regulation
V34	CAR 16:0	3.71733e+08	492858965	3.26457e+08	2.6166e+08	3.15947e+08	548496002	8.74229e+08	1189134508	1919722011	1576456465	5.34755e+08	751420541	0.0064148	2.9544	1.37208	up
V46	CAR 18:0	3.54006e+08	4.43314e+08	2.86588e+08	3.03831e+08	3.27534e+08	4.31708e+08	6.01619e+08	8.14537e+08	1125998514	773368054	4.45364e+08	8.44944e+08	0.001918	2.1453	1.0501	up
V50	DG O-22:3	2.5324e+08	3.73986e+08	2.77242e+08	3.12052e+08	501502580	1.90815e+08	27736.8	1262.71	0	2.86037e+06	0	0	0.00369988	0.0015137	1.00694	down
V109	LPC 15:2	5.00744e+08	6.32065e+08	539681457	4.75059e+08	5.88327e+08	592160620	145631295	1.10736e+08	1.34888e+08	1.81216e+08	1.84147e+08	91580451	5.3557e-08	0.25486	1.17156	down
V122	LPC O-16:0	3.97582e+08	4.51913e+08	3.854e+08	3.41557e+08	6.02094e+08	4.42008e+08	5.61452e+07	6.96877e+07	2.79523e+07	6.85302e+07	1.70206e+08	6.04717e+07	0.00394775	0.17286	1.08141	down
V143	LPC O-18:3	1039873218	1269760854	1002215409	7.99495e+08	1474992305	1140292666	202472034	1.90104e+08	7.77348e+07	2.20306e+08	3.67569e+08	1.57058e+08	4.4261e-06	0.18066	1.72443	down
V159	LPC 17:0	1849612041	2040765463	1808073749	1784014319	3779428021	1954511417	8.68991e+08	1106957560	1018066357	1025978175	8.93891e+08	6.18824e+08	0.00394775	0.41862	1.91836	down
V173	LPC 18:2	26391228038	30748810276	29274015398	26150682929	33419462398	28871145513	12451494350	15598602768	14133637606	13658152038	14551938311	11517445481	2.4874e-07	0.46845	7.19371	down
V174	LPC 18:2	5.0888e+08	6.46166e+08	1.78289e+08	1.2696e+08	7.51911e+08	5.28232e+08	3.03661e+07	1.69774e+07	2.80677e+07	1.12847e+07	1.60032e+08	1.96377e+07	0.00648531	0.097198	1.05691	down
V175	Cer 34:1	2.21419e+08	3.45734e+08	3.19296e+08	1.71975e+08	3.0032e+08	3.05999e+08	1455335362	1013900385	1066680239	1066091679	7.96456e+08	3.62228e+08	0.0010675	3.4604	1.43633	up
V180	VAE 16:1	3.78588e+08	3.57853e+08	3.01705e+08	3.20674e+08	4.3255e+08	3.21818e+08	3.57784e+06	1.84553e+06	4.42361e+06	2.44116e+07	3.56051e+06	0	0.00394775	0.017897	1.07415	down
V193	LPC 17:0	4583198299	5452603794	4435956368	3617261619	9359403521	5206495163	1983411691	2506055561	1871625310	1970368607	1340531374	9.06732e+08	0.0015815	0.32396	3.31633	down
V210	LPC 20:5	5656608028	3968203974	5373901149	5065399030	6381412867	5346514524	1564601750	2036038756	2145729345	2172364549	2318049319	1684743326	2.3199e-06	0.37498	3.30339	down
V212	LPC 18:2	1082487250	1299348502	7.85479e+08	5.77472e+08	1729748183	1330627527	2.32907e+08	3.52293e+08	1.98866e+08	2.95264e+08	2.72815e+08	2.27894e+08	0.000455	0.23218	1.61672	down
V213	LPC 20:5	4040756281	2759403115	4279958053	3078325602	4174270391	1859208630	3.44438e+08	489613245	4.2518e+08	4.58777e+08	441725203	177716745	2.078e-05	0.11576	3.06088	down
V224	Cer 36:1	2.62413e+08	387910128	2.63354e+08	158059055	2.82259e+08	3.57171e+08	8.83526e+08	5.56049e+08	4.84053e+08	5.72207e+08	5.85967e+08	7.88011e+08	0.00050634	2.2615	1.03351	up
V226	LPC 20:1	8.18163e+08	6.02068e+08	7.3969e+08	6.52301e+08	1221526619	8.42036e+08	1800150013	2604051259	2520593954	1875044857	3511588215	1636536952	0.00052019	2.8607	2.06706	up
V236	DG O-31:3	3.11076e+08	7.55896e+08	5.659e+08	4.29882e+08	9.36498e+08	2.67032e+08	6.01248e+06	5.72814e+06	8.80403e+06	7.0062e+07	1.39041e+07	5502.69	0.00394775	0.031999	1.25668	down
V237	DG O-33:6	1178472596	1736965438	1545838971	1536981726	2282925358	8.38724e+08	1.97125e+07	1.36917e+07	2.40429e+07	1.97002e+08	1.96395e+07	841930	0.00394775	0.030146	2.17095	down
V250	LPC 20:5	1218364385	7.22339e+08	1151870347	8.87512e+08	1133993142	534792788	6.66005e+07	121666324	1.10504e+08	1.09241e+08	1.1367e+08	4.6649e+07	1.9842e-05	0.10061	1.62829	down
V252	LPC 20:4	7.41823e+08	6.69227e+08	8.97358e+08	2418038986	5.96694e+08	680367005	2380224141	3117027748	3318498128	3221872453	2961388022	2559105887	0.00648531	2.9246	2.41521	up
V262	LPC 22:6	23165681121	25973247977	24755487767	19127564078	34146040431	27779400029	14183965486	13308038766	11813670048	12897866378	16261406954	15311822672	0.00026141	0.54068	6.01145	down
V267	LPC 22:5	2.30034e+08	1.66644e+08	1.86879e+08	1.76853e+08	2.76324e+08	1.27267e+08	7.40708e+08	7.41266e+08	7.33181e+08	8.11011e+08	1110152067	2460654133	0.00394775	5.6675	1.59602	up
V271	LPC 20:1	6.8548e+08	1454910240	1174611185	7.20898e+08	1164194610	1189192109	4747119738	6409281210	6318684150	3777667640	7688311094	4232213076	3.3118e-05	5.192	3.68757	up
V316	DG 32:1	6.2043e+08	2.57629e+08	4.25409e+08	316698355	3.30797e+08	2.87919e+08	1396717597	7.84315e+08	8.96083e+08	2246493371	9.24412e+08	7.01106e+08	0.0094531	3.1038	1.39613	up
V325	TG O-32:0	7.54406e+08	5.13163e+08	5.54633e+08	4.92571e+08	6.25769e+08	5.3946e+08	2536430387	1683857214	1199776268	2911778670	1614036231	1521262254	0.000647	3.2952	1.98179	up
V344	DG 33:4	2.74766e+08	5.38836e+08	4.94098e+08	3.01081e+08	8.36366e+08	2.31052e+08	8.79639e+06	6.96476e+06	6.06238e+06	6.72421e+07	3.70174e+06	0	0.00394775	0.034664	1.13132	down
V355	Cer 40:2	1.83258e+08	2.09757e+08	1.7776e+08	1.62624e+08	1.94056e+08	1.99289e+08	6.89236e+08	8.48437e+08	9.14043e+08	6.50512e+08	1342421078	1221141431	6.3294e-05	5.0285	1.56347	up
V376	PG O-25:0	4.77717e+08	7.71756e+08	5.35811e+08	4.79555e+08	8.68968e+08	3.51477e+08	1.15356e+07	5.26687e+06	8.57461e+06	5.55056e+07	0	0	0.00388491	0.023207	1.34135	down
V378	DG 34:1	2639566452	2732189541	2185528970	1847720378	2226451366	1984870592	14595997223	10449832124	7772566172	11061414738	5955717274	6736331064	0.00030914	4.1547	4.80072	up
V388	DG 34:2	4772114064	5060395608	4982606356	9.80781e+08	1797793934	1462073441	8754065108	6069006279	6583874446	9472686552	5675491131	4668642951	0.0163092	2.1633	3.25634	up
V394	DG 34:1	8041739184	6099912766	5853869645	5268142447	6121629816	6373170606	15636675605	13873225941	13668005780	17565011575	14194752408	14797394319	2.4655e-07	2.3766	5.35523	up
V397	DG 36:4	3.58935e+08	2.99169e+08	2.44165e+08	6.70711e+07	7.92589e+07	8.54332e+07	1675295552	1422752464	7.04859e+08	1347221431	5.54879e+08	1029673411	0.00051416	5.9387	1.73938	up
V399	TG O-36:4	3.80857e+08	4.74316e+08	3.67315e+08	2.85124e+08	9.19661e+08	7.69733e+08	1.99514e+08	1.33976e+08	1.44679e+08	2.10983e+08	8.47929e+07	3.12803e+07	0.00397	0.25187	1.0654	down
V408	LPC O-27:8	9.7988e+08	1504856670	1250095133	2.72558e+08	1298467363	2045852145	495835	305621	600774	1.02145e+07	1.27392e+06	478378	0.00394775	0.0018185	1.89294	down
V411	Cer 40:2	191067657	2.09509e+08	1.30864e+08	1.93453e+08	2.15617e+08	213671870	7.8124e+08	9.08685e+08	1016458125	7.25403e+08	1491748912	1371143957	0.00394775	5.4538	1.66544	up
V416	DG 36:2	3.71699e+08	4.38607e+08	2.38353e+08	1.98892e+08	3.06793e+08	2.85909e+08	1354467872	1105529769	7.72605e+08	9.43796e+08	5.44975e+08	8.29643e+08	0.00043081	3.0164	1.42956	up
V459	TG O-36:4	3059262004	3622196080	2882957742	2182902305	6717551084	6330855361	1425958215	9.99332e+08	1129481053	1706658917	6.37235e+08	2.70183e+08	0.0032853	0.24879	2.97283	down
V460	Cer 41:2	327528191	3.37382e+08	4.00923e+08	3.35394e+08	4.21482e+08	3.07171e+08	6.64459e+07	4.145e+07	3.50795e+07	7.55637e+07	6.4421e+07	2.10363e+07	3.751e-08	0.14273	1.01191	down
V465	DG 36:3	2.40134e+08	2.20729e+08	1.79082e+08	1.45814e+08	2.64131e+08	2.83282e+08	9.06978e+08	3.26368e+08	6.60999e+08	4.17204e+08	6.27722e+08	7.22799e+08	0.0013647	2.7469	1.01831	up
V471	DG 36:2	10164002239	11308268553	7530801053	6353400721	9180938454	8609926158	37321986400	30617287837	21702125309	26022332619	17316162138	23678786783	0.00017088	2.9476	7.53283	up
V477	DG 36:1	1418162922	1574712743	8.17397e+08	6.82357e+08	1173597825	1044728629	2828227488	2749015554	1125131865	2471235782	1144389912	2089385177	0.01992	1.8488	1.73595	up
V479	DG 36:3	3.69397e+08	2.77695e+08	252839364	2.28445e+08	337297523	4.27914e+08	1295181964	1217114436	6.51997e+08	1720966192	1068605827	1214119797	0.00011893	3.7854	1.64334	up
V481	DG 38:6	118750059	1.45857e+08	1.68047e+08	1.35361e+08	2.79881e+08	1.99305e+08	2243457033	1655048468	1867832447	2029938672	9.62219e+08	6.79118e+08	0.00026278	9.0122	2.06605	up
V482	LPC O-27:8	774992877	1108129022	8.88574e+08	1.77804e+08	1157365601	2200597531	324457	71447.1	187625	7.09207e+06	743538	794893	0.00394775	0.0014608	1.67823	down
V483	Cer 42:5	3.45895e+08	3.35261e+08	342198790	3.26901e+08	312433591	3.56492e+08	7.61161e+08	9.49801e+08	1066778781	7.68025e+08	1611398868	1463696338	0.00038088	3.279	1.56925	up
V485	DG 36:2	11833778636	11527865746	8586872059	8130612949	10392643144	11278405396	20810889181	19962063321	19145024700	21140632401	18620580443	20119273647	1.5578e-07	1.9401	5.69295	up
V488	DG 38:5	2.02455e+08	1.25997e+08	1.54273e+08	8.59087e+07	1.37569e+08	2.01973e+08	2027306026	1722592722	1421395380	1027325801	1149788998	2087930136	1.5201e-05	10.39	2.11735	up
V497	TG O-38:4	1.88699e+08	1.82618e+08	142914280	1.09794e+08	2.5439e+08	2.54891e+08	6.63638e+08	8.62189e+08	6.74054e+08	1137109807	4.40578e+08	4.47094e+08	0.00090171	3.7277	1.22441	up
V508	Cer 42:2	5.55821e+08	487765378	5.9117e+08	4.36284e+08	6.12109e+08	525315933	1.71662e+08	2.08022e+08	1.64861e+08	1.61967e+08	2.25477e+08	1.55193e+08	2.7399e-07	0.33885	1.08109	down
V533	DG 38:6	2312224019	2959882573	3186772955	2635126350	4806292375	3616921637	36104455310	26624883853	30772434254	36258456803	16328900877	12274150061	0.00023312	8.114	8.38889	up
V535	TG O-38:6	2.35053e+08	2.53516e+08	2.02546e+08	1.66405e+08	3.28161e+08	2.51272e+08	2709976168	1745889096	2491014845	3459941876	1816928261	1765590698	2.2625e-05	9.7354	2.54174	up
V536	DG 38:6	4.49879e+07	5.28121e+07	5.87304e+07	6.79102e+07	5.6882e+07	5.00082e+07	4.82988e+08	3.87377e+08	9.20505e+08	6.84251e+08	2.12658e+08	4.67282e+08	0.00087075	9.5224	1.13191	up
V541	DG 38:5	5.94034e+08	1.19967e+08	1.64575e+08	5.56141e+08	1.8396e+08	1.29444e+08	1726300093	1646638890	2297120173	2431393804	1136516819	3028478397	0.00394775	7.0169	2.32026	up
V548	TG O-38:4	1.68596e+08	1.48695e+08	1.28136e+08	1.07247e+08	1.43213e+08	1.04796e+08	1145320349	8.74164e+08	457756389	7.5922e+08	7.39909e+08	1762774644	0.0012513	7.1678	1.52878	up
V549	DG 38:4	1682731818	1622467954	1287121986	1045827958	1908973156	1854639749	5551967734	7329248141	5630177933	8844777863	3817776155	3939356613	0.00034946	3.7348	3.59697	up
V552	PEt 31:0	1255088799	1755720869	1695838541	1536405468	2403314037	1833623910	10906300861	7812199105	10268731425	12432880095	7141296364	4930358884	9.1893e-05	5.1042	4.64387	up
V553	DG 38:3	5.61896e+08	5.14513e+08	4.9184e+08	3.59216e+08	6.18573e+08	5.93534e+08	1035654423	9.86622e+08	7.83165e+08	9.65249e+08	651956877	9.26652e+08	0.00038769	1.7038	1.07009	up
V554	DG 38:3	7.15518e+08	7.88114e+08	5.24295e+08	475053468	1078951073	1108846345	7119290071	6734663182	4889911447	6977879314	3936736039	9.15581e+08	0.0014501	6.5179	3.60319	up
V555	DG 38:5	6.41679e+08	1059269897	7.80735e+08	8.2626e+08	1332568303	5.31908e+08	9.392e+06	2.25734e+06	2.08913e+06	3.18219e+07	4.52045e+06	7986.84	0.00394775	0.0096838	1.65142	down
V556	DG 38:5	619921274	3.77183e+08	1.62596e+08	117142430	4.21605e+08	3.5934e+08	1303503058	1313094968	1919845316	1974686017	1136785290	2810744009	0.00037642	5.0825	2.04723	up
V559	DG 38:2	4.6474e+08	5.88204e+08	3.36345e+08	303131771	4.71426e+08	4.5874e+08	7851193411	5920910320	3121805831	5265488644	3804764171	4429747172	5.4263e-05	11.589	3.86425	up
V562	DG 38:4	1.7912e+08	9.67479e+07	1.18005e+08	1.1036e+08	102837715	1.19183e+08	860523015	677536871	4.01566e+08	6.53485e+08	9.62016e+08	1843160478	0.00394775	7.4331	1.48711	up
V564	TG O-40:7	1792268780	1606337606	1396812157	1193772767	2218312341	2495946425	4683715030	5915194406	5126182592	7632922570	4036291329	3897783742	0.00020585	2.9236	3.19998	up
V565	TG O-40:7	3.27275e+08	2.44491e+08	2.3192e+08	1.72924e+08	2.81346e+08	3.3543e+08	9.67009e+08	1279176700	8.83994e+08	1674854554	8.35353e+08	9.57996e+08	9.6364e-05	4.1411	1.60345	up
V568	TG O-40:7	3.05821e+08	3.31259e+08	3.34232e+08	1.87824e+08	5.19431e+08	4.93947e+08	7.36074e+08	9.41851e+08	8.10478e+08	8.51517e+08	6.23217e+08	4.49294e+08	0.0017418	2.031	1.02113	up
V576	DG 38:3	7.90489e+08	638516654	6.35764e+08	4.991e+08	7.06505e+08	8.22124e+08	1118688490	1082482251	9.80678e+08	1092721252	8.29697e+08	1218715059	0.0004576	1.545	1.05324	up
V577	DG 38:3	3.92651e+08	2.46724e+08	2.91139e+08	2.35793e+08	2.91452e+08	2.64016e+08	5.21105e+08	5.98721e+08	470313864	5.99779e+08	6.54084e+08	1267926102	0.00394775	2.3882	1.05333	up
V578	TG O-38:3	8.89672e+08	8.44909e+08	6.56324e+08	6.00321e+08	1241509809	1357442971	6506816658	6260619916	5115242556	6991044818	4485265623	1123423950	0.00086597	5.4529	3.50545	up
V582	DG 38:2	7.42781e+08	7.96027e+08	5.01498e+08	503609556	663566872	7.16777e+08	7041489378	5940020207	4463871411	6146181518	4975218522	5735513223	9.2343e-08	8.7411	4.10681	up
V604	DG 40:7	8.67288e+08	1120765213	1102373444	4.5683e+08	1231317916	1071213324	2953623606	3628573355	1930313254	3011896884	12040347459	8427162741	0.023898	5.4689	3.48887	up
V606	DG 40:7	7057005620	7705199408	7737083702	4463000485	11206825806	11063967512	15228631838	20453729950	17116037952	19224158262	12936662626	10195745266	0.0023848	1.9327	4.60481	up
V612	TG O-40:6	118515334	1.15405e+08	1.28601e+08	8.10943e+07	1.65204e+08	1.54807e+08	2076181917	2301642346	1772093255	2354372462	1899576130	2986515049	3.1881e-07	17.535	2.63619	up
V613	DG 40:6	2928382783	2665093364	2693524702	2110760584	3438910301	2760045841	6545179599	7113658706	7299575638	6257816363	3415827482	5073725360	0.00046982	2.1514	3.09289	up
V622	DG 40:5	7.08637e+08	6.17017e+08	655330337	4.1199e+08	792477152	9.82653e+08	3417696515	4474618511	3042550837	4038141792	2271897982	2480029983	3.0001e-05	4.7324	2.8817	up
V626	DG 40:7	2935455139	2653441565	2845963817	1820650706	3564578795	4107213780	5826346613	7036437714	6903106241	7695397407	6506017910	4380293656	0.00014254	2.1391	3.16185	up
V631	DG 40:4	2.24763e+07	2.43679e+07	2.16402e+07	1.80204e+07	2.55863e+07	2.77735e+07	1704050490	1805519197	9.69607e+08	1710774928	1221714887	1611369685	7.0007e-07	64.513	2.21023	up
V637	DG 40:6	2991784502	2291522235	2548808125	2078766915	3051102669	2966221634	5837371498	6392928214	6668498756	5875848695	3926429762	5279799003	3.9535e-05	2.1334	3.05323	up
V638	DG 42:9	6.78936e+07	6.81665e+07	7.43946e+07	5.8479e+07	8.9188e+07	9.22394e+07	8.04529e+08	2.27434e+08	8.10219e+08	1373232310	3.46531e+08	185728325	0.015057	8.3215	1.12455	up
V641	TG O-42:8	7.81566e+08	5.82367e+08	6.26408e+08	4.52883e+08	8.36626e+08	8.00958e+08	2336491170	3372869725	2695647524	3449782524	2293589776	2412922476	2.947e-06	4.0583	2.58617	up
V653	DG 40:4	3.08775e+07	2.85656e+07	2.30138e+07	2.29846e+07	2.29992e+07	3.24787e+07	1534234655	1673964251	1022560552	1561450226	1316268637	1683815359	7.5015e-08	54.638	2.18841	up
V705	DG 42:7	3.57417e+08	3.93439e+08	3.25443e+08	2.63429e+08	5.03011e+08	4.64714e+08	2611284916	2149007850	1779265438	2989581461	1631305454	755013562	0.00058425	5.1639	2.19143	up
V710	DG 42:7	5.55493e+07	7.75342e+07	7.12902e+07	4.82727e+07	9.86231e+07	9.8266e+07	9.55196e+08	1154119872	9.39607e+08	1099721357	843356287	7.04274e+08	1.4924e-07	12.671	1.69549	up
V717	TG O-42:6	5.22844e+07	5.87414e+07	4.88746e+07	3.4816e+07	7.14456e+07	6.6702e+07	1313486143	9.94714e+08	6.77234e+08	1058997892	6.71206e+08	512511041	5.7999e-05	15.707	1.61827	up
V733	DG 42:7	3.21862e+08	3.36918e+08	3.17293e+08	2.63333e+08	4.0499e+08	4.41218e+08	1788331695	1465849075	1330455590	2061986873	1426306020	617937232	0.00027491	4.1671	1.81213	up
V746	TG O-42:6	4.78885e+07	5.16477e+07	3.85585e+07	1.79123e+07	6.22196e+07	6.74283e+07	7.10782e+08	6.30065e+08	4.88249e+08	7.36893e+08	5.2641e+08	376998474	3.1695e-06	12.145	1.31263	up
V749	PC O-32:0	1063599244	1754472828	1413553719	1694248246	1269684980	1207201832	1003436776	9.78018e+08	8.14485e+08	8.68727e+08	683083450	4.3305e+08	0.0016967	0.56896	1.32472	down
V754	PE O-36:6	4126699976	3925076413	4187477292	5107129534	4342004212	4383563999	1967210071	2323830234	2971481328	2774844646	3552004762	3399494627	0.00050236	0.65161	2.24412	down
V760	SM 36:4	5.20349e+08	1237593516	8.55562e+08	8.52997e+08	7.03518e+08	6.83003e+08	1246606956	1522168037	2183217028	1738245403	9.7606e+08	634300230	0.042248	1.7104	1.10866	up
V767	Co 8:0	2224878677	2992667899	3444387534	2854545013	3237600773	2736760178	9.01733e+07	6.76151e+07	9.16158e+07	1.35014e+08	4.48904e+07	258313028	2.0011e-08	0.039313	3.06964	down
V775	PC 32:2	5302150007	4337532762	7838989803	8910537589	5249215407	3643345132	1881389284	2548623435	2384201092	3220639368	2576787273	3229815747	0.0038246	0.449	3.00932	down
V797	BMP 36:6	1024448631	1398935092	1390047274	1852887351	6.42198e+08	4.49199e+08	2.24494e+08	1.53832e+08	1.91289e+08	2.45496e+08	2.36315e+08	3.99875e+07	0.0014121	0.16151	1.58697	down
V823	PE 36:3	7.15489e+08	1116010673	9.70525e+08	1218500599	8.49223e+08	952461827	5.00181e+08	3.18706e+08	4.44537e+08	5.6267e+08	4.67584e+08	2.32418e+08	0.00010553	0.43387	1.29188	down
V834	PC 33:2	1865831879	1881124166	2074858396	3131038908	2991518218	2748861964	8.05215e+08	6.97193e+08	8.51299e+08	949705309	6.46429e+08	6.10735e+08	3.6386e-05	0.31039	2.3315	down
V838	Co 8:0	3813527651	5588075070	6068415221	5295699381	5968314929	4921602521	1.89738e+08	1.67815e+08	1.99519e+08	2.75126e+08	1.00998e+08	4.98551e+08	4.5016e-08	0.045229	4.11337	down
V862	PC 34:5	5.34964e+08	3.14126e+08	8.94118e+08	1017647042	4.56152e+08	2.98032e+08	8.47871e+07	1.4425e+08	1.90661e+08	2.32035e+08	1.36233e+08	1.3622e+08	0.0062472	0.26292	1.07931	down
V898	BMP 38:8	7.11493e+08	859720093	1313187953	1128723771	7.16889e+08	6.89013e+08	3.10427e+08	1.51947e+08	3.1581e+08	4.91539e+08	5.37513e+08	2.06757e+08	0.00096516	0.37165	1.282	down
V929	PE 36:2	8.79425e+08	6.67337e+08	1084109958	1058746562	8.35022e+08	4.31316e+08	2.77562e+08	2.54016e+08	2.80583e+08	3.46955e+08	1.80086e+08	1.15401e+08	0.00026396	0.29351	1.31576	down
V973	PC 35:2	3663522975	4500284026	4766105270	5718066885	5833846936	4962248790	1786758246	1653226698	1981783080	1954106939	1297687891	1146517115	3.6339e-06	0.33352	3.29455	down
V975	PC O-36:2	7.11329e+08	9.23498e+08	9.72632e+08	930145827	1352185281	1311837916	1.03514e+08	1.04746e+08	1.02584e+08	1.21037e+08	6.3583e+07	7.18636e+07	3.3548e-06	0.091481	1.76262	down
V981	PC 35:1	1336281721	1929885471	1692816591	2390688448	1779490550	1350749629	1034705074	9.53365e+08	1192979830	1319386528	1136974267	7.93578e+08	0.0035368	0.61365	1.3465	down
V993	PC 36:6	1504018195	1293019373	2963961270	2990747051	2243010363	1319946529	4.08705e+08	4.65274e+08	8.81244e+08	1361628205	1016932945	1494275991	0.01354	0.45702	1.8084	down
V999	PC 36:5	28391105984	29535588080	41924455756	41994361341	28311024627	18265253493	18450207820	19634297278	23560463583	14503161074	13300628130	13324241992	0.0058609	0.54544	6.05797	down
V1001	PC 36:5	3168523303	1816972389	2095487487	2519544958	1235535538	1475535691	1052757321	1013319549	1166467257	1385338219	1083923322	1974023638	0.0249747	0.62346	1.21476	down
V1015	PC 36:4	3790127870	4753189073	3012253166	2141121574	2928291393	3476858971	6126346340	7358308769	5302868114	5240422686	4919011214	5749264414	0.0007581	1.726	2.80647	up
V1024	PC 36:3	1344059894	1589748059	1256812405	2147131867	1534871760	8.91273e+08	7564242517	5830302428	5542998482	5428405179	4913333278	3927322425	1.3751e-05	3.789	3.59742	up
V1027	phSM 39:3	7.6613e+08	8.21816e+08	1098170999	8.92384e+08	8.83444e+08	8.89606e+08	8.46426e+07	7.36133e+07	1.01859e+08	151578405	6.0638e+07	2.91413e+08	0.00394775	0.14271	1.59154	down
V1049	PC 36:1	31510241433	35114926860	35651970382	32636940446	30150034838	23088965412	54667946682	57221923315	52020753859	45992699630	41949537641	42258315268	0.00028815	1.5631	7.37629	up
V1083	PC 37:6	7.64841e+08	9.81346e+08	1144556311	1600252910	1397433946	1181031933	3.99661e+08	2.921e+08	4.31934e+08	5.29758e+08	3.90962e+08	3.58026e+08	9.8102e-05	0.33983	1.57558	down
V1089	TG 46:2	5.07812e+08	4.86205e+08	6.70086e+08	7.0577e+08	3.36086e+08	2.04565e+08	1096278847	8.59871e+08	1020432197	2508941682	1229032843	6.86086e+08	0.00648531	2.5427	1.28454	up
V1102	TG 46:1	4.59085e+08	3.79413e+08	607866092	6.93552e+08	2.32695e+08	1.28671e+08	1312187574	1011293786	9.04315e+08	2854092271	1468191435	1115166352	0.00394775	3.4643	1.60441	up
V1105	Co 9:0	5626517863	6747951074	6172494521	6317743480	6427674501	4988532487	8.49936e+08	8.61224e+08	9.37436e+08	1092561589	7.24238e+08	1117482298	3.2511e-09	0.15388	4.12966	down
V1110	PC 37:4	3393636108	4362373087	3997667731	4155129161	5070146949	4384556975	2728249819	2561804096	2742164735	2809793668	1504571062	1477396037	0.00394775	0.54503	2.49629	down
V1113	PC O-38:4	9.4873e+08	1337286627	9.68103e+08	1040898436	1305072677	1185135400	7.02422e+08	8.80525e+08	5.20482e+08	6.93702e+08	4.63716e+08	4.42192e+08	0.00038546	0.54575	1.28333	down
V1137	PC 38:8	3.31966e+08	3.11013e+08	5.10566e+08	6.38354e+08	9.0655e+08	5.9798e+08	2.77188e+07	2.48849e+07	3.59771e+07	3.83502e+07	2.95659e+07	1.34121e+07	0.00017776	0.051543	1.28813	down
V1144	PC 38:7	3.5722e+08	4.13938e+08	3.16214e+08	2.79467e+08	3.10058e+08	3.46171e+08	8.59936e+08	727355036	7.83151e+08	7.22331e+08	8.06108e+08	441408854	0.00011269	2.1454	1.08739	up
V1146	PC 38:7	4266691812	2728150484	7313904097	7410612311	6537035133	2738816209	1.79612e+08	2.67239e+08	5.36109e+08	5.01127e+08	3.15304e+08	1.61562e+08	0.00031161	0.063266	3.87264	down
V1150	PC 38:7	10122471617	9001588124	18706484597	13340088400	13209985328	9126012532	2452463433	2395127532	4425172304	6859534940	6976283135	4473831831	0.0012425	0.37524	4.81752	down
V1154	PC 36:3	1.48164e+08	8.97419e+07	9.656e+07	1.33445e+08	1.33309e+08	1.26103e+08	5.32794e+08	4.68522e+08	3.78995e+08	3.74633e+08	4.36332e+08	3.99701e+08	3.8356e-07	3.5624	1.00683	up
V1155	PC 38:6	19052465091	21319179518	23194113307	23324079974	22975226691	19675891545	11360823630	13992894251	14751134754	14094316006	14346961675	14453443779	0.00394775	0.64072	5.04982	down
V1156	PC 38:6	4396975759	4012306996	4629185546	5491653159	3156496199	3430198769	8.15937e+08	1352202019	1974710941	1460974857	2210527108	2598334106	0.00022109	0.41457	2.73943	down
V1169	PC 38:5	11862420740	16384228494	15848490410	13481421417	13579925750	13493357297	26456344383	26080823499	28041562199	25565692148	24886581840	21394472832	1.7712e-06	1.8007	5.99702	up
V1170	PC 38:5	10192148071	8090482397	12594203507	12186945100	8287132792	5469544971	4164188635	1632627517	1732060066	1405996891	1824441453	1285016454	0.00394775	0.21197	4.74431	down
V1171	PC 38:5	1759760332	1557776408	2547074284	2810683970	2289640647	1175665315	6.9609e+08	5.20509e+08	4.37935e+08	5.02698e+08	4.44782e+08	3.71509e+08	0.0001572	0.24492	2.16832	down
V1172	PC 38:5	3661007036	2644499190	3422942341	3580087532	2799451444	1992124280	11019685270	8977576350	9907016545	8225063732	7891327401	14967239704	6.9387e-05	3.3695	4.69437	up
V1193	PE 41:4	1051003082	6.06989e+08	9.10651e+08	7.53632e+08	4.88856e+08	5.31233e+08	2153099378	1978522405	1128439227	1895775000	2162111560	1301089655	0.00043438	2.4455	1.76384	up
V1195	MePC 37:4	8.87217e+08	3160321696	3525305970	3199963595	3207743448	3471779986	2408453627	1899394385	2303653147	9.04847e+08	7.84514e+08	7.26918e+08	0.0249747	0.51728	1.91775	down
V1196	SM 42:3	1812094504	1998205388	2554454741	2624956640	2298251312	2117347307	1152683305	1058384995	1021773630	1072609254	7.6128e+08	4.65011e+08	1.4454e-05	0.41265	2.06338	down
V1208	PC 38:3	2675119119	2445417170	3087599944	2809034911	1924543110	1796861706	5679853563	6279077351	4763487530	4790235045	4671886316	10366187927	0.00394775	2.4799	3.19094	up
V1223	PC 38:2	7.22033e+08	630418602	1097420238	9.62905e+08	9.10607e+08	8.04025e+08	4.30582e+08	5.09504e+08	4.32541e+08	347310990	3.86038e+08	5.87706e+08	0.00039713	0.52535	1.11409	down
V1240	PC 38:1	6.22158e+08	7.06678e+08	7.02489e+08	8.60784e+08	5.70669e+08	5.03336e+08	1890979549	1904523225	1316718986	1157141487	1170672837	1250745929	0.00394775	2.1913	1.55319	up
V1250	PEt O-44:7	5828271885	6071825662	5976908309	5779616426	5479692567	5606650118	2009425617	2020800282	2151698699	2214158634	1930524209	2571061845	8.1994e-11	0.37123	3.47366	down
V1271	PC 39:6	8.23051e+08	1190238020	1097718077	1204347708	1451752943	1126262326	5.85229e+08	3.29224e+08	4.03009e+08	389715354	2.57814e+08	2.60187e+08	1.1094e-05	0.3228	1.60605	down
V1276	TG 48:2	4079661468	3376376911	4787258727	5106009842	2656808384	1695649452	7857342561	5862734710	7741278582	12976506285	8453951864	7252843177	0.001777	2.3106	3.61075	up
V1290	TG 48:1	2448634714	2353276759	2991032882	3573400862	1617267453	1090139662	6987523730	4367281130	4313619437	9024992525	5704519178	5067079999	0.0015521	2.5199	3.13325	up
V1305	TG 48:2	3.5236e+08	3.17354e+08	3.52196e+08	402945044	1.89015e+08	128392057	8.83282e+08	5.82588e+08	8.16478e+08	1052189723	9.14507e+08	1163198724	6.1307e-05	3.1064	1.39473	up
V1307	PC 38:7	9.82543e+08	4.74466e+08	1005597068	1045114952	1071305159	5.91266e+08	3.37698e+07	4.30319e+07	5.3445e+07	5.8138e+07	4.9619e+07	3.55425e+07	0.00394775	0.052907	1.61986	down
V1308	PC 38:7	1873103636	1417331704	2461037143	1890680426	1804038489	1634746203	4.52318e+08	3.5535e+08	5.62901e+08	1001911589	1281645378	927775180	0.00036255	0.41349	1.84417	down
V1317	PC 40:9	1911610658	1204144652	1944957768	1473110000	2162427034	1179891036	1.4959e+08	2.13146e+08	2.58372e+08	2.56209e+08	2.58788e+08	2.62727e+08	0.00394775	0.14164	2.13301	down
V1318	PC 40:9	3.1781e+08	3.1375e+08	5.77822e+08	5.14815e+08	8.1895e+08	4.54233e+08	4.63706e+07	4.40601e+07	6.07608e+07	6.17998e+07	6.17008e+07	1.79452e+08	0.00394775	0.15151	1.15498	down
V1327	PC 38:5	2.40127e+08	138510271	2.062e+08	1.70301e+08	167912220	1.34485e+08	6.08364e+08	5.35417e+08	5.35852e+08	5.30831e+08	5.23286e+08	8.42832e+08	0.00394775	3.382	1.15933	up
V1329	PC 40:8	16228415162	19104690036	18261671119	17073468882	22944444016	19773949619	7283748290	5913842294	7504355340	8499162067	9327531496	11056374189	5.2113e-06	0.43731	5.89125	down
V1330	PE 43:8	4.57332e+08	4.79459e+08	4.25365e+08	3.69109e+08	501185758	4.96534e+08	1113911371	1159182393	1039956689	9.6852e+08	1100434563	7.6528e+08	3.4134e-06	2.2526	1.34939	up
V1343	PC 40:7	1674508027	1209462145	8.31561e+08	1017840977	9.37843e+08	1086829227	5.0068e+08	3.37789e+08	6.62537e+08	5.49253e+08	6.22206e+08	8.76972e+08	0.0036882	0.52522	1.13066	down
V1347	SM 44:6	4.79609e+08	466991553	6.6841e+08	7.73626e+08	6.31117e+08	5.54297e+08	1.67984e+08	1.67196e+08	1.9124e+08	1.96379e+08	1.77893e+08	1.03706e+08	6.6477e-06	0.28103	1.18583	down
V1354	PC 38:3	5.82284e+08	4.48018e+08	9.7083e+08	6.24369e+08	4.47081e+08	3.91296e+08	1314105131	1373739549	9.77182e+08	8.44544e+08	9.20388e+08	1302562935	0.0017352	1.9436	1.21941	up
V1367	SM 44:5	2165240985	2275405083	2569759400	2882398865	1936968953	2335174823	8.77226e+08	1451185904	1890925485	1424605285	1645202979	1677939596	0.0012574	0.63305	1.61921	down
V1381	PC 40:5	5.29484e+08	4.47064e+08	6.68886e+08	792639370	6.64537e+08	5.99862e+08	1260756996	1306668168	1487406758	1123740030	1461026293	1343520489	2.1207e-06	2.1562	1.50963	up
V1382	PC 40:5	2.15232e+08	1.29443e+08	1.57845e+08	1.80917e+08	1.39825e+08	1.21349e+08	3.60623e+08	3.52058e+08	3.3479e+08	3.83555e+08	4.37597e+08	1549505570	0.00394775	3.6186	1.00084	up
V1383	PC 40:5	2284386610	1873199728	3256207805	2644024283	2443252532	1221034211	6.05657e+08	594297180	3.91715e+08	4.86543e+08	2.90437e+08	2.46933e+08	7.8889e-05	0.19061	2.38711	down
V1384	PC 40:5	3.6955e+08	5.40711e+08	6.46311e+08	6.4082e+08	4.9328e+08	3.93915e+08	1833071655	1640481742	2484482891	1633671473	2138199860	1065298093	8.8681e-05	3.4997	1.93306	up
V1430	MGDG 40:9	1125826734	9.2843e+08	1039182558	1178830971	5.1939e+08	1142108250	1727092898	1822437666	2208937335	2582829587	2126398964	1909113256	6.0997e-05	2.0858	1.84181	up
V1439	TG 50:5	1521176441	6.90714e+08	3138670552	3154425349	2945437722	1991284786	1.22643e+08	1.43468e+08	1.8448e+08	5.78812e+08	1.5156e+08	3.86818e+07	0.00394775	0.090736	2.50815	down
V1453	TG 51:11	1639139009	2829697595	2442226140	1947966579	1759162555	1016921630	2.46929e+07	5.41172e+07	5.53781e+07	4.48438e+07	1.69995e+07	4.6411e+07	2.5509e-05	0.020837	2.41755	down
V1455	TG 50:4	2.71818e+08	1.20315e+08	5.71759e+08	5.66873e+08	5.25585e+08	367224030	2.40424e+07	2.1439e+07	5.88929e+07	8.4048e+07	2.92807e+07	7.21675e+06	0.00069359	0.092805	1.06586	down
V1456	TG 50:4	5.15005e+08	4.13407e+08	2.57757e+08	5.17849e+08	3.40869e+08	2.5287e+08	7.534e+08	763958878	8.53096e+08	830460592	6.59989e+08	1158081312	0.00033742	2.1843	1.17621	up
V1457	TG 50:4	9762112290	7321853002	11677033419	11128507080	7886219379	6574333421	5008174151	5349044477	7108360840	8998439288	6256194040	3207448573	0.02628	0.66104	2.6158	down
V1480	PC 41:6	3.76044e+08	528484892	6.42715e+08	6.30081e+08	6.47263e+08	472589635	1.96313e+08	1.01528e+08	1.4207e+08	1.477e+08	1.18163e+08	7.5767e+07	5.6996e-06	0.23703	1.17675	down
V1485	PG O-41:4	3.58615e+08	467769588	4.30938e+08	2.95895e+08	3.08991e+08	1.9454e+08	3.7741e+06	1.01643e+07	6.14396e+06	9.65413e+06	3.50397e+06	9.82721e+06	8.4849e-06	0.02094	1.02195	down
V1486	PG O-43:7	1506951389	2070238552	1973418844	1641815943	1455255338	962969836	2.13323e+07	4.78771e+07	4.58601e+07	4.65056e+07	1.704e+07	4.23344e+07	0.00394775	0.02299	2.2295	down
V1497	TG 50:1	1.5448e+08	7.55727e+08	1.48588e+08	1.80359e+08	1.36722e+08	1.0534e+08	1093113353	1304943966	1086253201	1866993489	1429180710	1167488694	0.00394775	5.3658	1.83925	up
V1500	PC 40:8	2590186140	2502419336	2330400594	2375865367	2611564548	2822694062	1327983700	1234982243	1538780513	1654016610	1763211401	1054979783	7.5468e-06	0.56285	1.87889	down
V1502	PC 42:11	1045332558	7.48944e+08	1063810013	8.75727e+08	1308835155	7.76894e+08	1.12762e+08	1.82703e+08	1.9268e+08	1.58915e+08	1.69441e+08	2.50808e+08	4.3184e-06	0.1834	1.60804	down
V1509	MePC 41:11	1389907853	1328423335	1235335138	1257198374	1440817292	1481085867	7.06884e+08	6.72099e+08	8.18622e+08	8.7477e+08	9.2719e+08	5.65935e+08	5.9227e-06	0.56137	1.37962	down
V1511	phSM 44:4	4740450571	4695538264	4633309254	4789047362	4381447760	4691594758	1665803714	1734859209	1855628675	2101281836	1781288770	2316684990	4.7254e-10	0.41013	3.01066	down
V1551	PC 40:5	2.15325e+08	153282739	211158396	223476872	165937117	1.26853e+08	5.40269e+08	4.35769e+08	5.82079e+08	5.00709e+08	6.5762e+08	1142583699	0.00394775	3.5209	1.18365	up
V1558	TG 51:4	1152926670	9.83466e+08	1205569705	1585527304	1201730035	1072791373	3.66106e+08	2.84457e+08	441283239	5.41529e+08	3.42401e+08	1.79729e+08	6.7235e-06	0.29929	1.64645	down
V1574	TG 51:3	2302882170	2132684407	2374835294	3343774967	2145238490	2052786934	1073396195	7.7411e+08	1165064254	1570590479	8.87121e+08	6.60206e+08	0.00394775	0.42715	2.02217	down
V1627	TG 52:7	2098892867	7.23477e+08	1687850784	2169711206	1977838682	2148784804	1.21429e+08	2.01311e+08	198417570	2.81719e+08	1.5121e+08	4.5566e+07	0.00394775	0.092504	2.2725	down
V1628	TG 52:7	2.55482e+08	3.85626e+08	7.89444e+08	9.19077e+08	1274671409	3.59243e+08	1.79606e+07	1.51871e+07	1.86168e+07	3.41072e+07	1.6724e+07	4.24211e+06	0.0026094	0.02682	1.37598	down
V1643	TG 52:6	4138530699	1312309559	5128025012	5178883590	9277397955	7723115751	2.8576e+08	668800558	3.37561e+08	1039333996	3.28609e+08	7.71339e+07	0.0014104	0.083557	3.84963	down
V1655	TG 52:5	6.14208e+08	8.78125e+08	5.33036e+08	6.70352e+08	2.96896e+08	3.45846e+08	7.53522e+07	6.94128e+07	181680592	1.14779e+08	7.90591e+07	2.62285e+07	0.0004379	0.1637	1.13033	down
V1657	TG 52:5	16550813038	24919672341	26846766727	27664987063	24843315781	22585799902	9058677511	6644718545	9730540690	8992756794	7019001734	3652358235	5.4923e-06	0.31447	7.33059	down
V1660	PG O-44:3	7.93883e+08	3.24158e+08	7.85945e+08	8.72239e+08	4.41189e+08	6.37481e+08	6.95541e+07	9.59428e+07	9.41268e+07	1.04562e+08	7.98054e+07	39693047	9.2685e-05	0.12547	1.30287	down
V1668	TG 52:6	8.2112e+08	4.14059e+08	7.73728e+08	1250690139	1064630621	991310079	2.04822e+08	2.34575e+08	3.10318e+08	3.86781e+08	3.27719e+08	1.09024e+08	0.00053041	0.29597	1.38255	down
V1677	TG 52:5	1657005513	1802696453	1649083307	1791174932	1464578002	1587203274	1054274970	7.86313e+08	1204692197	9.69477e+08	9.30588e+08	7.27419e+08	1.0827e-05	0.57003	1.49686	down
V1680	d5-TG 52:5	9.50597e+08	1.47336e+08	929717594	7.8993e+08	9.00538e+08	8.29916e+08	4.99687e+07	5.92162e+07	7.29692e+07	2.73273e+07	5.76522e+07	2.64548e+07	0.00394775	0.064553	1.47586	down
V1694	PC 44:12	2038972265	3158669829	1422545196	1065502942	3476815103	3212638273	8.96838e+08	1062979276	1271509186	1122411669	1172822858	1997887495	0.028749	0.52343	1.57891	down
V1697	TG 52:1	2765995368	3601665854	2655232351	2573352722	1988212284	1568698410	5765590503	5843905035	3429645997	8961882512	5135308567	5317688677	0.0022393	2.2737	3.02118	up
V1704	TG 52:3	6.7372e+08	5.97049e+08	7.02457e+08	5.88688e+08	5.80556e+08	608067627	1.66076e+08	1.69779e+08	3.13757e+08	1.87845e+08	9.97418e+07	2.19559e+08	2.6094e-07	0.30842	1.1864	down
V1711	PC O-44:4	7.13853e+08	1209239006	4.8242e+08	5.5942e+08	382904532	327527215	1.31939e+08	1.68136e+08	138677001	1.22823e+08	1.22979e+08	7.55808e+07	0.004286	0.20682	1.10519	down
V1719	TG 52:2	3508580981	2632937024	3824136547	3962626018	2997782964	2452137171	2069186157	1926810071	2214659299	1676783410	2006423581	1764118757	0.00075302	0.6016	1.92588	down
V1738	TG 53:5	9.01403e+08	8.63171e+08	9.66191e+08	1091436551	1345435990	1197030119	3.54133e+08	2.02529e+08	3.87399e+08	3.33596e+08	2.78024e+08	1.02174e+08	4.4275e-06	0.26048	1.61404	down
V1743	SM 48:8	1060595958	1357595219	1448260133	1186713707	911339674	7.12999e+08	7.46631e+06	3.0685e+07	3.3458e+07	2.15556e+07	1.31289e+07	3.12997e+07	2.1728e-06	0.020606	1.85808	down
V1750	TG 53:4	1693885678	2098297035	1794405845	2568820456	2424060375	2523807824	9.13852e+08	6.88167e+08	1034053925	1134514909	7.24689e+08	3.96291e+08	2.8799e-05	0.37331	2.09188	down
V1763	TG 53:3	2520180053	3074317335	2720616450	3443404297	2757144631	2768869265	1926739536	1652325150	2090707154	2729364005	1770047778	1306586578	0.002226	0.66393	1.62217	down
V1776	TG 54:9	6.16103e+08	1.96824e+08	9.95518e+08	9.40277e+08	1280858959	6.84735e+08	1.09848e+08	2.30358e+08	2.27708e+08	3.08265e+08	1.96678e+08	5.64408e+07	0.0034631	0.23955	1.31909	down
V1792	TG 54:8	6322043189	3036490115	10659056421	7805952714	2433782456	6587845382	1862678042	3698085536	2953146948	4308338841	3469659570	9.20252e+08	0.035909	0.46715	2.63843	down
V1794	TG 54:8	3359000680	8.61493e+08	3060360979	2494502693	9608585669	1983680511	2.63685e+08	3.69119e+08	4.07186e+08	5.16642e+08	3.3646e+08	5.87821e+07	0.00394775	0.091347	2.78826	down
V1805	TG 54:7	4536128975	4512067873	8256476721	9154049599	9878371912	8111754955	5.70475e+08	8.26211e+08	8.45217e+08	1129924677	9.19188e+08	2.1472e+08	3.9362e-05	0.10137	4.6655	down
V1806	TG 54:7	19130211652	13401549738	22117933420	18145569333	19279314907	17187372062	1694243463	2414378408	2378142749	2605403217	2073654861	6.17516e+08	1.0303e-07	0.10784	7.3534	down
V1807	TG 54:7	2833070468	2250751796	4076833297	3171462070	2434883177	1614799005	8254597502	13080765707	10731944684	13240499680	12417910694	6708986684	4.2543e-05	3.9333	4.94526	up
V1811	TG 54:6	6656330240	3156626865	8496496993	9877897388	12840467927	11630215590	5861077715	683235332	7.85794e+08	8.37944e+08	4318170892	6.24926e+08	0.0104056	0.24899	4.32379	down
V1812	TG 54:6	16593792257	17906561042	18550477001	12491941980	15756682484	16544849508	8740377422	14650047895	11919004617	10319333591	12043289598	5324559515	0.0041425	0.64385	3.9529	down
V1813	TG 54:6	6993695508	11262499336	9098532384	10577799085	13970536611	12165284179	6215244285	4753059264	5851219426	5678409401	4751190773	2705468627	0.00047509	0.46754	4.20887	down
V1814	TG 54:8	4.46392e+08	2.32633e+08	856141780	4.168e+08	3.46912e+08	6.85386e+08	7.44546e+08	1119606335	1045587349	1181320263	1253471674	5.86462e+08	0.0064329	1.9874	1.10036	up
V1815	TG 54:8	1662343819	8.87677e+08	1354636880	1647238320	1525161988	1353710069	1.45087e+08	1.61786e+08	1.92196e+08	1.96104e+08	1.64142e+08	41293075	1.0105e-06	0.10682	2.02428	down
V1817	TG 56:11	3.94255e+08	5.85626e+07	315512081	4.28291e+08	664011097	6.86049e+08	1.27088e+07	9.67137e+06	1.08355e+07	1.4664e+07	1.18862e+07	405238	0.0014496	0.023627	1.09912	down
V1818	d5-TG 54:8	4237395037	6763072444	5109144777	6166253531	8454070094	7560435688	3545050892	1965685528	2717892044	2387484764	1881249697	9.99655e+08	0.00019939	0.35249	3.62827	down
V1823	TG 54:5	16118693979	25323750549	18864845583	18671185598	24340785221	23825695110	17737552222	12866068275	13591567326	15035536980	9266029396	7765434488	0.0027903	0.59981	5.2007	down
V1827	TG 54:7	3283047366	2634853269	3043191141	2532022617	2486056494	2490966296	7.98775e+08	5.13083e+08	9.47858e+08	5.03688e+08	5.78276e+08	2.23257e+08	1.9756e-07	0.21645	2.64537	down
V1828	TG 54:7	775937222	7.5955e+08	7.77818e+08	1394576637	1068583309	1166173169	2.50266e+08	2.50753e+08	2.75861e+08	3.48316e+08	3.24932e+08	1.4983e+08	6.6834e-05	0.26923	1.50901	down
V1829	TG 54:7	4.24551e+08	3.01551e+08	4.39705e+08	3.67632e+08	2.01775e+08	2.06282e+08	9.10151e+08	2076232082	1256303023	2068218799	2326743150	1935201339	9.2212e-05	5.4457	2.14382	up
V1853	TG 54:3	17502577279	27752215452	18713719373	20542130848	18148388651	18752365765	46544183607	41951494301	39898295307	36192299035	33574186904	31400137786	0.00394775	1.8908	7.64678	up
V1854	TG 54:3	1.0256e+08	1.59159e+08	1.01729e+08	1.15062e+08	8.62579e+07	7.64102e+07	1672677876	246758961	2.71481e+08	2284482026	3.46e+08	3.40464e+08	0.00394775	8.0506	1.27379	up
V1855	TG 54:3	16997294108	27215665216	18275540492	20060945301	17731873110	18011497842	45454478904	40986463763	39074451160	35386991022	32075272354	31729133295	0.00394775	1.8996	7.59261	up
V1858	TG 54:5	1531901310	1865628145	1382820752	1585510868	1747336596	1762477144	1303480910	8.01806e+08	6.74549e+08	5.83425e+08	8.05928e+08	5.52421e+08	7.4822e-05	0.47811	1.66264	down
V1864	TG 54:2	4038375589	6553575072	3790605714	4050293389	3028556796	3068495012	17667809611	16732451876	11455373725	22912232343	14208805824	14281898975	0.00394775	3.9649	6.22637	up
V1874	TG 55:8	5.31889e+08	351804893	7.37016e+08	7.03272e+08	9.10291e+08	9.33409e+08	135955849	2.08025e+08	1.84866e+08	2.56078e+08	1.6389e+08	5.80888e+07	0.00025079	0.2416	1.28082	down
V1879	TG 54:3	2228308779	2684149938	2276440396	6.16755e+08	4.60852e+08	6.48012e+08	3555503136	3381637147	3639791951	2738563714	3259088692	3164660541	0.0019484	2.2143	2.29116	up
V1881	TG 54:3	8.93505e+07	1.103e+08	8.08283e+07	8.53401e+07	7.41864e+07	6.39967e+07	1397057327	1081649232	1411879064	1845778443	1509973758	1620843346	1.0486e-07	17.594	2.14562	up
V1887	TG 55:7	6.49774e+08	7.06855e+08	8.31483e+08	9.05306e+08	6.91156e+08	5.65602e+08	2.12434e+08	240601687	2.31095e+08	3.15954e+08	2.31092e+08	2.22067e+08	0.00394775	0.33407	1.24531	down
V1891	TG 54:2	1501066454	1860260773	1382282339	1415805031	1247292825	1298671169	2862516065	2999399167	2568129256	3348461545	2814164178	2915849059	8.862e-07	2.0112	2.21086	up
V1921	d5-TG 55:6	8.98151e+08	4.67453e+08	7.10381e+08	5.00175e+08	7.83696e+08	6.54964e+08	5.01928e+07	1.76198e+08	2.54642e+08	4.67027e+07	7.61208e+07	5.5965e+07	0.00394775	0.16435	1.32149	down
V1926	TG 56:10	4.88414e+08	1.3682e+08	4.79676e+08	4.44956e+08	1522827027	9.19018e+08	2.06158e+07	2.66747e+07	2.72e+07	3.21986e+07	1.97395e+07	2.41656e+06	0.0090619	0.032278	1.31201	down
V1927	TG 56:10	1124858367	6.87986e+08	2947412992	1824366510	2805903429	2090854690	1.38917e+08	2.70249e+08	1.86172e+08	2.97526e+08	2.17699e+08	3.79185e+07	0.00087575	0.10003	2.29171	down
V1928	TG 55:3	3.36672e+08	4.83983e+08	3.3838e+08	4.41299e+08	3.93463e+08	3.38263e+08	8.32402e+08	6.60693e+08	8.66214e+08	1534483703	6.85999e+08	4.37643e+08	0.016156	2.1515	1.0184	up
V1934	d5-TG 55:5	3.28681e+08	7.53954e+08	2.92212e+08	3.62844e+08	7.04755e+08	2.80787e+08	1254739614	1145045756	1416875376	1892833300	1296930081	1242791860	0.00394775	3.0292	1.66406	up
V1937	TG 56:9	13634553177	9380554089	20179134371	16090542659	14484081469	13422620375	4718254694	8833233389	7862347875	8699608703	7578400719	1745406420	0.0015189	0.45231	4.76592	down
V1958	TG 56:7	10787624881	13909483544	17728657657	12388621918	10694216878	10281302203	21401433299	32909796350	22870515326	22534188924	21049424764	20080155234	0.00394775	1.8584	5.60154	up
V1960	TG 56:9	9.49287e+08	5.99042e+08	4.70083e+08	8.2719e+08	1480589088	1557868309	1.77926e+08	1.34623e+08	1.53845e+08	1.45593e+08	1.09872e+08	2.72523e+07	0.0009455	0.12731	1.57535	down
V1980	TG 56:5	6795729075	7209579871	8462928474	7770698917	6538159918	6711251782	12292193303	16317992448	11866181885	14669606388	11246227175	10297604767	0.00020244	1.7635	4.10038	up
V1983	TG 56:7	1265499206	1259498958	1713535886	6.86282e+08	5.19943e+08	5.33068e+08	1905723394	2784266753	2177264076	2060156759	2601214468	2725858658	0.00026548	2.3846	2.05304	up
V1985	TG 56:7	1239725866	1232557478	1679767300	1249546727	1012807237	1005790705	3.18431e+08	4.2052e+08	3.39118e+08	4.05273e+08	4.18602e+08	4.41669e+08	8.5849e-06	0.31584	1.62361	down
V1987	TG 56:4	2340683157	3602613169	2837251585	3186782537	3099775022	3103027113	8221613340	8655389613	6725323974	8775293971	6615210279	6533754227	2.0988e-06	2.5056	3.86152	up
V2002	TG 56:3	7.80855e+08	1444087529	8.82507e+08	1047292853	7.46722e+08	8.04295e+08	14218799796	10367722375	8810522156	14915865419	9708467425	9385301749	2.5485e-06	11.814	5.77602	up
V2019	TG 56:2	6.224e+07	1.15176e+08	8.22487e+07	8.92522e+07	5.43425e+07	5.88472e+07	7.08413e+08	585270614	327945954	1389967869	4.26178e+08	392885367	0.0058367	8.2896	1.21346	up
V2021	TG 56:4	5.19057e+08	6.22332e+08	6.57832e+08	6.49517e+08	7.21163e+08	7.37667e+08	1186033030	1196790828	9.83523e+08	1052668154	1133379930	1182875302	1.7709e-06	1.7236	1.22062	up
V2033	TG 56:3	3.1205e+08	4.56756e+08	3.5055e+08	4.3659e+08	334338142	3.6872e+08	2564249646	2199683770	2202699978	2283210248	2241783838	2204232979	0.00394775	6.0628	2.52628	up
V2034	TG 57:7	2.29476e+08	1.73356e+08	3.04212e+08	2.21122e+08	1.56568e+08	1.4912e+08	5.17954e+08	1219171849	7.3553e+08	1229636470	1348948983	1103442896	0.00012131	4.9882	1.61057	up
V2039	TG 56:2	4.20102e+07	6.76285e+07	5.09466e+07	54186719	3.76779e+07	3.64643e+07	447131217	393105150	253415430	7.25686e+08	2.91995e+08	2.93621e+08	0.0005958	8.3241	1.01745	up
V2053	TG 57:5	8.49219e+08	7.14645e+08	6.62553e+08	6.78805e+08	8.34874e+08	7.7448e+08	2.60047e+08	1.8713e+08	2.88043e+08	2.91324e+08	2.35235e+08	1.39312e+08	1.6381e-07	0.31035	1.30827	down
V2057	TG 58:11	1369506802	8.1908e+08	1816762351	1771958348	2419607512	1732765367	2.76818e+08	6.8602e+08	3.02706e+08	3.8182e+08	4.80518e+08	3.20021e+07	0.00025385	0.21752	2.01048	down
V2058	TG 58:11	1228439786	9.67313e+08	3479218247	2192591112	6036900612	6879489975	1.72714e+08	1.64794e+08	2.6286e+08	388140020	1.25235e+08	1.55154e+07	0.0093087	0.054333	2.94845	down
V2060	TG 57:4	1193770944	1316633019	1288195625	1269225799	1240835316	1308454187	8.928e+08	7.13496e+08	9.59804e+08	9.78547e+08	8.39294e+08	665671589	1.6981e-05	0.66293	1.16853	down
V2065	TG 58:10	8550952417	9186156713	12475291172	10116324734	18144990592	19650810559	4707376292	5829748819	4952290313	5364185256	3575354320	8.38349e+08	0.0017454	0.32342	5.0777	down
V2066	TG 58:10	6.36184e+08	1.67996e+08	1239770947	9.00955e+08	1826762010	1311073224	3.82832e+07	103912307	9.55562e+07	1.24254e+08	7.68194e+07	1.39781e+07	0.0026633	0.074441	1.65808	down
V2067	TG 58:10	7.90516e+08	1236380003	1236366336	1007036779	1100677984	1122833390	2518603037	4487721399	3936394241	3814974892	3658228409	2681403752	1.8024e-05	3.2488	2.74314	up
V2068	TG 58:10	2.37063e+08	1109475806	2.45424e+08	2.19099e+08	3.43922e+08	2.21033e+08	2260934071	4027093841	7.72579e+08	5.90121e+08	3287934275	6.09786e+08	0.0163092	4.8604	1.86211	up
V2072	PG O-50:8	2.79726e+08	7.42121e+07	3.96639e+08	5.40518e+08	6.03185e+08	4.32447e+08	2.33386e+07	2.92653e+07	3.11272e+07	3.63577e+07	2.46939e+07	1.95106e+06	0.00089689	0.063064	1.05592	down
V2073	d5-TG 58:12	2.81344e+08	1.32707e+08	5.32624e+08	4.23532e+08	8.40395e+08	544962815	2.07685e+07	3.07827e+07	2.95332e+07	3.54481e+07	2.65623e+07	5.03528e+06	0.0014228	0.053757	1.14343	down
V2075	TG 59:8	2.88473e+08	3.24273e+08	3.44034e+08	317515946	5.31387e+08	2.98475e+08	1.07218e+07	1.8813e+07	1.64402e+07	2.09104e+07	7.60334e+06	6.7869e+06	0.00394775	0.038626	1.0564	down
V2077	TG 58:9	1429254179	1570419237	2452782533	1772846775	3577992357	3044724742	9.03488e+08	1263334770	1010652223	5.34945e+08	1051003542	1.76044e+08	0.0034582	0.35669	2.064	down
V2082	TG 58:11	2.54586e+08	1.85768e+08	2.53888e+08	2.02753e+08	3.2243e+08	2.56628e+08	4.68427e+08	747631603	8.03842e+08	6.15671e+08	8.52858e+08	3.66759e+08	0.00066472	2.6118	1.04415	up
V2083	TG 58:11	5.60724e+08	2.19793e+08	8.35367e+08	7.16369e+08	1744177240	1889743511	1.07709e+08	1.55281e+08	1.64539e+08	1.83964e+08	1.55897e+08	1.40197e+07	0.010532	0.13097	1.50564	down
V2086	d5-TG 58:11	8.45936e+08	9.17056e+08	1374627625	1135366096	2411357933	1907081626	2.2998e+08	7.35364e+08	2.62322e+08	6.60641e+08	4.93864e+08	248529143	0.0039544	0.3062	1.66732	down
V2088	TG 58:8	6514008009	9424998169	9562831671	7419708525	8412751415	9320333524	15369383280	21033658757	16095342489	14847957174	15038669062	8577867578	0.0027136	1.7957	4.31967	up
V2094	TG 58:10	1.19362e+08	1.66181e+08	1.39621e+08	134198738	1.2621e+08	1.47321e+08	4.22138e+08	7.15586e+08	7.16415e+08	6.09746e+08	6.56805e+08	9.87367e+08	2.7738e-05	4.9323	1.32784	up
V2096	TG 58:10	1907403881	2006276932	2168923369	1957211632	2703402577	3170356123	1271826685	927586850	9.28422e+08	1080149027	7.27756e+08	2.90625e+08	0.00017004	0.37563	2.1378	down
V2102	TG 58:7	1201466754	1615891467	1725091830	1255178333	1592351854	1529720655	2561700733	4734573396	2490067352	2686477346	2885178916	2364017643	0.00394775	1.9868	2.00241	up
V2112	TG 58:6	1570522780	2192600093	2162214880	1849228576	2053002236	2012471316	2968595210	5426287068	3501955305	3771132734	3228393113	2298232678	0.005434	1.7901	2.03284	up
V2119	TG 58:5	4.14445e+08	6.21231e+08	5.41692e+08	5.0578e+08	4.03693e+08	4.42464e+08	1958110404	2475841535	1518096673	2790913343	1980122932	1938361788	5.8503e-06	4.3223	2.28853	up
V2128	TG 58:4	1.01757e+08	1.76305e+08	1.32837e+08	1.40762e+08	1.09175e+08	1.18877e+08	8.9939e+08	8.5697e+08	5.42747e+08	1375639320	6.9718e+08	5.25999e+08	0.00033513	6.2817	1.43263	up
V2139	TG 58:3	3.28492e+07	5.77945e+07	4.01016e+07	3.99379e+07	2.70917e+07	2.99678e+07	6.13631e+08	4.4314e+08	2.92346e+08	9.85757e+08	3.61661e+08	2.44033e+08	0.0024469	12.912	1.12042	up
V2141	TG 58:5	1.62107e+08	1.8566e+08	1.94179e+08	1.77068e+08	1.4891e+08	1.694e+08	4.40099e+08	5.77147e+08	400173656	4.82762e+08	5.09855e+08	5.25456e+08	3.1523e-07	2.8299	1.02387	up
V2158	TG 60:13	1359851840	7.95097e+08	3036073752	2399194729	4297919000	3034056703	1.57929e+08	2.15633e+08	1.82478e+08	2.21246e+08	1.29286e+08	1.56092e+07	0.0011352	0.061799	2.66204	down
V2159	TG 60:13	218964655	1.27621e+08	4.94695e+08	2.69084e+08	4.65796e+08	4.65588e+08	715079335	2225353813	1784317440	1948758936	1761919020	3.9801e+08	0.0041771	4.3264	1.6791	up
V2165	PG O-50:5	4.32628e+08	2.55335e+08	8.61481e+08	553016192	1453699318	9.79795e+08	2.18814e+08	5.61411e+08	4.60303e+08	1.13195e+08	1.25241e+08	9.06091e+07	0.029865	0.34603	1.09879	down
V2166	TG 60:12	1503280140	2420973002	2939365435	1845914381	2963620599	2866595561	7882115045	14100545281	13475848604	12183436242	12822482293	4190865720	0.00041671	4.4468	4.84434	up
V2172	TG 60:11	8.13921e+07	1.60298e+08	1.45132e+08	9.44427e+07	1.08871e+08	1.00991e+08	4.91837e+08	7.86203e+08	8.07796e+08	6.64836e+08	7.11727e+08	1325728750	0.00015189	6.928	1.46275	up
V2173	TG 60:11	2270987762	1319468455	1711497992	1299472903	4789537826	4570227439	684538677	6.43649e+08	7.69499e+08	9.02203e+08	4.51796e+08	1.16185e+08	0.011137	0.22353	2.30701	down
V2176	TG 60:13	6.20165e+08	2.26718e+08	3.45989e+08	5.50716e+08	1006539510	1059379846	1.39292e+08	2.38614e+08	1.46204e+08	1.29901e+08	1.14008e+08	1.77968e+07	0.0051686	0.20628	1.16076	down
V2177	TG 60:13	9.64537e+07	7.73637e+07	2.94632e+08	9.59341e+07	1.30467e+08	1.55763e+08	4.26841e+08	9.43705e+08	1037920605	9.60918e+08	1089726374	3.47848e+08	0.00070818	5.6512	1.35407	up
V2181	TG 60:10	806363624	1049388684	1086856050	8.6547e+08	1390360334	1305375691	2082216857	3826708041	3735731973	3353483146	3064222692	2131540121	0.00014058	2.7974	2.37985	up
V2182	TG 59:3	7.56764e+08	9.0572e+08	676344472	7.50208e+08	7.41994e+08	7.81662e+08	1425821028	1303114857	1378554814	1302412758	1176503788	1216380414	7.9283e-07	1.6916	1.32641	up
V2183	TG 60:12	3.49153e+08	5.86584e+08	5.6189e+08	3.82209e+08	4.86665e+08	5.16203e+08	1916528176	2626182915	2582673873	2382712907	3185782262	1815719031	3.2869e-06	5.0333	2.48057	up
V2188	TG 60:9	4.72551e+08	6.61605e+08	6.98422e+08	5.99489e+08	8.6383e+08	905509684	1218058967	1744311802	1475106855	1403377244	1330063228	8.7601e+08	0.00079148	1.9153	1.32604	up
V2192	TG 60:9	5.38416e+08	7.55125e+08	2.27486e+08	6.83048e+08	9.84234e+08	1031722201	1384974281	1987623890	1717769996	1689851996	1564747384	9.9811e+08	0.0009173	2.214	1.53705	up
V2193	TG 59:2	2.41431e+08	2.80106e+08	1.82215e+08	2.00261e+08	1.72872e+08	184355139	5.86985e+08	6.37592e+08	4.76654e+08	8.88897e+08	5.95371e+08	674065517	2.3738e-05	3.0601	1.17615	up
V2202	TG 60:8	2.47779e+08	4.9776e+08	4.73131e+08	4.18748e+08	610660548	4.32942e+08	6.14063e+07	4.91117e+07	4.61353e+07	5.16051e+07	3.8583e+07	3.04857e+07	9.3029e-06	0.10344	1.14813	down
V2203	TG 60:8	3.19148e+08	387269808	4.78943e+08	4.28248e+08	3.9464e+08	4.2481e+08	1222983449	1681386012	1037459148	1100347101	1259672031	5.75004e+08	0.00054136	2.8264	1.4685	up
V2208	TG 60:10	1.24888e+08	1.54115e+08	1.43688e+08	1.23456e+08	1.67028e+08	1.92802e+08	3.93868e+08	6.27402e+08	6.15166e+08	5.18002e+08	5.64813e+08	5.08867e+08	9.5159e-07	3.5631	1.11638	up
V2225	TG 60:6	9.73539e+07	1.67562e+08	1.26302e+08	1.28912e+08	1.10027e+08	1.05211e+08	4.2823e+08	5.91142e+08	4.05114e+08	7.15253e+08	4.50093e+08	3.6868e+08	5.284e-05	4.0232	1.07311	up
V2242	TG 60:6	8.62769e+07	150541826	1.21506e+08	1.07242e+08	7.56558e+07	8.52996e+07	4.29421e+08	643251441	6.03384e+08	5.36229e+08	6.20735e+08	7.37477e+08	5.8513e-07	5.6989	1.27704	up
V2269	TG 62:13	1087985283	1410903222	1925919429	1360567743	1993399358	2172504750	3155975151	7967428110	5843749430	5266760867	5302739483	1206985940	0.0089509	2.8884	2.7333	up
V2273	TG 62:12	4.64748e+07	2.58545e+08	3.76576e+08	2.49903e+08	1.04628e+08	7.78308e+07	2.8527e+08	3.16399e+08	1084226588	1182789427	9.53074e+08	3.2455e+08	0.019281	3.7221	1.08328	up
V2274	TG 62:12	7.61244e+07	1.14001e+08	1.34081e+08	8.28655e+07	1.49556e+08	1.27981e+08	5.35356e+08	1149140113	9.39132e+08	7.37932e+08	8.68986e+08	5.93464e+08	2.5513e-05	7.0464	1.45518	up
V2275	TG 62:12	2.43536e+08	3.46652e+08	5.04906e+08	3.37684e+08	5.34457e+08	4.45298e+08	1021330161	1816197432	1429312661	1578015076	1272391810	1.69487e+08	0.0070301	3.0204	1.41697	up
V2279	TG 62:11	4.56258e+07	137596972	7.11192e+07	2.62711e+07	5.01711e+07	3.75643e+07	3.53403e+08	7.05043e+08	5.83179e+08	5.3577e+08	4.63564e+08	3.26777e+08	3.2052e-05	8.0569	1.16032	up
V2281	TG 62:13	2.7372e+08	3.52677e+08	3.89401e+08	2.86318e+08	3.67431e+08	4.49257e+08	9.07177e+08	1719598563	1340998693	1052779416	1249435831	5.52052e+08	0.00078119	3.2198	1.47891	up
V2288	TG 61:3	4.47303e+07	5.96217e+07	4.41426e+07	5.59109e+07	4.13999e+07	5.1751e+07	551011062	4.20588e+08	3.96611e+08	6.39267e+08	4.5988e+08	4.8612e+08	2.8809e-07	9.9258	1.20431	up
V2401	FA 17:1	1340925367	1126371578	1115087802	1021701550	1659297310	1263376849	9.13949e+08	9.29036e+08	7.46068e+08	9.50903e+08	6.75209e+08	6.22225e+08	0.0022473	0.64269	1.15374	down
V2404	FA 17:0	1436430781	1556650123	1152577469	1109847071	2144902170	1765086791	6.16013e+08	5.80179e+08	5.14621e+08	6.22143e+08	3.98007e+08	3.82319e+08	0.00011489	0.33967	1.78594	down
V2407	FA 18:4	1193395940	8.27176e+08	1070348105	8.41294e+08	1424424465	1008671694	1.96486e+08	1.36818e+08	1.18823e+08	2.17799e+08	1.08313e+08	7.24391e+07	2.1459e-06	0.13364	1.73629	down
V2411	FA 18:2	9088294883	6899200773	5085073395	3366056568	12286400602	7513087867	4038713640	4001732366	3086828240	4068929773	2466015988	3690029492	0.014965	0.48267	3.10732	down
V2412	FA 18:1	88397429279	112000000000	85189449588	64578376806	95024505149	97539276928	183000000000	157000000000	121000000000	127000000000	123000000000	132000000000	0.0018243	1.5533	12.7003	up
V2413	FA 18:1	5346929729	5340665455	3096889319	2057833182	5139381619	4533285670	9364791881	7875520931	5853150743	6270256858	5589147197	7852013966	0.0056267	1.6776	2.95498	up
V2425	FA 20:5	2759522540	1477427861	2927566802	1381924634	2176194578	1648765665	6.39517e+08	7.06914e+08	5.87194e+08	6.62542e+08	769495805	2.34742e+08	0.00042206	0.29103	2.0552	down
V2430	FA 20:3	2198407508	2022414440	1700687660	1350710308	2007494126	1845742838	13005087967	6212917544	4221033003	5327724189	11723643252	22247267890	0.011221	5.6391	4.6841	up
V2431	FA 20:2	3529165900	3857982537	2672427269	2095452971	5425165219	4944740498	6958899074	13735326649	8119621602	8862413025	8614399441	1912848341	0.025816	2.14	3.19421	up
V2432	FA 20:2	6.11537e+08	5.96747e+08	3.62353e+08	2.77565e+08	7.82678e+08	670418788	8176836323	3758364522	2038409272	2391892711	2643648891	9664636082	0.010509	8.6856	3.20982	up
V2440	FA 21:5	6.07732e+08	422400467	539428464	3.75252e+08	7.6691e+08	5.72296e+08	1.69948e+08	2.02367e+08	1.1915e+08	2.05112e+08	1.51504e+08	1.6511e+08	7.2606e-05	0.30852	1.08644	down
V2451	FA 22:5	1017308003	6.72067e+08	616700589	3.81381e+08	1588924893	7.17098e+08	1950847231	1927208994	1804663167	2081148354	2353254779	4126791237	0.00394775	2.8525	2.06604	up
V2453	FA 22:4	3344218434	3975671188	2977564303	1880374634	3975961980	4758116694	8895570015	10654185036	8797397035	8130819699	6381695305	6327035646	0.0001359	2.3521	3.86659	up
V2455	FA 22:3	2.09242e+08	2.45586e+08	1.30187e+08	9.48925e+07	1.91776e+08	1.99159e+08	4453604114	4409802941	1983182436	2113667227	3235590885	4562219119	5.2674e-05	19.385	3.19531	up
V2473	FA 24:6	1441240512	2050966391	1487562283	1104599551	2925852287	2290804693	7742484029	4862722485	4275218562	5538974147	4610796715	1748501224	0.0059629	2.5466	2.87382	up
V2476	FA 24:5	1.24005e+08	136836102	7.50219e+07	56742178	1.82023e+08	1.65299e+08	4312446415	3078163579	2305485053	2596225621	2429640493	1773815027	2.4771e-05	22.294	2.90311	up
V2477	FA 24:5	8.42439e+08	1340828629	8.16577e+08	668715639	1921085451	1419588308	4.67262e+08	363620863	4.67957e+08	5.48501e+08	4.11847e+08	2.09285e+08	0.0036467	0.35217	1.47046	down
V2479	FA 24:4	2.18367e+08	3.15638e+08	1.36517e+08	1.14357e+08	2.92551e+08	3.66657e+08	9.1855e+08	989488056	9.88133e+08	8.26497e+08	7.9794e+08	947706901	1.8355e-07	3.7867	1.4823	up
V2483	FA 24:1	4.44445e+08	574368800	4.25189e+08	3.23855e+08	5.57614e+08	5.25387e+08	7.53591e+08	9.75598e+08	1139855926	7.2428e+08	1353728819	9.35153e+08	0.00070069	2.0633	1.20152	up
V2497	ST 24:1+O4	146661451	1.86864e+08	9.82829e+07	8.22635e+07	1.88266e+08	1.8692e+08	1217537751	1043322743	6.60696e+08	5.62381e+08	7.16562e+08	7.93377e+08	6.0223e-05	5.6158	1.47281	up
V2523	LPI O-10:0	7.59918e+08	639850921	7.3128e+08	8.99175e+08	5.89405e+08	6.49942e+08	1396097575	1203294753	9.88181e+08	1138567825	8.68399e+08	9.24556e+08	0.0023341	1.5269	1.04346	up
V2526	LPE 18:2	9.05439e+08	9.2244e+08	888286340	8.15334e+08	1065531978	1117803611	2.2809e+08	1.85629e+08	2.19662e+08	2.77912e+08	2.89551e+08	1.75189e+08	5.6562e-08	0.24078	1.55221	down
V2543	LPE 20:5	4.54498e+08	369752034	5.53033e+08	4.44755e+08	3.98583e+08	2.68046e+08	4.03584e+07	3.51734e+07	4.03917e+07	6.57627e+07	5.31647e+07	2.30999e+07	2.6808e-06	0.10365	1.09101	down
V2569	LPE 22:6	5109653085	5720253001	4989978515	4326846219	5890735033	6477222088	3502050728	2861793447	2999640424	3679766999	4571000355	3477914397	0.00073624	0.6487	2.32573	down
V2581	Cer 34:1	3.44404e+08	4.31606e+08	4.08321e+08	3.09664e+08	4.35752e+08	4.23452e+08	1503869037	1114538819	1573053605	1340437950	1314644433	809861444	1.7855e-05	3.2536	1.64233	up
V2626	Cer 34:1	1053306700	1329307340	1211506497	1054323771	1182546149	1153890105	4144410574	3513435029	4516046885	3595278159	3704060851	2580963716	3.236e-06	3.1574	2.80836	up
V2650	Cer 35:0	1.07424e+08	1.44142e+08	1.25918e+08	103199091	1.10047e+08	1.12077e+08	7.84614e+08	6.51933e+08	5.90158e+08	407442235	532721104	8.00289e+08	9.0322e-06	5.3602	1.27091	up
V2687	Cer 37:1	9.6237e+08	1058817710	7.6341e+08	535517921	893211171	1043389598	2478575477	1787678760	1631093464	1893015868	1855056386	3201297144	0.00058378	2.4439	1.9206	up
V2723	Cer 38:2	2.53036e+07	2.63777e+07	2.84642e+07	2.5205e+07	2.15352e+07	2.45015e+07	3.85524e+08	3.2598e+08	3.96264e+08	3.20839e+08	5.52677e+08	6.70481e+08	2.6167e-05	17.516	1.16356	up
V2737	Cer 40:2	2.03887e+08	1.73348e+08	1.69691e+08	1.78647e+08	1.84636e+08	2.00694e+08	611039068	681446616	6.74958e+08	5.3708e+08	1040565059	1091938243	0.00010874	4.1741	1.3765	up
V2752	Cer 40:2	5.42873e+08	4.68696e+08	6.0578e+08	456889429	6.83479e+08	4.74316e+08	3.19441e+08	2.52969e+08	9.93746e+07	2.29594e+08	2.78312e+08	114875958	0.00010045	0.40054	1.00658	down
V2755	Cer 41:2	4.56555e+08	445402336	4.03698e+08	4.5122e+08	4.62117e+08	4.70162e+08	1416819940	1608773677	1732886969	1163383931	2468090323	2368517301	8.8569e-05	4.0007	2.07793	up
V2782	Cer 42:2	479289200	3.97348e+08	4.64432e+08	4.22177e+08	5.68362e+08	4.65899e+08	9.32401e+07	9.38192e+07	8.2e+07	9.38886e+07	1.0849e+08	8.56329e+07	2.766e-08	0.19913	1.11979	down
V2784	Cer 41:2	6.65038e+08	6.91008e+08	9.34686e+08	7.1774e+08	9.9644e+08	6.68079e+08	8.07794e+07	6.84581e+07	2.20074e+07	8.95178e+07	9.11802e+07	2.68683e+07	0.00394775	0.081064	1.5482	down
V2799	Cer 42:5	2.65918e+07	3.85231e+07	2.6045e+07	2.72095e+07	3.50916e+07	4.17972e+07	3.693e+08	1.92691e+08	6.83309e+08	3.50568e+08	3.90817e+08	7.33601e+08	0.00062157	13.932	1.11426	up
V2822	PE 34:2	7.75638e+08	8.47036e+08	9.75892e+08	1071555970	8.03229e+08	7.18667e+08	2.79531e+08	1.93312e+08	2.69437e+08	3.17972e+08	2.84282e+08	1.67906e+08	1.1661e-06	0.2913	1.41298	down
V2849	PE O-36:4	5.40702e+08	5.16857e+08	7.59926e+08	4.01353e+08	1208725596	1303240066	3.08293e+08	4.37331e+08	3.21919e+08	4.27357e+08	2.05386e+08	5.75363e+07	0.013854	0.37157	1.13403	down
V2879	PE 36:3	7.08558e+08	7.58744e+08	8.41358e+08	9.71484e+08	712077902	793454257	2.62395e+08	1.90869e+08	3.18022e+08	343482242	3.56078e+08	2.05556e+08	1.0739e-06	0.3503	1.30268	down
V2893	PG 34:2	2.28029e+08	5.77453e+08	3.7001e+08	4.2482e+08	2.31232e+08	1.88595e+08	5.43952e+08	6.3582e+08	7.26438e+08	6.10064e+08	9.81892e+08	5256611143	0.00648531	4.3338	1.5751	up
V2930	PE 38:9	4.79808e+08	4.35215e+08	8.16878e+08	6.61097e+08	4.69791e+08	4.39356e+08	1.15067e+08	5.21203e+07	1.17439e+08	2.00347e+08	2.13734e+08	2.65497e+07	0.00394775	0.21963	1.15166	down
V2936	PE 38:7	7.03155e+08	7.58582e+08	1042635371	1208777258	3.81895e+08	2.04459e+08	9.15115e+07	7.81278e+07	1.48284e+08	1.54843e+08	5.52828e+07	3.51087e+07	0.0026266	0.13098	1.27312	down
V2938	PE 38:6	6125307254	7628741173	7635146730	7070911570	6657669157	6887410938	4598876545	3552148640	4462285469	5225901237	4933066644	4490216879	2.3267e-05	0.64903	2.77257	down
V2960	PG 36:4	4.25236e+08	6.17006e+08	5.78618e+08	2.81212e+08	7.14553e+08	4.78396e+08	238485943	1.78395e+08	2.94833e+08	1.41633e+08	1.06772e+08	1.19821e+08	0.00069771	0.34893	1.02142	down
V2975	LBPA 36:2	7.05212e+07	5.38226e+08	2.76893e+08	4.03061e+08	2.35086e+08	6.59877e+07	519777599	8.47041e+08	7.93582e+08	6.47225e+08	8.56498e+08	9.77426e+08	0.00051432	2.9196	1.22591	up
V2977	PC 32:2	1.95204e+08	2.78943e+08	1.73564e+08	2.31412e+08	1.34409e+08	1.52863e+08	250797057	4.03046e+08	3.4449e+08	2.95464e+08	383590635	2685679562	0.00648531	3.7406	1.05871	up
V3016	PE 40:7	2475601548	3801703065	3376455530	3094457765	2514134166	2896456707	6.37919e+08	3.45607e+08	7.6678e+08	6.56604e+08	9.85976e+08	2720836284	0.0104056	0.33668	2.38315	down
V3125	LBPA 40:7	5.43054e+08	2510264416	1347987208	1320264955	1117849290	5.75573e+08	4413616518	3191865765	7637248471	5597456712	4518170830	3525480201	0.00058151	3.8953	3.14114	up
V3126	PG 40:7	2.63638e+08	7.49504e+07	1.25721e+08	1.41323e+08	100702174	199039117	2.0303e+08	2.77891e+08	7.70536e+08	8.26764e+08	2474236491	2101761215	0.034116	7.3497	1.75463	up
V3132	LBPA 40:6	6.36326e+08	2.27997e+08	6.13839e+08	8.10468e+08	7.65569e+08	5.37022e+08	5.78876e+07	1.72076e+08	138626081	1.48543e+08	1.12569e+08	1.41806e+08	0.00028238	0.21483	1.20863	down
V3133	LBPA 40:6	6.61669e+07	6.8966e+07	6.0923e+07	7.48735e+07	6.14592e+07	4.17164e+07	187518112	2.74474e+08	3.80712e+08	3.1529e+08	435880820	1371339859	0.00394775	7.9262	1.07303	up
V3185	PC 37:5	1070749980	872480478	1302518082	1309205882	7.21781e+08	603430702	5.47187e+08	6.18157e+08	6.82203e+08	4.34967e+08	3.73159e+08	2.89437e+08	0.0048555	0.50086	1.10999	down
V3190	PC 37:4	7.09399e+08	8.45603e+08	8.03279e+08	755422170	7.27644e+08	7.11007e+08	1332071817	1223307412	1234470322	1132675191	1013889991	1061755600	1.8017e-05	1.5373	1.1463	up
V3198	PG 42:10	1.05016e+08	113193633	1.08684e+08	1.12564e+08	1.36193e+08	9.35144e+07	293927256	254996035	8.39327e+08	7.85011e+08	7.25684e+08	2.61483e+08	0.00394775	4.7229	1.02918	up
V3201	PC 37:3	1.25872e+08	9.14719e+07	1.28941e+08	1.1444e+08	1.42867e+08	1.13166e+08	1.45556e+08	6.63986e+08	716451203	6.16695e+08	6.00016e+08	6.81854e+08	0.00394775	4.7778	1.17621	up
V3213	PG 42:8	317349751	2.55598e+08	2.50238e+08	2.86408e+08	4.04807e+08	2.89309e+08	1.29367e+08	4.91949e+08	9.12526e+08	8.55935e+08	1018131296	7.07166e+08	0.017743	2.2814	1.05541	up
V3267	LBPA 44:12	1.74871e+08	8.1772e+08	9.56245e+08	1120782319	8.75238e+08	655710506	3387202536	1428201542	8300835472	7737710950	6597428602	8.11335e+08	0.014718	6.1433	2.96071	up
V3271	PC 39:5	4.92843e+08	2.97109e+08	5.16505e+08	4.82679e+08	3.7063e+08	2.25089e+08	4.1713e+07	4.7246e+07	4.6535e+07	3.83608e+07	3.37636e+07	4.0146e+07	2.5616e-05	0.10389	1.04933	down
V3274	PG 44:11	2.70584e+07	3.78981e+07	3.1734e+07	3.92914e+07	3.13739e+07	2.37838e+07	7.8661e+07	2.8196e+08	1812706850	1407624196	1299630977	4.80766e+08	0.013449	28.049	1.46836	up
V3372	PI 40:6	3.10679e+07	5.07454e+07	5.04906e+07	4.99593e+07	3.56486e+07	6.31799e+07	460291072	3.35728e+08	5.42417e+08	4.93299e+08	4.40009e+08	1.93362e+08	3.6973e-05	8.7698	1.04564	up
