# Supplementary material for: Lipidomic Analysis on Gender-Dependent Hepatocellular Carcinogenesis in Hras12V Transgenic Mice
Source: Preprints.org preprint supplement (doi:10.20944/preprints202311.1406.v1), 2023-11-22
Supplement: Supplementary file 2 [file supplementary › Table.S4.xlsx]

## Sheet: Male
Table S4. Detailed information for Venn diagrams
Names	Total	Elements
MPvsMW MTvsMP MTvsMW	55	DG 40:5
		TG 51:3
		TG 60:11
		TG 62:12
		PC 40:4
		PC 40:8
		TG 62:14
		PC 42:6
		TG 60:9
		TG O-40:7
		TG 62:13
		TG 51:4
		TG 60:12
		TG 62:12
		DG 38:4
		FA 17:0
		PC 35:2
		DG 36:2
		LPE 18:2
		TG 60:10
		TG 60:10
		TG 62:13
		DG 40:7
		SM 34:0
		PC 40:3
		DG 42:7
		TG O-42:8
		TG 60:13
		LBPA 44:12
		PC 38:2
		PC 32:2
		PC 38:2
		TG 62:14
		FA 22:1
		DG 40:7
		phSM 39:3
		DG 40:7
		PC 33:2
		Co 8:0
		TG 60:12
		TG 58:10
		PC 40:4
		TG 60:9
		TG O-40:7
		TG 60:11
		DG 36:2
		PC 34:4
		FA 20:0
		Co 8:0
		TG 62:11
		PC 36:6
		LPC 17:1
		PEt 31:0
		DG 42:7
		TG 60:12
MPvsMW MTvsMP	37	PE 38:5
		PC 36:2
		PC 32:1
		LPC 19:1
		CE 0:0
		MePC 39:6
		LPC 18:1
		PC 41:7
		TG 60:11
		LPC 20:4
		TG O-56:5
		DG 40:4
		TG O-58:6
		TG O-42:7
		LPE 20:4
		TG O-56:7
		PC 34:0
		FA 24:1
		PC 40:7
		PC 42:10
		LBPA 40:6
		PC 38:6
		LPC 22:5
		PC 40:5
		LPC 20:1
		TG 58:10
		DG O-36:4
		PC 37:3
		PC 36:5
		PG 38:3
		PS 42:5
		PG 40:6
		LBPA 38:5
		LPC 18:1
		TG 52:1
		TG 50:5
		PC 38:3
MPvsMW MTvsMW	130	TG O-40:6
		PC 30:0
		TG O-36:3
		PC 35:6
		PC 40:5
		BMP 36:6
		Cer 34:1
		TG 54:4
		PC 40:8
		PC 39:3
		PC 38:5
		LPC 22:3
		PE 38:5
		PE 38:9
		PC 30:1
		PC 34:5
		PC 40:7
		Cer 39:1
		Cer 42:5
		Cer 41:2
		BMP 38:8
		Cer 40:2
		FA 22:3
		FA 20:2
		PC 37:1
		TG 58:8
		PC 37:6
		TG 58:7
		LPC 15:2
		Cer 41:4
		PC 33:1
		TG 51:2
		TG 58:5
		SM 36:4
		PC 37:2
		PC 35:1
		PE 34:2
		d5-TG 54:6
		TG 60:7
		PG 42:8
		Cer 43:1
		TG 58:7
		TG 60:12
		PE 36:3
		TG 53:2
		WE O-42:4
		Cer 41:2
		TG 60:9
		LPC 20:5
		d5-TG 56:5
		DG 38:5
		phSM 36:1
		PG 44:11
		PC 42:5
		Cer 41:2
		d5-TG 52:5
		TG 59:3
		TG 54:4
		LPE 16:0
		PC 32:1
		PC 40:4
		PC 41:6
		Cer 42:1
		FA 24:4
		PC 42:6
		TG 56:5
		DG 36:1
		TG 60:9
		Cer 40:1
		d5-TG 56:8
		SL 33:0+O
		MePC 37:1
		TG O-36:3
		FA 18:4
		PC 38:5
		OAHFA 47:5
		PC 39:6
		FA 24:0
		TG 51:2
		TG 54:3
		PC 34:3
		TG 58:6
		TG O-36:3
		Cer 34:1
		LPC 20:0
		PG O-48:1
		Cer 40:2
		TG 56:6
		PC 38:4
		PC 38:5
		PC O-36:2
		PE 36:3
		FA 22:5
		d5-TG 54:6
		FA 20:2
		PG 34:2
		PC 40:3
		Cer 42:4
		TG 58:10
		FA 22:0
		Cer 40:1
		FA 19:0
		TG 58:6
		PE 34:2
		Cer 42:2
		FA 22:4
		PC 38:1
		MePC 39:3
		TG 54:3
		PC 39:4
		TG 58:9
		PC 38:8
		TG 51:1
		DG 38:5
		FA 24:5
		LPE 16:0
		Cer 40:2
		TG 58:9
		Cer 34:1
		TG 56:2
		PC 32:0
		TG 53:3
		TG 60:8
		Cer 41:2
		Cer 42:2
		TG 59:4
		TG 49:2
		TG 51:3
		Cer 40:2
		TG 54:1
MTvsMP MTvsMW	137	phSM 44:4
		DG 38:5
		TG 54:6
		TG 58:12
		TG 62:13
		DG 34:1
		LPC 17:0
		TG 58:11
		LPC O-18:3
		DG O-33:6
		TG O-38:6
		LPC 20:4
		DG 34:2
		TG 58:11
		FA 17:1
		TG 60:9
		LPC 19:2
		PI 40:6
		TG O-52:2
		DG 40:6
		Cer 43:2
		DG 40:6
		TG 54:8
		TG 52:7
		LPC 20:3
		DG 36:3
		TG 66:17
		LBPA 34:1
		TG 56:7
		TG 64:16
		TG 62:11
		DG 40:4
		SM 48:8
		PC 44:12
		LPC 18:2
		LPC 17:0
		FA 18:3
		TG O-54:4
		DG 38:2
		LPC 20:2
		PC 37:4
		TG 54:5
		PC 38:7
		PC 34:5
		LPC O-27:8
		TG 58:10
		LPC 18:2
		PE O-20:3
		TG 54:3
		LPC O-16:0
		TG 64:16
		TG 66:18
		FA 18:2
		TG O-40:7
		Cer 36:1
		PC 35:3
		PC 32:2
		LPC 18:2
		Co 9:0
		DG 38:5
		DG 36:4
		PC 34:3
		TG 58:7
		TG 58:10
		TG O-40:7
		TG 53:4
		PG O-50:5
		LPC 18:2
		TG 52:5
		PG O-25:0
		CAR 20:4
		LPC 22:6
		TG 54:7
		TG O-38:3
		DG 38:6
		TG 64:15
		Cer 41:2
		DG 38:5
		TG O-40:8
		PG O-43:7
		TG 60:11
		LPC O-20:4
		PC 40:9
		LPC 20:5
		PC 38:7
		TG 54:7
		DG 36:4
		TG 54:3
		PC 40:8
		PEt O-44:7
		TG O-32:0
		DG 34:1
		LPC 20:5
		TG 60:6
		d5-TG 55:5
		PC 40:9
		TG 54:3
		DG 40:6
		Cer 37:1
		PC 42:11
		TG 60:13
		DG 40:4
		PC 38:7
		TG O-42:6
		DG 38:5
		LPC 16:1
		LPC O-18:1
		WE O-53:13
		TG O-38:5
		PC O-44:4
		TG 60:15
		DG 38:6
		Cer 41:2
		PE 40:7
		DG 36:4
		PC 33:3
		PC 38:6
		DG 40:6
		DG 34:2
		TG 58:11
		TG 66:18
		TG 51:11
		DG 40:6
		PG 42:10
		DG 38:6
		DG 42:7
		TG 62:12
		CAR 16:0
		PE 43:8
		TG 62:12
		TG O-42:6
		PC 38:7
		CAR 18:0
		TG O-38:4
		TG O-52:3
		LPC O-27:8
		PC 38:8
MPvsMW	44	TG 55:5
		PC 36:5
		PC O-34:2
		LPC 15:0
		PE 36:4
		TG O-38:5
		TG 52:1
		PE 36:2
		TG 48:1
		TG 60:8
		SM 42:2
		PE 41:4
		PC 38:3
		PC 39:5
		TG 48:2
		MePC 37:4
		TG 55:5
		TG 54:1
		BMP 40:6
		PC O-40:5
		PC 40:5
		PE 38:5
		LBPA 40:7
		LPC 20:4
		PG 38:5
		LPC 19:0
		LBPA 40:6
		PC 36:5
		PC 40:5
		PC 42:7
		TG 52:5
		TG 46:1
		LPC 21:4
		TG 56:2
		PG 42:7
		FA 20:4
		TG O-36:2
		PC 36:3
		PE 34:3
		PE 36:2
		PC 44:13
		FA 18:1
		TG 58:3
		LBPA 36:2
MTvsMP	61	PC 34:3
		SM 45:10
		Cer 36:1
		DG 38:7
		PC 40:9
		PE 38:6
		LPC 23:6
		TG O-52:2
		PE 36:5
		TG 60:4
		DG 33:4
		PI 40:9
		TG 60:8
		PG 36:4
		TG 54:7
		FA 19:1
		TG O-58:8
		TG 54:6
		TG 59:2
		DG 36:5
		TG 62:13
		TG 54:7
		PC 44:12
		PC 44:14
		TG 54:2
		TG 53:5
		d5-TG 54:8
		LPC 19:1
		PC 34:1
		PS 40:3
		PG 40:7
		DG O-31:3
		TG 52:5
		SM 42:3
		PG 34:2
		PC 41:8
		LPC 22:5
		DG 32:1
		FA 18:0
		TG 66:16
		LPC 18:1
		TG 56:7
		Cer 42:1
		TG 60:13
		Cer 42:3
		TG 54:2
		TG O-54:6
		TG 56:11
		LPC 20:1
		PC 37:3
		TG 60:13
		DG 36:2
		TG 54:6
		PC 40:7
		TG 50:1
		TG O-58:7
		PG 40:7
		VAE 16:1
		PC 38:6
		TG 57:7
		PC 39:7
MTvsMW	50	PC 41:7
		FA 16:0
		Cer 41:2
		DG 38:2
		TG 52:2
		HexCer 42:2
		PC 35:5
		PC 35:2
		DG 36:1
		PE 40:8
		PE 36:2
		TG 52:4
		PE O-36:6
		DG 36:2
		DG 38:3
		PC 36:4
		TG 52:4
		LBPA 34:2
		MGDG 40:9
		PC 37:2
		TG 64:13
		PS 38:1
		TG 56:3
		FA 20:5
		LPE 14:0
		PC 34:2
		PE 38:7
		TG 50:4
		Cer 41:3
		PC 37:1
		LPC 18:3
		TG 54:3
		PC 40:7
		PC 38:7
		PC 36:4
		DG 34:2
		TG 50:4
		PG O-46:2
		PC 37:2
		PC 38:5
		TG 56:3
		Cer 42:5
		TG 60:9
		TG 56:9
		TG 52:2
		SM 34:1
		PC 37:4
		SM 40:2
		TG 54:6
		PE 38:6

## Sheet: Female
Table S4. Detailed information for Venn diagrams
Names	Total	Elements
FPvsFW FTvsFP FTvsFW	49	FA 20:5
		TG O-40:6
		DG 40:5
		TG 58:4
		ST 24:1+O4
		DG 38:2
		LPC 17:0
		PC 40:5
		TG 56:4
		Cer 34:1
		FA 20:3
		PG O-43:7
		LBPA 40:7
		phSM 39:3
		TG 51:4
		LPC 20:5
		PC 38:7
		TG 54:7
		Co 8:0
		TG 58:10
		LPC 20:5
		FA 22:3
		FA 20:2
		TG 60:6
		LPC 20:1
		TG 58:10
		SM 48:8
		TG 58:5
		LPC 17:0
		DG 38:2
		TG 52:7
		TG 56:3
		LPC 20:5
		Co 8:0
		FA 24:5
		TG 54:7
		TG 62:11
		TG 51:11
		Cer 34:1
		TG O-38:4
		TG O-42:8
		TG 53:5
		Co 9:0
		FA 24:4
		PC 38:7
		TG 58:10
		TG 56:3
		LPC O-27:8
		TG 54:7
FPvsFW FTvsFP	13	DG 34:2
		DG 36:4
		TG 52:7
		Cer 42:3
		TG O-56:5
		DG 36:5
		DG 36:2
		TG O-38:5
		TG O-58:6
		TG 58:11
		TG 33:2
		TG O-56:7
		TG 58:7
FPvsFW FTvsFW	92	PC 38:5
		PC 39:5
		TG 51:3
		TG 60:13
		FA 18:4
		TG 58:11
		PC 38:5
		Cer 41:2
		TG 52:5
		PC 39:6
		TG 60:6
		PC 40:5
		FA 21:5
		FA 24:1
		TG O-36:4
		PG 34:2
		TG 56:11
		TG 58:10
		LPC 22:5
		TG O-36:4
		TG 58:11
		TG 50:4
		BMP 36:6
		TG 55:8
		Cer 40:2
		d5-TG 55:6
		PE 38:7
		PC 38:5
		PC O-36:2
		PG O-44:3
		PC 38:5
		PE 36:3
		TG 58:11
		TG 54:8
		PE 36:2
		FA 20:2
		PC 38:1
		LPE 20:5
		Cer 42:5
		Cer 41:2
		d5-TG 58:12
		PC 40:5
		PC 40:5
		TG 55:7
		FA 24:5
		TG 58:10
		LPC 15:2
		TG 57:5
		LPE 18:2
		SM 44:6
		TG 56:10
		LPC 20:1
		PE O-36:4
		PC 40:5
		TG 58:9
		FA 22:4
		TG 52:6
		TG 52:3
		PE 34:2
		TG 54:8
		TG 52:5
		TG 56:9
		TG 60:13
		PE 41:4
		TG 52:6
		PE 36:3
		PC 36:3
		PC 38:5
		TG 56:7
		TG 50:5
		TG 58:5
		Cer 42:5
		PG O-50:8
		d5-TG 58:11
		TG 56:9
		Cer 41:2
		TG 54:7
		MePC 37:4
		TG 60:8
		TG 52:7
		PG O-41:4
		PC 41:6
		PC 36:3
		TG 54:9
		Cer 40:2
		Cer 40:2
		TG 54:8
		TG 53:4
		PG O-50:5
		PC 38:3
		TG 56:10
		PC 38:8
FTvsFP FTvsFW	152	PG O-25:0
		LBPA 44:12
		LPC 22:6
		TG 62:12
		phSM 44:4
		PC O-32:0
		TG 54:7
		DG 38:5
		TG O-38:3
		SM 42:3
		PC 38:2
		PC 32:2
		TG 61:3
		DG 38:6
		DG 34:1
		TG 58:11
		TG 54:3
		LPC O-18:3
		DG O-33:6
		TG O-38:6
		DG 38:5
		TG 60:9
		PC 37:3
		DG 32:1
		DG 40:7
		TG O-40:7
		Cer 34:1
		TG 62:13
		PI 40:6
		LBPA 40:6
		TG 48:2
		PC 37:4
		PC 40:9
		TG 60:12
		TG 62:12
		DG 38:4
		DG 33:4
		DG 40:7
		DG 40:6
		PC 33:2
		FA 22:5
		TG 54:3
		TG 56:7
		TG 60:12
		DG 36:3
		FA 17:0
		PC 38:6
		PC 40:8
		PEt O-44:7
		PE O-36:6
		PC 36:5
		TG O-32:0
		PG 36:4
		PC 35:2
		DG 34:1
		Cer 40:2
		TG 54:7
		TG 56:7
		TG 48:1
		TG 58:8
		TG 54:2
		PC 37:6
		TG 54:6
		d5-TG 55:5
		TG O-40:7
		PC 40:9
		TG 54:3
		TG 59:2
		DG 40:6
		Cer 37:1
		TG 60:11
		PC 42:11
		TG 60:13
		DG 40:4
		PC 44:12
		PC 38:7
		DG 36:2
		LBPA 40:6
		DG 40:4
		PC 38:7
		TG 60:10
		MePC 41:11
		TG O-42:6
		PC 35:1
		TG 60:10
		DG 36:2
		TG 62:13
		DG 42:9
		DG 36:2
		DG 38:5
		DG 38:4
		Cer 35:0
		TG 58:7
		TG 54:5
		PC 38:3
		PC 38:7
		TG 46:1
		PC O-44:4
		DG 40:7
		DG 38:3
		PC 34:5
		DG 38:6
		TG 54:3
		DG 38:3
		LPC O-27:8
		PE 40:7
		PC O-38:4
		TG 58:10
		TG 46:2
		PC 40:7
		DG 36:4
		LPC 18:2
		TG 55:3
		PG 44:11
		DG 34:2
		TG 54:3
		DG 42:7
		LPC O-16:0
		TG 48:2
		TG 50:1
		TG 59:3
		MGDG 40:9
		PC 36:6
		DG 38:6
		DG 42:7
		CAR 16:0
		Cer 38:2
		TG 54:2
		PE 43:8
		TG 52:1
		TG 60:13
		DG 38:3
		TG O-40:7
		Cer 36:1
		VAE 16:1
		d5-TG 54:8
		PEt 31:0
		LPC 18:2
		TG 62:12
		PC 38:6
		TG O-42:6
		DG 38:5
		TG 57:7
		DG 42:7
		DG 38:3
		DG 36:1
		TG O-38:4
		CAR 18:0
		TG 58:3
		LPC 18:2
		DG O-31:3
		TG 52:5
FPvsFW	73	SM 45:10
		PC O-40:5
		PC 40:8
		TG 62:13
		TG 50:6
		SM 36:1
		PC 38:7
		FA 22:1
		d5-TG 52:5
		PG O-48:1
		Cer 40:3
		PEt 36:4
		TG 50:5
		TG 58:10
		LPE 20:5
		DG 40:6
		PC 40:8
		TG 58:12
		LPC 19:1
		TG 50:5
		CE 0:0
		MePC 39:6
		SM 42:2
		LBPA 34:1
		TG 55:8
		PE 36:2
		SM 41:2
		LPE 20:4
		LPC 18:3
		TG O-58:8
		TG 57:9
		TG 56:10
		PG 38:5
		TG 48:4
		DG 40:4
		PC 39:4
		PC 36:5
		TG 58:11
		PC 36:5
		FA 18:3
		TG 54:7
		PG O-46:2
		LPC 22:6
		TG 60:12
		LPC 21:4
		TG O-36:4
		FA 24:2
		Cer 41:2
		PG 42:7
		PC 38:8
		PC 39:5
		PC 40:3
		d5-TG 56:5
		LPE 16:0
		TG 54:6
		PI 38:6
		TG 50:6
		DG 40:6
		TG O-42:7
		TG 57:8
		TG 55:9
		TG 57:9
		LPC 13:0
		LPC 22:4
		PC 40:2
		PI 36:2
		PE 36:2
		TG 50:6
		SM 40:2
		TG O-38:7
		TG 56:10
		TG 50:5
		d5-TG 55:6
FTvsFP	56	PC 34:3
		TG 31:2
		PC 34:2
		TG 35:6
		Cer 36:1
		DG 38:7
		LPC 23:6
		OAHFA 20:1
		PC O-36:5
		PC 41:8
		PC 34:3
		TG O-36:3
		DG 32:1
		PC 42:10
		TG O-40:6
		LPC 19:2
		TG O-52:2
		DG 36:1
		PG 40:7
		MePC 27:3
		PC 35:4
		LPC 20:4
		PG O-25:1
		PC 40:4
		DG 40:5
		PC 40:7
		PC 33:1
		PC 37:3
		MePC 23:1
		LPE 18:0
		TG 33:3
		LPE 18:0
		TG 48:3
		TG 55:1
		TG O-54:4
		PE 36:4
		TG 50:2
		PS 42:5
		OAHFA 20:1
		WE O-53:13
		TG O-37:7
		TG 31:2
		TG 55:2
		DG 34:1
		TG 33:4
		DG 40:6
		PE O-20:3
		NAGly 41:4
		PG O-30:1
		TG 48:1
		DG 24:5
		DG 36:4
		Cer 34:1
		TG 33:3
		PS 40:3
		PG 40:7
FTvsFW	47	PC 32:2
		TG 54:6
		TG 54:6
		TG 54:5
		TG 52:2
		PC 36:5
		LPC 20:4
		TG 59:8
		FA 18:1
		TG 58:6
		DG 36:3
		PC 36:1
		FA 17:1
		LPI O-10:0
		PE 38:9
		LPE 22:6
		TG 60:11
		BMP 38:8
		DG O-22:3
		SM 36:4
		PC 36:4
		Cer 42:2
		TG 50:4
		PG 42:8
		TG 54:8
		TG 56:2
		TG 60:9
		TG 56:4
		d5-TG 52:5
		FA 24:6
		PG 42:10
		TG 60:8
		TG 56:2
		SM 44:5
		FA 18:2
		PC 37:5
		TG 53:3
		PG 40:7
		Cer 42:2
		PC 40:8
		PC 37:4
		TG 56:5
		FA 18:1
		TG 57:4
		TG 50:4
		LBPA 36:2
		PE 38:6
