# Supplementary material for: Lipidomic Analysis on Gender-Dependent Hepatocellular Carcinogenesis in Hras12V Transgenic Mice
Source: Preprints.org preprint supplement (doi:10.20944/preprints202311.1406.v1), 2023-11-22
Supplement: Supplementary file 2 [file supplementary › Table.S5.xlsx]

## Sheet: MW vs FW
Table S5. Detailed information for DELs of horizontal comparisons between sexes.
Identification number	Lipid name	MW						FW						Paired comparison
		MW1	MW2	MW3	MW4	MW5	MW6	FW1	FW2	FW3	FW4	FW5	FW6	MW/FW p value	MW/FW FC	MW/FW VIP	MW/FW regulation
V94	LPE 14:0	2.39695e+08	3.42983e+08	1074827125	7.75196e+08	5.57796e+08	342565997	2.28439e+08	222348019	3.11994e+08	2.23503e+08	3.32431e+08	1.82853e+08	0.043742	2.2197	1.07093	up
V120	LPC 15:0	328940014	311898433	4.57385e+08	4.26997e+08	6.49646e+08	3.38616e+08	1.67447e+08	1.60117e+08	1.9156e+08	2.28162e+08	2.49881e+08	1.86979e+08	0.0020892	2.1226	1.06627	up
V128	LPC 16:1	2752776817	3076945437	6331016249	5831433074	4495988595	3006587011	1667661777	1495053711	2480490581	1826600430	1850556923	1074713922	0.003464	2.4526	3.40704	up
V130	LPC 16:0	7.47421e+08	8.35921e+08	1205919463	1021480334	1179070574	7.28203e+08	4.21024e+08	5.31419e+08	6.90914e+08	3.07473e+08	1010884425	7.35339e+08	0.031181	1.5466	1.33828	up
V150	LPC 17:1	6.08864e+08	5.02938e+08	8.72948e+08	8.88496e+08	1097511831	503119314	2.9746e+08	2.39076e+08	3.12939e+08	3.10117e+08	4.00478e+08	2.79815e+08	0.0015345	2.4316	1.51947	up
V170	LPC 18:3	11896819032	13166114482	6857394029	8399112384	13915199977	9274460901	14835494307	17952244278	24403288154	19472899386	17806248012	17953606088	0.00082731	0.56491	6.39826	down
V171	LPC 16:0	1331296945	1991169202	3296302504	3405778944	2890562224	1483740782	1218115200	9.96789e+08	8.52716e+08	712583434	1679673260	8.44806e+08	0.0072037	2.2838	2.57395	up
V211	LPC 18:2	4.52828e+08	5.54731e+08	6.87222e+08	6.06747e+08	5.17405e+08	3.61687e+08	3.35471e+08	2.31573e+08	2.55195e+08	2.02822e+08	5.22493e+08	3.42636e+08	0.009023	1.6827	1.03776	up
V219	LPC 20:3	10307479081	10547601019	14071868040	15526287165	12119783190	8209805700	8124665492	8017020467	7270242657	5764834409	8627523704	8487860585	0.0060268	1.529	4.50851	up
V223	LPC 20:2	1396334121	1333333666	2521413018	2873108583	2553719761	9.7946e+08	7.47369e+08	7.35539e+08	8.10233e+08	7.08112e+08	1301769300	9.07682e+08	0.00648531	2.2372	2.32464	up
V226	LPC 20:1	1567726372	1795964021	4456650433	5164672245	4783362147	1414933049	8.18163e+08	6.02068e+08	7.3969e+08	6.52301e+08	1221526619	8.42036e+08	0.0085157	3.9344	3.4209	up
V228	LPC 20:0	2057284920	1832470449	9.74216e+08	9.58932e+08	2252733329	1733144670	1.17781e+08	9.3464e+07	1.49075e+08	1.34358e+08	1.92665e+08	1.21447e+08	5.4288e-05	12.128	2.7643	up
V244	LPC 19:0	387749605	3.50325e+08	5.91447e+08	5.65782e+08	9.56326e+08	4.65744e+08	1.76773e+08	1.35649e+08	1.58077e+08	154876477	3.1555e+08	1.68356e+08	0.00394775	2.9906	1.38337	up
V265	LPC 22:5	2884094400	2811061954	3246646154	4396209410	4656908429	1685165358	1683712511	1400248327	1725850886	1285656705	2747902844	2092148073	0.01537	1.7996	2.81209	up
V267	LPC 22:5	3.84987e+08	3.25942e+08	2248274996	2337073358	3.03752e+08	317146949	2.30034e+08	1.66644e+08	1.86879e+08	1.76853e+08	2.76324e+08	1.27267e+08	0.00394775	5.0835	1.6252	up
V270	LPC 20:1	2.28628e+08	2.83813e+08	5.35423e+08	626465714	2.37091e+08	1.20892e+08	4.17482e+07	5.54963e+07	3.51666e+07	4.36965e+07	5.54693e+07	5.07524e+07	0.0046891	7.1984	1.17066	up
V271	LPC 20:1	3866351509	4000927726	7160600959	9010593504	8599599556	1621999238	6.8548e+08	1454910240	1174611185	7.20898e+08	1164194610	1189192109	0.0034866	5.3621	4.855	up
V280	LPC 20:0	1.17401e+08	1.10591e+08	7.62087e+07	7.99675e+07	1093205150	6.52441e+07	1.10777e+07	8.90082e+06	1.30472e+07	7.87253e+06	1.00841e+08	6.84511e+07	0.0249747	7.3391	1.00613	up
V281	LPC 22:3	1438377250	1111069211	517632879	5.73835e+08	1828451858	8.1638e+08	6.49604e+07	5.23209e+07	6.51873e+07	5.10078e+07	3.44459e+07	2.63881e+07	0.00078161	21.358	2.20368	up
V354	Cer 40:2	1486391793	1434253853	4.80245e+08	5.38413e+08	1070318278	9.81932e+08	2.84851e+08	1.92992e+08	3.06433e+08	2.35634e+08	3.14119e+08	2.60677e+08	0.0019025	3.7572	1.8292	up
V355	Cer 40:2	7.18765e+08	811252540	8.30407e+08	1012062757	1303006400	4.82499e+08	1.83258e+08	2.09757e+08	1.7776e+08	1.62624e+08	1.94056e+08	1.99289e+08	0.00014716	4.5778	1.91882	up
V359	Cer 40:1	1010590920	1132065310	2.24483e+08	2.44443e+08	5.57969e+08	6.77057e+08	1.46147e+08	1.51437e+08	1.61008e+08	143449962	1.2945e+08	1.82347e+08	0.010178	4.2093	1.41869	up
V371	DG 34:2	2813764407	3392036437	2561184572	3255196275	4798735905	2413721907	5560497424	6364038306	5387562577	3845994678	6695974555	6341924304	0.0011255	0.56248	3.59184	down
V392	Cer 41:2	5.44029e+08	4.9463e+08	4.09449e+08	514759491	4.10952e+08	2.51334e+08	1.76474e+08	2.19112e+08	2.39921e+08	1.86596e+08	2.38186e+08	2.18848e+08	0.00053082	2.0523	1.08297	up
V399	TG O-36:4	1.25349e+08	137745974	1.05608e+08	1.07575e+08	2.3875e+08	1.17759e+08	3.80857e+08	4.74316e+08	3.67315e+08	2.85124e+08	9.19661e+08	7.69733e+08	0.00394775	0.26049	1.42846	down
V405	TG O-36:3	2.36892e+08	3.16251e+08	4.89155e+08	6.0956e+08	6.83629e+08	2.38753e+08	1219305801	1232090447	1120021883	9.64359e+08	1399571770	1503981461	2.6849e-05	0.34603	2.10022	down
V410	Cer 40:2	1486584997	1483334256	5.01287e+08	5.55266e+08	1037968459	984174830	3.04203e+08	2.42393e+08	3.43046e+08	2.62519e+08	3.37758e+08	2.66876e+08	0.0022529	3.443	1.80169	up
V411	Cer 40:2	819907640	8.93092e+08	8.89943e+08	1098277607	1378285607	532382616	191067657	2.09509e+08	1.30864e+08	1.93453e+08	2.15617e+08	213671870	0.00394775	4.8622	2.02961	up
V447	Cer 41:4	6.08622e+08	5.6487e+08	1.6322e+08	1.57831e+08	3.60069e+08	4.27625e+08	6.85945e+07	5.75235e+07	8.34243e+07	6.95557e+07	7.71819e+07	8.4779e+07	0.0029745	5.1744	1.16806	up
V448	WE O-42:4	9.30209e+08	9.9027e+08	6.49794e+08	7.24318e+08	8.78685e+08	6.7283e+08	4.3364e+08	3.91678e+08	4.55407e+08	3.45572e+08	5.36684e+08	4.5566e+08	0.00018196	1.8506	1.38813	up
V457	TG O-36:4	1.07536e+08	1.10601e+08	9.00883e+07	6.98337e+07	2.39012e+08	1.10554e+08	3.32258e+08	2.88588e+08	2.96635e+08	1.41904e+08	4.36468e+08	5.3326e+08	0.00648531	0.35859	1.05959	down
V458	DG 36:4	8.14956e+08	971942132	9.34418e+08	1201808535	1057614534	9.05238e+08	1384996366	1423322539	1371870217	1157286651	2055503689	1746362536	0.0034571	0.64403	1.675	down
V459	TG O-36:4	9.10876e+08	1101620479	7.78051e+08	7.7847e+08	1844015510	9.67255e+08	3059262004	3622196080	2882957742	2182902305	6717551084	6330855361	0.00394775	0.25731	4.0007	down
V461	Cer 41:2	651892296	5.25972e+08	4.6119e+08	6.22591e+08	4.70397e+08	2.88937e+08	1.96309e+08	2.34844e+08	2.92922e+08	2.19749e+08	2.50994e+08	248050644	0.00074958	2.0937	1.16414	up
V466	TG O-36:3	3549437715	4362018165	6549830357	8522933812	10362164811	3388851066	18485069708	21142485155	17200901590	15138087764	22176368255	23804049318	1.8015e-05	0.31146	8.59445	down
V471	DG 36:2	3698260068	3924891770	4865047631	6211464901	5977764042	2473090741	10164002239	11308268553	7530801053	6353400721	9180938454	8609926158	0.00093137	0.51085	4.41754	down
V474	TG O-38:7	148257358	1.72867e+08	103880465	111214588	1.84589e+08	1.43145e+08	4.6025e+08	4.12282e+08	2.8416e+08	2.21157e+08	3.85936e+08	4.83651e+08	0.00036892	0.38442	1.05745	down
V475	DG 36:4	4.0534e+08	5.32766e+08	5.50693e+08	5.87155e+08	7.93014e+08	6.24452e+08	8.94503e+08	7.49192e+08	7.39408e+08	5.85279e+08	1274312790	1432261094	0.031962	0.61559	1.39059	down
V477	DG 36:1	5.14207e+08	5.2786e+08	6.1384e+08	8.17974e+08	7.49812e+08	3.28556e+08	1418162922	1574712743	8.17397e+08	6.82357e+08	1173597825	1044728629	0.0074335	0.52932	1.41693	down
V480	TG O-36:3	2579325845	3393722764	5843550452	6861972373	8088343008	3122849188	17539010500	15845505418	13560190625	11750172980	17434138431	20226459295	3.0995e-05	0.3102	7.6894	down
V483	Cer 42:5	1217930173	1434174779	1356208564	1652967466	1898035169	9.44619e+08	3.45895e+08	3.35261e+08	342198790	3.26901e+08	312433591	3.56492e+08	1.2495e-05	4.2116	2.45789	up
V485	DG 36:2	4736865808	4974044224	6677583626	7823508071	7487616800	3790265210	11833778636	11527865746	8586872059	8130612949	10392643144	11278405396	0.00083428	0.57473	4.48757	down
V486	TG O-36:2	2.42329e+08	2.5493e+08	3.71188e+08	4.68794e+08	4.18738e+08	2.307e+08	8.97428e+08	647727192	5.29422e+08	4.35012e+08	5.87804e+08	6.89038e+08	0.0029489	0.52468	1.11816	down
V490	Cer 42:4	1234335057	1354417556	330902390	3.1442e+08	7.38119e+08	9.53805e+08	2.21009e+08	2.08186e+08	2.4257e+08	228950218	1.74726e+08	2.46919e+08	0.0077122	3.7252	1.58117	up
V496	DG 36:1	1653985608	1843963926	2597127386	2768076118	2790613283	1392029342	4819753473	4181933093	2726951784	2386188778	3842293035	3724066427	0.0093625	0.60171	2.35711	down
V508	Cer 42:2	1236934404	1373122071	8.28981e+08	9.39543e+08	1125621217	8.43815e+08	5.55821e+08	487765378	5.9117e+08	4.36284e+08	6.12109e+08	525315933	0.00025558	1.9785	1.63541	up
V528	DAP O-36:7	6.43134e+07	1.40971e+08	2.22508e+08	2.46468e+08	2.76577e+08	6.0779e+07	5.08473e+08	2.72139e+08	4.20601e+08	3.9219e+08	4.78867e+08	5.03613e+08	0.0006063	0.39273	1.13874	down
V532	DG 38:6	2.11231e+08	1.9815e+08	189439429	2.13177e+08	2.87413e+08	1.93592e+08	315029212	4.08767e+08	4.62155e+08	308706762	5.23772e+08	4.10672e+08	0.00394775	0.5323	1.01204	down
V533	DG 38:6	1893569263	1895425207	1837341864	2263029630	1458461134	1854182730	2312224019	2959882573	3186772955	2635126350	4806292375	3616921637	0.0041676	0.57396	2.5754	down
V540	TG O-38:5	2.07672e+08	2.55307e+08	2.0033e+08	1.52427e+08	2.69908e+08	1.93204e+08	4.26058e+08	314954053	4.5143e+08	2.61937e+08	8.79183e+08	5.48185e+08	0.015404	0.44378	1.13149	down
V543	TG O-38:5	5.53501e+08	6.39441e+08	7.1305e+08	7.93383e+08	8.76377e+08	5.78176e+08	1089558867	1117396322	9.55541e+08	7.11596e+08	2394286005	2360215116	0.035541	0.48141	1.93867	down
V552	PEt 31:0	1121580473	1216889952	1018252782	1118889623	7.78935e+08	1192086249	1255088799	1755720869	1695838541	1536405468	2403314037	1833623910	0.0026035	0.61514	1.78748	down
V555	DG 38:5	2.23021e+08	5.95749e+08	481706030	7.22481e+08	4.58964e+08	4.44661e+08	6.41679e+08	1059269897	7.80735e+08	8.2626e+08	1332568303	5.31908e+08	0.021311	0.56581	1.21472	down
V558	TG O-40:8	2.23723e+08	2.98622e+08	2.92167e+08	3.05035e+08	3.18872e+08	2.49468e+08	4.48328e+08	4.44446e+08	3.72253e+08	301388611	773385026	8.76028e+08	0.024229	0.52487	1.11418	down
V559	DG 38:2	8.07542e+08	9.08031e+08	1051810688	1389495909	1502059395	5.07873e+08	4.6474e+08	5.88204e+08	3.36345e+08	303131771	4.71426e+08	4.5874e+08	0.0037597	2.3514	1.75009	up
V568	TG O-40:7	8.2884e+07	1.07902e+08	1.36743e+08	1.67101e+08	3.83713e+08	9.43097e+07	3.05821e+08	3.31259e+08	3.34232e+08	1.87824e+08	5.19431e+08	4.93947e+08	0.0249747	0.44771	1.06416	down
V577	DG 38:3	3.95737e+08	4.35305e+08	1051628451	1135382617	6.88559e+08	2.16042e+08	3.92651e+08	2.46724e+08	2.91139e+08	2.35793e+08	2.91452e+08	2.64016e+08	0.038691	2.2783	1.22706	up
V582	DG 38:2	1030488834	1128741306	1741554482	2184410191	2309907592	7.50769e+08	7.42781e+08	7.96027e+08	5.01498e+08	503609556	663566872	7.16777e+08	0.0090088	2.3306	2.08622	up
V604	DG 40:7	2.8051e+08	3.26206e+08	3.40613e+08	3.87534e+08	1180435744	2.82136e+08	8.67288e+08	1120765213	1102373444	4.5683e+08	1231317916	1071213324	0.037373	0.47821	1.61779	down
V606	DG 40:7	1946338119	2511180591	2990965790	3504679380	8253832985	2243628408	7057005620	7705199408	7737083702	4463000485	11206825806	11063967512	0.0249747	0.4357	5.09212	down
V613	DG 40:6	1451255798	1301986006	9.74607e+08	1279914398	1539795675	1087015832	2928382783	2665093364	2693524702	2110760584	3438910301	2760045841	1.79e-05	0.46001	2.81437	down
V615	DG 40:6	5.57387e+08	6.32691e+08	5.27391e+08	6.45791e+08	1200024942	4.44081e+08	1083429940	1138224069	1539261827	9.14056e+08	1954786593	1679516651	0.0163092	0.48228	1.98985	down
V626	DG 40:7	8.31761e+08	1062621677	1296952521	1384815770	3055853097	9.4516e+08	2935455139	2653441565	2845963817	1820650706	3564578795	4107213780	0.0249747	0.47844	2.91515	down
V627	SM 33:1	2.16709e+08	1.56465e+08	2.573e+08	304644388	2.13107e+08	1.72044e+08	3.74336e+08	5.75004e+08	5.91968e+08	6.37134e+08	4.71282e+08	3.6538e+08	0.00030781	0.43789	1.19787	down
V637	DG 40:6	1594197769	1456312225	1017791815	1263187858	1586839527	1146717904	2991784502	2291522235	2548808125	2078766915	3051102669	2966221634	5.0016e-05	0.50634	2.59893	down
V639	DG 40:6	2.73045e+08	3.19278e+08	2.64743e+08	312453865	6.18319e+08	2.52203e+08	5.62307e+08	5.14181e+08	7.22706e+08	4.46483e+08	9.66758e+08	9.03244e+08	0.0163092	0.49568	1.38942	down
V674	SM 34:1	1.12166e+08	1.29871e+08	261392320	3.11495e+08	1.85306e+08	3.20361e+08	6.40876e+08	4.84104e+08	305736052	8.00205e+08	3.36537e+08	4.4922e+08	0.007831	0.43776	1.10993	down
V676	PC 30:1	9.40443e+08	8.06842e+08	1494904776	1772794832	620922156	9.45212e+08	5.36354e+08	2.93054e+08	5.81235e+08	6.79939e+08	310215274	1.91673e+08	0.0069935	2.5386	1.73122	up
V679	SM 34:0	3.80428e+08	3.46014e+08	5.39361e+08	499403423	4.08479e+08	4.11337e+08	1031888751	1034323474	9.13318e+08	9.98649e+08	8.63044e+08	1061479514	1.8423e-07	0.43794	1.73789	down
V760	SM 36:4	4.13654e+08	4.34295e+08	3.8082e+08	6.35005e+08	3.95074e+08	2.88812e+08	5.20349e+08	1237593516	8.55562e+08	8.52997e+08	7.03518e+08	6.83003e+08	0.0058328	0.52496	1.28621	down
V775	PC 32:2	8465779535	9104806196	9851361971	11557868895	6554811615	9286989967	5302150007	4337532762	7838989803	8910537589	5249215407	3643345132	0.01267	1.5538	3.73328	up
V780	SM 36:1	1.20013e+08	1.22416e+08	7.41293e+07	7.6709e+07	7.88928e+07	1.56566e+08	368660872	5.16362e+08	4.34998e+08	3.91513e+08	3.05957e+08	3.48839e+08	5.2201e-06	0.2657	1.27822	down
V782	PC 32:1	22966022118	21507686625	16830416210	21916780541	13654233386	18821393603	11807697941	12504512449	13463519845	14068271293	8984412988	6407220024	0.0016026	1.7208	6.57912	up
V786	PC 32:0	2554195775	2380051552	1845179717	2395383358	1501381943	2075456814	1382414824	1368359587	1703260735	1579126816	1165608344	6.83486e+08	0.0040887	1.6178	2.04414	up
V834	PC 33:2	4543050158	4104474677	3020008845	3459915598	4586818181	3494049078	1865831879	1881124166	2074858396	3131038908	2991518218	2748861964	0.002369	1.5795	2.57143	up
V845	PC 33:1	3181333015	2418521293	1920034679	2509103779	2089723422	2044494173	1062475067	1486072246	1345698919	1609422086	1437477760	1052562691	0.00063711	1.7718	2.29064	up
V850	phSM 36:1	1372583229	1029442131	7.8791e+08	1037813702	8.6026e+08	8.72506e+08	477323053	6.34366e+08	5.53251e+08	6.50954e+08	5.97349e+08	4.46254e+08	0.00085835	1.7742	1.4861	up
V873	PC 34:4	1181005368	9.70556e+08	1060184655	1381533220	3.60663e+08	2.77487e+08	1.55744e+08	1.02869e+08	6.87348e+08	8.54909e+08	1.91732e+08	1.09642e+08	0.0249747	2.4885	1.46818	up
V883	PC 34:3	20802713493	23608504309	10702726609	11300118455	11842413419	18275460070	9696658541	10989211041	9648390339	10099307127	10183832996	9841239704	0.024432	1.5967	4.88422	up
V905	PC 34:0	3274303275	3161462132	3643551205	4711812441	3949691712	3534461865	4744872522	6108789457	6198528670	6847039109	6288064747	5900549671	9.0623e-05	0.61725	3.48264	down
V930	PC O-36:5	5.78382e+08	6.3963e+08	4.82573e+08	5.6007e+08	5.58253e+08	459435546	7.43992e+08	1180102990	8.51464e+08	7.58365e+08	9.97222e+08	8.65394e+08	0.00064995	0.60749	1.29751	down
V981	PC 35:1	2949552872	2439727152	2822077753	2982758548	2706070547	2335126717	1336281721	1929885471	1692816591	2390688448	1779490550	1350749629	0.00059514	1.5492	2.18894	up
V993	PC 36:6	2756089073	3226576043	3109675814	4308778136	2872749152	3214390108	1504018195	1293019373	2963961270	2990747051	2243010363	1319946529	0.012814	1.5825	2.11653	up
V1014	PC 36:4	1069569244	2052293994	9.13954e+08	5.24347e+08	1743588884	6.16025e+08	1591393282	1994915030	1779783921	1618321198	1749682556	1866511705	0.039687	0.65277	1.47114	down
V1024	PC 36:3	3114399574	3333246449	4001545990	7058473801	6274530556	2594526296	1344059894	1589748059	1256812405	2147131867	1534871760	8.91273e+08	0.0033426	3.0097	3.76601	up
V1030	SM 40:2	4.90853e+08	5.52661e+08	6.52367e+08	7.84091e+08	1029874137	5.78159e+08	288309903	3.83385e+08	3.46922e+08	3.65913e+08	3.22655e+08	3.42669e+08	0.0020104	1.9943	1.29848	up
V1037	PC 36:2	9.06737e+08	1029997991	8.57143e+08	9.11193e+08	6.79827e+08	1160828636	1243449981	6231384781	1588802487	1709664069	1606956803	1220444308	0.00394775	0.40775	2.01856	down
V1133	PC 37:2	724035375	6.38929e+08	5.52883e+08	9.26151e+08	7.87022e+08	5.04021e+08	1.93919e+08	3.0079e+08	3.64008e+08	5.63039e+08	4.18382e+08	3.3537e+08	0.0024799	1.8998	1.23472	up
V1134	PC 37:2	7.29613e+08	6.13924e+08	3.81714e+08	3.66853e+08	9.1699e+08	6.34939e+08	2.09907e+08	1.90028e+08	2.50121e+08	220799707	2.7495e+08	2.09432e+08	0.0013294	2.6889	1.32598	up
V1141	PC 37:1	6.28191e+08	5.20039e+08	5.38023e+08	672198688	5.83315e+08	4.97085e+08	2.2711e+08	2.22901e+08	2.75705e+08	3.56626e+08	2.47767e+08	8.41967e+07	2.3102e-05	2.4315	1.349	up
V1150	PC 38:7	17427957421	18370230860	19717530057	21893003967	22482797988	16706274763	10122471617	9001588124	18706484597	13340088400	13209985328	9126012532	0.0025134	1.5862	5.64295	up
V1170	PC 38:5	7057574334	6369446376	1234085074	1240964695	3185505212	6008140864	10192148071	8090482397	12594203507	12186945100	8287132792	5469544971	0.0065433	0.44167	5.15819	down
V1190	PC 38:4	1387053034	1476202220	1751159218	1954914858	5897962608	1230094611	7701797472	1971835256	8152286445	1976222149	1869156622	7791849092	0.0249747	0.4649	2.90705	down
V1196	SM 42:3	1110540138	1017442918	1447235184	1905369621	1142536060	1045240768	1812094504	1998205388	2554454741	2624956640	2298251312	2117347307	0.00053821	0.57204	2.15836	down
V1212	SM 42:2	3.33333e+08	4.50246e+08	8.58043e+08	9.24417e+08	546319079	7.57682e+08	1478968222	1416212912	1289602640	9.4286e+08	1026217456	1172502153	0.0012803	0.52823	1.637	down
V1214	SM 42:2	4807347064	3874316607	4827058347	6562394704	4780116370	4415850780	6509709329	9463970208	10018457687	10072201711	6723005303	7010106181	0.0015292	0.58772	4.08766	down
V1223	PC 38:2	15048024206	13002297615	3654484795	3332592126	6717027477	11804112886	7.22033e+08	630418602	1097420238	9.62905e+08	9.10607e+08	8.04025e+08	0.0028147	10.446	6.02821	up
V1241	PC 38:1	1486143768	1237343987	3.80224e+08	4.80389e+08	6.45097e+08	1071644236	5.01103e+07	5.66143e+07	5.62442e+07	6.92492e+07	4.84045e+07	4.38518e+07	0.0010582	16.337	1.99499	up
V1243	TG 48:4	6.03345e+07	1.54608e+08	1.53168e+08	4.6562e+08	2.5031e+08	1.37937e+08	4.40928e+08	1.54342e+08	6.37195e+08	6.28238e+08	5.62878e+08	3.46467e+08	0.022999	0.44114	1.00081	down
V1252	MePC 37:1	7.82025e+08	6.42165e+08	2.30535e+08	2.36052e+08	3.38666e+08	5.46222e+08	3.00304e+07	2.59417e+07	2.6694e+07	3.89518e+07	2.58688e+07	2.36229e+07	0.00091438	16.222	1.45148	up
V1305	TG 48:2	527364058	5.57215e+08	9.05997e+08	9.21098e+08	4.10316e+08	4.73745e+08	3.5236e+08	3.17354e+08	3.52196e+08	402945044	1.89015e+08	128392057	0.006962	2.1786	1.2618	up
V1312	PC 39:3	6.42921e+08	5.52539e+08	3.96928e+08	4.9241e+08	6.2134e+08	4.18115e+08	7.58499e+07	1.40121e+08	1.60651e+08	1.60898e+08	1.51392e+08	123493958	5.2475e-06	3.8457	1.4504	up
V1342	PC 40:7	1.6033e+08	1.21802e+08	1.48922e+08	2.46099e+08	1.88394e+08	1.25563e+08	4.30019e+08	5.42933e+08	5.26512e+08	413427000	4.3934e+08	2.89522e+08	6.1902e-05	0.37517	1.19217	down
V1347	SM 44:6	2.82657e+08	2.61898e+08	3.90978e+08	5.18761e+08	3.69989e+08	3.10665e+08	4.79609e+08	466991553	6.6841e+08	7.73626e+08	6.31117e+08	5.54297e+08	0.0030182	0.59735	1.04532	down
V1355	PC 38:3	2424641535	2520889057	2257132616	2154036759	2508209347	3208288564	4067561427	3423368187	3147756407	4545580727	4299368838	4069666146	0.00033204	0.63996	2.66977	down
V1358	PC 40:6	2016582193	3131770157	1227408053	1801075788	1976665155	1754275197	3916874778	3402403865	2915099904	2502501874	4367528526	4156202435	0.0027254	0.56009	2.6449	down
V1361	TG 49:2	6.45118e+08	5.93202e+08	7.34001e+08	9.1634e+08	5.57e+08	6.015e+08	353018647	2.97625e+08	4.14626e+08	5.29737e+08	2.60226e+08	191617573	0.0010464	1.9773	1.28725	up
V1369	SM 44:5	7.66553e+07	1.08022e+08	2.6632e+08	1.97277e+08	1.45436e+08	241818360	3.81958e+08	2.64146e+08	2.9799e+08	2.2242e+08	2.07412e+08	1736760248	0.037373	0.33289	1.02639	down
V1380	PC 38:2	2737044014	2631948404	9.56665e+08	7.20178e+08	1531107400	2727797013	2.24493e+08	1.39157e+08	2.75752e+08	248960020	1.92183e+08	171095244	0.0013358	9.0319	2.76384	up
V1381	PC 40:5	723309076	7.79839e+08	1156306278	1406622907	9.15238e+08	7.34503e+08	5.29484e+08	4.47064e+08	6.68886e+08	792639370	6.64537e+08	5.99862e+08	0.021019	1.5438	1.16061	up
V1384	PC 40:5	9.72465e+08	8.3447e+08	1174423714	1522204214	1205572317	7.31763e+08	3.6955e+08	5.40711e+08	6.46311e+08	6.4082e+08	4.9328e+08	3.93915e+08	0.0013184	2.0881	1.65121	up
V1397	PC 40:4	6433085173	5569311050	2102880841	2243420306	3710045642	4867262391	5.45531e+08	5.27388e+08	8.38864e+08	7.66683e+08	6.88694e+08	527848728	0.00070016	6.3995	4.0964	up
V1399	PC 40:4	3.89335e+08	5.78029e+08	2.02179e+08	1.75171e+08	3.38971e+08	6.34451e+08	6.87179e+07	3.48716e+07	6.14454e+07	5.58371e+07	77741843	8.46226e+07	0.001961	6.0488	1.16385	up
V1416	PC 40:3	1182026838	9.19268e+08	310864663	3.22681e+08	5.53348e+08	8.65433e+08	7.71489e+07	6.93027e+07	9.87833e+07	1.11366e+08	5.85578e+07	5.64841e+07	0.0016871	8.8067	1.69478	up
V1417	PC 40:3	9.84412e+08	1338997480	6.94444e+08	8.76497e+08	1123366036	1161145483	2.54321e+08	2.83347e+08	3.02932e+08	3.20877e+08	2.87422e+08	276860602	1.2597e-05	3.5804	1.9495	up
V1418	TG 50:6	1.54781e+08	1.19021e+08	1.58717e+08	2.02722e+08	1.56205e+08	1.06479e+08	3.56099e+08	3.85152e+08	5.21374e+08	4.61529e+08	4.79429e+08	3.24258e+08	1.3611e-05	0.35521	1.20678	down
V1428	MePC 39:3	6.16054e+08	481371500	191537653	2.13208e+08	289174463	4.4668e+08	3.98102e+07	3.53787e+07	5.30644e+07	5.62903e+07	3.61783e+07	2.87697e+07	0.00071091	8.9703	1.27173	up
V1430	MGDG 40:9	4.65438e+08	4.35588e+08	3.04452e+08	3.15026e+08	3.57042e+08	2.36524e+08	1125826734	9.2843e+08	1039182558	1178830971	5.1939e+08	1142108250	0.00013852	0.35628	1.79909	down
V1439	TG 50:5	1.45321e+08	4.09759e+08	774257246	1061864995	1240832378	398876685	1521176441	6.90714e+08	3138670552	3154425349	2945437722	1991284786	0.0057331	0.29988	2.6938	down
V1453	TG 51:11	5.04361e+08	6.12315e+08	1210997811	9.87945e+08	6.87134e+08	1105569462	1639139009	2829697595	2442226140	1947966579	1759162555	1016921630	0.003389	0.43904	2.29059	down
V1455	TG 50:4	2.40727e+07	7.22429e+07	1.44857e+08	198024770	2.20052e+08	1.07076e+08	2.71818e+08	1.20315e+08	5.71759e+08	5.66873e+08	5.25585e+08	367224030	0.0066521	0.3162	1.12989	down
V1467	PC 41:7	6.31342e+08	5.93078e+08	4.14061e+08	4.41341e+08	6.50299e+08	4.86245e+08	2.33585e+08	266068516	3.16041e+08	3.33059e+08	3.31936e+08	3.05754e+08	0.00032614	1.8004	1.08371	up
V1480	PC 41:6	1603001368	1232903172	6.51892e+08	6.73443e+08	1480172045	1138141602	3.76044e+08	528484892	6.42715e+08	6.30081e+08	6.47263e+08	472589635	0.0063577	2.0562	1.54049	up
V1482	TG 50:2	2.88392e+08	3.38633e+08	5.03972e+08	5.32084e+08	3.65008e+08	3.73097e+08	1108070472	2.58993e+08	1185997934	1199451236	8.51427e+08	6.75296e+08	0.011426	0.45484	1.39611	down
V1486	PG O-43:7	4.22705e+08	5.4537e+08	1196338569	8.70529e+08	6.59106e+08	1053782234	1506951389	2070238552	1973418844	1641815943	1455255338	962969836	0.0026465	0.49402	1.98994	down
V1572	PC 40:4	1162718802	1119397512	538911090	5.33232e+08	876924395	1120876582	1.21306e+08	8.45059e+07	1.69714e+08	1.68229e+08	1.32758e+08	1.11036e+08	8.8331e-05	6.7958	1.94606	up
V1577	TG O-52:3	239448257	4.06288e+08	3.99518e+08	4.41552e+08	4.89116e+08	4.321e+08	100813638	1.56933e+08	1.46131e+08	1.35306e+08	1.15361e+08	1.03359e+08	1.8255e-05	3.1772	1.18853	up
V1588	PC 40:3	4.55774e+08	4.2516e+08	2.33503e+08	2.42215e+08	3.35031e+08	391281332	7.57307e+07	6.20121e+07	8.8187e+07	9.32182e+07	7.49844e+07	7.16294e+07	3.7412e-05	4.4722	1.17952	up
V1589	PC 42:6	5148475453	4423336463	1003448751	9.06537e+08	2903216412	3739976575	2.38118e+08	2.02112e+08	3.71995e+08	3.4535e+08	2.53246e+08	2.75604e+08	0.0034799	10.748	3.46549	up
V1594	TG O-52:2	2.69546e+08	4.87573e+08	4.47167e+08	5.10843e+08	4.9094e+08	5.04231e+08	7.25745e+07	1.45912e+08	1.0754e+08	9.42019e+07	7.57593e+07	7.75304e+07	0.00394775	4.7257	1.36484	up
V1627	TG 52:7	8.62401e+07	2.77217e+08	1.03544e+08	1.47949e+08	6.4658e+08	6.73556e+08	2098892867	7.23477e+08	1687850784	2169711206	1977838682	2148784804	0.00394775	0.17907	2.77315	down
V1628	TG 52:7	4.5798e+07	3.05877e+08	9.71462e+07	1.68095e+08	1.20877e+08	1.1593e+08	2.55482e+08	3.85626e+08	7.89444e+08	9.19077e+08	1274671409	3.59243e+08	0.010611	0.21431	1.50331	down
V1639	TG O-52:2	200013215	3.07848e+08	2.80209e+08	3.08284e+08	3.10213e+08	2.94102e+08	6.9047e+07	1.07618e+08	9.31674e+07	7.91137e+07	7.13772e+07	7.8418e+07	0.00394775	3.4099	1.03756	up
V1643	TG 52:6	3.7172e+08	8.24244e+08	1287374432	1999563405	2420315929	9.73335e+08	4138530699	1312309559	5128025012	5178883590	9277397955	7723115751	0.0055906	0.24044	4.59821	down
V1657	TG 52:5	6191401014	10444410202	9871256461	12611020930	19777899581	10670584206	16550813038	24919672341	26846766727	27664987063	24843315781	22585799902	0.00054938	0.48508	8.06994	down
V1660	PG O-44:3	1.50985e+08	3.26429e+08	1.12927e+08	1.22791e+08	3.39992e+08	366493338	7.93883e+08	3.24158e+08	7.85945e+08	8.72239e+08	4.41189e+08	6.37481e+08	0.0025313	0.36826	1.39377	down
V1668	TG 52:6	1.51965e+08	2.5856e+08	5.6805e+08	7.12284e+08	6.96787e+08	4.34622e+08	8.2112e+08	4.14059e+08	7.73728e+08	1250690139	1064630621	991310079	0.020294	0.53095	1.32742	down
V1676	TG 52:3	1.71194e+08	2.98046e+08	3.09057e+08	1910802959	3.98266e+08	3.31797e+08	6.69504e+08	3544609989	3358075603	600236586	5.29075e+08	4.9592e+08	0.0249747	0.37175	1.63325	down
V1680	d5-TG 52:5	2.80446e+08	4.12822e+08	4.28587e+08	1.34501e+08	6.20737e+08	5.45235e+08	9.50597e+08	1.47336e+08	929717594	7.8993e+08	9.00538e+08	8.29916e+08	0.037373	0.53261	1.18735	down
V1697	TG 52:1	3603059397	3890704147	3711931674	3857701792	3380563195	4626624121	2765995368	3601665854	2655232351	2573352722	1988212284	1568698410	0.0027207	1.5225	2.5025	up
V1704	TG 52:3	5.99868e+07	2.64284e+08	1.97017e+08	2.31892e+08	3.5269e+08	281410122	6.7372e+08	5.97049e+08	7.02457e+08	5.88688e+08	5.80556e+08	608067627	5.6491e-06	0.36989	1.4842	down
V1705	TG 54:6	208996667	2.12597e+08	1.77227e+08	1.91563e+08	2.69803e+08	2.41917e+08	3.85203e+08	6.35086e+08	3.8038e+08	3.96678e+08	8.01514e+08	9.80007e+08	0.0046032	0.36383	1.37018	down
V1712	d5-TG 52:5	1.05496e+08	1.41467e+08	9.58057e+07	1.08089e+08	1.56798e+08	1.44288e+08	2.81324e+08	2.60747e+08	4.53322e+08	2.82451e+08	2.90724e+08	4.18547e+08	0.00394775	0.37841	1.05185	down
V1735	PC 42:6	8.93961e+08	7.97441e+08	2.06893e+08	1.47934e+08	6.69433e+08	935685133	3.81612e+07	2.33733e+07	4.6668e+07	6.49937e+07	4.92723e+07	5.61246e+07	0.0026567	13.106	1.54373	up
V1738	TG 53:5	4.88104e+08	5.52558e+08	4.62159e+08	4.96564e+08	9.73219e+08	5.84389e+08	9.01403e+08	8.63171e+08	9.66191e+08	1091436551	1345435990	1197030119	0.0163092	0.55887	1.59647	down
V1743	SM 48:8	4.05253e+08	4.88688e+08	7.71287e+08	5.58634e+08	4.38137e+08	9.67857e+08	1060595958	1357595219	1448260133	1186713707	911339674	7.12999e+08	0.0055156	0.54359	1.61193	down
V1750	TG 53:4	1179933998	1296131595	1170595859	1448267934	2133709968	1240175269	1693885678	2098297035	1794405845	2568820456	2424060375	2523807824	0.0163092	0.64631	1.9579	down
V1751	TG O-54:4	2.2678e+08	3.61694e+08	3.86476e+08	4.76634e+08	4.19051e+08	3.7881e+08	1.00696e+08	1.37241e+08	1.71459e+08	1.5097e+08	8.26454e+07	1.10944e+08	4.652e-05	2.9835	1.12248	up
V1776	TG 54:9	6.27402e+07	1.88303e+08	1.06276e+08	1.61414e+08	270269936	2.43079e+08	6.16103e+08	1.96824e+08	9.95518e+08	9.40277e+08	1280858959	6.84735e+08	0.0028031	0.21892	1.72875	down
V1792	TG 54:8	9.9481e+08	2306061938	1738605822	2334054562	4218876695	3020890233	6322043189	3036490115	10659056421	7805952714	2433782456	6587845382	0.019117	0.39661	3.93407	down
V1794	TG 54:8	2.40914e+08	5.1118e+08	2.80345e+08	3.74696e+08	9.19643e+08	7.28715e+08	3359000680	8.61493e+08	3060360979	2494502693	9608585669	1983680511	0.00648531	0.143	3.51907	down
V1805	TG 54:7	9.05264e+08	1585272303	9.91852e+08	1613368392	2871332830	1751474069	4536128975	4512067873	8256476721	9154049599	9878371912	8111754955	0.00016422	0.21865	5.59295	down
V1806	TG 54:7	6929322910	10792763036	3593869124	4835433683	12702035010	11688880636	19130211652	13401549738	22117933420	18145569333	19279314907	17187372062	0.00052901	0.46258	7.14389	down
V1813	TG 54:6	6575845661	6048867287	5094907598	8789531003	7621286932	5175391748	6993695508	11262499336	9098532384	10577799085	13970536611	12165284179	0.0050212	0.6135	4.45588	down
V1815	TG 54:8	1.54478e+08	4.93689e+08	1.40035e+08	1.63862e+08	3.39527e+08	2.49318e+08	1662343819	8.87677e+08	1354636880	1647238320	1525161988	1353710069	4.9334e-06	0.18277	2.48346	down
V1817	TG 56:11	7.35299e+06	4.30502e+07	6.20003e+07	2.91316e+07	8.5976e+07	1.71615e+08	3.94255e+08	5.85626e+07	315512081	4.28291e+08	664011097	6.86049e+08	0.0045045	0.15672	1.31602	down
V1818	d5-TG 54:8	3639877886	3464303562	2549896074	4515552595	4834703272	3152960832	4237395037	6763072444	5109144777	6166253531	8454070094	7560435688	0.0040169	0.57866	3.67693	down
V1823	TG 54:5	12173985742	12255008217	12105087664	14631150526	15277566199	11842051017	16118693979	25323750549	18864845583	18671185598	24340785221	23825695110	0.00394775	0.61571	6.476	down
V1824	TG 54:5	5.18158e+07	1.35051e+08	1.23491e+08	1.90128e+08	1.6771e+08	1.66394e+08	2.67982e+08	3.21406e+08	3.21602e+08	3.54981e+08	421347352	7.39062e+08	0.00394775	0.34396	1.14518	down
V1828	TG 54:7	3.6471e+08	4.63181e+08	4.12194e+08	4.82652e+08	6.74054e+08	5.28793e+08	775937222	7.5955e+08	7.77818e+08	1394576637	1068583309	1166173169	0.0014663	0.4923	1.56488	down
V1840	TG 54:4	7.21447e+07	8.84904e+07	7.30829e+08	8.94679e+08	8.10611e+08	5.40123e+08	1539651341	1947617258	1457466605	1804259394	3.69406e+08	1813415202	0.0249747	0.3512	2.03801	down
V1841	TG 54:4	15298053782	18767826770	20537252270	22847820177	21002713883	16406795157	26682876013	36029177756	30844520375	30532565276	30534838984	28068740715	7.5235e-05	0.62871	7.63634	down
V1847	d5-TG 54:6	3.36597e+07	3.56946e+07	4.91165e+08	2.42546e+08	9.53732e+07	1.84497e+08	9.82742e+08	1365793914	8.75218e+08	1067393009	1254273343	1250775229	3.6337e-06	0.15934	2.2608	down
V1864	TG 54:2	6763283423	8130089361	9740813952	10706252852	7562670734	8715422071	4038375589	6553575072	3790605714	4050293389	3028556796	3068495012	0.00394775	2.1043	4.77511	up
V1873	TG 55:8	3.58824e+07	1.08125e+08	6.23868e+07	8.55849e+07	8.07383e+07	1.19916e+08	2.99257e+08	210878512	401403041	3.8837e+08	4.20027e+08	3.06504e+08	2.5399e-05	0.2431	1.18383	down
V1875	TG 54:1	9.27128e+08	1250217451	4.73942e+08	4.11771e+08	6.2447e+08	1259397150	8.00912e+07	1.51221e+08	8.61245e+07	8.90707e+07	7.25263e+07	5.88184e+07	0.00078527	9.1976	1.83421	up
V1887	TG 55:7	4.53405e+08	5.16817e+08	3.03273e+08	3.55803e+08	4.50319e+08	477430293	6.49774e+08	7.06855e+08	8.31483e+08	9.05306e+08	6.91156e+08	5.65602e+08	0.00056433	0.5878	1.25534	down
V1901	TG 54:1	514932556	6.13287e+08	2.54475e+08	257931481	3.35714e+08	5.83197e+08	7.22011e+07	9.15335e+07	7.07169e+07	6.80444e+07	5.88765e+07	5.25961e+07	0.0003271	6.1829	1.31254	up
V1907	TG 55:5	3.05043e+08	3.76069e+08	1.52551e+08	145597988	206208261	363944839	3.63372e+07	4.86282e+07	3.94796e+07	3.47346e+07	3.80424e+07	2.63401e+07	0.0003985	6.9306	1.02324	up
V1921	d5-TG 55:6	3.7554e+07	2.07165e+08	1.96195e+08	1.98771e+08	2.75464e+08	2.41178e+08	8.98151e+08	4.67453e+08	7.10381e+08	5.00175e+08	7.83696e+08	6.54964e+08	8.6297e-05	0.28801	1.57504	down
V1922	d5-TG 55:6	3.38472e+08	3.478e+08	2.58997e+08	4.77426e+08	7.24995e+08	2.77966e+08	6.655e+08	8.19637e+08	6.16156e+08	7.0642e+08	8.94393e+08	1128411733	0.0033787	0.50215	1.44097	down
V1926	TG 56:10	3.80226e+07	6.94624e+07	3.17312e+07	4.4137e+07	1.38969e+08	1.96708e+08	4.88414e+08	1.3682e+08	4.79676e+08	4.44956e+08	1522827027	9.19018e+08	0.01652	0.13003	1.66256	down
V1927	TG 56:10	302432259	5.85897e+08	2.29801e+08	2.95395e+08	8.87891e+08	3.2733e+08	1124858367	6.87986e+08	2947412992	1824366510	2805903429	2090854690	0.0030792	0.22896	2.72821	down
V1928	TG 55:3	4.22717e+08	5.09809e+08	766337349	8.67766e+08	7.71513e+08	5.60622e+08	3.36672e+08	4.83983e+08	3.3838e+08	4.41299e+08	3.93463e+08	3.38263e+08	0.0065251	1.6718	1.08021	up
V1937	TG 56:9	2756441102	5785861039	3908896842	5141174618	10810842177	6683246267	13634553177	9380554089	20179134371	16090542659	14484081469	13422620375	0.00083061	0.40241	6.70387	down
V1938	PG O-46:2	3.58497e+08	6.35175e+08	4.75491e+08	7.68968e+08	1340813871	9.32869e+08	1475925095	1201716091	2278148812	1855956551	2613555456	8403890137	0.00648531	0.25306	3.02812	down
V1946	TG 56:8	15961997147	23424172145	15637736699	19043447353	29872052840	23546269098	28324911092	30705772712	38399094112	33587431579	36961744168	35164230631	0.00091754	0.62757	8.31438	down
V1960	TG 56:9	2.68154e+08	186339160	1.1213e+08	1.1932e+08	3.20578e+08	2.16874e+08	9.49287e+08	5.99042e+08	4.70083e+08	8.2719e+08	1480589088	1557868309	0.0019596	0.20792	1.94608	down
V1969	TG 56:6	1014861653	1074899220	1201334903	1521279543	1214843713	1122820495	1622625322	2142184660	1713038261	1575013484	2127219357	2028082601	0.00037074	0.63793	1.85898	down
V1976	d5-TG 56:8	5.33429e+08	5.58336e+08	6.10999e+08	644043070	6.18775e+08	5.92078e+08	7.81165e+08	1064823912	800017753	7.00514e+08	1049155963	9.82604e+08	0.00092501	0.66149	1.23454	down
V1983	TG 56:7	1640407088	1817310984	1634643239	1858189198	1728977800	1748488372	1265499206	1259498958	1713535886	6.86282e+08	5.19943e+08	5.33068e+08	0.0044205	1.7444	1.80279	up
V1985	TG 56:7	366775789	4.33017e+08	2.81917e+08	3.23801e+08	3.28208e+08	3.38799e+08	1239725866	1232557478	1679767300	1249546727	1012807237	1005790705	5.4543e-06	0.27931	2.22908	down
V1987	TG 56:4	3532568393	4583507026	5243721809	5941378782	5690832927	4499109844	2340683157	3602613169	2837251585	3186782537	3099775022	3103027113	0.00083996	1.6231	3.04934	up
V2002	TG 56:3	2817767794	3802532474	5305586522	5865408327	4016604366	3918371203	7.80855e+08	1444087529	8.82507e+08	1047292853	7.46722e+08	8.04295e+08	2.9989e-05	4.5088	4.19715	up
V2016	TG 57:9	4.86554e+07	7.3714e+07	4.07927e+07	60476583	1.17955e+08	8.85098e+07	1.95786e+08	2.22007e+08	2.61448e+08	2.83915e+08	4.06956e+08	3.51577e+08	9.7421e-05	0.24981	1.09388	down
V2019	TG 56:2	1100361352	1532952278	8.49909e+08	8.48027e+08	8.98756e+08	1610732981	6.224e+07	1.15176e+08	8.22487e+07	8.92522e+07	5.43425e+07	5.88472e+07	2.139e-05	14.803	2.31929	up
V2021	TG 56:4	8.94818e+08	1037198340	9.90454e+08	1023099840	1104055910	9.73834e+08	5.19057e+08	6.22332e+08	6.57832e+08	6.49517e+08	7.21163e+08	7.37667e+08	9.2699e-06	1.5415	1.38353	up
V2026	TG 57:8	1.50632e+08	1.8729e+08	1.53256e+08	1.88703e+08	1.94882e+08	1.53264e+08	3.16553e+08	4.01971e+08	3.83506e+08	4.36551e+08	4.16493e+08	3.40728e+08	0.00394775	0.44779	1.08257	down
V2032	MePC 46:5	4.34942e+07	6.18309e+07	1.17163e+08	6.45006e+07	8.09611e+07	1.03243e+08	2.16993e+08	2.86114e+08	246112734	2.28047e+08	4.25913e+08	280904351	0.00011583	0.27979	1.04003	down
V2033	TG 56:3	9.65206e+08	1091349184	1329916529	1450538106	1138332754	1068264903	3.1205e+08	4.56756e+08	3.5055e+08	4.3659e+08	334338142	3.6872e+08	1.229e-06	3.118	2.09863	up
V2039	TG 56:2	6.15957e+08	7.57421e+08	4.61681e+08	4.74909e+08	4.9585e+08	7.57327e+08	4.20102e+07	6.76285e+07	5.09466e+07	54186719	3.76779e+07	3.64643e+07	2.197e-06	12.333	1.69993	up
V2053	TG 57:5	2.21609e+08	3.71864e+08	3.71169e+08	4.10735e+08	7.03085e+08	3.61559e+08	8.49219e+08	7.14645e+08	6.62553e+08	6.78805e+08	8.34874e+08	7.7448e+08	0.00076716	0.54048	1.34185	down
V2057	TG 58:11	2.31446e+08	3.7103e+08	1.54228e+08	1.85067e+08	3.93759e+08	5.0958e+08	1369506802	8.1908e+08	1816762351	1771958348	2419607512	1732765367	0.00013016	0.18582	2.68714	down
V2058	TG 58:11	314151497	5.05068e+08	1.67807e+08	2.21296e+08	1614984435	4.82076e+08	1228439786	9.67313e+08	3479218247	2192591112	6036900612	6879489975	0.0104056	0.15904	3.88686	down
V2059	TG 58:11	2.18771e+08	3.66476e+08	3.59691e+08	4.8842e+08	5.77617e+08	7.72821e+08	9.47405e+08	8.30944e+08	1629123698	1101798328	1855898093	1192903368	0.0013868	0.36832	2.05363	down
V2065	TG 58:10	1816546674	3146087755	2123627926	2820040514	7387792527	3450789930	8550952417	9186156713	12475291172	10116324734	18144990592	19650810559	0.00394775	0.26554	7.29512	down
V2066	TG 58:10	5.7136e+07	93385911	4.54824e+07	6.24473e+07	3.32888e+08	1.24494e+08	6.36184e+08	1.67996e+08	1239770947	9.00955e+08	1826762010	1311073224	0.00648531	0.11768	2.1362	down
V2072	PG O-50:8	8.71683e+07	1.11593e+08	1.99745e+07	2.01441e+07	157111204	1.09293e+08	2.79726e+08	7.42121e+07	3.96639e+08	5.40518e+08	6.03185e+08	4.32447e+08	0.0037917	0.21716	1.19913	down
V2073	d5-TG 58:12	2.73629e+07	4.58026e+07	2.38719e+07	3.27477e+07	1.81405e+08	5.67091e+07	2.81344e+08	1.32707e+08	5.32624e+08	4.23532e+08	8.40395e+08	544962815	0.00648531	0.13351	1.43502	down
V2074	TG 57:5	1.61938e+07	3.0036e+07	1.62021e+08	2.37291e+07	9.5054e+07	2.08096e+08	2.85933e+08	3.2239e+08	3.41623e+08	3.14454e+08	5.2558e+08	2.95319e+08	0.00394775	0.25662	1.16551	down
V2075	TG 59:8	1.73882e+07	3.20187e+07	1.62558e+08	2.62589e+07	9.56825e+07	2.09472e+08	2.88473e+08	3.24273e+08	3.44034e+08	317515946	5.31387e+08	2.98475e+08	0.00394775	0.25824	1.16963	down
V2077	TG 58:9	5.49169e+08	8.93381e+08	7.50392e+08	9.52275e+08	1517801223	9.18822e+08	1429254179	1570419237	2452782533	1772846775	3577992357	3044724742	0.0045571	0.40308	2.76179	down
V2078	TG 58:9	3692634236	5647151595	6044830586	7891897932	10272419949	5532317323	11732274243	15362819670	15603500325	13604097637	18091943719	17893777106	7.0312e-05	0.42347	7.09576	down
V2081	TG 58:11	2.50793e+08	2.94742e+08	6.80651e+07	1.17359e+08	1.85618e+08	1.96245e+08	3.68597e+08	3.40024e+08	5.31463e+08	5.62701e+08	3.22451e+08	3.72753e+08	0.0016716	0.44549	1.07885	down
V2083	TG 58:11	22677918	1.87718e+08	1.17172e+08	1.15393e+08	8.06929e+08	3.07381e+08	5.60724e+08	2.19793e+08	8.35367e+08	7.16369e+08	1744177240	1889743511	0.0249747	0.26102	1.99718	down
V2086	d5-TG 58:11	3.97708e+08	6.24961e+08	4.7804e+08	5.90188e+08	1003539155	5.99949e+08	8.45936e+08	9.17056e+08	1374627625	1135366096	2411357933	1907081626	0.011583	0.43001	2.10433	down
V2088	TG 58:8	2813914387	3835446354	5169763611	6598314966	5620947787	3490927436	6514008009	9424998169	9562831671	7419708525	8412751415	9320333524	0.00057078	0.54347	4.45211	down
V2091	PG O-48:1	1555168864	1782710512	1588116808	1801686278	2158527093	1465947070	1885799054	2773001151	2775198783	2389193583	4512383089	3800497471	0.0096105	0.5708	2.61033	down
V2096	TG 58:10	8.33825e+08	1139862446	7.80194e+08	9.535e+08	1994451417	1145125350	1907403881	2006276932	2168923369	1957211632	2703402577	3170356123	0.0104056	0.49211	2.5602	down
V2103	TG 58:7	7.99291e+07	1.15228e+08	1.35597e+08	1.3466e+08	719110156	1.53408e+08	7.67971e+08	3.00833e+08	1103609127	204520269	1012300186	9.77648e+08	0.0104056	0.30638	1.60243	down
V2106	TG 58:9	8.88873e+08	1075441370	1265031843	1472981759	1660207098	1033200992	1690895599	1957099514	1980129668	1681516743	1931507061	2163349311	0.00079079	0.64849	1.89522	down
V2128	TG 58:4	6.95837e+08	9.93215e+08	8.46328e+08	9.3881e+08	1100564705	1023013651	1.01757e+08	1.76305e+08	1.32837e+08	1.40762e+08	1.09175e+08	1.18877e+08	1.0053e-07	7.1793	2.09041	up
V2139	TG 58:3	4.49072e+08	6.21027e+08	4.72934e+08	5.08059e+08	4.7737e+08	6.90656e+08	3.28492e+07	5.77945e+07	4.01016e+07	3.99379e+07	2.70917e+07	2.99678e+07	1.9461e-07	14.135	1.63353	up
V2141	TG 58:5	3.58209e+08	399412588	4.18213e+08	4.41007e+08	3.79225e+08	4.13377e+08	1.62107e+08	1.8566e+08	1.94179e+08	1.77068e+08	1.4891e+08	1.694e+08	1.3148e-08	2.3227	1.12645	up
V2147	TG 58:4	298690032	3.47062e+08	2.72456e+08	281667966	3.57086e+08	3.4473e+08	4.5483e+07	5.87135e+07	5.78764e+07	6.29587e+07	5.20548e+07	5.10975e+07	9.8035e-09	5.7946	1.20163	up
V2154	TG 58:3	274220642	3.4403e+08	2.68833e+08	2.98427e+08	2.78659e+08	3.72109e+08	1.98437e+07	2.72016e+07	1.89601e+07	2.78397e+07	1.79667e+07	2.11705e+07	1.5734e-08	13.808	1.24623	up
V2158	TG 60:13	2.23628e+08	4.58777e+08	8.40856e+07	1.3588e+08	6.9214e+08	2.94278e+08	1359851840	7.95097e+08	3036073752	2399194729	4297919000	3034056703	0.002027	0.12658	3.34494	down
V2159	TG 60:13	3.5966e+07	6.42086e+07	1.19176e+08	1.63812e+08	3.1263e+08	1.41009e+08	218964655	1.27621e+08	4.94695e+08	2.69084e+08	4.65796e+08	4.65588e+08	0.022848	0.40985	1.03583	down
V2165	PG O-50:5	6.90334e+07	1.17326e+08	2.94504e+07	3.7556e+07	2.57448e+08	1.34827e+08	4.32628e+08	2.55335e+08	8.61481e+08	553016192	1453699318	9.79795e+08	0.0049537	0.14234	1.83018	down
V2166	TG 60:12	3.9594e+08	7.34795e+08	7.46706e+08	9.40633e+08	1236991316	1113137165	1503280140	2420973002	2939365435	1845914381	2963620599	2866595561	0.00025016	0.35545	2.965	down
V2167	TG 60:12	3.91776e+08	5.47726e+08	4.68659e+08	6.22534e+08	1242097359	6.30392e+08	1571432868	1342470084	1959114854	1791040797	2961293626	2740230787	0.00394775	0.31565	2.80148	down
V2168	TG 59:5	4.24732e+08	418904471	4.3391e+08	4.90368e+08	5.12575e+08	4.26646e+08	5.75411e+08	7.52897e+08	6.361e+08	6.18249e+08	7.95755e+08	806535214	0.00394775	0.64687	1.15269	down
V2173	TG 60:11	175876162	2.92318e+08	2.43699e+08	3.10938e+08	2077586171	5.20269e+08	2270987762	1319468455	1711497992	1299472903	4789537826	4570227439	0.0163092	0.22684	3.33251	down
V2176	TG 60:13	1.09776e+08	7.92051e+07	5.12688e+07	4.80825e+07	3.9233e+08	1.51787e+08	6.20165e+08	2.26718e+08	3.45989e+08	5.50716e+08	1006539510	1059379846	0.0104056	0.21852	1.57103	down
V2181	TG 60:10	4.81062e+08	6.34098e+08	7.2336e+08	8.89505e+08	8.35924e+08	5.82388e+08	806363624	1049388684	1086856050	8.6547e+08	1390360334	1305375691	0.0062427	0.63752	1.4575	down
V2189	TG 60:9	1.41031e+08	7.29913e+07	2.25499e+08	2.43187e+08	2.57639e+08	1.86995e+08	2.52143e+08	3.34635e+08	3.52846e+08	3.12946e+08	4.93036e+08	5.53709e+08	0.0053441	0.49029	1.01791	down
V2192	TG 60:9	8.44068e+07	1.10621e+08	1.14758e+08	1.60932e+08	1.72019e+08	1.25429e+08	5.38416e+08	7.55125e+08	2.27486e+08	6.83048e+08	9.84234e+08	1031722201	0.00083738	0.18203	1.67776	down
V2195	TG 60:11	7.65947e+07	3.97946e+08	1.32093e+08	8.93103e+07	473938813	1.69333e+08	4.57804e+08	5.08357e+08	5.63975e+08	2.58206e+08	690582125	7.35723e+08	0.010077	0.4166	1.27333	down
V2201	TG 60:8	1.00447e+08	2.34561e+08	2.34061e+08	3.71635e+08	3.58407e+08	3.26298e+08	256105867	4.18409e+08	3.54064e+08	3.86828e+08	6.7479e+08	6.60796e+08	0.04397	0.59084	1.00401	down
V2203	TG 60:8	5.34099e+08	5.61777e+08	5.99487e+08	6.94846e+08	8.467e+08	693640119	3.19148e+08	387269808	4.78943e+08	4.28248e+08	3.9464e+08	4.2481e+08	0.00070139	1.6155	1.09044	up
V2214	TG 60:7	2.09984e+08	2.60515e+08	1.77843e+08	2.07734e+08	3.1453e+08	4.18184e+08	2.86994e+07	5.10706e+07	5.00721e+07	4.59875e+07	4.77962e+07	5.30566e+07	0.00394775	5.7423	1.00654	up
V2225	TG 60:6	3.31125e+08	3.9417e+08	4.40458e+08	5.2229e+08	426624086	449440140	9.73539e+07	1.67562e+08	1.26302e+08	1.28912e+08	1.10027e+08	1.05211e+08	6.8282e-07	3.4868	1.28479	up
V2264	TG 62:14	2.34793e+08	4.65915e+08	2.66244e+08	3.4553e+08	1760028531	5.10675e+08	1760925107	1385764044	3485284955	2411350588	5827904809	6167819858	0.00648531	0.17031	3.94625	down
V2269	TG 62:13	2.35386e+08	4.38071e+08	4.33153e+08	5.96842e+08	1232022747	4.33269e+08	1087985283	1410903222	1925919429	1360567743	1993399358	2172504750	0.00648531	0.33852	2.49242	down
V2270	TG 62:13	1.04736e+08	2.06591e+08	100995920	1.41987e+08	5.05613e+08	1.90915e+08	5.15337e+08	4.35154e+08	1076946626	7.18553e+08	1820326892	1417479226	0.00648531	0.20904	2.05254	down
V2277	TG 62:14	136883399	284249479	1.39181e+08	2.04912e+08	9.08738e+08	251606591	616175132	5.42979e+08	1046182718	7.98973e+08	1384375934	1644342233	0.0163092	0.31917	1.9464	down
V2401	FA 17:1	2078718776	1761734390	1815486236	2284827479	3146835746	1021327159	1340925367	1126371578	1115087802	1021701550	1659297310	1263376849	0.029331	1.6088	1.97972	up
V2421	FA 19:1	8.69167e+08	7.45703e+08	1013628953	1250314326	1720642254	3.63626e+08	4.65146e+08	5.9224e+08	3.71102e+08	3.11e+08	7.64794e+08	6.38014e+08	0.041721	1.8977	1.58414	up
V2424	FA 19:0	6.99873e+08	5.86149e+08	452671154	5.36013e+08	1484454947	3.51543e+08	1.71093e+08	2.1643e+08	152642214	1.42772e+08	3.18642e+08	2.41892e+08	0.00394775	3.3058	1.51456	up
V2429	FA 20:3	24933471530	23249381403	28280434858	35118085454	29355715199	13610975003	15628041466	17236094646	13455301893	10779169147	20260373502	17942489026	0.012685	1.6217	7.07877	up
V2430	FA 20:3	2691673035	2865197684	5501672411	7291690195	4175105524	1437729073	2198407508	2022414440	1700687660	1350710308	2007494126	1845742838	0.035054	2.1539	3.00069	up
V2431	FA 20:2	6114741256	5550224973	6380436507	7894883794	9052059551	2914201397	3529165900	3857982537	2672427269	2095452971	5425165219	4944740498	0.028976	1.6829	3.7555	up
V2432	FA 20:2	9.06678e+08	1009049809	1250778156	1373926300	1299245306	4.76244e+08	6.11537e+08	5.96747e+08	3.62353e+08	2.77565e+08	7.82678e+08	670418788	0.0096035	1.9132	1.62885	up
V2435	FA 20:0	2485429331	2089809231	7.32757e+08	6.93267e+08	2208003566	1135121790	1.81e+08	2.3602e+08	1.9688e+08	1.67595e+08	325750982	2.39523e+08	0.0021864	6.9384	2.48443	up
V2454	FA 22:3	4.16925e+08	3.66875e+08	2.70537e+08	3.0887e+08	4.76175e+08	1.70679e+08	5.9148e+07	8.56917e+07	5.1843e+07	4.07648e+07	1.14137e+08	125409992	0.00027409	4.214	1.17647	up
V2458	FA 22:2	6.82156e+08	568979808	3.59299e+08	2.96832e+08	7.43486e+08	2.90515e+08	8.44979e+07	114579034	6.42115e+07	5.20383e+07	1.37727e+08	1.21043e+08	0.00078612	5.1233	1.41135	up
V2462	FA 22:1	2677751580	2228621375	1306266940	1389224389	2545169438	1097230802	2.05151e+08	268680101	1.7853e+08	1.43742e+08	3.05366e+08	2.6078e+08	0.0001681	8.2542	2.94372	up
V2465	FA 22:0	1567999141	1120490969	3.4242e+08	276205307	9.34571e+08	6.0778e+08	1.0986e+08	133410191	1.01294e+08	9.46992e+07	1.38901e+08	1.20872e+08	0.006627	6.9374	1.74044	up
V2473	FA 24:6	3863885498	3973495837	3258580441	4256073723	5993680273	1798804288	1441240512	2050966391	1487562283	1104599551	2925852287	2290804693	0.0098491	2.048	3.24953	up
V2483	FA 24:1	1300927621	1011999165	9.10014e+08	984655264	1281349513	6.25174e+08	4.44445e+08	574368800	4.25189e+08	3.23855e+08	5.57614e+08	5.25387e+08	0.00057762	2.1447	1.70011	up
V2487	FA 24:0	1191413438	7.3369e+08	3.09552e+08	3.10219e+08	6.0199e+08	4.874e+08	1.72977e+08	2.12171e+08	1.58457e+08	1.47811e+08	1.84023e+08	1.77886e+08	0.009917	3.4503	1.36754	up
V2497	ST 24:1+O4	3.54942e+08	3.76553e+08	3.84736e+08	4.82435e+08	5.75368e+08	1.97746e+08	146661451	1.86864e+08	9.82829e+07	8.22635e+07	1.88266e+08	1.8692e+08	0.0012391	2.6671	1.1635	up
V2523	LPI O-10:0	3.92831e+08	333883620	1.63118e+08	2.55407e+08	2.51029e+08	2.25092e+08	7.59918e+08	639850921	7.3128e+08	8.99175e+08	5.89405e+08	6.49942e+08	1.3977e-05	0.37975	1.54113	down
V2687	Cer 37:1	7.32788e+08	6.62997e+08	3.48365e+08	4.21274e+08	3.60936e+08	3.99223e+08	9.6237e+08	1058817710	7.6341e+08	535517921	893211171	1043389598	0.0043212	0.55654	1.25591	down
V2737	Cer 40:2	5.83486e+08	6.85549e+08	7.21303e+08	8.36056e+08	1010572685	4.45698e+08	2.03887e+08	1.73348e+08	1.69691e+08	1.78647e+08	1.84636e+08	2.00694e+08	6.249e-05	3.8551	1.71144	up
V2739	Cer 40:2	1033459237	1021950359	3.54555e+08	3.83859e+08	7.44657e+08	7.59742e+08	2.26091e+08	1.93272e+08	2.56352e+08	2.04382e+08	2.65689e+08	1.94143e+08	0.0022976	3.2078	1.48561	up
V2741	Cer 40:1	6.85366e+08	680215240	1.84533e+08	1.83337e+08	4.03341e+08	5.53407e+08	121632482	1.12352e+08	1.32065e+08	1.1991e+08	1.11045e+08	1.46334e+08	0.006115	3.6191	1.16754	up
V2742	Cer 39:1	5.98442e+08	5.29115e+08	1.58703e+08	1.6492e+08	3.57734e+08	3.51508e+08	7.42698e+07	7.05203e+07	9.22023e+07	7.54664e+07	8.41399e+07	9.00179e+07	0.0036785	4.4397	1.11465	up
V2751	Cer 40:3	3.32279e+08	3.27539e+08	3.41172e+08	4.14055e+08	4.63059e+08	2.21462e+08	143543175	1.21047e+08	1.24255e+08	1.22863e+08	1.76905e+08	1.6809e+08	0.00015669	2.4507	1.07987	up
V2752	Cer 40:2	2698494217	2579405178	8.98601e+08	9.81598e+08	2169759994	1814190084	5.42873e+08	4.68696e+08	6.0578e+08	456889429	6.83479e+08	4.74316e+08	0.0020417	3.4474	2.4406	up
V2753	Cer 41:2	2.06666e+08	9.24958e+08	1021017692	1129832652	1030414865	6.36404e+08	4.19374e+08	1.0455e+08	1.36714e+08	4.25689e+08	4.86827e+08	4.95388e+08	0.0249747	2.3926	1.48904	up
V2755	Cer 41:2	1517848215	1808499870	1906169258	2283017760	2650255810	1055259375	4.56555e+08	445402336	4.03698e+08	4.5122e+08	4.62117e+08	4.70162e+08	0.00010066	4.1727	2.79915	up
V2757	Cer 41:2	8.66317e+08	870647171	9.70436e+08	1065350080	9.81893e+08	5.99036e+08	3.97906e+08	3.71272e+08	4.81301e+08	4.02438e+08	4.58239e+08	4.663e+08	5.0785e-05	2.0771	1.60337	up
V2781	Cer 41:3	1117194085	9.96716e+08	1159312369	1349125522	1234858477	5.70718e+08	4.82937e+08	4.85949e+08	6.06792e+08	4.6942e+08	5.72757e+08	587993624	0.00081948	2.0051	1.69029	up
V2782	Cer 42:2	9.29354e+08	1009879813	6.93063e+08	7.87836e+08	767290550	7.69979e+08	479289200	3.97348e+08	4.64432e+08	4.22177e+08	5.68362e+08	4.65899e+08	5.5988e-05	1.7721	1.3754	up
V2786	Cer 42:1	1011947468	9.37003e+08	4.53206e+08	5.14287e+08	6.96824e+08	7.1751e+08	3.17166e+08	3.77922e+08	3.64875e+08	3.46535e+08	3.35169e+08	4.39041e+08	0.003044	1.986	1.26653	up
V2812	Cer 43:1	7.51496e+08	7.01086e+08	3.74643e+08	3.75938e+08	4.95313e+08	6.87685e+08	2.4363e+08	2.55906e+08	252935286	2.36971e+08	2.41095e+08	3.26093e+08	0.00394775	2.1753	1.17522	up
V2815	OAHFA 47:5	8.30864e+08	750635488	5.1502e+08	714842428	6.88527e+08	7.00954e+08	4.47978e+08	3.7501e+08	4.44304e+08	4.19642e+08	4.45151e+08	4.82658e+08	0.00015605	1.6066	1.15712	up
V2849	PE O-36:4	2.67184e+08	2.84911e+08	188870945	242506582	7.35263e+08	2.51655e+08	5.40702e+08	5.16857e+08	7.59926e+08	4.01353e+08	1208725596	1303240066	0.0163092	0.4165	1.60129	down
V2876	PE 36:4	668981602	3.91053e+08	9.4687e+08	1017779829	1142571627	1084939502	2.26708e+08	3.37607e+08	4.24528e+08	3.52068e+08	7.41132e+08	7.47098e+08	0.021525	1.8565	1.36729	up
V2892	PG 34:2	1503961545	1373777481	1071404659	1096141988	9.87309e+08	1420436572	6.227e+08	5.14167e+08	7.28714e+08	7.89568e+08	8.99233e+08	7.55192e+08	0.00050086	1.7294	1.57875	up
V2893	PG 34:2	6.95839e+08	6.36158e+08	8.65272e+08	1537181211	5.31436e+08	3.18832e+08	2.28029e+08	5.77453e+08	3.7001e+08	4.2482e+08	2.31232e+08	1.88595e+08	0.040686	2.2695	1.27782	up
V3201	PC 37:3	7.18454e+08	1.52597e+08	7.41886e+08	7.96022e+08	1.53496e+08	6.62585e+08	1.25872e+08	9.14719e+07	1.28941e+08	1.1444e+08	1.42867e+08	1.13166e+08	0.00394775	4.4995	1.36134	up
V3250	PI 36:4	1209773161	1455605934	1027944864	1034176909	8.89787e+08	1542594218	7.57033e+08	6.57804e+08	9.10921e+08	8.75048e+08	7.52626e+08	7.10087e+08	0.0042334	1.5353	1.33497	up
V3271	PC 39:5	2.66275e+08	2.53644e+08	3.70116e+07	4.25038e+07	7.52441e+07	2.53174e+08	4.92843e+08	2.97109e+08	5.16505e+08	4.82679e+08	3.7063e+08	2.25089e+08	0.0163092	0.38906	1.10529	down
V3296	SM 43:2	3.12976e+08	3.15965e+08	4.01163e+08	4.41098e+08	373107660	3.09989e+08	5.63568e+08	6.18875e+08	6.18655e+08	6.13966e+08	5.65819e+08	5.81882e+08	2.7087e-06	0.60467	1.12368	down
V3302	PC 39:2	4.18438e+08	3.87238e+08	1.4654e+08	137796119	252997254	3.61091e+08	4.51629e+07	2.97626e+07	4.9699e+07	5.80637e+07	4.94845e+07	4.21564e+07	0.00081227	6.2119	1.05856	up
V3321	PI 38:6	5.62993e+08	6.25299e+08	7.64222e+08	514416848	610058644	1196553346	4.72739e+07	1.35234e+08	2.24236e+08	2.4222e+08	2.33874e+08	2.73997e+08	0.00394775	3.6942	1.48991	up

## Sheet: MP vs FP
Identification number	Lipid name	MP						FP						Paired comparison
		MP1	MP2	MP3	MP4	MP5	MP6	FP1	FP2	FP3	FP4	FP5	FP6	MP/FP p value	MP/FP FC	MP/FP VIP	MP/FP regulation
V20	CE 0:0	7.63128e+08	8.60587e+08	6.14709e+08	614593426	5.39457e+08	4.06963e+08	2.45911e+08	4.57819e+08	409333741	276942779	2.64306e+08	6.1222e+08	0.0157	1.6763	1.32669	up
V62	DG 24:5	2.69359e+08	248126605	1.05446e+08	1.2649e+08	5.53531e+07	279527454	6.23813e+07	5.90424e+08	6.93897e+08	5.32888e+08	5.85059e+08	253907136	0.028344	0.39885	1.09251	down
V115	LPE 18:1	2538500747	1394976265	2531406819	2645858757	3430702316	2106428918	2124805483	1418024896	1424375603	9.1748e+08	1673537504	7.78776e+08	0.011344	1.757	2.67373	up
V154	LPC O-18:1	4.16939e+08	3.20673e+08	6.54652e+08	5.575e+08	1130425476	4.74814e+08	2.80822e+08	4.61446e+08	3.25897e+08	2.94306e+08	3.2853e+08	3.2641e+08	0.037373	1.7622	1.26414	up
V159	LPC 17:0	1657610445	1842229319	2100455331	2389595620	3246003791	1966055228	1443278952	1414110310	1526691938	1248599573	1556620829	1381090495	0.0085172	1.5404	2.31253	up
V176	LPC 18:1	57073373163	44829577753	52588539025	55240789803	64478496899	46219010482	38609611573	36539871136	33701197843	27811265369	38631441588	28754439094	0.00028181	1.5704	12.2197	up
V178	LPC 18:1	678526522	4.34915e+08	6.16807e+08	7.65079e+08	1315480759	6.45079e+08	4.97472e+08	3.2799e+08	3.12235e+08	291346488	4.41643e+08	2.76133e+08	0.013324	2.0756	1.6655	up
V191	LPC O-20:4	3.01797e+08	2.11732e+08	4.49914e+08	4.8845e+08	1338857330	4.25981e+08	1.77393e+08	2.49538e+08	1.97765e+08	2.14029e+08	2.17103e+08	7.12279e+07	0.0163092	2.8541	1.51084	up
V193	LPC 17:0	3682922831	4576844866	4642506667	5342819605	6059737367	3584844837	3899506030	2939073600	3062371037	2235487418	2790050984	1986848835	0.0032781	1.649	3.52745	up
V199	LPC 19:1	3.15417e+08	2.46934e+08	3.7613e+08	3.65604e+08	668130026	365783653	1.43344e+08	2.29532e+08	1.66997e+08	1.34933e+08	2.02601e+08	1.47796e+08	0.00394775	2.2805	1.24816	up
V214	LPC 20:4	40827229700	42648699758	42925703397	49435892793	48559876879	37453166756	27118583481	30530418800	29310150744	28572081250	31588949439	24982318639	3.3728e-05	1.5215	10.8147	up
V216	LPC 18:1	1210376093	9.02492e+08	1109355557	1333392019	2033970888	1034080581	1034591680	8.71166e+08	5.42526e+08	569435918	7.26084e+08	3.92808e+08	0.012133	1.843	2.08917	up
V223	LPC 20:2	3216451459	2445332459	2528509643	3162433524	5125526393	2281958606	4.95088e+08	1725209926	1275317923	1269407257	1431479297	1034217560	0.0019522	2.5945	3.9671	up
V226	LPC 20:1	6614599359	2320491116	4067837176	4582228807	11503849579	4115582596	1373349931	1915822571	1519746765	1790733656	2116412350	9.38766e+08	0.014529	3.4392	5.45005	up
V228	LPC 20:0	6.56152e+08	2.18233e+08	3.01076e+08	3.37764e+08	8.13803e+08	2.58927e+08	6.27936e+08	1.37348e+08	1.17522e+08	9.2089e+07	1.27385e+08	2.12286e+08	0.0249747	1.9672	1.15181	up
V237	DG O-33:6	7.3789e+08	1453492801	468787762	3.99708e+08	251351824	8.87868e+08	2.08869e+08	2477523391	3165624281	2336349760	3360909631	2656647862	0.0070719	0.29559	2.88872	down
V240	LPC 19:1	2.79366e+08	1.47116e+08	3.41201e+08	3.86841e+08	844286042	3.60616e+08	2.23743e+07	1.12078e+08	4.07368e+07	3.35879e+07	50645263	2.54608e+07	0.00394775	8.2821	1.56343	up
V242	LPC O-21:7	9.52911e+08	1070807270	1009108798	1119793071	1151189306	8.65921e+08	5.69588e+08	6.38807e+08	6.76635e+08	6.29012e+08	7.52271e+08	5.50668e+08	2.3602e-05	1.6164	1.76174	up
V265	LPC 22:5	5616929780	5445457603	4794884510	6075906292	8345666316	3673337180	2510732968	3019567913	2222920983	2287944730	2220317283	1484961506	0.00050292	2.4699	5.26595	up
V271	LPC 20:1	15218156492	6137571193	8803858414	9637338905	20239250575	8088760447	4103242551	5119263047	3265609303	2066975739	3034092894	1190799936	0.0043497	3.6275	8.00626	up
V281	LPC 22:3	4.48611e+08	1.33176e+08	2.01787e+08	2.36053e+08	6.73641e+08	1.44649e+08	4.46524e+08	7.26942e+07	5.0965e+07	4.6222e+07	5.42133e+07	8.5098e+07	0.0249747	2.432	1.09868	up
V307	TG 31:2	4.75923e+07	1.36324e+08	9.35376e+07	3.33986e+07	2.45426e+07	7.83053e+07	2.89142e+07	2.91346e+08	4.22371e+08	3.73403e+08	2.94873e+08	9.13121e+08	0.024309	0.17801	1.34572	down
V357	DG O-36:4	4.43376e+08	6.64073e+08	6.5523e+08	631909770	6.92452e+08	6.73026e+08	3.25008e+08	4.21969e+08	2.93803e+08	1.80373e+08	2.57615e+08	5.6495e+07	0.00394775	2.4491	1.5142	up
V383	TG 35:6	1.58512e+08	1.95971e+08	4.45235e+07	4.91322e+07	2.74593e+07	2.22045e+08	1.96376e+07	3.601e+08	5.78656e+08	2.73381e+08	7.64677e+08	2.6268e+08	0.043248	0.30881	1.00274	down
V461	Cer 41:2	6.86499e+08	357984486	4.3118e+08	4.94016e+08	6.44128e+08	3.76648e+08	6.66933e+08	3.4086e+08	2.29616e+08	1.69136e+08	1.93063e+08	1.99224e+08	0.037373	1.6624	1.09946	up
V482	LPC O-27:8	4.62309e+08	5.26081e+08	2266860662	8.13222e+08	5.90282e+08	8.36605e+08	1315675769	1226231367	1051430727	2402028190	1926081422	1324710183	0.037373	0.59434	1.77292	down
V487	TG O-38:5	7.84894e+08	4.67552e+08	2.72381e+08	1095135865	4.17469e+08	1118980643	2.15175e+08	2.20054e+08	193369377	1.99105e+08	9.1311e+08	5.57895e+07	0.0249747	2.3135	1.22393	up
V533	DG 38:6	1544609199	1372690443	9.69287e+08	1329816503	1738160515	2005895332	2200978940	4184438335	2749734715	3306341924	2507591344	2424624375	0.0018347	0.51575	2.76575	down
V552	PEt 31:0	6.51601e+08	5.57135e+08	4.53042e+08	6.10761e+08	7.08542e+08	8.51527e+08	1374653453	1521598854	1179185443	1344450053	1123239963	1219017511	1.1775e-05	0.49376	2.14545	down
V577	DG 38:3	7.44548e+08	2.85029e+08	5.80688e+08	7.41186e+08	1614444943	9.00703e+08	4.54831e+08	3.3979e+08	2.93587e+08	4.70916e+08	3.84581e+08	1.7715e+08	0.034655	2.2946	1.71991	up
V629	DG 40:4	7.96166e+08	5.93642e+08	7.34062e+08	7.7878e+08	1428560495	7.87525e+08	6.14468e+08	6.63238e+08	4.12942e+08	5.17581e+08	4.0691e+08	2.65703e+08	0.0104056	1.7768	1.63012	up
V652	TG O-42:7	8.73955e+08	6.66731e+08	8.95644e+08	1014744099	1760385691	1033310340	6.9899e+08	6.64258e+08	4.81086e+08	7.04993e+08	4.76595e+08	3.42024e+08	0.015795	1.8542	1.79402	up
V682	PC 30:0	9.99156e+08	874877920	1051644187	8.25665e+08	1016580045	9.09477e+08	1693579452	1533594690	1081361574	1493729440	2161539808	1857140703	0.0011434	0.57809	1.92859	down
V892	PC 34:1	2686356939	2114171355	2462078118	2147535849	3056992941	1116235666	7301214335	2709825388	2863678194	3041068469	2631929248	3650160053	0.037373	0.61192	2.69057	down
V935	PG 34:3	3.73306e+07	7.84718e+08	699907699	6.70601e+08	5.91087e+08	2.16186e+08	1.72956e+07	2.06036e+07	2.60723e+08	3.61388e+08	2.50097e+08	2.63224e+08	0.049115	2.5567	1.32436	up
V1000	PC 36:5	2.58666e+08	320207793	2.96522e+08	2.12436e+08	2.24897e+08	2.47393e+08	6.48313e+08	4.04839e+08	4.51196e+08	2.91785e+08	3.54749e+08	3.47024e+08	0.01617	0.62457	1.03031	down
V1024	PC 36:3	8563240490	7889653107	8262731161	3853152068	8110611820	6367093554	7170218345	3741186548	4518565613	3497375319	4283629659	5158530613	0.037373	1.5174	3.31285	up
V1083	PC 37:6	6.27597e+08	9.45664e+08	516222100	7.21243e+08	6.79181e+08	5.87192e+08	1594717722	668825806	935087084	1212116065	9.69611e+08	1238363064	0.014439	0.616	1.48432	down
V1122	PC 37:3	6.95185e+08	5.09796e+08	5.89736e+08	4.39553e+08	589089288	448842237	1.60778e+08	5.16643e+08	4.17111e+08	2.23796e+08	3.7605e+08	2.5729e+08	0.0087448	1.6766	1.18752	up
V1137	PC 38:8	513726844	4.99608e+08	4.23395e+08	7.09956e+08	6.60322e+08	4.79839e+08	286291326	1.80337e+08	2.0713e+08	1.98123e+08	2.27508e+08	2.24829e+08	4.685e-05	2.4821	1.57224	up
V1139	PC 36:5	8.48811e+08	1519837666	1357395155	1062322505	9.2855e+08	1244734048	1302575423	1421679414	3140670423	1881698252	1345069578	1555690800	0.037373	0.65384	1.79676	down
V1145	PC 38:7	3201459179	2895178073	2309079937	2458282431	3409551241	2606654108	2881043216	5613129552	4493528814	6617188881	3228325899	3632532664	0.027932	0.63781	2.44722	down
V1146	PC 38:7	4240785724	4428909138	4678575948	4757993647	3758875340	4109271433	1190363230	2764124808	3624169277	1746600983	3257886961	3875269992	0.0064695	1.5782	3.21346	up
V1271	PC 39:6	3.04104e+08	5.40631e+08	3.48584e+08	3.25901e+08	2.4823e+08	2.72439e+08	9.04185e+08	5.28405e+08	6.74616e+08	4.63043e+08	5.06995e+08	5.26203e+08	0.0084729	0.56609	1.28618	down
V1307	PC 38:7	7.23464e+08	6.02082e+08	5.42315e+08	607356517	599467606	6.68498e+08	2.44515e+08	4.12775e+08	4.24464e+08	3.61135e+08	4.83687e+08	5.31959e+08	0.0012817	1.5225	1.23516	up
V1317	PC 40:9	2165049659	1924865917	2245011509	2482180841	2083365315	2188311764	5.52728e+08	1312009972	1185924313	1053172493	1366604212	1999815524	0.0010821	1.7521	2.57706	up
V1318	PC 40:9	8.1853e+08	1035341402	768444152	9.60234e+08	1061497708	7.09912e+08	3.5894e+08	2.94912e+08	257537460	2.83263e+08	3.57072e+08	5.37469e+08	2.1275e-05	2.5627	2.09502	up
V1331	PC 40:8	8600133120	7583225900	7810501157	8201347860	6743196663	7594619077	3498159527	6962424470	4317100504	4660468041	6073356804	4820483889	0.00082593	1.5341	4.23644	up
V1384	PC 40:5	4385463637	2193215381	2470633853	2149933971	2549081768	1550905782	1106888693	2304264989	1589345540	1165665747	1344708497	9.47415e+08	0.027454	1.8088	2.66699	up
V1397	PC 40:4	3041442707	1344679593	1351933230	1549075735	2066170169	1158160081	2470034327	9.18381e+08	7.57224e+08	6.92892e+08	6.6416e+08	8.488e+08	0.037373	1.655	1.93928	up
V1406	SM 45:10	2.10185e+08	2.90957e+08	2.10751e+08	3.80986e+08	3.39057e+08	2.53952e+08	8.98834e+07	6.77435e+07	8.99479e+07	6.09828e+07	9.96216e+07	1.19072e+08	6.808e-05	3.1975	1.20627	up
V1501	PC 40:8	439369817	5.00228e+08	555369140	5.53994e+08	4.91327e+08	5.78863e+08	2.73148e+08	4.36657e+08	2.5734e+08	3.71969e+08	4.06679e+08	2.90381e+08	0.00070759	1.5319	1.03523	up
V1502	PC 42:11	1359614351	1620406506	1314639511	1356859427	1443492706	1040717490	331210192	722948876	8.30781e+08	6.17349e+08	754174917	1226690566	0.0016044	1.8147	2.22198	up
V1520	PC 42:10	5.20732e+08	5.36414e+08	5.32221e+08	4.88335e+08	763265737	892967999	3.10055e+08	3.33801e+08	2.77559e+08	4.76702e+08	5.22521e+08	5.15137e+08	0.0163092	1.533	1.03803	up
V1574	TG 51:3	1172418811	4.81029e+08	1304984171	1013805688	1103963388	1072434648	2161250788	1907471306	2008461221	1197141408	1518563667	7.58964e+08	0.045798	0.64371	2.10805	down
V1672	PC 44:14	2.35404e+08	3.22727e+08	272787875	2.8178e+08	2.63582e+08	1.88471e+08	5.92517e+07	1.08293e+08	1.29454e+08	9.83317e+07	1.21187e+08	1.98755e+08	0.00031661	2.1876	1.05659	up
V1694	PC 44:12	3422539881	4093738675	3073558554	3915321007	5461454633	3483152638	2233597424	2584537294	2056945349	2657048335	2861476080	2775045524	0.0037754	1.5459	3.34494	up
V1846	d5-TG 54:6	1.26502e+08	105964019	1.76434e+08	1.65717e+08	2.27408e+08	2.24299e+08	4.33662e+08	4.09483e+08	3.94285e+08	2.63974e+08	2.77545e+08	9.73229e+07	0.02911	0.547	1.0195	down
V1868	PI 40:9	2.87454e+08	3.70925e+08	4.12223e+08	3.43743e+08	3.52162e+08	1.88709e+08	3.58857e+07	212197446	1.71736e+08	3.8523e+07	1.04688e+08	1.98342e+08	0.0013662	2.568	1.18599	up
V2058	TG 58:11	7.93281e+08	5.46995e+08	1037596134	1588918048	7.95347e+08	7.09839e+08	5.48068e+08	3.08659e+08	7.51896e+08	3.36851e+08	3.84766e+08	5.66734e+07	0.016205	2.2925	1.53666	up
V2098	TG 57:3	8.15151e+07	6.08333e+07	4.37053e+07	3.32156e+07	3.56701e+07	7.37317e+07	5.13664e+07	2.53835e+08	3.18253e+08	2.38341e+08	2.58177e+08	3.349e+08	0.0012263	0.22591	1.03329	down
V2101	TG 58:7	4195308293	4399715333	3150012578	3870273258	5026509016	3321765457	1741754194	2880517301	2952306791	3081473112	2480461683	1837476630	0.0024104	1.6003	3.43282	up
V2119	TG 58:5	2156151792	1724379316	1349479196	1817203514	2342302854	2273596640	1932294263	1031619673	746789719	1113059922	1087177126	1597403532	0.014745	1.5534	1.9133	up
V2121	TG 58:7	4.7494e+08	7.54205e+08	4.8847e+08	5.68255e+08	7.06012e+08	4.96597e+08	171665109	3.5488e+08	3.93452e+08	4.38054e+08	3.3276e+08	3.06916e+08	0.0024388	1.7462	1.37714	up
V2132	TG 58:6	7.0906e+08	7.12044e+08	5.60583e+08	7.32064e+08	9.34793e+08	6.91224e+08	3.61637e+08	4.50624e+08	4.42258e+08	5.43686e+08	4.59177e+08	5.3142e+08	0.00097836	1.5561	1.44413	up
V2141	TG 58:5	6.0301e+08	6.00497e+08	4.80304e+08	5.95332e+08	6.43582e+08	6.24446e+08	5.02728e+08	2.87139e+08	2.80519e+08	3.8402e+08	3.18391e+08	5.52386e+08	0.0104056	1.5255	1.10864	up
V2167	TG 60:12	1958127072	2131413534	1360480302	2390276843	2131895361	1848133356	1440305762	1026898759	1655929023	1229169224	1243849104	9.08058e+08	0.0026312	1.5752	2.16461	up
V2181	TG 60:10	2246951506	2087398230	1556029457	1859747555	2635560763	2191421568	1135375180	1492206456	1407668440	1720785498	1611928670	6.68321e+08	0.0058167	1.565	2.30203	up
V2184	TG 60:12	6.2181e+08	8.6014e+08	5.32925e+08	8.07357e+08	764942794	5.82281e+08	5.82674e+08	2.12356e+08	4.28058e+08	4.85441e+08	3.70124e+08	3.71323e+08	0.0032647	1.7018	1.33846	up
V2188	TG 60:9	1807027607	1455149467	1094937362	1383288187	1916141982	1434765312	9.05415e+08	9.97729e+08	9.15475e+08	1111225364	1070649919	9.0749e+08	0.001984	1.5388	2.05087	up
V2189	TG 60:9	5.42139e+08	5.50064e+08	4.34007e+08	4.52994e+08	6.386e+08	5.34708e+08	9.529e+07	3.54586e+08	3.75628e+08	4.13292e+08	4.03836e+08	3.14804e+07	0.00394775	1.8831	1.25865	up
V2191	TG 60:9	5.24269e+08	7.73518e+08	5.76953e+08	578301409	7.39948e+08	6.5035e+08	1.95287e+08	3.96188e+08	318772393	5.41491e+08	4.59875e+08	4.14333e+08	0.0025587	1.6524	1.37324	up
V2201	TG 60:8	5.67601e+08	6.34805e+08	4.96701e+08	5.8763e+08	7.42311e+08	4.74366e+08	9.0998e+07	3.92239e+08	4.23223e+08	4.55199e+08	4.45578e+08	4.91719e+07	0.00394775	1.8872	1.3837	up
V2202	TG 60:8	4.71252e+08	4.94664e+08	3.96046e+08	4.27019e+08	6.08372e+08	4.35692e+08	5.1275e+07	4.50624e+08	4.31428e+08	3.15599e+08	3.93381e+08	3.10225e+07	0.042957	1.6931	1.08344	up
V2203	TG 60:8	1882109565	1092227017	9.04e+08	1090437922	1799597989	1152130687	1109259507	7.371e+08	5.42914e+08	7.5336e+08	7.97835e+08	7.42483e+08	0.015161	1.6913	1.95845	up
V2205	TG 60:8	3.3516e+08	5.81789e+08	3.00216e+08	2.73518e+08	372029779	4.14471e+08	9.59872e+07	2.24586e+08	1.46174e+08	2.48354e+08	1.95459e+08	3.5849e+08	0.016615	1.7944	1.10385	up
V2208	TG 60:10	3.55542e+08	5.10481e+08	3.29143e+08	4.07962e+08	4.72531e+08	4.29309e+08	1.70559e+08	2.32091e+08	2.44414e+08	3.10979e+08	2.82621e+08	2.89584e+08	0.00089002	1.637	1.12284	up
V2213	TG 60:7	1040432350	7.01628e+08	6.26951e+08	7.05265e+08	1181812997	8.3017e+08	495877707	507050850	4.25184e+08	5.87599e+08	5.19098e+08	1.15582e+08	0.00394775	1.9191	1.72754	up
V2225	TG 60:6	6.56321e+08	5.47938e+08	3.73552e+08	5.27081e+08	8.14645e+08	6.24882e+08	4.97495e+08	2.2425e+08	1.81727e+08	2.75641e+08	2.55789e+08	4.70919e+08	0.0071484	1.8598	1.31624	up
V2269	TG 62:13	4029025769	2604415118	2161493109	3298040617	4259378024	3088329078	1888463068	1560603784	2206827929	2193266707	2747744614	7.57441e+08	0.010754	1.7122	3.1241	up
V2274	TG 62:12	5.47437e+08	4.16103e+08	3.24986e+08	5.19515e+08	6.97951e+08	5.66575e+08	4.32371e+08	1.89713e+08	2.59489e+08	3.08233e+08	2.79374e+08	1.71048e+08	0.004348	1.8733	1.24963	up
V2275	TG 62:12	7.97851e+08	8.04451e+08	4.43517e+08	6.77672e+08	8.85837e+08	6.77878e+08	4.34124e+08	3.73206e+08	4.13349e+08	5.96435e+08	4.69612e+08	3.56741e+08	0.0036325	1.6218	1.4238	up
V2277	TG 62:14	1002142617	1083263253	8.43208e+08	1392090523	1269895884	8.95377e+08	6.92191e+08	4.37758e+08	864743844	7.16649e+08	7.69898e+08	3.04833e+08	0.0045352	1.7131	1.73187	up
V2279	TG 62:11	369484513	526739108	2.43687e+08	3.1997e+08	4.29826e+08	3.72571e+08	1.59945e+08	1.81149e+08	1.59322e+08	2.7003e+08	1.83659e+08	3.35531e+08	0.0079321	1.7542	1.10389	up
V2281	TG 62:13	988353975	8.59803e+08	6.98002e+08	8.97637e+08	1151349183	832645960	5.32183e+08	4.39901e+08	5.69659e+08	6.27829e+08	7.06002e+08	2.89177e+08	0.0014539	1.7151	1.69256	up
V2390	FA 16:3	4.61486e+08	3.39949e+08	3.70514e+08	4.51559e+08	6.75913e+08	2.69857e+08	3.08696e+08	2.75737e+08	1.85905e+08	1.48929e+08	1.53786e+08	1.77557e+08	0.0062304	2.0544	1.30368	up
V2392	FA 16:2	7.24e+08	4.67736e+08	4.95643e+08	4.96993e+08	8.15886e+08	4.52796e+08	5.42975e+08	4.38363e+08	3.32437e+08	2.82592e+08	2.87333e+08	218190213	0.0249747	1.6428	1.28572	up
V2421	FA 19:1	8.22799e+08	7.25584e+08	1004869355	9.10816e+08	1531422491	8.03511e+08	8.55354e+08	7.02949e+08	502911625	5.0388e+08	6.56323e+08	2.97818e+08	0.0163092	1.6478	1.62233	up
V2427	FA 20:4	20037481015	13079731708	10423874589	11982517842	14120514270	11438093768	12245854380	10903773676	7009505615	6741848146	9156474579	7910941763	0.022135	1.5024	5.37515	up
V2429	FA 20:3	36737050308	22887386849	24815957103	32472945780	42059345767	27272154134	25814438439	23370255958	17615531018	20052764575	21451314033	13423012783	0.012096	1.53	9.16517	up
V2430	FA 20:3	6841078584	3651819558	4886882784	6419404232	7269612083	4502577157	4791577658	2909338137	2347802544	3471581411	4153203287	2020196228	0.010351	1.7047	4.10757	up
V2431	FA 20:2	11079869277	9048799029	9309903538	9723582801	17744948597	9467566663	8521301982	8521651787	4734558953	6538588371	5996847796	2979496253	0.00394775	1.7798	6.0395	up
V2432	FA 20:2	2319486908	1301808675	1907529669	1676928724	3431596430	2120276628	1443733893	1362799845	7.93924e+08	1252181641	1244823058	4.5487e+08	0.011904	1.947	2.70262	up
V2447	FA 22:6	2484661568	5.99814e+08	1059312592	1964226273	1168774536	4.22507e+08	4.49031e+08	3.72109e+08	3.31588e+08	3.80399e+08	4.0571e+08	1390736005	0.037373	2.3124	1.96857	up
V2450	FA 22:5	15824024936	14849950919	10834759193	17823939416	21847038029	12531125370	18042139933	7629933167	7061412764	9486549101	8042854144	7216772984	0.037373	1.6303	6.23638	up
V2451	FA 22:5	3300621776	2423946618	1288867738	2670072866	3635206095	2100399999	2128822421	931008224	1091743125	1643663022	1046821309	1003966426	0.0096597	1.9652	3.01184	up
V2453	FA 22:4	11970115099	13551048237	8216627005	12796069698	15405225628	8084998824	9931022899	8506912032	5826325346	6692793169	5517828527	7197279344	0.010054	1.6034	5.7274	up
V2454	FA 22:3	4.12699e+08	2.75031e+08	193035617	3.94137e+08	7.40065e+08	2.10013e+08	3.77944e+08	1.43768e+08	1.50164e+08	1.21984e+08	1.0297e+08	1.10105e+08	0.0163092	2.2097	1.216	up
V2455	FA 22:3	2169895825	1191110688	1597655664	1858371834	3493682174	2253064691	1344019312	1172515124	5.71732e+08	1309870133	9.80634e+08	3.56375e+08	0.010486	2.1907	2.80666	up
V2473	FA 24:6	5203390799	3737408418	3271619232	4184892279	9237345314	3952032204	5224078479	2669451066	1687234424	2909314677	2660946062	1134780769	0.037373	1.8167	3.99929	up
V2477	FA 24:5	1256787737	2097166065	8.24364e+08	1011728143	2369292488	8.85063e+08	1181653340	5.99923e+08	4.22382e+08	586634998	649709373	1.34041e+08	0.023689	2.3625	2.36077	up
V2479	FA 24:4	1041025867	1278923468	8.27548e+08	1228395452	2316123012	8.32378e+08	8.95833e+08	7.02656e+08	3.78864e+08	5.11501e+08	4.20253e+08	3.75634e+08	0.0104056	2.2907	2.30681	up
V2497	ST 24:1+O4	7.3989e+08	3.93379e+08	5.57086e+08	518580974	1055450389	6.09805e+08	5.65951e+08	4.98504e+08	2.53768e+08	3.98242e+08	3.93911e+08	141303644	0.038686	1.7206	1.39687	up
V2507	PA 18:3	4.72731e+08	332692838	3.24251e+08	3.15855e+08	2.92772e+08	2.4772e+08	498039404	5.58022e+08	5.24249e+08	5.82797e+08	503001521	4.59111e+08	0.00035247	0.63548	1.06089	down
V2523	LPI O-10:0	8.13851e+08	5.71437e+08	5.60381e+08	4.91553e+08	4.25823e+08	3.29687e+08	1050324164	9.61851e+08	1056039213	1097887346	8.52704e+08	8.55193e+08	0.00023391	0.54354	1.70428	down
V2528	LPE 18:1	4113908137	1705402259	4046220772	4427978123	6530223542	3844130762	2831428920	1922027187	1865747832	1289258760	2486954211	928442976	0.0092344	2.1784	3.89219	up
V2808	Cer 43:2	1013462730	6.47969e+08	795408028	7.0742e+08	7.46248e+08	202353603	632844600	7.15746e+08	1.47321e+08	1.48536e+08	1.45824e+08	1.72739e+08	0.0249747	2.0952	1.46572	up
V2937	PE 38:6	4.15244e+08	3.82375e+08	4.79353e+08	5.09382e+08	4.02362e+08	3.89098e+08	6.12677e+07	9.15641e+07	113880925	2.61821e+08	2.4763e+08	3.85965e+08	0.0016926	2.2182	1.28377	up
V2960	PG 36:4	8843370988	11392945082	1400999738	1225978114	1008369535	6.85266e+08	4.35966e+08	9.91248e+08	5.66649e+08	4.16397e+08	3.42263e+08	1205197584	0.0163092	6.2048	4.12848	up
V3125	LBPA 40:7	6854293373	4426158239	3286124026	4314950712	2998742524	3797635753	3116055490	3216004186	2625133377	1058197759	2059218722	2552915172	0.017738	1.7555	3.04838	up
V3274	PG 44:11	4.83735e+08	3.31886e+08	3.41144e+08	5.33831e+08	6.68704e+08	383484342	3.33588e+07	1.54871e+08	1.47704e+08	1.95454e+08	1.54991e+08	2.39394e+08	0.00052788	2.9627	1.55555	up

## Sheet: MT vs FT
Identification number	Lipid name	MT						FT						Paired comparison
		MT1	MT2	MT3	MT4	MT5	MT6	FT1	FT2	FT3	FT4	FT5	FT6	MT/FT p value	MT/FT FC	MT/FT VIP	MT/FT regulation
V42	CAR 18:2	2.09278e+08	6.10689e+08	1.69397e+08	2.1469e+08	184108295	1.26899e+08	1.13522e+08	9.54896e+07	2.38452e+08	1.13056e+08	5.81839e+07	8.27274e+07	0.037373	2.16	1.00828	up
V213	LPC 20:5	7.08963e+08	7.23001e+08	884375511	4.66679e+08	3.62624e+08	5.07281e+08	3.44438e+08	489613245	4.2518e+08	4.58777e+08	441725203	177716745	0.038997	1.5628	1.24903	up
V325	TG O-32:0	9.08002e+08	4.16494e+08	8.70127e+08	1261056393	1702939487	1354677190	2536430387	1683857214	1199776268	2911778670	1614036231	1521262254	0.029978	0.568	2.59306	down
V342	DG 34:1	2.04903e+08	8.42492e+07	1.82459e+08	1.8952e+08	2.88121e+08	1.77494e+08	5.46629e+08	3.79642e+08	3.02895e+08	4.26784e+08	1.83281e+08	2.39995e+08	0.02485	0.54191	1.1168	down
V378	DG 34:1	4342643456	2406747965	4764670435	5770219306	7511352143	5798392564	14595997223	10449832124	7772566172	11061414738	5955717274	6736331064	0.016001	0.5408	6.10534	down
V397	DG 36:4	4.3306e+08	6.71734e+07	4.79618e+08	6.57301e+08	7.85823e+08	6.69789e+08	1675295552	1422752464	7.04859e+08	1347221431	5.54879e+08	1029673411	0.01475	0.45923	2.30929	down
V416	DG 36:2	494725233	4.61556e+08	5.94306e+08	5.45337e+08	8.44219e+08	4.96389e+08	1354467872	1105529769	7.72605e+08	9.43796e+08	5.44975e+08	8.29643e+08	0.037373	0.61908	1.69569	down
V471	DG 36:2	12459746014	13544471733	18732518685	16715820961	22696645016	15469205832	37321986400	30617287837	21702125309	26022332619	17316162138	23678786783	0.015324	0.63589	9.07833	down
V548	TG O-38:4	266387744	2.38445e+08	5.68802e+08	527811675	5.1485e+08	7.86847e+08	1145320349	8.74164e+08	457756389	7.5922e+08	7.39909e+08	1762774644	0.042181	0.50585	1.89055	down
V553	DG 38:3	5.28625e+08	2.41666e+08	5.52071e+08	5.46266e+08	6.23755e+08	6.77999e+08	1035654423	9.86622e+08	7.83165e+08	9.65249e+08	651956877	9.26652e+08	0.0017194	0.59267	1.84528	down
V559	DG 38:2	2056725946	1660980908	3275564185	2869609458	3719744919	3655797708	7851193411	5920910320	3121805831	5265488644	3804764171	4429747172	0.017666	0.56717	4.48534	down
V576	DG 38:3	6.99286e+08	3.07476e+08	7.04596e+08	690374285	8.1581e+08	8.62728e+08	1118688490	1082482251	9.80678e+08	1092721252	8.29697e+08	1218715059	0.0031494	0.64531	1.84313	down
V608	TG O-40:7	6.01677e+08	7.41048e+08	5.21775e+08	6.74064e+08	2.48671e+08	4.31418e+08	3.79119e+08	3.44866e+08	3.31403e+08	3.13175e+08	2.49895e+08	3.12558e+08	0.016819	1.6668	1.33092	up
V611	NAGly 41:4	3.37099e+08	2.83902e+08	2.79333e+08	5.06059e+08	4.01367e+08	3.84152e+08	5.3908e+08	7.76127e+08	4.67192e+08	6.36254e+08	3.40072e+08	6.2086e+08	0.018774	0.64857	1.15998	down
V615	DG 40:6	1775116893	2587845672	2092646067	2490089893	1674635849	759212100	8.8174e+08	1865626058	9.30109e+08	5.70952e+08	1100012419	4.77089e+08	0.021304	1.9534	2.64436	up
V631	DG 40:4	8.14112e+08	1.69589e+08	9.92561e+08	1050815708	8.5323e+08	1377745617	1704050490	1805519197	9.69607e+08	1710774928	1221714887	1611369685	0.014329	0.58274	2.3583	down
V639	DG 40:6	1114206840	1224680027	1059269260	1309143219	9.23726e+08	3.59225e+08	1.78476e+08	8.11918e+08	1.98699e+08	3.00202e+08	6.08973e+08	1.8259e+08	0.0057404	2.6263	2.30925	up
V682	PC 30:0	5.97279e+08	7.95101e+08	1072788537	8.62612e+08	1311569830	9.91621e+08	1158729699	1651801894	9.6799e+08	2165033753	2031289970	1086952625	0.033632	0.6214	1.9298	down
V944	PC O-34:1	4.2636e+08	6.82925e+08	6.61336e+08	6.23565e+08	5.60884e+08	3.56427e+08	3.50176e+08	4.70247e+08	3.42567e+08	3.60417e+08	3.85552e+08	1.8388e+08	0.011957	1.5823	1.16607	up
V1089	TG 46:2	3.94897e+08	2.23936e+08	659015383	6.4558e+08	1538115754	6.37758e+08	1096278847	8.59871e+08	1020432197	2508941682	1229032843	6.86086e+08	0.037373	0.55391	1.78452	down
V1146	PC 38:7	7.7476e+08	7.54339e+08	9.39946e+08	6.51626e+08	3.1184e+08	6.51788e+08	1.79612e+08	2.67239e+08	5.36109e+08	5.01127e+08	3.15304e+08	1.61562e+08	0.0080819	2.0828	1.65921	up
V1208	PC 38:3	3003200829	2053019367	3379733595	2539258259	3377016931	5250089689	5679853563	6279077351	4763487530	4790235045	4671886316	10366187927	0.0163092	0.5363	4.57242	down
V1220	PG 38:5	704058342	5.50682e+08	471848615	4.52413e+08	4.45458e+08	4.99925e+08	1.79835e+08	323092844	5.27721e+08	2.88974e+08	2.80677e+08	4.77717e+08	0.025931	1.5035	1.20288	up
V1276	TG 48:2	2658130141	1543304614	4032170331	3994012412	7702930378	5097626173	7857342561	5862734710	7741278582	12976506285	8453951864	7252843177	0.0098247	0.49912	5.69917	down
V1290	TG 48:1	2127296606	1222667650	2641294535	3320000990	5946445824	4298748006	6987523730	4367281130	4313619437	9024992525	5704519178	5067079999	0.025481	0.55143	4.68728	down
V1295	TG 48:3	1.39871e+08	7.08336e+07	2.25294e+08	2.25828e+08	7.79141e+08	2.51628e+08	5.30761e+08	3.74475e+08	5.79475e+08	8.06901e+08	5.79087e+08	6.1932e+08	0.037373	0.48498	1.50032	down
V1305	TG 48:2	2.67526e+08	1.18006e+08	346734191	3.77501e+08	8.97852e+08	5.45563e+08	8.83282e+08	5.82588e+08	8.16478e+08	1052189723	9.14507e+08	1163198724	0.006035	0.47174	1.99629	down
V1315	TG 48:1	1.94334e+08	9.05839e+07	2.05216e+08	2.86287e+08	5.80623e+08	3.95211e+08	6.0717e+08	347744273	4.34775e+08	5.98724e+08	5.04424e+08	568969714	0.024566	0.57229	1.40249	down
V1317	PC 40:9	7.0663e+08	3.02594e+08	4.24587e+08	381887601	2.09266e+08	5.30417e+08	1.4959e+08	2.13146e+08	2.58372e+08	2.56209e+08	2.58788e+08	2.62727e+08	0.037373	1.8268	1.1614	up
V1356	PC 38:3	5.18378e+08	364478233	5.4902e+08	4.61099e+08	4.66422e+08	7.72327e+08	7.95661e+08	6.81427e+08	6.0087e+08	6.48373e+08	6.97577e+08	1383503805	0.0249747	0.65144	1.32835	down
V1361	TG 49:2	7.39613e+07	7.14782e+07	1.05974e+08	1.12279e+08	2.38378e+08	1.59627e+08	3.1801e+08	1.93266e+08	250121916	4.78535e+08	2.31784e+08	2.20982e+08	0.011219	0.44999	1.09396	down
V1373	PS 40:6	317340208	2.00293e+08	1.85087e+08	1.93899e+08	2.03387e+08	224666362	1.03936e+08	1.27651e+08	1.41564e+08	5.8839e+07	5.76154e+07	1.48077e+08	0.00394775	2.0773	1.00023	up
V1430	MGDG 40:9	5.91683e+08	7.2389e+08	9.17866e+08	6.59154e+08	7.13077e+08	5.38798e+08	1727092898	1822437666	2208937335	2582829587	2126398964	1909113256	1.7536e-06	0.33486	3.46517	down
V1439	TG 50:5	3.10226e+08	6.74519e+08	7.45201e+08	2.01816e+08	2.33469e+08	3.75472e+08	1.22643e+08	1.43468e+08	1.8448e+08	5.78812e+08	1.5156e+08	3.86818e+07	0.0249747	2.0831	1.0372	up
V1448	PC 41:8	7.24842e+07	8.1436e+07	1.23756e+08	7.95095e+07	9.25498e+07	6.74305e+07	285932371	2.88567e+08	3.29396e+08	3.46502e+08	263765821	2.70127e+08	1.114e-07	0.28984	1.39383	down
V1456	TG 50:4	4.56164e+08	196201761	521929088	6.08974e+08	8.43849e+08	5.88996e+08	7.534e+08	763958878	8.53096e+08	830460592	6.59989e+08	1158081312	0.022374	0.64079	1.5458	down
V1465	d5-TG 50:6	286639629	1.15402e+08	3.36151e+08	3.47781e+08	5.07343e+08	3.47837e+08	5.28219e+08	479526783	4.9183e+08	4.90196e+08	3.78806e+08	7.03377e+08	0.018945	0.6319	1.26448	down
V1472	TG 50:3	8873714164	6946764196	13684731377	13156655918	18274701775	12626911483	18253562116	17998927980	21074806250	23335436054	17673306998	17247665599	0.0041593	0.63645	7.69471	down
V1478	d5-TG 50:5	9.16595e+07	5.06783e+07	1.2996e+08	1.28079e+08	1.21688e+08	1.99088e+08	3.24368e+08	1.94472e+08	1.19927e+08	2.77064e+08	2.06861e+08	3.49304e+08	0.011866	0.48991	1.03642	down
V1482	TG 50:2	5.53504e+08	4.65923e+08	8.03958e+08	7.13838e+08	1155040184	4.11082e+08	1436700673	919525039	1126203826	1673011556	1159562870	9.72641e+08	0.0084873	0.56305	1.97262	down
V1488	TG 50:4	3.76823e+08	2.38406e+08	4.8393e+08	5.6152e+08	1256079860	5.23209e+08	8.87645e+08	7.92802e+08	1123375601	1190998887	1025499879	9.00484e+08	0.025381	0.581	1.74212	down
V1497	TG 50:1	7.48617e+08	5.8493e+08	8.09786e+08	9.3561e+08	1325121279	7.59112e+08	1093113353	1304943966	1086253201	1866993489	1429180710	1167488694	0.015577	0.64962	1.75031	down
V1574	TG 51:3	3.87645e+08	4.17862e+08	5.288e+08	5.55815e+08	9.26449e+08	616339132	1073396195	7.7411e+08	1165064254	1570590479	8.87121e+08	6.60206e+08	0.015889	0.55997	1.78519	down
V1592	TG 51:2	6.52713e+08	6.73513e+08	891373535	8.11378e+08	1095681593	9.96826e+08	1570554806	1198844819	1527581623	2357997855	1496472699	1060794528	0.006249	0.55594	2.27153	down
V1775	TG 54:9	252701504	2.22825e+08	1.61288e+08	1.93199e+08	5.01984e+07	8.72215e+07	4.45248e+07	5.25729e+07	4.33162e+07	6.11882e+07	4.03248e+07	8.25944e+06	0.0046479	3.8669	1.06141	up
V1776	TG 54:9	342394792	5.02664e+08	4.69076e+08	3.76617e+08	1.95873e+08	1.83406e+08	1.09848e+08	2.30358e+08	2.27708e+08	3.08265e+08	1.96678e+08	5.64408e+07	0.039059	1.833	1.12209	up
V1778	TG 53:2	1.06065e+08	48540861	1.34393e+08	1.55577e+08	2.88009e+08	188314232	2.42954e+08	2.04711e+08	2.73242e+08	4.60459e+08	3.03678e+08	2.93737e+08	0.015187	0.51771	1.02469	down
V1794	TG 54:8	7.98918e+08	1007707099	1069719424	6.48185e+08	3.821e+08	3.9302e+08	2.63685e+08	3.69119e+08	4.07186e+08	5.16642e+08	3.3646e+08	5.87821e+07	0.01667	2.2028	1.76946	up
V1805	TG 54:7	1166243506	2169457488	1384601949	1664834568	9.05657e+08	8.77126e+08	5.70475e+08	8.26211e+08	8.45217e+08	1129924677	9.19188e+08	2.1472e+08	0.029368	1.8128	2.22682	up
V1806	TG 54:7	4823818299	6084563789	6382763777	5031466596	3817445436	1708600088	1694243463	2414378408	2378142749	2605403217	2073654861	6.17516e+08	0.0054505	2.3634	4.7347	up
V1807	TG 54:7	7550120871	4688808278	8486056614	6908639498	4890238945	9448856522	8254597502	13080765707	10731944684	13240499680	12417910694	6708986684	0.020206	0.6514	5.32152	down
V1827	TG 54:7	9.0573e+08	8.16127e+08	1125667229	8.56838e+08	1168402270	7.06588e+08	7.98775e+08	5.13083e+08	9.47858e+08	5.03688e+08	5.78276e+08	2.23257e+08	0.024539	1.5651	1.45268	up
V1829	TG 54:7	1001028327	5.86832e+08	7.07275e+08	9.60212e+08	769592877	1058441412	9.10151e+08	2076232082	1256303023	2068218799	2326743150	1935201339	0.0032307	0.4808	2.52257	down
V1915	TG 56:11	4.73188e+08	3.84794e+08	4.62554e+08	3.8805e+08	111114315	176740849	5.8726e+07	1.20572e+08	115095011	1.18184e+08	8.40317e+07	1.56263e+07	0.0032719	3.8975	1.48174	up
V1927	TG 56:10	5.53475e+08	1069993274	6.85718e+08	7.36171e+08	2.19864e+08	3.3472e+08	1.38917e+08	2.70249e+08	1.86172e+08	2.97526e+08	2.17699e+08	3.79185e+07	0.010532	3.1345	1.87692	up
V1941	TG 56:11	2.79905e+08	2.02964e+08	2.93628e+08	2.40785e+08	9.31106e+07	1.34832e+08	5.32422e+07	9.51433e+07	9.82018e+07	9.81801e+07	7.58832e+07	1.92486e+07	0.0034205	2.8307	1.06324	up
V1950	TG 56:10	3.12245e+08	2.61569e+08	5.56407e+08	396649884	1.81157e+08	2.45517e+08	1.51522e+08	1.66792e+08	1.86507e+08	2.15024e+08	1.57609e+08	3.72683e+07	0.016397	2.1357	1.01267	up
V1960	TG 56:9	3.4115e+08	5.58338e+08	258770518	2.13955e+08	1.62075e+08	1.64e+08	1.77926e+08	1.34623e+08	1.53845e+08	1.45593e+08	1.09872e+08	2.72523e+07	0.035519	2.2671	1.14789	up
V2034	TG 57:7	6.48127e+08	3.37284e+08	4.85385e+08	6.13416e+08	4.57874e+08	6.88099e+08	5.17954e+08	1219171849	7.3553e+08	1229636470	1348948983	1103442896	0.0069236	0.52483	1.80109	down
V2057	TG 58:11	1073202283	1260791259	1661589989	1269518680	200595739	5.05031e+08	2.76818e+08	6.8602e+08	3.02706e+08	3.8182e+08	4.80518e+08	3.20021e+07	0.023781	2.7644	2.17557	up
V2058	TG 58:11	8.44132e+08	2029535364	4.13556e+08	8.63078e+08	2.72386e+08	5.15447e+08	1.72714e+08	1.64794e+08	2.6286e+08	388140020	1.25235e+08	1.55154e+07	0.037477	4.3729	2.31364	up
V2059	TG 58:11	3372141723	4391682520	4466026133	3436460436	1240035071	2239350635	1008368907	2061055102	1757097297	1910787313	1865910051	4.83635e+08	0.01507	2.107	3.74206	up
V2065	TG 58:10	7234175615	14336668752	7678161729	9343072884	3740771722	5714943282	4707376292	5829748819	4952290313	5364185256	3575354320	8.38349e+08	0.045087	1.9016	5.4669	up
V2066	TG 58:10	2.14923e+08	4.12132e+08	2.77193e+08	1.50863e+08	7.55441e+07	1.36612e+08	3.82832e+07	103912307	9.55562e+07	1.24254e+08	7.68194e+07	1.39781e+07	0.026011	2.7987	1.07348	up
V2070	TG 60:15	4.93219e+08	4.42203e+08	5.81019e+08	4.29885e+08	1.82525e+08	2.9227e+08	1.36161e+08	3.20096e+08	2.63122e+08	2.84363e+08	2.83274e+08	7.00966e+07	0.032031	1.784	1.17659	up
V2071	TG 58:12	6.1807e+08	5.5414e+08	7.28095e+08	5.38704e+08	2.26923e+08	9.90612e+07	5.15574e+07	1.21519e+08	3.25083e+08	9.51068e+07	1.01464e+08	1.82272e+07	0.010406	3.8782	1.71331	up
V2077	TG 58:9	1927916110	4034679305	1741973608	1888971158	8.26731e+08	1318700178	9.03488e+08	1263334770	1010652223	5.34945e+08	1051003542	1.76044e+08	0.039083	2.3766	3.11477	up
V2082	TG 58:11	1161530476	1121852887	1155911776	8.79115e+08	5.46212e+08	9.61058e+08	4.68427e+08	747631603	8.03842e+08	6.15671e+08	8.52858e+08	3.66759e+08	0.025507	1.5111	1.66522	up
V2083	TG 58:11	3.60262e+08	5.85107e+08	3.26608e+08	3.68886e+08	1.71088e+08	2.65468e+08	1.07709e+08	1.55281e+08	1.64539e+08	1.83964e+08	1.55897e+08	1.40197e+07	0.0057935	2.6586	1.39302	up
V2086	d5-TG 58:11	8.8525e+08	2013332236	9.87988e+08	9.5663e+08	4.3438e+08	6.255e+08	2.2998e+08	7.35364e+08	2.62322e+08	6.60641e+08	4.93864e+08	248529143	0.04761	2.2439	2.13257	up
V2101	TG 58:7	5331550272	10716231735	6378128497	4640167626	1534788044	3740994303	1776509341	3928740502	3312475697	2708182315	1763191324	8.49905e+08	0.049222	2.2555	5.06641	up
V2121	TG 58:7	7.56588e+08	1449646507	7.16921e+08	5.95314e+08	275153366	4.62071e+08	1.58511e+08	4.55558e+08	3.64835e+08	1.53171e+08	3.4061e+08	1.06105e+08	0.028571	2.6955	2.00932	up
V2132	TG 58:6	8.32368e+08	1284319916	860387178	8.36205e+08	4.18073e+08	6.92564e+08	3.64081e+08	7.21708e+08	5.75067e+08	4.64633e+08	5.30947e+08	3.95512e+08	0.033501	1.6134	1.67958	up
V2158	TG 60:13	9.64343e+08	2590291733	9.05947e+08	9.94111e+08	1.65561e+08	5.60034e+08	1.57929e+08	2.15633e+08	1.82478e+08	2.21246e+08	1.29286e+08	1.56092e+07	0.027263	6.7018	2.73106	up
V2159	TG 60:13	3485955835	3299467891	3831865459	3042665959	8.42706e+08	1824529863	715079335	2225353813	1784317440	1948758936	1761919020	3.9801e+08	0.048657	1.8483	3.22377	up
V2160	TG 60:13	5.1731e+08	2.80255e+08	305993486	4.23269e+08	9.19761e+07	2.39624e+08	7.69228e+07	1.05643e+08	2.15831e+08	1.81043e+08	1.52547e+08	2.32972e+07	0.020577	2.4606	1.25277	up
V2165	PG O-50:5	1007885809	1091526761	1147416421	9.72935e+08	2.43469e+08	5.85476e+08	2.18814e+08	5.61411e+08	4.60303e+08	1.13195e+08	1.25241e+08	9.06091e+07	0.0057647	3.2166	2.18576	up
V2174	TG 60:11	3358932403	5430010125	4347054796	2894829394	1492601931	1990517666	6.18747e+08	2827083039	1279603970	1934250552	2081415961	3.43113e+08	0.034815	2.1481	3.83239	up
V2176	TG 60:13	534574215	1000221137	4.75597e+08	5.60167e+08	1.40451e+08	3.19317e+08	1.39292e+08	2.38614e+08	1.46204e+08	1.29901e+08	1.14008e+08	1.77968e+07	0.011629	3.8563	1.81444	up
V2181	TG 60:10	6051655557	6844991368	6333827108	5783071671	1989927266	4746463805	2082216857	3826708041	3735731973	3353483146	3064222692	2131540121	0.016381	1.7451	4.44547	up
V2184	TG 60:12	1182882986	1573712343	1167432021	1101349742	4.74562e+08	9.44143e+08	4.83631e+08	7.44859e+08	7.63041e+08	6.43795e+08	3.5837e+08	1.53302e+08	0.010979	2.0477	2.14046	up
V2189	TG 60:9	1076345548	1262189382	1081017375	9.33012e+08	4.24641e+08	8.6504e+08	4.60181e+08	7.99803e+08	6.20088e+08	4.91323e+08	517822253	2.97147e+08	0.013144	1.7707	1.85939	up
V2190	TG 60:9	9.22629e+08	1081931945	9.0341e+08	7.99765e+08	3.62117e+08	7.23471e+08	3.95244e+08	6.70004e+08	5.32153e+08	1.08272e+08	4.41462e+08	2.54711e+08	0.011563	1.9957	1.80626	up
V2196	TG 60:11	8.39125e+08	9.55138e+08	1150360385	9.65959e+08	4.21032e+08	7.3528e+08	2.11041e+08	6.29845e+08	4.49507e+08	5.87057e+08	5.99076e+08	2.19644e+08	0.011741	1.8793	1.74196	up
V2201	TG 60:8	5.14655e+08	1104276183	4.87038e+08	4.65109e+08	2.41597e+08	4.51945e+08	3.52103e+08	1.27879e+08	3.8055e+08	3.43058e+08	3.10856e+08	2.13065e+08	0.0249747	1.8898	1.42045	up
V2227	TG 60:8	5.63306e+08	4.27866e+08	594624027	4.79907e+08	178051637	1.06119e+08	1.2276e+08	3.01968e+08	7.30999e+07	7.40642e+07	6.90425e+07	1.81819e+07	0.0163092	3.5652	1.48551	up
V2259	TG 62:15	2.17822e+08	2.89714e+08	8.00748e+07	1.87286e+08	1.2947e+07	6.15439e+07	3.96202e+06	6.82247e+06	3.75231e+07	4.37081e+07	1.88133e+07	240861	0.019043	7.6473	1.08499	up
V2264	TG 62:14	7668231222	14253146736	6343377239	7677254319	1410078347	4452190415	1496142016	3584372287	2543649760	3579689130	1766458080	2.58347e+08	0.026144	3.1601	6.513	up
V2266	TG 62:14	4.61183e+08	4.58308e+08	2.22345e+08	3.93163e+08	5.58461e+07	2.44333e+08	2.39682e+07	4.34082e+07	1.49081e+08	1.11775e+08	114315143	5.43707e+06	0.0076875	4.0965	1.48736	up
V2269	TG 62:13	10216381254	14543803724	10133968227	9458487966	3076622435	7485343799	3155975151	7967428110	5843749430	5266760867	5302739483	1206985940	0.036595	1.9105	6.23019	up
V2274	TG 62:12	1350215753	2285869889	1267468761	1455950923	5.03897e+08	1373371543	5.35356e+08	1149140113	9.39132e+08	7.37932e+08	8.68986e+08	5.93464e+08	0.045909	1.7075	2.2406	up
V2277	TG 62:14	2274788377	3324864046	2051341935	2398370406	7.8276e+08	1756804095	7.71863e+08	1447535557	1237556244	1248828684	9.5053e+08	2.18013e+08	0.015742	2.143	3.1297	up
V2279	TG 62:11	1033556387	1696118286	1067501953	991016036	2.64971e+08	8.64031e+08	3.53403e+08	7.05043e+08	5.83179e+08	5.3577e+08	4.63564e+08	3.26777e+08	0.030922	1.9938	2.08567	up
V2282	TG 62:13	3.62827e+08	7.61464e+08	3.98277e+08	3.33927e+08	1.37333e+08	3.10783e+08	1.59434e+08	2.40985e+08	1.82618e+08	2.26059e+08	179606342	3.57588e+07	0.03774	2.2496	1.3304	up
V2290	TG 62:12	4.64356e+08	5.89718e+08	4.24767e+08	4.16982e+08	1.73783e+08	3.4707e+08	1.77695e+08	2.9215e+08	2.58114e+08	286443728	2.54378e+08	1.27594e+08	0.021269	1.7307	1.24529	up
V2319	TG 64:17	2.07131e+08	4.47135e+08	2.60061e+08	2.53626e+08	3.2911e+07	1.21178e+08	2.82711e+07	8.71064e+07	5.14071e+07	5.05887e+07	5.00288e+07	4.59242e+06	0.013663	4.8605	1.23319	up
V2323	TG 64:16	9.92143e+08	1779997540	752784595	1071871369	1.31566e+08	5.28856e+08	1.17679e+08	3.36225e+08	2.57622e+08	2.83745e+08	2.14327e+08	6.39456e+07	0.016845	4.128	2.46376	up
V2325	TG 64:15	8.76586e+08	1289842303	7.61077e+08	8.32727e+08	1.29679e+08	4.47828e+08	1.07296e+08	3.00278e+08	2.28765e+08	2.64079e+08	1.95555e+08	3.91574e+07	0.0094985	3.8214	2.22187	up
V2327	TG 64:14	3.05511e+08	5.12179e+08	2.7695e+08	3.27043e+08	7.94297e+07	1.96137e+08	7.12428e+07	1.84414e+08	1.50254e+08	1.24972e+08	1.3238e+08	8.71892e+07	0.027583	2.2616	1.21004	up
V2328	TG 64:14	4.66287e+08	4.57529e+08	3.1598e+08	3.71437e+08	109477582	2.72607e+08	1.93324e+08	1.65642e+08	2.31476e+08	3.01534e+08	1.72547e+08	3.15702e+07	0.045405	1.8186	1.11533	up
V2331	TG 64:16	4.42189e+08	5.04495e+08	3.34937e+08	4.44501e+08	9.22763e+07	3.07564e+08	8.00429e+07	1.9506e+08	1.6644e+08	1.49427e+08	1.49474e+08	5.73023e+07	0.0062503	2.665	1.42289	up
V2335	TG 64:15	2.79969e+08	3.45526e+08	2.4018e+08	2.63904e+08	6.86534e+07	1.81279e+08	5.89905e+07	1.39316e+08	1.12209e+08	1.09121e+08	9.68252e+07	3.11786e+07	0.0081394	2.519	1.12777	up
V2351	TG 66:18	1447639484	3180601092	1212519865	1595583345	1.74847e+08	7.20403e+08	1.25783e+08	5.37963e+08	3.5063e+08	3.22553e+08	2.81161e+08	3.37733e+07	0.02506	5.0438	3.16026	up
V2352	TG 66:18	2.011e+08	5.81537e+08	1.30145e+08	2.44074e+08	2.70321e+07	1.39862e+08	1.89789e+07	6.58795e+07	5.87824e+07	4.26658e+07	4.38878e+07	6.6884e+06	0.0442	5.5882	1.24463	up
V2355	TG 66:17	1.74712e+08	3.8542e+08	1.15673e+08	2.49159e+08	3.29101e+07	1.28801e+08	2.02839e+07	8.64472e+07	6.15699e+07	5.3439e+07	6.26767e+07	2.06281e+07	0.029248	3.5623	1.06908	up
V2358	TG 66:16	2.60176e+08	5.13288e+08	2.49977e+08	3.17785e+08	6.28356e+07	1.88319e+08	5.29316e+07	1.56929e+08	1.1775e+08	1.05712e+08	9.97885e+07	3.49221e+07	0.0229	2.8033	1.23293	up
V2360	TG 66:18	714073561	1301821623	7.03642e+08	8.26605e+08	1.41665e+08	473647802	1.05924e+08	3.88114e+08	2.6995e+08	2.27541e+08	2.32879e+08	3.3646e+07	0.015085	3.3078	2.08419	up
V2383	FA 14:0	1.98952e+08	2.77607e+08	333399423	2.98514e+08	4.34097e+08	3.67438e+08	6.45781e+08	666169600	3.93997e+08	524626666	4.13528e+08	5.76149e+08	0.0033954	0.59312	1.43323	down
V2390	FA 16:3	3.66878e+08	3.10647e+08	2.80175e+08	5.03892e+08	4.90068e+08	2.76804e+08	3.095e+08	3.13533e+08	2.13122e+08	2.41632e+08	101729621	1.96502e+08	0.02284	1.6195	1.06646	up
V2393	FA 16:1	5.41116e+08	7.68178e+08	1040583610	5.43458e+08	8.58285e+08	6.14302e+08	1269672266	1027653790	8.10593e+08	768000616	1129464914	1692238074	0.036313	0.65186	1.60006	down
V2507	PA 18:3	198270132	2.56659e+08	2.50938e+08	2.20733e+08	2.20146e+08	1.99511e+08	5.09645e+08	497505530	5.79841e+08	610566052	4.11433e+08	5.03458e+08	2.0648e-06	0.43254	1.62046	down
V2523	LPI O-10:0	273174588	4.30727e+08	424461229	3.21969e+08	345143710	2.34212e+08	1396097575	1203294753	9.88181e+08	1138567825	8.68399e+08	9.24556e+08	6.2069e-06	0.31134	2.63655	down
V2723	Cer 38:2	2.51093e+08	9.51991e+07	2.75477e+08	2.32304e+08	2.16766e+08	3.68154e+08	3.85524e+08	3.2598e+08	3.96264e+08	3.20839e+08	5.52677e+08	6.70481e+08	0.013611	0.54265	1.18202	down
V2960	PG 36:4	4.70256e+08	1400311654	3.99485e+08	6.79721e+08	2.96181e+08	2.70554e+08	238485943	1.78395e+08	2.94833e+08	1.41633e+08	1.06772e+08	1.19821e+08	0.00648531	3.2562	1.79742	up
V3132	LBPA 40:6	5.004e+08	517202570	6.27004e+08	4.70416e+08	4.15339e+08	6.71783e+08	5.78876e+07	1.72076e+08	138626081	1.48543e+08	1.12569e+08	1.41806e+08	2.6318e-06	4.1505	1.80385	up
V3212	PA 48:13	1.14533e+08	1.48819e+08	1.59789e+08	1.49012e+08	1.76545e+08	140584051	3.72057e+08	2.97981e+08	3.0977e+08	3.6195e+08	3.50179e+08	3.12892e+08	2.4734e-07	0.44357	1.32093	down
V3360	PI O-41:10	2.46778e+08	217376478	2.90521e+08	1.52007e+08	2.42666e+08	2.77056e+08	3.0101e+08	2.58041e+08	4.69587e+08	4.31606e+08	5.21365e+08	4.63955e+08	0.004779	0.58326	1.0723	down
