# Supplementary material for: Lipidomic Analysis on Gender-Dependent Hepatocellular Carcinogenesis in Hras12V Transgenic Mice
Source: Preprints.org preprint supplement (doi:10.20944/preprints202311.1406.v1), 2023-11-22
Supplement: Supplementary file 2 [file supplementary › Table.S6.docx]

**Table S6.** Primer sequences for RT-qPCR.

| Gene | Forward primer | Reverse primer |
| --- | --- | --- |
| *Scd2* | GAGATCTCTGGCGCTTACTCA | TTCAGGGCGAACATCTGCTC |
| *Lpl* | GGGTCACCTGGTCGAAGTATT | CTCTCTCTGCAATCACACGGA |
| *Acsl4* | CCTTTGGCTCATGTGCTGGAACT | CAGCGGCCATAAGTGTGGGTTT |
| *Acsl5* | ATCATTCGGCGGGACAGTTT | ACACCCAACATCCCATTGCA |
| *Cept1* | ACAGGCCAGAAGAACTAACAGT | GGATTTGTCCCAAGTTGTACTGC |
| *Chpt1* | TGTTCTGTGGATAGCAATGGTCA | CCGGTGCTTGTTGACATGAA |
| *Selenoi* | TCCTGGTAAGCACGTAGGGA | GGATGGCTGCTCTGATGAGG |
| *Pcyt2* | CCCGTGGACAGGATAAGCAG | TCAGGCAGGAGGGGTATCTC |
| *Ptdss1* | CAGTATCACCTGGGAGCTGAC | CAGCCAGATTCCACCACCAT |
| *Pla2g2e* | GAGAAGCTCGGAACCCAGAT | TTCTTCAGCTGATCCCGTGG |
